# Supplementary material for: Regiodivergent (3 + 2) annulation reactions of oxyallyl cations
Source: Royal Society of Chemistry journal article supplement (doi:10.1039/d2sc06999g), 2023-01-01

## Table of Contents

|                                                        |      |
|--------------------------------------------------------|------|
| I. GENERAL INFORMATION .....                           | S1   |
| II. EXPERIMENTAL PROCEDURES AND ANALYTICAL DATA.....   | S2   |
| Synthesis of Starting Materials .....                  | S2   |
| Annulation Reactions with Monobrominated Ketones ..... | S7   |
| Annulation Reactions with Dibrominated Ketones.....    | S12  |
| Debromination of <b>15b</b> .....                      | S17  |
| III. DFT STUDIES.....                                  | S18  |
| IV. X-RAY CRYSTALLOGRAPHIC DATA.....                   | S70  |
| V. NMR SPECTRA.....                                    | S113 |

## General Information

<sup>1</sup>H NMR data were recorded using a Bruker Avance III 500 MHz spectrometer (TBI probe) and a Bruker Avance III 600 MHz spectrometer (BBFO probe) with calibration of spectra to CDCl<sub>3</sub> (7.26 ppm). <sup>13</sup>C NMR data were recorded at 150 MHz using a Bruker Avance III 600 MHz spectrometer (BBFO probe) at ambient temperature (unless otherwise stated) and are expressed in ppm using solvent as the internal standard (CDCl<sub>3</sub> at 77.16 ppm). Two-dimensional NMR spectra, including COSY, HSQC, HMBC, and NOESY were recorded using a Bruker Avance III 600 MHz spectrometer (BBFO probe). Infrared spectra were recorded using a JASCO FT/IRM4100 Fourier transform infrared spectrometer. Electronic paramagnetic resonance spectra were recorded using an Elexsys E500 CW-EPR spectrometer. Chemical shift values (δ) are expressed in ppm downfield relative to internal standard (tetramethylsilane at 0 ppm). Multiplicities are indicated as s (singlet), d (doublet), t (triplet), q (quartet), m (multiplet), and br s (broad singlet). Coupling constants are reported in hertz (Hz). Analytical thin-layer chromatography (TLC) was performed on SiliCycle precoated TLC plates (silica gel 60 F254, 0.25 mm). Visualization was accomplished with UV light and/or with ceric ammonium molybdate (CAM) or KMnO<sub>4</sub> staining solutions. Flash column chromatography was performed using a Biotage Isolera system on Biotage SNAP Ultra columns (part nos. FSUL-0442-0010 and FSUL-0442-0025). High-resolution mass spectra were acquired from the Mass Spectrometry Laboratory of University of Illinois (Urbana-Champaign, IL).

Reagents were used as received without purification unless stated otherwise. Tetrahydrofuran, methylene chloride, and dimethylformamide were dried and purified by the solvent system using the glass contour solvent purification system (from Pure Process Technology, LLC) by passing the solvents through two drying columns. The room temperature in the laboratory was measured at 20.0 °C.

## A. Synthesis of Substituted Indoles 8a–d:

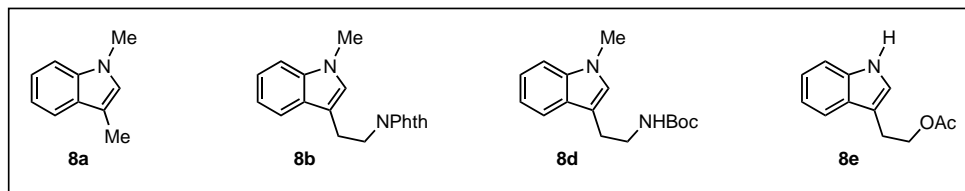

Compounds **8a-b**, **8d**<sup>1</sup> and **8e**<sup>2</sup> were synthesized according to known procedures.

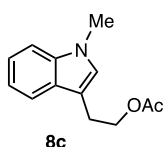

Indole **8c** was prepared using a modified procedure previously reported in the literature.<sup>3</sup> To a flame dried 100 mL round bottom flask indole **8e** (1.24 g, 6.13 mmol, 1.0 equiv) was dissolved in 61.3 mL dry THF (0.1 M) under an atmosphere of nitrogen. The solution was then cooled to 0 °C and NaH (294 mg, 7.36 mmol, 1.2 equiv) was added in 4 portions over 20 minutes. MeI (0.401 mL, 6.44 mmol, 1.05 equiv) was added dropwise to the reaction mixture over 20 minutes and then was allowed to slowly warm to room temperature overnight. When the reaction was determined complete by thin-layer chromatographic analysis the reaction mixture was cooled back down to 0 °C and carefully diluted with water. The aqueous layer was extracted 3x with equal volume EtOAc. The combined organic layers were then extracted 3x 50% brine, 3x sat. brine, dried over anhydrous Na<sub>2</sub>SO<sub>4</sub>, and concentrated in vacuo. The residue was purified *via* silica gel flash column chromatography (hexanes/EtOAc) to afford the desired indole **8c** (1.05 g, 79%). The <sup>1</sup>H NMR spectrum of the product was consistent with what was reported in the literature.

## B. Synthesis of Substituted Cyclopentanones 19b–d:

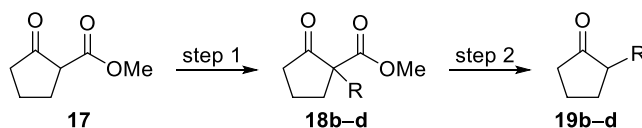

### General Procedure A:

**Step 1:** All alkylated compounds other than **18d** were prepared using a modified procedure previously reported in the literature.<sup>4</sup>

To a stirring mixture of K<sub>2</sub>CO<sub>3</sub> (2.4 equiv) in acetone (0.2 M) was added methyl 2-oxocyclopentane carboxylate **17**. The reaction mixture was cooled to 0 °C then alkyl halide (1.2 equiv) dissolved in acetone was added slowly to the mixture at 0 °C. The reaction mixture was then warmed to room temperature and then heated to reflux. When the reaction was determined complete by thin-layer chromatographic analysis the reaction mixture was then cooled back to room temperature, filtered through a celite pad and washed with excess acetone. The filtrate was then concentrated, and the residue was purified *via* silica gel flash column chromatography (hexanes/EtOAc) to afford alkylated product **18**.

**Step 2:** All cyclopentanones other than **19d** were prepared using a modified procedure previously reported in the literature.<sup>5</sup>

<sup>1</sup> Touchette, S. J.; Dunkley, E. M.; Lowder, L. L.; Wu, J. *Chem. Sci.* **2019**, *10*, 7812.

<sup>2</sup> Jia, W.-L.; He, J.; Yang, J.-J.; Gao, X.-W.; Wu, L.-Z.; Liu, Q. *J. Org. Chem.* **2016**, *81*, 7172-7181.

<sup>3</sup> Leeson, P.D.; *J. Chem. Soc. Perkin Trans. 1*, **1984**, 2125-2128.

<sup>4</sup> Abraham et al. *Tetrahedron: Asymmetry*. **2011**, *22*, 69–100.

<sup>5</sup> Kato et al. *Chem. Pharm. Bull.* **1995**, *43*, 2152-2158.

To a stirring mixture of **18** (1.0 equiv) in glacial acetic acid (0.9 M) was added 12.5% aqueous sulfuric acid dropwise at room temperature until a reaction concentration of 0.6 M was reached. The mixture was then heated to reflux. When the reaction was determined complete by thin-layer chromatographic analysis the reaction mixture was cooled to 0 °C. The mixture was then carefully neutralized with 1 M NaOH until a pH of ~7 was reached, then a small amount of saturated sodium bicarbonate was added. The neutral mixture was then extracted with EtOAc. The organic layers were combined and then washed with brine, dried over Na<sub>2</sub>SO<sub>4</sub>, and concentrated in vacuo. The crude oil of **19a–c** was used without further purification.

#### General Procedure B :

**Step 1:** Methyl 1-benzyl-2-oxocyclopentane-1-carboxylate was prepared using a modified procedure previously reported in the literature (**18d**).<sup>6</sup>

To a THF (0.1 M) solution of methyl 2-oxocyclopentane carboxylate (1.0 equiv, **17**) cooled at 0 °C, NaH (1.3 equiv, 60% dispersion in mineral oil) was slowly added. The reaction mixture was warmed to room temperature and allowed to stir at this temperature for 30 minutes. The reaction mixture was cooled back down to 0 °C and then benzyl chloride (1.2 equiv) was slowly added, and the mixture was then heated to reflux. When the reaction was determined complete by thin-layer chromatographic analysis the reaction mixture was cooled to 0 °C and quenched with distilled water. The organic layer was separated, and the aqueous layer was extracted with EtOAc. The organic layers were combined then washed with brine, dried over Na<sub>2</sub>SO<sub>4</sub>, and concentrated in vacuo. The residue was purified *via* silica gel flash column chromatography (hexanes/EtOAc) to afford alkylated product **18**.

#### Step 2:

To a stirring mixture of **18** (1.0 equiv) in glacial acetic acid (0.9 M) was added 12.5% aqueous sulfuric acid dropwise at room temperature until a reaction concentration of 0.6 M was reached. The mixture was then heated to reflux. When the reaction was determined complete by thin-layer chromatographic analysis the reaction mixture was cooled to 0 °C. The mixture was then carefully neutralized with 1 M NaOH until a pH of ~7 was reached then a small amount of saturated sodium bicarbonate was added. The neutral mixture was then extracted with EtOAc. The organic layers were combined and then washed with brine, dried over Na<sub>2</sub>SO<sub>4</sub>, and concentrated in vacuo. The crude oil of **19d** was used without further purification.

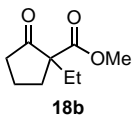

Following General Procedure A, a mixture of **17** (8.52 g, 59.9 mmol, 1.0 equiv), bromoethane (5.23 mL, 70.56 mmol, 1.2 equiv), and K<sub>2</sub>CO<sub>3</sub> (19.84 g, 140.8 mmol, 2.4 equiv) in acetone (293 mL, 0.2 M) afforded 1,3-ketoester **18b** as a colorless oil that was found to be homogeneous as judged by <sup>1</sup>H NMR spectroscopy (7.61 g, 76%). <sup>1</sup>H NMR (600 MHz, CDCl<sub>3</sub>) δ 3.70 (s, 3H), 2.56 – 2.47 (m, 1H), 2.45 – 2.35 (m, 1H), 2.30 – 2.19 (m, 1H), 2.05 – 1.84 (m, 4H), 1.64 (m, *J* = 7.4 Hz, 1H), 0.89 (t, *J* = 7.4 Hz, 3H). <sup>13</sup>C NMR (150 MHz, CDCl<sub>3</sub>) δ 215.35, 171.91, 61.31, 52.80, 38.45, 32.55, 27.25, 19.89, 9.59. FTIR (neat, cm<sup>-1</sup>) 2962.13, 2875.34, 1736.58. HRMS (ESI) calcd. for C<sub>9</sub>H<sub>14</sub>O<sub>3</sub> (*m/z* M+Na<sup>+</sup>): 193.0841, found 193.0842.

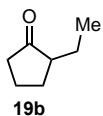

Following General Procedure A, a mixture of **18b** (7.16 g, 44.7 mmol, 1.0 equiv), glacial acetic acid (24.9 mL, 0.4 M), and 12.5% aqueous sulfuric acid (21.7 mL, 0.2 M) afforded cyclopentanone **19b** as a pale yellow oil that was found to be homogeneous as judged by <sup>1</sup>H NMR spectroscopy (3.40 g, 68%). <sup>1</sup>H NMR (600 MHz, CDCl<sub>3</sub>) δ 2.34 – 2.24 (m, 1H), 2.24 – 2.15 (m, 1H), 2.14 – 2.04 (m, 1H), 2.03 – 1.94 (m, 2H), 1.82 – 1.71 (m, 2H), 1.58 – 1.47 (m, 1H), 1.37 – 1.26 (m, 1H), 0.93 (t, *J* = 0.9 Hz, 3H). <sup>13</sup>C NMR (150 MHz, CDCl<sub>3</sub>) δ 221.86, 50.90, 38.65, 29.33, 22.99, 21.03, 12.22. FTIR (neat, cm<sup>-1</sup>) 2968.87, 2883.06, 1750.08, 1725.98. HRMS (EI) calcd. for C<sub>7</sub>H<sub>12</sub>O: 112.0888, found 112.0889.

<sup>6</sup> Orito et al. *J. Org. Chem.* **2006**, *71*, 5951–5958.

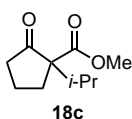

Following General Procedure A, a mixture of **17** (4.26 g, 29.9 mmol, 1.0 equiv), 2-iodopropane (3.58 mL, 35.2 mmol, 1.2 equiv), and  $K_2CO_3$  (19.84 g, 70.4 mmol, 2.4 equiv) in acetone (146 mL, 0.2 M) afforded 1,3-ketoester **18c** as a colorless oil that was found to be homogeneous as judged by  $^1H$  NMR spectroscopy (2.22 g, 41%).  $^1H$  NMR (600 MHz,  $CDCl_3$ )  $\delta$  3.70 (s, 3H), 2.57 (hept,  $J = 6.9$  Hz, 1H), 2.52 – 2.44 (m, 1H), 2.43 – 2.36 (m, 1H), 2.17 – 2.08 (m, 1H), 1.99 – 1.84 (m, 3H), 0.87 (d,  $J = 6.8$  Hz, 3H), 0.83 (d,  $J = 6.9$  Hz, 3H).  $^{13}C$  NMR (150 MHz,  $CDCl_3$ )  $\delta$  215.23, 171.16, 65.95, 52.93, 39.50, 32.54, 27.70, 20.02, 18.88, 18.16. FTIR (neat,  $cm^{-1}$ ) 2965.02, 2879.20, 1749.12, 1720.19. HRMS (ESI) calcd. for  $C_{10}H_{16}O_3$  ( $m/z$   $M+Na^+$ ): 207.0997 found 207.0999.

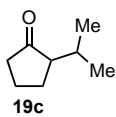

Following General Procedure A, a mixture of **18c** (2.22 g, 12.0 mmol, 1.0 equiv), glacial acetic acid (13.4 mL, 0.4 M), and 12.5% aqueous sulfuric acid (6.7 mL, 0.2 M) afforded cyclopentanone **19c** as a pale yellow oil that was found to be homogeneous as judged by  $^1H$  NMR spectroscopy (625 mg, 41%).  $^1H$  NMR (600 MHz,  $CDCl_3$ )  $\delta$  2.33 – 2.23 (m, 1H), 2.18 – 2.09 (m, 1H), 2.08 – 1.94 (m, 4H), 1.78 – 1.61 (m, 2H), 0.98 (d,  $J = 6.9$  Hz, 3H), 0.81 (d,  $J = 6.8$  Hz, 3H).  $^{13}C$  NMR (150 MHz,  $CDCl_3$ )  $\delta$  221.53, 55.41, 39.54, 27.70, 24.95, 21.45, 20.94, 18.72. FTIR (neat,  $cm^{-1}$ ) 2960.20, 2874.38, 1734.66. HRMS (EI) calcd. for  $C_8H_{14}O$ : 126.1044, found 126.1043.

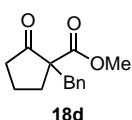

Following General Procedure B, a mixture of **17** (8.52 g, 59.9 mmol, 1.0 equiv), NaH (3.11 g, 77.9 mmol, 1.3 equiv), and benzyl chloride (8.24 mL, 71.9 mmol, 1.2 equiv) in THF (60 mL, 0.1 M) afforded 1,3-ketoester **18d** as a colorless oil that was found to be homogeneous as judged by  $^1H$  NMR spectroscopy (8.55 g, 61%).  $^1H$  NMR (600 MHz,  $CDCl_3$ )  $\delta$  7.28 – 7.19 (m, 3H), 7.15 – 7.10 (m, 2H), 3.73 (s, 3H), 3.21 (d,  $J = 13.7$  Hz, 1H), 3.12 (d,  $J = 13.8$  Hz, 1H), 2.46 – 2.33 (m, 2H), 2.09 – 2.00 (m, 1H), 2.00 – 1.84 (m, 2H), 1.64 – 1.55 (m, 2H).  $^{13}C$  NMR (150 MHz,  $CDCl_3$ )  $\delta$  215.19, 171.73, 136.86, 130.48, 128.75, 127.23, 61.85, 52.99, 39.50, 38.72, 32.04, 19.78. FTIR (neat,  $cm^{-1}$ ) 3086.51, 3062.41, 3028.66, 2954.41, 2889.81, 1958.36, 1884.11, 1752.01, 1726.94. HRMS (ESI) calcd. for  $C_{14}H_{16}O_3$  ( $m/z$   $M+Na^+$ ): 255.0997 found 255.0998

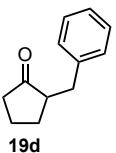

Following General Procedure B, a mixture of **18d** (5.1 g, 21.9 mmol, 1.0 equiv), glacial acetic acid (24.3 mL, 0.4 M), and 12.5% aqueous sulfuric acid (10.6 mL, 0.2 M) afforded cyclopentanone **19d** as a colorless oil that was found to be homogeneous as judged by  $^1H$  NMR spectroscopy (3.14 g, 82%).  $^1H$  NMR (600 MHz,  $CDCl_3$ )  $\delta$  7.31 – 7.24 (m, 2H), 7.23 – 7.14 (m, 3H), 3.15 (dd,  $J = 13.9, 4.2$  Hz, 1H), 2.60 – 2.48 (m, 1H), 2.41 – 2.28 (m, 2H), 2.18 – 2.03 (m, 2H), 2.01 – 1.90 (m, 1H), 1.80 – 1.66 (m, 1H), 1.65 – 1.49 (m, 1H).  $^{13}C$  NMR (150 MHz,  $CDCl_3$ )  $\delta$  220.58, 140.35, 129.24, 128.76, 126.50, 51.38, 38.56, 35.94, 29.50, 20.89. FTIR (neat,  $cm^{-1}$ ) 3084, 3061, 3026, 2962, 2876, 1736. HRMS (ESI) calcd. for  $C_{12}H_{14}O$  ( $m/z$   $M+H^+$ ): 175.1123, found 175.1121.

### C. Preparation of Monobrominated Cyclopentanones 12a–e:

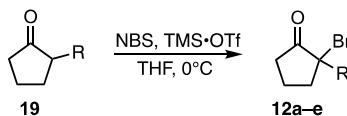

#### General Procedure C:

The desired monobrominated cyclopentanones were prepared from the corresponding ketones using a procedure previously reported in the literature.<sup>7</sup> To a solution of cyclopentanone **19** (1.0 equiv) in THF (0.2 M) was added NBS (1.1 equiv) and was allowed to completely dissolve. The reaction mixture was then cooled to 0 °C and TMS-OTf (0.1 equiv) was added dropwise and allowed to stir at this temperature. When the reaction was determined complete by thin-layer chromatographic analysis (and by color change of the reaction mixture from a light yellow to a colorless solution) the reaction mixture was quenched with saturated aq.  $NaHCO_3$  at 0 °C, filtered, and the residual solid was washed with EtOAc. The filtrate was extracted with EtOAc. The combined organic layers were then washed with brine, dried over  $Na_2SO_4$ , and concentrated in

<sup>7</sup> Guha, S.K.; Wu, B.; Kim, B.S.; Baik, W.; Koo, S. *Tetrahedron Lett.* **2006**, 47, 291-293.

vacuo. The residue was purified *via* silica gel flash column chromatography (hexanes/EtOAc) to afford the desired monobrominated product **12**.

**Note\*** These monobrominated compounds readily decompose and were thus carried forward immediately to (3+2) dearomative annulation following purification.

  
**12a** Following General Procedure C, a mixture of commercially-available 2-methylcyclopentan-1-one (2.18 mL, 20.38 mmol, 1.0 equiv), NBS (3.98 g, 22.4 mmol, 1.1 equiv) and TMS•OTf (0.368 mL, 2.04 mmol, 0.10 equiv) in THF (102 mL, 0.2 M) afforded monobrominated cyclopentanone **12a** as a pale yellow oil that was found to be approximately 95% pure as judged by <sup>1</sup>H NMR spectroscopy (2.06 g, 57%). <sup>1</sup>H NMR (600 MHz, CDCl<sub>3</sub>) δ 2.56 – 2.47 (m, 1H), 2.46 – 2.40 (m, 1H), 2.17 – 2.02 (m, 2H), 1.99 – 1.92 (m, 1H), 1.90 – 1.82 (m, 1H), 1.75 (s, 3H). <sup>13</sup>C NMR (150 MHz, CDCl<sub>3</sub>) δ 210.60, 64.23, 41.27, 34.19, 24.78, 18.62.

  
**12b** Following General Procedure C, a mixture of 2-ethylcyclopentan-1-one (**19b**) (400 mg, 3.56 mmol, 1.0 equiv), NBS (698 mg, 3.92 mmol, 1.1 equiv) and TMS•OTf (0.064 mL, 0.356 mmol, 0.10 equiv) in THF (17.8 mL, 0.2 M) afforded monobrominated cyclopentanone **12b** as a pale yellow oil that was found to be approximately 95% pure as judged by <sup>1</sup>H NMR spectroscopy (196 mg, 29%). <sup>1</sup>H NMR (600 MHz, CDCl<sub>3</sub>) δ 2.61 – 2.54 (m, 1H), 2.41 – 2.34 (m, 1H), 2.22 – 2.03 (m, 3H), 2.03 – 1.97 (m, 1H), 1.93 – 1.85 (m, 1H), 1.78 – 1.70 (m, 1H), 1.08 (t, *J* = 7.4 Hz, 3H). <sup>13</sup>C NMR (150 MHz, CDCl<sub>3</sub>) δ 211.08, 70.84, 38.48, 35.38, 30.69, 19.00, 10.46.

  
**12c** Following General Procedure C, a mixture of 2-isopropylcyclopentan-1-one (**19c**) (352 mg, 2.79 mmol, 1.0 equiv), NBS (546 mg, 3.07 mmol, 1.1 equiv) and TMS•OTf (0.050 mL, 0.279 mmol, 0.10 equiv) in THF (14 mL, 0.2 M) afforded monobrominated cyclopentanone **12c** as a pale yellow oil that was found to be approximately 95% pure as judged by <sup>1</sup>H NMR spectroscopy (409 mg, 71%). <sup>1</sup>H NMR (600 MHz, CDCl<sub>3</sub>) δ 2.61 – 2.52 (m, 1H), 2.37 (hept, *J* = 6.8 Hz, 1H), 2.27 – 2.19 (m, 1H), 2.17 – 2.08 (m, 1H), 2.07 – 1.95 (m, 3H), 1.23 (d, *J* = 6.7 Hz, 3H), 0.91 (d, *J* = 6.8 Hz, 3H). <sup>13</sup>C NMR (150 MHz, CDCl<sub>3</sub>) δ 211.09, 75.87, 36.47, 34.44, 34.17, 19.40, 18.81, 18.49.

  
**12d** Following General Procedure C, a mixture of 2-benzylcyclopentan-1-one (**19d**) (500 mg, 2.87 mmol, 1.0 equiv), NBS (561 mg, 3.15 mmol, 1.1 equiv) and TMS•OTf (0.052 mL, 0.287 mmol, 0.10 equiv) in THF (14.3 mL, 0.2 M) afforded monobrominated cyclopentanone **12d** as a pale yellow oil that was found to be approximately 95% pure as judged by <sup>1</sup>H NMR spectroscopy (440 mg, 60%). <sup>1</sup>H NMR (600 MHz, CDCl<sub>3</sub>) δ 7.32 – 7.24 (m, 3H), 7.24 – 7.20 (m, 2H), 3.45 – 3.36 (m, 2H), 2.55 (dd, *J* = 19.1, 17.7 Hz, 1H), 2.23 (dd, *J* = 14.5, 2.1 Hz, 1H), 2.16 – 2.07 (m, 1H), 2.05 – 1.86 (m, 3H). <sup>13</sup>C NMR (150 MHz, CDCl<sub>3</sub>) δ 210.68, 136.56, 130.91, 128.75, 127.48, 68.87, 43.37, 37.79, 35.59, 18.94.

  
**12e** Following General Procedure C, a mixture of commercially-available ethyl 2-(2-oxocyclopentyl)acetate (600 mg, 3.52 mmol, 1.0 equiv), NBS (690 mg, 3.86 mmol, 1.1 equiv) and TMS•OTf (0.069 mL, 0.352 mmol, 0.10 equiv) in THF (16 mL, 0.2 M) afforded monobrominated cyclopentanone **12e** as a pale yellow oil that was found to be approximately 90% pure as judged by <sup>1</sup>H NMR spectroscopy (347 mg, 40%). <sup>1</sup>H NMR (600 MHz, CDCl<sub>3</sub>) δ 4.14 (q, *J* = 6.9 Hz, 2H), 3.23 (s, 2H), 2.55 (dd, *J* = 10.8, 8.3 Hz, 1H), 2.50 – 2.44 (m, 1H), 2.41 – 2.33 (m, 1H), 2.30 – 2.22 (m, 1H), 2.21 – 2.11 (m, 1H), 2.10 – 2.03 (m, 1H), 1.26 (t, *J* = 7.1 Hz, 3H). <sup>13</sup>C NMR (150 MHz, CDCl<sub>3</sub>) δ 210.10, 169.75, 62.57, 61.40, 42.48, 38.57, 34.94, 19.21, 14.43.

#### D. Synthesis of Dibrominated Cyclopentanones 14a–b, d–f:

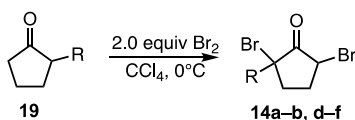

## General Procedure D:

The desired dibrominated cyclopentanones were prepared from the corresponding ketones using a procedure previously reported in the literature.<sup>8-9</sup> Cyclopentanone **19** (1.0 equiv) was dissolved in CCl<sub>4</sub> (1.0 M) and then cooled to 0 °C. Bromine (2.0 equiv) was then added dropwise and allowed to stir at this temperature. When the reaction was determined complete by thin-layer chromatographic analysis (and by color change of the reaction mixture from dark red to a near-colorless solution) the reaction mixture was quenched with saturated aq. Na<sub>2</sub>S<sub>2</sub>O<sub>3</sub> at 0 °C. The mixture was extracted with DCM and the combined organic layers were then washed with brine, dried over Na<sub>2</sub>SO<sub>4</sub>, and concentrated in vacuo. The crude oil was used without further purification to furnish dibrominated product **14**.

**Note\*** These dibrominated compounds readily decompose and were thus carried forward immediately to the (3+2) dearomative annulation following purification.

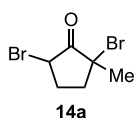

Following General Procedure D, a mixture of 2-methylcyclopentan-1-one (0.200 mL, 2.03 mmol, 1.0 equiv) and bromine (0.208 mL, 4.06 mmol, 2.0 equiv) in CCl<sub>4</sub> (2.0 mL, 1.0 M) afforded dibrominated cyclopentanone **14a** as a pale yellow oil that was found to be approximately 85% pure as judged by <sup>1</sup>H NMR spectroscopy (510 mg, 98%). <sup>1</sup>H NMR (600 MHz, CDCl<sub>3</sub>) δ 4.53 (d, *J* = 6.4 Hz, 1H), 2.77 – 2.67 (m, 1H), 2.52 – 2.45 (m, 1H), 2.42 – 2.34 (m, 1H), 2.28 – 2.22 (m, 1H), 1.95 (s, 3H). <sup>13</sup>C NMR (150 MHz, CDCl<sub>3</sub>) δ 204.21, 62.39, 45.30, 44.21, 39.10, 39.09, 39.07, 31.07, 27.72, 26.94, 26.92.

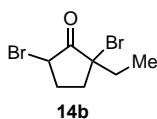

Following General Procedure D, a mixture of 2-ethylcyclopentan-1-one (**19b**) (0.200 mL, 2.03 mmol, 1.0 equiv) and bromine (0.208 mL, 4.06 mmol, 2.0 equiv) in CCl<sub>4</sub> (2.0 mL, 1.0 M) afforded dibrominated cyclopentanone **14b** as a pale yellow oil that was found to be homogeneous as judged by <sup>1</sup>H NMR spectroscopy (510 mg, 98%). <sup>1</sup>H NMR (600 MHz, CDCl<sub>3</sub>) δ 4.51 (d, *J* = 6.6 Hz, 1H), 2.76 – 2.64 (m, 1H), 2.43 – 2.31 (m, 2H), 2.31 – 2.21 (m, 2H), 2.00 – 1.88 (m, 1H), 1.12 (t, *J* = 7.53, 2.4 Hz, 3H). <sup>13</sup>C NMR (151 MHz, CDCl<sub>3</sub>) δ 204.14, 68.71, 45.79, 35.89, 32.05, 31.04, 10.54.

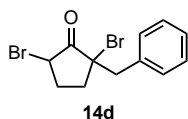

Following General Procedure D, a mixture of 2-benzylcyclopentan-1-one (**19d**) (0.300 mL, 1.72 mmol, 1.0 equiv) and bromine (0.176 mL, 3.44 mmol, 2.0 equiv) in CCl<sub>4</sub> (1.72 mL, 1.0 M) afforded dibrominated cyclopentanone **14d** as a pale yellow oil that was found to be approximately 90% pure as judged by <sup>1</sup>H NMR spectroscopy (488 mg, 86%). <sup>1</sup>H NMR (600 MHz, CDCl<sub>3</sub>) δ 7.35 – 7.27 (m, 4H), 7.25 – 7.22 (m, 1H), 4.49 (d, *J* = 6.3 Hz, 1H), 3.48 (s, 2H), 2.69 (ddd, *J* = 14.6, 12.0, 6.1 Hz, 1H), 2.44 (ddd, *J* = 14.7, 12.0, 6.2 Hz, 1H), 2.22 (dd, *J* = 14.8, 6.2 Hz, 1H), 2.18 – 2.12 (m, 1H). <sup>13</sup>C NMR (150 MHz, CDCl<sub>3</sub>) δ 203.49, 135.62, 131.06, 128.81, 127.78, 67.29, 45.40, 44.22, 35.34, 31.01.

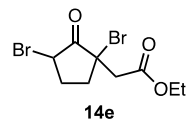

Following General Procedure D, a mixture of ethyl 2-(2-oxocyclopentyl)acetate (400 mg, 2.35 mmol, 1.0 equiv) and bromine (0.240 mL, 4.70 mmol, 2.0 equiv)\* in CCl<sub>4</sub> (2.4 mL, 1.0 M) afforded dibrominated cyclopentanone **12e** as a pale yellow oil that was found to be an inseparable 5:3 mixture of what we believe to be diastereomers of the desired product (696 mg, 90% combined). <sup>1</sup>H NMR (600 MHz, CDCl<sub>3</sub>) see spectrum <sup>13</sup>C NMR (150 MHz, CDCl<sub>3</sub>) see spectrum.

\*2.1 equiv of bromine was used instead of 2.0 equiv as described in general procedure D

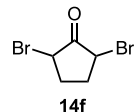

Dibromocyclopentanone **14f** was prepared according to literature procedure<sup>10</sup> (1.2 g, 14%). The <sup>1</sup>H NMR spectrum of the product was consistent with what was reported in the literature.

<sup>8</sup> Qiao, J.-B.; Zhao, Y.-M.; Gu, P. M. *Org. Lett.* **2016**, *18*, 1984– 1987,

<sup>9</sup> Fry, A. J.; O'Dea, J. J. *J. Org. Chem.* **1975**, *40*, 3625– 3631.

<sup>10</sup> Folkins, P. L.; Harpp, D. N. *J. Org. Chem.* **1992**, *57*, 2013.

## E. Annulation Reactions with Monobrominated Ketones:

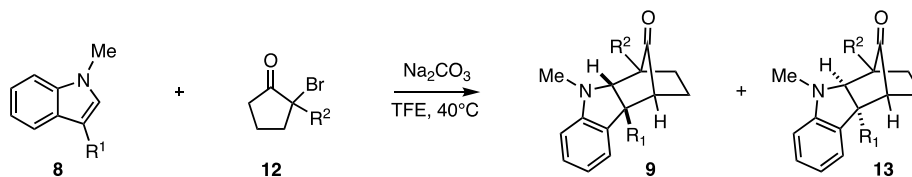

### General Procedure E:

To a solution of indole **8** (1.0 equiv) in trifluoroethanol (0.2 M) was sequentially added sodium carbonate (3.0 equiv) and  $\alpha$ -bromocyclopentanone **12** (1.3 equiv). The reaction mixture was stirred at 40 °C until the reaction was judged complete as determined by thin-layer chromatographic analysis and then cooled to room temperature. The mixture was filtered through a short pad of silica gel and washed with EtOAc. The filtrate was concentrated and the residue was purified via silica gel flash column chromatography (hexanes/EtOAc) to afford ketone **9** as the major product and diastereomer **13** as the minor product.

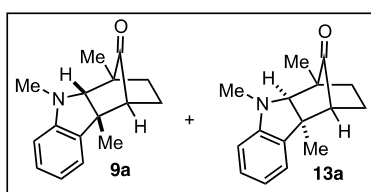

Following General Procedure E, a mixture of indole (100 mg, 0.689 mmol, 1.0 equiv), sodium carbonate (219 mg, 2.06 mmol, 3.0 equiv), and cyclopentanone **12a** (158 mg, 0.895 mmol, 1.3 equiv) in TFE (3.4 mL, 0.2 M) afforded ketone **9a** as a colorless solid that was found to be homogeneous as judged by <sup>1</sup>H NMR spectroscopy (133 mg, 80%). **<sup>1</sup>H NMR** (600 MHz, CDCl<sub>3</sub>)  $\delta$  7.11 (t,  $J$  = 7.7 Hz, 1H), 6.88 (d,  $J$  = 7.3 Hz, 1H), 6.62 (t,  $J$  = 7.3 Hz, 1H), 6.39 (d,  $J$  = 7.8 Hz, 1H), 3.20 (s, 1H), 2.86 (s, 3H), 2.00 (d,  $J$  = 4.9 Hz, 1H), 1.91 (td,  $J$  = 11.7, 4.6 Hz, 1H), 1.68 – 1.59 (m, 1H), 1.36 – 1.25 (m, 5H), 1.17 (s, 3H). **<sup>13</sup>C NMR** (150 MHz, CDCl<sub>3</sub>)  $\delta$  215.92, 154.05, 132.08, 128.79, 124.43, 117.13, 105.62, 77.86, 50.22, 48.33, 48.03, 35.07, 28.28, 23.62, 20.04, 15.02. **FTIR** (film, cm<sup>-1</sup>) 3024.80, 2951.52, 2921.63, 2863.77, 1765.51, 1607.38. **HRMS** (ESI) calcd. for C<sub>16</sub>H<sub>19</sub>NO ( $m/z$  M+H<sup>+</sup>): 242.1545, found 242.1549.

Ketone **13a** was also isolated as a colorless solid that was found to be homogeneous as judged by <sup>1</sup>H NMR spectroscopy (5.20 mg, 3%). **<sup>1</sup>H NMR** (600 MHz, CDCl<sub>3</sub>)  $\delta$  7.03 (t,  $J$  = 7.7 Hz, 1H), 6.88 (d,  $J$  = 7.3 Hz, 1H), 6.61 (t,  $J$  = 7.3 Hz, 1H), 6.32 (d,  $J$  = 7.9 Hz, 1H), 3.00 (s, 1H), 2.87 (s, 3H), 2.09 (d,  $J$  = 3.9 Hz, 1H), 2.01 – 1.93 (m, 1H), 1.82 – 1.74 (m, 1H), 1.70 – 1.61 (m, 2H), 1.45 (s, 3H), 1.08 (s, 3H). **<sup>13</sup>C NMR** (150 MHz, CDCl<sub>3</sub>)  $\delta$  215.66, 151.80, 135.12, 128.84, 123.52, 118.02, 107.20, 80.61, 50.02, 49.41, 47.99, 37.50, 28.14, 25.25, 18.73, 12.10. **FTIR** (film, cm<sup>-1</sup>) 3013.23, 2970.80, 2926.45, 2873.42, 1762.62, 1603.52. **HRMS** (ESI) calcd. for C<sub>16</sub>H<sub>19</sub>NO ( $m/z$  M+H<sup>+</sup>): 242.1545, found 242.1544.

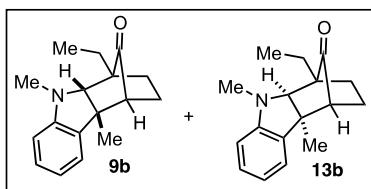

Following General Procedure E, a mixture of indole (100 mg, 0.689 mmol, 1.0 equiv), sodium carbonate (219 mg, 2.06 mmol, 3.0 equiv), and cyclopentanone **12b** (171 mg, 0.895 mmol, 1.3 equiv) in TFE (3.4 mL, 0.2 M) afforded ketone **9b** as a colorless solid that was found to be homogeneous as judged by <sup>1</sup>H NMR spectroscopy (141 mg, 80%). **<sup>1</sup>H NMR** (600 MHz, CDCl<sub>3</sub>)  $\delta$  7.12 (t,  $J$  = 7.7 Hz, 1H), 6.88 (d,  $J$  = 7.2 Hz, 1H), 6.64 (t,  $J$  = 7.3 Hz, 1H), 6.41 (d,  $J$  = 7.9 Hz, 1H), 3.35 (s, 1H), 2.85 (s, 3H), 1.96 (d,  $J$  = 4.9 Hz, 1H), 1.84 (td,  $J$  = 11.2, 4.6 Hz, 1H), 1.71 – 1.58 (m, 3H), 1.43 (td,  $J$  = 12.2, 2.0 Hz, 1H), 1.33 – 1.25 (m, 4H), 1.03 (t,  $J$  = 7.6 Hz, 3H). **<sup>13</sup>C NMR** (150 MHz, CDCl<sub>3</sub>)  $\delta$  215.71, 154.34, 132.23, 128.75, 124.43, 117.37, 106.14, 75.26, 51.82, 50.55, 48.11, 35.69, 28.26, 22.14, 21.37, 19.85, 9.57. **FTIR** (film, cm<sup>-1</sup>) 3021.91, 2962.13, 2878.24, 2820.38, 1760.69, 1605.45. **HRMS** (ESI) calcd. for C<sub>17</sub>H<sub>21</sub>NO ( $m/z$  M+H<sup>+</sup>): 256.1701, found 256.1703.

Ketone **13b** was also isolated as a colorless solid that was found to be homogeneous as judged by <sup>1</sup>H NMR spectroscopy (9.90 mg, 6%). **<sup>1</sup>H NMR** (600 MHz, CDCl<sub>3</sub>)  $\delta$  7.04 (t,  $J$  = 7.7 Hz, 1H), 6.89 (d,  $J$  = 7.3 Hz, 1H), 6.62 (t,  $J$  = 7.3 Hz, 1H), 6.35 (d,  $J$  = 7.9 Hz, 1H), 3.08 (s, 1H), 2.88 (s, 3H), 2.07 (d,  $J$  = 3.4 Hz, 1H), 2.00 – 1.95 (m, 1H), 1.78 – 1.73 (m, 2H), 1.68 – 1.52 (m, 3H), 1.45 (s, 3H), 0.96 (t,  $J$  = 7.6 Hz, 3H). **<sup>13</sup>C NMR** (150 MHz, CDCl<sub>3</sub>)  $\delta$  215.45, 152.13, 135.20, 128.78, 123.47, 118.20, 107.57, 78.93, 53.14, 50.45, 47.82, 37.86,



25.34, 24.47, 18.62, 18.55, 9.32. **FTIR** (film,  $\text{cm}^{-1}$ ) 3048.91, 2962.13, 2877.27, 2817.49, 1767.44, 1604.48. **HRMS** (ESI) calcd. for  $\text{C}_{17}\text{H}_{21}\text{NO}$  ( $m/z$   $\text{M}+\text{H}^+$ ): 256.1701, found 256.1701.

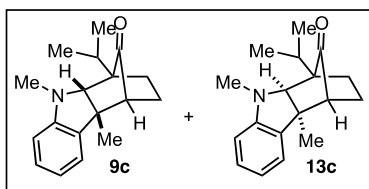

Following General Procedure E, a mixture of indole (100 mg, 0.689 mmol, 1.0 equiv), sodium carbonate (219 mg, 2.06 mmol, 3.0 equiv), and cyclopentanone **12c** (183 mg, 0.895 mmol, 1.3 equiv) in TFE (3.4 mL, 0.2 M) afforded ketone **9c** as a colorless solid that was found to be homogeneous as judged by  $^1\text{H}$  NMR spectroscopy (110 mg, 59%).  **$^1\text{H}$  NMR** (600 MHz,  $\text{CDCl}_3$ )  $\delta$  7.13 (t,  $J = 7.7$  Hz, 1H), 6.89 (d,  $J = 7.3$  Hz, 1H), 6.68 (t,  $J = 7.3$  Hz, 1H), 6.49 (d,  $J = 7.9$  Hz, 1H), 3.50 (s, 1H), 2.87 (s, 3H), 2.00 – 1.91 (m, 3H), 1.63 – 1.54 (m, 1H), 1.45 (td,  $J = 12.1, 2.1$  Hz, 1H), 1.30 (s, 3H), 1.24 (td,  $J = 11.2, 4.6$  Hz, 2H), 1.10 – 1.04 (apparent triplet 6H).  **$^{13}\text{C}$  NMR** (150 MHz,  $\text{CDCl}_3$ )  $\delta$  215.56, 155.19, 132.61, 128.70, 124.33, 118.05, 107.67, 73.66, 55.02, 50.57, 48.43, 37.72, 28.32, 27.28, 21.38, 19.72, 19.20, 19.09. **FTIR** (film,  $\text{cm}^{-1}$ ) 3049.87, 2960.20, 2876.31, 2815.56, 1760.69, 1605.45. **HRMS** (ESI) calcd. for  $\text{C}_{18}\text{H}_{23}\text{NO}$  ( $m/z$   $\text{M}+\text{H}^+$ ): 270.1858, found 270.1856.

Ketone **13c** was also isolated as a colorless solid that was found to be homogeneous as judged by  $^1\text{H}$  NMR spectroscopy (19.4 mg, 10%).  **$^1\text{H}$  NMR** (600 MHz,  $\text{CDCl}_3$ )  $\delta$  7.04 (t,  $J = 7.7$  Hz, 1H), 6.89 (d,  $J = 7.3$  Hz, 1H), 6.64 (t,  $J = 7.4$  Hz, 1H), 6.39 (d,  $J = 7.9$  Hz, 1H), 3.10 (s, 1H), 2.90 (s, 3H), 2.23 (hept,  $J = 6.8$  Hz, 1H), 2.02 – 1.88 (m, 3H), 1.75 – 1.67 (m, 1H), 1.45 (s, 3H), 1.43 – 1.35 (m, 1H), 1.01 (d,  $J = 6.7$  Hz, 3H), 0.94 (d,  $J = 6.9$  Hz, 3H).  **$^{13}\text{C}$  NMR** (150 MHz,  $\text{CDCl}_3$ )  $\delta$  214.53, 152.71, 135.29, 128.71, 123.44, 118.52, 108.18, 79.14, 56.30, 51.02, 47.45, 38.82, 25.49, 23.49, 20.38, 19.33, 18.54, 16.94. **FTIR** (film,  $\text{cm}^{-1}$ ) 3049.87, 2959.23, 2927.41, 2873.42, 2817.49, 1765.51, 1604.48. **HRMS** (ESI) calcd. for  $\text{C}_{18}\text{H}_{23}\text{NO}$  ( $m/z$   $\text{M}+\text{H}^+$ ): 270.1858, found 270.1855.

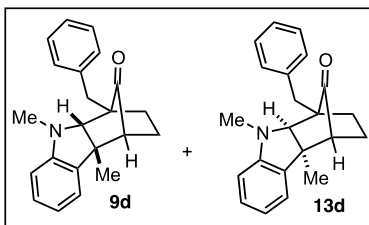

Following General Procedure E, a mixture of indole (100 mg, 0.689 mmol, 1.0 equiv), sodium carbonate (219 mg, 2.06 mmol, 3.0 equiv), and cyclopentanone **12d** (226 mg, 0.895 mmol, 1.3 equiv) in TFE (3.4 mL, 0.2 M) afforded ketone **9d** as a colorless solid that was found to be homogeneous as judged by  $^1\text{H}$  NMR spectroscopy (164 mg, 75%).  **$^1\text{H}$  NMR** (600 MHz,  $\text{CDCl}_3$ )  $\delta$  7.36 – 7.27 (m, 4H), 7.24 – 7.19 (m, 1H), 7.10 (t,  $J = 7.7$  Hz, 1H), 6.87 (d,  $J = 7.3$  Hz, 1H), 6.63 (t,  $J = 7.3$  Hz, 1H), 6.39 (d,  $J = 7.9$  Hz, 1H), 3.25 (s, 1H), 3.02 (d,  $J = 14.4$  Hz, 1H), 2.94 (d,  $J = 14.4$  Hz, 1H), 2.66 (s, 3H), 2.01 (d,  $J = 5.0$  Hz, 1H), 1.97 (td,  $J = 11.7, 4.2$  Hz, 1H), 1.61 (tt,  $J = 12.6, 4.7$  Hz, 1H), 1.41 (td,  $J = 12.1, 1.9$  Hz, 1H), 1.29 (td,  $J = 12.1, 5.0$  Hz, 1H), 1.26 (s, 3H).  **$^{13}\text{C}$  NMR** (150 MHz,  $\text{CDCl}_3$ )  $\delta$  215.28, 154.44, 138.78, 131.89, 130.66, 128.74, 128.67, 126.63, 124.23, 117.45, 106.32, 75.17, 53.15, 50.36, 48.38, 35.84, 35.68, 27.73, 22.48, 19.81. **FTIR** (film,  $\text{cm}^{-1}$ ) 3056.62, 3026.73, 2951.52, 2872.45, 2360.44, 2340.19, 1763.58, 1605.45, 1558.20, 1540.85. **HRMS** (ESI) calcd. for  $\text{C}_{22}\text{H}_{23}\text{NO}$  ( $m/z$   $\text{M}+\text{H}^+$ ): 318.1858, found 318.1858.

Ketone **13d** was also isolated as a colorless solid that was found to be approximately 95% pure as judged by  $^1\text{H}$  NMR spectroscopy (21 mg, 9%).  **$^1\text{H}$  NMR** (600 MHz,  $\text{CDCl}_3$ )  $\delta$  7.32 – 7.27 (m, 4H), 7.22 – 7.16 (m, 1H), 7.08 (t,  $J = 7.7$  Hz, 1H), 6.91 (d,  $J = 7.3$  Hz, 1H), 6.67 (t,  $J = 7.4$  Hz, 1H), 6.43 (d,  $J = 7.9$  Hz, 1H), 3.21 – 3.12 (m, 2H), 2.91 (s, 3H), 2.80 (d,  $J = 14.7$  Hz, 1H), 2.10 (d,  $J = 3.6$  Hz, 1H), 1.99 – 1.89 (m, 1H), 1.75 – 1.60 (m, 2H), 1.55 – 1.49 (m, 1H), 1.46 (s, 3H).  **$^{13}\text{C}$  NMR** (150 MHz,  $\text{CDCl}_3$ )  $\delta$  214.30, 152.30, 139.01, 135.33, 130.52, 128.90, 128.57, 126.36, 123.52, 118.70, 108.29, 80.90, 53.59, 50.31, 48.25, 38.96, 32.48, 25.39, 24.64, 18.70. **FTIR** (film,  $\text{cm}^{-1}$ ) 3061.44, 2970.80, 2924.52, 2881.13, 1759.73, 1602.56. **HRMS** (ESI) calcd. for  $\text{C}_{22}\text{H}_{23}\text{NO}$  ( $m/z$   $\text{M}+\text{H}^+$ ): 318.1858, found 318.1859.

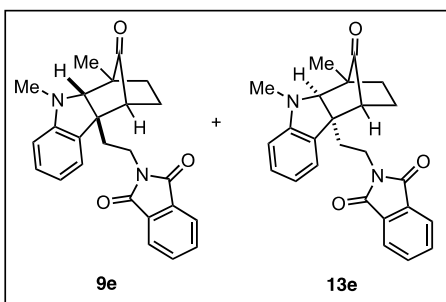

Following General Procedure E, a mixture of indole (100 mg, 0.329 mmol, 1.0 equiv), sodium carbonate (104 mg, 0.986 mmol, 3.0 equiv), and cyclopentanone **12a** (77 mg, 0.427 mmol, 1.3 equiv) in TFE (1.6 mL, 0.2 M) afforded ketone **9e** as a yellow oil that was found to be homogeneous as judged by  $^1\text{H NMR}$  spectroscopy (79.7 mg, 60%).  $^1\text{H NMR}$  (600 MHz,  $\text{CDCl}_3$ )  $\delta$  7.70 (dd,  $J = 5.4, 3.0$  Hz, 2H), 7.63 (dd,  $J = 5.4, 3.0$  Hz, 2H), 6.89 – 6.82 (m, 2H), 6.41 (t,  $J = 7.4$  Hz, 1H), 6.24 (d,  $J = 7.8$  Hz, 1H), 3.60 (s, 1H), 3.58 – 3.47 (m, 2H), 2.90 (s, 3H), 2.40 (td,  $J = 8.6, 5.3$  Hz, 1H), 1.99 (d,  $J = 4.8$  Hz, 1H), 1.93 – 1.84 (m, 1H), 1.65 – 1.52 (m, 3H), 1.36 – 1.28 (m, 2H), 1.20 (s, 3H).  $^{13}\text{C NMR}$  (150 MHz,  $\text{CDCl}_3$ )  $\delta$  215.58, 168.25, 154.04, 133.97, 132.35, 128.89, 128.39, 124.65, 123.28, 117.52, 105.92, 105.90, 73.78, 51.08, 50.31, 47.93, 36.90, 34.94, 33.83, 23.80, 19.53, 15.04. **FTIR** (film,  $\text{cm}^{-1}$ ) 3054.69, 2943.80, 2870.52, 1765.51, 1709.59, 1605.45, 1492.63. **HRMS** (ESI) calcd. for  $\text{C}_{25}\text{H}_{24}\text{N}_2\text{O}_3$  ( $m/z$   $\text{M}+\text{H}^+$ ): 401.1865, found 401.1867.

Ketone **13e** was also isolated as a yellow oil that was found to be approximately 95% pure as judged by  $^1\text{H NMR}$  spectroscopy (21 mg, 9%).  $^1\text{H NMR}$  (600 MHz,  $\text{CDCl}_3$ )  $\delta$  7.79 (dd,  $J = 5.4, 3.0$  Hz, 2H), 7.70 (dd,  $J = 5.4, 5.3$  Hz, 3H), 7.02 – 6.96 (m, 2H), 6.60 (t,  $J = 7.4$  Hz, 1H), 6.29 (d,  $J = 8.2$  Hz, 1H), 3.57 (td,  $J = 10.9, 4.2$  Hz, 1H), 3.43 (ddd,  $J = 13.8, 10.2, 6.4$  Hz, 1H), 3.29 (s, 1H), 2.90 (s, 3H), 2.26 (ddd,  $J = 13.3, 10.9, 6.4$  Hz, 1H), 2.18 (d,  $J = 3.9$  Hz, 1H), 2.06 – 1.94 (m, 3H), 1.83 – 1.73 (m, 1H), 1.73 – 1.65 (m, 2H), 1.09 (s, 3H).  $^{13}\text{C NMR}$  (150 MHz,  $\text{CDCl}_3$ )  $\delta$  214.68, 168.41, 152.26, 134.25, 132.42, 130.80, 129.32, 124.25, 123.50, 123.47, 123.27, 118.37, 107.36, 78.06, 50.58, 49.85, 48.95, 36.97, 35.12, 34.27, 28.26, 18.26, 11.85. **FTIR** (film,  $\text{cm}^{-1}$ ) 3407.60, 3055.66, 2929.34, 2870.52, 1769.37, 1713.44, 1604.48, 1491.67. **HRMS** (ESI) calcd. for  $\text{C}_{25}\text{H}_{21}\text{N}_2\text{O}_3$  ( $m/z$   $\text{M}+\text{H}^+$ ): 401.1865, found 401.1863.

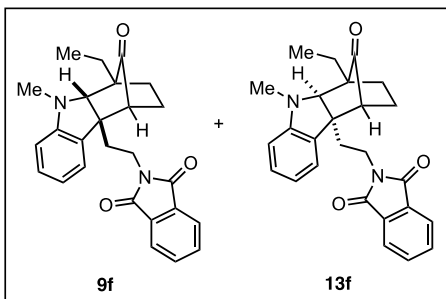

Following General Procedure E, a mixture of indole (100 mg, 0.329 mmol, 1.0 equiv), sodium carbonate (104 mg, 0.986 mmol, 3.0 equiv), and cyclopentanone **12b** (81 mg, 0.427 mmol, 1.3 equiv) in TFE (1.6 mL, 0.2 M) afforded ketone **9f** as a yellow oil that was found to be homogeneous as judged by  $^1\text{H NMR}$  spectroscopy (105 mg, 77%).  $^1\text{H NMR}$  (600 MHz,  $\text{CDCl}_3$ )  $\delta$  7.70 (dd,  $J = 5.4, 3.1$  Hz, 2H), 7.64 (dd,  $J = 5.5, 3.0$  Hz, 2H), 6.91 – 6.82 (m, 2H), 6.43 (t,  $J = 7.4$  Hz, 1H), 6.27 (d,  $J = 7.8$  Hz, 1H), 3.76 (s, 1H), 3.58 – 3.46 (m, 2H), 2.89 (s, 3H), 2.37 (dt,  $J = 8.6, 5.5$  Hz, 1H), 1.95 (d,  $J = 4.8$  Hz, 1H), 1.81 (td,  $J = 7.2, 5.0$  Hz, 1H), 1.76 – 1.54 (m, 5H), 1.44 (td,  $J = 12.2, 1.9$  Hz, 1H), 1.32 (td,  $J = 11.2, 4.5$  Hz, 1H), 1.06 (t,  $J = 7.5$  Hz, 3H).  $^{13}\text{C NMR}$  (150 MHz,  $\text{CDCl}_3$ )  $\delta$  215.58, 168.24, 154.60, 133.97, 132.37, 128.83, 128.36, 124.64, 123.28, 117.47, 106.11, 71.23, 51.67, 50.86, 50.65, 36.86, 35.24, 33.84, 22.19, 21.49, 19.37, 9.53. **FTIR** (film,  $\text{cm}^{-1}$ ) 3054.69, 2963.09, 2926.45, 2877.27, 2796.28, 1763.58, 1711.51, 1605.45. **HRMS** (ESI) calcd. for  $\text{C}_{26}\text{H}_{26}\text{N}_2\text{O}_3$  ( $m/z$   $\text{M}+\text{H}^+$ ): 415.2022, found 415.2014.

Ketone **13f** was also isolated as a yellow oil that was found to be homogeneous as judged by  $^1\text{H NMR}$  spectroscopy (15 mg, 11%).  $^1\text{H NMR}$  (600 MHz,  $\text{CDCl}_3$ )  $\delta$  7.79 (dd,  $J = 5.4, 3.0$  Hz, 2H), 7.69 (dd,  $J = 5.5, 3.0$  Hz, 2H), 7.02 – 6.96 (m, 2H), 6.60 (t,  $J = 7.4$  Hz, 1H), 6.32 (d,  $J = 8.1$  Hz, 1H), 3.58 (td,  $J = 10.9, 4.3$  Hz, 1H), 3.43 (ddd,  $J = 13.9, 10.3, 6.5$  Hz, 1H), 3.36 (s, 1H), 2.92 (s, 3H), 2.27 (ddd,  $J = 13.2, 10.9, 6.4$  Hz, 1H), 2.16 (d,  $J = 3.5$  Hz, 1H), 2.04 – 1.95 (m, 2H), 1.82 – 1.69 (m, 3H), 1.68 – 1.51 (m, 6H), 0.98 (t,  $J = 7.6$  Hz, 4H).  $^{13}\text{C NMR}$  (150 MHz,  $\text{CDCl}_3$ )  $\delta$  214.50, 168.43, 152.59, 134.26, 132.43, 130.87, 129.26, 124.20, 123.47, 118.54, 107.74, 76.48, 52.66, 50.48, 50.33, 37.36, 35.11, 34.31, 24.60, 18.41, 18.09, 9.34. **FTIR** (film,  $\text{cm}^{-1}$ ) 3054.69, 2964.05, 2937.06, 2879.20, 2822.31, 1766.48, 1710.55, 1603.52. **HRMS** (ESI) calcd. for  $\text{C}_{26}\text{H}_{26}\text{N}_2\text{O}_3$  ( $m/z$   $\text{M}+\text{H}^+$ ): 415.2022, found 415.2016.

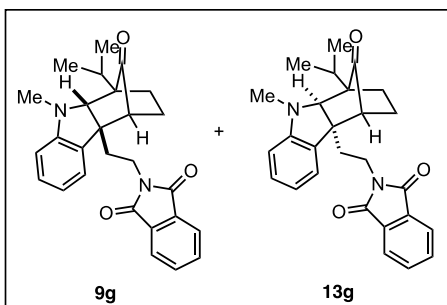

Following General Procedure E, a mixture of indole (100 mg, 0.329 mmol, 1.0 equiv), sodium carbonate (104 mg, 0.986 mmol, 3.0 equiv), and cyclopentanone **12c** (87 mg, 0.427 mmol, 1.3 equiv) in TFE (1.6 mL, 0.2 M) afforded ketone **9g** as a yellow oil that was found to be homogeneous as judged by  $^1\text{H}$  NMR spectroscopy (106 mg, 75%).  $^1\text{H}$  NMR (600 MHz,  $\text{CDCl}_3$ )  $\delta$  7.72 (dd,  $J = 5.4, 3.1$  Hz, 2H), 7.64 (dd,  $J = 5.5, 3.0$  Hz, 2H), 6.93 (t,  $J = 1.3$  Hz, 1H), 6.87 (d,  $J = 1.3$  Hz, 1H), 6.49 (t,  $J = 1.0$  Hz, 1H), 6.36 (d,  $J = 7.9$  Hz, 1H), 3.94 (s, 1H), 3.55 – 3.45 (m, 2H), 2.92 (s, 3H), 2.34 (dt,  $J = 14.0, 5.1$  Hz, 1H), 2.02 – 1.90 (m, 3H), 1.62 – 1.52 (m, 2H), 1.46 (td,  $J = 12.2, 2.0$  Hz, 1H), 1.32 – 1.23 (m, 1H), 1.15 – 1.07 (apparent triplet, 6H).  $^{13}\text{C}$  NMR (150 MHz,  $\text{CDCl}_3$ )  $\delta$  215.48, 168.24, 155.57, 134.02, 132.38, 128.83, 128.63, 124.56, 123.32, 118.09, 107.52, 69.63, 54.83, 51.17, 50.67, 37.11, 36.90, 33.92, 27.38, 21.58, 19.23, 19.14, 19.06. FTIR (film,  $\text{cm}^{-1}$ ) 3054.69, 2963.09, 2926.45, 2877.27, 2796.28, 1763.58, 1711.51, 1605.45. HRMS (ESI) calcd. for  $\text{C}_{27}\text{H}_{28}\text{N}_2\text{O}_3$  ( $m/z$   $\text{M}+\text{H}^+$ ): 429.2178, found 429.2176.

Ketone **13g** was also isolated as a yellow oil that was found to be homogeneous as judged by  $^1\text{H}$  NMR spectroscopy (12 mg, 9%).  $^1\text{H}$  NMR (600 MHz,  $\text{CDCl}_3$ )  $\delta$  7.79 (dd,  $J = 5.4, 3.0$  Hz, 2H), 7.69 (dd,  $J = 5.5, 3.0$  Hz, 2H), 7.01 – 6.95 (m, 2H), 6.61 (t,  $J = 7.4, 1.0$  Hz, 1H), 6.36 (d,  $J = 7.9$  Hz, 1H), 3.60 – 3.53 (m, 1H), 3.47 – 3.40 (m, 1H), 3.39 (s, 1H), 2.94 (s, 3H), 2.32 – 2.19 (m, 2H), 2.08 (d,  $J = 3.6$  Hz, 1H), 2.04 – 1.89 (m, 3H), 1.75 – 1.66 (m, 1H), 1.47 – 1.38 (m, 1H), 1.01 (d,  $J = 6.8$  Hz, 3H), 0.97 (d,  $J = 6.9$  Hz, 3H).  $^{13}\text{C}$  NMR (150 MHz,  $\text{CDCl}_3$ )  $\delta$  213.69, 168.41, 153.18, 134.25, 132.41, 130.95, 129.15, 124.12, 123.46, 118.82, 108.33, 76.52, 55.76, 50.98, 50.11, 38.33, 35.07, 34.27, 30.04, 23.36, 20.63, 19.41, 18.08, 16.91. FTIR (film,  $\text{cm}^{-1}$ ) 3054.69, 2964.05, 2937.06, 2879.20, 2822.31, 1766.48, 1710.55, 1603.52. HRMS (ESI) calcd. for  $\text{C}_{26}\text{H}_{26}\text{N}_2\text{O}_3$  ( $m/z$   $\text{M}+\text{H}^+$ ): 429.2178, found 429.2176.

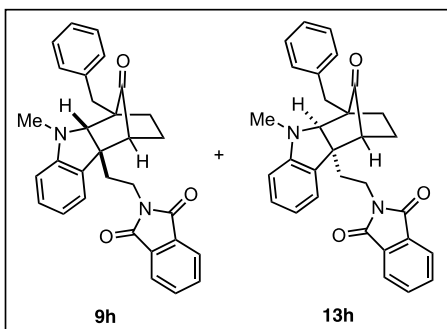

Following General Procedure E, a mixture of indole (100 mg, 0.329 mmol, 1.0 equiv), sodium carbonate (104 mg, 0.986 mmol, 3.0 equiv), and cyclopentanone **12d** (108 mg, 0.427 mmol, 1.3 equiv) in TFE (1.6 mL, 0.2 M) afforded ketone **9h** as a colorless oil that was found to be approximately 95% pure as judged by  $^1\text{H}$  NMR spectroscopy (97.2 mg, 62%).  $^1\text{H}$  NMR (600 MHz,  $\text{CDCl}_3$ )  $\delta$  7.68 (dd,  $J = 8.5, 2.7$  Hz, 2H), 7.63 (dd,  $J = 5.3, 3.5$  Hz, 2H), 7.34 – 7.28 (m, 4H), 7.23 – 7.19 (m, 1H), 6.88 – 6.80 (m, 2H), 6.41 (t,  $J = 1.0$  Hz, 1H), 6.26 (d,  $J = 7.9$  Hz, 1H), 3.66 (s, 1H), 3.50 – 3.38 (m, 2H), 3.06 – 2.96 (m, 2H), 2.71 (s, 3H), 2.36 (dt,  $J = 14.2, 8.5$  Hz, 1H), 1.99 (d,  $J = 4.9$  Hz, 1H), 1.93 (td,  $J = 11.2, 4.5$  Hz, 1H), 1.60 (ddd,  $J = 13.8, 6.9, 4.7$  Hz, 1H), 1.54 (dt,  $J = 12.4, 4.7$  Hz, 1H), 1.40 (td,  $J = 12.2, 1.9$  Hz, 1H), 1.28 (td,  $J = 11.3, 4.9$  Hz, 1H).  $^{13}\text{C}$  NMR (150 MHz,  $\text{CDCl}_3$ )  $\delta$  215.07, 168.16, 154.56, 138.58, 133.93, 132.32, 130.67, 128.81, 128.72, 128.18, 126.70, 124.43, 123.25, 117.71, 106.52, 71.35, 52.99, 51.19, 50.45, 36.34, 35.77, 35.53, 33.75, 22.29, 19.32. FTIR (film,  $\text{cm}^{-1}$ ) 2957.30, 2925.48, 2869.56, 1766.48, 1738.51. HRMS (ESI) calcd. for  $\text{C}_{31}\text{H}_{28}\text{N}_2\text{O}_3$  ( $m/z$   $\text{M}+\text{H}^+$ ): 477.2178, found 477.2174.

Ketone **13h** was also isolated as a colorless oil that was found to be approximately 95% pure as judged by  $^1\text{H}$  NMR spectroscopy (22.3 mg, 14%).  $^1\text{H}$  NMR (600 MHz,  $\text{CDCl}_3$ )  $\delta$  7.80 (dd,  $J = 5.4, 3.0$  Hz, 2H), 7.70 (dd,  $J = 5.5, 3.0$  Hz, 2H), 7.33 – 7.25 (m, 4H), 7.22 – 7.17 (m, 1H), 7.06 – 6.99 (m, 2H), 6.66 (d,  $J = 1.0$  Hz, 1H), 6.39 (d,  $J = 7.9$  Hz, 1H), 3.57 (ddd,  $J = 14.0, 11.0, 4.2$  Hz, 1H), 3.47 – 3.39 (m, 2H), 3.20 (d,  $J = 14.7$  Hz, 1H), 2.96 (s, 3H), 2.78 (d,  $J = 14.7$  Hz, 1H), 2.27 (ddd,  $J = 13.3, 11.0, 6.4$  Hz, 1H), 2.19 (d,  $J = 3.6$  Hz, 1H), 2.05 – 1.99 (m, 1H), 1.96 (td,  $J = 10.7, 2.4$  Hz, 1H), 1.70 (td,  $J = 11.9, 2.4$  Hz, 1H), 1.67 – 1.58 (m, 1H), 1.54 (ddd,  $J = 12.1, 10.7, 6.4$  Hz, 1H).  $^{13}\text{C}$  NMR (150 MHz,  $\text{CDCl}_3$ )  $\delta$  213.41, 168.41, 152.79, 138.79, 134.28, 132.41, 131.00, 130.59, 129.36, 128.61, 126.40, 124.23, 123.48, 118.96, 108.34, 78.47, 53.20, 50.83, 50.21, 38.32, 35.13, 34.26, 32.31, 24.62, 18.25. FTIR (film,  $\text{cm}^{-1}$ ) 2957.30, 2926.45, 2870.52, 1770.33, 1734.66. HRMS (ESI) calcd. for  $\text{C}_{31}\text{H}_{28}\text{N}_2\text{O}_3$  ( $m/z$   $\text{M}+\text{H}^+$ ): 477.2178, found 477.2179.

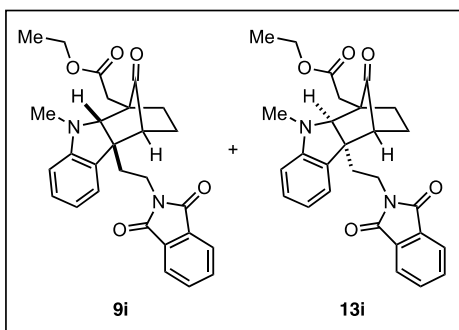

Following General Procedure E, a mixture of indole (100 mg, 0.329 mmol, 1.0 equiv), sodium carbonate (104 mg, 0.986 mmol, 3.0 equiv), and cyclopentanone **12e** (106 mg, 0.427 mmol, 1.3 equiv) in TFE (1.6 mL, 0.2 M) afforded ketone **9i** as a yellow oil that was found to be homogeneous as judged by  $^1\text{H NMR}$  spectroscopy (126 mg, 81%).  $^1\text{H NMR}$  (600 MHz,  $\text{CDCl}_3$ )  $\delta$  7.67 (dd,  $J = 5.4, 3.1$  Hz, 2H), 7.62 (dd,  $J = 5.5, 3.0$  Hz, 2H), 6.85 – 6.76 (m, 2H), 6.37 (t,  $J = 0.9$  Hz, 1H), 6.25 (d,  $J = 7.8$  Hz, 1H), 4.25 – 4.13 (m, 2H), 3.98 (s, 1H), 3.63 (dt,  $J = 14.1, 8.2$  Hz, 1H), 3.52 (ddd,  $J = 14.1, 8.5, 3.9$  Hz, 1H), 2.87 (s, 3H), 2.65 (d,  $J = 16.4$  Hz, 1H), 2.59 (d,  $J = 16.4$  Hz, 1H), 2.43 (dt,  $J = 14.2, 8.6$  Hz, 1H), 2.02 (d,  $J = 4.5$  Hz, 1H), 1.97 (td,  $J = 11.0, 3.4$  Hz, 1H), 1.73

– 1.54 (m, 3H), 1.35 – 1.26 (m, 4H).  $^{13}\text{C NMR}$  (150 MHz,  $\text{CDCl}_3$ )  $\delta$  212.97, 171.38, 168.21, 168.20, 154.51, 133.86, 132.34, 128.79, 128.14, 124.44, 123.19, 117.54, 106.27, 71.89, 60.91, 51.33, 49.94, 49.54, 36.29, 35.27, 34.22, 33.80, 22.38, 19.32, 14.55. **FTIR** (film,  $\text{cm}^{-1}$ ) 3054.69, 2979.48, 2938.98, 2873.42, 2255.34, 1769.37, 1712.48, 1605.45. **HRMS** (ESI) calcd. for  $\text{C}_{28}\text{H}_{28}\text{N}_2\text{O}_5$  ( $m/z$   $\text{M}+\text{H}^+$ ): 473.2076, found: 473.2076.

Ketone **13i** was also isolated as a yellow oil that was found to be homogeneous as judged by  $^1\text{H NMR}$  spectroscopy (17 mg, 11%).  $^1\text{H NMR}$  (600 MHz,  $\text{CDCl}_3$ )  $\delta$  7.79 (dd,  $J = 5.4, 3.0$  Hz, 2H), 7.69 (dd,  $J = 5.5, 3.0$  Hz, 2H), 7.03 – 6.96 (m, 2H), 6.63 (t,  $J = 0.9$  Hz, 1H), 6.36 (d,  $J = 7.0$  Hz, 1H), 4.18 (q,  $J = 7.1, 1.2$  Hz, 2H), 3.67 – 3.56 (m, 2H), 3.45 (ddd,  $J = 13.7, 10.1, 6.2$  Hz, 1H), 2.92 (s, 3H), 2.74 (d,  $J = 17.0$  Hz, 1H), 2.46 (d,  $J = 16.9$  Hz, 1H), 2.27 (ddd,  $J = 13.4, 10.7, 6.2$  Hz, 1H), 2.22 (d,  $J = 3.7$  Hz, 1H), 2.10 – 2.00 (m, 2H), 1.93 (ddd,  $J = 12.0, 10.6, 6.2$  Hz, 1H), 1.88 – 1.75 (m, 2H), 1.30 (t,  $J = 7.1$  Hz, 3H).  $^{13}\text{C NMR}$  (150 MHz,  $\text{CDCl}_3$ )  $\delta$  212.48, 172.39, 168.35, 152.69, 134.23, 132.40, 130.99, 129.38, 124.27, 123.46, 119.06, 108.61, 76.28, 60.84, 50.99, 49.90, 49.54, 37.63, 35.02, 34.25, 31.38, 25.53, 18.13, 14.61. **FTIR** (film,  $\text{cm}^{-1}$ ) 3055.66, 2980.45, 2938.02, 2822.31, 1770.33, 1711.51, 1604.48.

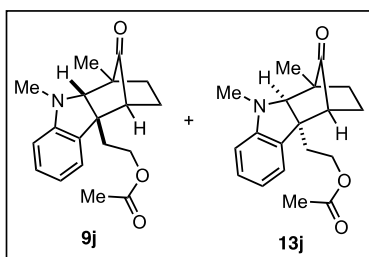

Following General Procedure E, a mixture of indole (100 mg, 0.460 mmol, 1.0 equiv), sodium carbonate (146 mg, 1.38 mmol, 3.0 equiv), and cyclopentanone **12a** (105 mg, 0.598 mmol, 1.3 equiv) in TFE (2.3 mL, 0.2 M) afforded ketone **9j** as a colorless oil that was found to be homogeneous as judged by  $^1\text{H NMR}$  spectroscopy (110 mg, 76%).  $^1\text{H NMR}$  (600 MHz,  $\text{CDCl}_3$ )  $\delta$  7.11 (d,  $J = 7.7$  Hz, 1H), 6.85 (d,  $J = 7.3$  Hz, 1H), 6.63 (t,  $J = 7.4$  Hz, 1H), 6.40 (d,  $J = 7.9$  Hz, 1H), 3.98 (ddd,  $J = 11.3, 8.6, 5.4$  Hz, 1H), 3.85 (ddd,  $J = 11.3, 8.1, 6.5$  Hz, 1H), 3.43 (s, 1H), 2.87 (s, 3H), 2.14 – 2.04 (m, 2H), 1.91 (s, 3H), 1.90 – 1.86 (m, 1H), 1.82 –

1.73 (m, 1H), 1.67 – 1.58 (m, 1H), 1.38 – 1.29 (m, 2H), 1.17 (s, 3H).  $^{13}\text{C NMR}$  (150 MHz,  $\text{CDCl}_3$ )  $\delta$  215.57, 171.13, 154.29, 129.26, 128.81, 124.87, 117.54, 106.20, 74.80, 61.08, 50.88, 49.92, 47.90, 38.43, 35.12, 23.57, 21.16, 19.85, 15.02. **FTIR** (film,  $\text{cm}^{-1}$ ) 2957.30, 2925.48, 2869.56, 1766.48, 1738.51. **HRMS** (ESI) calcd. for  $\text{C}_{19}\text{H}_{23}\text{NO}_3$  ( $m/z$   $\text{M}+\text{H}^+$ ): 314.1756, found 314.1758.

Ketone **13j** was also isolated as a colorless oil that was found to be homogeneous as judged by  $^1\text{H NMR}$  spectroscopy (27 mg, 19%).  $^1\text{H NMR}$  (600 MHz,  $\text{CDCl}_3$ )  $\delta$  7.04 (t,  $J = 7.7$  Hz, 1H), 6.87 (d,  $J = 7.4$  Hz, 1H), 6.61 (t,  $J = 7.4$  Hz, 1H), 6.31 (d,  $J = 7.9$  Hz, 1H), 4.03 (ddd,  $J = 11.2, 8.5, 5.7$  Hz, 1H), 3.91 (ddd,  $J = 11.2, 8.1, 6.5$  Hz, 1H), 3.18 (s, 1H), 2.87 (s, 3H), 2.19 (d,  $J = 4.0$  Hz, 1H), 2.17 – 2.04 (m, 2H), 2.04 – 1.96 (m, 4H), 1.85 – 1.77 (m, 1H), 1.71 – 1.61 (m, 2H), 1.06 (s, 3H).  $^{13}\text{C NMR}$  (150 MHz,  $\text{CDCl}_3$ )  $\delta$  214.69, 171.22, 152.13, 131.02, 129.44, 124.29, 118.13, 107.40, 78.71, 61.39, 50.32, 49.77, 48.78, 36.96, 35.66, 28.37, 21.31, 18.29, 11.74. **FTIR** (film,  $\text{cm}^{-1}$ ) 2957.30, 2926.45, 2870.52, 1770.33, 1734.66. **HRMS** (ESI) calcd. for  $\text{C}_{19}\text{H}_{23}\text{NO}_3$  ( $m/z$   $\text{M}+\text{H}^+$ ): 314.1756, found 314.1755.

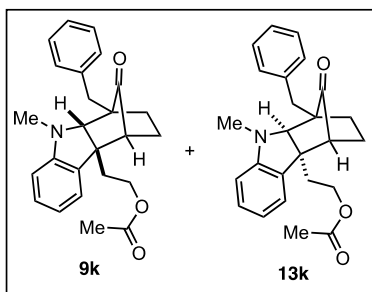

Following General Procedure E, a mixture of indole (100 mg, 0.460 mmol, 1.0 equiv), sodium carbonate (146 mg, 1.38 mmol, 3.0 equiv), and cyclopentanone **12d** (151 mg, 0.598 mmol, 1.3 equiv) in TFE (2.3 mL, 0.2 M) afforded ketone **9k** as a colorless oil that was found to be homogeneous as judged by  $^1\text{H}$  NMR spectroscopy (129 mg, 71%).  $^1\text{H}$  NMR (600 MHz,  $\text{CDCl}_3$ )  $\delta$  7.33 – 7.26 (m, 4H), 7.24 – 7.18 (m, 1H), 7.10 (t,  $J = 7.7$  Hz, 1H), 6.83 (d,  $J = 7.3$  Hz, 1H), 6.64 (t,  $J = 7.4$  Hz, 1H), 6.42 (d,  $J = 7.9$  Hz, 1H), 3.84 (t,  $J = 1.4$  Hz, 2H), 3.50 (s, 1H), 3.00 (d,  $J = 14.4$  Hz, 1H), 2.96 (d,  $J = 14.1$  Hz, 1H), 2.68 (s, 3H), 2.08 – 2.00 (m, 2H), 1.95 (td,  $J = 11.1$ , 4.7 Hz, 1H), 1.83 (s, 3H), 1.75 (dt,  $J = 14.0$ , 6.9 Hz, 1H), 1.63 – 1.54 (m, 1H), 1.41 (td,  $J = 12.0$ , 1.9 Hz, 1H), 1.32 (td,  $J = 11.2$ , 4.7 Hz, 1H).  $^{13}\text{C}$  NMR (150 MHz,  $\text{CDCl}_3$ )  $\delta$  215.05, 171.04, 154.74, 138.60, 130.68, 129.22, 128.76, 128.74, 126.74, 124.70, 118.02, 107.13, 72.14, 61.06, 53.03, 51.16, 50.17, 37.89, 36.02, 35.70, 22.32, 21.08, 19.67. FTIR (film,  $\text{cm}^{-1}$ ) 3507.88, 3458.71, 3058.55, 2926.45, 2874.38, 2794.35, 1763.58, 1738.51, 1604.48. HRMS (ESI) calcd. for  $\text{C}_{25}\text{H}_{27}\text{NO}_3$  ( $m/z$   $\text{M}+\text{H}^+$ ): 390.2069, found 390.2072.

Ketone **13k** was also isolated as a colorless oil that was found to be homogeneous as judged by  $^1\text{H}$  NMR spectroscopy (12 mg, 6%).  $^1\text{H}$  NMR (600 MHz,  $\text{CDCl}_3$ )  $\delta$  7.32 – 7.22 (m, 5H), 7.20 – 7.15 (m, 1H), 7.06 (t,  $J = 7.7$  Hz, 1H), 6.88 (d,  $J = 7.4$  Hz, 1H), 6.65 (t,  $J = 6.6$  Hz, 1H), 6.39 (d,  $J = 7.9$  Hz, 1H), 4.01 (ddd,  $J = 11.2$ , 8.6, 5.7 Hz, 1H), 3.89 (ddd,  $J = 11.1$ , 8.2, 6.4 Hz, 1H), 3.31 (s, 1H), 3.14 (d,  $J = 14.7$  Hz, 1H), 2.89 (s, 3H), 2.74 (d,  $J = 14.7$  Hz, 1H), 2.17 (d,  $J = 3.6$  Hz, 1H), 2.15 – 2.03 (m, 2H), 2.00 – 1.92 (m, 4H), 1.73 – 1.61 (m, 2H), 1.54 – 1.47 (m, 1H).  $^{13}\text{C}$  NMR (150 MHz,  $\text{CDCl}_3$ )  $\delta$  213.43, 171.18, 152.70, 138.80, 131.26, 130.54, 129.45, 128.58, 126.41, 124.24, 118.78, 108.51, 79.00, 61.34, 52.94, 50.55, 50.14, 38.44, 35.69, 32.20, 24.84, 21.29, 18.27. FTIR (film,  $\text{cm}^{-1}$ ) 3026.73, 2918.73, 1844.58, 1769.37, 1735.62. HRMS (ESI) calcd. for  $\text{C}_{25}\text{H}_{27}\text{NO}_3$  ( $m/z$   $\text{M}+\text{H}^+$ ): 390.2069, found 390.2069.

#### F. Annulation Reactions with Dibrominated Ketones:

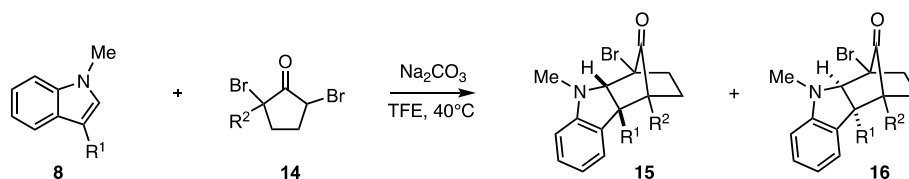

#### General Procedure F:

To a solution of indole **8** (1.0 equiv) in trifluoroethanol (0.2 M) was sequentially added sodium carbonate (3.0 equiv) and 2,5-dibromocyclopentanone **14** (2.0 equiv). The reaction mixture was stirred at 40 °C until the reaction was judged complete as determined by thin-layer chromatographic analysis and then cooled to room temperature. The mixture was filtered through a short pad of silica gel and washed with EtOAc. The filtrate was concentrated and the residue was purified via silica gel flash column chromatography (hexanes/EtOAc) to afford **15** as the major product and diastereomer **16** as the minor product.

#### Modified General Procedure F:

To a solution of indole **8** (1.0 equiv) in hexafluoroisopropanol (0.2 M) was sequentially added sodium carbonate (3.0 equiv) and 2,5-dibromocyclopentanone **14** (2.0 equiv). The reaction mixture was stirred at room temperature for 40 hours. Then an additional 2.0 equiv of **14** was added and the reaction continued to stir for an additional 20 hours (Total reaction time 60 hours). When the reaction was judged complete as determined by thin-layer chromatographic analysis the mixture was filtered through a short pad of silica gel and washed with EtOAc. The filtrate was concentrated and the residue was purified via silica gel flash column chromatography (hexanes/EtOAc) to afford **15** as the major product and diastereomer **16** as the minor product.

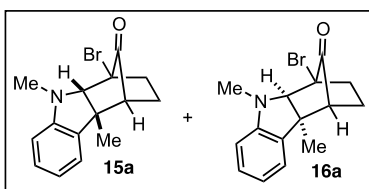

Following General Procedure F, a mixture of indole (100 mg, 0.689 mmol, 1.0 equiv), sodium carbonate (219 mg, 2.06 mmol, 3.0 equiv), and cyclopentanone **14f** (333 mg, 1.37 mmol, 2.0 equiv) in TFE (3.4 mL, 0.2 M) afforded ketone **15a** as a colorless oil that was found to be homogeneous as judged by  $^1\text{H}$  NMR spectroscopy (142 mg, 67%).  $^1\text{H}$  NMR (600 MHz,  $\text{CDCl}_3$ )  $\delta$  7.15 (t,  $J = 7.7$  Hz, 1H), 6.87 (d,  $J = 7.3$  Hz, 1H), 6.66 (t,  $J = 7.4$  Hz, 1H), 6.46 (d,  $J = 7.9$  Hz, 1H), 3.72 (d,  $J = 2.0$  Hz, 1H), 2.99 (s, 3H), 2.40 (td,  $J = 11.2, 4.2$  Hz, 1H), 2.07 (d,  $J = 5.0$  Hz, 1H), 1.89 (td,  $J = 12.2, 2.0$  Hz, 1H), 1.84 – 1.76 (m, 1H), 1.47 (td,  $J = 11.2, 4.8$  Hz, 1H), 1.38 (s, 3H).  $^{13}\text{C}$  NMR (150 MHz,  $\text{CDCl}_3$ )  $\delta$  206.54, 153.65, 130.84, 129.31, 124.22, 117.89, 106.28, 78.75, 63.72, 50.80, 45.81, 34.93, 28.19, 26.50, 21.77. FTIR (film,  $\text{cm}^{-1}$ ) 2983.34, 2957.52, 2886.92, 1774.19, 1603.52, 1488.78. HRMS (ESI) calcd. for  $\text{C}_{15}\text{H}_{16}\text{BrNO}$  ( $m/z$   $\text{M}+\text{H}^+$ ): 306.0494; found 306.0488.

Ketone **16a** was also isolated as a colorless oil that was found to be homogeneous as judged by  $^1\text{H}$  NMR spectroscopy (12 mg, 6%).  $^1\text{H}$  NMR (600 MHz,  $\text{CDCl}_3$ )  $\delta$  7.07 (t,  $J = 7.7$  Hz, 1H), 6.87 (d,  $J = 7.3$  Hz, 1H), 6.65 (t,  $J = 7.4$  Hz, 1H), 6.38 (d,  $J = 7.9$  Hz, 1H), 3.30 (s, 1H), 3.00 (s, 3H), 2.29 (td,  $J = 11.9, 8.8$  Hz, 1H), 2.23 – 2.16 (m, 2H), 2.13 (td,  $J = 10.5, 3.0$  Hz, 1H), 2.05 – 1.96 (m, 1H), 1.52 (s, 3H).  $^{13}\text{C}$  NMR (150 MHz,  $\text{CDCl}_3$ )  $\delta$  205.86, 151.45, 133.68, 129.32, 123.31, 118.68, 107.94, 80.12, 66.49, 50.47, 45.85, 38.13, 31.28, 25.20, 20.76. FTIR (film,  $\text{cm}^{-1}$ ) 2965.98, 2922.59, 2888.84, 1778.05, 1601.59, 1491.67. HRMS (ESI) calcd. for  $\text{C}_{15}\text{H}_{16}\text{BrNO}$  ( $m/z$   $\text{M}+\text{H}^+$ ): 306.0494; found 306.0489.

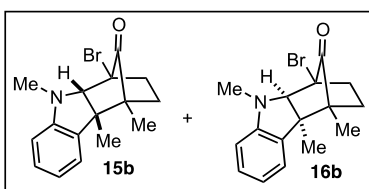

Following General Procedure F, a mixture of indole (200 mg, 1.37 mmol, 1.0 equiv), sodium carbonate (438 mg, 4.11 mmol, 3.0 equiv), and cyclopentanone **14a** (705 mg, 2.75 mmol, 2.0 equiv) in TFE (6.4 mL, 0.2 M) afforded ketone **15b** as a light blue solid that was found to be homogeneous as judged by  $^1\text{H}$  NMR spectroscopy. Nitrogen gas was blown over the isolated material for ~24 h to volatilize remaining impurities. (356 mg, 81%).  $^1\text{H}$  NMR (600 MHz,  $\text{CDCl}_3$ )  $\delta$  7.15 (t,  $J = 7.7$  Hz, 1H), 6.90 (d,  $J = 7.3$  Hz, 1H), 6.65 (t,  $J = 7.4$  Hz, 1H), 6.46 (d,  $J = 7.9$  Hz, 1H), 3.71 (s, 1H), 2.99 (s, 3H), 2.44 (td,  $J = 11.1, 4.3$  Hz, 1H), 1.92 (td,  $J = 12.3, 2.0$  Hz, 1H), 1.65 – 1.54 (m, 2H), 1.49 (td,  $J = 12.7, 4.3$  Hz, 1H), 1.25 (s, 3H), 1.16 (s, 3H).  $^{13}\text{C}$  NMR (150 MHz,  $\text{CDCl}_3$ )  $\delta$  208.39, 153.51, 130.97, 129.26, 123.86, 117.68, 106.12, 79.11, 63.61, 52.33, 45.61, 34.84, 29.69, 27.60, 26.13, 11.97. FTIR (film,  $\text{cm}^{-1}$ ) 3025.76, 2961.16, 2869.56, 2823.28, 1785.76, 1605.45. HRMS (ESI) calcd. for  $\text{C}_{16}\text{H}_{18}\text{BrNO}$  ( $m/z$   $\text{M}+\text{H}^+$ ): 320.0650, found 320.0647.

Ketone **16b** was also isolated as a light blue solid that was found to be homogeneous as judged by  $^1\text{H}$  NMR spectroscopy. Nitrogen gas was blown over the isolated material for ~24 h to volatilize remaining impurities. (19 mg, 4%).  $^1\text{H}$  NMR (600 MHz,  $\text{CDCl}_3$ )  $\delta$  7.06 (t,  $J = 7.7$  Hz, 1H), 6.87 (d,  $J = 7.5$  Hz, 1H), 6.63 (t,  $J = 7.4$  Hz, 1H), 6.38 (d,  $J = 8.0$  Hz, 1H), 3.35 (s, 1H), 2.97 (s, 3H), 2.35 – 2.27 (m, 1H), 2.26 – 2.15 (m, 2H), 1.77 – 1.68 (m, 1H), 1.50 (s, 3H), 1.11 (s, 3H).  $^{13}\text{C}$  NMR (150 MHz,  $\text{CDCl}_3$ )  $\delta$  207.94, 152.41, 132.02, 129.12, 125.19, 118.11, 108.28, 80.57, 66.37, 52.59, 45.05, 38.99, 31.21, 28.43, 24.03, 12.07. FTIR (film,  $\text{cm}^{-1}$ ) 3049.87, 2973.70, 2883.06, 2822.31, 1786.72, 1603.52. HRMS (ESI) calcd. for  $\text{C}_{16}\text{H}_{18}\text{BrNO}$  ( $m/z$   $\text{M}+\text{H}^+$ ): 320.0650, found 320.0648.

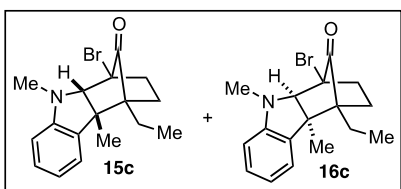

Following General Procedure F, a mixture of indole (100 mg, 0.689 mmol, 1.0 equiv), sodium carbonate (219 mg, 2.06 mmol, 3.0 equiv), and cyclopentanone **14b** (371 mg, 1.37 mmol, 2.0 equiv) in TFE (3.4 mL, 0.2 M) afforded ketone **13-2a** as a white solid that was found to be homogeneous as judged by  $^1\text{H}$  NMR spectroscopy (168 mg, 73%).  $^1\text{H}$  NMR (600 MHz,  $\text{CDCl}_3$ )  $\delta$  7.14 (t,  $J = 7.7$  Hz, 1H), 6.91 (d,  $J = 7.3$  Hz, 1H), 6.63 (t,  $J = 7.4$  Hz, 1H), 6.46 (d,  $J = 7.9$  Hz, 1H), 3.66 (s, 1H), 2.98 (s, 3H), 2.47 (td,  $J = 11.6, 3.8$  Hz, 1H), 1.96 – 1.87 (m, 2H), 1.81 (td,  $J = 12.6, 3.8$  Hz, 1H), 1.52 (dq,  $J = 14.9, 7.5$  Hz, 1H), 1.42 (td,  $J = 11.2, 5.4$  Hz, 1H), 1.26 (s, 3H), 0.96 (t,  $J = 7.5$  Hz, 3H).  $^{13}\text{C}$  NMR (150 MHz,  $\text{CDCl}_3$ )  $\delta$  207.86, 153.63, 130.96, 129.15, 124.44, 117.57, 106.06, 79.16, 63.80, 53.15, 49.03, 34.85, 27.41, 25.91, 24.16, 18.33, 9.34. FTIR (film,  $\text{cm}^{-1}$ ) 3051.80, 2967.91, 2880.17, 2823.28, 1779.01, 1603.52. HRMS (ESI) calcd. for  $\text{C}_{17}\text{H}_{20}\text{BrNO}$  ( $m/z$   $\text{M}+\text{H}^+$ ): 334.0807, found 334.0807.

Ketone **16c** was also isolated as a white solid that was found to be approximately 95% pure as judged by  $^1\text{H}$  NMR spectroscopy (14 mg, 6%).  $^1\text{H}$  NMR (600 MHz,  $\text{CDCl}_3$ )  $\delta$  7.07 (t,  $J = 7.7$  Hz, 1H), 6.90 (d,  $J = 7.4$  Hz, 1H), 6.64 (t,  $J = 7.8$  Hz, 1H), 6.39 (d,  $J = 7.9$  Hz, 1H), 3.29 (s, 1H), 2.96 (s, 3H), 2.31 (td,  $J = 12.6, 3.1$  Hz, 1H), 2.24 (ddd,  $J = 13.0, 10.5, 6.9$  Hz, 1H), 2.10 (td,  $J = 10.5, 3.2$  Hz, 1H), 1.93 (td,  $J = 12.6, 7.0$  Hz, 1H), 1.70 – 1.59 (m, 2H), 1.54 (s, 3H), 0.99 (t,  $J = 7.6$  Hz, 3H).  $^{13}\text{C}$  NMR (150 MHz,  $\text{CDCl}_3$ )  $\delta$  207.56, 152.60, 131.72, 129.12, 125.36, 118.16, 108.38, 80.94, 66.28, 53.42, 48.09, 39.08, 30.89, 25.45, 23.63, 19.53, 9.95. FTIR (film,  $\text{cm}^{-1}$ ) 3048.91, 2964.05, 2880.17, 2817.49, 1779.97, 1604.48. HRMS (ESI) calcd. for  $\text{C}_{17}\text{H}_{20}\text{BrNO}$  ( $m/z$   $\text{M}+\text{H}^+$ ): 334.0807, found 334.0802.

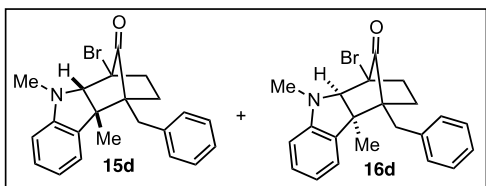

Following General Procedure F, a mixture of indole (100 mg, 0.689 mmol, 1.0 equiv), sodium carbonate (219 mg, 2.06 mmol, 3.0 equiv), and cyclopentanone **14d** (457 mg, 1.37 mmol, 2.0 equiv) in TFE (3.4 mL, 0.2 M) afforded ketone **15d** as a white solid that was found to be homogeneous as judged by  $^1\text{H}$  NMR spectroscopy (136 mg, 50%).  $^1\text{H}$  NMR (600 MHz,  $\text{CDCl}_3$ )  $\delta$  7.28 – 7.18 (m, 5H), 7.14 (t,  $J = 7.7$  Hz, 1H), 6.64 (d,  $J = 7.3$

Hz, 1H), 6.59 (t,  $J = 7.3$  Hz, 1H), 6.45 (d,  $J = 7.9$  Hz, 1H), 3.69 (s, 1H), 3.34 (d,  $J = 14.1$  Hz, 1H), 2.97 (s, 3H), 2.71 (d,  $J = 14.1$  Hz, 1H), 2.40 (td,  $J = 10.8, 4.4$  Hz, 1H), 1.77 (td,  $J = 12.2, 2.0$  Hz, 1H), 1.53 – 1.39 (m, 2H), 1.38 (s, 3H).  $^{13}\text{C}$  NMR (150 MHz,  $\text{CDCl}_3$ )  $\delta$  207.50, 153.64, 137.58, 130.92, 130.71, 129.26, 128.76, 126.84, 124.34, 117.74, 106.11, 79.13, 63.53, 53.22, 49.94, 34.84, 32.68, 27.49, 25.92, 25.54. FTIR (film,  $\text{cm}^{-1}$ ) 3058.55, 3026.73, 2950.55, 2870.52, 1781.90, 1604.48, 1492.63. HRMS (ESI) calcd. for  $\text{C}_{22}\text{H}_{22}\text{BrNO}$  ( $m/z$   $\text{M}+\text{H}^+$ ): 396.0963; found 396.0952.

We were not able to obtain an analytically pure sample of ketone **16d** for characterization.

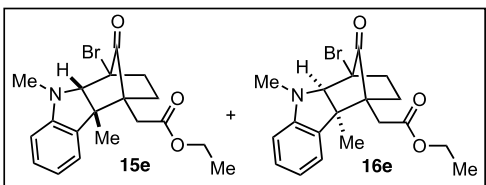

Following General Procedure F, a mixture of indole (100 mg, 0.689 mmol, 1.0 equiv), sodium carbonate (218 mg, 2.06 mmol, 3.0 equiv), and cyclopentanone **14e** (451 mg, 1.37 mmol, 2.0 equiv) in TFE (3.4 mL, 0.2 M) afforded ketone **15e** as a yellow oil that was found to be homogeneous as judged by  $^1\text{H}$  NMR spectroscopy (146 mg, 54%).  $^1\text{H}$  NMR (600 MHz,  $\text{CDCl}_3$ )  $\delta$  7.14 (t,  $J = 7.7$  Hz, 1H), 6.85 (d,  $J = 7.3$  Hz, 1H), 6.63 (t,  $J = 7.4$  Hz,

1H), 6.46 (d,  $J = 7.9$  Hz, 1H), 4.18 – 4.08 (m, 2H), 3.69 (d,  $J = 1.8$  Hz, 1H), 2.98 (s, 3H), 2.72 (d,  $J = 15.7$  Hz, 1H), 2.57 (d,  $J = 15.7$  Hz, 1H), 2.48 (td,  $J = 11.3, 3.2$  Hz, 1H), 2.10 – 1.95 (m, 2H), 1.63 (td,  $J = 11.1, 5.2$  Hz, 1H), 1.30 (s, 3H), 1.23 (t,  $J = 7.2$  Hz, 3H).  $^{13}\text{C}$  NMR (150 MHz,  $\text{CDCl}_3$ )  $\delta$  205.57, 171.06, 153.59, 130.10, 129.42, 124.49, 117.80, 106.27, 79.22, 62.88, 61.05, 52.94, 47.28, 34.97, 31.58, 27.64, 26.53, 25.88, 14.43. FTIR (film,  $\text{cm}^{-1}$ ) 3051.80, 2959.23, 2871.49, 2823.28, 1787.69, 1735.62, 1691.27. HRMS (ESI) calcd. for  $\text{C}_{19}\text{H}_{22}\text{BrNO}_3$  ( $m/z$   $\text{M}+\text{H}^+$ ): 392.0861, found 392.0843.

Ketone **16e** was not successfully isolated.

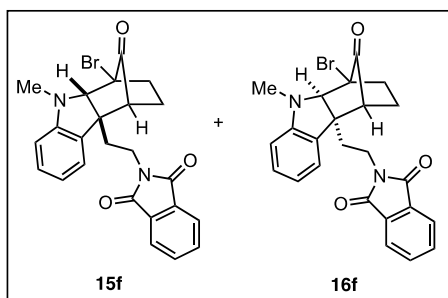

Following General Procedure F, a mixture of indole (100 mg, 0.329 mmol, 1.0 equiv), sodium carbonate (104 mg, 0.986 mmol, 3.0 equiv), and cyclopentanone **14f** (158 mg, 0.657 mmol, 2.0 equiv) in TFE (1.6 mL, 0.2 M) afforded ketone **15f** as a yellow oil that was found to be homogeneous as judged by  $^1\text{H}$  NMR spectroscopy (114 mg, 75%).  $^1\text{H}$  NMR (600 MHz,  $\text{CDCl}_3$ )  $\delta$  7.68 (dd,  $J = 3.2, 1.8$  Hz, 2H), 7.63 (dd,  $J = 3.0, 2.1$  Hz, 2H), 6.84 (t,  $J = 7.7$  Hz, 1H), 6.81 (d,  $J = 7.4$  Hz, 1H), 6.39 (t,  $J = 0.9$  Hz, 1H), 6.29 (d,  $J = 7.9$  Hz, 1H), 4.10 (s, 1H), 3.59 (ddd,  $J = 14.2, 8.6, 7.7$  Hz, 1H), 3.50 (ddd,  $J = 14.2, 8.5, 3.9$  Hz, 1H), 3.03 (s, 3H), 2.46 (dt,  $J = 14.3, 8.6$  Hz, 1H), 2.38 (td,  $J = 11.2, 4.6$  Hz, 1H), 2.05 (d,  $J = 5.0$  Hz,

1H), 1.90 (td,  $J = 12.4, 2.0$  Hz, 1H), 1.80 – 1.68 (m, 2H), 1.51 – 1.43 (m, 2H).  $^{13}\text{C}$  NMR (150 MHz,  $\text{CDCl}_3$ )  $\delta$  206.43, 168.15, 153.88, 133.99, 132.25, 129.26, 127.09, 124.28, 123.29, 117.84, 106.21, 74.73, 63.42, 53.42, 45.88, 36.57, 34.46, 33.60, 26.75, 21.18. FTIR (film,  $\text{cm}^{-1}$ ) 3054.69, 2983.34, 2947.66, 2873.42, 1768.40, 1710.55, 1605.45. HRMS (ESI) calcd. for  $\text{C}_{24}\text{H}_{21}\text{BrN}_2\text{O}_3$  ( $m/z$   $\text{M}+\text{H}^+$ ): 465.0814, found 465.0822.

Ketone **16f** was also isolated as a yellow oil that was found to be approximately 90% pure as judged by  $^1\text{H}$  NMR spectroscopy (7 mg, 4%).  $^1\text{H}$  NMR (600 MHz,  $\text{CDCl}_3$ )  $\delta$  7.80 (dd,  $J = 5.4, 3.0$  Hz, 2H), 7.70 (dd,  $J = 5.5, 3.0$  Hz, 2H), 7.03 (t,  $J = 7.7$  Hz, 1H), 6.97 (d,  $J = 7.3$  Hz, 1H), 6.64 (t,  $J = 7.4$  Hz, 1H), 6.36 (d,  $J = 7.9$  Hz, 1H), 3.59 (s, 1H), 3.55 (td,  $J = 10.7, 4.3$  Hz, 1H), 3.50 – 3.41 (m, 1H), 3.04 (s, 3H), 2.34 – 2.29 (m, 2H), 2.27 (d,  $J = 4.0$  Hz, 1H), 2.23 (ddd,  $J = 12.7, 10.4, 6.5$  Hz, 1H), 2.16 (td,  $J = 10.5, 3.2$  Hz, 1H), 2.11 – 2.04 (m, 1H), 2.03 – 1.96 (m, 1H).  $^{13}\text{C}$  NMR (150 MHz,  $\text{CDCl}_3$ )  $\delta$  205.04, 168.36, 151.95, 134.37, 132.34, 129.82, 129.45, 124.03, 123.55, 119.03, 108.14, 77.78, 65.99, 52.93, 45.76, 37.63, 35.05, 33.90, 31.35, 20.30. FTIR (film,  $\text{cm}^{-1}$ ) 3057.58, 2922.59, 2857.02, 1773.23, 1712.48, 1609.31, 1491.67. HRMS (ESI) calcd. for  $\text{C}_{24}\text{H}_{21}\text{BrN}_2\text{O}_3$  ( $m/z$   $\text{M}+\text{H}^+$ ): 465.0814, found 465.0817.

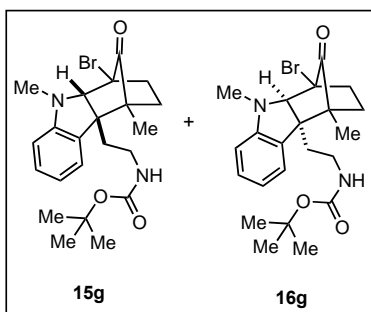

Following General Procedure F, a mixture of indole (100 mg, 0.364 mmol, 1.0 equiv), sodium carbonate (115 mg, 1.09 mmol, 3.0 equiv), and cyclopentanone **14a** (186 mg, 0.729 mmol, 2.0 equiv) in HFIP (1.8 mL, 0.2 M) afforded ketone **15g** as a colorless oil that was found to be homogeneous as judged by  $^1\text{H}$  NMR spectroscopy (84 mg, 52%).  $^1\text{H}$  NMR (600 MHz,  $\text{CDCl}_3$ )  $\delta$  7.13 (t,  $J = 7.4$  Hz, 1H), 6.87 (d,  $J = 7.2$  Hz, 1H), 6.64 (t,  $J = 7.4$  Hz, 1H), 6.43 (d,  $J = 7.9$  Hz, 1H), 4.27 (broad s, 1H), 3.87 (s, 1H), 3.05 – 2.92 (m, 4H), 2.61 (broad s, 1H), 2.44 – 2.33 (m, 1H), 2.00 – 1.86 (m, 2H), 1.63 (td,  $J = 11.2, 5.0$  Hz, 1H), 1.52 – 1.31 (m, 11H), 1.15 (s, 3H).  $^{13}\text{C}$  NMR (150 MHz,  $\text{CDCl}_3$ )  $\delta$  208.25, 155.88, 153.78, 129.62, 127.96, 123.82, 117.99, 106.25, 79.56, 75.16, 63.52, 55.05,

45.64, 36.91, 36.76, 34.49, 29.80, 28.71, 27.28, 12.22. FTIR (film,  $\text{cm}^{-1}$ ) 3417.24, 3053.73, 2977.55, 2934.16, 2872.45, 1786.72, 1710.55, 1605.45, 1563.02. HRMS (ESI) calcd. for  $\text{C}_{22}\text{H}_{29}\text{BrN}_2\text{O}_3$  ( $m/z$   $\text{M}+\text{H}^+$ ): 449.1440; found 449.1434.

\***Note:** This reaction was run at room temperature.

Ketone **16g** was also isolated as a colorless oil that was found to be homogeneous as judged by  $^1\text{H}$  NMR spectroscopy (21 mg, 13%).  $^1\text{H}$  NMR (600 MHz,  $\text{CDCl}_3$ )  $\delta$  7.06 (t,  $J = 7.7$  Hz, 1H), 6.83 (d,  $J = 7.5$  Hz, 1H), 6.62 (t,  $J = 7.4$  Hz, 1H), 6.37 (d,  $J = 8.0$  Hz, 1H), 4.36 (broad s, 1H), 3.56 (s, 1H), 3.02 – 2.91 (m, 4H), 2.66 (broad s, 1H), 2.36 – 2.19 (m, 3H), 2.05 (broad s, 1H), 1.96 (s, 1H), 1.77 – 1.64 (m, 1H), 1.52 – 1.36 (m, 11H), 1.13 (s, 3H).  $^{13}\text{C}$  NMR (150 MHz,  $\text{CDCl}_3$ )  $\delta$  207.71, 156.10, 153.04, 129.58, 127.89, 125.83, 118.17, 108.38, 79.77, 78.09, 66.04, 55.22, 45.44, 38.48, 37.20, 34.57, 31.38, 28.77, 28.05, 12.46. FTIR (film,  $\text{cm}^{-1}$ ) 3412.42, 3052.76, 2976.59, 2931.27, 2882.09, 1788.65, 1708.62, 1602.56, 1563.99. HRMS (ESI) calcd. for  $\text{C}_{22}\text{H}_{29}\text{BrN}_2\text{O}_3$  ( $m/z$   $\text{M}+\text{H}^+$ ): 449.1440; found 449.1441.

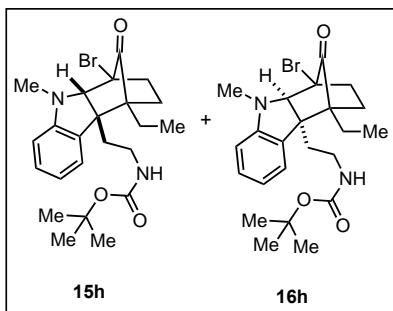

Following General Procedure F, a mixture of indole (100 mg, 0.364 mmol, 1.0 equiv), sodium carbonate (115 mg, 1.09 mmol, 3.0 equiv), and cyclopentanone **14b** (196 mg, 0.729 mmol, 2.0 equiv) in HFIP (1.8 mL, 0.2 M) afforded ketone **15h** as a colorless oil that was found to be homogeneous as judged by  $^1\text{H}$  NMR spectroscopy (84 mg, 50%).  $^1\text{H}$  NMR (600 MHz,  $\text{CDCl}_3$ )  $\delta$  7.14 (t,  $J = 7.1$  Hz, 1H), 6.88 (d,  $J = 7.4$  Hz, 1H), 6.64 (t,  $J = 7.4$  Hz, 1H), 6.43 (d,  $J = 7.9$  Hz, 1H), 4.24 (broad s, 1H), 3.83 (s, 1H), 3.06 – 2.93 (m, 4H), 2.59 (broad s, 1H), 2.42 (td,  $J = 11.3, 4.0$  Hz, 1H), 2.03 – 1.84 (m, 3H), 1.79 (td,  $J = 12.7, 4.3$  Hz, 1H), 1.63 – 1.32 (m, 12H), 0.95 (t,  $J = 7.5$  Hz, 3H).  $^{13}\text{C}$  NMR (150 MHz,  $\text{CDCl}_3$ )  $\delta$  207.93, 155.91, 154.02, 129.59, 127.95, 124.55, 117.93,

106.24, 79.60, 75.18, 63.76, 56.04, 49.14, 36.83, 36.64, 34.52, 28.73, 27.11, 24.31, 18.61, 9.53. FTIR (film,  $\text{cm}^{-1}$ ) 3414.35, 2974.66, 2939.95, 2883.06, 1779.01, 1710.55, 1603.52, 1546.63. HRMS (ESI) calcd. for  $\text{C}_{23}\text{H}_{31}\text{BrN}_2\text{O}_3$  ( $m/z$   $\text{M}+\text{H}^+$ ): 463.1596, found 463.1598.

\***Note:** This reaction was carried out at room temperature.

Ketone **16h** was also isolated as a colorless oil that was found to be homogeneous as judged by  $^1\text{H}$  NMR spectroscopy (24 mg, 14%).  $^1\text{H}$  NMR (600 MHz,  $\text{CDCl}_3$ )  $\delta$  7.06 (t,  $J = 7.6$  Hz, 1H), 6.85 (d,  $J = 7.4$  Hz, 1H), 6.63 (t,  $J = 7.4$  Hz, 1H), 6.36 (d,  $J = 7.9$  Hz, 1H), 4.36 (broad s, 1H), 3.54 (s, 1H), 2.99 – 2.92 (m, 4H), 2.60 (broad s, 1H), 2.34 – 2.22 (m, 2H), 2.15 – 2.05 (m, 2H), 2.03 – 1.89 (m, 2H), 1.74 – 1.66 (m, 1H), 1.66 –



1.58 (m, 2H), 1.50 – 1.36 (m, 9H), 0.97 (t,  $J = 7.6$  Hz, 3H).  $^{13}\text{C}$  NMR (150 MHz,  $\text{CDCl}_3$ )  $\delta$  207.33, 156.07, 153.24, 129.55, 127.59, 125.97, 118.18, 108.44, 79.73, 78.02, 65.98, 56.07, 48.42, 38.54, 37.26, 35.47, 31.01, 28.76, 23.03, 19.57, 9.99. FTIR (film,  $\text{cm}^{-1}$ ) 3412.42, 2974.66, 2938.02, 2883.06, 1782.87, 1708.62, 1601.59. HRMS (ESI) calcd. for  $\text{C}_{23}\text{H}_{31}\text{BrN}_2\text{O}_3$  ( $m/z$   $\text{M}+\text{H}^+$ ): 463.1596, found 463.1598.

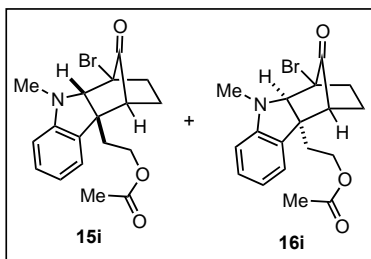

1.51 (td,  $J = 11.2$ , 4.5 Hz, 1H).  $^{13}\text{C}$  NMR (150 MHz,  $\text{CDCl}_3$ )  $\delta$  206.32, 170.96, 154.05, 129.71, 127.58, 124.58, 118.04, 106.59, 75.83, 63.37, 60.75, 53.32, 45.44, 38.27, 34.80, 26.46, 21.55, 21.07. FTIR (film,  $\text{cm}^{-1}$ ) 3544.52, 3460.63, 3052.76, 2953.45, 2925.48, 2829.06, 1781.90, 1738.51, 1605.45, 1492.63. HRMS (ESI) calcd. for  $\text{C}_{18}\text{H}_{20}\text{BrNO}_3$  ( $m/z$   $\text{M}+\text{H}^+$ ): 378.0705, 378.0697.

Ketone **16i** was not successfully isolated.

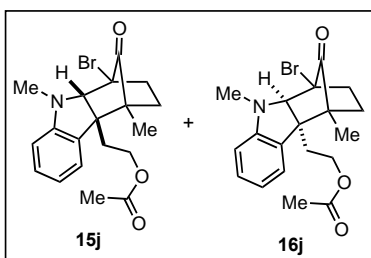

Following General Procedure F, a mixture of indole (100 mg, 0.460 mmol, 1.0 equiv), sodium carbonate (146 mg, 1.38 mmol, 3.0 equiv), and cyclopentanone **14a** (235 mg, 0.921 mmol, 2.0 equiv) in TFE (2.3 mL, 0.2 M) afforded ketone **15j** as a white solid that was found to be homogeneous as judged by  $^1\text{H}$  NMR spectroscopy (138 mg, 77%).  $^1\text{H}$  NMR (600 MHz,  $\text{CDCl}_3$ )  $\delta$  7.15 (t,  $J = 1.3$  Hz, 1H), 6.87 (d,  $J = 1.3$  Hz, 1H), 6.65 (t,  $J = 1.0$  Hz, 1H), 6.45 (d,  $J = 7.9$  Hz, 1H), 3.96 (d,  $J = 1.9$  Hz, 1H), 3.92 – 3.84 (m, 1H), 3.79 – 3.72 (m, 1H), 2.99 (s, 3H), 2.41 (td,  $J = 11.2$ , 4.6 Hz, 1H), 2.15 (ddd,  $J = 14.0$ , 8.5, 6.4 Hz, 1H), 1.96 – 1.87 (m, 4H), 1.64 (td,  $J = 11.2$ , 5.1 Hz, 1H), 1.61 – 1.57 (m, 1H), 1.48 (td,  $J = 12.8$ , 4.7 Hz, 1H), 1.17 (s, 3H).  $^{13}\text{C}$  NMR (150 MHz,  $\text{CDCl}_3$ )  $\delta$  208.25, 171.04, 153.87, 129.70, 127.76, 123.93, 117.97, 106.40, 75.28, 63.44, 61.07, 54.65, 45.73, 35.28, 34.68, 29.80, 27.32, 21.08, 12.21. FTIR (film,  $\text{cm}^{-1}$ ) 3051.80, 2960.20, 2902.34, 2826.17, 1787.69, 1739.48, 1605.45. HRMS (ESI) calcd. for  $\text{C}_{19}\text{H}_{22}\text{BrNO}_3$  ( $m/z$   $\text{M}+\text{H}^+$ ): 392.0861, 392.0852.

Ketone **16j** was not successfully isolated.

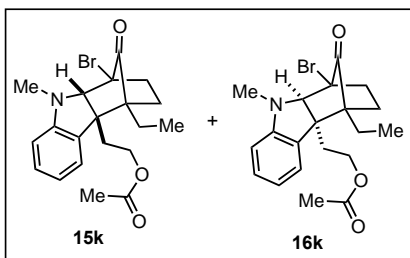

Following modified General Procedure F, a mixture of indole (100 mg, 0.460 mmol, 1.0 equiv), sodium carbonate (146 mg, 1.38 mmol, 3.0 equiv), and cyclopentanone **12a** (248 mg, 0.921 mmol, 2.0 equiv) in HFIP (2.3 mL, 0.2 M) afforded ketone **15k** as a colorless oil that was found to be homogeneous as judged by  $^1\text{H}$  NMR spectroscopy (46 mg, 24%).  $^1\text{H}$  NMR (600 MHz,  $\text{CDCl}_3$ )  $\delta$  7.13 (t,  $J = 7.7$  Hz, 1H), 6.88 (d,  $J = 7.3$  Hz, 1H), 6.63 (t,  $J = 7.4$  Hz, 1H), 6.44 (d,  $J = 7.9$  Hz, 1H), 3.91 (s, 1H), 3.86 (ddd,  $J = 11.3$ , 8.7, 5.5 Hz, 1H), 3.72 (ddd,  $J = 11.0$ , 7.8, 6.0 Hz, 1H), 2.98 (s, 3H), 2.43 (td,  $J = 11.2$ , 4.2 Hz, 1H), 2.17 (ddd,  $J = 13.8$ , 8.7, 6.3 Hz, 1H), 1.95 – 1.86 (m, 5H), 1.80 (td,  $J = 12.8$ , 4.2 Hz, 1H), 1.63 – 1.56 (m, 1H), 1.56 – 1.50 (m, 1H), 1.46 (ddd,  $J = 12.9$ , 11.2, 5.1 Hz, 1H), 0.96 (t,  $J = 7.5$  Hz, 3H).  $^{13}\text{C}$  NMR (150 MHz,  $\text{CDCl}_3$ )  $\delta$  207.87, 171.01, 154.05, 129.63, 127.69, 124.63, 117.88, 106.34, 75.25, 63.65, 61.13, 55.57, 49.18, 34.96, 34.67, 27.13, 24.23, 21.07, 18.55, 9.50. FTIR (film,  $\text{cm}^{-1}$ ) 3052.76, 2967.91, 2883.06, 2828.10, 1779.97, 1739.48, 1603.52, 1492.63. HRMS (ESI) calcd. for  $\text{C}_{20}\text{H}_{24}\text{BrNO}_3$  ( $m/z$   $\text{M}+\text{H}^+$ ): 406.1018; found 406.1017.

Ketone **16k** was also isolated as a dark green oil that was found to be homogeneous as judged by  $^1\text{H}$  NMR spectroscopy (20 mg, 11%).  $^1\text{H}$  NMR (600 MHz,  $\text{CDCl}_3$ )  $\delta$  7.07 (t,  $J = 7.7$  Hz, 1H), 6.86 (d,  $J = 7.5$  Hz, 1H), 6.64 (t,  $J = 7.5$  Hz, 1H), 6.38 (d,  $J = 8.0$  Hz, 1H), 3.84 (ddd,  $J = 11.2$ , 8.6, 6.1 Hz, 1H), 3.74 (ddd,  $J = 11.2$ ,

8.3, 5.8 Hz, 1H), 3.58 (s, 1H), 2.95 (s, 3H), 2.35 – 2.20 (m, 3H), 2.15 – 2.07 (m, 2H), 2.00 – 1.92 (m, 4H), 1.71 (p,  $J = 7.5$  Hz, 1H), 1.63 (p,  $J = 7.5$  Hz, 1H).  $^{13}\text{C}$  NMR (150 MHz,  $\text{CDCl}_3$ )  $\delta$  207.01, 171.07, 153.25, 129.69, 127.15, 125.96, 118.31, 108.64, 78.19, 65.87, 61.53, 55.69, 48.44, 38.74, 34.26, 31.00, 30.04, 23.09, 21.29, 19.55, 9.98. FTIR (film,  $\text{cm}^{-1}$ ) 3051.80, 2968.87, 2923.56, 1783.83, 1736.58, 1601.59, 1490.70. HRMS (ESI) calcd. for  $\text{C}_{20}\text{H}_{24}\text{BrNO}_3$  ( $m/z$   $\text{M}+\text{H}^+$ ): 406.1018; found 406.1012.

### G. Debromination:

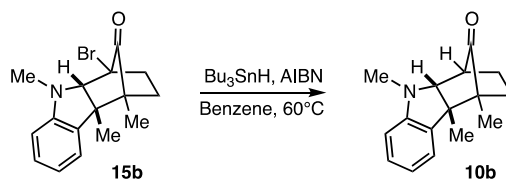

### General Procedure G:

To a flame-dried 10 mL round bottom flask, bromo-ketone **15b** (100 mg, 0.312 mmol, 1.0 equiv) was dissolved in benzene (1.3 mL, 0.25 M) under an atmosphere of nitrogen.  $\text{Bu}_3\text{SnH}$  (0.100 mL, 0.375 mmol, 1.2 equiv) and AIBN (0.005 g, 0.031 mmol, 0.10 equiv) were added sequentially and then the mixture was heated to  $60^\circ\text{C}$  for 20 h. When the reaction was judged complete as determined by thin-layer chromatographic analysis the reaction mixture was cooled to room temperature and the solvent was removed in *vacuo*. The residue was purified via silica gel flash column chromatography (hexanes/EtOAc) to afford debrominated ketone **10b** as a white solid that was found to be homogeneous as judged by  $^1\text{H}$  NMR spectroscopy (66 mg, 87%).

$^1\text{H}$  NMR (600 MHz,  $\text{CDCl}_3$ )  $\delta$  7.11 (t,  $J = 7.6$  Hz, 1H), 6.91 (d,  $J = 6.3$  Hz, 1H), 6.58 (t,  $J = 7.3$  Hz, 1H), 6.36 (d,  $J = 7.8$  Hz, 1H), 3.58 (d,  $J = 1.5$  Hz, 1H), 2.78 (s, 3H), 2.32 (t,  $J = 4.7$  Hz, 1H), 1.78 (td,  $J = 11.0, 4.5$  Hz, 1H), 1.67 – 1.59 (m, 1H), 1.45 (td,  $J = 11.1, 5.2$  Hz, 1H), 1.38 – 1.33 (m, 1H), 1.21 (s, 3H), 1.07 (s, 3H).  $^{13}\text{C}$  NMR (150 MHz,  $\text{CDCl}_3$ )  $\delta$  215.98, 153.57, 131.85, 128.82, 124.15, 116.65, 104.86, 71.65, 49.59, 48.89, 44.28, 33.04, 28.17, 26.05, 17.28, 11.64. FTIR (film,  $\text{cm}^{-1}$ ) 2958.27, 2928.38, 2867.63, 1768.40, 1604.48, 1493.60. HRMS (ESI) calcd. for  $\text{C}_{16}\text{H}_{19}\text{NO}$  ( $m/z$   $\text{M}+\text{H}^+$ ): 242.1545; found 242.1539.

## Computational Studies

Initial DFT calculations were carried out using the B3LYP-D3 functional,<sup>1</sup> combined with the Grimme D3 dispersion correction,<sup>2</sup> and the 6-311G\*\* basis set,<sup>3</sup> to obtain optimized structures; for molecules containing bromine, the Los Alamos core potential was used.<sup>4</sup> Final zero point energy corrected free energies were obtained by single point calculations using B3LYP-D3 and the def2-tzvp basis,<sup>5</sup> with an implicit Poisson-Boltzmann<sup>6</sup> solvent model for trifluoroethanol (TFE), as implemented in the Jaguar suite of programs.<sup>7</sup> Computed structures were confirmed as energy minima or transition structures by calculating the vibrational frequencies using second derivative analytic methods and confirming a single imaginary frequency for first order saddle points, and the absence of imaginary frequencies for minima. SCFE energies and corrected free energies are compiled in Table S1.

Energy Decomposition Analyses (EDA),<sup>8</sup> and Natural Orbitals for Chemical Valence (NOCV).<sup>9</sup> calculations were carried out on transition structures (**TS2**) using B3LYP-D3 and the triple zeta basis TZVP, as implemented in the ADF suite of programs.<sup>10</sup> Results are compiled in Table S2.

XYZ coordinate files of all calculated structures are provided at the end of this section

## References

- (1) (a) Lee, C.; Yang, W.; Parr, R. G. Development of the Colle-Salvetti correlation-energy formula into a functional of the electron density. *Phys. Rev. B* **1988**, *37* (2), 785-789. From SciFinder CAPLUS. (b) Becke, A. D. Density-functional thermochemistry. III. The role of exact exchange. *J. Chem. Phys.* **1993**, *98* (7), 5648-5652. (c) Becke, A. D. A new mixing of Hartree-Fock and local-density-functional theories. *J. Chem. Phys.* **1993**, *98* (2), 1372-1377. (d) Stephens, P. J.; Devlin, F. J.; Chabalowski, C. F.; Frisch, M. J. Ab Initio Calculation of Vibrational Absorption and Circular Dichroism Spectra Using Density Functional Force Fields. *J. Phys. Chem.* **1994**, *98* (45), 11623-11627. From SciFinder CAPLUS. (e) Andersson, M. P.; Uvdal, P. New Scale Factors for Harmonic Vibrational Frequencies Using the B3LYP Density Functional Method with the Triple- $\zeta$  Basis Set 6-311+G(d,p). *J. Phys. Chem. A* **2005**, *109* (12), 2937-2941, doi: 10.1021/jp045733a. DOI: 10.1021/jp045733a.
- (2) (a) Goerigk, L.; Grimme, S. A thorough benchmark of density functional methods for general main group thermochemistry, kinetics, and noncovalent interactions. *Phys. Chem. Chem. Phys.* **2011**, *13* (14), 6670-6688, 10.1039/c0cp02984j. DOI: 10.1039/c0cp02984j. (b) Grimme, S.; Antony, J.; Ehrlich, S.; Krieg, H. A consistent and accurate ab initio parametrization of density functional dispersion correction (DFT-D) for the 94 elements H-Pu. *J. Chem. Phys.* **2010**, *132* (15), 154104.
- (3) (a) Frisch, M. J.; Pople, J. A.; Binkley, J. S. Self-consistent molecular orbital methods. 25. Supplementary functions for Gaussian basis sets. *J. Chem. Phys.* **1984**, *80* (7), 3265-3269. (b) Clark, T.; Chandrasekhar, J.; Spitznagel, G. W.; Schleyer, P. v. R. Efficient diffuse function-augmented basis sets for anion calculations. III. The 3-21 + G basis set for first-row elements, lithium to fluorine. *J. Comput. Chem.* **1983**, *4*, 294-301, 10.1002/jcc.540040303. DOI: 10.1002/jcc.540040303. (c) McLean, A. D.; Chandler, G. S. Contracted Gaussian basis sets for molecular calculations. I. Second row atoms, Z = 11-18. *J. Chem. Phys.* **1980**, *72*, 5639-5648, 10.1063/1.438980. DOI: 10.1063/1.438980. (d) Krishnan, R.; Binkley, J. S.; Seeger, R.; Pople, J. A. Self-consistent molecular orbital methods. XX. A basis set for correlated wave functions. *J. Chem. Phys.* **1980**, *72* (1), 650-654.
- (4) (a) Wadt, W. R.; Hay, P. J. Ab initio effective core potentials for molecular calculations. Potentials for main group elements sodium to bismuth. *J. Chem. Phys.* **1985**, *82* (1), 284-298. (b) Hay, P. J.; Wadt, W. R. Ab initio effective core potentials for molecular calculations. Potentials for potassium to gold including the outermost core orbitals. *J. Chem. Phys.* **1985**, *82* (1), 299-310. (c) Hay, P. J.; Wadt, W. R. Ab initio effective core potentials for molecular calculations. Potentials for the transition metal atoms scandium to mercury. *J. Chem. Phys.* **1985**, *82* (1), 270-283. (d) Dunning, T. H.; Hay, P. J. *Modern Theoretical Chemistry, Vol. 4: Applications of Electronic Structure Theory*. Schaefer, H. F., III (Editor), Ed.; Plenum, NY: 1977; p 461.

- (5) (a) Schaefer, A.; Huber, C.; Ahlrichs, R. Fully optimized contracted Gaussian basis sets of triple zeta valence quality for atoms Li to Kr. *J. Chem. Phys.* **1994**, *100* (8), 5829-5835, 10.1063/1.467146. DOI: 10.1063/1.467146. (b) Schaefer, A.; Horn, H.; Ahlrichs, R. Fully optimized contracted Gaussian basis sets for atoms lithium to krypton. *J. Chem. Phys.* **1992**, *97* (4), 2571-2577, 10.1063/1.463096. DOI: 10.1063/1.463096.
- (6) (a) Marten, B.; Kim, K.; Cortis, C.; Friesner, R. A.; Murphy, R. B.; Ringnalda, M. N.; Sitkoff, D.; Honig, B. A New Model For Calculation of Solvation Free Energies: Correction of Self-Consistent Reaction Field Continuum Dielectric Theory for Short Range Hydrogen-Bonding Effects. *J. Phys. Chem.* **1996**, *100* (28), 11775-11788. From SciFinder CAPLUS. (b) Tannor, D. J.; Marten, B.; Murphy, R.; Friesner, R. A.; Sitkoff, D.; Nicholls, A.; Honig, B.; Ringnalda, M.; Goddard, W. A. Accurate First Principles Calculation of Molecular Charge Distributions and Solvation Energies from Ab Initio Quantum Mechanics and Continuum Dielectric Theory. *J. Am. Chem. Soc.* **1994**, *116* (26), 11875-11882. DOI: 10.1021/ja00105a030 (accessed 2013/11/29).
- (7) (a) *Jaguar, versions 7.0-10.2*; Schrödinger, LLC, New York, NY: 2007-2020. (accessed. (b) Bochevarov, A. D.; Harder, E.; Hughes, T. F.; Greenwood, J. R.; Braden, D. A.; Philipp, D. M.; Rinaldo, D.; Halls, M. D.; Zhang, J.; Friesner, R. A. Jaguar: A high-performance quantum chemistry software program with strengths in life and materials sciences. *Int. J. Quantum Chem.* **2013**, *113* (18), 2110-2142. DOI: 10.1002/qua.24481.
- (8) (a) Andrés, J.; Ayers, P. W.; Boto, R. A.; Carbó-Dorca, R.; Chermette, H.; Cioslowski, J.; Contreras-García, J.; Cooper, D. L.; Frenking, G.; Gatti, C.; et al. Nine questions on energy decomposition analysis. *J. Comput. Chem.* **2019**, *40* (26), 2248-2283. DOI: 10.1002/jcc.26003. (b) Frenking, G.; Bickelhaupt, F. M. The EDA perspective of chemical bonding. In *The Chemical Bond*, Frenking, G., Shaik, S. Eds.; Vol. 1; Wiley-VCH Verlag GmbH & Co., 2014; pp 121-157. (c) Hopffgarten, M. v.; Frenking, G. Energy decomposition analysis. *Wiley Interdisciplinary Reviews: Computational Molecular Science* **2012**, *2* (1), 43-62. DOI: 10.1002/wcms.71.
- (9) (a) Mitoraj, M. P.; Parafiniuk, M.; Srebro, M.; Handzlik, M.; Buczek, A.; Michalak, A. Applications of the ETS-NOCV method in descriptions of chemical reactions. *J Mol Model* **2011**, *17* (9), 2337-2352. (b) Mitoraj, M. P.; Michalak, A.; Ziegler, T. A Combined Charge and Energy Decomposition Scheme for Bond Analysis. *J. Chem. Theory Comput.* **2009**, *5* (4), 962-975, doi: 10.1021/ct800503d. DOI: 10.1021/ct800503d. (c) Mitoraj, M.; Michalak, A. Applications of natural orbitals for chemical valence in a description of bonding in conjugated molecules. *J. Mol. Model.* **2008**, *14* (Copyright (C) 2011 American Chemical Society (ACS). All Rights Reserved.), 681-687, 10.1007/s00894-008-0276-1. DOI: 10.1007/s00894-008-0276-1. (d) Mitoraj, M.; Michalak, A. Natural orbitals for chemical valence as descriptors of chemical bonding in transition metal complexes. *J. Mol. Model.* **2007**, *13* (Copyright (C) 2011 American Chemical Society (ACS). All Rights Reserved.), 347-355, 10.1007/s00894-006-0149-4. DOI: 10.1007/s00894-006-0149-4.
- (10) (a) *ADF 2010-2016*; SCM, Theoretical Chemistry, Vrije Universiteit, Amsterdam, The Netherlands, <http://www.scm.com>; (accessed. (b) Guerra, C. F.; Snijders, J. G.; Velde, G. t.; Baerends, E. J. Towards an order-N DFT method. *Theoretical Chemistry Accounts* **1998**, *99*, 391-403. (c) Bickelhaupt, F. M.; Baerends, E. J. Kohn-Sham density functional theory: predicting and understanding chemistry. *Rev. Comput. Chem.* **2000**, *15*, 1-86. From SciFinder CAPLUS.

**Table S1.** EDA results [SCF Energies (kcal/mol)] for the rate limiting transition states (**TS2**) in reactions of oxyallyl cations with dimethylindole.

| Entry                  |                                          |                         |                        |                           |                        |                         |                                    |                                     |
|------------------------|------------------------------------------|-------------------------|------------------------|---------------------------|------------------------|-------------------------|------------------------------------|-------------------------------------|
| <b>1</b>               | <b>7 (R<sup>2</sup>=CH<sub>3</sub>)</b>  |                         |                        |                           |                        |                         |                                    |                                     |
|                        | <b>TS2</b>                               | <b>E<sub>prep</sub></b> | <b>E<sub>int</sub></b> | <b>E<sub>steric</sub></b> | <b>E<sub>orb</sub></b> | <b>E<sub>disp</sub></b> | <b>E<sub>tot</sub><sup>b</sup></b> | <b>ΔE<sub>tot</sub><sup>c</sup></b> |
|                        | obs major                                | +24.7                   | -30.9                  | +59.1                     | -75.9                  | -14.0                   | -6.2                               | 0.0                                 |
|                        | obs minor                                | +20.2                   | -23.3                  | +52.4                     | -65.9                  | -9.9                    | -3.1                               | +3.1                                |
|                        | n/o major <sup>a</sup>                   | +33.5                   | -35.3                  | +58.7                     | -79.8                  | -14.2                   | -1.8                               | +4.6                                |
| n/o minor <sup>a</sup> | +27.8                                    | -28.0                   | +51.9                  | -67.6                     | -12.3                  | -0.2                    | +5.9                               |                                     |
| <b>2</b>               | <b>11 (R<sup>2</sup>=H)</b>              |                         |                        |                           |                        |                         |                                    |                                     |
|                        | obs major                                | +23.0                   | -33.3                  | +53.1                     | -71.4                  | -15.0                   | -10.3                              | 0                                   |
|                        | obs minor                                | +18.0                   | -24.3                  | +45.7                     | -59.9                  | -10.2                   | -6.3                               | +4.0                                |
|                        | n/o major <sup>a</sup>                   | +31.9                   | -34.9                  | +54.0                     | -74.2                  | -14.8                   | -3.0                               | +7.3                                |
| n/o minor <sup>a</sup> | +27.7                                    | -29.8                   | +48.2                  | -64.7                     | -13.2                  | -2.0                    | +8.3                               |                                     |
| <b>3</b>               | <b>11 (R<sup>2</sup>=CH<sub>3</sub>)</b> |                         |                        |                           |                        |                         |                                    |                                     |
|                        | obs major                                | +34.6                   | -37.4                  | +63.7                     | -84.2                  | -16.8                   | -2.7                               | 0.0                                 |
|                        | obs minor                                | +29.6                   | -29.0                  | +54.7                     | -71.0                  | -12.7                   | +0.6                               | +3.3                                |
|                        | n/o major <sup>a</sup>                   | +34.4                   | -34.2                  | +63.1                     | -81.1                  | -16.2                   | +0.2                               | +2.9                                |
| n/o minor <sup>a</sup> | +30.9                                    | -28.6                   | +56.4                  | -71.6                     | -13.4                  | +2.3                    | +5.0                               |                                     |

- a. n/o = not observed  
b.  $E_{tot} = E_{int} + E_{prep}$   
c.  $E_{tot} - E_{tot}$  (major isomer)

**Table S2.** DFT Calculated Energies (B3LYP-D3/def2-tzvp/solv//B3LYP-D3/LACV3P\*\*)

|                                                   | Total Free<br>Energy<br>G (au) at<br>298.15K 1.0atm | G(kcal/mol) | G(relative)<br>kcal/mol) | SCFE (au)           |
|---------------------------------------------------|-----------------------------------------------------|-------------|--------------------------|---------------------|
| <b>REACTANTS</b>                                  |                                                     |             |                          |                     |
| <b>8a</b>                                         | -442.471681                                         | -277655.2   | -                        | -442.613447         |
| <b>7 (R<sup>2</sup>=CH<sub>3</sub>)</b>           | -308.658514                                         | -193686.1   | -                        | -308.724961         |
| <b>11 (R<sup>2</sup>=H)</b>                       | -2842.937304                                        | -1783970.2  | -                        | -2842.968493        |
| <b>11 (R<sup>2</sup>=CH<sub>3</sub>)</b>          | -2882.256559                                        | -1808643.4  | -                        | -2882.314165        |
| <b>REACTIONS</b>                                  |                                                     |             |                          |                     |
| <b>8a+7 (R<sup>2</sup>=CH<sub>3</sub>)</b>        | -751.130195                                         | -471341.3   | <b>0.0</b>               | -751.338408         |
| <b>OBSERVED REGIOISOMER: MAJOR STEREOISOMER</b>   |                                                     |             |                          |                     |
| <b>9a</b>                                         | -751.148635                                         | -471352.9   | -11.6                    | -751.411250         |
| <b>TS1</b>                                        | -751.093003                                         | -471318.0   | 23.3                     | -751.327864         |
| <b>TS2</b>                                        | -751.099806                                         | -471322.3   | 19.1                     | -751.348850         |
| <b>TS3</b>                                        | -751.092974                                         | -471318.0   | 23.4                     | -751.331887         |
| <b>TS4</b>                                        | -751.120291                                         | -471335.1   | 6.2                      | -751.378747         |
| <b>INT2</b>                                       | -751.132247                                         | -471342.6   | -1.3                     | -751.398522         |
| <b>INT3</b>                                       | -751.099205                                         | -471321.9   | 19.4                     | -751.335640         |
| <b>OBSERVED REGIOISOMER: MINOR STEREOISOMER</b>   |                                                     |             |                          |                     |
| <b>13a</b>                                        | -751.147506                                         | -471352.2   | -10.9                    | -751.408910         |
| <b>TS1'</b>                                       | -751.091051                                         | -471316.8   | 24.6                     | -751.332221         |
| <b>TS2'</b>                                       | -751.099061                                         | -471321.8   | 19.5                     | -751.344380         |
| <b>TS3'</b>                                       | -751.095110                                         | -471319.3   | 22.0                     | -751.332934         |
| <b>INT2'</b>                                      | -751.130197                                         | -471341.3   | 0.0                      | -751.396354         |
| <b>INT3'</b>                                      | -751.101074                                         | -471323.1   | 18.3                     | -751.335152         |
| <b>UNOBSERVED REGIOISOMER: MAJOR STEREOISOMER</b> |                                                     |             |                          |                     |
| <b>10</b>                                         | -751.147391                                         | -471352.1   | -10.8                    | -751.410343         |
| <b>TS1</b>                                        | -751.089962                                         | -471316.1   | 25.2                     | -751.322997         |
| <b>TS2</b>                                        | -751.092200                                         | -471317.5   | 23.8                     | -751.341942         |
| <b>TS4</b>                                        | -751.114581                                         | -471331.5   | 9.8                      |                     |
| <b>INT2</b>                                       | -751.124831                                         | -471338.0   | 3.4                      | -751.391713         |
| <b>UNOBSERVED REGIOISOMER: MINOR STEREOISOMER</b> |                                                     |             |                          |                     |
| <b>TS2</b>                                        | -751.094007                                         | -471318.6   | 22.7                     | -751.339112         |
| <b>8a+11 (R<sup>2</sup>=H)</b>                    |                                                     |             |                          |                     |
|                                                   | -3285.408985                                        | -2061625.3  | <b>0.0</b>               |                     |
| <b>OBSERVED REGIOISOMER: MAJOR STEREOISOMER</b>   |                                                     |             |                          |                     |
| <b>TS2</b>                                        | -3285.385390                                        | -2061610.5  | 14.8                     | -3285.599078        |
| <b>15a</b>                                        | -3285.431452                                        | -2061639.4  | -14.1                    | -3285.658635        |
| <b>INT2</b>                                       | -3285.414332                                        | -2061628.7  | -3.4                     | -3285.644450        |
| <b>TS4</b>                                        | -3285.400378                                        | -2061619.9  | 5.4                      | <b>-3285.622816</b> |
| <b>OBSERVED REGIOISOMER: MINOR STEREOISOMER</b>   |                                                     |             |                          |                     |
| <b>16a</b>                                        | -3285.429406                                        | -2061638.2  | -12.8                    | -3285.654281        |
| <b>INT2</b>                                       | -3285.411867                                        | -2061627.2  | -1.8                     | -3285.641947        |
| <b>TS2</b>                                        | -3285.384462                                        | -2061610.0  | 15.4                     | -3285.592655        |

|                                                   |              |            |            |              |
|---------------------------------------------------|--------------|------------|------------|--------------|
| <b>UNOBSERVED REGIOISOMER: MAJOR STEREOISOMER</b> |              |            |            |              |
| TS2                                               | -3285.374088 | -2061603.5 | 21.9       | -3285.587182 |
| INT2                                              | -3285.412974 | -2061627.9 | -2.5       | -3285.641222 |
|                                                   | -3285.428812 | -2061637.8 | -12.4      | -3285.653343 |
| <b>UNOBSERVED REGIOISOMER: MINOR STEREOISOMER</b> |              |            |            |              |
| TS2                                               | -3285.376075 | -2061604.7 | 20.7       | -3285.585150 |
| <hr/>                                             |              |            |            |              |
| 8a+11(R <sup>2</sup> =CH <sub>3</sub> )           | -3324.728240 | -2086298.6 | <b>0.0</b> |              |
| <b>OBSERVED REGIOISOMER: MAJOR STEREOISOMER</b>   |              |            |            |              |
| 15b                                               | -3324.739507 | -2086305.6 | -7.1       | -3324.993588 |
| TS1                                               | -3324.681339 | -2086269.1 | 29.4       | -3324.911257 |
| TS2                                               | -3324.691708 | -2086275.6 | 22.9       | -3324.932780 |
| TS3                                               | -3324.686997 | -2086272.7 | 25.9       | -3324.916154 |
| INT2                                              | -3324.716448 | -2086291.2 | 7.4        | -3324.973904 |
| INT3                                              | -3324.695141 | -2086277.8 | 20.8       | -3324.919021 |
| <b>OBSERVED REGIOISOMER: MINOR STEREOISOMER</b>   |              |            |            |              |
| 15b(minor stereoisomer)                           | -3324.737079 | -2086304.1 | -5.5       | -3324.989303 |
| TS1                                               | -3324.680453 | -2086268.6 | 30.0       | -3324.915182 |
| TS2                                               | -3324.690782 | -2086275.1 | 23.5       | -3324.927023 |
| INT2                                              | -3324.714534 | -2086290.0 | 8.6        | -3324.972144 |
| <b>UNOBSERVED REGIOISOMER: MAJOR STEREOISOMER</b> |              |            |            |              |
| TS2                                               | -3324.687311 | -2086272.9 | 25.7       | -3324.927662 |
|                                                   | -3324.739298 | -2086305.5 | -6.9       | -3324.993008 |
|                                                   | -3324.730006 | -2086299.7 | -1.1       | -3324.984799 |
| <b>UNOBSERVED REGIOISOMER: MINOR STEREOISOMER</b> |              |            |            |              |
| TS2                                               | -3324.687740 | -2086273.1 | 25.4       | -3324.924486 |
| INT2                                              | -3324.724499 | -2086296.2 | 2.3        | -3324.978455 |

## XYZ coordinate files for DFT calculated structures.

### Reactants

#### Dimethylindole (8a)

22

DIMETHYL\_INDOLE\_DEF2\_TZVP\_SP\_TRIFLUOROETHANOL

|   |          |          |          |
|---|----------|----------|----------|
| C | -1.38820 | 1.28380  | 0.40260  |
| C | -2.72440 | 1.53860  | 0.74190  |
| C | -3.72270 | 0.74760  | 0.19090  |
| C | -3.41180 | -0.29940 | -0.69680 |
| C | -2.09840 | -0.57630 | -1.05340 |
| C | -1.09640 | 0.22440  | -0.49960 |
| C | -0.13480 | 1.88320  | 0.77540  |
| C | 0.83420  | 1.18550  | 0.10520  |
| N | 0.26970  | 0.18660  | -0.67360 |
| H | -2.97240 | 2.34260  | 1.42640  |
| H | -4.75950 | 0.93500  | 0.44640  |
| H | -4.21280 | -0.90200 | -1.10970 |
| H | -1.86320 | -1.38560 | -1.73520 |
| H | 1.90520  | 1.32400  | 0.11310  |
| C | 0.98590  | -0.77980 | -1.47800 |
| H | 2.03510  | -0.49020 | -1.53670 |
| H | 0.92270  | -1.78450 | -1.04650 |
| H | 0.57980  | -0.80970 | -2.49310 |
| C | 0.05890  | 3.04040  | 1.70460  |
| H | 1.11770  | 3.28710  | 1.81350  |
| H | -0.45680 | 3.93610  | 1.34150  |
| H | -0.33740 | 2.82350  | 2.70260  |

#### 7 (R<sup>2</sup>=CH<sub>3</sub>)

15

METHYL\_OXALLYL\_DEF2\_TZVP\_SP\_TRIFLUOROETHANOL

|   |          |         |          |
|---|----------|---------|----------|
| C | -0.47970 | 4.65530 | -1.09560 |
| C | 0.98240  | 3.58000 | -2.44040 |
| C | -1.32730 | 4.08740 | -2.16330 |
| H | -2.09000 | 3.40340 | -1.76470 |
| C | 0.92140  | 4.39580 | -1.23590 |
| O | 1.88880  | 4.74500 | -0.54460 |
| H | -1.88840 | 4.86220 | -2.70540 |
| C | -0.32710 | 3.35710 | -3.07820 |
| H | -0.54890 | 2.28450 | -3.16920 |
| H | -0.34310 | 3.74300 | -4.10780 |
| H | -0.88130 | 5.23760 | -0.27290 |
| C | 2.27730  | 3.08960 | -2.93650 |
| H | 2.19840  | 2.20970 | -3.57790 |



|   |         |         |          |
|---|---------|---------|----------|
| H | 2.75880 | 3.89230 | -3.51600 |
| H | 2.94130 | 2.91640 | -2.08350 |

### 11 (R<sup>2</sup>=H)

12

BROMO\_H\_OXALLYL

|    |          |         |          |
|----|----------|---------|----------|
| C  | -0.48270 | 4.67540 | -1.08690 |
| C  | 0.97810  | 3.60700 | -2.37960 |
| C  | -1.33770 | 4.10670 | -2.14450 |
| H  | -2.10050 | 3.43600 | -1.73060 |
| C  | 0.94900  | 4.40450 | -1.18370 |
| O  | 1.85730  | 4.76520 | -0.44140 |
| H  | -1.88260 | 4.88920 | -2.68690 |
| C  | -0.32200 | 3.36850 | -3.03570 |
| H  | -0.55160 | 2.29650 | -3.11350 |
| H  | -0.33530 | 3.74630 | -4.06780 |
| Br | -1.18850 | 5.70840 | 0.32070  |
| H  | 1.91150  | 3.21340 | -2.76890 |

### 11 (R<sup>2</sup>=CH<sub>3</sub>)

15

BROMO\_METHYL\_OXALLYL\_DEF2\_TZVP\_SP\_TRIFLUOROETHANOL

|    |          |         |          |
|----|----------|---------|----------|
| C  | -0.47660 | 4.67410 | -1.08300 |
| C  | 0.98690  | 3.59840 | -2.38420 |
| C  | -1.33610 | 4.11240 | -2.14630 |
| H  | -2.10180 | 3.44230 | -1.73760 |
| C  | 0.93550  | 4.41050 | -1.18830 |
| O  | 1.87920  | 4.75970 | -0.47540 |
| H  | -1.87400 | 4.89750 | -2.69150 |
| C  | -0.32110 | 3.37120 | -3.03640 |
| H  | -0.54640 | 2.29860 | -3.11220 |
| H  | -0.32620 | 3.74750 | -4.06890 |
| Br | -1.19410 | 5.70850 | 0.32880  |
| C  | 2.27670  | 3.09250 | -2.88710 |
| H  | 2.18390  | 2.13820 | -3.41190 |
| H  | 2.69600  | 3.81910 | -3.59970 |
| H  | 2.98790  | 3.02920 | -2.05960 |

**Reaction 8a + 7 (R<sup>2</sup> = CH<sub>3</sub>): observed regioisomer; major stereoisomer**

**9a**

37

| REACTION1 | A | OBS      | MAJOR | DEF2     | TZVP | SP | TRIFLUOROETHANOL |
|-----------|---|----------|-------|----------|------|----|------------------|
| C         |   | -1.49510 |       | 1.93940  |      |    | -0.05380         |
| C         |   | -2.71040 |       | 2.04080  |      |    | 0.59830          |
| C         |   | -3.63470 |       | 0.99260  |      |    | 0.50170          |
| C         |   | -3.31400 |       | -0.14390 |      |    | -0.23670         |
| C         |   | -2.09000 |       | -0.25890 |      |    | -0.90170         |
| C         |   | -1.18770 |       | 0.80260  |      |    | -0.81830         |
| C         |   | -0.32070 |       | 2.89110  |      |    | -0.05960         |
| C         |   | 0.72970  |       | 2.13540  |      |    | -0.97900         |
| N         |   | 0.05160  |       | 0.92340  |      |    | -1.43900         |
| H         |   | -2.94210 |       | 2.92220  |      |    | 1.18740          |
| H         |   | -4.59010 |       | 1.06170  |      |    | 1.00760          |
| H         |   | -4.02510 |       | -0.96010 |      |    | -0.30000         |
| H         |   | -1.85780 |       | -1.15070 |      |    | -1.47080         |
| H         |   | 1.63100  |       | 1.87450  |      |    | -0.40880         |
| C         |   | 0.82950  |       | -0.24070 |      |    | -1.80830         |
| H         |   | 1.72260  |       | 0.07740  |      |    | -2.34610         |
| H         |   | 1.13960  |       | -0.83540 |      |    | -0.93440         |
| H         |   | 0.25600  |       | -0.88630 |      |    | -2.47760         |
| C         |   | 0.21770  |       | 3.14410  |      |    | 1.35520          |
| H         |   | 1.10090  |       | 3.78950  |      |    | 1.33410          |
| H         |   | -0.54260 |       | 3.63240  |      |    | 1.97070          |
| H         |   | 0.48740  |       | 2.20050  |      |    | 1.83550          |
| C         |   | -0.52330 |       | 4.24070  |      |    | -0.81660         |
| C         |   | 1.10550  |       | 3.16470  |      |    | -2.09200         |
| C         |   | -1.20880 |       | 4.01120  |      |    | -2.18100         |
| H         |   | -2.10480 |       | 3.39850  |      |    | -2.08100         |
| C         |   | 0.92020  |       | 4.46020  |      |    | -1.27850         |
| O         |   | 1.69460  |       | 5.35570  |      |    | -1.07710         |
| H         |   | -1.50330 |       | 4.96710  |      |    | -2.61910         |
| C         |   | -0.10300 |       | 3.31110  |      |    | -3.04720         |
| H         |   | -0.42320 |       | 2.33800  |      |    | -3.41870         |
| H         |   | 0.17910  |       | 3.93040  |      |    | -3.90210         |
| C         |   | 2.46000  |       | 2.98940  |      |    | -2.74730         |
| H         |   | 2.48340  |       | 2.10530  |      |    | -3.39040         |
| H         |   | 2.70030  |       | 3.86060  |      |    | -3.36190         |
| H         |   | 3.24780  |       | 2.89080  |      |    | -1.99530         |
| H         |   | -0.94360 |       | 5.03610  |      |    | -0.20440         |

**TS1**

37

| REACTION1 | A | OBS | MAJOR | DEF2 | TZVP | SP | TRIFLUOROETHANOL |
|-----------|---|-----|-------|------|------|----|------------------|
|-----------|---|-----|-------|------|------|----|------------------|

|   |          |          |          |
|---|----------|----------|----------|
| C | -1.49510 | 1.93940  | -0.05380 |
| C | -2.71040 | 2.04080  | 0.59830  |
| C | -3.63470 | 0.99260  | 0.50170  |
| C | -3.31400 | -0.14390 | -0.23670 |
| C | -2.09000 | -0.25890 | -0.90170 |
| C | -1.18770 | 0.80260  | -0.81830 |
| C | -0.32070 | 2.89110  | -0.05960 |
| C | 0.72970  | 2.13540  | -0.97900 |
| N | 0.05160  | 0.92340  | -1.43900 |
| H | -2.94210 | 2.92220  | 1.18740  |
| H | -4.59010 | 1.06170  | 1.00760  |
| H | -4.02510 | -0.96010 | -0.30000 |
| H | -1.85780 | -1.15070 | -1.47080 |
| H | 1.63100  | 1.87450  | -0.40880 |
| C | 0.82950  | -0.24070 | -1.80830 |
| H | 1.72260  | 0.07740  | -2.34610 |
| H | 1.13960  | -0.83540 | -0.93440 |
| H | 0.25600  | -0.88630 | -2.47760 |
| C | 0.21770  | 3.14410  | 1.35520  |
| H | 1.10090  | 3.78950  | 1.33410  |
| H | -0.54260 | 3.63240  | 1.97070  |
| H | 0.48740  | 2.20050  | 1.83550  |
| C | -0.52330 | 4.24070  | -0.81660 |
| C | 1.10550  | 3.16470  | -2.09200 |
| C | -1.20880 | 4.01120  | -2.18100 |
| H | -2.10480 | 3.39850  | -2.08100 |
| C | 0.92020  | 4.46020  | -1.27850 |
| O | 1.69460  | 5.35570  | -1.07710 |
| H | -1.50330 | 4.96710  | -2.61910 |
| C | -0.10300 | 3.31110  | -3.04720 |
| H | -0.42320 | 2.33800  | -3.41870 |
| H | 0.17910  | 3.93040  | -3.90210 |
| C | 2.46000  | 2.98940  | -2.74730 |
| H | 2.48340  | 2.10530  | -3.39040 |
| H | 2.70030  | 3.86060  | -3.36190 |
| H | 3.24780  | 2.89080  | -1.99530 |
| H | -0.94360 | 5.03610  | -0.20440 |

## TS2

37

REACTION1\_A\_OBS\_MAJOR\_O\_BOUND\_TS\_DEF2\_TZVP\_SP\_TRIFLUOROETHANOL (OBS\_MAJOR)

|   |          |         |          |
|---|----------|---------|----------|
| C | -1.05890 | 3.26380 | 0.22790  |
| C | -2.34910 | 2.76890 | 0.06790  |
| C | -2.52720 | 1.55650 | -0.59890 |
| C | -1.42940 | 0.85530 | -1.11120 |

|   |          |          |          |
|---|----------|----------|----------|
| C | -0.12570 | 1.32050  | -0.93680 |
| C | 0.03570  | 2.51880  | -0.25120 |
| C | -0.52280 | 4.51450  | 0.78840  |
| C | 0.89060  | 4.29080  | 0.83550  |
| N | 1.20690  | 3.18630  | 0.14040  |
| H | -3.20170 | 3.31490  | 0.45510  |
| H | -3.52510 | 1.15470  | -0.72830 |
| H | -1.59050 | -0.07840 | -1.63730 |
| H | 0.72020  | 0.75870  | -1.31260 |
| H | 1.65640  | 4.94120  | 1.21950  |
| C | 2.56340  | 2.86550  | -0.28720 |
| H | 3.12530  | 2.39360  | 0.52210  |
| H | 2.52000  | 2.18800  | -1.13800 |
| H | 3.02700  | 3.80230  | -0.60260 |
| C | -1.26830 | 5.29360  | 1.84500  |
| H | -0.70340 | 6.17510  | 2.15580  |
| H | -2.23530 | 5.63230  | 1.46370  |
| H | -1.45400 | 4.67570  | 2.72810  |
| C | -0.51380 | 5.78370  | -0.80090 |
| C | 0.39030  | 4.71380  | -2.63150 |
| C | -1.67960 | 5.50240  | -1.71120 |
| H | -2.54750 | 5.06970  | -1.20720 |
| C | 0.73870  | 5.48260  | -1.51880 |
| O | 1.88680  | 5.76070  | -1.05610 |
| H | -2.01270 | 6.44770  | -2.15450 |
| C | -1.08850 | 4.57610  | -2.80020 |
| H | -1.40400 | 3.53270  | -2.65970 |
| H | -1.42990 | 4.86660  | -3.80300 |
| C | 1.37830  | 4.10930  | -3.56140 |
| H | 1.25440  | 3.01730  | -3.61180 |
| H | 1.25980  | 4.47930  | -4.58830 |
| H | 2.39120  | 4.34190  | -3.22580 |
| H | -0.53300 | 6.67010  | -0.17440 |

### TS3

37

| REACTION1 | _A       | OBS | MAJOR | INT | TS      | SP | TFE | DEF2 | TZVP     |
|-----------|----------|-----|-------|-----|---------|----|-----|------|----------|
| C         | -1.21920 |     |       |     | 1.64970 |    |     |      | 0.29260  |
| C         | -2.40200 |     |       |     | 1.69160 |    |     |      | 1.02850  |
| C         | -3.46630 |     |       |     | 0.89510 |    |     |      | 0.61540  |
| C         | -3.37610 |     |       |     | 0.08520 |    |     |      | -0.52710 |
| C         | -2.20920 |     |       |     | 0.03350 |    |     |      | -1.28160 |
| C         | -1.14440 |     |       |     | 0.81560 |    |     |      | -0.83890 |
| C         | 0.06400  |     |       |     | 2.37960 |    |     |      | 0.39590  |
| C         | 0.86850  |     |       |     | 1.77860 |    |     |      | -0.61240 |
| N         | 0.14610  |     |       |     | 0.93160 |    |     |      | -1.37210 |

|   |          |          |          |
|---|----------|----------|----------|
| H | -2.49770 | 2.37210  | 1.86110  |
| H | -4.39370 | 0.91770  | 1.17520  |
| H | -4.23080 | -0.50880 | -0.82950 |
| H | -2.13570 | -0.58680 | -2.16670 |
| H | 1.90740  | 1.96420  | -0.83630 |
| C | 0.59870  | 0.25280  | -2.57360 |
| H | 1.65210  | 0.47450  | -2.73800 |
| H | 0.47320  | -0.82690 | -2.46200 |
| H | 0.02260  | 0.58780  | -3.44000 |
| C | 0.65230  | 2.78570  | 1.72820  |
| H | 0.87990  | 1.90010  | 2.32810  |
| H | 1.57200  | 3.35820  | 1.59000  |
| H | -0.05530 | 3.40920  | 2.27440  |
| C | -0.35830 | 4.10100  | -0.51280 |
| C | -0.20360 | 5.92050  | 0.91320  |
| C | 0.88280  | 4.86410  | -0.92810 |
| H | 1.76690  | 4.23730  | -1.07380 |
| C | -1.06440 | 4.86410  | 0.55330  |
| O | -2.18790 | 4.57350  | 1.02550  |
| H | 0.68960  | 5.35080  | -1.89000 |
| C | 1.08460  | 5.93540  | 0.16750  |
| H | 1.94550  | 5.70260  | 0.81500  |
| H | 1.30630  | 6.91880  | -0.27100 |
| C | -0.60930 | 6.97430  | 1.87800  |
| H | 0.12470  | 7.07950  | 2.68930  |
| H | -0.68610 | 7.96260  | 1.40270  |
| H | -1.58020 | 6.71580  | 2.30590  |
| H | -0.97210 | 3.66330  | -1.29460 |

#### TS4

37

| REACTION1 | _A       | MAJOR | SECOND | TS       | _BS | HESSREF | _REDONE | _SP      | _TFE | _DEF2 | _TZVP |
|-----------|----------|-------|--------|----------|-----|---------|---------|----------|------|-------|-------|
| C         | -1.59140 |       |        | 2.07310  |     |         |         | -0.06780 |      |       |       |
| C         | -2.85490 |       |        | 2.25320  |     |         |         | 0.45740  |      |       |       |
| C         | -3.82060 |       |        | 1.25160  |     |         |         | 0.27250  |      |       |       |
| C         | -3.49140 |       |        | 0.08480  |     |         |         | -0.41100 |      |       |       |
| C         | -2.21390 |       |        | -0.10870 |     |         |         | -0.95590 |      |       |       |
| C         | -1.27370 |       |        | 0.89940  |     |         |         | -0.77170 |      |       |       |
| C         | -0.37360 |       |        | 2.96280  |     |         |         | -0.05860 |      |       |       |
| C         | 0.69460  |       |        | 2.12740  |     |         |         | -0.77740 |      |       |       |
| N         | 0.06990  |       |        | 0.91920  |     |         |         | -1.15500 |      |       |       |
| H         | -3.09680 |       |        | 3.14800  |     |         |         | 1.02150  |      |       |       |
| H         | -4.80230 |       |        | 1.35470  |     |         |         | 0.71790  |      |       |       |
| H         | -4.23820 |       |        | -0.69250 |     |         |         | -0.52980 |      |       |       |
| H         | -1.96940 |       |        | -1.02110 |     |         |         | -1.48560 |      |       |       |
| H         | 1.68470  |       |        | 2.00190  |     |         |         | -0.33530 |      |       |       |

|   |          |          |          |
|---|----------|----------|----------|
| C | 0.74610  | -0.18060 | -1.80140 |
| H | 1.82480  | -0.01870 | -1.76110 |
| H | 0.51060  | -1.11820 | -1.28900 |
| H | 0.46130  | -0.28070 | -2.85580 |
| C | 0.04980  | 3.26610  | 1.42100  |
| H | 0.93860  | 3.90130  | 1.43810  |
| H | -0.76550 | 3.78250  | 1.93160  |
| H | 0.25030  | 2.32750  | 1.94080  |
| C | -0.47090 | 4.28880  | -0.85940 |
| C | 1.08340  | 3.32970  | -2.29870 |
| C | -1.22070 | 4.13950  | -2.11750 |
| H | -2.19710 | 3.66700  | -1.98940 |
| C | 0.98850  | 4.45560  | -1.34220 |
| O | 1.86160  | 5.16070  | -0.89080 |
| H | -1.45500 | 5.12030  | -2.54890 |
| C | -0.24990 | 3.33540  | -3.06180 |
| H | -0.58890 | 2.30250  | -3.20200 |
| H | -0.16460 | 3.79980  | -4.04710 |
| H | -0.83990 | 5.07910  | -0.20450 |
| C | 2.36700  | 2.98990  | -2.98430 |
| H | 2.36360  | 1.99570  | -3.44300 |
| H | 2.59390  | 3.70300  | -3.78720 |
| H | 3.19790  | 3.05380  | -2.27450 |

## INT2

37

REACTION1\_A\_OBS\_MAJOR\_O\_BOUND\_DEF2\_TZVP\_SP\_TRIFLUOROETHANOL

|   |          |          |          |
|---|----------|----------|----------|
| C | -1.50150 | 1.95150  | -0.07120 |
| C | -2.70790 | 2.04020  | 0.60060  |
| C | -3.62710 | 0.98600  | 0.51090  |
| C | -3.31860 | -0.14080 | -0.24610 |
| C | -2.09280 | -0.25660 | -0.90900 |
| C | -1.18390 | 0.79230  | -0.79550 |
| C | -0.32790 | 2.91410  | -0.12070 |
| C | 0.59870  | 2.20870  | -1.18320 |
| N | 0.12200  | 0.86280  | -1.27860 |
| H | -2.94460 | 2.91850  | 1.19080  |
| H | -4.57850 | 1.05250  | 1.02470  |
| H | -4.03790 | -0.94860 | -0.32350 |
| H | -1.86100 | -1.14180 | -1.48820 |
| H | 1.66690  | 2.23550  | -0.95690 |
| C | 0.62290  | -0.01850 | -2.31330 |
| H | 1.69260  | 0.15580  | -2.44150 |
| H | 0.48260  | -1.06040 | -2.01560 |
| H | 0.12760  | 0.14750  | -3.27810 |
| C | 0.34500  | 3.03780  | 1.25080  |

|   |          |         |          |
|---|----------|---------|----------|
| H | 1.24460  | 3.65800 | 1.19120  |
| H | -0.34100 | 3.49890 | 1.96580  |
| H | 0.62310  | 2.05440 | 1.63790  |
| C | -0.60000 | 4.28070 | -0.80850 |
| C | -1.20550 | 4.64300 | -3.08970 |
| C | -1.95020 | 5.02130 | -0.81390 |
| H | -2.76260 | 4.30510 | -0.68620 |
| C | -0.43580 | 3.94530 | -2.25610 |
| O | 0.44300  | 2.92620 | -2.45530 |
| H | -2.03400 | 5.78190 | -0.03420 |
| C | -2.03490 | 5.60880 | -2.25570 |
| H | -3.07000 | 5.67370 | -2.60900 |
| H | -1.62640 | 6.62900 | -2.29550 |
| C | -1.28050 | 4.54510 | -4.57740 |
| H | -2.30850 | 4.35590 | -4.90870 |
| H | -0.95830 | 5.47550 | -5.06140 |
| H | -0.64630 | 3.73640 | -4.94720 |
| H | 0.20230  | 4.96640 | -0.49710 |

### INT3

37

| REACTION1 | A        | OBS | INT | MAJOR | SP       | TFE | DEF2 | TZVP     |
|-----------|----------|-----|-----|-------|----------|-----|------|----------|
| C         | -1.31130 |     |     |       | 1.74880  |     |      | 0.18020  |
| C         | -2.47290 |     |     |       | 1.83480  |     |      | 0.93680  |
| C         | -3.53680 |     |     |       | 0.98850  |     |      | 0.61830  |
| C         | -3.45800 |     |     |       | 0.08290  |     |      | -0.44610 |
| C         | -2.29990 |     |     |       | -0.02520 |     |      | -1.21140 |
| C         | -1.24560 |     |     |       | 0.81210  |     |      | -0.85930 |
| C         | -0.00490 |     |     |       | 2.51280  |     |      | 0.21750  |
| C         | 0.78910  |     |     |       | 1.76440  |     |      | -0.76810 |
| N         | 0.04860  |     |     |       | 0.87270  |     |      | -1.41990 |
| H         | -2.56120 |     |     |       | 2.57940  |     |      | 1.71350  |
| H         | -4.45090 |     |     |       | 1.04820  |     |      | 1.19660  |
| H         | -4.30870 |     |     |       | -0.54730 |     |      | -0.67790 |
| H         | -2.22840 |     |     |       | -0.72760 |     |      | -2.03260 |
| H         | 1.81890  |     |     |       | 1.93250  |     |      | -1.04220 |
| C         | 0.47320  |     |     |       | 0.06220  |     |      | -2.55080 |
| H         | 1.51960  |     |     |       | 0.26700  |     |      | -2.76980 |
| H         | 0.35220  |     |     |       | -0.99650 |     |      | -2.31110 |
| H         | -0.13460 |     |     |       | 0.30000  |     |      | -3.42680 |
| C         | 0.65010  |     |     |       | 2.64560  |     |      | 1.59570  |
| H         | 1.64740  |     |     |       | 3.08180  |     |      | 1.51060  |
| H         | 0.04770  |     |     |       | 3.31330  |     |      | 2.21470  |
| H         | 0.73310  |     |     |       | 1.67040  |     |      | 2.08070  |
| C         | -0.21620 |     |     |       | 4.00270  |     |      | -0.46650 |
| C         | -0.20840 |     |     |       | 5.84440  |     |      | 1.02780  |

|   |          |         |          |
|---|----------|---------|----------|
| C | 1.08970  | 4.78600 | -0.68620 |
| H | 1.98370  | 4.15820 | -0.75730 |
| C | -1.04990 | 4.86550 | 0.50010  |
| O | -2.26180 | 4.63820 | 0.72360  |
| H | 1.01470  | 5.32820 | -1.63200 |
| C | 1.18130  | 5.80090 | 0.48210  |
| H | 1.92470  | 5.48760 | 1.23400  |
| H | 1.52460  | 6.78300 | 0.12550  |
| C | -0.70280 | 6.92920 | 1.92050  |
| H | -0.10950 | 6.99760 | 2.84370  |
| H | -0.64810 | 7.92060 | 1.44620  |
| H | -1.74420 | 6.73380 | 2.18640  |
| H | -0.77260 | 3.81080 | -1.38590 |

**Reaction 8a + 7 (R<sup>2</sup> = CH<sub>3</sub>): observed regioisomer; minor stereoisomer**

**13a**

37

REACTION1\_A\_OBS\_MINOR\_SP\_TFE\_DEF2-TZVP

|   |          |          |          |
|---|----------|----------|----------|
| C | -1.39200 | 1.54270  | -0.10610 |
| C | -2.65840 | 1.70860  | 0.42630  |
| C | -3.64000 | 0.74160  | 0.18070  |
| C | -3.32670 | -0.38040 | -0.58370 |
| C | -2.05350 | -0.55620 | -1.13030 |
| C | -1.09070 | 0.42740  | -0.89940 |
| C | -0.15440 | 2.40080  | 0.07920  |
| C | 0.90530  | 1.65550  | -0.84130 |
| N | 0.21270  | 0.48320  | -1.38700 |
| H | -2.88530 | 2.57570  | 1.03830  |
| H | -4.63590 | 0.86090  | 0.58980  |
| H | -4.08530 | -1.13400 | -0.76440 |
| H | -1.83030 | -1.43160 | -1.72760 |
| H | 1.79420  | 1.34620  | -0.27700 |
| C | 0.96630  | -0.72780 | -1.64550 |
| H | 1.91450  | -0.47250 | -2.11860 |
| H | 1.17320  | -1.29970 | -0.72680 |
| H | 0.42080  | -1.37260 | -2.33720 |
| C | 0.25490  | 2.44820  | 1.55520  |
| H | 1.22760  | 2.92490  | 1.69740  |
| H | -0.48580 | 2.99360  | 2.14690  |
| H | 0.31780  | 1.43190  | 1.95170  |
| C | -0.30020 | 3.79420  | -0.60370 |
| C | 1.28340  | 2.70790  | -1.92360 |
| C | -0.08220 | 3.40510  | -2.07050 |
| C | 1.89890  | 2.18650  | -3.20320 |
| H | 1.25690  | 1.42550  | -3.65020 |
| H | 2.00480  | 2.99830  | -3.92710 |



|   |          |         |          |
|---|----------|---------|----------|
| H | 2.88930  | 1.75540 | -3.02620 |
| H | -1.24000 | 4.29920 | -0.39160 |
| O | -0.73770 | 3.61070 | -3.05310 |
| C | 0.97620  | 4.63950 | -0.40640 |
| H | 0.83190  | 5.62820 | -0.84900 |
| H | 1.23150  | 4.78970 | 0.64230  |
| C | 2.06710  | 3.83400 | -1.19430 |
| H | 2.82890  | 3.41200 | -0.53220 |
| H | 2.58080  | 4.46870 | -1.91920 |

### TS1'

37

REACTION1\_A\_OBS\_MINOR\_TS\_BS\_SP\_TFE\_DEF2\_TZVP(DIRECT)

|   |          |          |          |
|---|----------|----------|----------|
| C | -1.28190 | 1.46920  | 0.13020  |
| C | -2.65050 | 1.67070  | 0.26430  |
| C | -3.51200 | 0.94290  | -0.54920 |
| C | -3.01820 | 0.05090  | -1.50950 |
| C | -1.65190 | -0.15770 | -1.66610 |
| C | -0.80900 | 0.55030  | -0.82000 |
| C | -0.10020 | 2.11030  | 0.73940  |
| C | 0.99180  | 1.30190  | 0.29690  |
| N | 0.59270  | 0.52480  | -0.72630 |
| H | -3.03730 | 2.39150  | 0.97450  |
| H | -4.58220 | 1.08530  | -0.45880 |
| H | -3.71230 | -0.48350 | -2.14730 |
| H | -1.26950 | -0.83810 | -2.41670 |
| H | 2.03260  | 1.36960  | 0.56980  |
| C | 1.44530  | -0.31600 | -1.54690 |
| H | 2.48480  | -0.02940 | -1.39360 |
| H | 1.31430  | -1.36950 | -1.28560 |
| H | 1.19220  | -0.17050 | -2.59810 |
| C | -0.13180 | 2.71350  | 2.12390  |
| H | 0.79240  | 3.25360  | 2.34290  |
| H | -0.96100 | 3.41750  | 2.21880  |
| H | -0.26340 | 1.93760  | 2.88270  |
| C | 0.08540  | 3.70840  | -0.46410 |
| C | 0.88760  | 3.05050  | -2.53220 |
| C | -0.32280 | 3.32220  | -1.84330 |
| O | -1.49550 | 3.21330  | -2.25030 |
| C | 1.53330  | 4.12550  | -0.49670 |
| H | 1.59100  | 5.20670  | -0.66190 |
| H | 2.08340  | 3.91420  | 0.42670  |
| C | 2.09150  | 3.37640  | -1.72720 |
| H | 2.62740  | 2.46340  | -1.39510 |
| H | 2.83890  | 3.96510  | -2.27440 |
| H | -0.62430 | 4.29380  | 0.11280  |

|   |          |         |          |
|---|----------|---------|----------|
| C | 0.91370  | 2.57840 | -3.93910 |
| H | 1.33770  | 3.32670 | -4.62350 |
| H | 1.53030  | 1.67460 | -4.06100 |
| H | -0.10890 | 2.36290 | -4.25860 |

**TS2'**

37

|   | REACTION1 | _A | OBS      | MINOR | TS | _O | BOUND    | SP | TFE | DEF2     | TZVP |
|---|-----------|----|----------|-------|----|----|----------|----|-----|----------|------|
| C |           |    | -1.25700 |       |    |    | 1.52430  |    |     | 0.06860  |      |
| C |           |    | -2.51100 |       |    |    | 1.96410  |    |     | 0.48550  |      |
| C |           |    | -3.62510 |       |    |    | 1.17150  |    |     | 0.21400  |      |
| C |           |    | -3.49890 |       |    |    | -0.04260 |    |     | -0.47470 |      |
| C |           |    | -2.25440 |       |    |    | -0.50350 |    |     | -0.89940 |      |
| C |           |    | -1.14990 |       |    |    | 0.28940  |    |     | -0.60730 |      |
| C |           |    | 0.08280  |       |    |    | 2.12240  |    |     | 0.09490  |      |
| C |           |    | 0.93780  |       |    |    | 1.09400  |    |     | -0.39710 |      |
| N |           |    | 0.20510  |       |    |    | 0.07090  |    |     | -0.88140 |      |
| H |           |    | -2.61880 |       |    |    | 2.90340  |    |     | 1.01540  |      |
| H |           |    | -4.60600 |       |    |    | 1.49680  |    |     | 0.54040  |      |
| H |           |    | -4.38240 |       |    |    | -0.63700 |    |     | -0.67560 |      |
| H |           |    | -2.15500 |       |    |    | -1.44450 |    |     | -1.42690 |      |
| H |           |    | 2.00870  |       |    |    | 1.11180  |    |     | -0.49280 |      |
| C |           |    | 0.73060  |       |    |    | -1.05260 |    |     | -1.63880 |      |
| H |           |    | 1.77790  |       |    |    | -0.86140 |    |     | -1.86380 |      |
| H |           |    | 0.63270  |       |    |    | -1.98220 |    |     | -1.07170 |      |
| H |           |    | 0.18600  |       |    |    | -1.14810 |    |     | -2.58050 |      |
| C |           |    | 0.54510  |       |    |    | 3.12740  |    |     | 1.11570  |      |
| H |           |    | 1.47560  |       |    |    | 3.59710  |    |     | 0.78910  |      |
| H |           |    | -0.19960 |       |    |    | 3.91330  |    |     | 1.25640  |      |
| H |           |    | 0.71240  |       |    |    | 2.65210  |    |     | 2.08630  |      |
| C |           |    | -0.01170 |       |    |    | 3.18250  |    |     | -1.67740 |      |
| C |           |    | 1.64040  |       |    |    | 4.78110  |    |     | -1.78930 |      |
| C |           |    | 1.41190  |       |    |    | 3.41230  |    |     | -1.95810 |      |
| C |           |    | 2.96990  |       |    |    | 5.41200  |    |     | -1.99530 |      |
| H |           |    | 3.72480  |       |    |    | 4.63280  |    |     | -2.12210 |      |
| H |           |    | 2.98680  |       |    |    | 6.05460  |    |     | -2.88670 |      |
| H |           |    | 3.24600  |       |    |    | 6.05280  |    |     | -1.14730 |      |
| H |           |    | -0.51670 |       |    |    | 2.38720  |    |     | -2.21700 |      |
| O |           |    | 2.22180  |       |    |    | 2.47770  |    |     | -2.23140 |      |
| C |           |    | -0.72770 |       |    |    | 4.48950  |    |     | -1.48200 |      |
| H |           |    | -1.40910 |       |    |    | 4.66150  |    |     | -2.32220 |      |
| H |           |    | -1.35370 |       |    |    | 4.50980  |    |     | -0.58440 |      |
| C |           |    | 0.40140  |       |    |    | 5.55030  |    |     | -1.45980 |      |
| H |           |    | 0.48510  |       |    |    | 6.06160  |    |     | -0.48970 |      |
| H |           |    | 0.19530  |       |    |    | 6.34370  |    |     | -2.19250 |      |

**TS3'**

37

| REACTION1 | A | OBS      | INT | MINOR | TS       | SP | TFE | DEF2 | TZVP     |
|-----------|---|----------|-----|-------|----------|----|-----|------|----------|
| C         |   | -0.69890 |     |       | 1.40940  |    |     |      | 0.44080  |
| C         |   | -1.64080 |     |       | 1.48220  |    |     |      | 1.46120  |
| C         |   | -2.91080 |     |       | 0.95880  |    |     |      | 1.22300  |
| C         |   | -3.24480 |     |       | 0.38840  |    |     |      | -0.01250 |
| C         |   | -2.31450 |     |       | 0.31550  |    |     |      | -1.04820 |
| C         |   | -1.04800 |     |       | 0.82560  |    |     |      | -0.78820 |
| C         |   | 0.65360  |     |       | 1.99220  |    |     |      | 0.30620  |
| C         |   | 1.06270  |     |       | 1.54890  |    |     |      | -0.98940 |
| N         |   | 0.06590  |     |       | 0.91690  |    |     |      | -1.63940 |
| H         |   | -1.39350 |     |       | 1.98350  |    |     |      | 2.38940  |
| H         |   | -3.66220 |     |       | 1.01010  |    |     |      | 2.00210  |
| H         |   | -4.24530 |     |       | 0.00320  |    |     |      | -0.17050 |
| H         |   | -2.57620 |     |       | -0.11130 |    |     |      | -2.00890 |
| H         |   | 2.01490  |     |       | 1.71450  |    |     |      | -1.47220 |
| C         |   | 0.06120  |     |       | 0.52700  |    |     |      | -3.03780 |
| H         |   | 1.07330  |     |       | 0.59570  |    |     |      | -3.43410 |
| H         |   | -0.28910 |     |       | -0.50230 |    |     |      | -3.13460 |
| H         |   | -0.59670 |     |       | 1.18290  |    |     |      | -3.61610 |
| C         |   | 1.65170  |     |       | 1.98240  |    |     |      | 1.45840  |
| H         |   | 2.62520  |     |       | 2.34390  |    |     |      | 1.11560  |
| H         |   | 1.30380  |     |       | 2.63470  |    |     |      | 2.25930  |
| H         |   | 1.77620  |     |       | 0.96310  |    |     |      | 1.83280  |
| C         |   | 0.35370  |     |       | 3.88050  |    |     |      | 0.07120  |
| C         |   | -1.74330 |     |       | 4.65410  |    |     |      | 0.71000  |
| C         |   | -0.49840 |     |       | 4.27640  |    |     |      | 1.23960  |
| C         |   | -2.82530 |     |       | 5.23340  |    |     |      | 1.54780  |
| H         |   | -2.50010 |     |       | 5.26000  |    |     |      | 2.58990  |
| H         |   | -3.09400 |     |       | 6.25160  |    |     |      | 1.23300  |
| H         |   | -3.74590 |     |       | 4.63640  |    |     |      | 1.48050  |
| H         |   | 1.40260  |     |       | 4.16060  |    |     |      | 0.12200  |
| O         |   | -0.14660 |     |       | 4.21050  |    |     |      | 2.44540  |
| C         |   | -0.39340 |     |       | 4.22630  |    |     |      | -1.20200 |
| H         |   | 0.00350  |     |       | 5.16740  |    |     |      | -1.59570 |
| H         |   | -0.28450 |     |       | 3.48510  |    |     |      | -1.99900 |
| C         |   | -1.85850 |     |       | 4.43160  |    |     |      | -0.75730 |
| H         |   | -2.46870 |     |       | 3.54100  |    |     |      | -0.98370 |
| H         |   | -2.33370 |     |       | 5.26910  |    |     |      | -1.28570 |

**INT2'**

37

| REACTION1 | A | OBS      | MINOR | O | BOUND | SP      | TFE | DEF2 | TZVP     |
|-----------|---|----------|-------|---|-------|---------|-----|------|----------|
| C         |   | -1.39370 |       |   |       | 1.54720 |     |      | -0.10630 |
| C         |   | -2.65770 |       |   |       | 1.71260 |     |      | 0.42540  |

|   |          |          |          |
|---|----------|----------|----------|
| C | -3.63700 | 0.73820  | 0.18390  |
| C | -3.32790 | -0.37940 | -0.58590 |
| C | -2.05260 | -0.55720 | -1.13460 |
| C | -1.09240 | 0.42240  | -0.89500 |
| C | -0.17500 | 2.43690  | -0.04500 |
| C | 0.94170  | 1.48610  | -0.60130 |
| N | 0.22110  | 0.48400  | -1.35860 |
| H | -2.88840 | 2.58290  | 1.03070  |
| H | -4.62960 | 0.85110  | 0.60340  |
| H | -4.08580 | -1.13480 | -0.76210 |
| H | -1.82540 | -1.43600 | -1.72560 |
| H | 1.57230  | 1.03420  | 0.17580  |
| C | 0.93460  | -0.68120 | -1.83610 |
| H | 1.89630  | -0.35830 | -2.23600 |
| H | 1.10370  | -1.42730 | -1.04390 |
| H | 0.37870  | -1.15570 | -2.64720 |
| C | 0.16150  | 2.98070  | 1.34050  |
| H | 1.08830  | 3.56100  | 1.31830  |
| H | -0.63590 | 3.63060  | 1.70820  |
| H | 0.28160  | 2.16100  | 2.05260  |
| C | -0.16440 | 3.52100  | -1.17340 |
| C | 1.76340  | 4.64870  | -2.02040 |
| C | 1.26210  | 3.48190  | -1.61960 |
| C | 3.14060  | 4.94650  | -2.51430 |
| H | 3.77930  | 4.06310  | -2.44770 |
| H | 3.13110  | 5.27900  | -3.55960 |
| H | 3.60350  | 5.75140  | -1.93110 |
| H | -0.81500 | 3.15980  | -1.97960 |
| O | 1.83800  | 2.25760  | -1.42680 |
| C | -0.38310 | 5.02740  | -0.94640 |
| H | -1.40810 | 5.34750  | -1.14400 |
| H | -0.13960 | 5.29600  | 0.08400  |
| C | 0.65960  | 5.69100  | -1.89940 |
| H | 1.03420  | 6.64080  | -1.50170 |
| H | 0.21150  | 5.91740  | -2.87730 |

### INT3'

37

| REACTION1 | _A | OBS      | INT | MINOR | _SP     | TFE | DEF2 | _TZVP    |
|-----------|----|----------|-----|-------|---------|-----|------|----------|
| C         |    | -0.80170 |     |       | 1.45460 |     |      | 0.38730  |
| C         |    | -1.75130 |     |       | 1.49540 |     |      | 1.39880  |
| C         |    | -2.95410 |     |       | 0.81390 |     |      | 1.19860  |
| C         |    | -3.20820 |     |       | 0.11510 |     |      | 0.01360  |
| C         |    | -2.26030 |     |       | 0.06570 |     |      | -1.00940 |
| C         |    | -1.06870 |     |       | 0.74060 |     |      | -0.78430 |
| C         |    | 0.53150  |     |       | 2.14210 |     |      | 0.25160  |

|   |          |          |          |
|---|----------|----------|----------|
| C | 0.97190  | 1.63530  | -1.05460 |
| N | 0.04970  | 0.87330  | -1.64170 |
| H | -1.55810 | 2.06790  | 2.29830  |
| H | -3.71230 | 0.83690  | 1.97250  |
| H | -4.15550 | -0.39470 | -0.11590 |
| H | -2.45490 | -0.47010 | -1.93050 |
| H | 1.90230  | 1.86100  | -1.55550 |
| C | 0.09520  | 0.35440  | -2.99850 |
| H | 1.08300  | 0.53290  | -3.41980 |
| H | -0.10440 | -0.71880 | -2.99100 |
| H | -0.65730 | 0.85350  | -3.61550 |
| C | 1.53810  | 1.87950  | 1.39750  |
| H | 2.52630  | 2.24960  | 1.11180  |
| H | 1.21250  | 2.42240  | 2.28320  |
| H | 1.60970  | 0.80980  | 1.60630  |
| C | 0.35830  | 3.78430  | 0.14070  |
| C | -1.70530 | 4.74800  | 0.78570  |
| C | -0.51140 | 4.25900  | 1.31670  |
| C | -2.76560 | 5.37340  | 1.62210  |
| H | -2.44750 | 5.37490  | 2.66720  |
| H | -2.98370 | 6.40790  | 1.32010  |
| H | -3.71670 | 4.82490  | 1.54890  |
| H | 1.38520  | 4.14620  | 0.22280  |
| O | -0.17630 | 4.11260  | 2.52080  |
| C | -0.35810 | 4.29170  | -1.11890 |
| H | 0.09060  | 5.24400  | -1.41230 |
| H | -0.27430 | 3.61980  | -1.98070 |
| C | -1.82220 | 4.53250  | -0.68520 |
| H | -2.44520 | 3.65030  | -0.92100 |
| H | -2.27710 | 5.37750  | -1.21920 |

**Reaction 8a + 7 (R<sup>2</sup> = CH<sub>3</sub>): unobserved regioisomer; major stereoisomer**

**10**

37

REACTION1\_A\_NOTOBS\_1\_DEF2\_TZVP\_SP\_TRIFLUOROETHANOL

|   |          |          |          |
|---|----------|----------|----------|
| C | -1.49490 | 1.94770  | -0.03020 |
| C | -2.70550 | 2.04870  | 0.63080  |
| C | -3.64310 | 1.01330  | 0.51790  |
| C | -3.33850 | -0.11220 | -0.24310 |
| C | -2.11700 | -0.23080 | -0.91280 |
| C | -1.20190 | 0.81810  | -0.81330 |
| C | -0.31030 | 2.88770  | -0.02840 |
| C | 0.74290  | 2.11690  | -0.93290 |
| N | 0.03600  | 0.93930  | -1.43130 |
| H | -2.92290 | 2.91790  | 1.24220  |
| H | -4.59460 | 1.08270  | 1.03100  |

|   |          |          |          |
|---|----------|----------|----------|
| H | -4.05860 | -0.91970 | -0.31730 |
| H | -1.89520 | -1.11750 | -1.49380 |
| H | 1.61810  | 1.81810  | -0.34190 |
| C | 0.78690  | -0.19860 | -1.90920 |
| H | 1.62900  | 0.15210  | -2.50910 |
| H | 1.17740  | -0.82470 | -1.09120 |
| H | 0.16350  | -0.82250 | -2.55340 |
| C | 0.22540  | 3.10890  | 1.39340  |
| H | 1.10510  | 3.75950  | 1.39450  |
| H | -0.53450 | 3.56370  | 2.03220  |
| H | 0.50320  | 2.14990  | 1.83710  |
| C | -0.49840 | 4.24680  | -0.80450 |
| C | 1.16510  | 3.14630  | -2.01810 |
| C | -1.12730 | 3.96350  | -2.19600 |
| H | -2.00200 | 3.31840  | -2.11040 |
| C | 0.96890  | 4.44460  | -1.22530 |
| O | 1.72490  | 5.34710  | -0.98900 |
| H | -1.45090 | 4.90350  | -2.64850 |
| C | 0.01910  | 3.30270  | -3.03700 |
| H | -0.27790 | 2.34130  | -3.45400 |
| H | 0.33340  | 3.95340  | -3.85620 |
| C | -1.13210 | 5.39100  | -0.03890 |
| H | -2.15250 | 5.14270  | 0.26580  |
| H | -0.55460 | 5.64940  | 0.85000  |
| H | -1.17540 | 6.28350  | -0.66790 |
| H | 2.15950  | 3.00650  | -2.43670 |

## TS1

37

REACTION1\_A\_NOTOBS\_1\_TS\_DEF2\_TZVP\_SP\_TRIFLUOROETHANOL (DIRECT)

|   |          |          |          |
|---|----------|----------|----------|
| C | -1.42900 | 1.76970  | 0.21140  |
| C | -2.61140 | 1.98740  | 0.91590  |
| C | -3.66900 | 1.09680  | 0.74590  |
| C | -3.55950 | -0.00560 | -0.11290 |
| C | -2.37790 | -0.26130 | -0.80300 |
| C | -1.32920 | 0.62940  | -0.60420 |
| C | -0.15160 | 2.51870  | 0.12900  |
| C | 0.66060  | 1.65270  | -0.67880 |
| N | -0.01950 | 0.59300  | -1.11920 |
| H | -2.70660 | 2.83340  | 1.58470  |
| H | -4.59430 | 1.25730  | 1.28650  |
| H | -4.40220 | -0.67550 | -0.23410 |
| H | -2.28640 | -1.11910 | -1.45780 |
| H | 1.68130  | 1.83160  | -0.98270 |
| C | 0.43650  | -0.32910 | -2.14730 |
| H | 1.52340  | -0.29970 | -2.19810 |

|   |          |          |          |
|---|----------|----------|----------|
| H | 0.11750  | -1.34160 | -1.89940 |
| H | 0.02350  | -0.03940 | -3.11790 |
| C | 0.43240  | 3.10250  | 1.41430  |
| H | 1.27250  | 3.76390  | 1.20810  |
| H | -0.32380 | 3.69450  | 1.92950  |
| H | 0.72990  | 2.28920  | 2.08120  |
| C | -0.38690 | 4.03280  | -1.06680 |
| C | 1.49600  | 4.37490  | -2.41970 |
| C | -0.72600 | 3.51460  | -2.45140 |
| H | -1.30350 | 2.58440  | -2.45270 |
| C | 0.98660  | 4.71060  | -1.16510 |
| O | 1.42800  | 5.43320  | -0.24250 |
| H | -1.35100 | 4.26580  | -2.94370 |
| C | 0.63050  | 3.43350  | -3.18370 |
| H | 1.01110  | 2.38720  | -3.17050 |
| H | 0.52580  | 3.67850  | -4.24730 |
| C | -1.42590 | 4.87050  | -0.36500 |
| H | -2.37880 | 4.35890  | -0.22310 |
| H | -1.03770 | 5.25470  | 0.57770  |
| H | -1.60370 | 5.74300  | -1.00270 |
| H | 2.42240  | 4.78440  | -2.80160 |

## TS2

37

REACTION1\_A\_NOTOBS1\_O\_BOUND\_TS\_REDONE\_DEF2\_TZVP\_SP\_TRIFLUOROETHA  
NOL (NOTOBS\_MAJOR)

|   |          |          |          |
|---|----------|----------|----------|
| C | -1.21070 | 2.22760  | 0.03410  |
| C | -2.58970 | 2.06660  | 0.11840  |
| C | -3.18380 | 0.99120  | -0.54200 |
| C | -2.40780 | 0.09290  | -1.28320 |
| C | -1.02080 | 0.22080  | -1.35430 |
| C | -0.44480 | 1.28770  | -0.67620 |
| C | -0.28630 | 3.25010  | 0.56350  |
| C | 1.01280  | 2.68240  | 0.31560  |
| N | 0.91160  | 1.61220  | -0.48100 |
| H | -3.19300 | 2.76370  | 0.68850  |
| H | -4.25660 | 0.85060  | -0.48580 |
| H | -2.88900 | -0.73020 | -1.79830 |
| H | -0.42560 | -0.49250 | -1.91040 |
| H | 1.97530  | 3.06640  | 0.60350  |
| C | 2.05200  | 1.02720  | -1.18030 |
| H | 2.59710  | 1.85270  | -1.64420 |
| H | 2.68830  | 0.48120  | -0.48020 |
| H | 1.69440  | 0.34380  | -1.94700 |
| C | -0.61820 | 3.93240  | 1.87230  |
| H | 0.19100  | 4.58010  | 2.20930  |

|   |          |         |          |
|---|----------|---------|----------|
| H | -1.52220 | 4.53900 | 1.77850  |
| H | -0.80130 | 3.18350 | 2.64810  |
| C | -0.21750 | 4.69350 | -0.87500 |
| C | 0.01090  | 3.60530 | -2.91590 |
| C | -1.57120 | 4.76610 | -1.54630 |
| H | -2.40690 | 4.51480 | -0.88900 |
| C | 0.74930  | 4.11130 | -1.86260 |
| O | 1.99080  | 4.06410 | -1.60240 |
| H | -1.73060 | 5.80080 | -1.87030 |
| C | -1.46080 | 3.83940 | -2.78190 |
| H | -2.00870 | 2.89910 | -2.63330 |
| H | -1.90480 | 4.31640 | -3.66490 |
| C | 0.28420  | 5.90340 | -0.13350 |
| H | -0.40540 | 6.27010 | 0.62830  |
| H | 1.26600  | 5.70870 | 0.29970  |
| H | 0.41780  | 6.70160 | -0.87260 |
| H | 0.46260  | 3.12860 | -3.77800 |

#### TS4

37

| REACTION1 | _A       | MAJOR | SECOND | TS       | BS | HESSREF | REDONE | SP       | TFE | DEF2 | TZVP |
|-----------|----------|-------|--------|----------|----|---------|--------|----------|-----|------|------|
| C         | -1.59140 |       |        | 2.07310  |    |         |        | -0.06780 |     |      |      |
| C         | -2.85490 |       |        | 2.25320  |    |         |        | 0.45740  |     |      |      |
| C         | -3.82060 |       |        | 1.25160  |    |         |        | 0.27250  |     |      |      |
| C         | -3.49140 |       |        | 0.08480  |    |         |        | -0.41100 |     |      |      |
| C         | -2.21390 |       |        | -0.10870 |    |         |        | -0.95590 |     |      |      |
| C         | -1.27370 |       |        | 0.89940  |    |         |        | -0.77170 |     |      |      |
| C         | -0.37360 |       |        | 2.96280  |    |         |        | -0.05860 |     |      |      |
| C         | 0.69460  |       |        | 2.12740  |    |         |        | -0.77740 |     |      |      |
| N         | 0.06990  |       |        | 0.91920  |    |         |        | -1.15500 |     |      |      |
| H         | -3.09680 |       |        | 3.14800  |    |         |        | 1.02150  |     |      |      |
| H         | -4.80230 |       |        | 1.35470  |    |         |        | 0.71790  |     |      |      |
| H         | -4.23820 |       |        | -0.69250 |    |         |        | -0.52980 |     |      |      |
| H         | -1.96940 |       |        | -1.02110 |    |         |        | -1.48560 |     |      |      |
| H         | 1.68470  |       |        | 2.00190  |    |         |        | -0.33530 |     |      |      |
| C         | 0.74610  |       |        | -0.18060 |    |         |        | -1.80140 |     |      |      |
| H         | 1.82480  |       |        | -0.01870 |    |         |        | -1.76110 |     |      |      |
| H         | 0.51060  |       |        | -1.11820 |    |         |        | -1.28900 |     |      |      |
| H         | 0.46130  |       |        | -0.28070 |    |         |        | -2.85580 |     |      |      |
| C         | 0.04980  |       |        | 3.26610  |    |         |        | 1.42100  |     |      |      |
| H         | 0.93860  |       |        | 3.90130  |    |         |        | 1.43810  |     |      |      |
| H         | -0.76550 |       |        | 3.78250  |    |         |        | 1.93160  |     |      |      |
| H         | 0.25030  |       |        | 2.32750  |    |         |        | 1.94080  |     |      |      |
| C         | -0.47090 |       |        | 4.28880  |    |         |        | -0.85940 |     |      |      |
| C         | 1.08340  |       |        | 3.32970  |    |         |        | -2.29870 |     |      |      |
| C         | -1.22070 |       |        | 4.13950  |    |         |        | -2.11750 |     |      |      |



|   |          |         |          |
|---|----------|---------|----------|
| H | -2.19710 | 3.66700 | -1.98940 |
| C | 0.98850  | 4.45560 | -1.34220 |
| O | 1.86160  | 5.16070 | -0.89080 |
| H | -1.45500 | 5.12030 | -2.54890 |
| C | -0.24990 | 3.33540 | -3.06180 |
| H | -0.58890 | 2.30250 | -3.20200 |
| H | -0.16460 | 3.79980 | -4.04710 |
| H | -0.83990 | 5.07910 | -0.20450 |
| C | 2.36700  | 2.98990 | -2.98430 |
| H | 2.36360  | 1.99570 | -3.44300 |
| H | 2.59390  | 3.70300 | -3.78720 |
| H | 3.19790  | 3.05380 | -2.27450 |

## INT2

37

REACTION1\_A\_NOTOBS\_1\_O\_BOUND\_REDONE\_DEF2\_TZVP\_SP\_TRIFLUOROETHANO

L

|   |          |          |          |
|---|----------|----------|----------|
| C | -1.16270 | 2.23230  | -0.15710 |
| C | -2.53810 | 2.07930  | -0.11810 |
| C | -3.10000 | 0.81600  | -0.34470 |
| C | -2.27470 | -0.27670 | -0.59550 |
| C | -0.88290 | -0.14620 | -0.60170 |
| C | -0.34060 | 1.11300  | -0.35800 |
| C | -0.29330 | 3.45390  | 0.10990  |
| C | 1.12820  | 2.88460  | -0.25420 |
| N | 1.00200  | 1.46120  | -0.20540 |
| H | -3.18050 | 2.92850  | 0.08550  |
| H | -4.17620 | 0.69250  | -0.33030 |
| H | -2.71450 | -1.24980 | -0.78370 |
| H | -0.24950 | -1.00550 | -0.78370 |
| H | 1.94790  | 3.23210  | 0.37740  |
| C | 2.08520  | 0.61970  | -0.67380 |
| H | 3.03430  | 1.04870  | -0.34730 |
| H | 1.99690  | -0.37780 | -0.23700 |
| H | 2.10190  | 0.53250  | -1.76710 |
| C | -0.39880 | 3.83700  | 1.59350  |
| H | 0.33520  | 4.59250  | 1.87900  |
| H | -1.39640 | 4.22630  | 1.81210  |
| H | -0.24060 | 2.95410  | 2.21720  |
| C | -0.42760 | 4.62970  | -0.91900 |
| C | -0.01540 | 4.44360  | -3.26600 |
| C | -1.74680 | 4.94370  | -1.66070 |
| H | -2.38480 | 4.06200  | -1.68670 |
| C | 0.41240  | 4.10140  | -2.05360 |
| O | 1.44560  | 3.34150  | -1.61600 |
| H | -2.30750 | 5.76370  | -1.20430 |

|   |          |         |          |
|---|----------|---------|----------|
| C | -1.29150 | 5.25400 | -3.12100 |
| H | -2.05680 | 4.96330 | -3.84710 |
| H | -1.11650 | 6.32880 | -3.26640 |
| C | 0.20190  | 5.93120 | -0.37520 |
| H | -0.38570 | 6.33950 | 0.45090  |
| H | 1.22520  | 5.77220 | -0.02550 |
| H | 0.23750  | 6.68090 | -1.16860 |
| H | 0.45160  | 4.19160 | -4.20770 |

**Reaction 8a + 7 (R<sup>2</sup> = CH<sub>3</sub>): unobserved regioisomer; minor stereoisomer**

**TS2**

37

REACTION1\_A\_NOTOBS2\_O\_BOUND\_TS\_REDONE\_SP\_TFE\_DEF2\_TZVP

|   |          |          |          |
|---|----------|----------|----------|
| C | -1.70100 | 1.80350  | -0.19550 |
| C | -2.20530 | 1.97840  | 1.09040  |
| C | -3.39460 | 1.33910  | 1.43870  |
| C | -4.08180 | 0.53800  | 0.51730  |
| C | -3.59190 | 0.34420  | -0.77330 |
| C | -2.39720 | 0.97430  | -1.09810 |
| C | -0.56730 | 2.39560  | -0.91840 |
| C | -0.58130 | 1.72920  | -2.18560 |
| N | -1.67260 | 0.95000  | -2.29870 |
| H | -1.68610 | 2.60420  | 1.80690  |
| H | -3.79670 | 1.46310  | 2.43740  |
| H | -5.00750 | 0.05810  | 0.81210  |
| H | -4.12430 | -0.27100 | -1.48850 |
| H | 0.13860  | 1.80030  | -2.98060 |
| C | -2.11970 | 0.30300  | -3.51990 |
| H | -1.33980 | 0.39360  | -4.27330 |
| H | -2.32840 | -0.75240 | -3.33200 |
| H | -3.02490 | 0.78960  | -3.89270 |
| C | 0.74370  | 2.72100  | -0.24300 |
| H | 1.37210  | 3.32490  | -0.90060 |
| H | 0.58410  | 3.27400  | 0.68400  |
| H | 1.28180  | 1.80340  | 0.01180  |
| C | -1.32500 | 4.24690  | -1.52660 |
| C | 0.48860  | 5.49540  | -2.24020 |
| C | -0.37140 | 4.48870  | -2.65100 |
| O | -0.44080 | 3.80570  | -3.71430 |
| C | -1.06080 | 5.24200  | -0.42160 |
| H | -1.92000 | 5.91590  | -0.33840 |
| H | -0.95550 | 4.77660  | 0.56220  |
| C | 0.20320  | 6.02310  | -0.86860 |
| H | 1.04960  | 5.88490  | -0.18130 |
| H | -0.00790 | 7.10110  | -0.86340 |
| C | -2.75270 | 3.98600  | -1.91280 |

|   |          |         |          |
|---|----------|---------|----------|
| H | -3.37610 | 3.66680 | -1.07650 |
| H | -3.15640 | 4.93140 | -2.29440 |
| H | -2.80820 | 3.26900 | -2.73090 |
| H | 1.25530  | 5.91020 | -2.88400 |

**Reaction 8a + 11 (R<sup>2</sup> = H): observed regioisomer; major stereoisomer**

**15a**

34

BROMO\_H\_OXALLYL\_MAJOR\_PROD

|    |          |          |          |
|----|----------|----------|----------|
| C  | -1.52840 | 1.96470  | -0.07940 |
| C  | -2.74420 | 2.07430  | 0.57060  |
| C  | -3.68100 | 1.03910  | 0.45750  |
| C  | -3.37220 | -0.09140 | -0.29530 |
| C  | -2.14800 | -0.21410 | -0.95860 |
| C  | -1.23290 | 0.83420  | -0.85790 |
| C  | -0.34250 | 2.90200  | -0.07040 |
| C  | 0.70430  | 2.13100  | -0.98570 |
| N  | 0.01020  | 0.94720  | -1.47110 |
| H  | -2.96610 | 2.95010  | 1.17160  |
| H  | -4.63630 | 1.11250  | 0.96270  |
| H  | -4.09300 | -0.89820 | -0.36990 |
| H  | -1.92370 | -1.10170 | -1.53690 |
| H  | 1.60490  | 1.86270  | -0.42330 |
| C  | 0.76860  | -0.20950 | -1.90610 |
| H  | 1.65330  | 0.12780  | -2.44490 |
| H  | 1.08350  | -0.84400 | -1.06360 |
| H  | 0.17240  | -0.81520 | -2.59200 |
| C  | 0.19310  | 3.14440  | 1.34640  |
| H  | 1.08590  | 3.77630  | 1.33310  |
| H  | -0.56490 | 3.64280  | 1.95660  |
| H  | 0.44490  | 2.19610  | 1.82630  |
| C  | -0.52480 | 4.25800  | -0.82650 |
| C  | 1.06840  | 3.17660  | -2.07340 |
| C  | -1.19680 | 4.03930  | -2.20240 |
| H  | -2.09260 | 3.42530  | -2.11320 |
| C  | 0.92710  | 4.48400  | -1.26040 |
| O  | 1.70440  | 5.36390  | -1.04070 |
| H  | -1.48280 | 4.99810  | -2.63790 |
| C  | -0.08680 | 3.34370  | -3.07000 |
| H  | -0.40160 | 2.37900  | -3.46280 |
| H  | 0.22920  | 3.97840  | -3.89800 |
| H  | -0.94950 | 5.05280  | -0.21680 |
| Br | 2.84490  | 2.87300  | -2.92340 |

## TS2

34

BROMO\_H\_OXALLYL\_MAJOR\_O\_BOUND\_TS\_BS

|    |          |         |          |
|----|----------|---------|----------|
| C  | -0.85970 | 3.43470 | 0.22820  |
| C  | -2.13860 | 2.89090 | 0.14510  |
| C  | -2.32810 | 1.73880 | -0.61720 |
| C  | -1.25810 | 1.14790 | -1.30120 |
| C  | 0.03500  | 1.66150 | -1.20820 |
| C  | 0.21090  | 2.79310 | -0.42250 |
| C  | -0.32220 | 4.65570 | 0.84240  |
| C  | 1.09390  | 4.51000 | 0.72150  |
| N  | 1.38640  | 3.49010 | -0.09630 |
| H  | -2.97150 | 3.35370 | 0.66220  |
| H  | -3.31540 | 1.29850 | -0.69020 |
| H  | -1.43320 | 0.26470 | -1.90400 |
| H  | 0.86150  | 1.19660 | -1.72980 |
| H  | 1.86320  | 5.17760 | 1.06870  |
| C  | 2.70040  | 3.25220 | -0.68360 |
| H  | 3.20250  | 4.21530 | -0.76450 |
| H  | 3.27270  | 2.54280 | -0.08160 |
| H  | 2.56840  | 2.86540 | -1.69310 |
| C  | -0.99410 | 5.33940 | 2.00560  |
| H  | -0.43260 | 6.22040 | 2.32360  |
| H  | -2.00260 | 5.66290 | 1.73450  |
| H  | -1.08010 | 4.66100 | 2.85930  |
| C  | -0.50150 | 6.05940 | -0.68220 |
| C  | 0.24690  | 5.13420 | -2.60480 |
| C  | -1.73590 | 5.77270 | -1.49310 |
| H  | -2.53060 | 5.27260 | -0.93430 |
| C  | 0.70990  | 5.87580 | -1.51500 |
| O  | 1.86460  | 6.20200 | -1.14840 |
| H  | -2.14780 | 6.72420 | -1.84800 |
| C  | -1.22510 | 4.93140 | -2.68830 |
| H  | -1.48700 | 3.87120 | -2.58800 |
| H  | -1.64750 | 5.27680 | -3.63850 |
| H  | -0.50160 | 6.89100 | 0.01490  |
| Br | 1.40630  | 4.43690 | -3.97740 |

## INT2

34

BROMO\_H\_OXALLYL\_MAJOR\_O\_BOUND

|   |          |         |          |
|---|----------|---------|----------|
| C | -0.68120 | 3.09340 | 0.18860  |
| C | -1.94560 | 2.53800 | 0.09420  |
| C | -2.07750 | 1.16640 | -0.15800 |
| C | -0.94120 | 0.37500 | -0.30430 |
| C | 0.34170  | 0.91700 | -0.18320 |

|    |          |          |          |
|----|----------|----------|----------|
| C  | 0.45540  | 2.27870  | 0.08340  |
| C  | -0.25220 | 4.51910  | 0.48770  |
| C  | 1.30670  | 4.41020  | 0.29390  |
| N  | 1.61100  | 3.01770  | 0.34550  |
| H  | -2.82860 | 3.15610  | 0.21260  |
| H  | -3.06260 | 0.72430  | -0.24510 |
| H  | -1.04850 | -0.68370 | -0.51190 |
| H  | 1.21750  | 0.28940  | -0.29020 |
| H  | 1.90910  | 4.98190  | 1.00200  |
| C  | 2.93760  | 2.55200  | -0.01180 |
| H  | 3.67800  | 3.23950  | 0.40080  |
| H  | 3.11350  | 1.56490  | 0.42080  |
| H  | 3.07900  | 2.50100  | -1.09790 |
| C  | -0.63690 | 4.92960  | 1.91350  |
| H  | -0.24410 | 5.92160  | 2.15590  |
| H  | -1.72440 | 4.95730  | 2.01630  |
| H  | -0.24890 | 4.21220  | 2.64040  |
| C  | -0.62520 | 5.57880  | -0.58540 |
| C  | 0.08520  | 5.67710  | -2.82630 |
| C  | -1.88240 | 5.53960  | -1.47620 |
| H  | -2.21220 | 4.50790  | -1.59980 |
| C  | 0.47850  | 5.41090  | -1.58500 |
| O  | 1.62600  | 4.97530  | -1.03650 |
| H  | -2.71360 | 6.12680  | -1.08080 |
| C  | -1.37650 | 6.06160  | -2.85790 |
| H  | -1.90570 | 5.59610  | -3.69300 |
| H  | -1.50450 | 7.14710  | -2.95620 |
| H  | -0.53120 | 6.56870  | -0.11480 |
| Br | 1.18590  | 5.61590  | -4.41110 |

#### TS4

34

|   | BROMO_H_OXALLYL_MAJOR_SECOND_TS_BS | HESSREF_SP |          |
|---|------------------------------------|------------|----------|
| C | -1.57410                           | 2.01720    | -0.01730 |
| C | -2.85430                           | 2.18120    | 0.48280  |
| C | -3.83740                           | 1.20300    | 0.26500  |
| C | -3.52670                           | 0.04760    | -0.44660 |
| C | -2.23330                           | -0.14340   | -0.95770 |
| C | -1.29290                           | 0.84790    | -0.73300 |
| C | -0.38020                           | 2.89000    | 0.03940  |
| C | 0.68950                            | 2.05700    | -0.74820 |
| N | 0.04530                            | 0.87960    | -1.13610 |
| H | -3.08290                           | 3.08910    | 1.03300  |
| H | -4.83040                           | 1.34310    | 0.67530  |
| H | -4.27820                           | -0.70940   | -0.64090 |
| H | -1.98750                           | -1.03640   | -1.51760 |

|    |          |          |          |
|----|----------|----------|----------|
| H  | 1.69890  | 1.92030  | -0.36670 |
| C  | 0.69940  | -0.22460 | -1.81420 |
| H  | 1.75110  | 0.02280  | -1.95480 |
| H  | 0.63560  | -1.15230 | -1.23570 |
| H  | 0.25300  | -0.38790 | -2.80010 |
| C  | 0.09450  | 3.21410  | 1.44250  |
| H  | 0.98210  | 3.85220  | 1.41640  |
| H  | -0.70440 | 3.72950  | 1.98660  |
| H  | 0.36370  | 2.32610  | 2.02360  |
| C  | -0.48050 | 4.19220  | -0.81000 |
| C  | 1.05630  | 3.28990  | -2.25030 |
| C  | -1.23870 | 3.98560  | -2.23220 |
| H  | -2.18170 | 3.45100  | -2.13740 |
| C  | 0.99530  | 4.42350  | -1.32670 |
| O  | 1.84080  | 5.18540  | -0.93630 |
| H  | -1.40940 | 5.00150  | -2.59290 |
| C  | -0.21880 | 3.23530  | -3.07870 |
| H  | -0.55680 | 2.21620  | -3.25210 |
| H  | -0.03240 | 3.76680  | -4.01420 |
| H  | -0.90900 | 5.01250  | -0.23060 |
| Br | 2.72430  | 3.04260  | -3.19540 |

**Reaction 8a + 11 (R<sup>2</sup> = H): observed regioisomer; minor stereoisomer**

**16a**

34

BROMO\_H\_OXALLYL\_MINOR\_PROD

|   |          |          |          |
|---|----------|----------|----------|
| C | -1.38600 | 1.67930  | -0.16390 |
| C | -2.73490 | 1.63890  | 0.13300  |
| C | -3.44130 | 0.44170  | -0.04460 |
| C | -2.77580 | -0.69050 | -0.50860 |
| C | -1.41250 | -0.66210 | -0.81550 |
| C | -0.72580 | 0.54050  | -0.64700 |
| C | -0.39600 | 2.82020  | -0.00610 |
| C | 0.94100  | 2.18190  | -0.60150 |
| N | 0.60850  | 0.80080  | -0.89570 |
| H | -3.24180 | 2.52260  | 0.50710  |
| H | -4.49990 | 0.39720  | 0.18040  |
| H | -3.32480 | -1.61610 | -0.64250 |
| H | -0.90940 | -1.54560 | -1.18830 |
| H | 1.78540  | 2.24670  | 0.09350  |
| C | 1.59620  | -0.24830 | -1.03460 |
| H | 2.59300  | 0.18570  | -0.97450 |
| H | 1.48500  | -1.00020 | -0.24190 |
| H | 1.51660  | -0.74700 | -2.00580 |
| C | -0.25880 | 3.23300  | 1.46130  |
| H | 0.54990  | 3.95130  | 1.61490  |

|    |          |         |          |
|----|----------|---------|----------|
| H  | -1.18940 | 3.67750 | 1.82470  |
| H  | -0.04760 | 2.35170 | 2.07160  |
| C  | -0.71420 | 3.98760 | -0.99030 |
| C  | 1.21520  | 3.08130 | -1.83700 |
| C  | -0.22310 | 3.38040 | -2.31150 |
| Br | 2.43510  | 2.30150 | -3.19900 |
| H  | -1.75840 | 4.29140 | -0.99040 |
| O  | -0.75480 | 3.22460 | -3.36770 |
| C  | 0.31550  | 5.13000 | -0.85300 |
| H  | 0.03520  | 5.95870 | -1.50700 |
| H  | 0.38250  | 5.52220 | 0.16110  |
| C  | 1.65530  | 4.47440 | -1.34100 |
| H  | 2.39710  | 4.38280 | -0.54450 |
| H  | 2.10520  | 5.04300 | -2.15360 |

## TS2

34

BROMO\_H\_OXALLYL\_MINOR\_O\_BOUND\_TS\_LH

|    |          |          |          |
|----|----------|----------|----------|
| C  | -1.23320 | 1.48920  | 0.03890  |
| C  | -2.48310 | 1.94020  | 0.45970  |
| C  | -3.60460 | 1.16010  | 0.18570  |
| C  | -3.49140 | -0.05360 | -0.50700 |
| C  | -2.25250 | -0.52650 | -0.93360 |
| C  | -1.13980 | 0.25440  | -0.64020 |
| C  | 0.11150  | 2.06730  | 0.07220  |
| C  | 0.95270  | 1.04260  | -0.43790 |
| N  | 0.21230  | 0.02460  | -0.91950 |
| H  | -2.58090 | 2.87660  | 0.99660  |
| H  | -4.58190 | 1.49380  | 0.51380  |
| H  | -4.38120 | -0.63780 | -0.70920 |
| H  | -2.16330 | -1.46700 | -1.46360 |
| H  | 2.02240  | 1.06100  | -0.55270 |
| C  | 0.72530  | -1.09780 | -1.68890 |
| H  | 1.77920  | -0.92540 | -1.89750 |
| H  | 0.60200  | -2.03230 | -1.13580 |
| H  | 0.19030  | -1.16890 | -2.63830 |
| C  | 0.58570  | 3.09300  | 1.06390  |
| H  | 1.53320  | 3.52860  | 0.73990  |
| H  | -0.14060 | 3.90140  | 1.16940  |
| H  | 0.72600  | 2.64480  | 2.05170  |
| C  | 0.02900  | 3.13230  | -1.75780 |
| C  | 1.60950  | 4.74590  | -1.79540 |
| C  | 1.46070  | 3.37110  | -2.01230 |
| Br | 3.29640  | 5.64880  | -1.97180 |
| H  | -0.45170 | 2.31490  | -2.28560 |
| O  | 2.28050  | 2.46370  | -2.28500 |

|   |          |         |          |
|---|----------|---------|----------|
| C | -0.72460 | 4.41580 | -1.56430 |
| H | -1.38280 | 4.58270 | -2.42380 |
| H | -1.37730 | 4.40310 | -0.68610 |
| C | 0.36950  | 5.51050 | -1.48860 |
| H | 0.42250  | 5.99870 | -0.50770 |
| H | 0.17860  | 6.30610 | -2.21880 |

## INT2

34

BROMO\_H\_OXALLYL\_MINOR\_O\_BOUND

|    |          |          |          |
|----|----------|----------|----------|
| C  | -1.38660 | 1.54750  | -0.09100 |
| C  | -2.65190 | 1.71480  | 0.43780  |
| C  | -3.63220 | 0.74390  | 0.18870  |
| C  | -3.32340 | -0.37100 | -0.58550 |
| C  | -2.04700 | -0.55020 | -1.13070 |
| C  | -1.08540 | 0.42540  | -0.88260 |
| C  | -0.16490 | 2.43300  | -0.02210 |
| C  | 0.94900  | 1.47900  | -0.57700 |
| N  | 0.23230  | 0.48290  | -1.33880 |
| H  | -2.88220 | 2.58270  | 1.04660  |
| H  | -4.62570 | 0.85690  | 0.60560  |
| H  | -4.08270 | -1.12350 | -0.76730 |
| H  | -1.82000 | -1.42720 | -1.72410 |
| H  | 1.58520  | 1.03020  | 0.19620  |
| C  | 0.94480  | -0.68580 | -1.81300 |
| H  | 1.91020  | -0.36740 | -2.20730 |
| H  | 1.10510  | -1.43200 | -1.01980 |
| H  | 0.39110  | -1.15630 | -2.62740 |
| C  | 0.16890  | 2.97680  | 1.36380  |
| H  | 1.09850  | 3.55260  | 1.34670  |
| H  | -0.62770 | 3.62990  | 1.72750  |
| H  | 0.28170  | 2.15690  | 2.07650  |
| C  | -0.15170 | 3.51740  | -1.15030 |
| C  | 1.72720  | 4.64450  | -2.00900 |
| C  | 1.27680  | 3.46320  | -1.59970 |
| Br | 3.49140  | 5.02810  | -2.69200 |
| H  | -0.79700 | 3.15740  | -1.96060 |
| O  | 1.85110  | 2.25610  | -1.40370 |
| C  | -0.37410 | 5.02500  | -0.92360 |
| H  | -1.40210 | 5.33880  | -1.11240 |
| H  | -0.11830 | 5.29680  | 0.10240  |
| C  | 0.65000  | 5.70040  | -1.89080 |
| H  | 1.04070  | 6.64040  | -1.49340 |
| H  | 0.19890  | 5.92260  | -2.86580 |



**Reaction 8a + 11 (R<sup>2</sup> = H): unobserved regioisomer; major stereoisomer**

**TS2**

34

BROMO\_H\_OXALLYL\_NOTOBS\_O\_BOUND\_TS\_LH

|    |          |         |          |
|----|----------|---------|----------|
| C  | -0.85480 | 3.50710 | 0.19080  |
| C  | -2.13530 | 2.96600 | 0.11260  |
| C  | -2.32390 | 1.79050 | -0.61160 |
| C  | -1.24620 | 1.16720 | -1.25350 |
| C  | 0.04780  | 1.67810 | -1.16190 |
| C  | 0.22080  | 2.84340 | -0.42450 |
| C  | -0.32180 | 4.71820 | 0.83330  |
| C  | 1.10040  | 4.56600 | 0.72120  |
| N  | 1.39860  | 3.53350 | -0.07660 |
| H  | -2.96890 | 3.44880 | 0.60930  |
| H  | -3.31280 | 1.35360 | -0.68250 |
| H  | -1.41530 | 0.25830 | -1.81890 |
| H  | 0.87710  | 1.17600 | -1.64370 |
| H  | 1.86850  | 5.22250 | 1.09170  |
| C  | 2.73100  | 3.31180 | -0.63260 |
| H  | 3.04260  | 4.24940 | -1.09940 |
| H  | 3.42490  | 3.02470 | 0.16000  |
| H  | 2.68730  | 2.51740 | -1.37380 |
| C  | -0.99430 | 5.27470 | 2.06290  |
| H  | -0.41240 | 6.07730 | 2.51150  |
| H  | -1.98180 | 5.67430 | 1.82180  |
| H  | -1.12030 | 4.47820 | 2.80230  |
| C  | -0.47550 | 6.16910 | -0.68380 |
| C  | 0.24220  | 5.21840 | -2.63560 |
| C  | -1.73430 | 5.90460 | -1.46600 |
| H  | -2.51910 | 5.42440 | -0.87850 |
| C  | 0.72830  | 5.91290 | -1.53560 |
| O  | 1.90080  | 6.18780 | -1.17420 |
| H  | -2.13510 | 6.85640 | -1.82230 |
| C  | -1.24230 | 5.05060 | -2.66110 |
| H  | -1.53160 | 3.99750 | -2.55170 |
| H  | -1.69790 | 5.40240 | -3.59520 |
| Br | -0.43110 | 7.88460 | 0.30050  |
| H  | 0.89060  | 4.87550 | -3.43330 |

**INT2**

34

BROMO\_H\_OXALLYL\_NOTOBS\_O\_BOUND

|   |          |         |          |
|---|----------|---------|----------|
| C | -0.69930 | 3.13070 | 0.15120  |
| C | -1.95750 | 2.57030 | 0.01850  |
| C | -2.07570 | 1.19390 | -0.21170 |

|    |          |          |          |
|----|----------|----------|----------|
| C  | -0.93340 | 0.40150  | -0.29100 |
| C  | 0.34170  | 0.94870  | -0.12340 |
| C  | 0.44290  | 2.31630  | 0.11720  |
| C  | -0.27310 | 4.56120  | 0.48970  |
| C  | 1.27750  | 4.44760  | 0.26560  |
| N  | 1.58500  | 3.06240  | 0.41540  |
| H  | -2.84720 | 3.18450  | 0.09620  |
| H  | -3.05580 | 0.74820  | -0.33050 |
| H  | -1.03040 | -0.66170 | -0.48020 |
| H  | 1.22240  | 0.32110  | -0.17520 |
| H  | 1.88770  | 5.08020  | 0.90910  |
| C  | 2.92380  | 2.58290  | 0.12900  |
| H  | 3.64760  | 3.29170  | 0.53470  |
| H  | 3.08430  | 1.61890  | 0.61640  |
| H  | 3.10520  | 2.47640  | -0.94750 |
| C  | -0.65820 | 4.86740  | 1.94070  |
| H  | -0.23380 | 5.81060  | 2.27980  |
| H  | -1.74500 | 4.92460  | 2.03260  |
| H  | -0.30420 | 4.06040  | 2.58580  |
| C  | -0.65330 | 5.57490  | -0.60740 |
| C  | -0.03870 | 5.62370  | -2.87580 |
| C  | -1.94720 | 5.64760  | -1.40720 |
| H  | -2.34440 | 4.63520  | -1.50070 |
| C  | 0.38490  | 5.35970  | -1.63670 |
| O  | 1.53940  | 4.89040  | -1.12030 |
| H  | -2.70690 | 6.28460  | -0.95750 |
| C  | -1.46930 | 6.11640  | -2.81130 |
| H  | -2.09660 | 5.70820  | -3.60860 |
| H  | -1.51370 | 7.21010  | -2.88660 |
| Br | -0.29880 | 7.55920  | 0.14900  |
| H  | 0.54300  | 5.53640  | -3.78220 |

### Product

34

BROMO\_H\_OXALLYL\_NOTOBS\_PROD

|   |          |          |          |
|---|----------|----------|----------|
| C | -1.53360 | 1.97240  | -0.08620 |
| C | -2.74840 | 2.08940  | 0.56460  |
| C | -3.68840 | 1.05810  | 0.44740  |
| C | -3.38330 | -0.07310 | -0.30620 |
| C | -2.16000 | -0.20010 | -0.97090 |
| C | -1.24130 | 0.84480  | -0.86910 |
| C | -0.34770 | 2.90590  | -0.07690 |
| C | 0.69970  | 2.14710  | -1.00250 |
| N | -0.00270 | 0.96620  | -1.49530 |
| H | -2.96500 | 2.97430  | 1.15200  |
| H | -4.64530 | 1.13600  | 0.94870  |

|    |          |          |          |
|----|----------|----------|----------|
| H  | -4.10770 | -0.87650 | -0.38270 |
| H  | -1.94230 | -1.08740 | -1.55230 |
| H  | 1.58330  | 1.85910  | -0.42050 |
| C  | 0.76380  | -0.18140 | -1.92920 |
| H  | 1.60360  | 0.15570  | -2.53990 |
| H  | 1.15770  | -0.77150 | -1.08690 |
| H  | 0.14860  | -0.83460 | -2.55110 |
| C  | 0.20950  | 3.12130  | 1.33560  |
| H  | 1.08550  | 3.77590  | 1.32410  |
| H  | -0.54100 | 3.57520  | 1.98280  |
| H  | 0.49510  | 2.15740  | 1.76250  |
| C  | -0.53010 | 4.24110  | -0.86600 |
| C  | 1.10340  | 3.18520  | -2.09100 |
| C  | -1.19480 | 4.01110  | -2.23750 |
| H  | -2.07960 | 3.38340  | -2.14190 |
| C  | 0.93650  | 4.48310  | -1.28970 |
| O  | 1.69100  | 5.38060  | -1.06200 |
| H  | -1.49720 | 4.96710  | -2.66360 |
| C  | -0.06060 | 3.34250  | -3.09140 |
| H  | -0.36700 | 2.37800  | -3.49300 |
| H  | 0.23760  | 3.98940  | -3.91850 |
| Br | -1.39660 | 5.71150  | 0.16310  |
| H  | 2.08970  | 3.04590  | -2.52760 |

#### TS4

34

BROMO\_H\_OXALLYL\_NOTOBS\_SECOND\_TS\_BS\_HESSREF\_SP\_DEF2\_TZVP\_TFE

|   |          |          |          |
|---|----------|----------|----------|
| C | -1.52790 | 2.04390  | 0.00270  |
| C | -2.79210 | 2.22440  | 0.52640  |
| C | -3.78020 | 1.25040  | 0.32720  |
| C | -3.46030 | 0.10630  | -0.40050 |
| C | -2.18210 | -0.10060 | -0.93530 |
| C | -1.22130 | 0.88050  | -0.71830 |
| C | -0.30470 | 2.94570  | 0.04410  |
| C | 0.74630  | 2.09180  | -0.74860 |
| N | 0.11330  | 0.89810  | -1.12630 |
| H | -3.00870 | 3.15750  | 1.03590  |
| H | -4.78270 | 1.37550  | 0.71630  |
| H | -4.22160 | -0.64930 | -0.55900 |
| H | -1.95850 | -0.99770 | -1.50030 |
| H | 1.72640  | 1.98460  | -0.28700 |
| C | 0.78180  | -0.19400 | -1.79330 |
| H | 1.86050  | -0.04790 | -1.72060 |
| H | 0.52980  | -1.14330 | -1.31010 |
| H | 0.51520  | -0.25990 | -2.85490 |
| C | 0.18430  | 3.19100  | 1.48320  |

|    |          |         |          |
|----|----------|---------|----------|
| H  | 1.04660  | 3.86320 | 1.48790  |
| H  | -0.59550 | 3.64310 | 2.09600  |
| H  | 0.46830  | 2.23790 | 1.93620  |
| C  | -0.43720 | 4.23720 | -0.80880 |
| C  | 1.11980  | 3.32830 | -2.24610 |
| C  | -1.19270 | 4.02150 | -2.15040 |
| H  | -2.13550 | 3.49650 | -2.01720 |
| C  | 0.98900  | 4.46700 | -1.29090 |
| O  | 1.82050  | 5.22350 | -0.85630 |
| H  | -1.40060 | 5.00900 | -2.56380 |
| C  | -0.16640 | 3.25450 | -3.04540 |
| H  | -0.47210 | 2.21560 | -3.20610 |
| H  | -0.07060 | 3.71530 | -4.03210 |
| Br | -1.23790 | 5.75350 | 0.18540  |
| H  | 2.09170  | 3.14760 | -2.69100 |

**Reaction 8a + 11 (R<sup>2</sup> = H): unobserved regioisomer; minor stereoisomer**

**TS2**

34

|   | BROMO_H_OXALLYL | NOTOBS_MINOR_O_BOUND | TS_BS    |
|---|-----------------|----------------------|----------|
| C | -1.33870        | 1.42950              | 0.18000  |
| C | -2.58020        | 1.89060              | 0.61250  |
| C | -3.69510        | 1.07480              | 0.43510  |
| C | -3.58020        | -0.18620             | -0.16630 |
| C | -2.34740        | -0.66980             | -0.59750 |
| C | -1.24490        | 0.15240              | -0.40530 |
| C | -0.00380        | 2.02830              | 0.13920  |
| C | 0.84140         | 0.98190              | -0.33930 |
| N | 0.10720         | -0.07670             | -0.71090 |
| H | -2.67820        | 2.86300              | 1.08100  |
| H | -4.66810        | 1.41730              | 0.76720  |
| H | -4.46540        | -0.79740             | -0.29660 |
| H | -2.25950        | -1.64060             | -1.06910 |
| H | 1.90440         | 1.02590              | -0.50810 |
| C | 0.59450         | -1.20310             | -1.48960 |
| H | 1.68220         | -1.17630             | -1.50600 |
| H | 0.25790         | -2.14050             | -1.04310 |
| H | 0.22240         | -1.12540             | -2.51390 |
| C | 0.47310         | 3.03820              | 1.14850  |
| H | 1.42620         | 3.47340              | 0.84610  |
| H | -0.25090        | 3.84600              | 1.27040  |
| H | 0.59970         | 2.56070              | 2.12450  |
| C | -0.00510        | 3.16210              | -1.67610 |
| C | 1.58030         | 4.79130              | -1.50480 |
| C | 1.46080         | 3.43240              | -1.79020 |
| H | 2.53770         | 5.29780              | -1.53890 |

|    |          |         |          |
|----|----------|---------|----------|
| Br | -0.74980 | 1.98020 | -3.08230 |
| O  | 2.30810  | 2.54410 | -2.03620 |
| C  | -0.79470 | 4.41720 | -1.42540 |
| H  | -1.43300 | 4.64000 | -2.28180 |
| H  | -1.46100 | 4.32350 | -0.56390 |
| C  | 0.29520  | 5.50650 | -1.24340 |
| H  | 0.26530  | 5.96270 | -0.24440 |
| H  | 0.11530  | 6.32610 | -1.95220 |

## INT2

34

BROMO\_H\_OXALLYL\_NOTOBS\_MINOR\_O\_BOUND

|    |          |          |          |
|----|----------|----------|----------|
| C  | -1.38960 | 1.45260  | -0.10620 |
| C  | -2.65760 | 1.63400  | 0.40860  |
| C  | -3.61560 | 0.62790  | 0.23250  |
| C  | -3.27910 | -0.53650 | -0.45340 |
| C  | -1.99840 | -0.72990 | -0.98050 |
| C  | -1.05940 | 0.28340  | -0.80910 |
| C  | -0.18330 | 2.35900  | -0.07120 |
| C  | 0.94420  | 1.41490  | -0.62740 |
| N  | 0.25170  | 0.33670  | -1.27630 |
| H  | -2.91070 | 2.54650  | 0.93730  |
| H  | -4.61470 | 0.75370  | 0.63170  |
| H  | -4.02260 | -1.31530 | -0.58150 |
| H  | -1.75300 | -1.64130 | -1.51110 |
| H  | 1.62760  | 1.05280  | 0.15250  |
| C  | 0.98830  | -0.83670 | -1.69330 |
| H  | 1.93150  | -0.51720 | -2.13730 |
| H  | 1.19500  | -1.52580 | -0.85970 |
| H  | 0.42760  | -1.37470 | -2.45980 |
| C  | 0.15290  | 2.86010  | 1.34010  |
| H  | 1.09250  | 3.41900  | 1.35230  |
| H  | -0.64000 | 3.50570  | 1.72280  |
| H  | 0.24870  | 2.00800  | 2.01560  |
| C  | -0.11980 | 3.52280  | -1.10990 |
| C  | 1.79040  | 4.60700  | -1.96480 |
| C  | 1.27030  | 3.42800  | -1.61630 |
| H  | 2.78460  | 4.77820  | -2.35190 |
| Br | -1.39510 | 3.13980  | -2.75310 |
| O  | 1.78060  | 2.17590  | -1.53590 |
| C  | -0.27630 | 5.01090  | -0.79900 |
| H  | -1.29790 | 5.37130  | -0.90630 |
| H  | 0.04990  | 5.19570  | 0.22760  |
| C  | 0.73850  | 5.68000  | -1.77040 |
| H  | 1.14740  | 6.60770  | -1.36080 |
| H  | 0.24680  | 5.92720  | -2.71930 |

**Product**

34

BROMO\_H\_OXALLYL\_NOTOBS\_MINOR\_PROD

|    |          |          |          |
|----|----------|----------|----------|
| C  | -1.55080 | 1.54150  | -0.37810 |
| C  | -2.86880 | 1.45080  | 0.03660  |
| C  | -3.54740 | 0.23350  | -0.08580 |
| C  | -2.88810 | -0.87890 | -0.60300 |
| C  | -1.55440 | -0.80700 | -1.00960 |
| C  | -0.89460 | 0.41740  | -0.90000 |
| C  | -0.57540 | 2.70280  | -0.25590 |
| C  | 0.77260  | 2.05670  | -0.81210 |
| N  | 0.41250  | 0.71600  | -1.26460 |
| H  | -3.37090 | 2.31590  | 0.44980  |
| H  | -4.58140 | 0.15700  | 0.22750  |
| H  | -3.41470 | -1.82300 | -0.68940 |
| H  | -1.05130 | -1.68270 | -1.40010 |
| H  | 1.55030  | 2.02160  | -0.03740 |
| C  | 1.44120  | -0.29600 | -1.35790 |
| H  | 2.34210  | 0.14270  | -1.79130 |
| H  | 1.69880  | -0.73130 | -0.37900 |
| H  | 1.12050  | -1.10140 | -2.02120 |
| C  | -0.47530 | 3.17310  | 1.19810  |
| H  | 0.37360  | 3.84050  | 1.36150  |
| H  | -1.38870 | 3.69590  | 1.49150  |
| H  | -0.35360 | 2.30710  | 1.85170  |
| C  | -0.79280 | 3.87190  | -1.27800 |
| C  | 1.19020  | 2.96190  | -1.99120 |
| C  | -0.19660 | 3.26980  | -2.57100 |
| H  | 1.88920  | 2.50400  | -2.68710 |
| Br | -2.64880 | 4.57030  | -1.41570 |
| O  | -0.65500 | 3.12720  | -3.66270 |
| C  | 0.22350  | 5.01120  | -1.06130 |
| H  | -0.00860 | 5.82260  | -1.75240 |
| H  | 0.18660  | 5.41810  | -0.05300 |
| C  | 1.59320  | 4.34450  | -1.42680 |
| H  | 2.24430  | 4.23750  | -0.55550 |
| H  | 2.12850  | 4.93510  | -2.17120 |

**Reaction 8a + 11 (R<sup>2</sup> = CH<sub>3</sub>): observed regioisomer; major stereoisomer****15b**

37

REACTION2\_B\_MAJOR\_DEF2\_TZVP\_SP\_TRIFLUOROETHANOL

|   |          |         |          |
|---|----------|---------|----------|
| C | -1.53960 | 1.96940 | -0.08320 |
| C | -2.74840 | 2.07050 | 0.58180  |

|    |          |          |          |
|----|----------|----------|----------|
| C  | -3.68640 | 1.03630  | 0.46710  |
| C  | -3.38490 | -0.08690 | -0.29880 |
| C  | -2.16550 | -0.20450 | -0.97180 |
| C  | -1.24970 | 0.84290  | -0.87020 |
| C  | -0.35390 | 2.90740  | -0.08100 |
| C  | 0.69130  | 2.13450  | -0.99400 |
| N  | -0.00930 | 0.95760  | -1.48830 |
| H  | -2.96300 | 2.93640  | 1.19860  |
| H  | -4.63630 | 1.10450  | 0.98310  |
| H  | -4.10640 | -0.89290 | -0.37450 |
| H  | -1.94490 | -1.08820 | -1.55760 |
| H  | 1.58460  | 1.85630  | -0.42480 |
| C  | 0.74400  | -0.19810 | -1.93430 |
| H  | 1.63100  | 0.14050  | -2.46860 |
| H  | 1.05570  | -0.84220 | -1.09780 |
| H  | 0.14580  | -0.79470 | -2.62660 |
| C  | 0.19580  | 3.12120  | 1.33580  |
| H  | 1.07610  | 3.77060  | 1.33240  |
| H  | -0.55910 | 3.57260  | 1.98270  |
| H  | 0.47640  | 2.15980  | 1.77150  |
| C  | -0.54950 | 4.27220  | -0.85050 |
| C  | 1.07670  | 3.17610  | -2.07580 |
| C  | -1.19190 | 3.99040  | -2.23860 |
| H  | -2.06600 | 3.34650  | -2.14380 |
| C  | 0.91050  | 4.48590  | -1.27800 |
| O  | 1.67180  | 5.37950  | -1.05280 |
| H  | -1.51330 | 4.93110  | -2.68970 |
| C  | -0.05740 | 3.32940  | -3.09460 |
| H  | -0.34500 | 2.36490  | -3.50770 |
| H  | 0.26240  | 3.98310  | -3.90680 |
| C  | -1.18750 | 5.40740  | -0.07510 |
| H  | -2.20670 | 5.14840  | 0.22430  |
| H  | -0.61350 | 5.65880  | 0.81760  |
| H  | -1.23500 | 6.30520  | -0.69570 |
| Br | 2.87300  | 2.87510  | -2.88730 |

## TS1

37

REACTION2\_B MAJOR\_TS\_DEF2\_TZVP\_SP\_TRIFLUOROETHANOL (DIRECT)

|   |          |          |          |
|---|----------|----------|----------|
| C | -1.50030 | 1.84480  | 0.34320  |
| C | -2.79110 | 1.98060  | 0.84490  |
| C | -3.76300 | 1.06050  | 0.44850  |
| C | -3.46150 | 0.01990  | -0.43700 |
| C | -2.17150 | -0.13770 | -0.94760 |
| C | -1.22040 | 0.77960  | -0.53320 |
| C | -0.27850 | 2.65250  | 0.47500  |

|    |          |          |          |
|----|----------|----------|----------|
| C  | 0.69870  | 1.89640  | -0.25460 |
| N  | 0.15170  | 0.87220  | -0.88470 |
| H  | -3.03680 | 2.78600  | 1.52650  |
| H  | -4.77210 | 1.15180  | 0.83300  |
| H  | -4.23770 | -0.67720 | -0.72840 |
| H  | -1.93210 | -0.94250 | -1.63160 |
| H  | 1.74250  | 2.15500  | -0.36830 |
| C  | 0.82070  | 0.03690  | -1.87870 |
| H  | 1.74290  | 0.52900  | -2.18530 |
| H  | 1.02620  | -0.95200 | -1.46480 |
| H  | 0.17490  | -0.06160 | -2.75200 |
| C  | 0.12620  | 3.30140  | 1.78280  |
| H  | 1.00680  | 3.92310  | 1.61940  |
| H  | -0.68080 | 3.91680  | 2.18110  |
| H  | 0.35170  | 2.53110  | 2.52660  |
| C  | -0.39690 | 4.12750  | -0.92320 |
| C  | 1.10550  | 3.70880  | -2.61630 |
| C  | -1.20700 | 3.68140  | -2.12840 |
| H  | -1.93440 | 2.89910  | -1.90940 |
| C  | 1.06770  | 4.23400  | -1.33810 |
| O  | 1.94740  | 4.59090  | -0.51920 |
| H  | -1.78870 | 4.54460  | -2.46590 |
| C  | -0.18350 | 3.26670  | -3.21680 |
| H  | -0.21290 | 2.18600  | -3.41960 |
| H  | -0.41150 | 3.75420  | -4.17290 |
| C  | -0.94900 | 5.26160  | -0.10880 |
| H  | -1.90280 | 5.02600  | 0.37150  |
| H  | -0.22030 | 5.60930  | 0.62070  |
| H  | -1.12350 | 6.08810  | -0.80780 |
| Br | 2.78420  | 3.25120  | -3.49640 |

## TS2

37

REACTION2\_B\_MAJOR\_O\_BOUND\_TS\_RESTART\_DEF2\_TZVP\_SP\_TRIFLUOROETHAN  
OL

|   |          |         |          |
|---|----------|---------|----------|
| C | -0.82040 | 3.53160 | 0.17870  |
| C | -2.09370 | 2.97900 | 0.09840  |
| C | -2.26980 | 1.80470 | -0.63600 |
| C | -1.19120 | 1.20460 | -1.29490 |
| C | 0.09940  | 1.72420 | -1.19620 |
| C | 0.25780  | 2.87250 | -0.43340 |
| C | -0.29330 | 4.77400 | 0.78380  |
| C | 1.13560  | 4.59940 | 0.70320  |
| N | 1.43410  | 3.56380 | -0.08370 |
| H | -2.93500 | 3.45070 | 0.59300  |
| H | -3.25450 | 1.35860 | -0.70840 |



|    |          |         |          |
|----|----------|---------|----------|
| H  | -1.35580 | 0.30790 | -1.88070 |
| H  | 0.93520  | 1.25170 | -1.69520 |
| H  | 1.90750  | 5.24050 | 1.09100  |
| C  | 2.75720  | 3.29360 | -0.63440 |
| H  | 3.30290  | 4.23440 | -0.65920 |
| H  | 3.27510  | 2.53520 | -0.04320 |
| H  | 2.64330  | 2.95520 | -1.66360 |
| C  | -0.95420 | 5.32500 | 2.02800  |
| H  | -0.41030 | 6.17790 | 2.43400  |
| H  | -1.97770 | 5.64400 | 1.81640  |
| H  | -1.00150 | 4.55150 | 2.79940  |
| C  | -0.46660 | 6.16980 | -0.67130 |
| C  | 0.24000  | 5.13290 | -2.58780 |
| C  | -1.71410 | 5.86340 | -1.47650 |
| H  | -2.51350 | 5.40340 | -0.89110 |
| C  | 0.72970  | 5.88610 | -1.53440 |
| O  | 1.89310  | 6.20300 | -1.17320 |
| H  | -2.10970 | 6.80950 | -1.86110 |
| C  | -1.23960 | 4.97120 | -2.64970 |
| H  | -1.53300 | 3.92280 | -2.52690 |
| H  | -1.66120 | 5.31060 | -3.60260 |
| C  | -0.40690 | 7.47710 | 0.07370  |
| H  | -1.25040 | 7.63330 | 0.74790  |
| H  | 0.53650  | 7.57120 | 0.61260  |
| H  | -0.42590 | 8.27810 | -0.67380 |
| Br | 1.35790  | 4.32970 | -3.94600 |

### TS3

37

| REACTION2_B | MAJOR_INT | TS       | REDONE_0_3_SP | TFE_DEF2_TZVP |
|-------------|-----------|----------|---------------|---------------|
| C           | -1.51670  | 0.80640  | -0.16060      |               |
| C           | -2.79550  | 0.62550  | 0.36100       |               |
| C           | -3.62880  | -0.31220 | -0.24330      |               |
| C           | -3.21390  | -1.04820 | -1.36310      |               |
| C           | -1.94110  | -0.88460 | -1.89980      |               |
| C           | -1.11270  | 0.03650  | -1.26480      |               |
| C           | -0.40440  | 1.72480  | 0.18530       |               |
| C           | 0.64560   | 1.30280  | -0.68790      |               |
| N           | 0.21700   | 0.37970  | -1.56150      |               |
| H           | -3.14350  | 1.24450  | 1.17450       |               |
| H           | -4.62910  | -0.46000 | 0.14560       |               |
| H           | -3.89610  | -1.75550 | -1.82000      |               |
| H           | -1.61710  | -1.44740 | -2.76650      |               |
| H           | 1.66220   | 1.66270  | -0.72800      |               |
| C           | 0.96550   | -0.15800 | -2.68530      |               |
| H           | 1.99090   | 0.20590  | -2.64320      |               |

|    |          |          |          |
|----|----------|----------|----------|
| H  | 0.96930  | -1.24890 | -2.63840 |
| H  | 0.50950  | 0.15510  | -3.62800 |
| C  | -0.08350 | 2.02080  | 1.63720  |
| H  | 0.79210  | 2.66690  | 1.72350  |
| H  | -0.92140 | 2.52440  | 2.11940  |
| H  | 0.12400  | 1.08860  | 2.16940  |
| C  | -0.87810 | 3.48600  | -0.61290 |
| C  | -1.31020 | 4.95520  | 1.10490  |
| C  | 0.33060  | 4.41030  | -0.49770 |
| H  | 1.28810  | 3.88510  | -0.46740 |
| C  | -1.93940 | 3.95720  | 0.35340  |
| O  | -3.09250 | 3.49220  | 0.38620  |
| H  | 0.36080  | 5.05240  | -1.38330 |
| C  | 0.09960  | 5.27510  | 0.76550  |
| H  | 0.79610  | 5.03180  | 1.58030  |
| H  | 0.24500  | 6.33980  | 0.54770  |
| C  | -1.40060 | 3.18750  | -1.99590 |
| H  | -0.68210 | 2.65840  | -2.62710 |
| H  | -2.33270 | 2.62780  | -1.93230 |
| H  | -1.62370 | 4.14430  | -2.47980 |
| Br | -2.26340 | 6.00690  | 2.40810  |

## INT2

37

REACTION2\_B\_MAJOR\_O\_BOUND\_DEF2\_TZVP\_SP\_TRIFLUOROETHANOL

|   |          |          |          |
|---|----------|----------|----------|
| C | -1.54590 | 1.98320  | -0.10250 |
| C | -2.74520 | 2.06840  | 0.58450  |
| C | -3.67810 | 1.02930  | 0.47620  |
| C | -3.39040 | -0.08370 | -0.30950 |
| C | -2.16880 | -0.20180 | -0.97820 |
| C | -1.24600 | 0.83230  | -0.84580 |
| C | -0.34730 | 2.92160  | -0.12050 |
| C | 0.55450  | 2.22160  | -1.20510 |
| N | 0.06670  | 0.88600  | -1.31920 |
| H | -2.96570 | 2.93080  | 1.20350  |
| H | -4.62460 | 1.09560  | 0.99890  |
| H | -4.12170 | -0.87880 | -0.40200 |
| H | -1.94960 | -1.07800 | -1.57530 |
| H | 1.62800  | 2.24240  | -1.01250 |
| C | 0.54750  | 0.03070  | -2.38820 |
| H | 1.62290  | 0.17750  | -2.50290 |
| H | 0.37420  | -1.01650 | -2.13130 |
| H | 0.06240  | 0.25350  | -3.34580 |
| C | 0.31730  | 2.93140  | 1.26390  |
| H | 1.27750  | 3.45000  | 1.25890  |
| H | -0.33480 | 3.42060  | 1.99170  |

|    |          |         |          |
|----|----------|---------|----------|
| H  | 0.48440  | 1.90610 | 1.60160  |
| C  | -0.59240 | 4.32750 | -0.77630 |
| C  | -1.32730 | 4.66850 | -2.99770 |
| C  | -1.96700 | 5.03970 | -0.72750 |
| H  | -2.76160 | 4.31780 | -0.55070 |
| C  | -0.50470 | 3.95770 | -2.23460 |
| O  | 0.36580  | 2.96100 | -2.47240 |
| H  | -2.01710 | 5.80940 | 0.04650  |
| C  | -2.15370 | 5.61920 | -2.16510 |
| H  | -3.20290 | 5.62210 | -2.47010 |
| H  | -1.79030 | 6.65090 | -2.24850 |
| C  | 0.53620  | 5.32200 | -0.42900 |
| H  | 0.50480  | 5.59960 | 0.62740  |
| H  | 1.52360  | 4.90840 | -0.64890 |
| H  | 0.41960  | 6.23160 | -1.02220 |
| Br | -1.48410 | 4.55410 | -4.91960 |

### INT3

37

REACTION2\_B MAJOR\_INT\_DEF2\_TZVP\_SP\_TRIFLUOROETHANOL

|   |          |          |          |
|---|----------|----------|----------|
| C | -1.53650 | 0.81680  | -0.26980 |
| C | -2.79970 | 0.63550  | 0.27930  |
| C | -3.59640 | -0.39730 | -0.21870 |
| C | -3.15520 | -1.23060 | -1.25290 |
| C | -1.88700 | -1.07410 | -1.80660 |
| C | -1.10590 | -0.05210 | -1.27890 |
| C | -0.43460 | 1.82110  | 0.00470  |
| C | 0.63690  | 1.30220  | -0.86210 |
| N | 0.22270  | 0.29760  | -1.61730 |
| H | -3.17020 | 1.31920  | 1.02860  |
| H | -4.58690 | -0.54490 | 0.19430  |
| H | -3.80620 | -2.01180 | -1.62720 |
| H | -1.53400 | -1.71830 | -2.60220 |
| H | 1.63670  | 1.69490  | -0.96770 |
| C | 0.98470  | -0.36690 | -2.66500 |
| H | 1.97670  | 0.07640  | -2.72760 |
| H | 1.07260  | -1.43080 | -2.43610 |
| H | 0.47160  | -0.24890 | -3.62170 |
| C | -0.01740 | 1.89900  | 1.48210  |
| H | 0.89460  | 2.48550  | 1.60360  |
| H | -0.80920 | 2.39020  | 2.05070  |
| H | 0.15550  | 0.89830  | 1.88450  |
| C | -0.81380 | 3.33730  | -0.57830 |
| C | -1.34800 | 4.84360  | 1.14110  |
| C | 0.36780  | 4.31990  | -0.39870 |
| H | 1.34750  | 3.83400  | -0.36090 |

|    |          |         |          |
|----|----------|---------|----------|
| C  | -1.94610 | 3.88650 | 0.33490  |
| O  | -3.11190 | 3.45390 | 0.26010  |
| H  | 0.39030  | 4.99140 | -1.25970 |
| C  | 0.08640  | 5.14410 | 0.88460  |
| H  | 0.73810  | 4.85220 | 1.72120  |
| H  | 0.26840  | 6.21210 | 0.71610  |
| C  | -1.31860 | 3.23330 | -2.01690 |
| H  | -0.58280 | 2.79170 | -2.69750 |
| H  | -2.24360 | 2.65750 | -2.04860 |
| H  | -1.54850 | 4.23750 | -2.38030 |
| Br | -2.35850 | 5.91490 | 2.39970  |

**Reaction 8a + 11 (R<sup>2</sup> = CH<sub>3</sub>): observed regioisomer; minor stereoisomer**

**15b(minor stereoisomer)**

37

| REACTION2 | B        | MINOR    | SP | TFE | DEF2 | TZVP     |
|-----------|----------|----------|----|-----|------|----------|
| C         | -1.49490 | 1.55240  |    |     |      | -0.12170 |
| C         | -2.73990 | 1.65820  |    |     |      | 0.47680  |
| C         | -3.70640 | 0.67420  |    |     |      | 0.23970  |
| C         | -3.40110 | -0.41170 |    |     |      | -0.57770 |
| C         | -2.14430 | -0.54170 |    |     |      | -1.17140 |
| C         | -1.19640 | 0.45670  |    |     |      | -0.94200 |
| C         | -0.26490 | 2.42920  |    |     |      | 0.04230  |
| C         | 0.80960  | 1.65090  |    |     |      | -0.85030 |
| N         | 0.10200  | 0.51670  |    |     |      | -1.43260 |
| H         | -2.96330 | 2.49010  |    |     |      | 1.13480  |
| H         | -4.68470 | 0.75340  |    |     |      | 0.69790  |
| H         | -4.14910 | -1.17650 |    |     |      | -0.75520 |
| H         | -1.91650 | -1.39540 |    |     |      | -1.79690 |
| H         | 1.67550  | 1.32180  |    |     |      | -0.26430 |
| C         | 0.81750  | -0.70440 |    |     |      | -1.75980 |
| H         | 1.83210  | -0.45830 |    |     |      | -2.06400 |
| H         | 0.85030  | -1.40170 |    |     |      | -0.90870 |
| H         | 0.34040  | -1.20670 |    |     |      | -2.60420 |
| C         | 0.13950  | 2.51170  |    |     |      | 1.51850  |
| H         | 1.12470  | 2.96220  |    |     |      | 1.65520  |
| H         | -0.58820 | 3.09640  |    |     |      | 2.08770  |
| H         | 0.16740  | 1.50710  |    |     |      | 1.94590  |
| C         | -0.39220 | 3.83400  |    |     |      | -0.67130 |
| C         | 1.23890  | 2.72420  |    |     |      | -1.87770 |
| C         | -0.11050 | 3.42360  |    |     |      | -2.12700 |
| Br        | 2.17180  | 2.04420  |    |     |      | -3.49910 |
| O         | -0.73260 | 3.61930  |    |     |      | -3.12650 |
| C         | 0.90490  | 4.64850  |    |     |      | -0.42590 |

|   |          |         |          |
|---|----------|---------|----------|
| H | 0.79900  | 5.62890 | -0.89710 |
| H | 1.10250  | 4.81830 | 0.63200  |
| C | 2.02580  | 3.82480 | -1.13940 |
| H | 2.74110  | 3.38290 | -0.44200 |
| H | 2.58340  | 4.43760 | -1.84590 |
| C | -1.67510 | 4.60980 | -0.45330 |
| H | -1.82070 | 4.84540 | 0.60490  |
| H | -1.63950 | 5.55050 | -1.00760 |
| H | -2.53880 | 4.04830 | -0.80850 |

## TS1

37

REACTION2\_B\_MINOR\_TS\_SP\_TFE\_DEF2\_TZVP

|    |          |          |          |
|----|----------|----------|----------|
| C  | -1.52340 | 1.54170  | 0.24050  |
| C  | -2.81910 | 1.70260  | 0.71930  |
| C  | -3.81900 | 0.86420  | 0.22520  |
| C  | -3.53490 | -0.11640 | -0.73120 |
| C  | -2.23700 | -0.30420 | -1.20560 |
| C  | -1.25860 | 0.52600  | -0.68830 |
| C  | -0.25880 | 2.25750  | 0.49300  |
| C  | 0.71000  | 1.46370  | -0.20690 |
| N  | 0.13280  | 0.53190  | -0.94250 |
| H  | -3.05200 | 2.47070  | 1.44700  |
| H  | -4.83590 | 0.97790  | 0.58230  |
| H  | -4.33470 | -0.74100 | -1.11030 |
| H  | -2.01350 | -1.05090 | -1.95600 |
| H  | 1.77350  | 1.63600  | -0.26990 |
| C  | 0.74490  | -0.16640 | -2.07170 |
| H  | 1.81800  | 0.00940  | -2.06250 |
| H  | 0.53280  | -1.23390 | -2.00130 |
| H  | 0.32460  | 0.26830  | -2.98040 |
| C  | 0.02180  | 2.86880  | 1.84530  |
| H  | 1.06960  | 3.15060  | 1.95270  |
| H  | -0.58680 | 3.76100  | 2.01050  |
| H  | -0.21750 | 2.15430  | 2.63840  |
| C  | -0.20120 | 3.78310  | -0.89280 |
| C  | 1.40240  | 3.35240  | -2.49220 |
| C  | 0.06390  | 3.11070  | -2.23750 |
| Br | 2.34990  | 2.55640  | -3.99710 |
| O  | -0.82640 | 2.44730  | -2.82110 |
| C  | 1.00610  | 4.63870  | -0.56370 |
| H  | 0.75140  | 5.65950  | -0.86830 |
| H  | 1.25810  | 4.69220  | 0.49650  |
| C  | 2.15440  | 4.11210  | -1.45520 |
| H  | 2.86130  | 3.48520  | -0.88090 |
| H  | 2.75260  | 4.93610  | -1.85960 |

|   |          |         |          |
|---|----------|---------|----------|
| C | -1.57220 | 4.36920 | -0.72650 |
| H | -1.82570 | 4.61320 | 0.30840  |
| H | -1.59200 | 5.30190 | -1.30230 |
| H | -2.31450 | 3.69880 | -1.15660 |

## TS2

37

|    | REACTION2_B | MINOR_O_BOUND | TS_SP_TFE_DEF2 | TZVP |
|----|-------------|---------------|----------------|------|
| C  | -1.91150    | 1.97230       | -0.65790       |      |
| C  | -2.42280    | 2.12820       | 0.62760        |      |
| C  | -3.62860    | 1.50700       | 0.95090        |      |
| C  | -4.32490    | 0.74180       | 0.00610        |      |
| C  | -3.82770    | 0.56610       | -1.28410       |      |
| C  | -2.61800    | 1.17910       | -1.58370       |      |
| C  | -0.75470    | 2.55140       | -1.35850       |      |
| C  | -0.77120    | 1.90370       | -2.63750       |      |
| N  | -1.88290    | 1.16390       | -2.77940       |      |
| H  | -1.89530    | 2.72190       | 1.36480        |      |
| H  | -4.03600    | 1.61570       | 1.94910        |      |
| H  | -5.26240    | 0.27460       | 0.28280        |      |
| H  | -4.36410    | -0.02470      | -2.01670       |      |
| H  | -0.04980    | 1.99120       | -3.43070       |      |
| C  | -2.32220    | 0.52430       | -4.00840       |      |
| H  | -1.57490    | 0.69360       | -4.78080       |      |
| H  | -2.45390    | -0.54840      | -3.85010       |      |
| H  | -3.27030    | 0.95890       | -4.33490       |      |
| C  | 0.56170     | 2.81060       | -0.66260       |      |
| H  | 1.22940     | 3.38700       | -1.30540       |      |
| H  | 0.41520     | 3.36410       | 0.26620        |      |
| H  | 1.04990     | 1.86600       | -0.40760       |      |
| C  | -1.43310    | 4.41960       | -1.92610       |      |
| C  | 0.42830     | 5.62830       | -2.46990       |      |
| C  | -0.43590    | 4.68470       | -3.00500       |      |
| Br | 1.92310     | 6.35720       | -3.44630       |      |
| O  | -0.46810    | 4.06900       | -4.10040       |      |
| C  | -1.19910    | 5.36350       | -0.76440       |      |
| H  | -2.03780    | 6.06400       | -0.70260       |      |
| H  | -1.16340    | 4.85400       | 0.20190        |      |
| C  | 0.11340     | 6.11860       | -1.09760       |      |
| H  | 0.92580     | 5.91080       | -0.39030       |      |
| H  | -0.04980    | 7.20270       | -1.06980       |      |
| C  | -2.85230    | 4.22190       | -2.38050       |      |
| H  | -3.51460    | 3.88390       | -1.58230       |      |
| H  | -3.21450    | 5.19470       | -2.73240       |      |
| H  | -2.89760    | 3.54310       | -3.23120       |      |

**INT2**

37

| REACTION2 | _B       | MINOR | O | BOUND | SP       | TFE | DEF2 | TZVP     |
|-----------|----------|-------|---|-------|----------|-----|------|----------|
| C         | -1.97490 |       |   |       | 2.05030  |     |      | -0.41210 |
| C         | -2.53950 |       |   |       | 1.98850  |     |      | 0.84800  |
| C         | -3.68490 |       |   |       | 1.20690  |     |      | 1.04990  |
| C         | -4.23950 |       |   |       | 0.50170  |     |      | -0.01500 |
| C         | -3.68040 |       |   |       | 0.55810  |     |      | -1.29600 |
| C         | -2.54970 |       |   |       | 1.34830  |     |      | -1.48450 |
| C         | -0.76890 |       |   |       | 2.81390  |     |      | -0.90710 |
| C         | -0.59080 |       |   |       | 2.21420  |     |      | -2.34760 |
| N         | -1.85340 |       |   |       | 1.59510  |     |      | -2.66880 |
| H         | -2.09690 |       |   |       | 2.53520  |     |      | 1.67410  |
| H         | -4.13260 |       |   |       | 1.14420  |     |      | 2.03440  |
| H         | -5.12020 |       |   |       | -0.10940 |     |      | 0.14790  |
| H         | -4.12080 |       |   |       | 0.00100  |     |      | -2.11360 |
| H         | 0.24130  |       |   |       | 1.50240  |     |      | -2.42500 |
| C         | -1.93220 |       |   |       | 0.71540  |     |      | -3.81740 |
| H         | -1.38540 |       |   |       | 1.17160  |     |      | -4.64290 |
| H         | -1.51450 |       |   |       | -0.28240 |     |      | -3.61320 |
| H         | -2.97160 |       |   |       | 0.60070  |     |      | -4.13020 |
| C         | 0.48270  |       |   |       | 2.59120  |     |      | -0.05640 |
| H         | 1.35380  |       |   |       | 3.08300  |     |      | -0.49810 |
| H         | 0.34460  |       |   |       | 2.98100  |     |      | 0.95440  |
| H         | 0.69450  |       |   |       | 1.52270  |     |      | 0.02490  |
| C         | -1.03560 |       |   |       | 4.33560  |     |      | -1.25690 |
| C         | 0.34250  |       |   |       | 5.61150  |     |      | -2.69410 |
| C         | -0.25970 |       |   |       | 4.43690  |     |      | -2.54440 |
| Br        | 1.39620  |       |   |       | 6.17540  |     |      | -4.21160 |
| O         | -0.25380 |       |   |       | 3.29060  |     |      | -3.25960 |
| C         | -0.40480 |       |   |       | 5.48200  |     |      | -0.42590 |
| H         | -1.11620 |       |   |       | 5.92600  |     |      | 0.27390  |
| H         | 0.45420  |       |   |       | 5.12980  |     |      | 0.14480  |
| C         | 0.09650  |       |   |       | 6.50130  |     |      | -1.49760 |
| H         | 1.00670  |       |   |       | 7.01730  |     |      | -1.18230 |
| H         | -0.65300 |       |   |       | 7.27170  |     |      | -1.71400 |
| C         | -2.52810 |       |   |       | 4.63260  |     |      | -1.51310 |
| H         | -3.10600 |       |   |       | 4.51570  |     |      | -0.59400 |
| H         | -2.63970 |       |   |       | 5.66040  |     |      | -1.86670 |
| H         | -2.94580 |       |   |       | 3.96720  |     |      | -2.26880 |

**Reaction 8a + 11 (R<sup>2</sup> = CH<sub>3</sub>): unobserved regioisomer; major stereoisomer****TS2**

37

REACTION2\_B\_NOTOBS1\_O\_BOUND\_TS\_DEF2\_TZVP (SP\_TFE)

|    |          |          |          |
|----|----------|----------|----------|
| C  | -1.08550 | 3.36480  | 0.02670  |
| C  | -2.36830 | 2.84810  | -0.12080 |
| C  | -2.52980 | 1.62250  | -0.76760 |
| C  | -1.42160 | 0.93000  | -1.26850 |
| C  | -0.12420 | 1.41440  | -1.09890 |
| C  | 0.01890  | 2.62530  | -0.43120 |
| C  | -0.57240 | 4.62230  | 0.60320  |
| C  | 0.85050  | 4.41390  | 0.64980  |
| N  | 1.18220  | 3.30090  | -0.01580 |
| H  | -3.22750 | 3.38750  | 0.26060  |
| H  | -3.52160 | 1.20450  | -0.89080 |
| H  | -1.56870 | -0.01330 | -1.78140 |
| H  | 0.72780  | 0.85690  | -1.46600 |
| H  | 1.60500  | 5.07460  | 1.04050  |
| C  | 2.54900  | 2.99730  | -0.42670 |
| H  | 3.17970  | 2.86570  | 0.45430  |
| H  | 2.56030  | 2.08190  | -1.01330 |
| H  | 2.89910  | 3.84410  | -1.02240 |
| C  | -1.33470 | 5.28130  | 1.72850  |
| H  | -0.77290 | 6.10190  | 2.16950  |
| H  | -2.28540 | 5.68350  | 1.37130  |
| H  | -1.54730 | 4.54320  | 2.50720  |
| C  | -0.56270 | 5.91030  | -0.99290 |
| C  | 0.20450  | 4.75960  | -2.82420 |
| C  | -1.79260 | 5.65970  | -1.82860 |
| H  | -2.63390 | 5.26720  | -1.25390 |
| C  | 0.65510  | 5.53170  | -1.75710 |
| O  | 1.82930  | 5.76910  | -1.36100 |
| H  | -2.11870 | 6.60070  | -2.27640 |
| C  | -1.28600 | 4.68680  | -2.91990 |
| H  | -1.64060 | 3.66160  | -2.75340 |
| H  | -1.65700 | 4.98650  | -3.90920 |
| Br | -0.46760 | 7.71330  | -0.15730 |
| C  | 1.10630  | 4.07960  | -3.78910 |
| H  | 0.92810  | 2.99400  | -3.78950 |
| H  | 0.93950  | 4.42160  | -4.81860 |
| H  | 2.14840  | 4.27150  | -3.52640 |

## INT2

37

REACTION2\_B\_NOTOBS1\_O\_BOUND\_DEF2\_TZVP\_SP\_TRIFLUOROETHANOL

|   |          |         |          |
|---|----------|---------|----------|
| C | -0.99190 | 3.31710 | -0.00590 |
| C | -2.25480 | 2.78600 | -0.19970 |
| C | -2.40900 | 1.39720 | -0.29630 |
| C | -1.29850 | 0.56470 | -0.18360 |
| C | -0.02250 | 1.08600 | 0.04810  |



|    |          |          |          |
|----|----------|----------|----------|
| C  | 0.11330  | 2.46750  | 0.15460  |
| C  | -0.53840 | 4.76200  | 0.21450  |
| C  | 1.02120  | 4.57510  | 0.15610  |
| N  | 1.25400  | 3.20420  | 0.48060  |
| H  | -3.12150 | 3.43290  | -0.27160 |
| H  | -3.39200 | 0.97320  | -0.46160 |
| H  | -1.42210 | -0.50900 | -0.27050 |
| H  | 0.83220  | 0.42860  | 0.14700  |
| H  | 1.59350  | 5.25290  | 0.78840  |
| C  | 2.59080  | 2.65220  | 0.36640  |
| H  | 3.30760  | 3.37980  | 0.75010  |
| H  | 2.67080  | 1.74630  | 0.97110  |
| H  | 2.85460  | 2.41630  | -0.67190 |
| C  | -1.04440 | 5.24410  | 1.57770  |
| H  | -0.61640 | 6.20780  | 1.84770  |
| H  | -2.13190 | 5.34300  | 1.55680  |
| H  | -0.78440 | 4.50710  | 2.34060  |
| C  | -0.77270 | 5.65110  | -1.02310 |
| C  | 0.06030  | 5.40390  | -3.21190 |
| C  | -1.98280 | 5.67470  | -1.94810 |
| H  | -2.42540 | 4.67710  | -1.95590 |
| C  | 0.34160  | 5.29120  | -1.90830 |
| O  | 1.43280  | 4.85880  | -1.23390 |
| H  | -2.74440 | 6.39540  | -1.65550 |
| C  | -1.35120 | 5.94320  | -3.34200 |
| H  | -1.91160 | 5.45420  | -4.14520 |
| H  | -1.33680 | 7.01860  | -3.56110 |
| Br | -0.41510 | 7.71320  | -0.45110 |
| C  | 0.95600  | 5.11450  | -4.36710 |
| H  | 0.48470  | 4.41350  | -5.06530 |
| H  | 1.17670  | 6.02760  | -4.93340 |
| H  | 1.90260  | 4.68670  | -4.03170 |

### TS3

37

| REACTION2 | B        | NOTOBS | INT | TS       | SP | TFE | DEF2 | TZVP     |
|-----------|----------|--------|-----|----------|----|-----|------|----------|
| C         | -1.46740 |        |     | 0.77400  |    |     |      | -0.14160 |
| C         | -2.73270 |        |     | 0.58910  |    |     |      | 0.40950  |
| C         | -3.57340 |        |     | -0.35590 |    |     |      | -0.16990 |
| C         | -3.17920 |        |     | -1.09240 |    |     |      | -1.29690 |
| C         | -1.92340 |        |     | -0.91830 |    |     |      | -1.86760 |
| C         | -1.08660 |        |     | 0.01060  |    |     |      | -1.25720 |
| C         | -0.34960 |        |     | 1.68670  |    |     |      | 0.17900  |
| C         | 0.67950  |        |     | 1.28490  |    |     |      | -0.72350 |
| N         | 0.23070  |        |     | 0.36720  |    |     |      | -1.59040 |
| H         | -3.06720 |        |     | 1.21130  |    |     |      | 1.22610  |

|    |          |          |          |
|----|----------|----------|----------|
| H  | -4.56420 | -0.50770 | 0.24120  |
| H  | -3.86740 | -1.80530 | -1.73580 |
| H  | -1.62100 | -1.47380 | -2.74650 |
| H  | 1.68510  | 1.66800  | -0.80120 |
| C  | 0.91240  | -0.07740 | -2.79350 |
| H  | 1.95020  | 0.25100  | -2.76230 |
| H  | 0.88230  | -1.16650 | -2.85540 |
| H  | 0.42370  | 0.35190  | -3.67140 |
| C  | -0.02550 | 2.04210  | 1.61130  |
| H  | 0.84780  | 2.69410  | 1.67390  |
| H  | -0.86790 | 2.55520  | 2.07640  |
| H  | 0.18660  | 1.13150  | 2.17820  |
| C  | -0.82760 | 3.49760  | -0.63190 |
| C  | -1.36300 | 4.99590  | 1.03050  |
| C  | 0.36370  | 4.42870  | -0.52880 |
| H  | 1.31560  | 3.90000  | -0.43830 |
| C  | -1.93060 | 3.95380  | 0.27180  |
| O  | -3.07310 | 3.46510  | 0.33560  |
| H  | 0.43080  | 5.03960  | -1.43020 |
| C  | 0.05210  | 5.31650  | 0.69810  |
| H  | 0.73380  | 5.11720  | 1.53910  |
| H  | 0.18960  | 6.37920  | 0.45200  |
| Br | -1.39460 | 3.11870  | -2.51340 |
| C  | -2.16570 | 5.77920  | 2.00530  |
| H  | -1.67960 | 5.80900  | 2.99040  |
| H  | -2.28730 | 6.82480  | 1.68920  |
| H  | -3.15520 | 5.32930  | 2.10700  |

### INT3

37

| REACTION2 | _B       | NOTOBS | _INT     | REDO | _SP      | TFE | _DEF2 | _TZVP |
|-----------|----------|--------|----------|------|----------|-----|-------|-------|
| C         | -1.50850 |        | 0.73610  |      | -0.24840 |     |       |       |
| C         | -2.76410 |        | 0.54360  |      | 0.30820  |     |       |       |
| C         | -3.55780 |        | -0.48860 |      | -0.19700 |     |       |       |
| C         | -3.11870 |        | -1.30870 |      | -1.24110 |     |       |       |
| C         | -1.85340 |        | -1.14040 |      | -1.79850 |     |       |       |
| C         | -1.07820 |        | -0.12030 |      | -1.26440 |     |       |       |
| C         | -0.40440 |        | 1.74340  |      | 0.03320  |     |       |       |
| C         | 0.65600  |        | 1.25570  |      | -0.88640 |     |       |       |
| N         | 0.24180  |        | 0.25340  |      | -1.62520 |     |       |       |
| H         | -3.13330 |        | 1.22960  |      | 1.05650  |     |       |       |
| H         | -4.54740 |        | -0.64180 |      | 0.21640  |     |       |       |
| H         | -3.76880 |        | -2.08670 |      | -1.62310 |     |       |       |
| H         | -1.50470 |        | -1.76850 |      | -2.60830 |     |       |       |
| H         | 1.63270  |        | 1.68890  |      | -1.03690 |     |       |       |
| C         | 0.93830  |        | -0.29760 |      | -2.77960 |     |       |       |

|    |          |          |          |
|----|----------|----------|----------|
| H  | 1.96020  | 0.07580  | -2.79820 |
| H  | 0.94550  | -1.38620 | -2.71870 |
| H  | 0.41460  | 0.01830  | -3.68460 |
| C  | 0.03180  | 1.74680  | 1.51350  |
| H  | 0.89580  | 2.39400  | 1.67150  |
| H  | -0.79350 | 2.12880  | 2.11500  |
| H  | 0.28240  | 0.73480  | 1.84010  |
| C  | -0.73810 | 3.24900  | -0.40150 |
| C  | -1.32670 | 4.87910  | 1.17070  |
| C  | 0.44160  | 4.22380  | -0.31160 |
| H  | 1.40250  | 3.72220  | -0.16340 |
| C  | -1.87610 | 3.82800  | 0.44450  |
| O  | -3.02740 | 3.33820  | 0.48200  |
| H  | 0.52370  | 4.78920  | -1.23770 |
| C  | 0.10170  | 5.17190  | 0.86470  |
| H  | 0.76050  | 4.97870  | 1.72730  |
| H  | 0.27330  | 6.22390  | 0.59240  |
| Br | -1.37390 | 3.13510  | -2.44740 |
| C  | -2.12430 | 5.67820  | 2.14220  |
| H  | -1.66310 | 5.68630  | 3.14030  |
| H  | -2.21330 | 6.72990  | 1.83370  |
| H  | -3.12890 | 5.25780  | 2.22210  |

## Product

37

REACTION2\_B\_NOTOBS1\_DEF2\_TZVP\_SP\_TRIFLUOROETHANOL

|   |          |          |          |
|---|----------|----------|----------|
| C | -1.43610 | 1.95020  | -0.00760 |
| C | -2.64960 | 2.06000  | 0.64790  |
| C | -3.57920 | 1.01860  | 0.54220  |
| C | -3.26620 | -0.11540 | -0.20430 |
| C | -2.04460 | -0.23450 | -0.87290 |
| C | -1.13610 | 0.82040  | -0.78290 |
| C | -0.25840 | 2.89350  | -0.00810 |
| C | 0.78530  | 2.14660  | -0.94500 |
| N | 0.10400  | 0.94020  | -1.41150 |
| H | -2.87150 | 2.94560  | 1.23220  |
| H | -4.53480 | 1.09030  | 1.04730  |
| H | -3.98290 | -0.92640 | -0.27190 |
| H | -1.82010 | -1.12340 | -1.44940 |
| H | 1.68570  | 1.88340  | -0.37610 |
| C | 0.88960  | -0.23040 | -1.74980 |
| H | 1.77530  | 0.07590  | -2.30660 |
| H | 1.21170  | -0.79310 | -0.85960 |
| H | 0.31450  | -0.90040 | -2.39210 |
| C | 0.31110  | 3.11010  | 1.39940  |
| H | 1.17930  | 3.77490  | 1.38010  |

|    |          |         |          |
|----|----------|---------|----------|
| H  | -0.43750 | 3.55300 | 2.05640  |
| H  | 0.61270  | 2.14810 | 1.81960  |
| C  | -0.46310 | 4.22910 | -0.79020 |
| C  | 1.16750  | 3.18060 | -2.05350 |
| C  | -1.15450 | 3.99500 | -2.14690 |
| H  | -2.04070 | 3.37270 | -2.03190 |
| C  | 0.98690  | 4.47990 | -1.24700 |
| O  | 1.74350  | 5.38400 | -1.04940 |
| H  | -1.45960 | 4.95080 | -2.57190 |
| C  | -0.03800 | 3.32020 | -3.01370 |
| H  | -0.34180 | 2.34550 | -3.39340 |
| H  | 0.23600  | 3.95540 | -3.85910 |
| Br | -1.32010 | 5.69410 | 0.25780  |
| C  | 2.52210  | 2.99810 | -2.70700 |
| H  | 2.53460  | 2.11300 | -3.34890 |
| H  | 2.76890  | 3.86640 | -3.32240 |
| H  | 3.30870  | 2.89180 | -1.95530 |

**Reaction 8a + 11 (R<sup>2</sup> = CH<sub>3</sub>): observed regioisomer; minor stereoisomer**

**TS2**

37

| REACTION2 | NOTOBS2  | O_BOUND | TS_DEF2  | TZVP | SP | TRIFLUOROETHANOL |
|-----------|----------|---------|----------|------|----|------------------|
| C         | -1.57010 |         | 2.27560  |      |    | 0.14060          |
| C         | -2.16420 |         | 2.72550  |      |    | 1.31670          |
| C         | -3.44490 |         | 2.27700  |      |    | 1.63310          |
| C         | -4.13020 |         | 1.39290  |      |    | 0.78900          |
| C         | -3.55020 |         | 0.92390  |      |    | -0.38750         |
| C         | -2.26920 |         | 1.37200  |      |    | -0.68110         |
| C         | -0.30190 |         | 2.58710  |      |    | -0.52880         |
| C         | -0.26490 |         | 1.69090  |      |    | -1.64540         |
| N         | -1.43480 |         | 1.04860  |      |    | -1.76480         |
| H         | -1.64170 |         | 3.40800  |      |    | 1.97660          |
| H         | -3.92070 |         | 2.61520  |      |    | 2.54610          |
| H         | -5.12800 |         | 1.06590  |      |    | 1.05630          |
| H         | -4.08210 |         | 0.24630  |      |    | -1.04360         |
| H         | 0.51480  |         | 1.60390  |      |    | -2.38380         |
| C         | -1.85840 |         | 0.28290  |      |    | -2.92490         |
| H         | -0.99970 |         | 0.12010  |      |    | -3.57320         |
| H         | -2.26830 |         | -0.67880 |      |    | -2.61050         |
| H         | -2.61590 |         | 0.84690  |      |    | -3.47430         |
| C         | 0.95140  |         | 2.92650  |      |    | 0.23790          |
| H         | 1.74890  |         | 3.23440  |      |    | -0.43860         |
| H         | 0.77250  |         | 3.73420  |      |    | 0.94970          |
| H         | 1.28930  |         | 2.05490  |      |    | 0.80560          |
| C         | -0.67770 |         | 4.33410  |      |    | -1.59460         |

|    |          |         |          |
|----|----------|---------|----------|
| C  | 1.30210  | 5.42330 | -1.96490 |
| C  | 0.52580  | 4.37360 | -2.45990 |
| C  | 2.61290  | 5.80010 | -2.55710 |
| H  | 2.90990  | 5.05120 | -3.29410 |
| H  | 2.57070  | 6.77750 | -3.05750 |
| H  | 3.39140  | 5.87980 | -1.78630 |
| Br | -2.39650 | 4.05200 | -2.57370 |
| O  | 0.75870  | 3.54430 | -3.37590 |
| C  | -0.70430 | 5.48980 | -0.62710 |
| H  | -1.52240 | 6.16900 | -0.87050 |
| H  | -0.87110 | 5.16540 | 0.40310  |
| C  | 0.67080  | 6.17330 | -0.83670 |
| H  | 1.29540  | 6.15130 | 0.06780  |
| H  | 0.52740  | 7.23720 | -1.07380 |

## INT2

37

REACTION2\_NOTOBS2\_O\_BOUND\_DEF2\_TZVP\_SP\_TRIFLUOROETHANOL

|   |          |          |          |
|---|----------|----------|----------|
| C | -1.77260 | 2.17570  | -0.12510 |
| C | -2.51340 | 2.37060  | 1.02310  |
| C | -3.75400 | 1.73360  | 1.15130  |
| C | -4.22140 | 0.91520  | 0.12610  |
| C | -3.48040 | 0.71230  | -1.04240 |
| C | -2.25480 | 1.36140  | -1.16190 |
| C | -0.43020 | 2.73570  | -0.52760 |
| C | -0.11100 | 1.90540  | -1.82550 |
| N | -1.36980 | 1.34810  | -2.23610 |
| H | -2.14260 | 3.01380  | 1.81380  |
| H | -4.34660 | 1.87440  | 2.04700  |
| H | -5.17970 | 0.41900  | 0.23270  |
| H | -3.85830 | 0.07340  | -1.83080 |
| H | 0.64860  | 1.12840  | -1.66440 |
| C | -1.40550 | 0.34550  | -3.27760 |
| H | -0.70050 | 0.62970  | -4.05920 |
| H | -1.15100 | -0.66000 | -2.90770 |
| H | -2.40000 | 0.31040  | -3.72640 |
| C | 0.65090  | 2.53700  | 0.54350  |
| H | 1.63380  | 2.85000  | 0.18100  |
| H | 0.41540  | 3.10680  | 1.44460  |
| H | 0.70310  | 1.48150  | 0.81680  |
| C | -0.38990 | 4.18810  | -1.10200 |
| C | 1.21980  | 5.12520  | -2.55480 |
| C | 0.48370  | 4.04320  | -2.28060 |
| C | 2.20270  | 5.30500  | -3.66090 |
| H | 2.35620  | 4.37050  | -4.20370 |
| H | 1.85700  | 6.06100  | -4.37630 |

|    |          |         |          |
|----|----------|---------|----------|
| H  | 3.16960  | 5.64990 | -3.27740 |
| Br | -2.30720 | 4.76840 | -1.81540 |
| O  | 0.46160  | 2.79420 | -2.81700 |
| C  | 0.17910  | 5.41820 | -0.39420 |
| H  | -0.56950 | 5.98760 | 0.15400  |
| H  | 0.95290  | 5.09930 | 0.30840  |
| C  | 0.85140  | 6.20460 | -1.55390 |
| H  | 1.72330  | 6.77380 | -1.21660 |
| H  | 0.14330  | 6.91840 | -1.99340 |

# Compound 9a

Submitted by: **Jimmy Wu**

Date Collected: **July 5, 2022**

Solved by: **Richard J Staples**

Sample ID: **ZTP-3-143-major**

Relative chirality determined for the crystal supplied.

## Crystal Data and Experimental

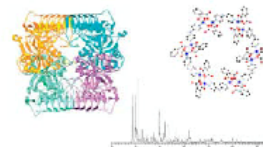

Center Crystallographic for Research  
Michigan State University  
Department of Chemistry  
East Lansing, MI 48824  
**Dr. Richard J. Staples**  
staples@chemistry.msu.edu

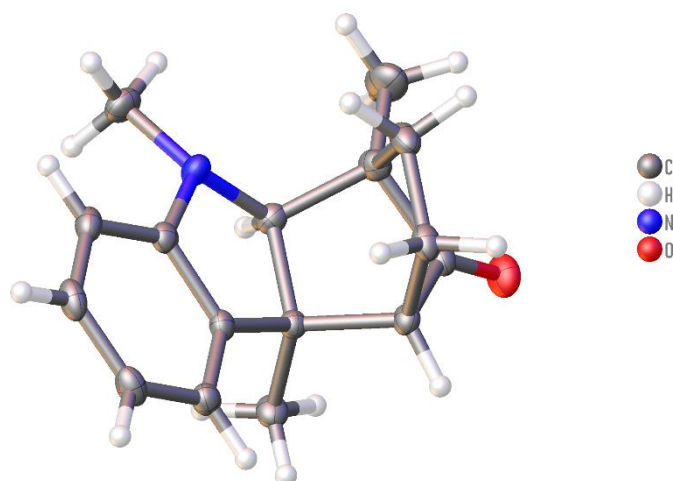

**Experimental.** Single colourless irregular-shaped crystals of **JW722A** used as received. A suitable crystal with dimensions  $0.21 \times 0.16 \times 0.14 \text{ mm}^3$  was selected and mounted on a nylon loop with paratone oil on a XtaLAB Synergy, Dualflex, HyPix diffractometer. The crystal was kept at a steady  $T = 100.00(10) \text{ K}$  during data collection. The structure was solved with the **ShelXT** (Sheldrick, 2015) solution program using dual methods and by using **Olex2** 1.5 (Dolomanov et al., 2009) as the graphical interface. The model was refined with **ShelXL** 2018/3 (Sheldrick, 2015) using full matrix least squares minimisation on  $F^2$ .

**Crystal Data.**  $\text{C}_{16}\text{H}_{19}\text{NO}$ ,  $M_r = 241.32$ , monoclinic,  $P2_1/n$  (No. 14),  $a = 11.82272(18) \text{ \AA}$ ,  $b = 8.08217(10) \text{ \AA}$ ,  $c = 14.6182(2) \text{ \AA}$ ,  $\beta = 111.1442(18)^\circ$ ,  $\alpha = \gamma = 90^\circ$ ,  $V = 1302.78(4) \text{ \AA}^3$ ,  $T = 100.00(10) \text{ K}$ ,  $Z = 4$ ,  $Z' = 1$ ,  $\mu(\text{Cu K}\alpha) = 0.592$ , 17052 reflections measured, 2813 unique ( $R_{\text{int}} = 0.0319$ ) which were used in all calculations. The final  $wR_2$  was 0.1052 (all data) and  $R_1$  was 0.0401 ( $I \geq 2 \sigma(I)$ ).

| Compound                              | JW722A                                |
|---------------------------------------|---------------------------------------|
| Formula                               | $\text{C}_{16}\text{H}_{19}\text{NO}$ |
| $D_{\text{calc.}} / \text{g cm}^{-3}$ | 1.230                                 |
| $\mu / \text{mm}^{-1}$                | 0.592                                 |
| Formula Weight                        | 241.32                                |
| Color                                 | colourless                            |
| Shape                                 | irregular-shaped                      |
| Size/ $\text{mm}^3$                   | $0.21 \times 0.16 \times 0.14$        |
| $T / \text{K}$                        | 100.00(10)                            |
| Crystal System                        | monoclinic                            |
| Space Group                           | $P2_1/n$                              |
| $a / \text{ \AA}$                     | 11.82272(18)                          |
| $b / \text{ \AA}$                     | 8.08217(10)                           |
| $c / \text{ \AA}$                     | 14.6182(2)                            |
| $\alpha / ^\circ$                     | 90                                    |
| $\beta / ^\circ$                      | 111.1442(18)                          |
| $\gamma / ^\circ$                     | 90                                    |
| $V / \text{ \AA}^3$                   | 1302.78(4)                            |
| $Z$                                   | 4                                     |
| $Z'$                                  | 1                                     |
| Wavelength/ $\text{ \AA}$             | 1.54184                               |
| Radiation type                        | Cu $K\alpha$                          |
| $\theta_{\text{min}} / ^\circ$        | 4.148                                 |
| $\theta_{\text{max}} / ^\circ$        | 80.158                                |
| Measured Refl's.                      | 17052                                 |
| Indep't Refl's                        | 2813                                  |
| Refl's $I \geq 2 \sigma(I)$           | 2620                                  |
| $R_{\text{int}}$                      | 0.0319                                |
| Parameters                            | 166                                   |
| Restraints                            | 0                                     |
| Largest Peak                          | 0.225                                 |
| Deepest Hole                          | -0.310                                |
| GooF                                  | 1.084                                 |
| $wR_2$ (all data)                     | 0.1052                                |
| $wR_2$                                | 0.1035                                |
| $R_1$ (all data)                      | 0.0419                                |
| $R_1$                                 | 0.0401                                |

**The Rigaku Synergy S Diffractometer was purchased with Support from the MRI program by the National Science Foundation under Grant No. 1919565.**

## Structure Quality Indicators

|                     |                           |              |          |             |          |              |                              |              |
|---------------------|---------------------------|--------------|----------|-------------|----------|--------------|------------------------------|--------------|
| <b>Reflections:</b> | d min (Cu\α)<br>2θ=160.3° | <b>0.78</b>  | I/σ(I)   | <b>47.4</b> | Rint     | <b>3.19%</b> | Full 135.4°<br>99% to 160.3° | <b>100</b>   |
| <b>Refinement:</b>  | Shift                     | <b>0.001</b> | Max Peak | <b>0.2</b>  | Min Peak | <b>-0.3</b>  | Goof                         | <b>1.084</b> |

A colourless irregular-shaped crystal with dimensions 0.21×0.16×0.14 mm<sup>3</sup> was mounted on a nylon loop with paratone oil. Data were collected using a XtaLAB Synergy, Dualflex, HyPix diffractometer equipped with an Oxford Cryosystems low-temperature device, operating at  $T = 100.00(10)$  K.

MSU Data were measured using  $\omega$  scans using Cu K $\alpha$  radiation (micro-focus sealed X-ray tube, 50 kV, 1 mA). The total number of runs and images was based on the strategy calculation from the program CrysAlisPro 1.171.42.60a (Rigaku OD, 2022). The achieved resolution was  $\theta = 80.158$ .

Cell parameters were retrieved using the CrysAlisPro 1.171.42.60a (Rigaku OD, 2022) software and refined using CrysAlisPro 1.171.42.60a (Rigaku OD, 2022) on 10444 reflections, 61 % of the observed reflections. Data reduction was performed using the CrysAlisPro 1.171.42.60a (Rigaku OD, 2022) software which corrects for Lorentz polarization. The final completeness is 100.00 out to 80.158 in  $\theta$  CrysAlisPro 1.171.42.60a (Rigaku Oxford Diffraction, 2022) Numerical absorption correction based on gaussian integration over a multifaceted crystal model Empirical absorption correction using spherical harmonics, implemented in SCALE3 ABSPACK scaling algorithm.

The structure was solved in the space group  $P2_1/n$  (# 14) by using dual methods using the ShelXT (Sheldrick, 2015) structure solution program. The structure was refined by Least Squares ShelXL incorporated in Olex2 software program. All non-hydrogen atoms were refined anisotropically. Hydrogen atom positions were calculated geometrically and refined using the riding model, except for the hydrogen atom on the non-carbon atom(s) which were found by difference Fourier methods and refined isotropically when data permits.

There is a single molecule in the asymmetric unit, which is represented by the reported sum formula. In other words: Z is 4 and Z' is 1.

**The Rigaku Synergy S Diffractometer was purchased with Support from the MRI program by the National Science Foundation under Grant No. 1919565.**



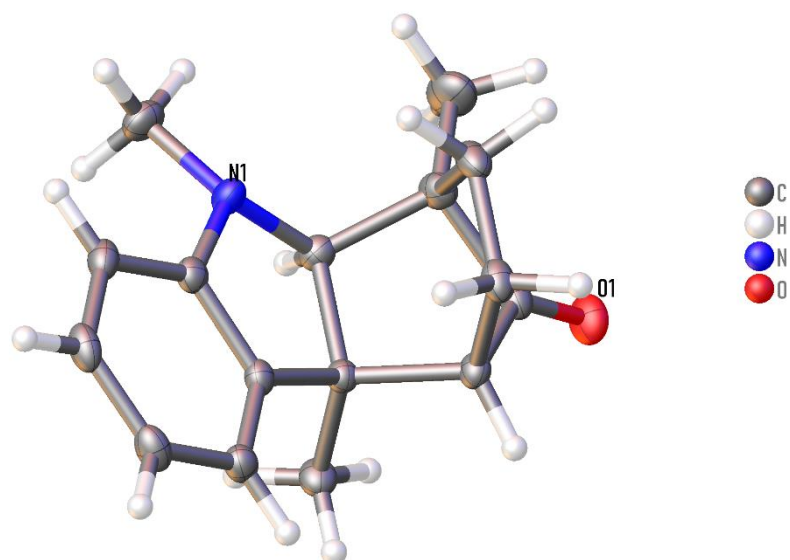

**Figure 1:**

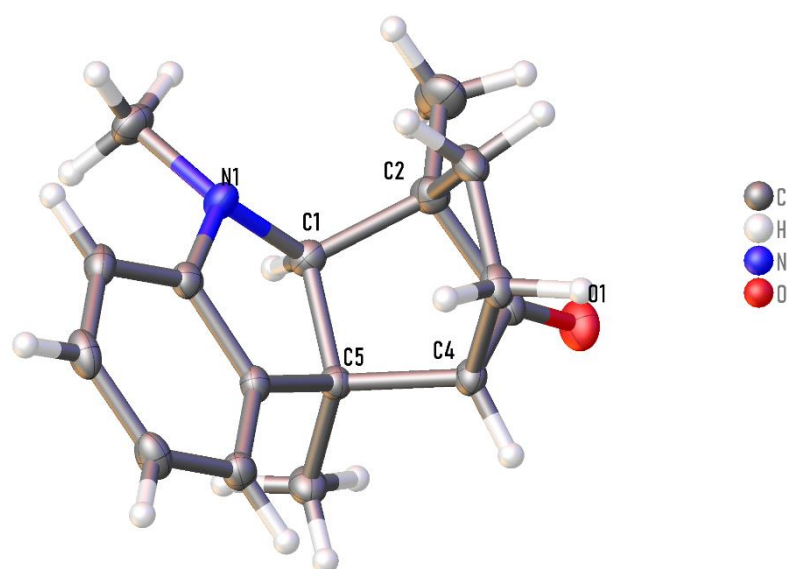

**Figure 2:** Compound resides in a centrosymmetric space group, relative chirality is shown. Model has Chirality at C1 (Centro SPGR) R. Model has Chirality at C2 (Centro SPGR) R. Model has Chirality at C4 (Centro SPGR) S. Model has Chirality at C5 (Centro SPGR) S.

**The Rigaku Synergy S Diffractometer was purchased with Support from the MRI program by the National Science Foundation under Grant No. 1919565.**

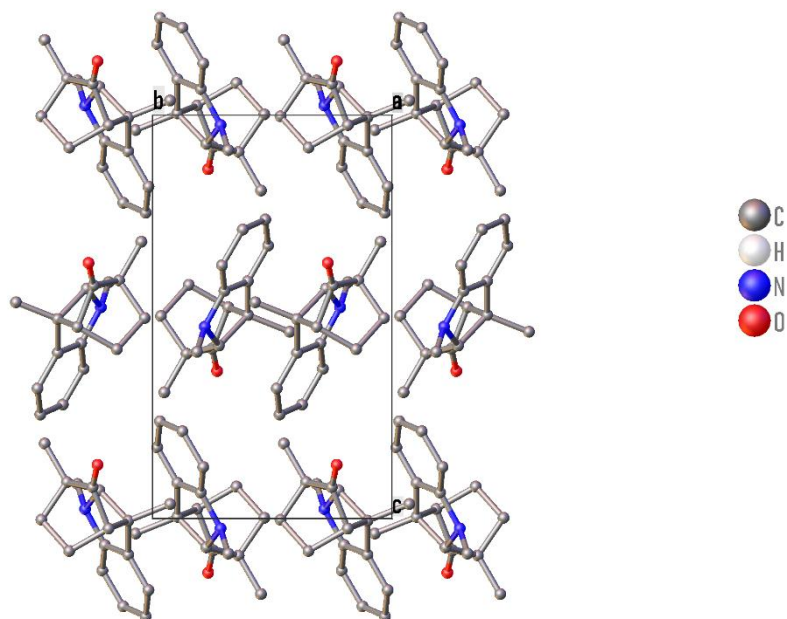

**Figure 3:** Packing diagram of JW722A.

**Data Plots: Diffraction Data**

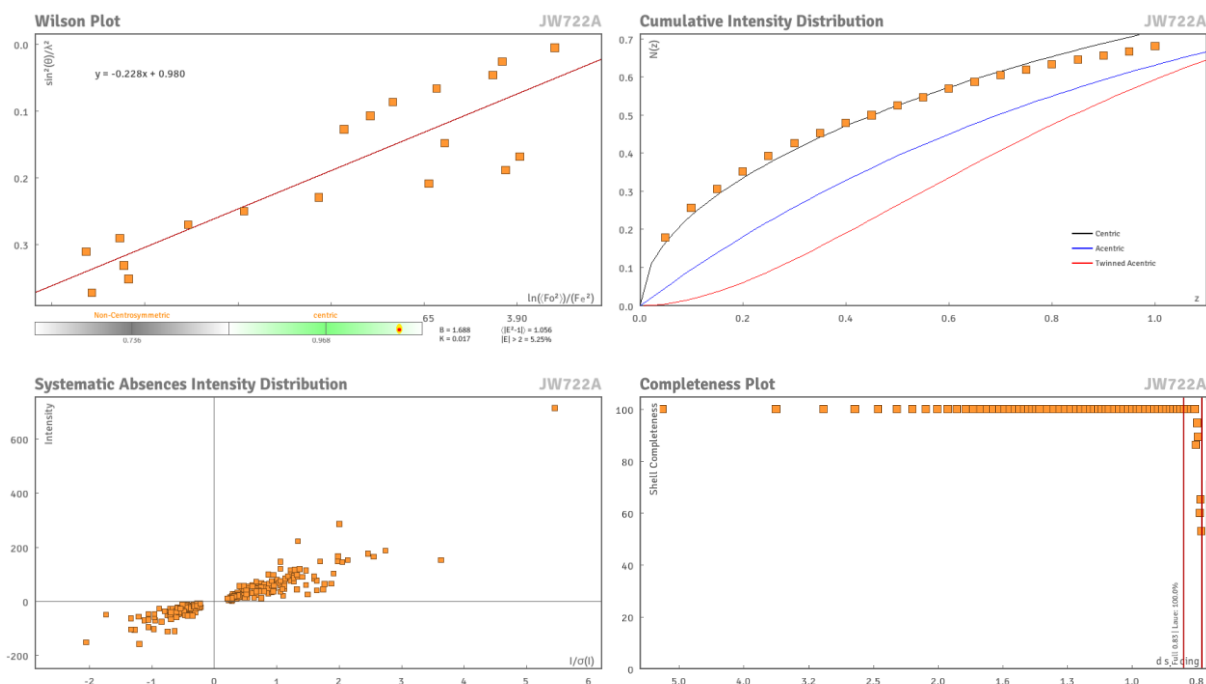

The Rigaku Synergy S Diffractometer was purchased with Support from the MRI program by the National Science Foundation under Grant No. 1919565.

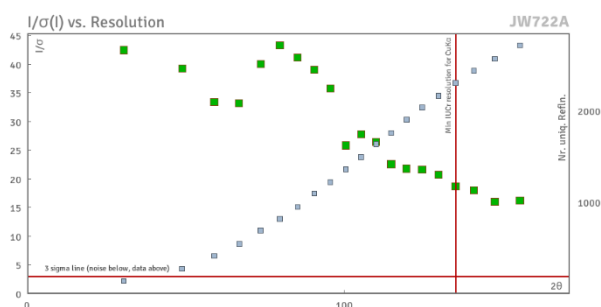

## Data Plots: Refinement and Data

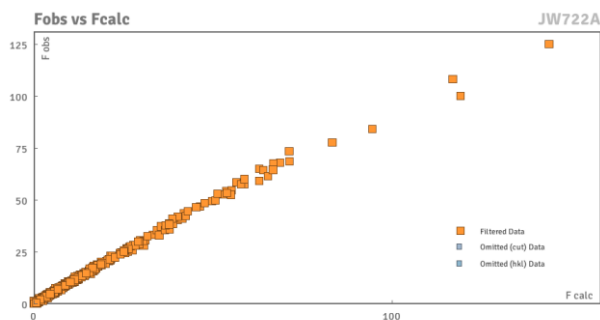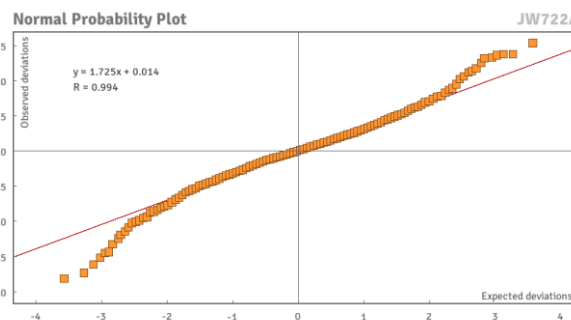

## Reflection Statistics

|                                     |                                                     |                            |                 |
|-------------------------------------|-----------------------------------------------------|----------------------------|-----------------|
| Total reflections (after filtering) | 17668                                               | Unique reflections         | 2813            |
| Completeness                        | 0.987                                               | Mean $I/\sigma$            | 29.28           |
| $hkl_{\max}$ collected              | (14, 9, 17)                                         | $hkl_{\min}$ collected     | (-15, -10, -18) |
| $hkl_{\max}$ used                   | (14, 10, 18)                                        | $hkl_{\min}$ used          | (-15, 0, 0)     |
| Lim $d_{\max}$ collected            | 100.0                                               | Lim $d_{\min}$ collected   | 0.77            |
| $d_{\max}$ used                     | 13.63                                               | $d_{\min}$ used            | 0.78            |
| Friedel pairs                       | 2504                                                | Friedel pairs merged       | 1               |
| Inconsistent equivalents            | 2                                                   | $R_{\text{int}}$           | 0.0319          |
| $R_{\text{sigma}}$                  | 0.0211                                              | Intensity transformed      | 0               |
| Omitted reflections                 | 0                                                   | Omitted by user (OMIT hkl) | 0               |
| Multiplicity                        | (3016, 2111, 1281, 679, 369, 187, 61, 34, 8, 10, 3) | Maximum multiplicity       | 20              |
| Removed systematic absences         | 616                                                 | Filtered off (Shel/OMIT)   | 0               |

## Selected Crystal Pictures

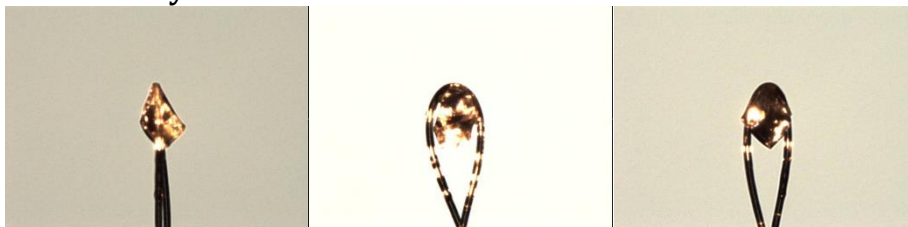

The Rigaku Synergy S Diffractometer was purchased with Support from the MRI program by the National Science Foundation under Grant No. 1919565.

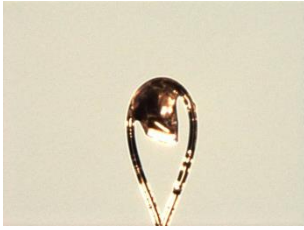

**Table 1:** Fractional Atomic Coordinates ( $\times 10^4$ ) and Equivalent Isotropic Displacement Parameters ( $\text{\AA}^2 \times 10^3$ ) for **JW722A**.  $U_{eq}$  is defined as 1/3 of the trace of the orthogonalised  $U_{ij}$ .

| Atom | x          | y          | z          | $U_{eq}$ |
|------|------------|------------|------------|----------|
| O1   | 9326.2(7)  | 2313.3(10) | 8661.4(6)  | 26.8(2)  |
| N1   | 6022.6(7)  | 2828.9(11) | 9759.7(6)  | 18.9(2)  |
| C1   | 6855.2(9)  | 2235.9(12) | 9293.3(7)  | 17.8(2)  |
| C2   | 7671.1(10) | 3589.9(13) | 9091.2(7)  | 21.3(2)  |
| C3   | 8791.6(9)  | 2520.1(13) | 9216.7(7)  | 19.3(2)  |
| C4   | 9023.3(9)  | 1850.3(12) | 10243.6(7) | 17.1(2)  |
| C5   | 7768.9(8)  | 1025.2(12) | 10047.4(7) | 15.5(2)  |
| C6   | 7314.9(8)  | 1028.2(12) | 10889.0(7) | 15.9(2)  |
| C7   | 7748.7(9)  | 181.6(13)  | 11767.9(7) | 19.6(2)  |
| C8   | 7124.4(10) | 297.9(14)  | 12415.8(7) | 23.3(2)  |
| C9   | 6076.9(10) | 1238.7(13) | 12168.6(8) | 23.1(2)  |
| C10  | 5632.8(9)  | 2106.9(13) | 11283.1(8) | 20.6(2)  |
| C11  | 6271.1(9)  | 2007.6(12) | 10649.2(7) | 16.9(2)  |
| C13  | 8212.3(10) | 4660.0(13) | 10024.2(8) | 23.4(2)  |
| C14  | 9116.6(9)  | 3494.5(13) | 10798.0(7) | 20.8(2)  |
| C16  | 7128.8(12) | 4519.8(17) | 8135.6(9)  | 34.8(3)  |
| C17  | 4769.9(9)  | 3152.6(14) | 9137.4(8)  | 25.3(2)  |
| C18  | 7749.9(10) | -718.1(13) | 9634.6(8)  | 21.7(2)  |

**Table 2:** Anisotropic Displacement Parameters ( $\times 10^4$ ) for **JW722A**. The anisotropic displacement factor exponent takes the form:  $-2\pi^2[h^2a^{*2} \times U_{11} + \dots + 2hka^* \times b^* \times U_{12}]$

| Atom | $U_{11}$ | $U_{22}$ | $U_{33}$ | $U_{23}$ | $U_{13}$ | $U_{12}$ |
|------|----------|----------|----------|----------|----------|----------|
| O1   | 30.0(4)  | 32.0(4)  | 25.7(4)  | -4.3(3)  | 18.9(3)  | -3.6(3)  |
| N1   | 15.2(4)  | 22.3(4)  | 19.5(4)  | 2.3(3)   | 6.8(3)   | 2.7(3)   |
| C1   | 17.8(5)  | 20.0(5)  | 15.6(4)  | -0.3(3)  | 6.1(4)   | 1.2(4)   |
| C2   | 25.2(5)  | 21.1(5)  | 21.3(5)  | 4.3(4)   | 12.8(4)  | 2.2(4)   |
| C3   | 22.0(5)  | 18.2(5)  | 20.6(5)  | -2.9(4)  | 11.3(4)  | -4.6(4)  |
| C4   | 16.1(4)  | 18.4(5)  | 18.9(5)  | -1.7(4)  | 8.8(4)   | -0.8(3)  |
| C5   | 15.5(4)  | 15.5(4)  | 16.2(4)  | -0.6(3)  | 6.7(3)   | -0.7(3)  |
| C6   | 15.0(4)  | 16.5(4)  | 17.1(4)  | -1.7(3)  | 6.9(4)   | -3.1(3)  |
| C7   | 17.9(5)  | 20.4(5)  | 20.2(5)  | 1.7(4)   | 6.5(4)   | -2.1(4)  |
| C8   | 25.4(5)  | 27.0(5)  | 17.9(5)  | 1.5(4)   | 8.2(4)   | -7.6(4)  |
| C9   | 25.8(5)  | 25.7(5)  | 23.5(5)  | -5.7(4)  | 15.7(4)  | -9.4(4)  |
| C10  | 17.5(5)  | 20.5(5)  | 26.7(5)  | -5.0(4)  | 11.6(4)  | -3.3(4)  |
| C11  | 15.8(4)  | 16.5(4)  | 18.2(5)  | -2.1(3)  | 6.1(4)   | -3.0(3)  |
| C13  | 27.7(5)  | 16.2(5)  | 32.5(6)  | -1.9(4)  | 18.3(5)  | -2.3(4)  |
| C14  | 22.1(5)  | 20.9(5)  | 23.0(5)  | -6.3(4)  | 12.3(4)  | -6.4(4)  |
| C16  | 39.5(7)  | 38.3(7)  | 30.7(6)  | 16.3(5)  | 17.6(5)  | 7.1(5)   |
| C17  | 17.3(5)  | 27.9(6)  | 26.9(5)  | 1.0(4)   | 3.1(4)   | 3.8(4)   |
| C18  | 23.2(5)  | 17.7(5)  | 26.5(5)  | -4.6(4)  | 11.5(4)  | -1.7(4)  |

**The Rigaku Synergy S Diffractometer was purchased with Support from the MRI program by the National Science Foundation under Grant No. 1919565.**

**Table 3:** Bond Lengths in Å for JW722A.

| Atom | Atom | Length/Å   | Atom | Atom | Length/Å   |
|------|------|------------|------|------|------------|
| O1   | C3   | 1.2068(12) | C4   | C14  | 1.5396(13) |
| N1   | C1   | 1.4655(12) | C5   | C6   | 1.5092(12) |
| N1   | C11  | 1.3936(13) | C5   | C18  | 1.5298(13) |
| N1   | C17  | 1.4552(13) | C6   | C7   | 1.3808(13) |
| C1   | C2   | 1.5559(14) | C6   | C11  | 1.4001(13) |
| C1   | C5   | 1.5750(13) | C7   | C8   | 1.3983(14) |
| C2   | C3   | 1.5365(14) | C8   | C9   | 1.3855(16) |
| C2   | C13  | 1.5453(15) | C9   | C10  | 1.3976(15) |
| C2   | C16  | 1.5103(14) | C10  | C11  | 1.3926(13) |
| C3   | C4   | 1.5248(13) | C13  | C14  | 1.5612(15) |
| C4   | C5   | 1.5554(13) |      |      |            |

**Table 4:** Bond Angles in ° for JW722A.

| Atom | Atom | Atom | Angle/°    | Atom | Atom | Atom | Angle/°    |
|------|------|------|------------|------|------|------|------------|
| C11  | N1   | C1   | 109.11(8)  | C4   | C5   | C1   | 103.31(7)  |
| C11  | N1   | C17  | 119.57(8)  | C6   | C5   | C1   | 102.34(7)  |
| C17  | N1   | C1   | 118.10(8)  | C6   | C5   | C4   | 116.41(8)  |
| N1   | C1   | C2   | 115.14(8)  | C6   | C5   | C18  | 111.35(8)  |
| N1   | C1   | C5   | 106.48(7)  | C18  | C5   | C1   | 112.79(8)  |
| C2   | C1   | C5   | 104.73(8)  | C18  | C5   | C4   | 110.18(8)  |
| C3   | C2   | C1   | 98.53(8)   | C7   | C6   | C5   | 129.47(9)  |
| C3   | C2   | C13  | 98.33(8)   | C7   | C6   | C11  | 120.74(9)  |
| C13  | C2   | C1   | 108.28(8)  | C11  | C6   | C5   | 109.72(8)  |
| C16  | C2   | C1   | 116.12(9)  | C6   | C7   | C8   | 119.16(9)  |
| C16  | C2   | C3   | 116.78(9)  | C9   | C8   | C7   | 120.05(10) |
| C16  | C2   | C13  | 116.12(10) | C8   | C9   | C10  | 121.26(9)  |
| O1   | C3   | C2   | 129.48(10) | C11  | C10  | C9   | 118.34(9)  |
| O1   | C3   | C4   | 131.40(10) | N1   | C11  | C6   | 111.90(8)  |
| C4   | C3   | C2   | 99.11(8)   | C10  | C11  | N1   | 127.66(9)  |
| C3   | C4   | C5   | 98.62(7)   | C10  | C11  | C6   | 120.42(9)  |
| C3   | C4   | C14  | 99.50(8)   | C2   | C13  | C14  | 105.02(8)  |
| C14  | C4   | C5   | 110.47(8)  | C4   | C14  | C13  | 103.83(8)  |

**Table 5:** Torsion Angles in ° for JW722A.

| Atom | Atom | Atom | Atom | Angle/°     |
|------|------|------|------|-------------|
| O1   | C3   | C4   | C5   | -123.88(12) |
| O1   | C3   | C4   | C14  | 123.55(12)  |
| N1   | C1   | C2   | C3   | 148.13(8)   |
| N1   | C1   | C2   | C13  | 46.37(11)   |
| N1   | C1   | C2   | C16  | -86.35(11)  |
| N1   | C1   | C5   | C4   | -119.85(8)  |
| N1   | C1   | C5   | C6   | 1.46(9)     |
| N1   | C1   | C5   | C18  | 121.21(9)   |
| C1   | N1   | C11  | C6   | 7.17(11)    |
| C1   | N1   | C11  | C10  | -174.51(9)  |
| C1   | C2   | C3   | O1   | 125.85(11)  |
| C1   | C2   | C3   | C4   | -55.25(8)   |
| C1   | C2   | C13  | C14  | 68.65(10)   |
| C1   | C5   | C6   | C7   | 179.48(10)  |

**The Rigaku Synergy S Diffractometer was purchased with Support from the MRI program by the National Science Foundation under Grant No. 1919565.**

| Atom | Atom | Atom | Atom | Angle/°     |
|------|------|------|------|-------------|
| C1   | C5   | C6   | C11  | 2.65(10)    |
| C2   | C1   | C5   | C4   | 2.55(9)     |
| C2   | C1   | C5   | C6   | 123.86(8)   |
| C2   | C1   | C5   | C18  | -116.39(9)  |
| C2   | C3   | C4   | C5   | 57.25(9)    |
| C2   | C3   | C4   | C14  | -55.33(9)   |
| C2   | C13  | C14  | C4   | 0.19(10)    |
| C3   | C2   | C13  | C14  | -33.25(9)   |
| C3   | C4   | C5   | C1   | -35.99(9)   |
| C3   | C4   | C5   | C6   | -147.26(8)  |
| C3   | C4   | C5   | C18  | 84.74(9)    |
| C3   | C4   | C14  | C13  | 33.36(9)    |
| C4   | C5   | C6   | C7   | -68.69(13)  |
| C4   | C5   | C6   | C11  | 114.48(9)   |
| C5   | C1   | C2   | C3   | 31.55(9)    |
| C5   | C1   | C2   | C13  | -70.21(9)   |
| C5   | C1   | C2   | C16  | 157.07(9)   |
| C5   | C4   | C14  | C13  | -69.63(9)   |
| C5   | C6   | C7   | C8   | -175.84(9)  |
| C5   | C6   | C11  | N1   | -6.20(11)   |
| C5   | C6   | C11  | C10  | 175.35(8)   |
| C6   | C7   | C8   | C9   | 0.71(15)    |
| C7   | C6   | C11  | N1   | 176.65(9)   |
| C7   | C6   | C11  | C10  | -1.81(14)   |
| C7   | C8   | C9   | C10  | -1.02(16)   |
| C8   | C9   | C10  | C11  | -0.08(15)   |
| C9   | C10  | C11  | N1   | -176.71(9)  |
| C9   | C10  | C11  | C6   | 1.47(14)    |
| C11  | N1   | C1   | C2   | -120.69(9)  |
| C11  | N1   | C1   | C5   | -5.12(10)   |
| C11  | C6   | C7   | C8   | 0.69(15)    |
| C13  | C2   | C3   | O1   | -124.12(11) |
| C13  | C2   | C3   | C4   | 54.79(9)    |
| C14  | C4   | C5   | C1   | 67.59(9)    |
| C14  | C4   | C5   | C6   | -43.68(11)  |
| C14  | C4   | C5   | C18  | -171.68(8)  |
| C16  | C2   | C3   | O1   | 0.79(17)    |
| C16  | C2   | C3   | C4   | 179.70(10)  |
| C16  | C2   | C13  | C14  | -158.63(9)  |
| C17  | N1   | C1   | C2   | 98.33(11)   |
| C17  | N1   | C1   | C5   | -146.10(9)  |
| C17  | N1   | C11  | C6   | 147.48(9)   |
| C17  | N1   | C11  | C10  | -34.20(15)  |
| C18  | C5   | C6   | C7   | 58.73(13)   |
| C18  | C5   | C6   | C11  | -118.10(9)  |

**Table 6:** Hydrogen Fractional Atomic Coordinates ( $\times 10^4$ ) and Equivalent Isotropic Displacement Parameters ( $\text{\AA}^2 \times 10^3$ ) for **JW722A**.  $U_{eq}$  is defined as 1/3 of the trace of the orthogonalised  $U_{ij}$ .

| Atom | x       | y       | z        | $U_{eq}$ |
|------|---------|---------|----------|----------|
| H1   | 6394.33 | 1632.5  | 8673.23  | 21       |
| H4   | 9739.41 | 1098.83 | 10512.06 | 21       |
| H7   | 8462.37 | -471.68 | 11930.31 | 24       |
| H8   | 7418.65 | -268.66 | 13026.03 | 28       |
| H9   | 5652.45 | 1294.85 | 12609.45 | 28       |

**The Rigaku Synergy S Diffractometer was purchased with Support from the MRI program by the National Science Foundation under Grant No. 1919565.**

| Atom | x       | y        | z        | $U_{eq}$ |
|------|---------|----------|----------|----------|
| H10  | 4913.39 | 2748.66  | 11117.75 | 25       |
| H13A | 7567.49 | 5048.22  | 10255.55 | 28       |
| H13B | 8640.44 | 5633.81  | 9895.14  | 28       |
| H14A | 9952.39 | 3939.84  | 11017.72 | 25       |
| H14B | 8877.29 | 3348.85  | 11375.9  | 25       |
| H16A | 6477.23 | 5241.98  | 8165.56  | 52       |
| H16B | 6799.16 | 3729.75  | 7595.8   | 52       |
| H16C | 7758.2  | 5191     | 8025.41  | 52       |
| H17A | 4331.08 | 2102.52  | 8956.46  | 38       |
| H17B | 4750.34 | 3731.57  | 8542.81  | 38       |
| H17C | 4384.53 | 3841.78  | 9493.75  | 38       |
| H18A | 8324.1  | -1422.37 | 10134.11 | 33       |
| H18B | 7981.91 | -667.43  | 9055.69  | 33       |
| H18C | 6931.68 | -1181.31 | 9449.43  | 33       |

### Citations

**CrysAlisPro** (Rigaku, V1.171.42.60a, 2022)

CrysAlisPro (ROD), Rigaku Oxford Diffraction, Poland (?).

O.V. Dolomanov and L.J. Bourhis and R.J. Gildea and J.A.K. Howard and H. Puschmann, Olex2: A complete structure solution, refinement and analysis program, *J. Appl. Cryst.*, (2009), **42**, 339-341.

Sheldrick, G.M., Crystal structure refinement with ShelXL, *Acta Cryst.*, (2015), **C71**, 3-8.

Sheldrick, G.M., ShelXT-Integrated space-group and crystal-structure determination, *Acta Cryst.*, (2015), **A71**, 3-8.

**The Rigaku Synergy S Diffractometer was purchased with Support from the MRI program by the National Science Foundation under Grant No. 1919565.**

# Compound 13a

Submitted by: **Jimmy Wu**

Date Collected: **July 5, 2022**

Solved by: **Richard J Staples**

Sample ID: **ZTP-3-143-minor**

Relative chirality determined for the crystal supplied.

## Crystal Data and Experimental

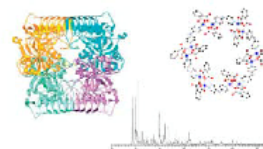

Center Crystallographic for Research  
Michigan State University  
Department of Chemistry  
East Lansing, MI 48824  
**Dr. Richard J. Staples**  
staples@chemistry.msu.edu

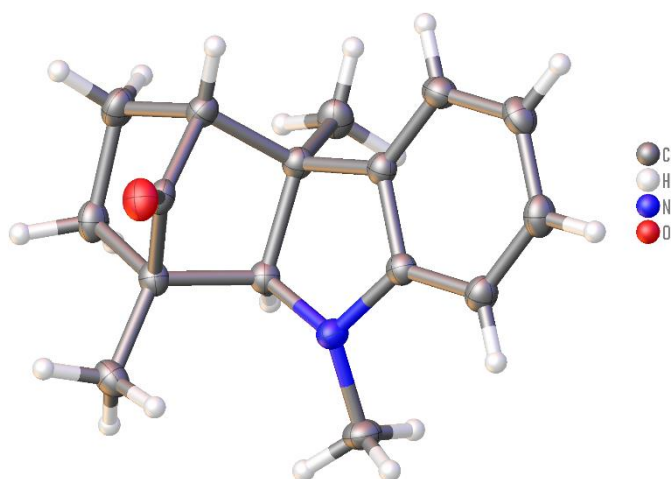

**Experimental.** Single colourless irregular-shaped crystals of **JW722B** Used as recieved. A suitable crystal with dimensions  $0.22 \times 0.20 \times 0.06 \text{ mm}^3$  was selected and mounted on a nylon loop with paratone oil on a XtaLAB Synergy, Dualflex, HyPix diffractometer. The crystal was kept at a steady  $T = 100.00(10) \text{ K}$  during data collection. The structure was solved with the **ShelXT** (Sheldrick, 2015) solution program using dual methods and by using **Olex2** 1.5 (Dolomanov et al., 2009) as the graphical interface. The model was refined with **ShelXL** 2018/3 (Sheldrick, 2015) using full matrix least squares minimisation on  $F^2$ .

**Crystal Data.**  $\text{C}_{16}\text{H}_{19}\text{NO}$ ,  $M_r = 241.32$ , monoclinic,  $P2_1/c$  (No. 14),  $a = 16.0584(2) \text{ \AA}$ ,  $b = 6.13979(7) \text{ \AA}$ ,  $c = 13.79498(19) \text{ \AA}$ ,  $\beta = 107.5140(15)^\circ$ ,  $\alpha = \gamma = 90^\circ$ ,  $V = 1297.07(3) \text{ \AA}^3$ ,  $T = 100.00(10) \text{ K}$ ,  $Z = 4$ ,  $Z' = 1$ ,  $\mu(\text{Cu K}\alpha) = 0.595$ , 18674 reflections measured, 2798 unique ( $R_{\text{int}} = 0.0363$ ) which were used in all calculations. The final  $wR_2$  was 0.1011 (all data) and  $R_1$  was 0.0376 ( $I \geq 2 \sigma(I)$ ).

| Compound                              | JW722B                                |
|---------------------------------------|---------------------------------------|
| Formula                               | $\text{C}_{16}\text{H}_{19}\text{NO}$ |
| $D_{\text{calc.}} / \text{g cm}^{-3}$ | 1.236                                 |
| $\mu / \text{mm}^{-1}$                | 0.595                                 |
| Formula Weight                        | 241.32                                |
| Color                                 | colourless                            |
| Shape                                 | irregular-shaped                      |
| Size/ $\text{mm}^3$                   | $0.22 \times 0.20 \times 0.06$        |
| $T / \text{K}$                        | 100.00(10)                            |
| Crystal System                        | monoclinic                            |
| Space Group                           | $P2_1/c$                              |
| $a / \text{Å}$                        | 16.0584(2)                            |
| $b / \text{Å}$                        | 6.13979(7)                            |
| $c / \text{Å}$                        | 13.79498(19)                          |
| $\alpha / ^\circ$                     | 90                                    |
| $\beta / ^\circ$                      | 107.5140(15)                          |
| $\gamma / ^\circ$                     | 90                                    |
| $V / \text{Å}^3$                      | 1297.07(3)                            |
| $Z$                                   | 4                                     |
| $Z'$                                  | 1                                     |
| Wavelength/ $\text{Å}$                | 1.54184                               |
| Radiation type                        | Cu $K\alpha$                          |
| $\theta_{\text{min}} / ^\circ$        | 2.886                                 |
| $\theta_{\text{max}} / ^\circ$        | 79.865                                |
| Measured Refl's.                      | 18674                                 |
| Indep't Refl's                        | 2798                                  |
| Refl's $I \geq 2 \sigma(I)$           | 2570                                  |
| $R_{\text{int}}$                      | 0.0363                                |
| Parameters                            | 167                                   |
| Restraints                            | 0                                     |
| Largest Peak                          | 0.306                                 |
| Deepest Hole                          | -0.192                                |
| GooF                                  | 1.078                                 |
| $wR_2$ (all data)                     | 0.1011                                |
| $wR_2$                                | 0.0987                                |
| $R_1$ (all data)                      | 0.0402                                |
| $R_1$                                 | 0.0376                                |

**The Rigaku Synergy S Diffractometer was purchased with Support from the MRI program by the National Science Foundation under Grant No. 1919565.**



## Structure Quality Indicators

|                     |                           |        |          |      |                  |       |                              |       |
|---------------------|---------------------------|--------|----------|------|------------------|-------|------------------------------|-------|
| <b>Reflections:</b> | d min (Cu\α)<br>2θ=159.7° | 0.78   | I/σ(I)   | 40.5 | R <sub>int</sub> | 3.63% | Full 135.4°<br>99% to 159.7° | 100   |
| <b>Refinement:</b>  | Shift                     | -0.001 | Max Peak | 0.3  | Min Peak         | -0.2  | Goof                         | 1.078 |

A colourless irregular-shaped crystal with dimensions 0.22×0.20×0.06 mm<sup>3</sup> was mounted on a nylon loop with paratone oil. Data were collected using a XtaLAB Synergy, Dualflex, HyPix diffractometer equipped with an Oxford Cryosystems low-temperature device, operating at  $T = 100.00(10)$  K.

MSU Data were measured using  $\omega$  scans using Cu K $\alpha$  radiation (micro-focus sealed X-ray tube, 50 kV, 1 mA). The total number of runs and images was based on the strategy calculation from the program CrysAlisPro 1.171.42.60a (Rigaku OD, 2022). The achieved resolution was  $\theta = 79.865$ .

Cell parameters were retrieved using the CrysAlisPro 1.171.42.60a (Rigaku OD, 2022) software and refined using CrysAlisPro 1.171.42.60a (Rigaku OD, 2022) on 11062 reflections, 59 % of the observed reflections. Data reduction was performed using the CrysAlisPro 1.171.42.60a (Rigaku OD, 2022) software which corrects for Lorentz polarization. The final completeness is 100.00 out to 79.865 in  $\theta$  CrysAlisPro 1.171.42.60a (Rigaku Oxford Diffraction, 2022) Numerical absorption correction based on gaussian integration over a multifaceted crystal model Empirical absorption correction using spherical harmonics, implemented in SCALE3 ABSPACK scaling algorithm.

The structure was solved in the space group  $P2_1/c$  (# 14) by using dual methods using the ShelXT (Sheldrick, 2015) structure solution program. The structure was refined by Least Squares ShelXL incorporated in Olex2 software program. All non-hydrogen atoms were refined anisotropically. Hydrogen atom positions were calculated geometrically and refined using the riding model, except for the hydrogen atom on the non-carbon atom(s) which were found by difference Fourier methods and refined isotropically when data permits.

There is a single molecule in the asymmetric unit, which is represented by the reported sum formula. In other words: Z is 4 and Z' is 1.

**The Rigaku Synergy S Diffractometer was purchased with Support from the MRI program by the National Science Foundation under Grant No. 1919565.**

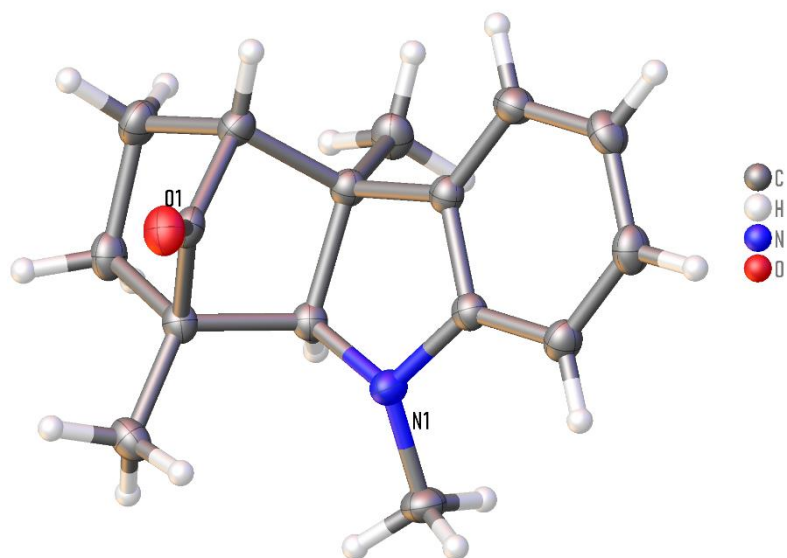

**Figure 4:**

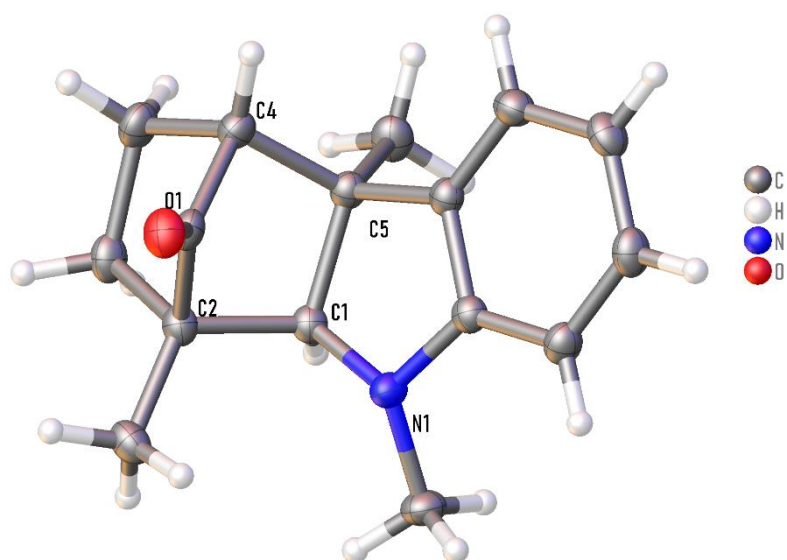

**Figure 5:** Compound resides in a centrosymmetric space group, relative chirality is shown. Model has Chirality at C1 (Centro SPGR) R. Model has Chirality at C2 (Centro SPGR) S. Model has Chirality at C4 (Centro SPGR) R. Model has Chirality at C5 (Centro SPGR) S.

**The Rigaku Synergy S Diffractometer was purchased with Support from the MRI program by the National Science Foundation under Grant No. 1919565.**

## Data Plots: Diffraction Data

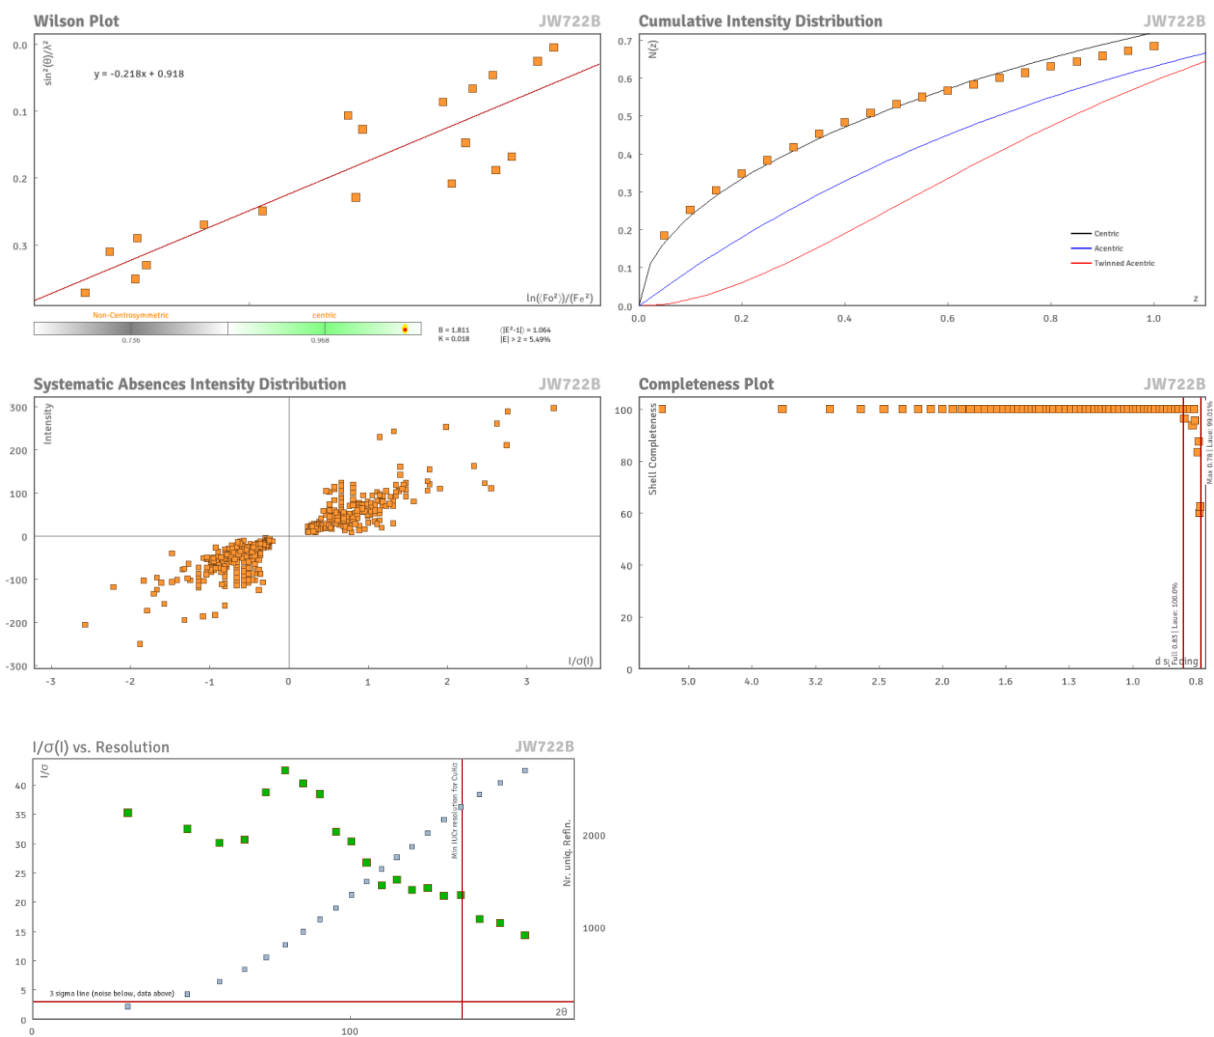

## Data Plots: Refinement and Data

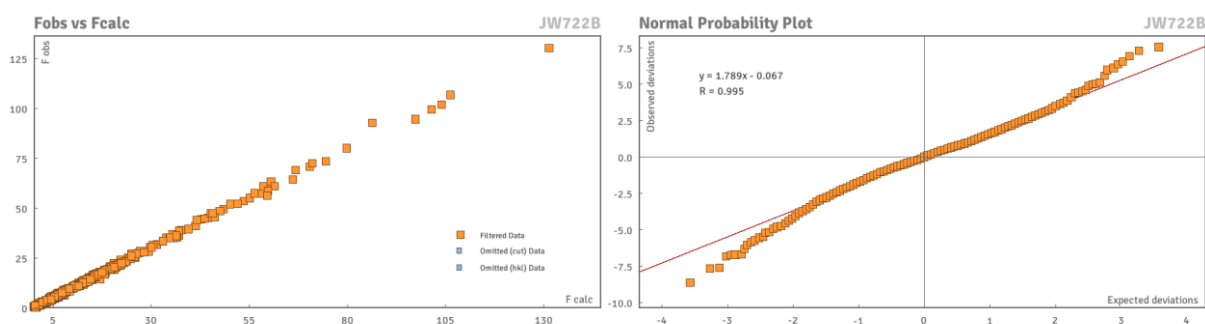

## Reflection Statistics

|                                     |             |                          |                |
|-------------------------------------|-------------|--------------------------|----------------|
| Total reflections (after filtering) | 19780       | Unique reflections       | 2798           |
| Completeness                        | 0.99        | Mean $I/\sigma$          | 28.11          |
| $hkl_{\max}$ collected              | (20, 7, 14) | $hkl_{\min}$ collected   | (-20, -7, -17) |
| $hkl_{\max}$ used                   | (19, 7, 17) | $hkl_{\min}$ used        | (-20, 0, 0)    |
| Lim $d_{\max}$ collected            | 100.0       | Lim $d_{\min}$ collected | 0.77           |

The Rigaku Synergy S Diffractometer was purchased with Support from the MRI program by the National Science Foundation under Grant No. 1919565.

|                             |                                                                   |                            |        |
|-----------------------------|-------------------------------------------------------------------|----------------------------|--------|
| $d_{\max}$ used             | 15.31                                                             | $d_{\min}$ used            | 0.78   |
| Friedel pairs               | 1508                                                              | Friedel pairs merged       | 1      |
| Inconsistent equivalents    | 0                                                                 | $R_{\text{int}}$           | 0.0363 |
| $R_{\text{sigma}}$          | 0.0247                                                            | Intensity transformed      | 0      |
| Omitted reflections         | 0                                                                 | Omitted by user (OMIT hkl) | 0      |
| Multiplicity                | (2284, 1692, 1117, 636, 421, 274, 167, 111, 82, 75, 47, 25, 6, 2) | Maximum multiplicity       | 24     |
| Removed systematic absences | 1106                                                              | Filtered off (Shel/OMIT)   | 0      |

### Selected Crystal Pictures

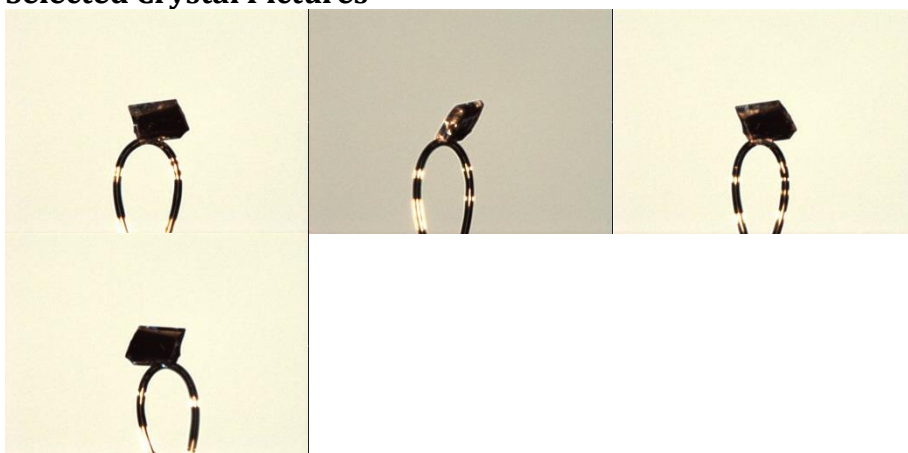

**Table 7:** Fractional Atomic Coordinates ( $\times 10^4$ ) and Equivalent Isotropic Displacement Parameters ( $\text{\AA}^2 \times 10^3$ ) for **JW722B**.  $U_{eq}$  is defined as 1/3 of the trace of the orthogonalised  $U_{ij}$ .

| Atom | x         | y          | z         | $U_{eq}$  |
|------|-----------|------------|-----------|-----------|
| O1   | 1377.8(5) | 9716.6(12) | 7959.7(6) | 26.29(19) |
| N1   | 2919.4(5) | 5244.5(14) | 8459.6(6) | 20.6(2)   |
| C11  | 3532.0(6) | 6733.5(16) | 8338.8(7) | 19.0(2)   |
| C1   | 2224.1(6) | 4976.6(16) | 7495.7(7) | 18.7(2)   |
| C3   | 1444.6(6) | 8213.5(16) | 7424.2(8) | 20.0(2)   |
| C6   | 3276.7(6) | 7674.9(16) | 7370.2(7) | 19.0(2)   |
| C5   | 2453.1(6) | 6583.2(16) | 6712.0(7) | 19.3(2)   |
| C16  | 1057.6(7) | 5089.6(18) | 8467.5(8) | 25.2(2)   |
| C10  | 4311.6(7) | 7346.4(18) | 9056.5(8) | 23.2(2)   |
| C2   | 1321.7(6) | 5772.5(16) | 7548.7(7) | 19.9(2)   |
| C17  | 3193.1(7) | 3341.4(18) | 9102.5(8) | 26.3(2)   |
| C8   | 4560.5(7) | 9924.3(18) | 7837.4(9) | 25.9(2)   |
| C9   | 4816.9(7) | 8945.7(18) | 8786.9(8) | 25.5(2)   |
| C13  | 663.6(7)  | 5248.0(18) | 6499.6(8) | 25.0(2)   |
| C7   | 3780.0(7) | 9279.9(18) | 7121.8(8) | 23.4(2)   |
| C4   | 1663.4(6) | 8174.7(17) | 6421.6(8) | 21.7(2)   |
| C14  | 837.5(7)  | 7008.2(19) | 5765.4(8) | 26.9(2)   |
| C18  | 2625.9(7) | 5413.4(19) | 5813.5(8) | 26.4(2)   |

**Table 8:** Anisotropic Displacement Parameters ( $\times 10^4$ ) for **JW722B**. The anisotropic displacement factor exponent takes the form:  $-2\pi^2 [h^2 a^{*2} \times U_{11} + \dots + 2hka^* \times b^* \times U_{12}]$

| Atom | $U_{11}$ | $U_{22}$ | $U_{33}$ | $U_{23}$ | $U_{13}$ | $U_{12}$ |
|------|----------|----------|----------|----------|----------|----------|
| O1   | 25.1(4)  | 21.8(4)  | 32.6(4)  | -6.4(3)  | 9.7(3)   | 1.3(3)   |

**The Rigaku Synergy S Diffractometer was purchased with Support from the MRI program by the National Science Foundation under Grant No. 1919565.**

| Atom | $U_{11}$ | $U_{22}$ | $U_{33}$ | $U_{23}$ | $U_{13}$ | $U_{12}$ |
|------|----------|----------|----------|----------|----------|----------|
| N1   | 19.1(4)  | 20.5(4)  | 20.7(4)  | 2.9(3)   | 3.9(3)   | -1.0(3)  |
| C11  | 19.0(5)  | 18.6(5)  | 20.0(5)  | -1.0(4)  | 6.9(4)   | 1.2(4)   |
| C1   | 18.4(4)  | 17.4(5)  | 20.1(5)  | -2.1(3)  | 5.7(4)   | -0.4(3)  |
| C3   | 14.3(4)  | 20.5(5)  | 23.4(5)  | -1.2(4)  | 2.8(4)   | 1.7(3)   |
| C6   | 17.6(4)  | 20.2(5)  | 19.1(5)  | -1.5(4)  | 5.6(4)   | 1.2(4)   |
| C5   | 18.6(5)  | 20.8(5)  | 17.9(4)  | -1.2(4)  | 4.7(4)   | 0.2(4)   |
| C16  | 25.9(5)  | 23.9(5)  | 29.8(5)  | -2.1(4)  | 14.3(4)  | -2.2(4)  |
| C10  | 20.9(5)  | 27.0(5)  | 20.3(5)  | -1.8(4)  | 4.1(4)   | 0.9(4)   |
| C2   | 18.1(4)  | 19.2(5)  | 22.7(5)  | -3.5(4)  | 6.5(4)   | -0.9(4)  |
| C17  | 29.5(5)  | 24.2(5)  | 24.2(5)  | 6.6(4)   | 6.7(4)   | 1.5(4)   |
| C8   | 23.9(5)  | 22.6(5)  | 33.5(6)  | -2.4(4)  | 12.1(4)  | -4.7(4)  |
| C9   | 19.4(5)  | 27.8(5)  | 27.7(5)  | -7.5(4)  | 4.9(4)   | -2.5(4)  |
| C13  | 18.6(5)  | 27.3(5)  | 27.3(5)  | -6.9(4)  | 4.3(4)   | -2.3(4)  |
| C7   | 24.8(5)  | 22.8(5)  | 24.2(5)  | 2.6(4)   | 9.7(4)   | 0.1(4)   |
| C4   | 20.2(5)  | 23.1(5)  | 20.2(5)  | 1.1(4)   | 3.6(4)   | 1.6(4)   |
| C14  | 20.5(5)  | 34.1(6)  | 22.5(5)  | -2.1(4)  | 1.1(4)   | 1.5(4)   |
| C18  | 25.5(5)  | 32.9(6)  | 21.0(5)  | -5.6(4)  | 7.5(4)   | -0.1(4)  |

**Table 9:** Bond Lengths in Å for **JW722B**.

| Atom | Atom | Length/Å   | Atom | Atom | Length/Å   |
|------|------|------------|------|------|------------|
| O1   | C3   | 1.2069(13) | C6   | C7   | 1.3815(14) |
| N1   | C11  | 1.3893(13) | C5   | C4   | 1.5549(14) |
| N1   | C1   | 1.4657(12) | C5   | C18  | 1.5286(14) |
| N1   | C17  | 1.4528(13) | C16  | C2   | 1.5118(14) |
| C11  | C6   | 1.3992(14) | C10  | C9   | 1.3938(16) |
| C11  | C10  | 1.3938(14) | C2   | C13  | 1.5475(13) |
| C1   | C5   | 1.5863(14) | C8   | C9   | 1.3862(16) |
| C1   | C2   | 1.5517(13) | C8   | C7   | 1.3990(15) |
| C3   | C2   | 1.5281(14) | C13  | C14  | 1.5627(16) |
| C3   | C4   | 1.5263(14) | C4   | C14  | 1.5391(14) |
| C6   | C5   | 1.5165(13) |      |      |            |

**Table 10:** Bond Angles in ° for **JW722B**.

| Atom | Atom | Atom | Angle/°    | Atom | Atom | Atom | Angle/°    |
|------|------|------|------------|------|------|------|------------|
| C11  | N1   | C1   | 109.80(8)  | C6   | C5   | C18  | 110.78(8)  |
| C11  | N1   | C17  | 120.49(8)  | C4   | C5   | C1   | 103.18(8)  |
| C17  | N1   | C1   | 118.13(8)  | C18  | C5   | C1   | 113.35(8)  |
| N1   | C11  | C6   | 111.82(8)  | C18  | C5   | C4   | 114.79(8)  |
| N1   | C11  | C10  | 127.56(9)  | C9   | C10  | C11  | 118.12(9)  |
| C10  | C11  | C6   | 120.61(9)  | C3   | C2   | C1   | 98.60(8)   |
| N1   | C1   | C5   | 106.19(7)  | C3   | C2   | C13  | 100.02(8)  |
| N1   | C1   | C2   | 112.90(8)  | C16  | C2   | C1   | 116.98(9)  |
| C2   | C1   | C5   | 104.34(8)  | C16  | C2   | C3   | 116.39(9)  |
| O1   | C3   | C2   | 130.01(10) | C16  | C2   | C13  | 116.20(9)  |
| O1   | C3   | C4   | 130.82(10) | C13  | C2   | C1   | 105.96(8)  |
| C4   | C3   | C2   | 99.17(8)   | C9   | C8   | C7   | 119.51(10) |
| C11  | C6   | C5   | 109.96(9)  | C8   | C9   | C10  | 121.75(10) |
| C7   | C6   | C11  | 120.42(9)  | C2   | C13  | C14  | 104.91(8)  |
| C7   | C6   | C5   | 129.54(9)  | C6   | C7   | C8   | 119.57(10) |
| C6   | C5   | C1   | 101.90(7)  | C3   | C4   | C5   | 99.71(8)   |
| C6   | C5   | C4   | 111.91(8)  | C3   | C4   | C14  | 98.49(8)   |

**The Rigaku Synergy S Diffractometer was purchased with Support from the MRI program by the National Science Foundation under Grant No. 1919565.**

| Atom | Atom | Atom | Angle/°   | Atom | Atom | Atom | Angle/°   |
|------|------|------|-----------|------|------|------|-----------|
| C14  | C4   | C5   | 110.53(8) | C4   | C14  | C13  | 103.36(8) |

**Table 11:** Torsion Angles in ° for **JW722B**.

| Atom | Atom | Atom | Atom | Angle/°     |
|------|------|------|------|-------------|
| O1   | C3   | C2   | C1   | -124.58(11) |
| O1   | C3   | C2   | C16  | 1.39(16)    |
| O1   | C3   | C2   | C13  | 127.41(11)  |
| O1   | C3   | C4   | C5   | 125.05(11)  |
| O1   | C3   | C4   | C14  | -122.28(11) |
| N1   | C11  | C6   | C5   | -6.29(11)   |
| N1   | C11  | C6   | C7   | 176.70(9)   |
| N1   | C11  | C10  | C9   | -177.45(10) |
| N1   | C1   | C5   | C6   | -1.85(9)    |
| N1   | C1   | C5   | C4   | -118.02(8)  |
| N1   | C1   | C5   | C18  | 117.22(9)   |
| N1   | C1   | C2   | C3   | 80.19(9)    |
| N1   | C1   | C2   | C16  | -45.37(12)  |
| N1   | C1   | C2   | C13  | -176.74(8)  |
| C11  | N1   | C1   | C5   | -1.65(10)   |
| C11  | N1   | C1   | C2   | -115.39(9)  |
| C11  | C6   | C5   | C1   | 4.77(10)    |
| C11  | C6   | C5   | C4   | 114.40(9)   |
| C11  | C6   | C5   | C18  | -116.11(9)  |
| C11  | C6   | C7   | C8   | 1.59(15)    |
| C11  | C10  | C9   | C8   | 0.27(16)    |
| C1   | N1   | C11  | C6   | 4.96(11)    |
| C1   | N1   | C11  | C10  | -176.29(10) |
| C1   | C5   | C4   | C3   | 32.42(9)    |
| C1   | C5   | C4   | C14  | -70.53(10)  |
| C1   | C2   | C13  | C14  | -75.34(10)  |
| C3   | C2   | C13  | C14  | 26.69(10)   |
| C3   | C4   | C14  | C13  | -39.22(9)   |
| C6   | C11  | C10  | C9   | 1.20(15)    |
| C6   | C5   | C4   | C3   | -76.39(9)   |
| C6   | C5   | C4   | C14  | -179.33(8)  |
| C5   | C1   | C2   | C3   | -34.68(9)   |
| C5   | C1   | C2   | C16  | -160.23(8)  |
| C5   | C1   | C2   | C13  | 68.40(9)    |
| C5   | C6   | C7   | C8   | -174.77(10) |
| C5   | C4   | C14  | C13  | 64.55(10)   |
| C16  | C2   | C13  | C14  | 152.85(9)   |
| C10  | C11  | C6   | C5   | 174.87(9)   |
| C10  | C11  | C6   | C7   | -2.15(15)   |
| C2   | C1   | C5   | C6   | 117.65(8)   |
| C2   | C1   | C5   | C4   | 1.49(9)     |
| C2   | C1   | C5   | C18  | -123.28(9)  |
| C2   | C3   | C4   | C5   | -55.64(8)   |
| C2   | C3   | C4   | C14  | 57.03(9)    |
| C2   | C13  | C14  | C4   | 7.80(10)    |
| C17  | N1   | C11  | C6   | 147.48(9)   |
| C17  | N1   | C11  | C10  | -33.78(15)  |
| C17  | N1   | C1   | C5   | -145.16(9)  |
| C17  | N1   | C1   | C2   | 101.10(10)  |
| C9   | C8   | C7   | C6   | -0.13(16)   |

**The Rigaku Synergy S Diffractometer was purchased with Support from the MRI program by the National Science Foundation under Grant No. 1919565.**

| Atom | Atom | Atom | Atom | Angle/°     |
|------|------|------|------|-------------|
| C7   | C6   | C5   | C1   | -178.57(10) |
| C7   | C6   | C5   | C4   | -68.94(13)  |
| C7   | C6   | C5   | C18  | 60.56(14)   |
| C7   | C8   | C9   | C10  | -0.81(16)   |
| C4   | C3   | C2   | C1   | 56.10(8)    |
| C4   | C3   | C2   | C16  | -177.93(8)  |
| C4   | C3   | C2   | C13  | -51.90(9)   |
| C18  | C5   | C4   | C3   | 156.24(9)   |
| C18  | C5   | C4   | C14  | 53.29(12)   |

**Table 12:** Hydrogen Fractional Atomic Coordinates ( $\times 10^4$ ) and Equivalent Isotropic Displacement Parameters ( $\text{\AA}^2 \times 10^3$ ) for **JW722B**.  $U_{eq}$  is defined as 1/3 of the trace of the orthogonalised  $U_{ij}$ .

| Atom | x       | y        | z       | $U_{eq}$ |
|------|---------|----------|---------|----------|
| H1   | 2191.79 | 3435.55  | 7252.48 | 22       |
| H16A | 990.25  | 3503.11  | 8466.66 | 38       |
| H16B | 502.32  | 5783.9   | 8443.83 | 38       |
| H16C | 1509.11 | 5539.01  | 9087.71 | 38       |
| H10  | 4493.3  | 6692.47  | 9710.75 | 28       |
| H17A | 3564.19 | 2419.58  | 8824.25 | 39       |
| H17B | 2677.52 | 2514.87  | 9126.12 | 39       |
| H17C | 3522.35 | 3806.01  | 9790.85 | 39       |
| H8   | 4912.09 | 11024.29 | 7673.92 | 31       |
| H9   | 5351.31 | 9376.64  | 9266.65 | 31       |
| H13A | 55.89   | 5344.81  | 6527.77 | 30       |
| H13B | 764.01  | 3766.31  | 6274.61 | 30       |
| H7   | 3597.39 | 9941.75  | 6469.26 | 28       |
| H4   | 1780.28 | 9629.83  | 6163.87 | 26       |
| H14A | 940.36  | 6324.69  | 5161.49 | 32       |
| H14B | 340.7   | 8033.04  | 5538.83 | 32       |
| H18A | 3129.5  | 4442.15  | 6062.76 | 40       |
| H18B | 2748.21 | 6490.16  | 5349.73 | 40       |
| H18C | 2110.93 | 4558.02  | 5451.77 | 40       |

## Citations

**CrysAlisPro** (Rigaku, V1.171.42.60a, 2022)

CrysAlisPro (ROD), Rigaku Oxford Diffraction, Poland (?).

O.V. Dolomanov and L.J. Bourhis and R.J. Gildea and J.A.K. Howard and H. Puschmann, Olex2: A complete structure solution, refinement and analysis program, *J. Appl. Cryst.*, (2009), **42**, 339-341.

Sheldrick, G.M., Crystal structure refinement with ShelXL, *Acta Cryst.*, (2015), **C71**, 3-8.

Sheldrick, G.M., ShelXT-Integrated space-group and crystal-structure determination, *Acta Cryst.*, (2015), **A71**, 3-8.

**The Rigaku Synergy S Diffractometer was purchased with Support from the MRI program by the National Science Foundation under Grant No. 1919565.**

# Compound 15b

Submitted by: **Jimmy Wu**

Date Collected: **6-14-2022**

Solved by: **Richard J Staples**

Sample ID: **ZTP-3-187**

Crystal structure from crystals provided.

## Crystal Data and Experimental



Center Crystallographic for Research  
Michigan State University  
Department of Chemistry  
East Lansing, MI 48824  
**Dr. Richard J. Staples**  
staples@chemistry.msu.edu

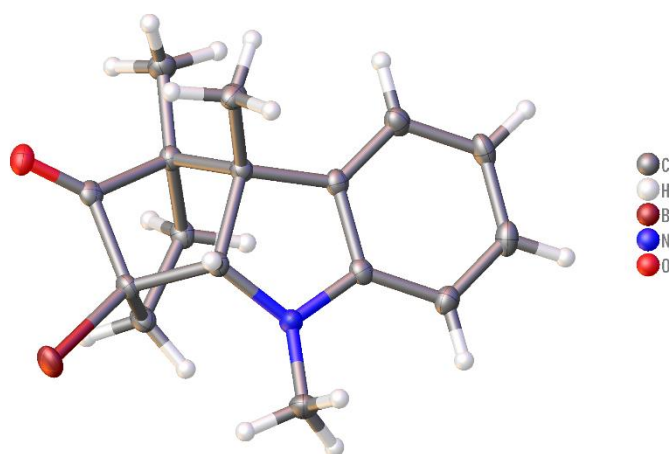

**Experimental.** Single colourless irregular-shaped crystals of **JW622A** used as received. A suitable crystal with dimensions  $0.18 \times 0.15 \times 0.12 \text{ mm}^3$  was selected and mounted on a nylon loop with paratone oil on a XtaLAB Synergy, Dualflex, HyPix diffractometer. The crystal was kept at a steady  $T = 100.01(10) \text{ K}$  during data collection. The structure was solved with the **ShelXS** (Sheldrick, 2008) solution program using direct methods and by using **Olex2** 1.5 (Dolomanov et al., 2009) as the graphical interface. The model was refined with **ShelXL** 2018/3 (Sheldrick, 2015) using full matrix least squares minimisation on  $F^2$ .

**Crystal Data.**  $\text{C}_{16}\text{H}_{18}\text{BrNO}$ ,  $M_r = 320.22$ , monoclinic,  $P2_1/n$  (No. 14),  $a = 8.88043(12) \text{ \AA}$ ,  $b = 10.96832(16) \text{ \AA}$ ,  $c = 14.65499(19) \text{ \AA}$ ,  $\beta = 101.3867(13)^\circ$ ,  $\alpha = \gamma = 90^\circ$ ,  $V = 1399.35(3) \text{ \AA}^3$ ,  $T = 100.01(10) \text{ K}$ ,  $Z = 4$ ,  $Z' = 1$ ,  $\mu(\text{Cu K}\alpha) = 3.924$ , 17600 reflections measured, 2868 unique ( $R_{\text{int}} = 0.0331$ ) which were used in all calculations. The final  $wR_2$  was 0.0580 (all data) and  $R_1$  was 0.0227 ( $I \geq 2 \sigma(I)$ ).

| Compound                              | JW622A                                  |
|---------------------------------------|-----------------------------------------|
| Formula                               | $\text{C}_{16}\text{H}_{18}\text{BrNO}$ |
| $D_{\text{calc.}} / \text{g cm}^{-3}$ | 1.520                                   |
| $\mu / \text{mm}^{-1}$                | 3.924                                   |
| Formula Weight                        | 320.22                                  |
| Color                                 | colourless                              |
| Shape                                 | irregular-shaped                        |
| Size/ $\text{mm}^3$                   | $0.18 \times 0.15 \times 0.12$          |
| $T / \text{K}$                        | 100.01(10)                              |
| Crystal System                        | monoclinic                              |
| Space Group                           | $P2_1/n$                                |
| $a / \text{ \AA}$                     | 8.88043(12)                             |
| $b / \text{ \AA}$                     | 10.96832(16)                            |
| $c / \text{ \AA}$                     | 14.65499(19)                            |
| $\alpha / ^\circ$                     | 90                                      |
| $\beta / ^\circ$                      | 101.3867(13)                            |
| $\gamma / ^\circ$                     | 90                                      |
| $V / \text{ \AA}^3$                   | 1399.35(3)                              |
| $Z$                                   | 4                                       |
| $Z'$                                  | 1                                       |
| Wavelength/ $\text{ \AA}$             | 1.54184                                 |
| Radiation type                        | Cu $K\alpha$                            |
| $\theta_{\text{min}} / ^\circ$        | 5.073                                   |
| $\theta_{\text{max}} / ^\circ$        | 76.789                                  |
| Measured Refl's.                      | 17600                                   |
| Indep't Refl's                        | 2868                                    |
| Refl's $I \geq 2 \sigma(I)$           | 2750                                    |
| $R_{\text{int}}$                      | 0.0331                                  |
| Parameters                            | 175                                     |
| Restraints                            | 0                                       |
| Largest Peak                          | 0.298                                   |
| Deepest Hole                          | -0.415                                  |
| Goof                                  | 1.062                                   |
| $wR_2$ (all data)                     | 0.0580                                  |
| $wR_2$                                | 0.0575                                  |
| $R_1$ (all data)                      | 0.0236                                  |
| $R_1$                                 | 0.0227                                  |

**The Rigaku Synergy S Diffractometer was purchased with Support from the MRI program by the National Science Foundation under Grant No. 1919565.**



## Structure Quality Indicators

|              |                                         |        |                 |      |          |       |                              |       |
|--------------|-----------------------------------------|--------|-----------------|------|----------|-------|------------------------------|-------|
| Reflections: | d min (Cu\lambda)<br>2 $\theta$ =154.2° | 0.79   | I/ $\sigma$ (I) | 51.1 | Rint     | 3.31% | Full 135.4°<br>97% to 154.2° | 100   |
| Refinement:  | Shift                                   | -0.001 | Max Peak        | 0.3  | Min Peak | -0.4  | Goof                         | 1.062 |

A colourless irregular-shaped crystal with dimensions 0.18×0.15×0.12 mm<sup>3</sup> was mounted on a nylon loop with paratone oil. Data were collected using a XtaLAB Synergy, Dualflex, HyPix diffractometer equipped with an Oxford Cryosystems low-temperature device, operating at  $T = 100.01(10)$  K.

MSU Data were measured using  $\omega$  scans using Cu K $\alpha$  radiation (micro-focus sealed X-ray tube, 50 kV, 1 mA). The total number of runs and images was based on the strategy calculation from the program CrysAlisPro 1.171.42.58a (Rigaku OD, 2022). The achieved resolution was  $\theta = 76.789$ .

Cell parameters were retrieved using the CrysAlisPro 1.171.42.58a (Rigaku OD, 2022) software and refined using CrysAlisPro 1.171.42.58a (Rigaku OD, 2022) on 12002 reflections, 68 % of the observed reflections. Data reduction was performed using the CrysAlisPro 1.171.42.58a (Rigaku OD, 2022) software which corrects for Lorentz polarization. The final completeness is 100.00 out to 76.789 in  $\theta$  CrysAlisPro 1.171.42.58a (Rigaku Oxford Diffraction, 2022) Empirical absorption correction using spherical harmonics, implemented in SCALE3 ABSPACK scaling algorithm.

The structure was solved in the space group  $P2_1/n$  (# 14) by using direct methods using the ShelXS (Sheldrick, 2008) structure solution program. The structure was refined by Least Squares ShelXL incorporated in Olex2 software program. All non-hydrogen atoms were refined anisotropically. Hydrogen atom positions were calculated geometrically and refined using the riding model, except for the hydrogen atom on the non-carbon atom(s) which were found by difference Fourier methods and refined isotropically when data permits.

There is a single molecule in the asymmetric unit, which is represented by the reported sum formula. In other words: Z is 4 and Z' is 1.

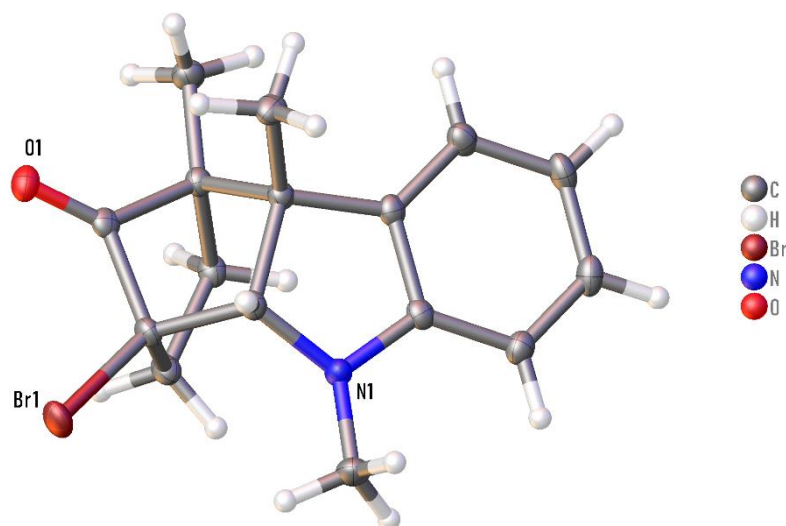

Figure 6:

**The Rigaku Synergy S Diffractometer was purchased with Support from the MRI program by the National Science Foundation under Grant No. 1919565.**

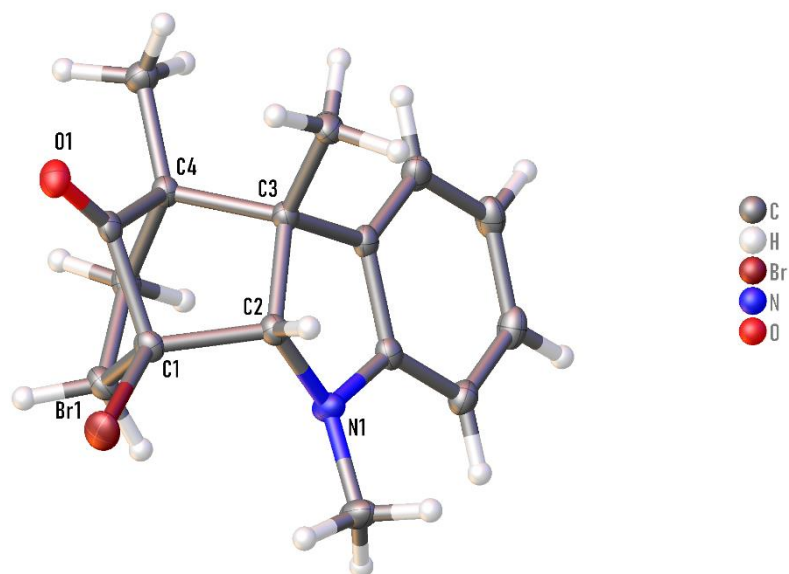

**Figure 7:** Model has Chirality at C1 (Centro SPGR) R Verify, Model has Chirality at C2 (Centro SPGR) S Verify, Model has Chirality at C3 (Centro SPGR) S Verify, Model has Chirality at C4 (Centro SPGR) R Verify. Due to Centrosymmetric space group the other diastereomer is present in the crystal lattice.

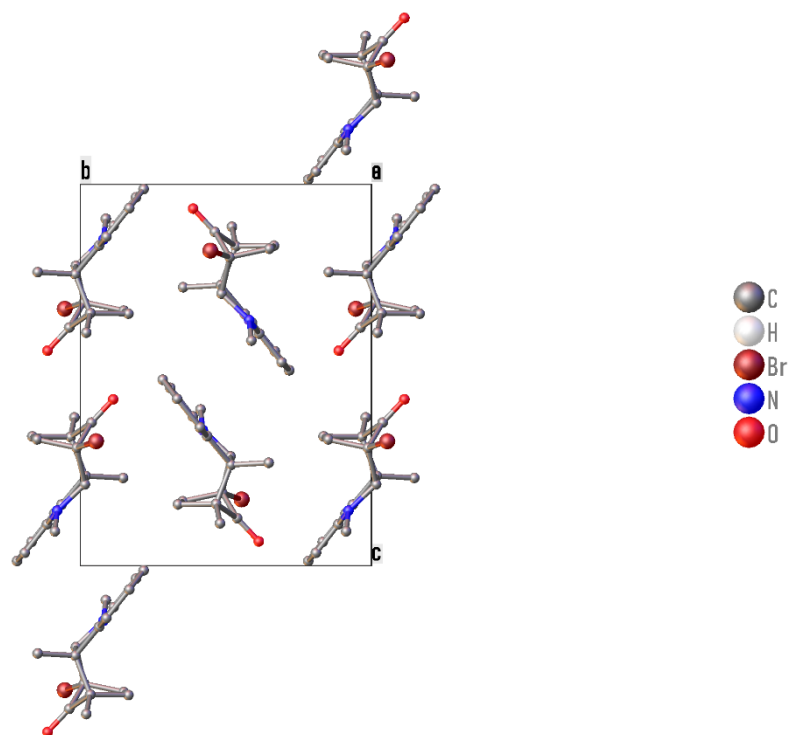

**Figure 8:** Packing diagram of JW622A.

The Rigaku Synergy S Diffractometer was purchased with Support from the MRI program by the National Science Foundation under Grant No. 1919565.

## Data Plots: Diffraction Data

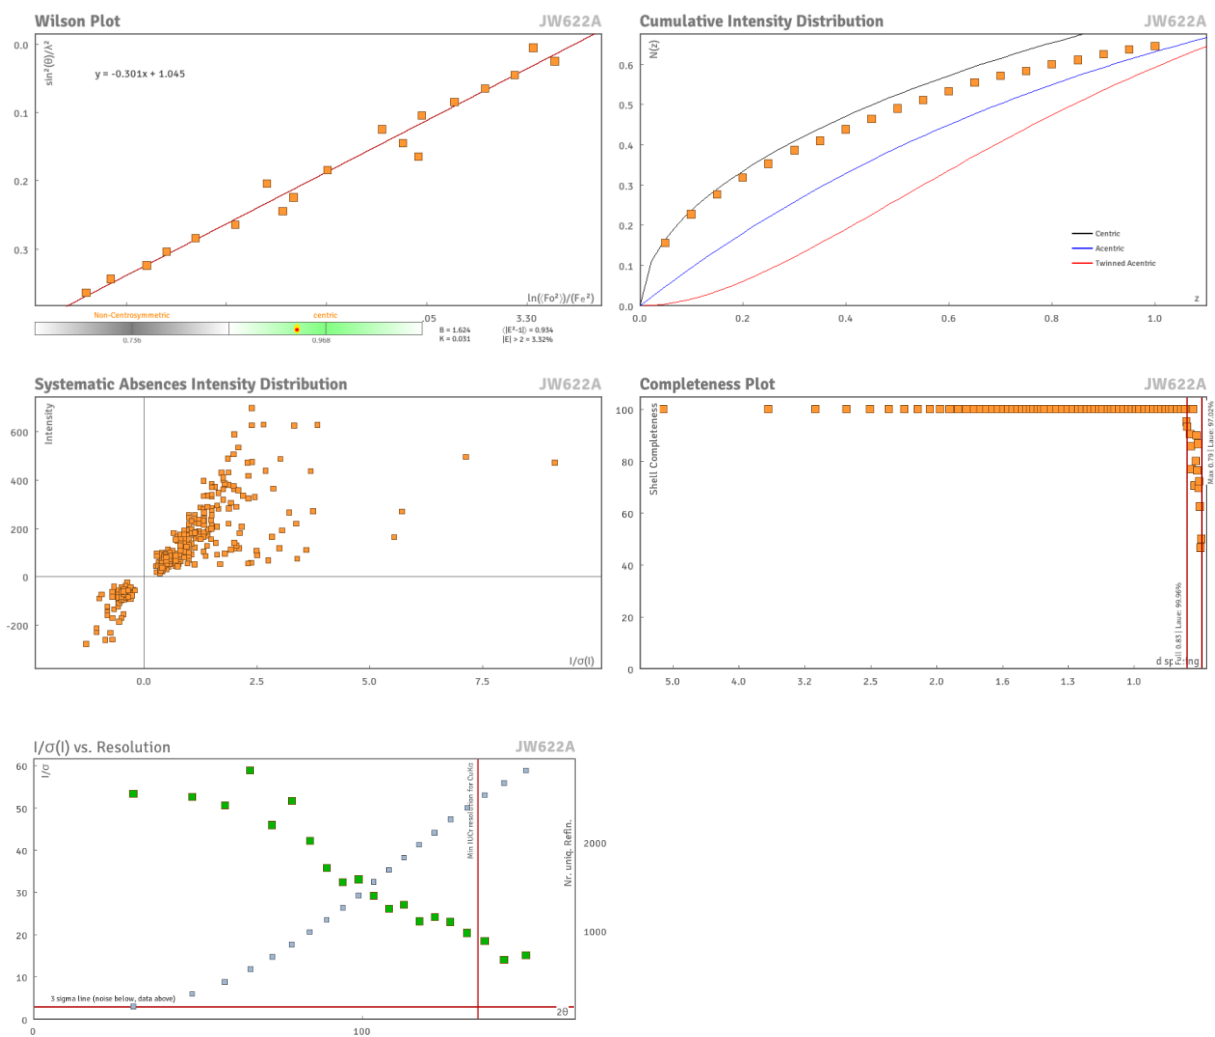

## Data Plots: Refinement and Data

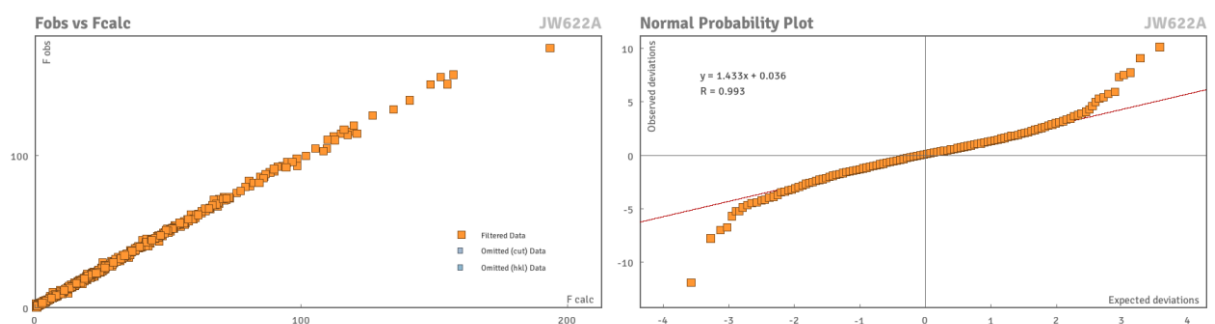

## Reflection Statistics

|                                     |              |                          |                 |
|-------------------------------------|--------------|--------------------------|-----------------|
| Total reflections (after filtering) | 18221        | Unique reflections       | 2868            |
| Completeness                        | 0.97         | Mean $I/\sigma$          | 34.49           |
| $hkl_{\max}$ collected              | (10, 13, 18) | $hkl_{\min}$ collected   | (-11, -13, -14) |
| $hkl_{\max}$ used                   | (10, 13, 18) | $hkl_{\min}$ used        | (-11, 0, 0)     |
| Lim $d_{\max}$ collected            | 100.0        | Lim $d_{\min}$ collected | 0.77            |

The Rigaku Synergy S Diffractometer was purchased with Support from the MRI program by the National Science Foundation under Grant No. 1919565.

|                             |                                                              |                            |        |
|-----------------------------|--------------------------------------------------------------|----------------------------|--------|
| d <sub>max</sub> used       | 14.37                                                        | d <sub>min</sub> used      | 0.79   |
| Friedel pairs               | 1260                                                         | Friedel pairs merged       | 1      |
| Inconsistent equivalents    | 0                                                            | R <sub>int</sub>           | 0.0331 |
| R <sub>sigma</sub>          | 0.0196                                                       | Intensity transformed      | 0      |
| Omitted reflections         | 0                                                            | Omitted by user (OMIT hkl) | 0      |
| Multiplicity                | (2451, 1568, 977, 714, 412,<br>232, 157, 141, 84, 29, 10, 1) | Maximum multiplicity       | 22     |
| Removed systematic absences | 621                                                          | Filtered off (Shel/OMIT)   | 0      |

### Selected Crystal Pictures

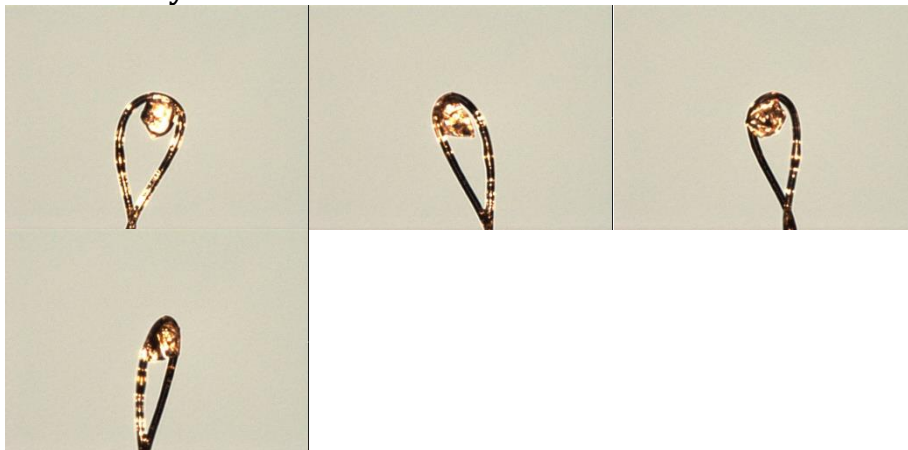

**Table 13:** Fractional Atomic Coordinates ( $\times 10^4$ ) and Equivalent Isotropic Displacement Parameters ( $\text{\AA}^2 \times 10^3$ ) for **JW622A**.  $U_{eq}$  is defined as 1/3 of the trace of the orthogonalised  $U_{ij}$ .

| Atom | x          | y          | z          | $U_{eq}$ |
|------|------------|------------|------------|----------|
| Br1  | 1338.0(2)  | 4461.5(2)  | 8263.1(2)  | 22.37(7) |
| O1   | 4788.4(13) | 3873.7(10) | 9362.9(7)  | 19.6(2)  |
| N1   | 3274.3(15) | 5797.4(13) | 6442.0(9)  | 17.7(3)  |
| C1   | 3273.6(17) | 5129.5(14) | 8091.6(10) | 16.0(3)  |
| C2   | 3692.1(17) | 4846.0(14) | 7134.5(10) | 15.2(3)  |
| C3   | 5508.9(17) | 4824.9(14) | 7355.1(10) | 14.5(3)  |
| C4   | 5913.1(18) | 5338.9(14) | 8377.8(10) | 14.8(3)  |
| C5   | 5255.2(18) | 6649.8(14) | 8392.4(11) | 17.0(3)  |
| C6   | 3487.8(18) | 6487.2(14) | 8311.7(11) | 18.4(3)  |
| C7   | 4691.2(18) | 4617.4(14) | 8755.1(10) | 15.0(3)  |
| C8   | 5896.9(18) | 5643.1(14) | 6603.8(10) | 15.2(3)  |
| C9   | 4541.7(17) | 6142.5(14) | 6086.9(10) | 15.6(3)  |
| C10  | 4581.3(18) | 6911.2(15) | 5337.5(10) | 18.6(3)  |
| C11  | 6006.2(19) | 7173.8(15) | 5123.4(11) | 20.9(3)  |
| C12  | 7349.8(19) | 6677.4(16) | 5624.5(11) | 21.4(3)  |
| C13  | 7298.2(18) | 5892.3(16) | 6372.6(11) | 19.4(3)  |
| C14  | 6135.8(19) | 3532.4(15) | 7301.2(11) | 19.2(3)  |
| C15  | 7557.9(18) | 5203.0(16) | 8888.2(11) | 20.3(3)  |
| C16  | 1722.5(18) | 5874.1(17) | 5902.0(12) | 23.0(3)  |

**Table 14:** Anisotropic Displacement Parameters ( $\times 10^4$ ) for **JW622A**. The anisotropic displacement factor exponent takes the form:  $-2\pi^2[h^2a^{*2} \times U_{11} + \dots + 2hka^* \times b^* \times U_{12}]$

| Atom | $U_{11}$  | $U_{22}$  | $U_{33}$  | $U_{23}$ | $U_{13}$ | $U_{12}$ |
|------|-----------|-----------|-----------|----------|----------|----------|
| Br1  | 16.94(10) | 30.12(12) | 21.98(11) | 1.25(6)  | 8.53(7)  | -5.43(6) |

**The Rigaku Synergy S Diffractometer was purchased with Support from the MRI program by the National Science Foundation under Grant No. 1919565.**

| Atom | $U_{11}$ | $U_{22}$ | $U_{33}$ | $U_{23}$ | $U_{13}$ | $U_{12}$ |
|------|----------|----------|----------|----------|----------|----------|
| O1   | 25.9(6)  | 17.6(6)  | 16.2(5)  | 1.4(4)   | 6.4(4)   | 0.1(4)   |
| N1   | 13.8(6)  | 23.3(7)  | 16.3(6)  | 4.9(5)   | 3.6(5)   | 1.5(5)   |
| C1   | 14.1(7)  | 17.9(7)  | 17.2(7)  | 0.4(6)   | 6.4(6)   | -1.5(6)  |
| C2   | 15.9(7)  | 15.5(7)  | 14.8(7)  | -0.1(6)  | 4.9(5)   | -0.2(6)  |
| C3   | 14.4(7)  | 16.1(7)  | 13.3(7)  | -1.0(5)  | 3.4(5)   | 0.3(6)   |
| C4   | 15.9(7)  | 15.6(7)  | 13.5(7)  | -0.8(5)  | 4.3(6)   | -0.4(6)  |
| C5   | 20.2(7)  | 15.0(7)  | 16.8(7)  | -1.8(6)  | 6.1(6)   | -1.8(6)  |
| C6   | 19.6(8)  | 17.4(8)  | 20.0(7)  | -0.5(6)  | 7.9(6)   | 1.8(6)   |
| C7   | 18.3(7)  | 14.4(7)  | 13.2(7)  | -3.9(5)  | 4.9(6)   | 0.8(6)   |
| C8   | 17.6(7)  | 16.2(7)  | 12.5(7)  | -2.5(5)  | 4.2(6)   | -1.5(6)  |
| C9   | 17.1(7)  | 15.9(7)  | 14.9(7)  | -2.7(5)  | 5.4(6)   | -0.7(6)  |
| C10  | 22.3(8)  | 19.1(8)  | 14.2(7)  | 0.4(6)   | 3.3(6)   | 0.3(6)   |
| C11  | 28.0(8)  | 20.6(8)  | 15.2(7)  | -0.1(6)  | 6.7(6)   | -6.4(7)  |
| C12  | 21.3(8)  | 26.6(9)  | 18.4(7)  | -2.8(6)  | 9.1(6)   | -7.6(6)  |
| C13  | 17.2(7)  | 25.2(8)  | 16.1(7)  | -2.4(6)  | 3.8(6)   | -2.2(6)  |
| C14  | 22.5(8)  | 18.8(8)  | 16.6(7)  | -0.9(6)  | 4.5(6)   | 4.9(6)   |
| C15  | 17.0(8)  | 25.1(8)  | 18.1(7)  | 0.3(6)   | 1.7(6)   | 0.4(6)   |
| C16  | 14.8(7)  | 31.7(9)  | 22.0(8)  | 4.9(7)   | 2.2(6)   | 3.6(7)   |

**Table 15:** Bond Lengths in Å for JW622A.

| Atom | Atom | Length/Å   | Atom | Atom | Length/Å |
|------|------|------------|------|------|----------|
| Br1  | C1   | 1.9301(15) | C3   | C14  | 1.531(2) |
| O1   | C7   | 1.1983(19) | C4   | C5   | 1.554(2) |
| N1   | C2   | 1.452(2)   | C4   | C7   | 1.532(2) |
| N1   | C9   | 1.383(2)   | C4   | C15  | 1.511(2) |
| N1   | C16  | 1.450(2)   | C5   | C6   | 1.561(2) |
| C1   | C2   | 1.552(2)   | C8   | C9   | 1.401(2) |
| C1   | C6   | 1.528(2)   | C8   | C13  | 1.380(2) |
| C1   | C7   | 1.537(2)   | C9   | C10  | 1.390(2) |
| C2   | C3   | 1.582(2)   | C10  | C11  | 1.393(2) |
| C3   | C4   | 1.575(2)   | C11  | C12  | 1.383(2) |
| C3   | C8   | 1.512(2)   | C12  | C13  | 1.402(2) |

**Table 16:** Bond Angles in ° for JW622A.

| Atom | Atom | Atom | Angle/°    | Atom | Atom | Atom | Angle/°    |
|------|------|------|------------|------|------|------|------------|
| C9   | N1   | C2   | 110.19(12) | C8   | C3   | C14  | 112.00(12) |
| C9   | N1   | C16  | 122.36(13) | C14  | C3   | C2   | 111.70(13) |
| C16  | N1   | C2   | 120.49(13) | C14  | C3   | C4   | 111.33(12) |
| C2   | C1   | Br1  | 114.83(10) | C5   | C4   | C3   | 109.19(12) |
| C6   | C1   | Br1  | 114.81(10) | C7   | C4   | C3   | 96.54(11)  |
| C6   | C1   | C2   | 110.13(12) | C7   | C4   | C5   | 100.25(12) |
| C6   | C1   | C7   | 99.81(12)  | C15  | C4   | C3   | 116.88(13) |
| C7   | C1   | Br1  | 114.72(10) | C15  | C4   | C5   | 114.45(13) |
| C7   | C1   | C2   | 100.73(12) | C15  | C4   | C7   | 117.04(13) |
| N1   | C2   | C1   | 114.46(13) | C4   | C5   | C6   | 105.58(12) |
| N1   | C2   | C3   | 105.25(12) | C1   | C6   | C5   | 102.05(12) |
| C1   | C2   | C3   | 103.58(12) | O1   | C7   | C1   | 130.45(14) |
| C4   | C3   | C2   | 102.76(11) | O1   | C7   | C4   | 131.90(15) |
| C8   | C3   | C2   | 102.26(12) | C4   | C7   | C1   | 97.64(12)  |
| C8   | C3   | C4   | 116.01(12) | C9   | C8   | C3   | 109.33(13) |

**The Rigaku Synergy S Diffractometer was purchased with Support from the MRI program by the National Science Foundation under Grant No. 1919565.**

| Atom | Atom | Atom | Angle/°    | Atom | Atom | Atom | Angle/°    |
|------|------|------|------------|------|------|------|------------|
| C13  | C8   | C3   | 129.98(14) | C9   | C10  | C11  | 117.98(15) |
| C13  | C8   | C9   | 120.65(14) | C12  | C11  | C10  | 121.73(15) |
| N1   | C9   | C8   | 111.44(13) | C11  | C12  | C13  | 119.93(15) |
| N1   | C9   | C10  | 127.78(14) | C8   | C13  | C12  | 118.94(15) |
| C10  | C9   | C8   | 120.75(14) |      |      |      |            |

**Table 17:** Torsion Angles in ° for **JW622A**.

| Atom | Atom | Atom | Atom | Angle/°     |
|------|------|------|------|-------------|
| Br1  | C1   | C2   | N1   | 95.47(14)   |
| Br1  | C1   | C2   | C3   | -150.51(10) |
| Br1  | C1   | C6   | C5   | 164.16(10)  |
| Br1  | C1   | C7   | O1   | -0.2(2)     |
| Br1  | C1   | C7   | C4   | 178.75(10)  |
| N1   | C2   | C3   | C4   | 110.44(13)  |
| N1   | C2   | C3   | C8   | -10.19(15)  |
| N1   | C2   | C3   | C14  | -130.12(13) |
| N1   | C9   | C10  | C11  | 177.41(15)  |
| C1   | C2   | C3   | C4   | -10.05(15)  |
| C1   | C2   | C3   | C8   | -130.67(12) |
| C1   | C2   | C3   | C14  | 109.39(13)  |
| C2   | N1   | C9   | C8   | -10.48(18)  |
| C2   | N1   | C9   | C10  | 171.49(15)  |
| C2   | C1   | C6   | C5   | -64.37(15)  |
| C2   | C1   | C7   | O1   | -124.15(17) |
| C2   | C1   | C7   | C4   | 54.85(13)   |
| C2   | C3   | C4   | C5   | -60.43(14)  |
| C2   | C3   | C4   | C7   | 42.84(13)   |
| C2   | C3   | C4   | C15  | 167.68(13)  |
| C2   | C3   | C8   | C9   | 4.54(15)    |
| C2   | C3   | C8   | C13  | -173.02(16) |
| C3   | C4   | C5   | C6   | 74.83(14)   |
| C3   | C4   | C7   | O1   | 118.87(17)  |
| C3   | C4   | C7   | C1   | -60.11(12)  |
| C3   | C8   | C9   | N1   | 3.20(18)    |
| C3   | C8   | C9   | C10  | -178.62(14) |
| C3   | C8   | C13  | C12  | 178.80(15)  |
| C4   | C3   | C8   | C9   | -106.41(15) |
| C4   | C3   | C8   | C13  | 76.0(2)     |
| C4   | C5   | C6   | C1   | -9.33(15)   |
| C5   | C4   | C7   | O1   | -130.22(17) |
| C5   | C4   | C7   | C1   | 50.80(13)   |
| C6   | C1   | C2   | N1   | -35.99(17)  |
| C6   | C1   | C2   | C3   | 78.04(15)   |
| C6   | C1   | C7   | O1   | 123.00(17)  |
| C6   | C1   | C7   | C4   | -58.00(13)  |
| C7   | C1   | C2   | N1   | -140.71(13) |
| C7   | C1   | C2   | C3   | -26.68(14)  |
| C7   | C1   | C6   | C5   | 40.98(14)   |
| C7   | C4   | C5   | C6   | -25.87(14)  |
| C8   | C3   | C4   | C5   | 50.23(17)   |
| C8   | C3   | C4   | C7   | 153.50(13)  |
| C8   | C3   | C4   | C15  | -81.66(17)  |
| C8   | C9   | C10  | C11  | -0.5(2)     |
| C9   | N1   | C2   | C1   | 125.85(14)  |
| C9   | N1   | C2   | C3   | 12.81(16)   |

**The Rigaku Synergy S Diffractometer was purchased with Support from the MRI program by the National Science Foundation under Grant No. 1919565.**

| Atom | Atom | Atom | Atom | Angle/°     |
|------|------|------|------|-------------|
| C9   | C8   | C13  | C12  | 1.5(2)      |
| C9   | C10  | C11  | C12  | 1.0(2)      |
| C10  | C11  | C12  | C13  | -0.3(2)     |
| C11  | C12  | C13  | C8   | -0.9(2)     |
| C13  | C8   | C9   | N1   | -178.98(14) |
| C13  | C8   | C9   | C10  | -0.8(2)     |
| C14  | C3   | C4   | C5   | 179.87(12)  |
| C14  | C3   | C4   | C7   | -76.85(14)  |
| C14  | C3   | C4   | C15  | 47.98(18)   |
| C14  | C3   | C8   | C9   | 124.27(14)  |
| C14  | C3   | C8   | C13  | -53.3(2)    |
| C15  | C4   | C5   | C6   | -152.01(13) |
| C15  | C4   | C7   | O1   | -5.9(2)     |
| C15  | C4   | C7   | C1   | 175.17(13)  |
| C16  | N1   | C2   | C1   | -82.69(18)  |
| C16  | N1   | C2   | C3   | 164.27(13)  |
| C16  | N1   | C9   | C8   | -161.31(15) |
| C16  | N1   | C9   | C10  | 20.7(3)     |

**Table 18:** Hydrogen Fractional Atomic Coordinates ( $\times 10^4$ ) and Equivalent Isotropic Displacement Parameters ( $\text{\AA}^2 \times 10^3$ ) for **JW622A**.  $U_{eq}$  is defined as 1/3 of the trace of the orthogonalised  $U_{ij}$ .

| Atom | x       | y       | z       | $U_{eq}$ |
|------|---------|---------|---------|----------|
| H2   | 3265.61 | 4039.74 | 6890.41 | 18       |
| H5A  | 5474.44 | 7133.24 | 7863.21 | 20       |
| H5B  | 5711.85 | 7070.04 | 8979.73 | 20       |
| H6A  | 3169.37 | 6695.08 | 8903.17 | 22       |
| H6B  | 2901.97 | 6994.47 | 7804.46 | 22       |
| H10  | 3664.19 | 7247.14 | 4982.43 | 22       |
| H11  | 6056.72 | 7707.77 | 4619.92 | 25       |
| H12  | 8306.55 | 6868.29 | 5461.8  | 26       |
| H13  | 8213.3  | 5537.6  | 6715    | 23       |
| H14A | 5725.38 | 3186.26 | 6685.86 | 29       |
| H14B | 5823.81 | 3023.39 | 7781.24 | 29       |
| H14C | 7259.52 | 3560.22 | 7401.94 | 29       |
| H15A | 7651.6  | 5493.41 | 9529.36 | 30       |
| H15B | 8231.34 | 5684.84 | 8572.39 | 30       |
| H15C | 7857.4  | 4342.69 | 8893.84 | 30       |
| H16A | 1495.21 | 6719.68 | 5706.25 | 35       |
| H16B | 995.45  | 5602.96 | 6283.49 | 35       |
| H16C | 1627.91 | 5351.4  | 5351.25 | 35       |

## Citations

**CrysAlisPro** (Rigaku, V1.171.42.58a, 2022)

CrysAlisPro (ROD), Rigaku Oxford Diffraction, Poland (?).

O.V. Dolomanov and L.J. Bourhis and R.J. Gildea and J.A.K. Howard and H. Puschmann, Olex2: A complete structure solution, refinement and analysis program, *J. Appl. Cryst.*, (2009), **42**, 339-341.

Sheldrick, G.M., A short history of ShelX, *Acta Cryst.*, (2008), **A64**, 339-341.

Sheldrick, G.M., Crystal structure refinement with ShelXL, *Acta Cryst.*, (2015), **C71**, 3-8.

**The Rigaku Synergy S Diffractometer was purchased with Support from the MRI program by the National Science Foundation under Grant No. 1919565.**

# Compound 16b

Submitted by: **Jimmy Wu**

Date Collected: **June 28, 2022**

Solved by: **Richard J Staples**

Sample ID: **ZTP-3-187-minor**

Crystal structure from crystals provided shows the relative stereochemistry.

## Crystal Data and Experimental



Center Crystallographic for Research  
Michigan State University  
Department of Chemistry  
East Lansing, MI 48824  
**Dr. Richard J. Staples**  
staples@chemistry.msu.edu

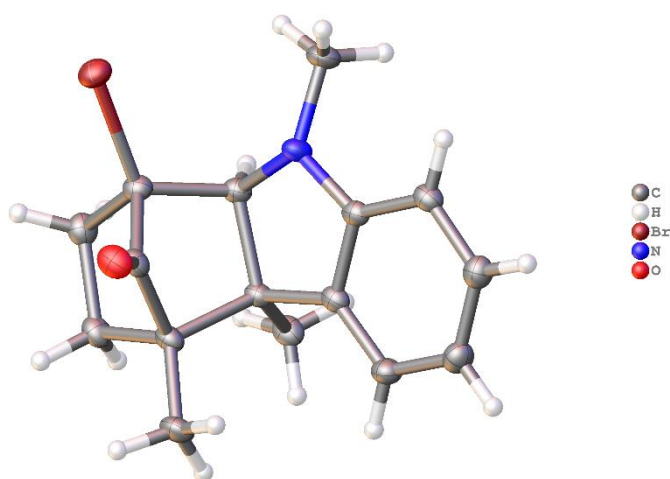

**Experimental.** Single colourless block-shaped crystals of **JW622B** used as received. A suitable crystal with dimensions  $0.35 \times 0.20 \times 0.17 \text{ mm}^3$  was selected and mounted on a nylon loop with paratone oil on a XtaLAB Synergy, Dualflex, HyPix diffractometer. The crystal was kept at a steady  $T = 100.00(10) \text{ K}$  during data collection. The structure was solved with the **ShelXT** (Sheldrick, 2015) solution program using dual methods and by using **Olex2** 1.5 (Dolomanov et al., 2009) as the graphical interface. The model was refined with **ShelXL** 2018/3 (Sheldrick, 2015) using full matrix least squares minimisation on  $F^2$ .

**Crystal Data.**  $\text{C}_{16}\text{H}_{18}\text{BrNO}$ ,  $M_r = 320.22$ , monoclinic,  $P2_1/c$  (No. 14),  $a = 13.68696(11) \text{ \AA}$ ,  $b = 6.65657(6) \text{ \AA}$ ,  $c = 15.48510(13) \text{ \AA}$ ,  $\beta = 101.5354(8)^\circ$ ,  $\alpha = \gamma = 90^\circ$ ,  $V = 1382.32(2) \text{ \AA}^3$ ,  $T = 100.00(10) \text{ K}$ ,  $Z = 4$ ,  $Z' = 1$ ,  $\mu(\text{Cu K}\alpha) = 3.972$ , 19284 reflections measured, 2959 unique ( $R_{\text{int}} = 0.0267$ ) which were used in all calculations. The final  $wR_2$  was 0.0719 (all data) and  $R_1$  was 0.0278 ( $I \geq 2 \sigma(I)$ ).

| Compound                              | JW622B                                  |
|---------------------------------------|-----------------------------------------|
| Formula                               | $\text{C}_{16}\text{H}_{18}\text{BrNO}$ |
| $D_{\text{calc.}} / \text{g cm}^{-3}$ | 1.539                                   |
| $\mu / \text{mm}^{-1}$                | 3.972                                   |
| Formula Weight                        | 320.22                                  |
| Color                                 | colourless                              |
| Shape                                 | block-shaped                            |
| Size/ $\text{mm}^3$                   | $0.35 \times 0.20 \times 0.17$          |
| $T / \text{K}$                        | 100.00(10)                              |
| Crystal System                        | monoclinic                              |
| Space Group                           | $P2_1/c$                                |
| $a / \text{ \AA}$                     | 13.68696(11)                            |
| $b / \text{ \AA}$                     | 6.65657(6)                              |
| $c / \text{ \AA}$                     | 15.48510(13)                            |
| $\alpha / ^\circ$                     | 90                                      |
| $\beta / ^\circ$                      | 101.5354(8)                             |
| $\gamma / ^\circ$                     | 90                                      |
| $V / \text{ \AA}^3$                   | 1382.32(2)                              |
| $Z$                                   | 4                                       |
| $Z'$                                  | 1                                       |
| Wavelength/ $\text{ \AA}$             | 1.54184                                 |
| Radiation type                        | Cu $K\alpha$                            |
| $\theta_{\text{min}} / ^\circ$        | 3.296                                   |
| $\theta_{\text{max}} / ^\circ$        | 80.122                                  |
| Measured Refl's.                      | 19284                                   |
| Indep't Refl's                        | 2959                                    |
| Refl's $I \geq 2 \sigma(I)$           | 2910                                    |
| $R_{\text{int}}$                      | 0.0267                                  |
| Parameters                            | 175                                     |
| Restraints                            | 0                                       |
| Largest Peak                          | 0.556                                   |
| Deepest Hole                          | -0.620                                  |
| GooF                                  | 1.126                                   |
| $wR_2$ (all data)                     | 0.0719                                  |
| $wR_2$                                | 0.0715                                  |
| $R_1$ (all data)                      | 0.0283                                  |
| $R_1$                                 | 0.0278                                  |

**The Rigaku Synergy S Diffractometer was purchased with Support from the MRI program by the National Science Foundation under Grant No. 1919565.**



## Structure Quality Indicators

|                     |                           |              |          |             |          |              |                              |              |
|---------------------|---------------------------|--------------|----------|-------------|----------|--------------|------------------------------|--------------|
| <b>Reflections:</b> | d min (Cu\α)<br>2θ=160.2° | <b>0.78</b>  | I/σ(I)   | <b>68.3</b> | Rint     | <b>2.67%</b> | Full 135.4°<br>98% to 160.2° | <b>100</b>   |
| <b>Refinement:</b>  | Shift                     | <b>0.002</b> | Max Peak | <b>0.6</b>  | Min Peak | <b>-0.6</b>  | Goof                         | <b>1.126</b> |

A colourless block-shaped crystal with dimensions 0.35×0.20×0.17 mm<sup>3</sup> was mounted on a nylon loop with paratone oil. Data were collected using a XtaLAB Synergy, Dualflex, HyPix diffractometer equipped with an Oxford Cryosystems low-temperature device, operating at  $T = 100.00(10)$  K.

MSU Data were measured using  $\omega$  scans using Cu K $\alpha$  radiation (micro-focus sealed X-ray tube, 50 kV, 1 mA). The total number of runs and images was based on the strategy calculation from the program CrysAlisPro 1.171.42.59a (Rigaku OD, 2022). The achieved resolution was  $\theta = 80.122$ .

Cell parameters were retrieved using the CrysAlisPro 1.171.42.59a (Rigaku OD, 2022) software and refined using CrysAlisPro 1.171.42.59a (Rigaku OD, 2022) on 14864 reflections, 77 % of the observed reflections. Data reduction was performed using the CrysAlisPro 1.171.42.59a (Rigaku OD, 2022) software which corrects for Lorentz polarization. The final completeness is 100.00 out to 80.122 in  $\theta$  CrysAlisPro 1.171.42.59a (Rigaku Oxford Diffraction, 2022) Numerical absorption correction based on gaussian integration over a multifaceted crystal model Empirical absorption correction using spherical harmonics, implemented in SCALE3 ABSPACK scaling algorithm.

The structure was solved in the space group  $P2_1/c$  (# 14) by using dual methods using the ShelXT (Sheldrick, 2015) structure solution program. The structure was refined by Least Squares ShelXL incorporated in Olex2 software program. All non-hydrogen atoms were refined anisotropically. Hydrogen atom positions were calculated geometrically and refined using the riding model, except for the hydrogen atom on the non-carbon atom(s) which were found by difference Fourier methods and refined isotropically when data permits.

There is a single molecule in the asymmetric unit, which is represented by the reported sum formula. In other words: Z is 4 and Z' is 1.

**The Rigaku Synergy S Diffractometer was purchased with Support from the MRI program by the National Science Foundation under Grant No. 1919565.**

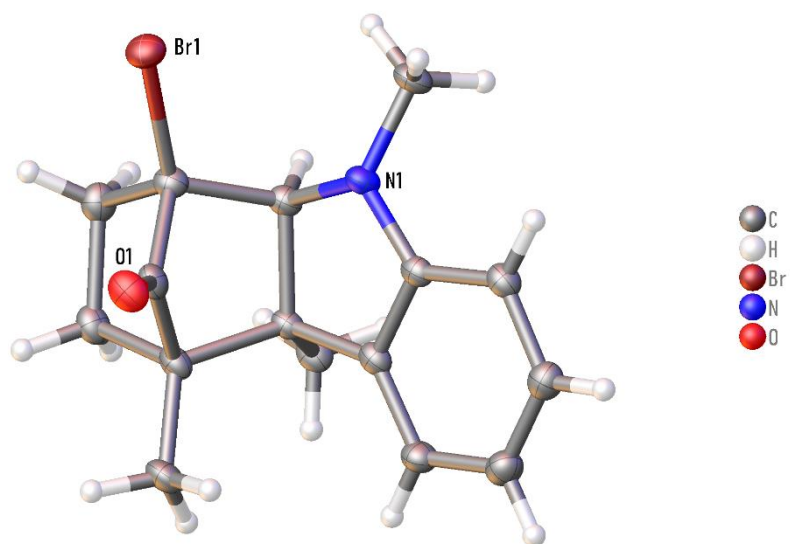

**Figure 9:** drawing at 50% ellipsoid showing heter-atom labeling scheme.

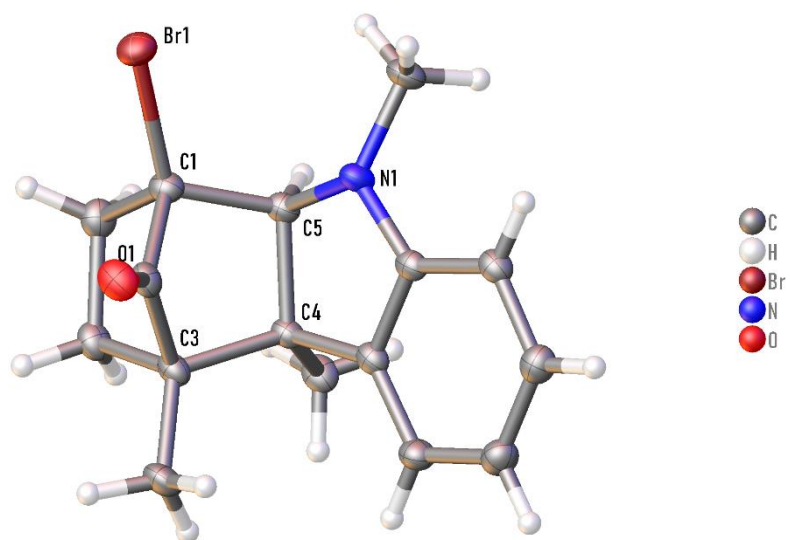

**Figure 10:** Drawing showing relative stereo chemistry, This enantiomer shown has all chiral centers as S.

**The Rigaku Synergy S Diffractometer was purchased with Support from the MRI program by the National Science Foundation under Grant No. 1919565.**

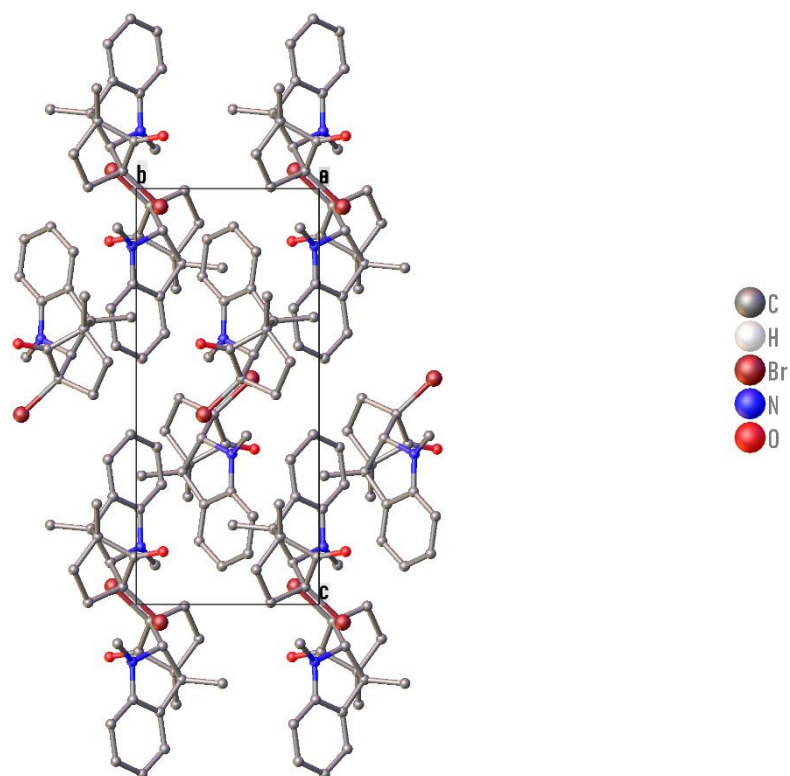

**Figure 11:** Packing diagram of JW622B.

**Data Plots: Diffraction Data**

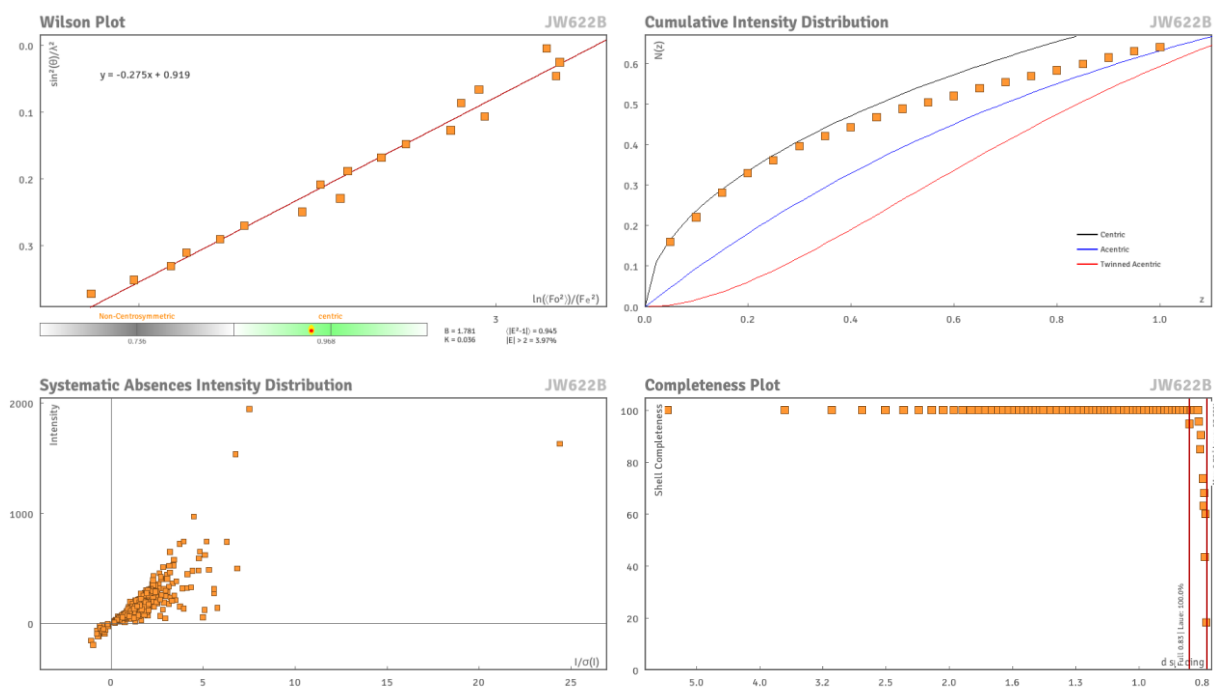

**The Rigaku Synergy S Diffractometer was purchased with Support from the MRI program by the National Science Foundation under Grant No. 1919565.**

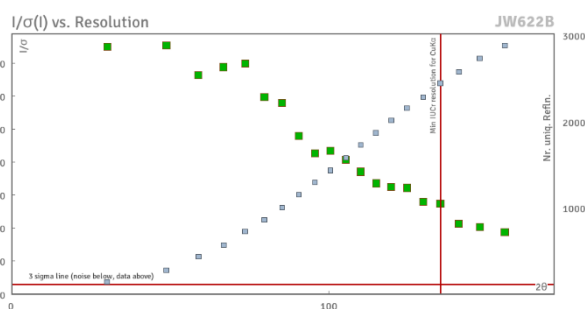

## Data Plots: Refinement and Data

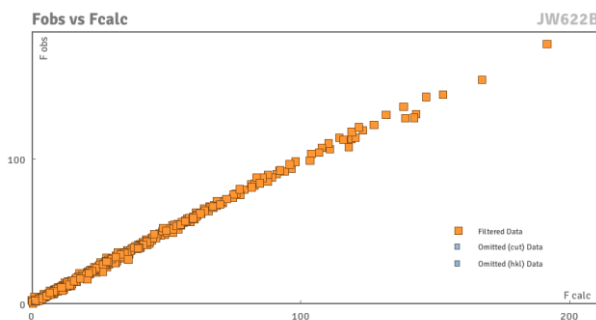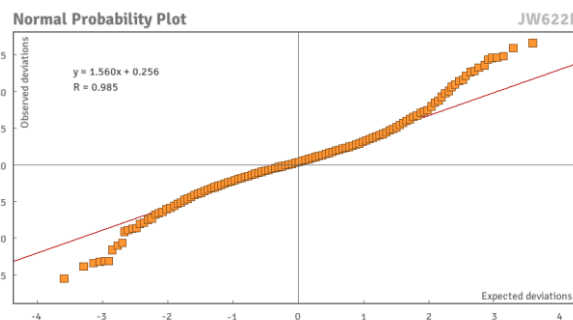

## Reflection Statistics

|                                     |                                               |                            |                |
|-------------------------------------|-----------------------------------------------|----------------------------|----------------|
| Total reflections (after filtering) | 20452                                         | Unique reflections         | 2959           |
| Completeness                        | 0.977                                         | Mean $I/\sigma$            | 45.42          |
| $hkl_{\max}$ collected              | (17, 8, 19)                                   | $hkl_{\min}$ collected     | (-17, -5, -19) |
| $hkl_{\max}$ used                   | (17, 8, 19)                                   | $hkl_{\min}$ used          | (-17, 0, 0)    |
| Lim $d_{\max}$ collected            | 100.0                                         | Lim $d_{\min}$ collected   | 0.77           |
| $d_{\max}$ used                     | 15.17                                         | $d_{\min}$ used            | 0.78           |
| Friedel pairs                       | 2917                                          | Friedel pairs merged       | 1              |
| Inconsistent equivalents            | 3                                             | $R_{\text{int}}$           | 0.0267         |
| $R_{\text{sigma}}$                  | 0.0146                                        | Intensity transformed      | 0              |
| Omitted reflections                 | 0                                             | Omitted by user (OMIT hkl) | 0              |
| Multiplicity                        | (2908, 2200, 1459, 850, 490, 267, 134, 37, 9) | Maximum multiplicity       | 21             |
| Removed systematic absences         | 1168                                          | Filtered off (Shel/OMIT)   | 0              |

## Selected Crystal Pictures

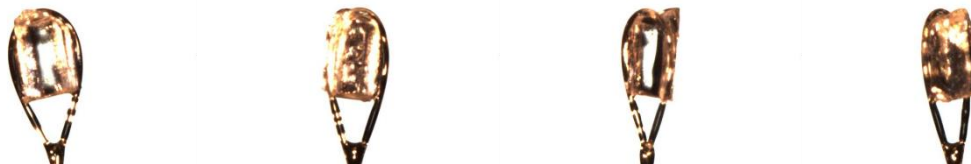

**Table 19:** Fractional Atomic Coordinates ( $\times 10^4$ ) and Equivalent Isotropic Displacement Parameters ( $\text{\AA}^2 \times 10^3$ ) for **JW622B**.  $U_{eq}$  is defined as 1/3 of the trace of the orthogonalised  $U_{ij}$ .

| Atom | x         | y         | z         | $U_{eq}$ |
|------|-----------|-----------|-----------|----------|
| Br1  | 8020.1(2) | 6302.6(3) | 5434.7(2) | 23.90(8) |

The Rigaku Synergy S Diffractometer was purchased with Support from the MRI program by the National Science Foundation under Grant No. 1919565.

| Atom | x          | y       | z          | $U_{eq}$ |
|------|------------|---------|------------|----------|
| O1   | 9066.7(10) | 6468(2) | 3732.6(10) | 24.4(3)  |
| N1   | 6495.8(11) | 5230(2) | 3616.3(10) | 18.9(3)  |
| C1   | 8132.6(14) | 4247(3) | 4576.9(12) | 18.5(3)  |
| C2   | 8700.0(13) | 4883(3) | 3860.0(12) | 18.3(4)  |
| C3   | 8654.8(13) | 2884(3) | 3375.8(12) | 18.3(4)  |
| C4   | 7495.5(13) | 2515(3) | 3187.0(12) | 16.4(3)  |
| C5   | 7139.9(13) | 3572(3) | 3995.1(12) | 17.2(4)  |
| C6   | 8711.3(14) | 2357(3) | 4956.7(13) | 22.4(4)  |
| C7   | 9152.3(14) | 1569(3) | 4167.5(13) | 22.0(4)  |
| C8   | 6344.9(12) | 5184(3) | 2706.3(12) | 16.6(3)  |
| C9   | 6931.2(13) | 3717(3) | 2410.1(13) | 17.3(4)  |
| C10  | 6882.0(14) | 3449(3) | 1518.7(13) | 21.5(4)  |
| C11  | 6255.7(15) | 4689(3) | 918.2(13)  | 24.2(4)  |
| C12  | 5674.5(15) | 6123(3) | 1219.0(13) | 22.9(4)  |
| C13  | 5693.7(14) | 6390(3) | 2116.3(13) | 19.2(4)  |
| C14  | 9165.0(14) | 2828(3) | 2592.7(14) | 24.0(4)  |
| C15  | 7203.7(14) | 291(3)  | 3093.4(13) | 21.7(4)  |
| C16  | 5730.4(14) | 6029(3) | 4052.6(13) | 22.7(4)  |

**Table 20:** Anisotropic Displacement Parameters ( $\times 10^4$ ) for **JW622B**. The anisotropic displacement factor exponent takes the form:  $-2\pi^2[h^2a^{*2} \times U_{11} + \dots + 2hka^* \times b^* \times U_{12}]$

| Atom | $U_{11}$  | $U_{22}$  | $U_{33}$  | $U_{23}$ | $U_{13}$ | $U_{12}$ |
|------|-----------|-----------|-----------|----------|----------|----------|
| Br1  | 28.53(13) | 20.30(12) | 23.42(12) | -5.26(7) | 6.50(8)  | -2.52(7) |
| O1   | 23.9(7)   | 15.5(7)   | 35.2(8)   | 1.0(6)   | 9.2(6)   | -4.0(5)  |
| N1   | 19.0(7)   | 19.1(8)   | 20.4(7)   | -0.4(6)  | 8.0(6)   | 3.3(6)   |
| C1   | 20.9(8)   | 14.1(8)   | 21.5(8)   | -2.5(7)  | 6.3(7)   | -1.9(7)  |
| C2   | 14.4(8)   | 16.1(9)   | 24.2(9)   | 0.8(7)   | 3.1(6)   | 0.7(7)   |
| C3   | 15.2(8)   | 14.4(8)   | 26.1(9)   | -0.9(7)  | 6.5(7)   | -0.6(7)  |
| C4   | 16.3(8)   | 12.8(8)   | 21.5(8)   | -0.7(7)  | 7.1(6)   | -0.6(6)  |
| C5   | 18.3(8)   | 13.8(8)   | 21.0(9)   | -0.2(7)  | 7.3(7)   | -1.6(6)  |
| C6   | 23.1(9)   | 17.9(9)   | 25.3(9)   | 2.9(7)   | 3.0(7)   | -0.4(7)  |
| C7   | 19.1(8)   | 16.6(9)   | 29.7(10)  | 1.2(8)   | 3.8(7)   | 1.6(7)   |
| C8   | 15.5(8)   | 13.6(8)   | 21.6(8)   | -2.1(7)  | 6.2(6)   | -3.1(6)  |
| C9   | 15.5(8)   | 13.6(8)   | 23.9(9)   | -0.8(7)  | 6.1(7)   | -1.9(6)  |
| C10  | 21.7(9)   | 20.2(9)   | 23.5(9)   | -3.7(7)  | 7.0(7)   | 0.5(7)   |
| C11  | 25.6(9)   | 26.5(10)  | 20.8(9)   | 0.3(8)   | 5.2(7)   | -2.8(8)  |
| C12  | 23.5(9)   | 21.2(10)  | 23.5(9)   | 1.6(7)   | 3.4(7)   | -3.6(7)  |
| C13  | 18.1(8)   | 14.2(9)   | 26.0(9)   | -0.9(7)  | 6.0(7)   | -0.5(6)  |
| C14  | 19.3(9)   | 23.8(10)  | 31.9(10)  | -3.0(8)  | 12.1(7)  | 0.3(7)   |
| C15  | 21.3(9)   | 13.2(9)   | 30.9(10)  | -1.0(7)  | 6.0(7)   | -1.9(7)  |
| C16  | 22.0(9)   | 21.9(10)  | 27.3(10)  | -3.0(8)  | 12.0(7)  | 2.0(7)   |

**Table 21:** Bond Lengths in Å for **JW622B**.

| Atom | Atom | Length/Å   | Atom | Atom | Length/Å |
|------|------|------------|------|------|----------|
| Br1  | C1   | 1.9347(18) | C1   | C5   | 1.539(2) |
| O1   | C2   | 1.201(2)   | C1   | C6   | 1.539(3) |
| N1   | C5   | 1.460(2)   | C2   | C3   | 1.523(3) |
| N1   | C8   | 1.383(2)   | C3   | C4   | 1.574(2) |
| N1   | C16  | 1.456(2)   | C3   | C7   | 1.549(3) |
| C1   | C2   | 1.536(2)   | C3   | C14  | 1.516(3) |

**The Rigaku Synergy S Diffractometer was purchased with Support from the MRI program by the National Science Foundation under Grant No. 1919565.**

| Atom | Atom | Length/Å | Atom | Atom | Length/Å |
|------|------|----------|------|------|----------|
| C4   | C5   | 1.594(2) | C8   | C13  | 1.396(3) |
| C4   | C9   | 1.521(3) | C9   | C10  | 1.380(3) |
| C4   | C15  | 1.532(3) | C10  | C11  | 1.401(3) |
| C6   | C7   | 1.558(3) | C11  | C12  | 1.382(3) |
| C8   | C9   | 1.398(2) | C12  | C13  | 1.396(3) |

**Table 22:** Bond Angles in ° for JW622B.

| Atom | Atom | Atom | Angle/°    | Atom | Atom | Atom | Angle/°    |
|------|------|------|------------|------|------|------|------------|
| C8   | N1   | C5   | 110.36(14) | C9   | C4   | C5   | 101.65(14) |
| C8   | N1   | C16  | 120.40(15) | C9   | C4   | C15  | 110.62(15) |
| C16  | N1   | C5   | 121.50(15) | C15  | C4   | C3   | 113.72(14) |
| C2   | C1   | Br1  | 114.99(13) | C15  | C4   | C5   | 112.72(14) |
| C2   | C1   | C5   | 99.91(14)  | N1   | C5   | C1   | 113.97(15) |
| C2   | C1   | C6   | 101.86(14) | N1   | C5   | C4   | 105.84(14) |
| C5   | C1   | Br1  | 115.21(12) | C1   | C5   | C4   | 102.47(14) |
| C6   | C1   | Br1  | 114.91(13) | C1   | C6   | C7   | 103.06(15) |
| C6   | C1   | C5   | 108.18(15) | C3   | C7   | C6   | 104.63(15) |
| O1   | C2   | C1   | 130.45(17) | N1   | C8   | C9   | 111.78(16) |
| O1   | C2   | C3   | 131.59(17) | N1   | C8   | C13  | 126.87(16) |
| C3   | C2   | C1   | 97.96(14)  | C13  | C8   | C9   | 121.34(17) |
| C2   | C3   | C4   | 99.67(13)  | C8   | C9   | C4   | 110.00(16) |
| C2   | C3   | C7   | 97.81(15)  | C10  | C9   | C4   | 129.69(17) |
| C7   | C3   | C4   | 109.03(14) | C10  | C9   | C8   | 120.14(17) |
| C14  | C3   | C2   | 115.80(16) | C9   | C10  | C11  | 119.26(18) |
| C14  | C3   | C4   | 117.14(15) | C12  | C11  | C10  | 120.03(18) |
| C14  | C3   | C7   | 114.80(15) | C11  | C12  | C13  | 121.74(18) |
| C3   | C4   | C5   | 103.88(14) | C8   | C13  | C12  | 117.44(17) |
| C9   | C4   | C3   | 113.47(14) |      |      |      |            |

**Table 23:** Torsion Angles in ° for JW622B.

| Atom | Atom | Atom | Atom | Angle/°     |
|------|------|------|------|-------------|
| Br1  | C1   | C2   | O1   | -2.0(3)     |
| Br1  | C1   | C2   | C3   | 177.64(12)  |
| Br1  | C1   | C5   | N1   | 47.71(19)   |
| Br1  | C1   | C5   | C4   | 161.56(12)  |
| Br1  | C1   | C6   | C7   | -151.72(12) |
| O1   | C2   | C3   | C4   | -126.0(2)   |
| O1   | C2   | C3   | C7   | 123.0(2)    |
| O1   | C2   | C3   | C14  | 0.6(3)      |
| N1   | C8   | C9   | C4   | 4.4(2)      |
| N1   | C8   | C9   | C10  | -179.96(16) |
| N1   | C8   | C13  | C12  | 178.60(17)  |
| C1   | C2   | C3   | C4   | 54.38(15)   |
| C1   | C2   | C3   | C7   | -56.55(15)  |
| C1   | C2   | C3   | C14  | -179.01(15) |
| C1   | C6   | C7   | C3   | -8.37(18)   |
| C2   | C1   | C5   | N1   | -76.08(17)  |
| C2   | C1   | C5   | C4   | 37.76(16)   |
| C2   | C1   | C6   | C7   | -26.73(17)  |
| C2   | C3   | C4   | C5   | -30.56(17)  |
| C2   | C3   | C4   | C9   | 78.96(17)   |

The Rigaku Synergy S Diffractometer was purchased with Support from the MRI program by the National Science Foundation under Grant No. 1919565.

| Atom | Atom | Atom | Atom | Angle/°     |
|------|------|------|------|-------------|
| C2   | C3   | C4   | C15  | -153.45(15) |
| C2   | C3   | C7   | C6   | 40.32(17)   |
| C3   | C4   | C5   | N1   | 115.12(15)  |
| C3   | C4   | C5   | C1   | -4.57(17)   |
| C3   | C4   | C9   | C8   | -111.59(17) |
| C3   | C4   | C9   | C10  | 73.3(2)     |
| C4   | C3   | C7   | C6   | -62.78(18)  |
| C4   | C9   | C10  | C11  | 176.02(18)  |
| C5   | N1   | C8   | C9   | -6.5(2)     |
| C5   | N1   | C8   | C13  | 172.84(17)  |
| C5   | C1   | C2   | O1   | 122.0(2)    |
| C5   | C1   | C2   | C3   | -58.41(15)  |
| C5   | C1   | C6   | C7   | 77.99(17)   |
| C5   | C4   | C9   | C8   | -0.71(18)   |
| C5   | C4   | C9   | C10  | -175.80(18) |
| C6   | C1   | C2   | O1   | -126.9(2)   |
| C6   | C1   | C2   | C3   | 52.71(16)   |
| C6   | C1   | C5   | N1   | 177.85(15)  |
| C6   | C1   | C5   | C4   | -68.31(17)  |
| C7   | C3   | C4   | C5   | 71.25(17)   |
| C7   | C3   | C4   | C9   | -179.23(15) |
| C7   | C3   | C4   | C15  | -51.6(2)    |
| C8   | N1   | C5   | C1   | 117.52(16)  |
| C8   | N1   | C5   | C4   | 5.69(19)    |
| C8   | C9   | C10  | C11  | 1.3(3)      |
| C9   | C4   | C5   | N1   | -2.90(17)   |
| C9   | C4   | C5   | C1   | -122.59(14) |
| C9   | C8   | C13  | C12  | -2.1(3)     |
| C9   | C10  | C11  | C12  | -1.8(3)     |
| C10  | C11  | C12  | C13  | 0.3(3)      |
| C11  | C12  | C13  | C8   | 1.6(3)      |
| C13  | C8   | C9   | C4   | -174.97(16) |
| C13  | C8   | C9   | C10  | 0.7(3)      |
| C14  | C3   | C4   | C5   | -156.26(16) |
| C14  | C3   | C4   | C9   | -46.7(2)    |
| C14  | C3   | C4   | C15  | 80.8(2)     |
| C14  | C3   | C7   | C6   | 163.51(16)  |
| C15  | C4   | C5   | N1   | -121.33(16) |
| C15  | C4   | C5   | C1   | 118.99(16)  |
| C15  | C4   | C9   | C8   | 119.22(16)  |
| C15  | C4   | C9   | C10  | -55.9(2)    |
| C16  | N1   | C5   | C1   | -93.1(2)    |
| C16  | N1   | C5   | C4   | 155.06(16)  |
| C16  | N1   | C8   | C9   | -156.24(17) |
| C16  | N1   | C8   | C13  | 23.1(3)     |

**Table 24:** Hydrogen Fractional Atomic Coordinates ( $\times 10^4$ ) and Equivalent Isotropic Displacement Parameters ( $\text{\AA}^2 \times 10^3$ ) for **JW622B**.  $U_{eq}$  is defined as 1/3 of the trace of the orthogonalised  $U_{ij}$ .

| Atom | x       | y       | z       | $U_{eq}$ |
|------|---------|---------|---------|----------|
| H5   | 6777.83 | 2608.82 | 4314.61 | 21       |
| H6A  | 8261.47 | 1351.89 | 5142.22 | 27       |
| H6B  | 9246.97 | 2696.22 | 5466.49 | 27       |
| H7A  | 9886.17 | 1729.01 | 4286.42 | 26       |
| H7B  | 8987.56 | 132.77  | 4052.97 | 26       |

**The Rigaku Synergy S Diffractometer was purchased with Support from the MRI program by the National Science Foundation under Grant No. 1919565.**

| <b>Atom</b> | <b>x</b> | <b>y</b> | <b>z</b> | <b><i>U</i><sub>eq</sub></b> |
|-------------|----------|----------|----------|------------------------------|
| H10         | 7268.6   | 2435.03  | 1314.59  | 26                           |
| H11         | 6230.59  | 4544.27  | 303.8    | 29                           |
| H12         | 5250.63  | 6949.23  | 804.21   | 27                           |
| H13         | 5279.39  | 7355.41  | 2317.71  | 23                           |
| H14A        | 9050.73  | 1518.22  | 2301.32  | 36                           |
| H14B        | 9882.83  | 3040.98  | 2795.2   | 36                           |
| H14C        | 8891.31  | 3889.96  | 2175.51  | 36                           |
| H15A        | 6475.33  | 171.13   | 2961.89  | 33                           |
| H15B        | 7474     | -412.66  | 3645.43  | 33                           |
| H15C        | 7475.05  | -307.63  | 2613.13  | 33                           |
| H16A        | 5726.02  | 7498.74  | 4014.65  | 34                           |
| H16B        | 5872.57  | 5620.71  | 4673.16  | 34                           |
| H16C        | 5077.35  | 5505.9   | 3763.62  | 34                           |

### Citations

**CrysAlisPro** (Rigaku, V1.171.42.59a, 2022)

CrysAlisPro (ROD), Rigaku Oxford Diffraction, Poland (?).

O.V. Dolomanov and L.J. Bourhis and R.J. Gildea and J.A.K. Howard and H. Puschmann, Olex2: A complete structure solution, refinement and analysis program, *J. Appl. Cryst.*, (2009), **42**, 339-341.

Sheldrick, G.M., Crystal structure refinement with ShelXL, *Acta Cryst.*, (2015), **C71**, 3-8.

Sheldrick, G.M., ShelXT-Integrated space-group and crystal-structure determination, *Acta Cryst.*, (2015), **A71**, 3-8.

**The Rigaku Synergy S Diffractometer was purchased with Support from the MRI program by the National Science Foundation under Grant No. 1919565.**



# Compound 10b

Submitted by: **Jimmy Wu**

Date Collected: **9-23-2022**

Solved by: **Richard J Staples**

Sample ID: **ZTP-4-33**

Crystal structure and relative chirality was determined.

## Crystal Data and Experimental



Center Crystallographic for Research  
Michigan State University  
Department of Chemistry  
East Lansing, MI 48824  
**Dr. Richard J. Staples**  
staples@chemistry.msu.edu

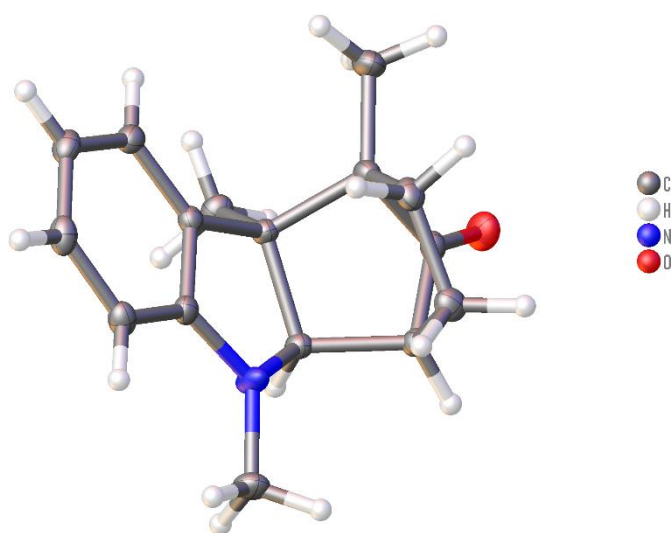

**Experimental.** Single colourless irregular-shaped crystals of **JW922A** used as received. A suitable crystal with dimensions  $0.20 \times 0.17 \times 0.17 \text{ mm}^3$  was selected and mounted on a nylon loop with paratone oil on a XtaLAB Synergy, Dualflex, HyPix diffractometer. The crystal was kept at a steady  $T = 100.00(10) \text{ K}$  during data collection. The structure was solved with the **ShelXS** (Sheldrick, 2008) solution program using direct methods and by using **Olex2** 1.5 (Dolomanov et al., 2009) as the graphical interface. The model was refined with **ShelXL** 2018/3 (Sheldrick, 2015) using full matrix least squares minimisation on  $F^2$ .

**Crystal Data.**  $\text{C}_{16}\text{H}_{19}\text{NO}$ ,  $M_r = 241.32$ , monoclinic,  $P2_1/n$  (No. 14),  $a = 14.04898(14) \text{ \AA}$ ,  $b = 6.21142(6) \text{ \AA}$ ,  $c = 15.50317(18) \text{ \AA}$ ,  $\beta = 106.1247(12)^\circ$ ,  $\alpha = \gamma = 90^\circ$ ,  $V = 1299.65(2) \text{ \AA}^3$ ,  $T = 100.00(10) \text{ K}$ ,  $Z = 4$ ,  $Z' = 1$ ,  $\mu(\text{Cu K}\alpha) = 0.593$ , 28434 reflections measured, 2808 unique ( $R_{\text{int}} = 0.0323$ ) which were used in all calculations. The final  $wR_2$  was 0.0967 (all data) and  $R_1$  was 0.0379 ( $I \geq 2 \sigma(I)$ ).

| Compound                              | JW922A                                |
|---------------------------------------|---------------------------------------|
| Formula                               | $\text{C}_{16}\text{H}_{19}\text{NO}$ |
| $D_{\text{calc.}} / \text{g cm}^{-3}$ | 1.233                                 |
| $\mu / \text{mm}^{-1}$                | 0.593                                 |
| Formula Weight                        | 241.32                                |
| Color                                 | colourless                            |
| Shape                                 | irregular-shaped                      |
| Size/ $\text{mm}^3$                   | $0.20 \times 0.17 \times 0.17$        |
| $T / \text{K}$                        | 100.00(10)                            |
| Crystal System                        | monoclinic                            |
| Space Group                           | $P2_1/n$                              |
| $a / \text{Å}$                        | 14.04898(14)                          |
| $b / \text{Å}$                        | 6.21142(6)                            |
| $c / \text{Å}$                        | 15.50317(18)                          |
| $\alpha^\circ$                        | 90                                    |
| $\beta^\circ$                         | 106.1247(12)                          |
| $\gamma^\circ$                        | 90                                    |
| $V / \text{Å}^3$                      | 1299.65(2)                            |
| $Z$                                   | 4                                     |
| $Z'$                                  | 1                                     |
| Wavelength/ $\text{Å}$                | 1.54184                               |
| Radiation type                        | Cu $K_\alpha$                         |
| $\theta_{\text{min}} / ^\circ$        | 3.760                                 |
| $\theta_{\text{max}} / ^\circ$        | 80.079                                |
| Measured Refl's.                      | 28434                                 |
| Indep't Refl's                        | 2808                                  |
| Refl's $I \geq 2 \sigma(I)$           | 2690                                  |
| $R_{\text{int}}$                      | 0.0323                                |
| Parameters                            | 167                                   |
| Restraints                            | 0                                     |
| Largest Peak                          | 0.304                                 |
| Deepest Hole                          | -0.297                                |
| Goof                                  | 1.088                                 |
| $wR_2$ (all data)                     | 0.0967                                |
| $wR_2$                                | 0.0959                                |
| $R_1$ (all data)                      | 0.0390                                |
| $R_1$                                 | 0.0379                                |

**The Rigaku Synergy S Diffractometer was purchased with Support from the MRI program by the National Science Foundation under Grant No. 1919565.**

## Structure Quality Indicators

|                     |                           |       |          |      |          |       |                              |       |
|---------------------|---------------------------|-------|----------|------|----------|-------|------------------------------|-------|
| <b>Reflections:</b> | d min (Cu\α)<br>2θ=160.3° | 0.78  | I/σ(I)   | 70.8 | Rint     | 3.23% | Full 135.4°<br>99% to 160.3° | 100   |
| <b>Refinement:</b>  | Shift                     | 0.000 | Max Peak | 0.3  | Min Peak | -0.3  | Goof                         | 1.088 |

A colourless irregular-shaped crystal with dimensions 0.20×0.17×0.17 mm<sup>3</sup> was mounted on a nylon loop with paratone oil. Data were collected using a XtaLAB Synergy, Dualflex, HyPix diffractometer equipped with an Oxford Cryosystems low-temperature device, operating at  $T = 100.00(10)$  K.

MSU Data were measured using  $\omega$  scans using Cu K $\alpha$  radiation (micro-focus sealed X-ray tube, 50 kV, 1 mA). The total number of runs and images was based on the strategy calculation from the program CrysAlisPro 1.171.42.69a (Rigaku OD, 2022). The achieved resolution was  $\theta = 80.079$ .

Cell parameters were retrieved using the CrysAlisPro 1.171.42.69a (Rigaku OD, 2022) software and refined using CrysAlisPro 1.171.42.69a (Rigaku OD, 2022) on 19091 reflections, 67 % of the observed reflections. Data reduction was performed using the CrysAlisPro 1.171.42.69a (Rigaku OD, 2022) software which corrects for Lorentz polarization. The final completeness is 100.00 out to 80.079 in  $\theta$  CrysAlisPro 1.171.42.69a (Rigaku Oxford Diffraction, 2022) Numerical absorption correction based on gaussian integration over a multifaceted crystal model Empirical absorption correction using spherical harmonics, implemented in SCALE3 ABSPACK scaling algorithm.

The structure was solved in the space group  $P2_1/n$  (# 14) by using direct methods using the ShelXS (Sheldrick, 2008) structure solution program. The structure was refined by Least Squares ShelXL incorporated in Olex2 software program. All non-hydrogen atoms were refined anisotropically. Hydrogen atom positions were calculated geometrically and refined using the riding model, except for the hydrogen atom on the non-carbon atom(s) which were found by difference Fourier methods and refined isotropically when data permits.

There is a single molecule in the asymmetric unit, which is represented by the reported sum formula. In other words: Z is 4 and Z' is 1.

**The Rigaku Synergy S Diffractometer was purchased with Support from the MRI program by the National Science Foundation under Grant No. 1919565.**

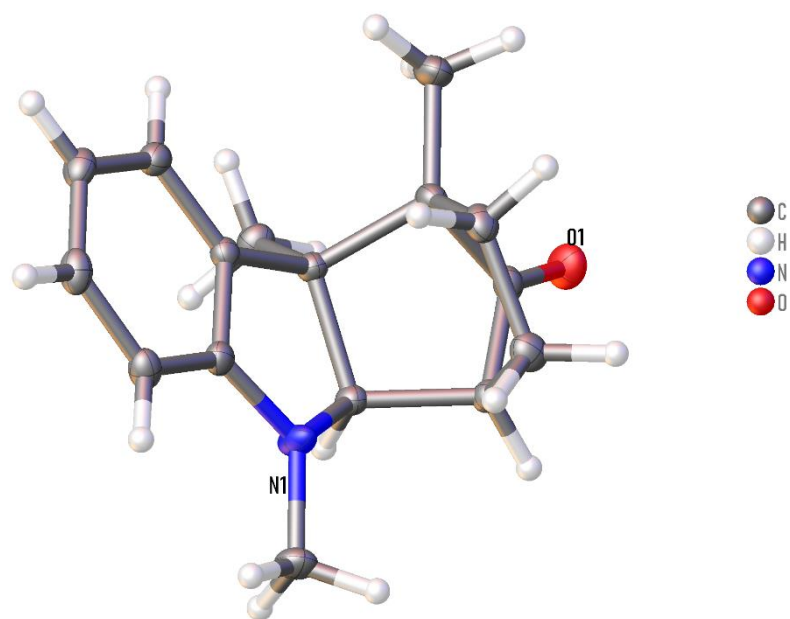

**Figure 12:**

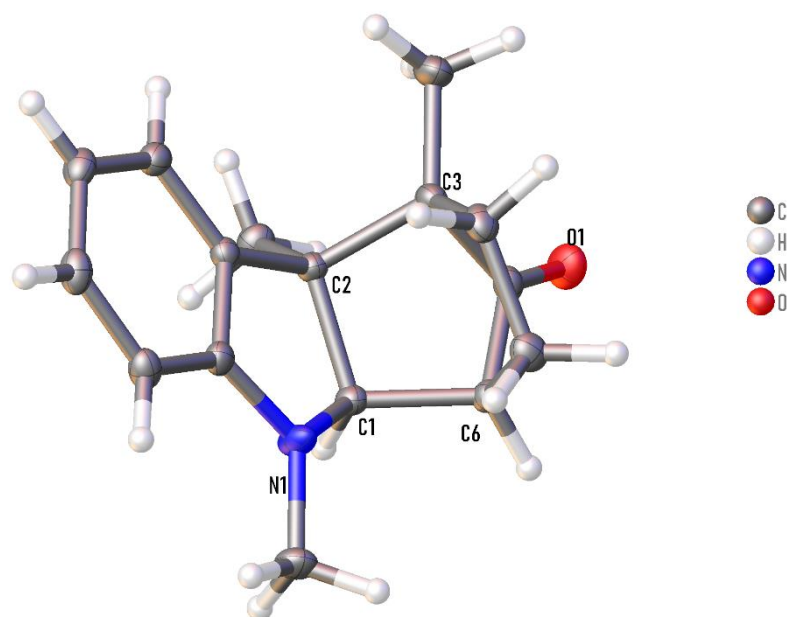

**Figure 13:** Model has Chirality at C1 (Centro SPGR) R. Model has Chirality at C2 (Centro SPGR) S. Model has Chirality at C3 (Centro SPGR) R. Model has Chirality at C6 (Centro SPGR) S.

**The Rigaku Synergy S Diffractometer was purchased with Support from the MRI program by the National Science Foundation under Grant No. 1919565.**

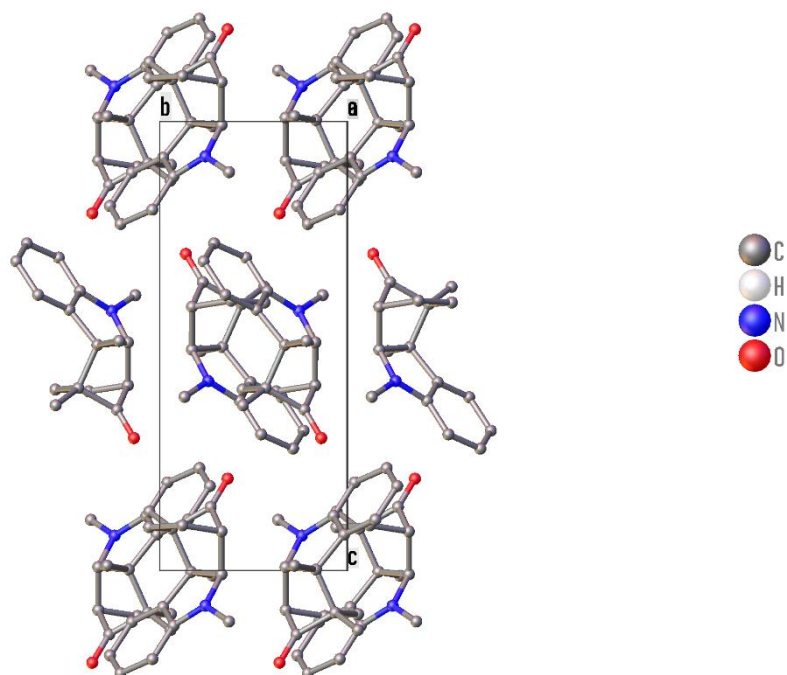

**Figure 14:** Packing diagram of JW922A.

**Data Plots: Diffraction Data**

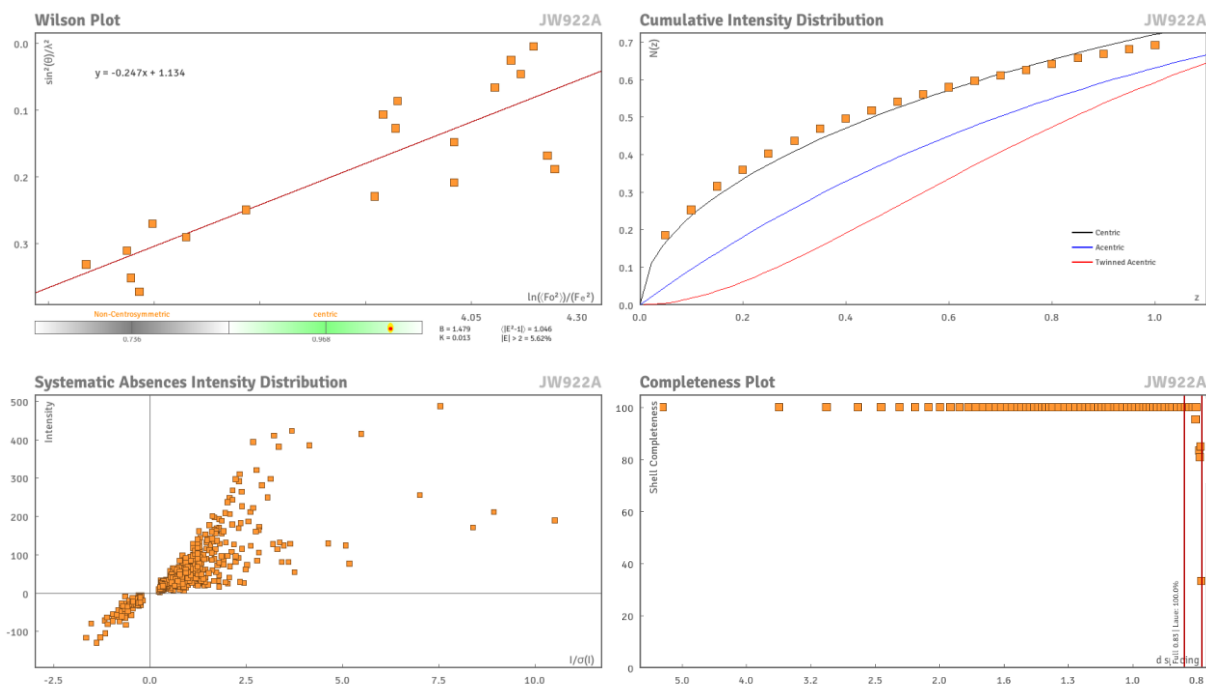

The Rigaku Synergy S Diffractometer was purchased with Support from the MRI program by the National Science Foundation under Grant No. 1919565.

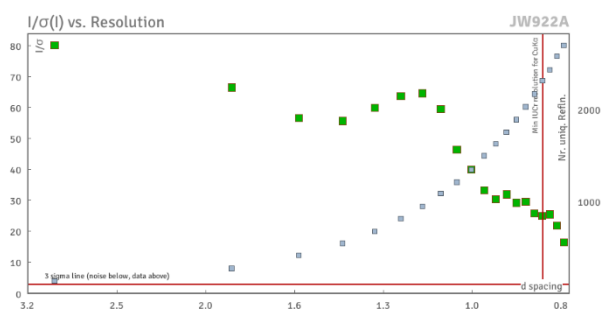

## Data Plots: Refinement and Data

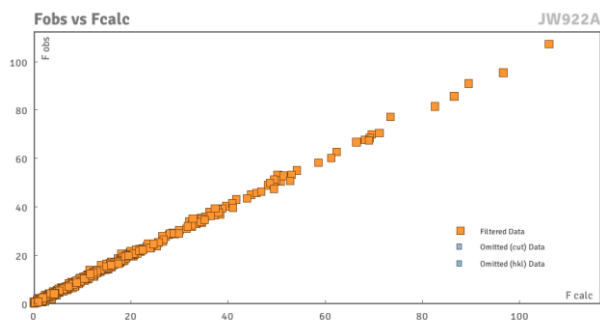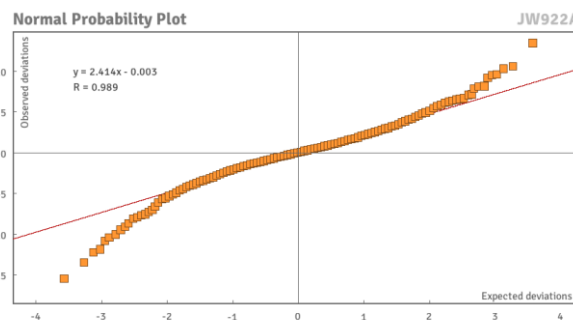

## Reflection Statistics

|                                     |                                                            |                            |                |
|-------------------------------------|------------------------------------------------------------|----------------------------|----------------|
| Total reflections (after filtering) | 29823                                                      | Unique reflections         | 2808           |
| Completeness                        | 0.993                                                      | Mean $I/\sigma$            | 43.28          |
| $hkl_{\max}$ collected              | (17, 7, 16)                                                | $hkl_{\min}$ collected     | (-17, -7, -19) |
| $hkl_{\max}$ used                   | (17, 7, 19)                                                | $hkl_{\min}$ used          | (-17, 0, 0)    |
| Lim $d_{\max}$ collected            | 100.0                                                      | Lim $d_{\min}$ collected   | 0.77           |
| $d_{\max}$ used                     | 14.89                                                      | $d_{\min}$ used            | 0.78           |
| Friedel pairs                       | 3900                                                       | Friedel pairs merged       | 1              |
| Inconsistent equivalents            | 1                                                          | $R_{\text{int}}$           | 0.0323         |
| $R_{\text{sigma}}$                  | 0.0141                                                     | Intensity transformed      | 0              |
| Omitted reflections                 | 0                                                          | Omitted by user (OMIT hkl) | 0              |
| Multiplicity                        | (1613, 2326, 2089, 1507, 915, 538, 243, 98, 54, 23, 17, 6) | Maximum multiplicity       | 26             |
| Removed systematic absences         | 1389                                                       | Filtered off (Shel/OMIT)   | 0              |

## Selected Crystal Pictures

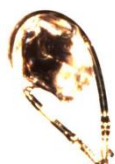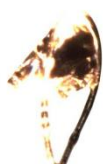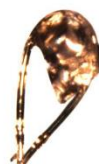

The Rigaku Synergy S Diffractometer was purchased with Support from the MRI program by the National Science Foundation under Grant No. 1919565.

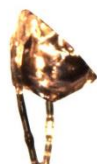

**Table 25:** Fractional Atomic Coordinates ( $\times 10^4$ ) and Equivalent Isotropic Displacement Parameters ( $\text{\AA}^2 \times 10^3$ ) for **JW922A**.  $U_{eq}$  is defined as 1/3 of the trace of the orthogonalised  $U_{ij}$ .

| Atom | x         | y          | z         | $U_{eq}$ |
|------|-----------|------------|-----------|----------|
| C1   | 7027.4(7) | 1708.9(17) | 4919.4(7) | 15.6(2)  |
| C2   | 7909.0(7) | 3335.8(16) | 4974.9(7) | 14.8(2)  |
| C3   | 8069.3(7) | 4356.9(17) | 5932.3(7) | 17.0(2)  |
| C4   | 7120.4(8) | 5581.8(18) | 5968.0(7) | 20.2(2)  |
| C5   | 6351.8(8) | 3797.0(18) | 6009.7(8) | 20.9(2)  |
| C6   | 6877.2(7) | 1711.6(17) | 5874.3(7) | 16.1(2)  |
| C7   | 7925.0(7) | 2289.7(17) | 6419.2(7) | 16.8(2)  |
| C8   | 6492.8(7) | 4269.4(17) | 3779.0(7) | 16.1(2)  |
| C9   | 5933.8(8) | 5401.5(18) | 3034.2(7) | 19.2(2)  |
| C10  | 6390.6(8) | 7106.5(18) | 2717.0(7) | 20.5(2)  |
| C11  | 7369.9(8) | 7666.6(17) | 3115.7(7) | 19.8(2)  |
| C12  | 7923.3(8) | 6506.4(17) | 3861.1(7) | 17.4(2)  |
| C13  | 7483.2(7) | 4831.2(17) | 4193.6(7) | 14.9(2)  |
| C14  | 5319.7(8) | 1312.3(19) | 3869.1(8) | 23.1(2)  |
| C15  | 8840.6(8) | 2178.8(18) | 4887.3(7) | 19.9(2)  |
| C16  | 9027.3(9) | 5568(2)    | 6318.9(8) | 25.4(3)  |
| N1   | 6199.0(7) | 2576.9(16) | 4221.1(6) | 21.9(2)  |
| O1   | 8483.7(6) | 1387.5(14) | 7047.6(5) | 25.3(2)  |

**Table 26:** Anisotropic Displacement Parameters ( $\times 10^4$ ) for **JW922A**. The anisotropic displacement factor exponent takes the form:  $-2\pi^2[h^2a^{*2} \times U_{11} + \dots + 2hka^* \times b^* \times U_{12}]$

| Atom | $U_{11}$ | $U_{22}$ | $U_{33}$ | $U_{23}$ | $U_{13}$ | $U_{12}$ |
|------|----------|----------|----------|----------|----------|----------|
| C1   | 16.1(5)  | 15.4(5)  | 14.9(5)  | -0.2(4)  | 3.7(4)   | -2.4(4)  |
| C2   | 14.8(5)  | 15.1(5)  | 14.3(5)  | 0.2(4)   | 3.7(4)   | -2.0(4)  |
| C3   | 18.4(5)  | 18.0(5)  | 13.6(5)  | -0.3(4)  | 2.8(4)   | -3.3(4)  |
| C4   | 27.1(6)  | 16.9(5)  | 17.3(5)  | -2.1(4)  | 7.1(4)   | 0.8(4)   |
| C5   | 19.2(5)  | 22.9(6)  | 21.3(5)  | -3.0(4)  | 6.5(4)   | 1.6(4)   |
| C6   | 16.1(5)  | 17.1(5)  | 15.3(5)  | 1.7(4)   | 4.7(4)   | -1.2(4)  |
| C7   | 18.0(5)  | 19.7(5)  | 13.3(5)  | -0.2(4)  | 5.1(4)   | 0.0(4)   |
| C8   | 16.7(5)  | 18.8(5)  | 13.9(5)  | -0.9(4)  | 6.0(4)   | -0.8(4)  |
| C9   | 16.2(5)  | 25.5(6)  | 16.0(5)  | 0.4(4)   | 4.7(4)   | 2.9(4)   |
| C10  | 24.3(5)  | 21.7(5)  | 16.4(5)  | 3.8(4)   | 7.3(4)   | 7.8(4)   |
| C11  | 26.8(5)  | 15.9(5)  | 19.5(5)  | 2.5(4)   | 10.9(4)  | 0.9(4)   |
| C12  | 18.7(5)  | 17.1(5)  | 17.5(5)  | -1.3(4)  | 6.7(4)   | -1.7(4)  |
| C13  | 16.4(5)  | 15.6(5)  | 13.0(5)  | -1.0(4)  | 4.6(4)   | 0.1(4)   |
| C14  | 17.2(5)  | 25.7(6)  | 23.9(5)  | -2.2(4)  | 2.0(4)   | -6.9(4)  |
| C15  | 17.1(5)  | 21.8(5)  | 21.2(5)  | 2.0(4)   | 5.7(4)   | 1.5(4)   |
| C16  | 25.5(6)  | 29.2(6)  | 19.4(5)  | -3.0(5)  | 2.9(4)   | -11.6(5) |
| N1   | 17.9(4)  | 27.4(5)  | 16.5(4)  | 5.6(4)   | -1.7(3)  | -9.1(4)  |
| O1   | 22.6(4)  | 32.1(5)  | 18.5(4)  | 7.8(3)   | 1.2(3)   | 1.5(3)   |

**The Rigaku Synergy S Diffractometer was purchased with Support from the MRI program by the National Science Foundation under Grant No. 1919565.**

**Table 27:** Bond Lengths in Å for JW922A.

| Atom | Atom | Length/Å   | Atom | Atom | Length/Å   |
|------|------|------------|------|------|------------|
| C1   | C2   | 1.5823(14) | C6   | C7   | 1.5227(14) |
| C1   | C6   | 1.5523(14) | C7   | O1   | 1.2060(13) |
| C1   | N1   | 1.4551(13) | C8   | C9   | 1.3931(15) |
| C2   | C3   | 1.5718(14) | C8   | C13  | 1.4051(14) |
| C2   | C13  | 1.5117(14) | C8   | N1   | 1.3794(14) |
| C2   | C15  | 1.5318(14) | C9   | C10  | 1.3966(16) |
| C3   | C4   | 1.5491(15) | C10  | C11  | 1.3870(16) |
| C3   | C7   | 1.5313(14) | C11  | C12  | 1.4000(15) |
| C3   | C16  | 1.5129(14) | C12  | C13  | 1.3812(14) |
| C4   | C5   | 1.5615(15) | C14  | N1   | 1.4374(13) |
| C5   | C6   | 1.5339(15) |      |      |            |

**Table 28:** Bond Angles in ° for JW922A.

| Atom | Atom | Atom | Angle/°   | Atom | Atom | Atom | Angle/°    |
|------|------|------|-----------|------|------|------|------------|
| C6   | C1   | C2   | 105.02(8) | C7   | C6   | C1   | 99.38(8)   |
| N1   | C1   | C2   | 104.84(8) | C7   | C6   | C5   | 98.79(8)   |
| N1   | C1   | C6   | 114.63(8) | C6   | C7   | C3   | 99.45(8)   |
| C3   | C2   | C1   | 102.34(8) | O1   | C7   | C3   | 129.96(10) |
| C13  | C2   | C1   | 102.66(8) | O1   | C7   | C6   | 130.59(10) |
| C13  | C2   | C3   | 115.45(8) | C9   | C8   | C13  | 120.84(10) |
| C13  | C2   | C15  | 112.02(8) | N1   | C8   | C9   | 128.23(10) |
| C15  | C2   | C1   | 111.76(8) | N1   | C8   | C13  | 110.92(9)  |
| C15  | C2   | C3   | 111.79(8) | C8   | C9   | C10  | 117.78(10) |
| C4   | C3   | C2   | 109.44(8) | C11  | C10  | C9   | 121.96(10) |
| C7   | C3   | C2   | 97.08(8)  | C10  | C11  | C12  | 119.56(10) |
| C7   | C3   | C4   | 99.28(8)  | C13  | C12  | C11  | 119.50(10) |
| C16  | C3   | C2   | 116.94(9) | C8   | C13  | C2   | 109.58(9)  |
| C16  | C3   | C4   | 114.92(9) | C12  | C13  | C2   | 130.05(9)  |
| C16  | C3   | C7   | 116.54(9) | C12  | C13  | C8   | 120.36(9)  |
| C3   | C4   | C5   | 105.35(8) | C8   | N1   | C1   | 111.35(8)  |
| C6   | C5   | C4   | 103.25(8) | C8   | N1   | C14  | 124.90(9)  |
| C5   | C6   | C1   | 109.23(8) | C14  | N1   | C1   | 120.36(9)  |

**Table 29:** Torsion Angles in ° for JW922A.

| Atom | Atom | Atom | Atom | Angle/°     |
|------|------|------|------|-------------|
| C1   | C2   | C3   | C4   | -62.60(10)  |
| C1   | C2   | C3   | C7   | 39.88(9)    |
| C1   | C2   | C3   | C16  | 164.51(9)   |
| C1   | C2   | C13  | C8   | 3.22(11)    |
| C1   | C2   | C13  | C12  | -175.46(10) |
| C1   | C6   | C7   | C3   | 54.32(9)    |
| C1   | C6   | C7   | O1   | -125.35(12) |
| C2   | C1   | C6   | C5   | 75.20(10)   |
| C2   | C1   | C6   | C7   | -27.60(10)  |
| C2   | C1   | N1   | C8   | 8.31(11)    |
| C2   | C1   | N1   | C14  | 168.52(9)   |
| C2   | C3   | C4   | C5   | 73.73(10)   |
| C2   | C3   | C7   | C6   | -59.13(9)   |
| C2   | C3   | C7   | O1   | 120.54(12)  |

The Rigaku Synergy S Diffractometer was purchased with Support from the MRI program by the National Science Foundation under Grant No. 1919565.

| Atom | Atom | Atom | Atom | Angle/°     |
|------|------|------|------|-------------|
| C3   | C2   | C13  | C8   | -107.24(10) |
| C3   | C2   | C13  | C12  | 74.09(14)   |
| C3   | C4   | C5   | C6   | -6.90(10)   |
| C4   | C3   | C7   | C6   | 51.98(9)    |
| C4   | C3   | C7   | O1   | -128.35(12) |
| C4   | C5   | C6   | C1   | -64.68(10)  |
| C4   | C5   | C6   | C7   | 38.53(9)    |
| C5   | C6   | C7   | C3   | -56.99(9)   |
| C5   | C6   | C7   | O1   | 123.34(12)  |
| C6   | C1   | C2   | C3   | -7.86(10)   |
| C6   | C1   | C2   | C13  | -127.86(8)  |
| C6   | C1   | C2   | C15  | 111.91(9)   |
| C6   | C1   | N1   | C8   | 122.91(10)  |
| C6   | C1   | N1   | C14  | -76.88(13)  |
| C7   | C3   | C4   | C5   | -27.23(10)  |
| C8   | C9   | C10  | C11  | 0.59(16)    |
| C9   | C8   | C13  | C2   | -179.59(9)  |
| C9   | C8   | C13  | C12  | -0.77(15)   |
| C9   | C8   | N1   | C1   | 174.86(10)  |
| C9   | C8   | N1   | C14  | 15.73(18)   |
| C9   | C10  | C11  | C12  | -0.29(16)   |
| C10  | C11  | C12  | C13  | -0.54(16)   |
| C11  | C12  | C13  | C2   | 179.62(10)  |
| C11  | C12  | C13  | C8   | 1.06(15)    |
| C13  | C2   | C3   | C4   | 48.05(11)   |
| C13  | C2   | C3   | C7   | 150.53(8)   |
| C13  | C2   | C3   | C16  | -84.84(11)  |
| C13  | C8   | C9   | C10  | -0.06(15)   |
| C13  | C8   | N1   | C1   | -6.62(12)   |
| C13  | C8   | N1   | C14  | -165.75(10) |
| C15  | C2   | C3   | C4   | 177.65(8)   |
| C15  | C2   | C3   | C7   | -79.86(9)   |
| C15  | C2   | C3   | C16  | 44.77(12)   |
| C15  | C2   | C13  | C8   | 123.27(9)   |
| C15  | C2   | C13  | C12  | -55.41(14)  |
| C16  | C3   | C4   | C5   | -152.34(9)  |
| C16  | C3   | C7   | C6   | 175.94(9)   |
| C16  | C3   | C7   | O1   | -4.38(17)   |
| N1   | C1   | C2   | C3   | 113.30(9)   |
| N1   | C1   | C2   | C13  | -6.70(10)   |
| N1   | C1   | C2   | C15  | -126.93(9)  |
| N1   | C1   | C6   | C5   | -39.30(12)  |
| N1   | C1   | C6   | C7   | -142.10(9)  |
| N1   | C8   | C9   | C10  | 178.33(10)  |
| N1   | C8   | C13  | C2   | 1.76(12)    |
| N1   | C8   | C13  | C12  | -179.42(9)  |

**Table 30:** Hydrogen Fractional Atomic Coordinates ( $\times 10^4$ ) and Equivalent Isotropic Displacement Parameters ( $\text{\AA}^2 \times 10^3$ ) for **JW922A**.  $U_{eq}$  is defined as 1/3 of the trace of the orthogonalised  $U_{ij}$ .

| Atom | x       | y       | z       | $U_{eq}$ |
|------|---------|---------|---------|----------|
| H1   | 7203.66 | 234.69  | 4754.84 | 19       |
| H4A  | 6871.77 | 6486.73 | 5426.33 | 24       |
| H4B  | 7254.8  | 6515.12 | 6506.03 | 24       |
| H5A  | 6204.43 | 3801.44 | 6598.17 | 25       |

**The Rigaku Synergy S Diffractometer was purchased with Support from the MRI program by the National Science Foundation under Grant No. 1919565.**



| Atom | x       | y       | z       | $U_{eq}$ |
|------|---------|---------|---------|----------|
| H5B  | 5726.63 | 3992.82 | 5527.59 | 25       |
| H6   | 6600.86 | 355.5   | 6055.74 | 19       |
| H9   | 5264.11 | 5026.15 | 2751.51 | 23       |
| H10  | 6019.44 | 7906.41 | 2213.27 | 25       |
| H11  | 7663.3  | 8829.8  | 2884.46 | 24       |
| H12  | 8596.3  | 6868.54 | 4136.04 | 21       |
| H14A | 4862.78 | 2093.53 | 3375.47 | 35       |
| H14B | 4998.75 | 1045.08 | 4345.16 | 35       |
| H14C | 5498.19 | -63.91  | 3646.79 | 35       |
| H15A | 8678.9  | 1338.11 | 4330.56 | 30       |
| H15B | 9087.72 | 1214.34 | 5401.15 | 30       |
| H15C | 9351.06 | 3243.73 | 4874.22 | 30       |
| H16A | 9589.46 | 4598.47 | 6365.01 | 38       |
| H16B | 9046.12 | 6112.05 | 6916.81 | 38       |
| H16C | 9067    | 6779.58 | 5925.21 | 38       |

### Citations

**CrysAlisPro** (Rigaku, V1.171.42.69a, 2022)

CrysAlisPro (ROD), Rigaku Oxford Diffraction, Poland (?).

O.V. Dolomanov and L.J. Bourhis and R.J. Gildea and J.A.K. Howard and H. Puschmann, Olex2: A complete structure solution, refinement and analysis program, *J. Appl. Cryst.*, (2009), **42**, 339-341.

Sheldrick, G.M., A short history of ShelX, *Acta Cryst.*, (2008), **A64**, 339-341.

Sheldrick, G.M., Crystal structure refinement with ShelXL, *Acta Cryst.*, (2015), **C71**, 3-8.

**The Rigaku Synergy S Diffractometer was purchased with Support from the MRI program by the National Science Foundation under Grant No. 1919565.**

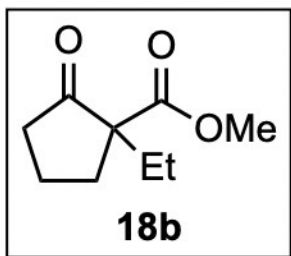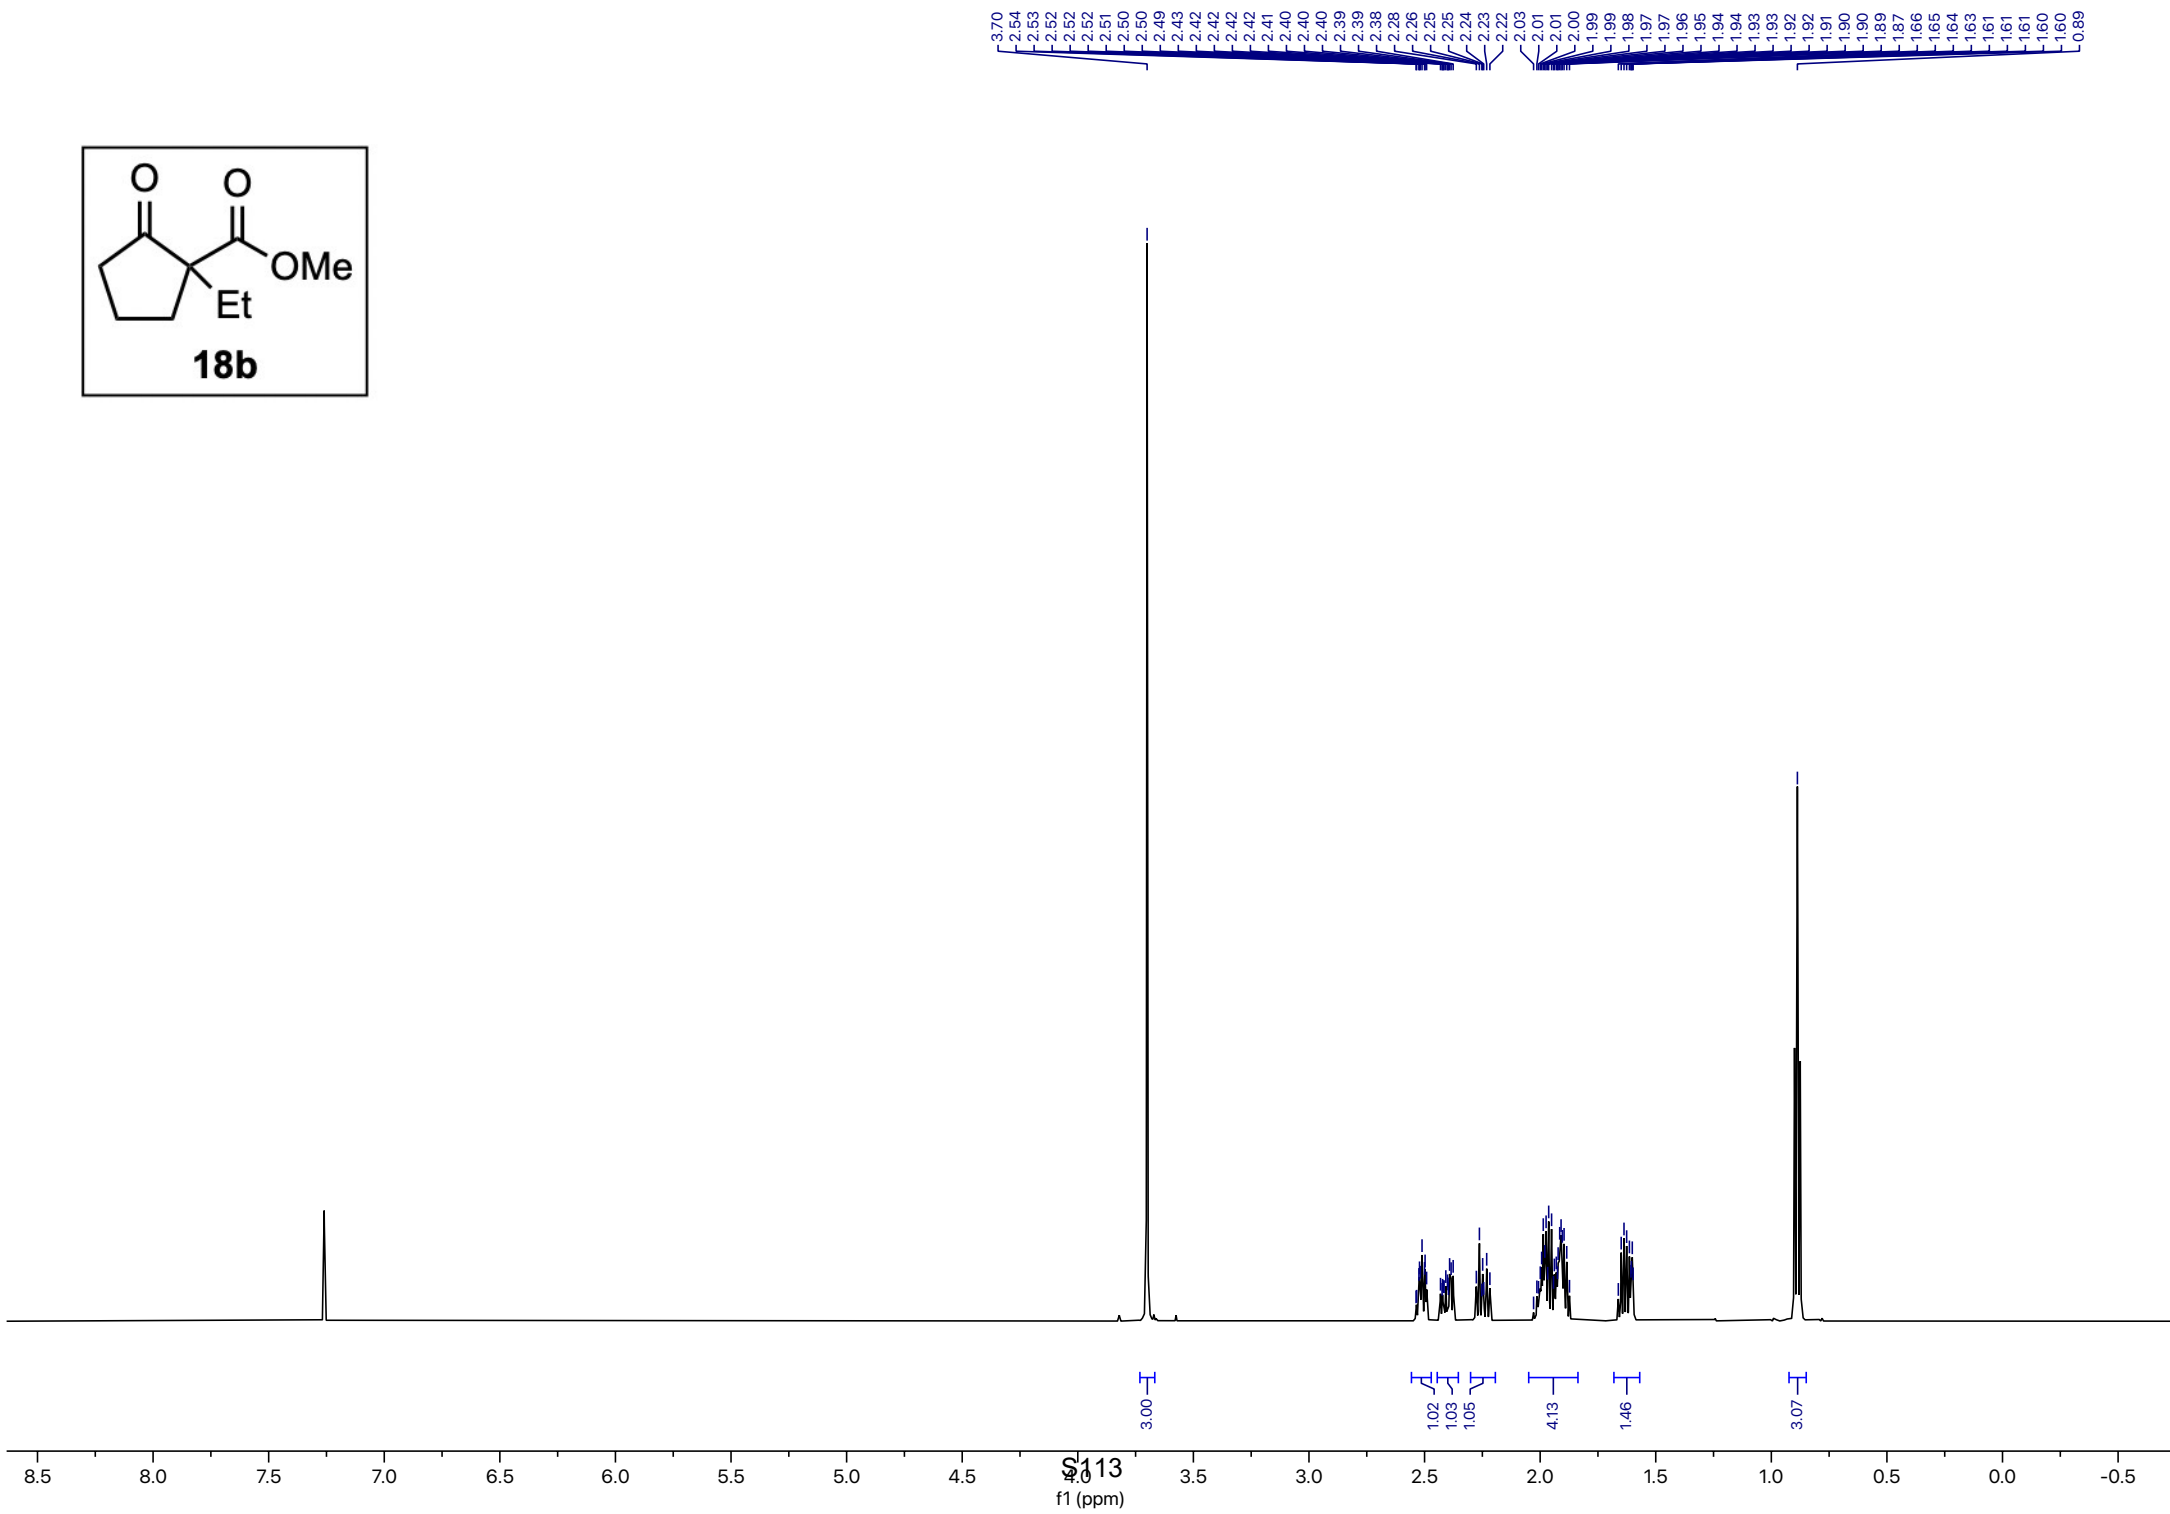

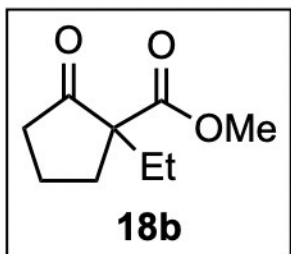

— 215.35

— 171.91

— 61.31

— 52.80

— 36.45

— 32.55

— 27.25

— 19.89

— 9.59

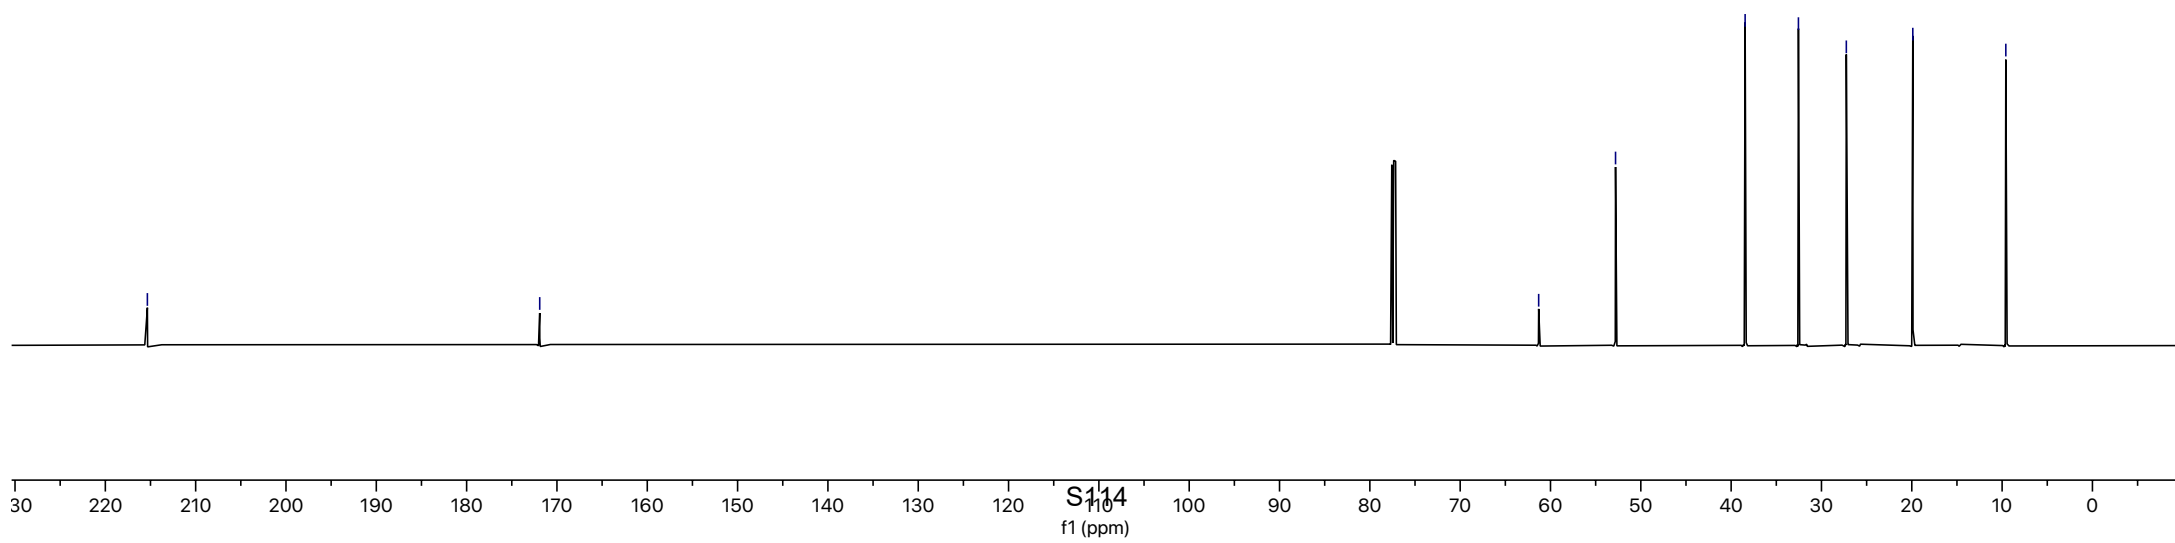

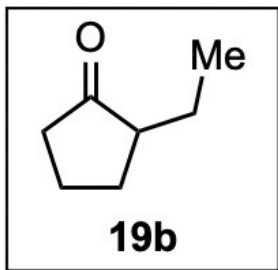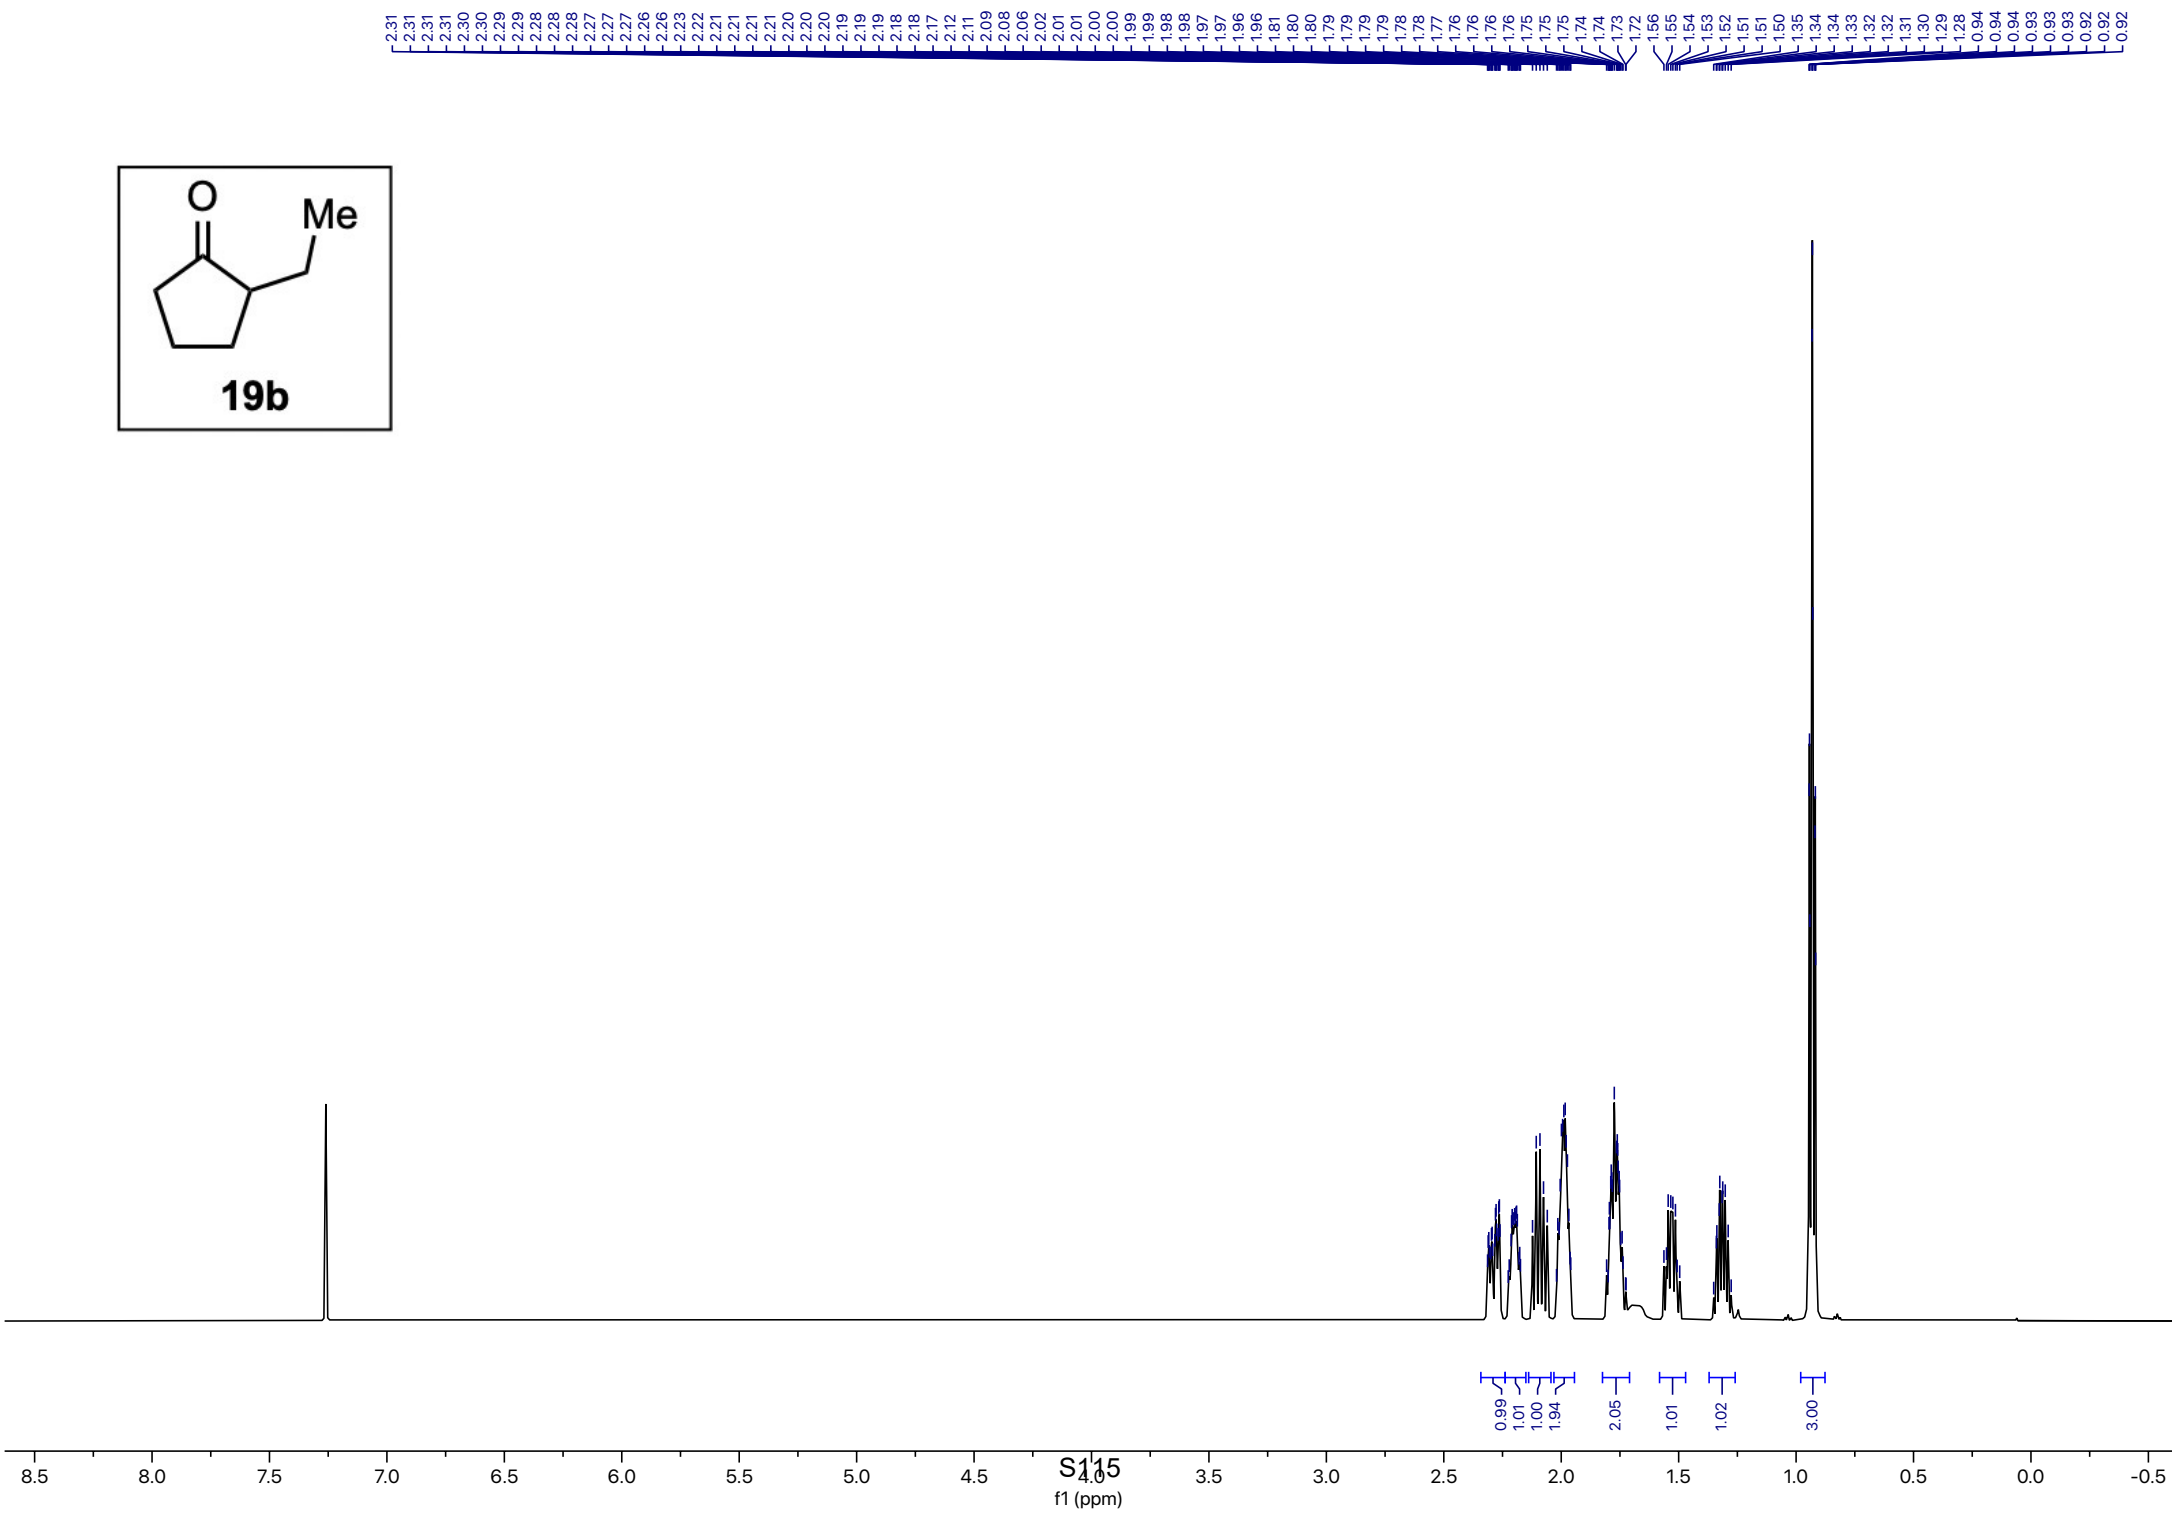

— 221.96



— 50.90

— 38.65

— 29.33

— 22.99

— 21.03

— 12.22

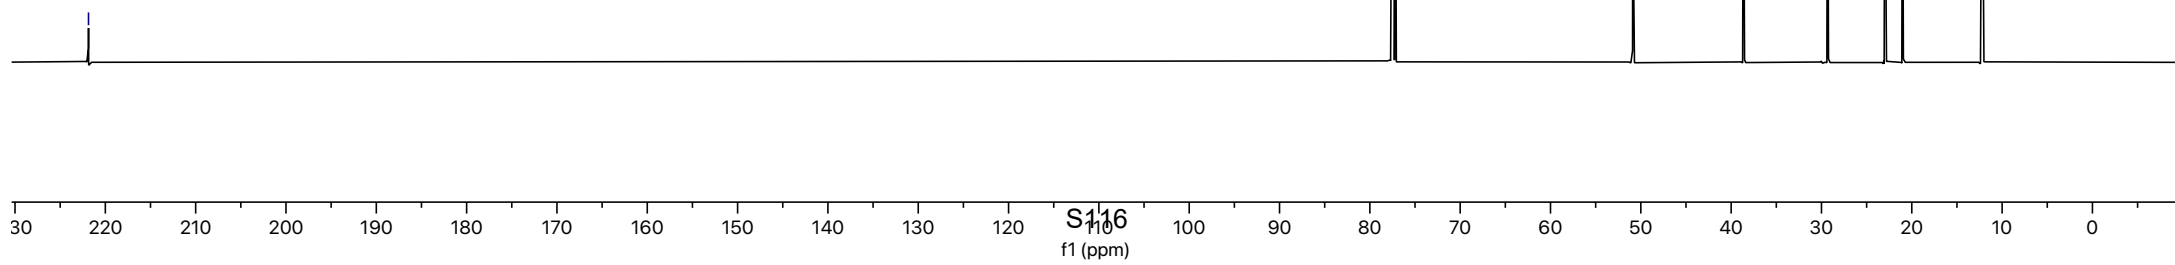

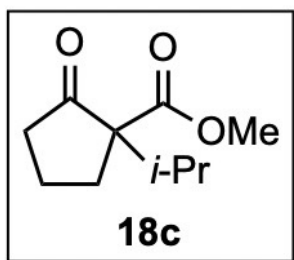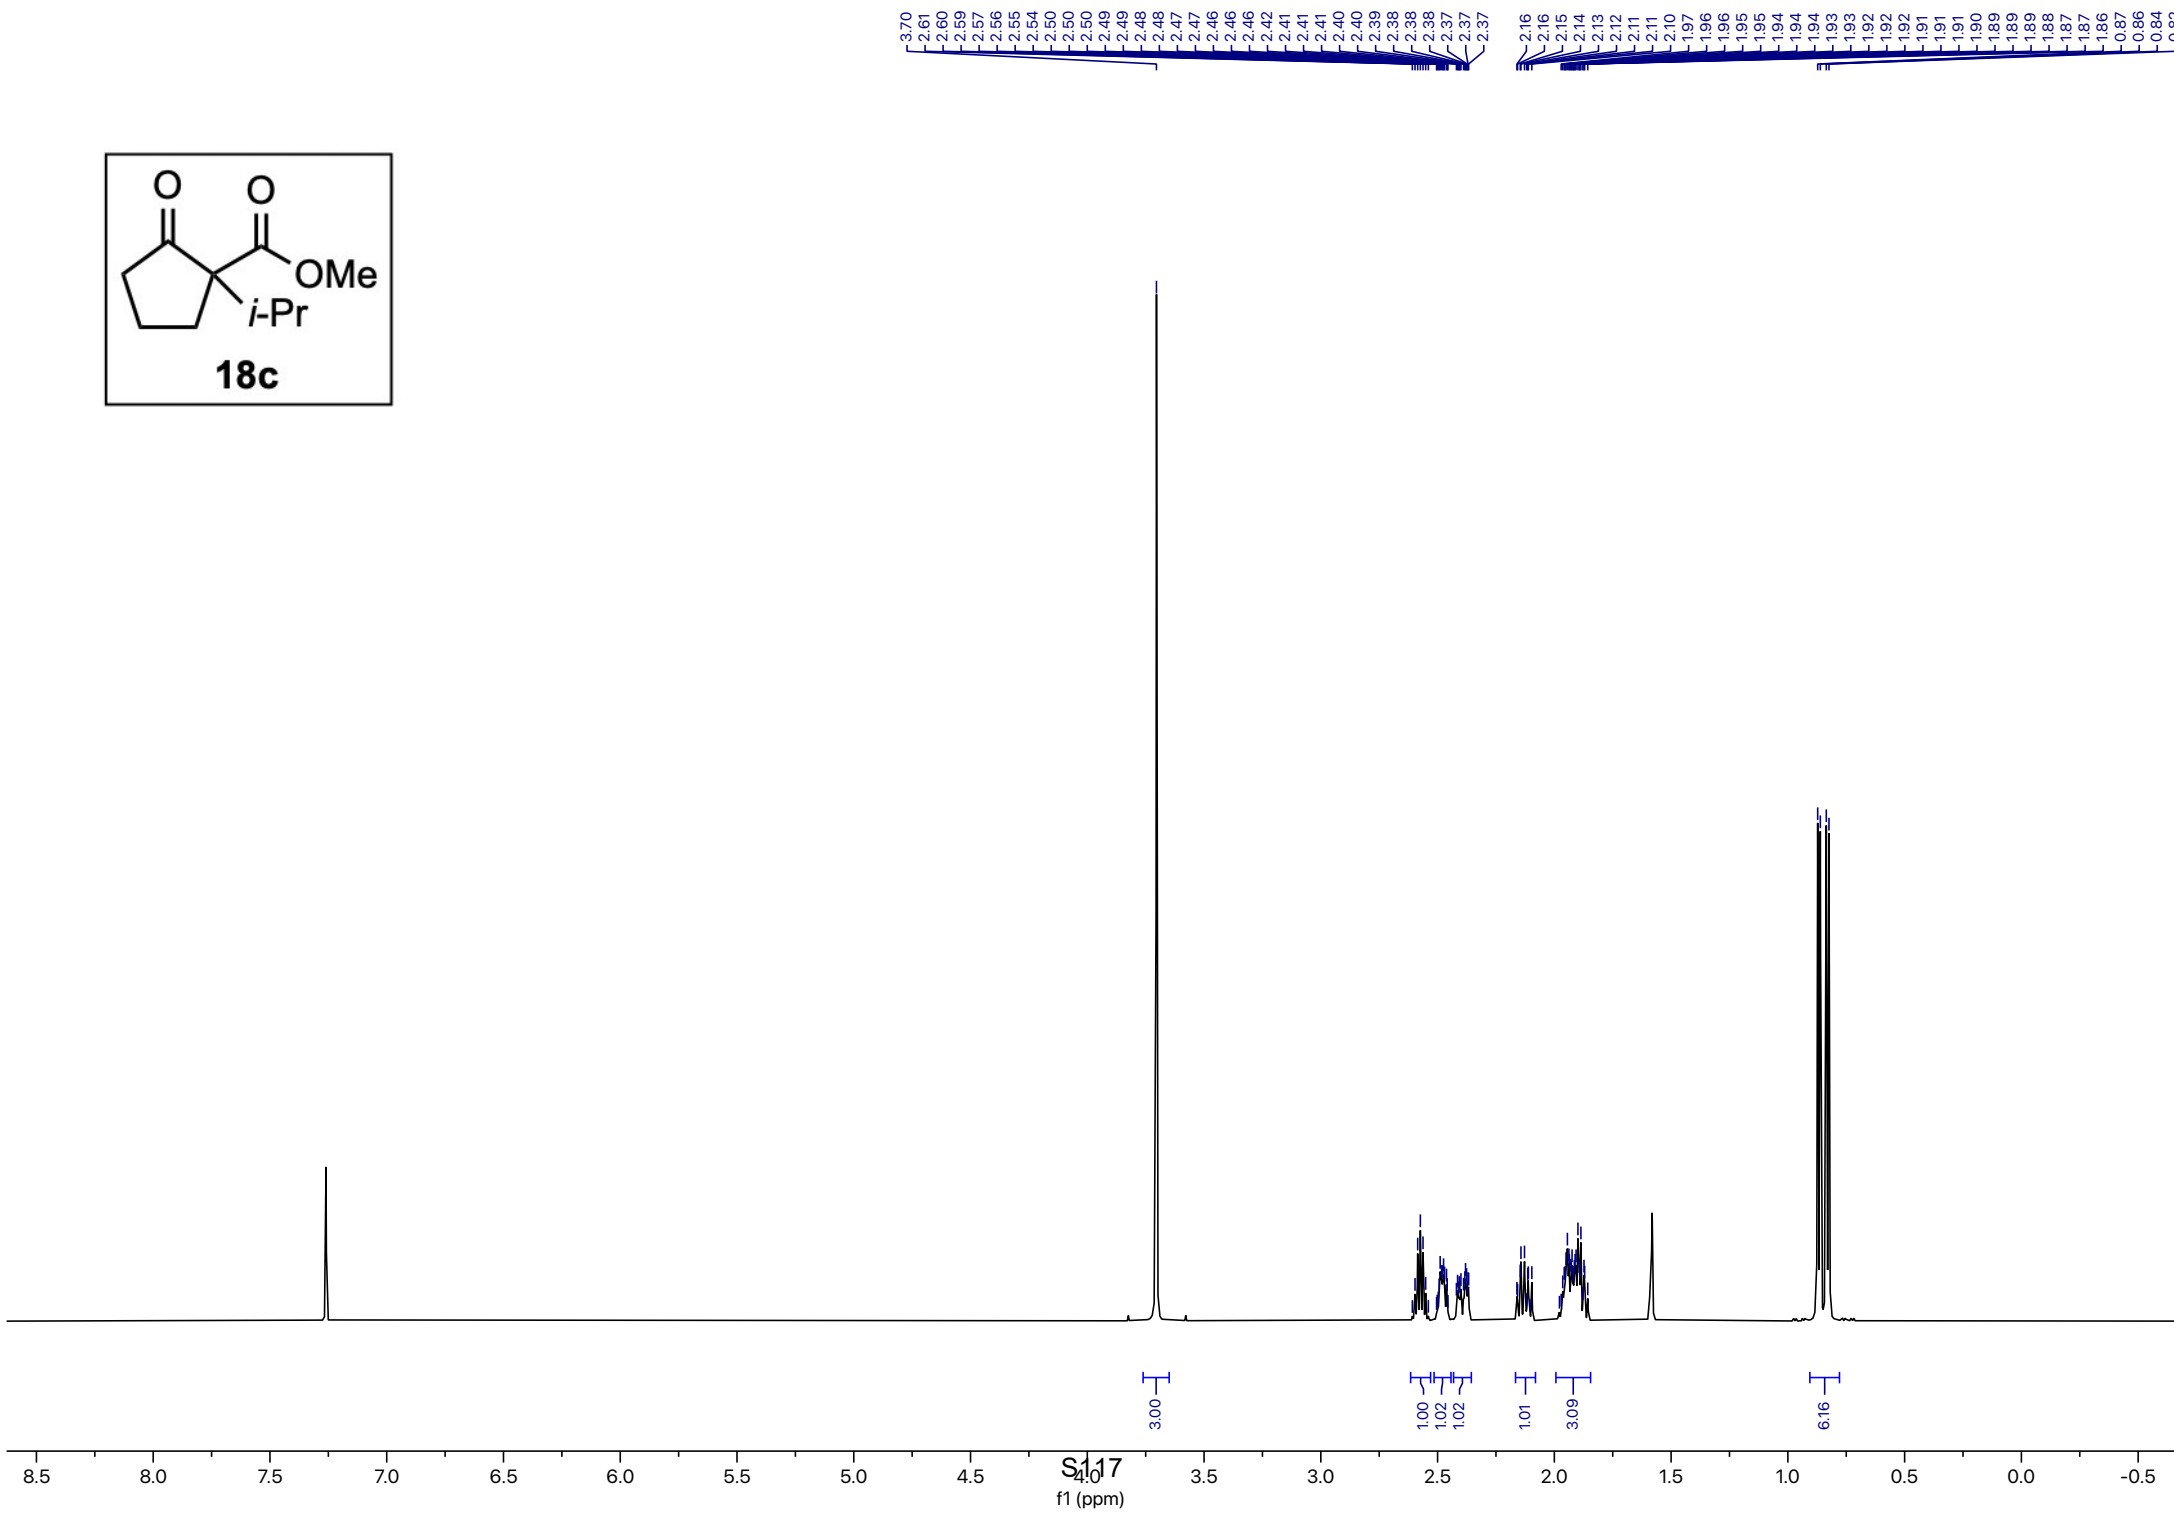

— 215.23

— 171.16

— 65.95

— 52.93

— 39.50

— 32.54

— 27.70

— 20.02  
— 18.88  
— 18.16

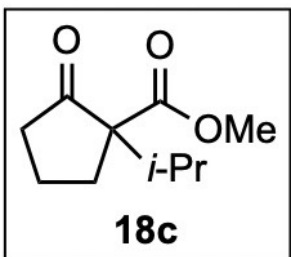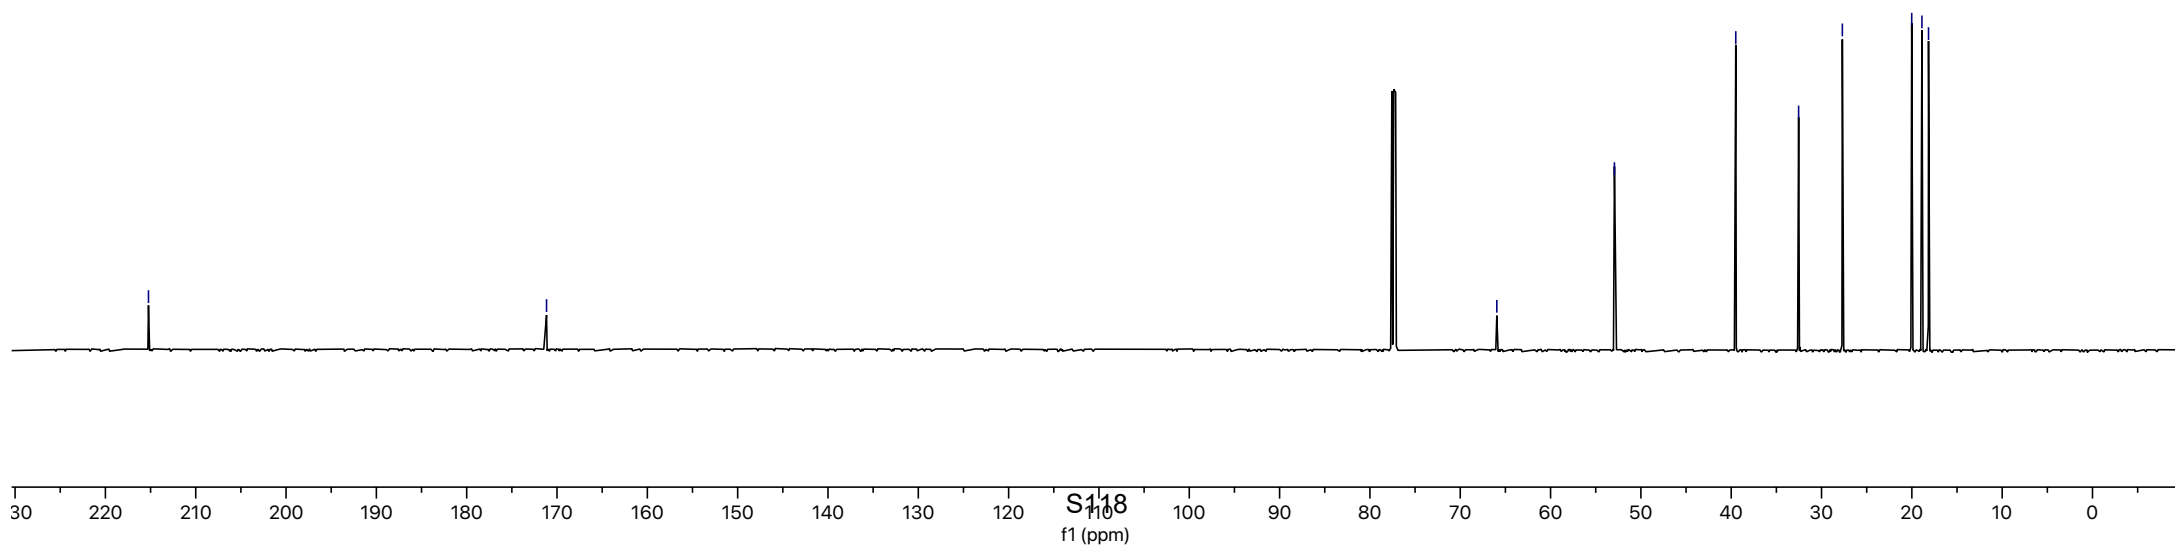

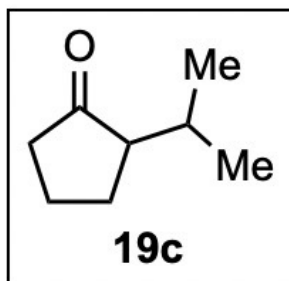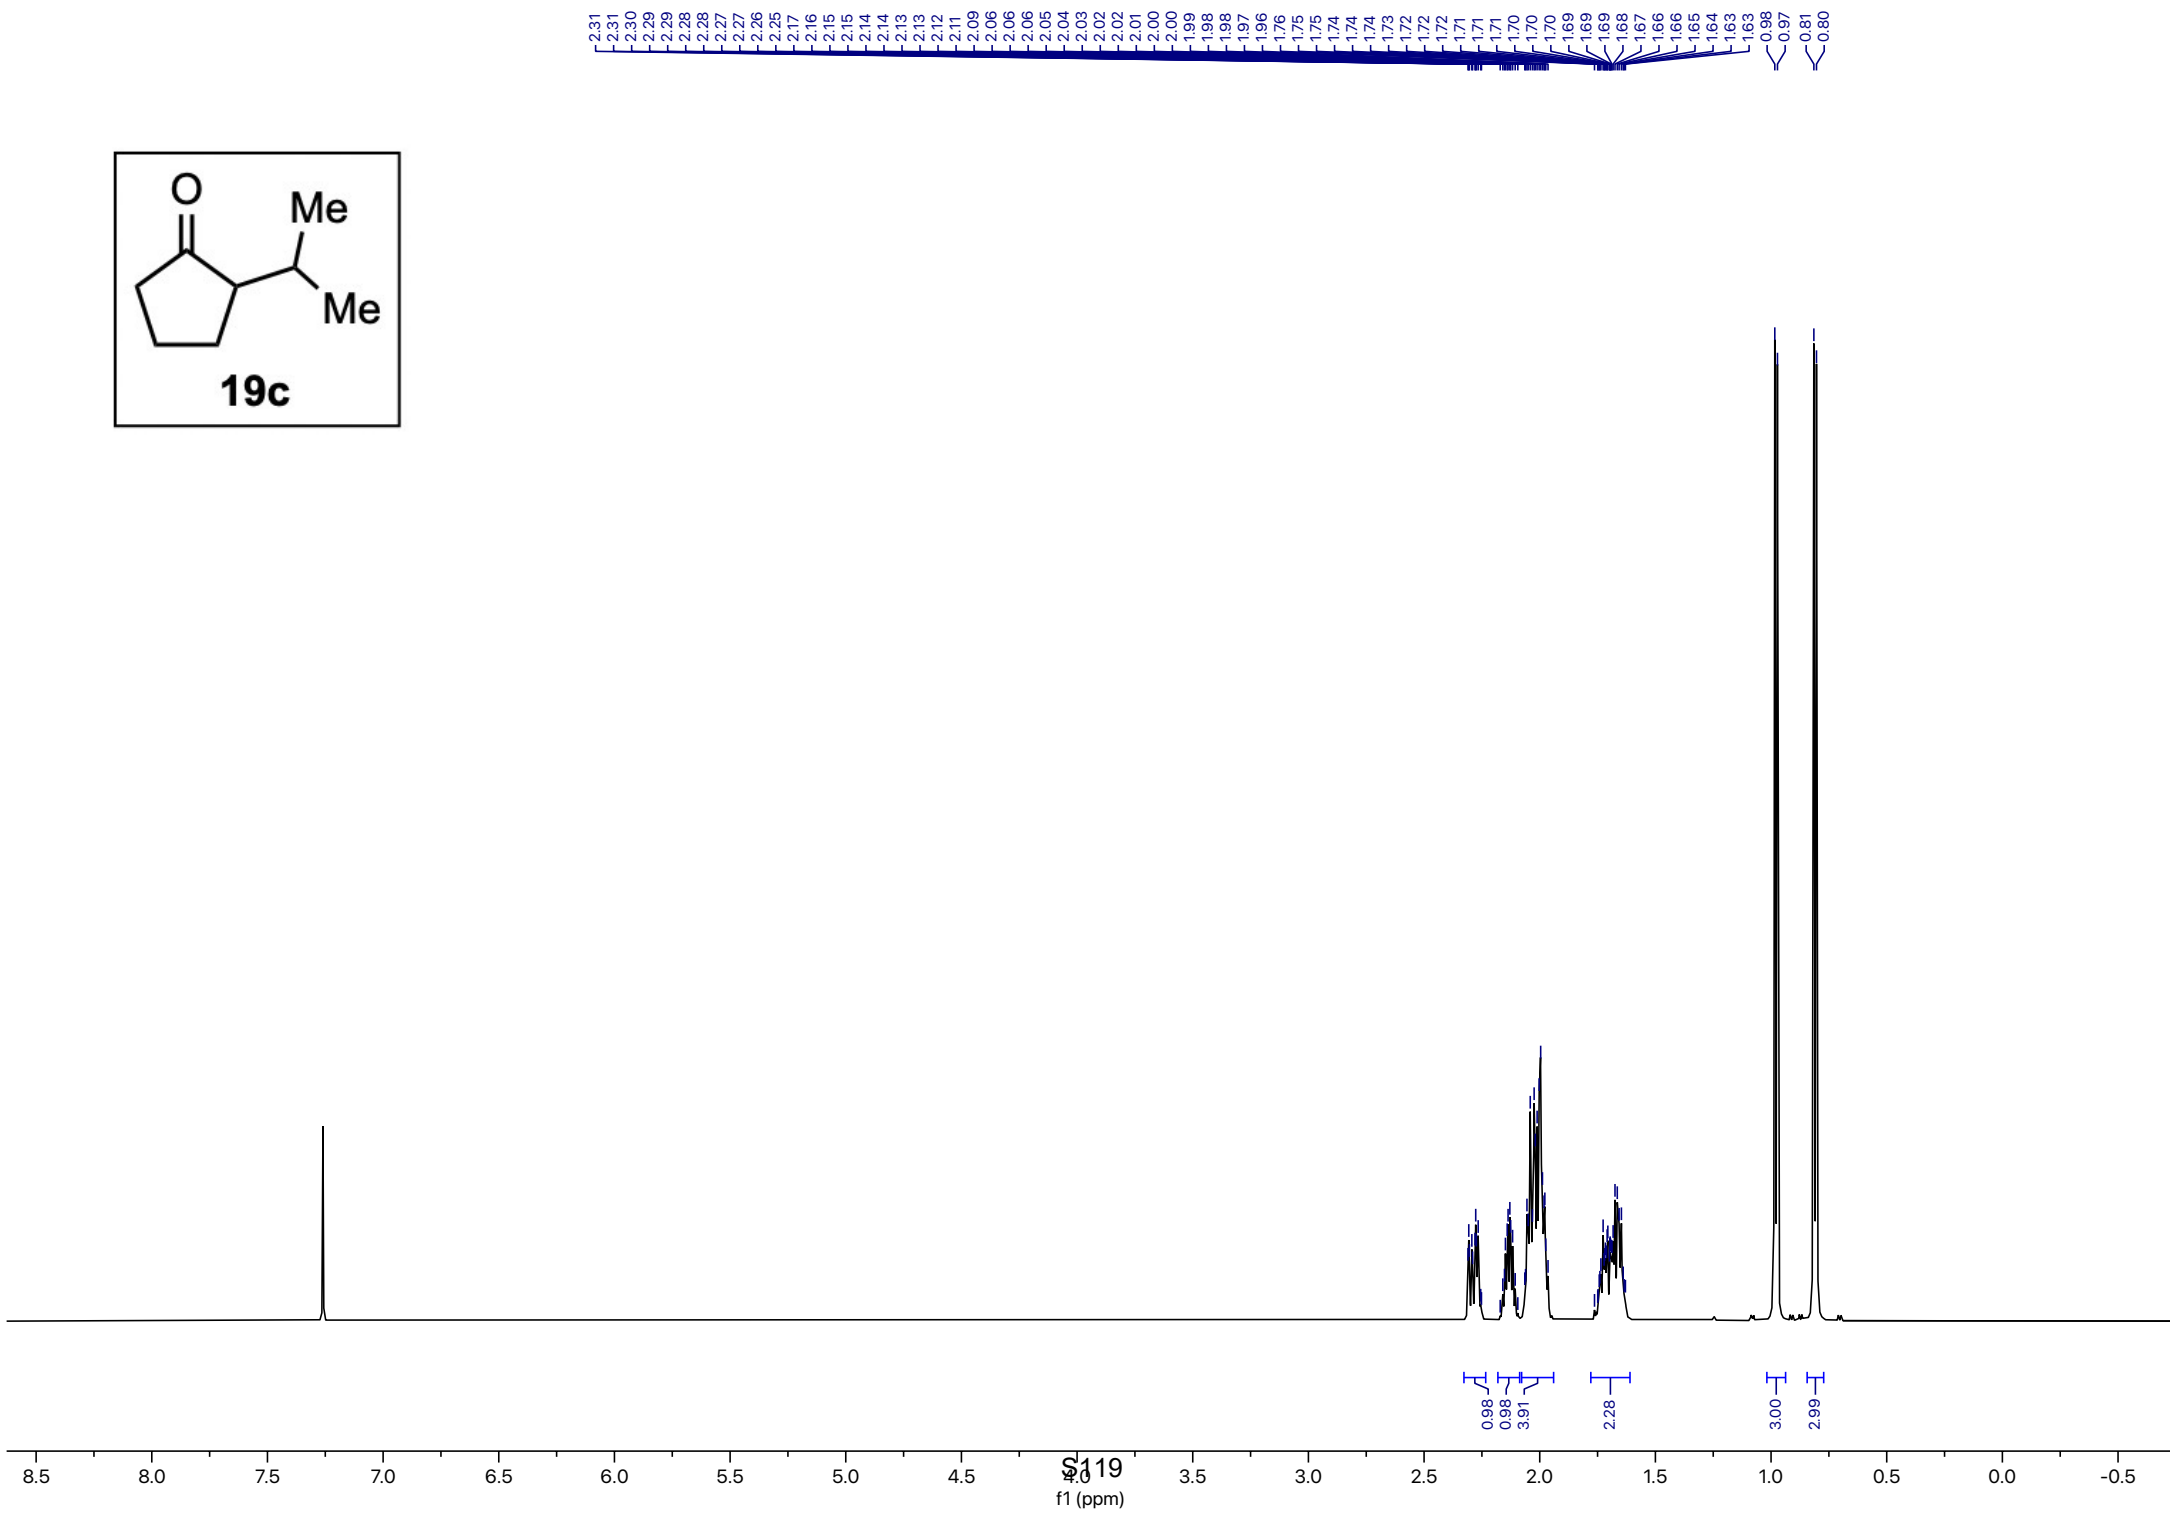



— 221.53

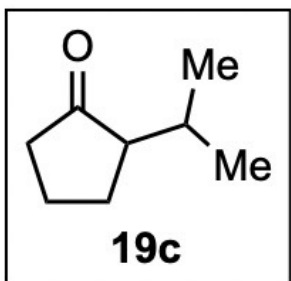

— 55.41

— 39.54

— 27.70

— 24.95

— 21.45

— 20.94

— 18.72

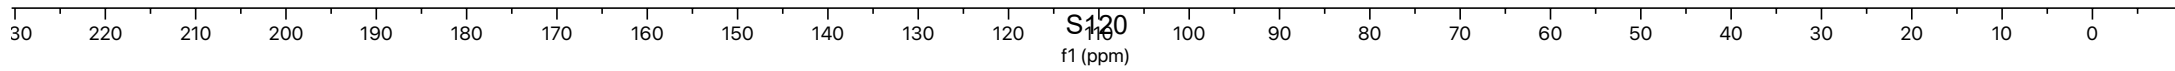

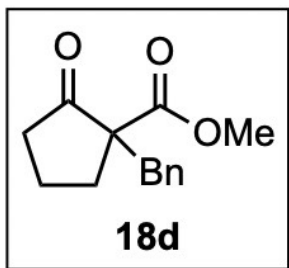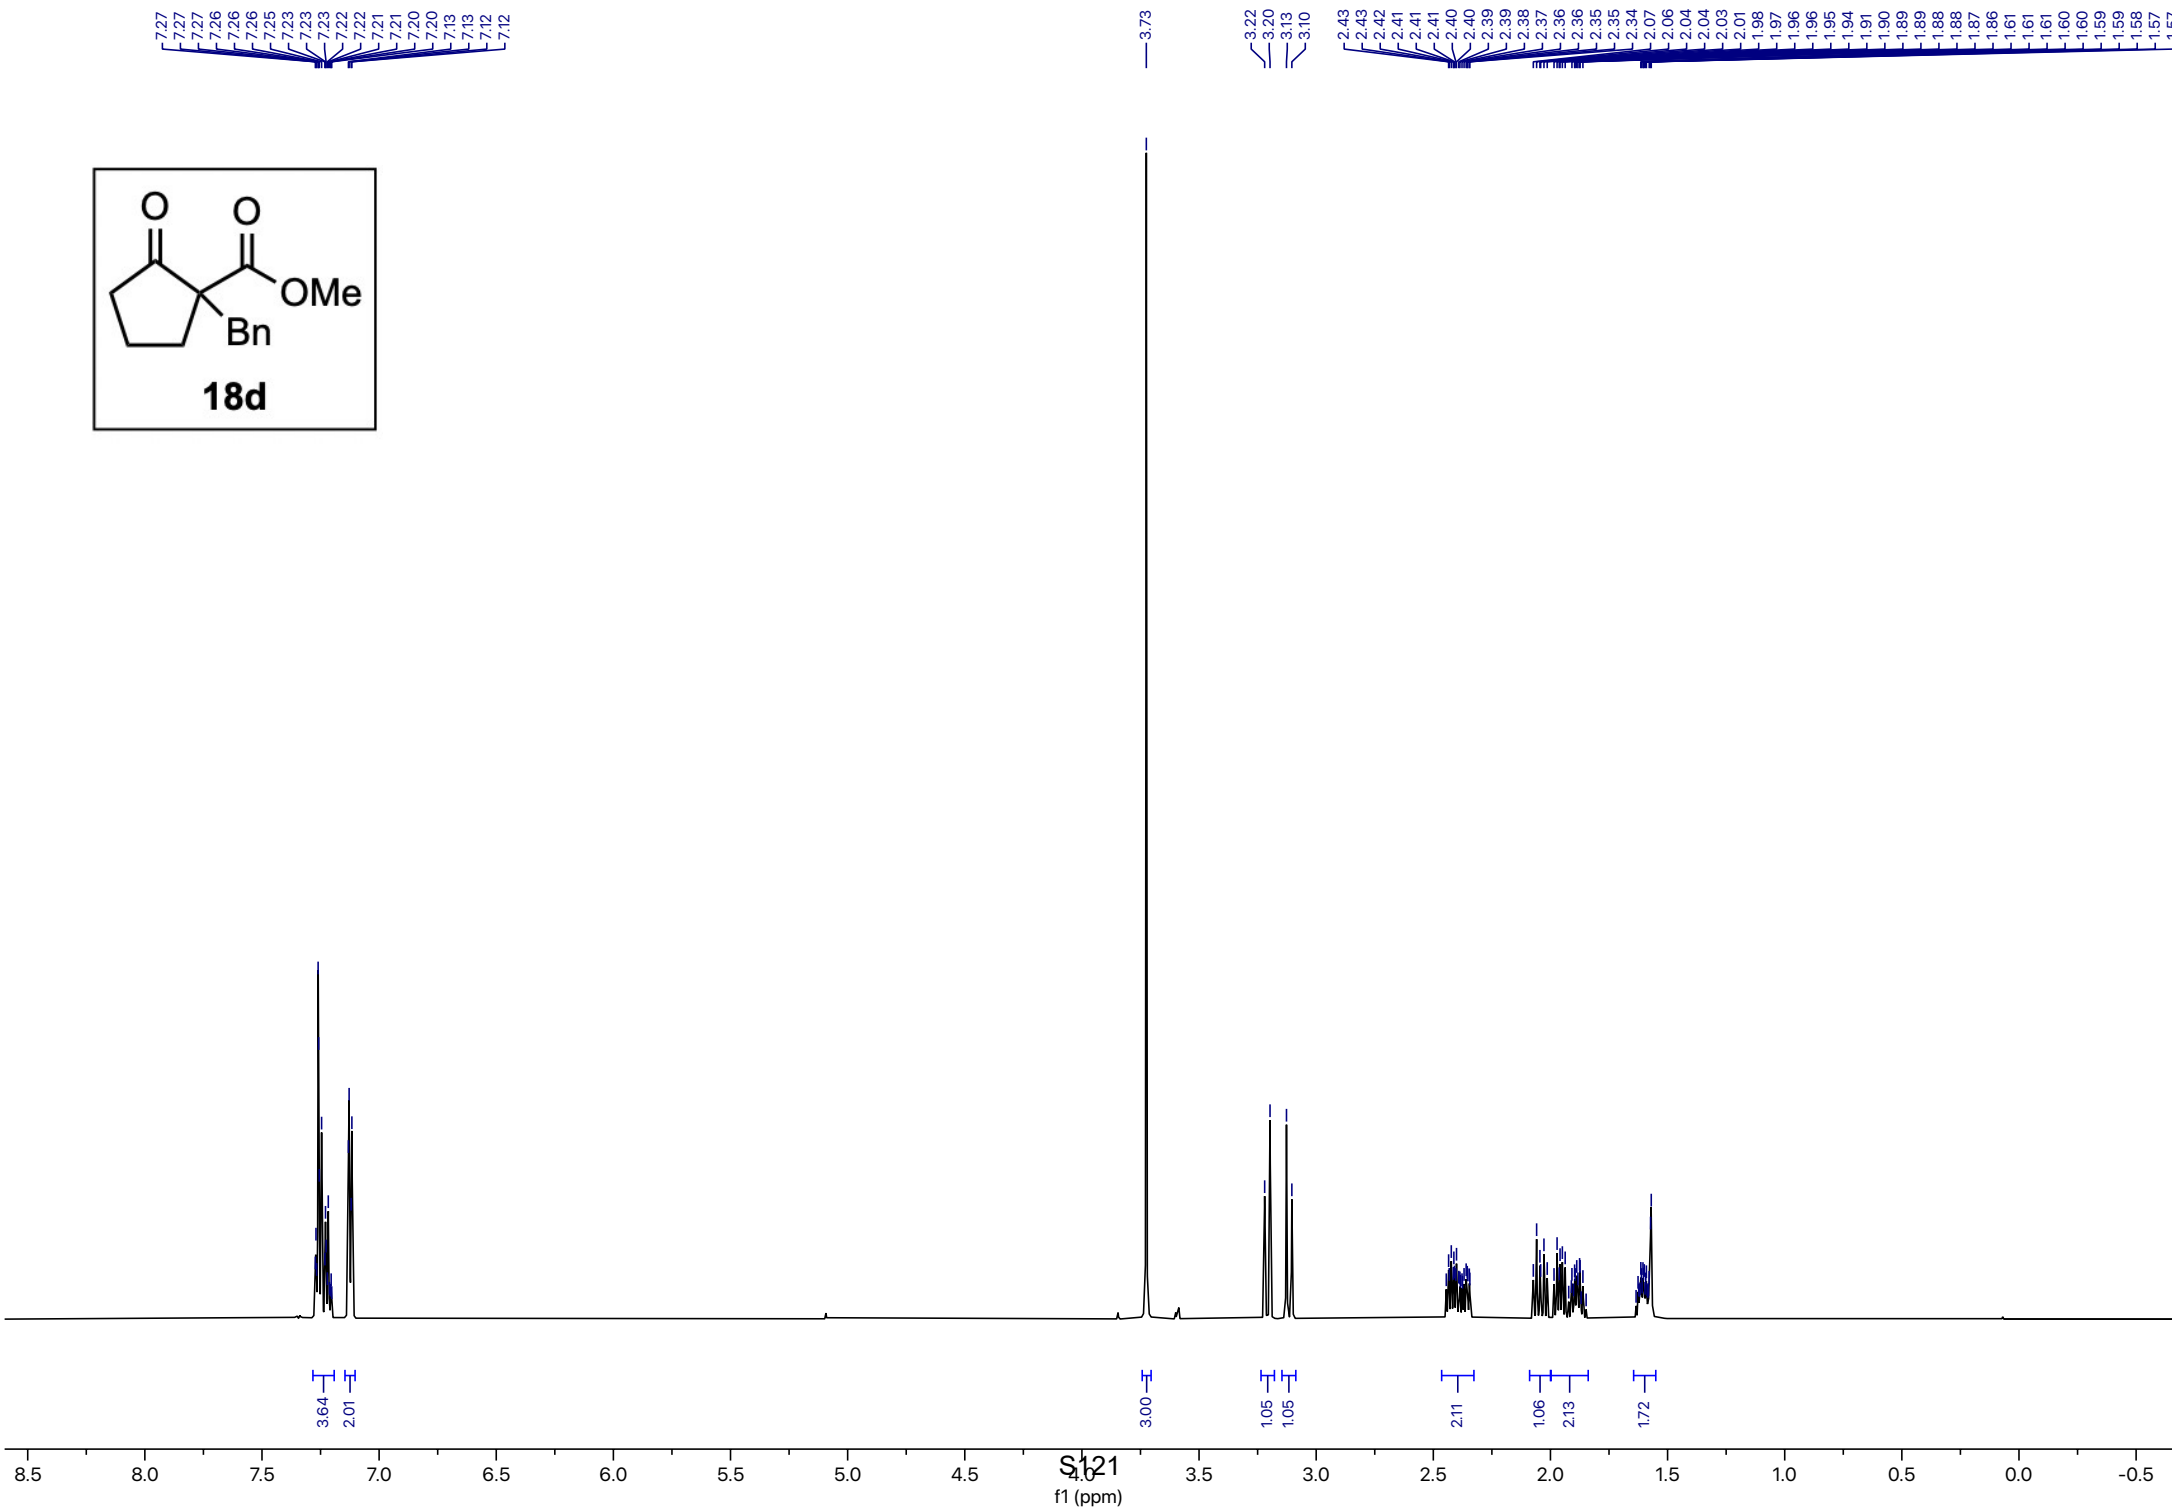

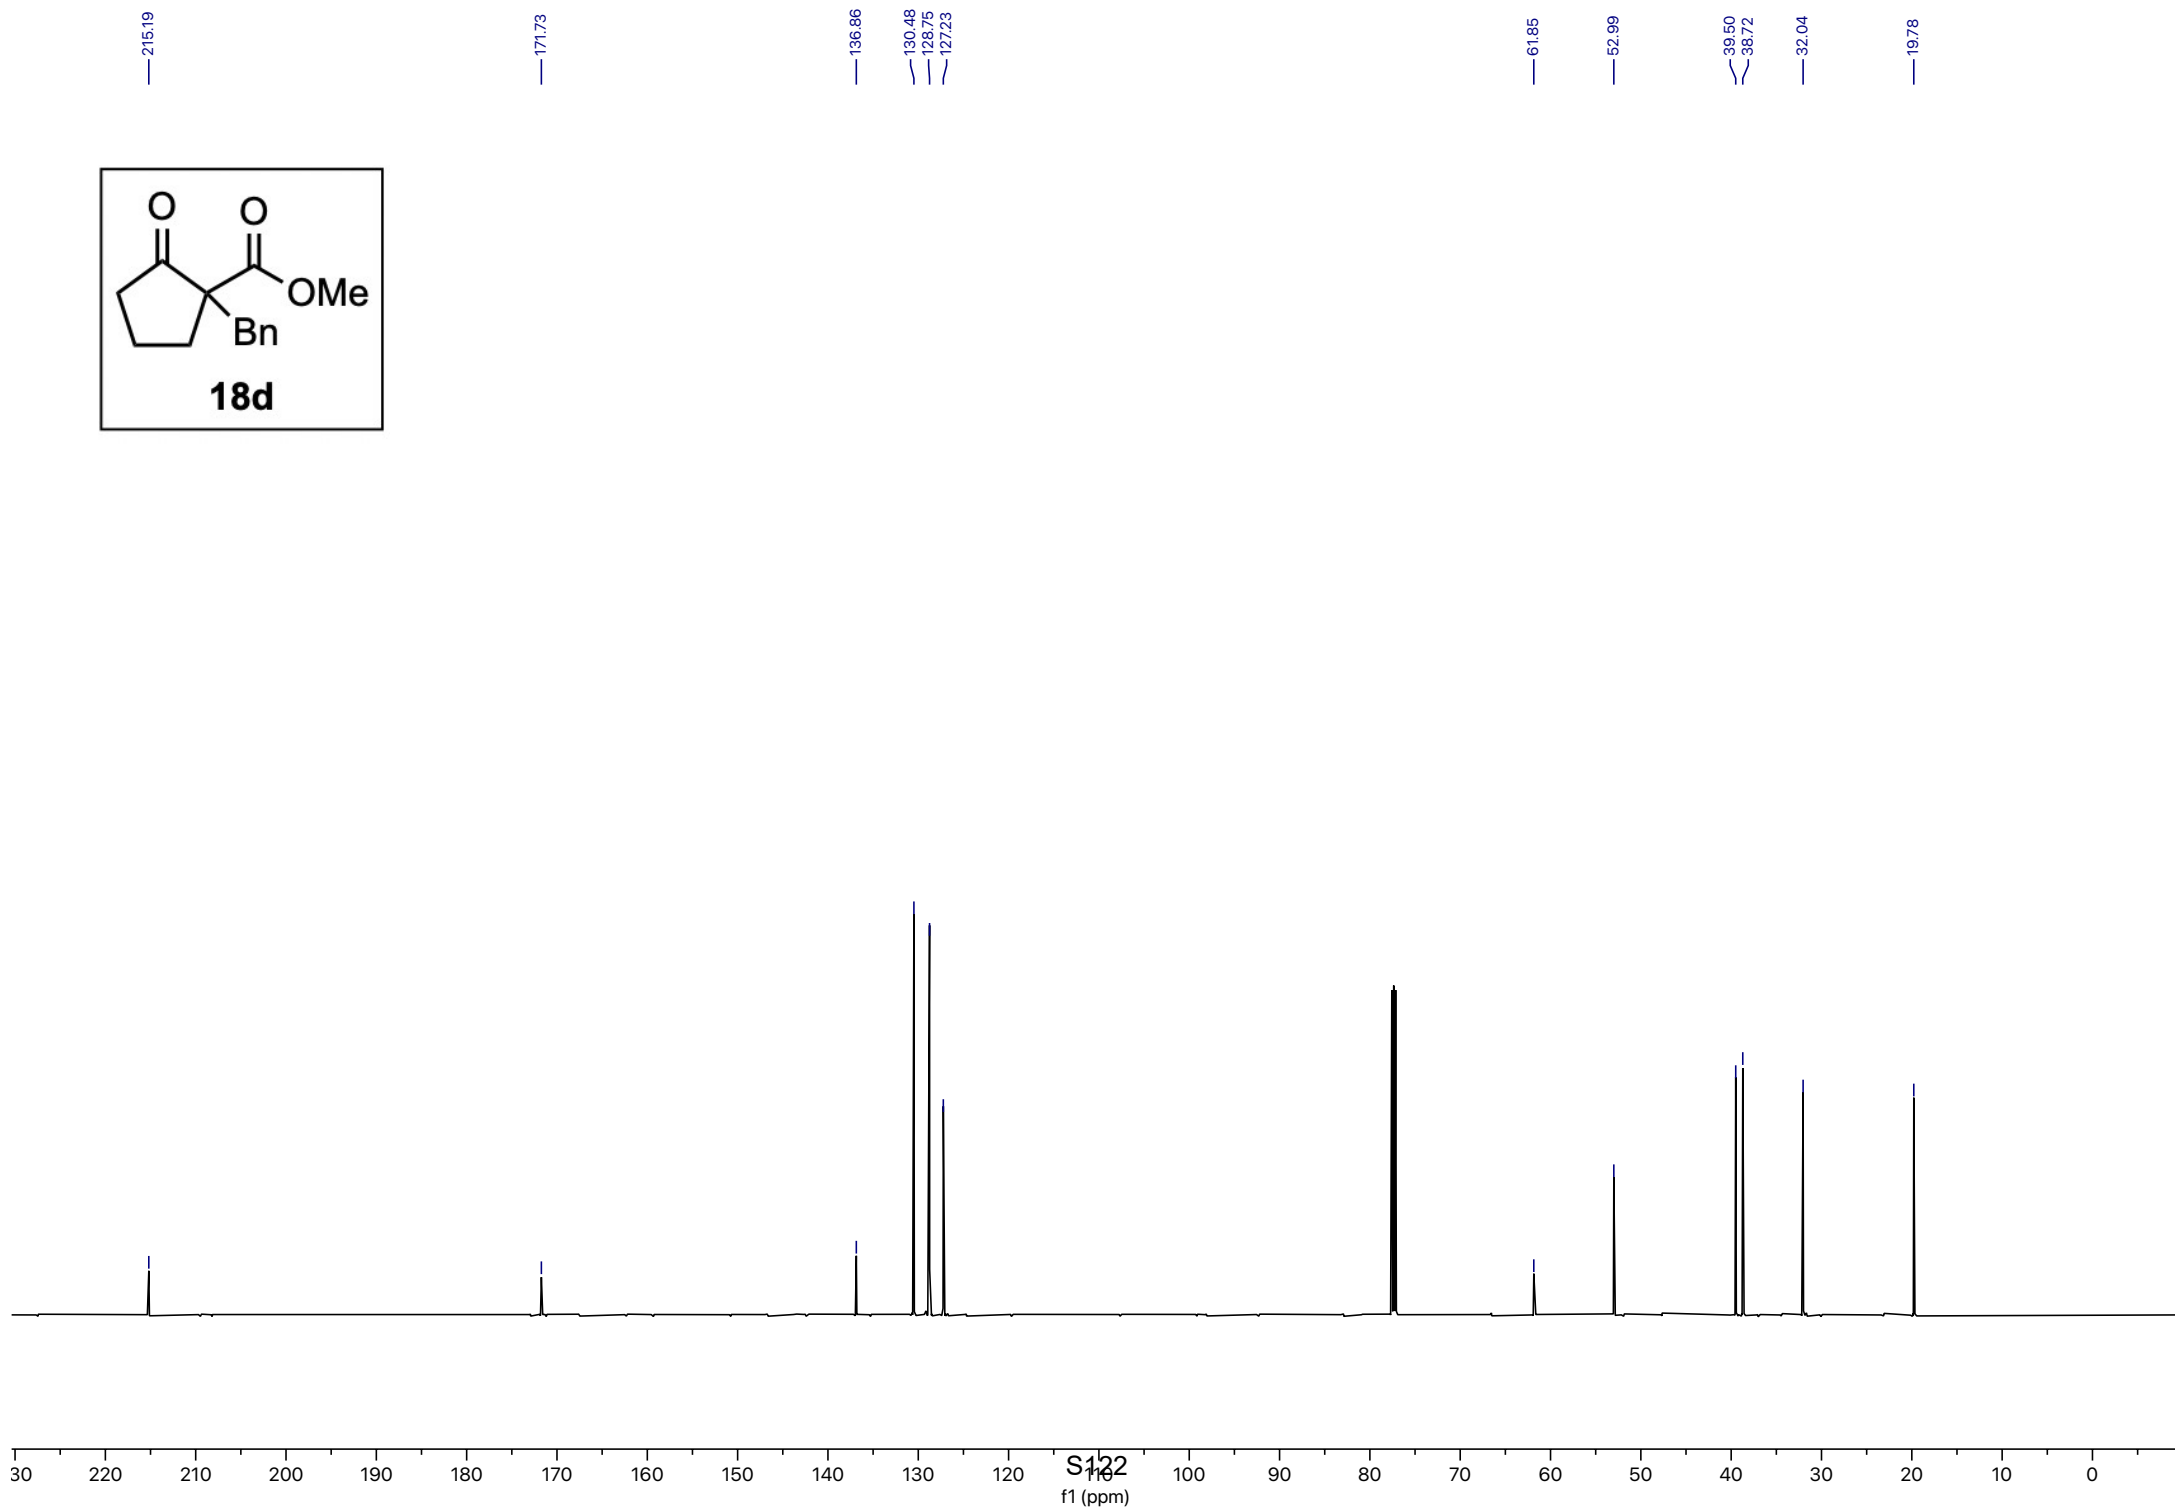

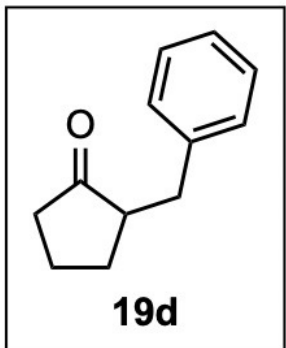

7.29  
7.28  
7.27  
7.26  
7.21  
7.21  
7.20  
7.19  
7.17  
7.16

3.17  
3.16  
3.14  
3.14  
2.56  
2.54  
2.54  
2.52  
2.38  
2.38  
2.37  
2.37  
2.37  
2.36  
2.36  
2.36  
2.35  
2.35  
2.34  
2.34  
2.34  
2.33  
2.33  
2.32  
2.32  
2.32  
2.32  
2.31

2.14  
2.12  
2.12  
2.11  
2.09  
2.09  
2.08  
2.08  
2.07  
2.07  
1.97  
1.96  
1.96  
1.95  
1.95  
1.94  
1.94  
1.93  
1.76  
1.74  
1.74  
1.74  
1.73  
1.73  
1.73  
1.72  
1.72  
1.59  
1.58  
1.57  
1.57  
1.56  
1.56  
1.55  
1.55  
1.54  
1.54

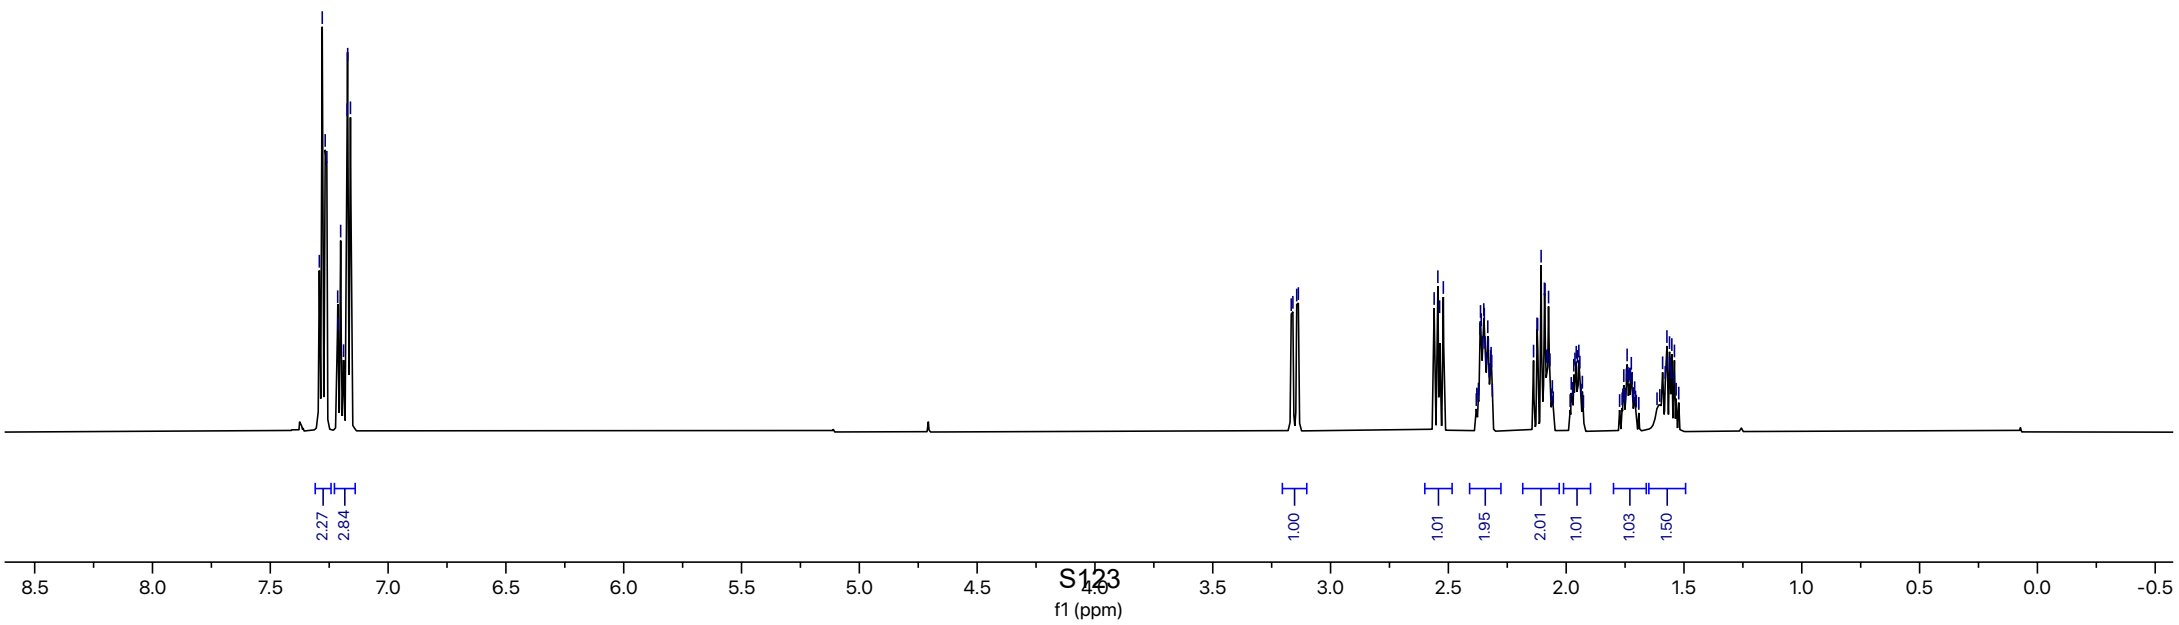

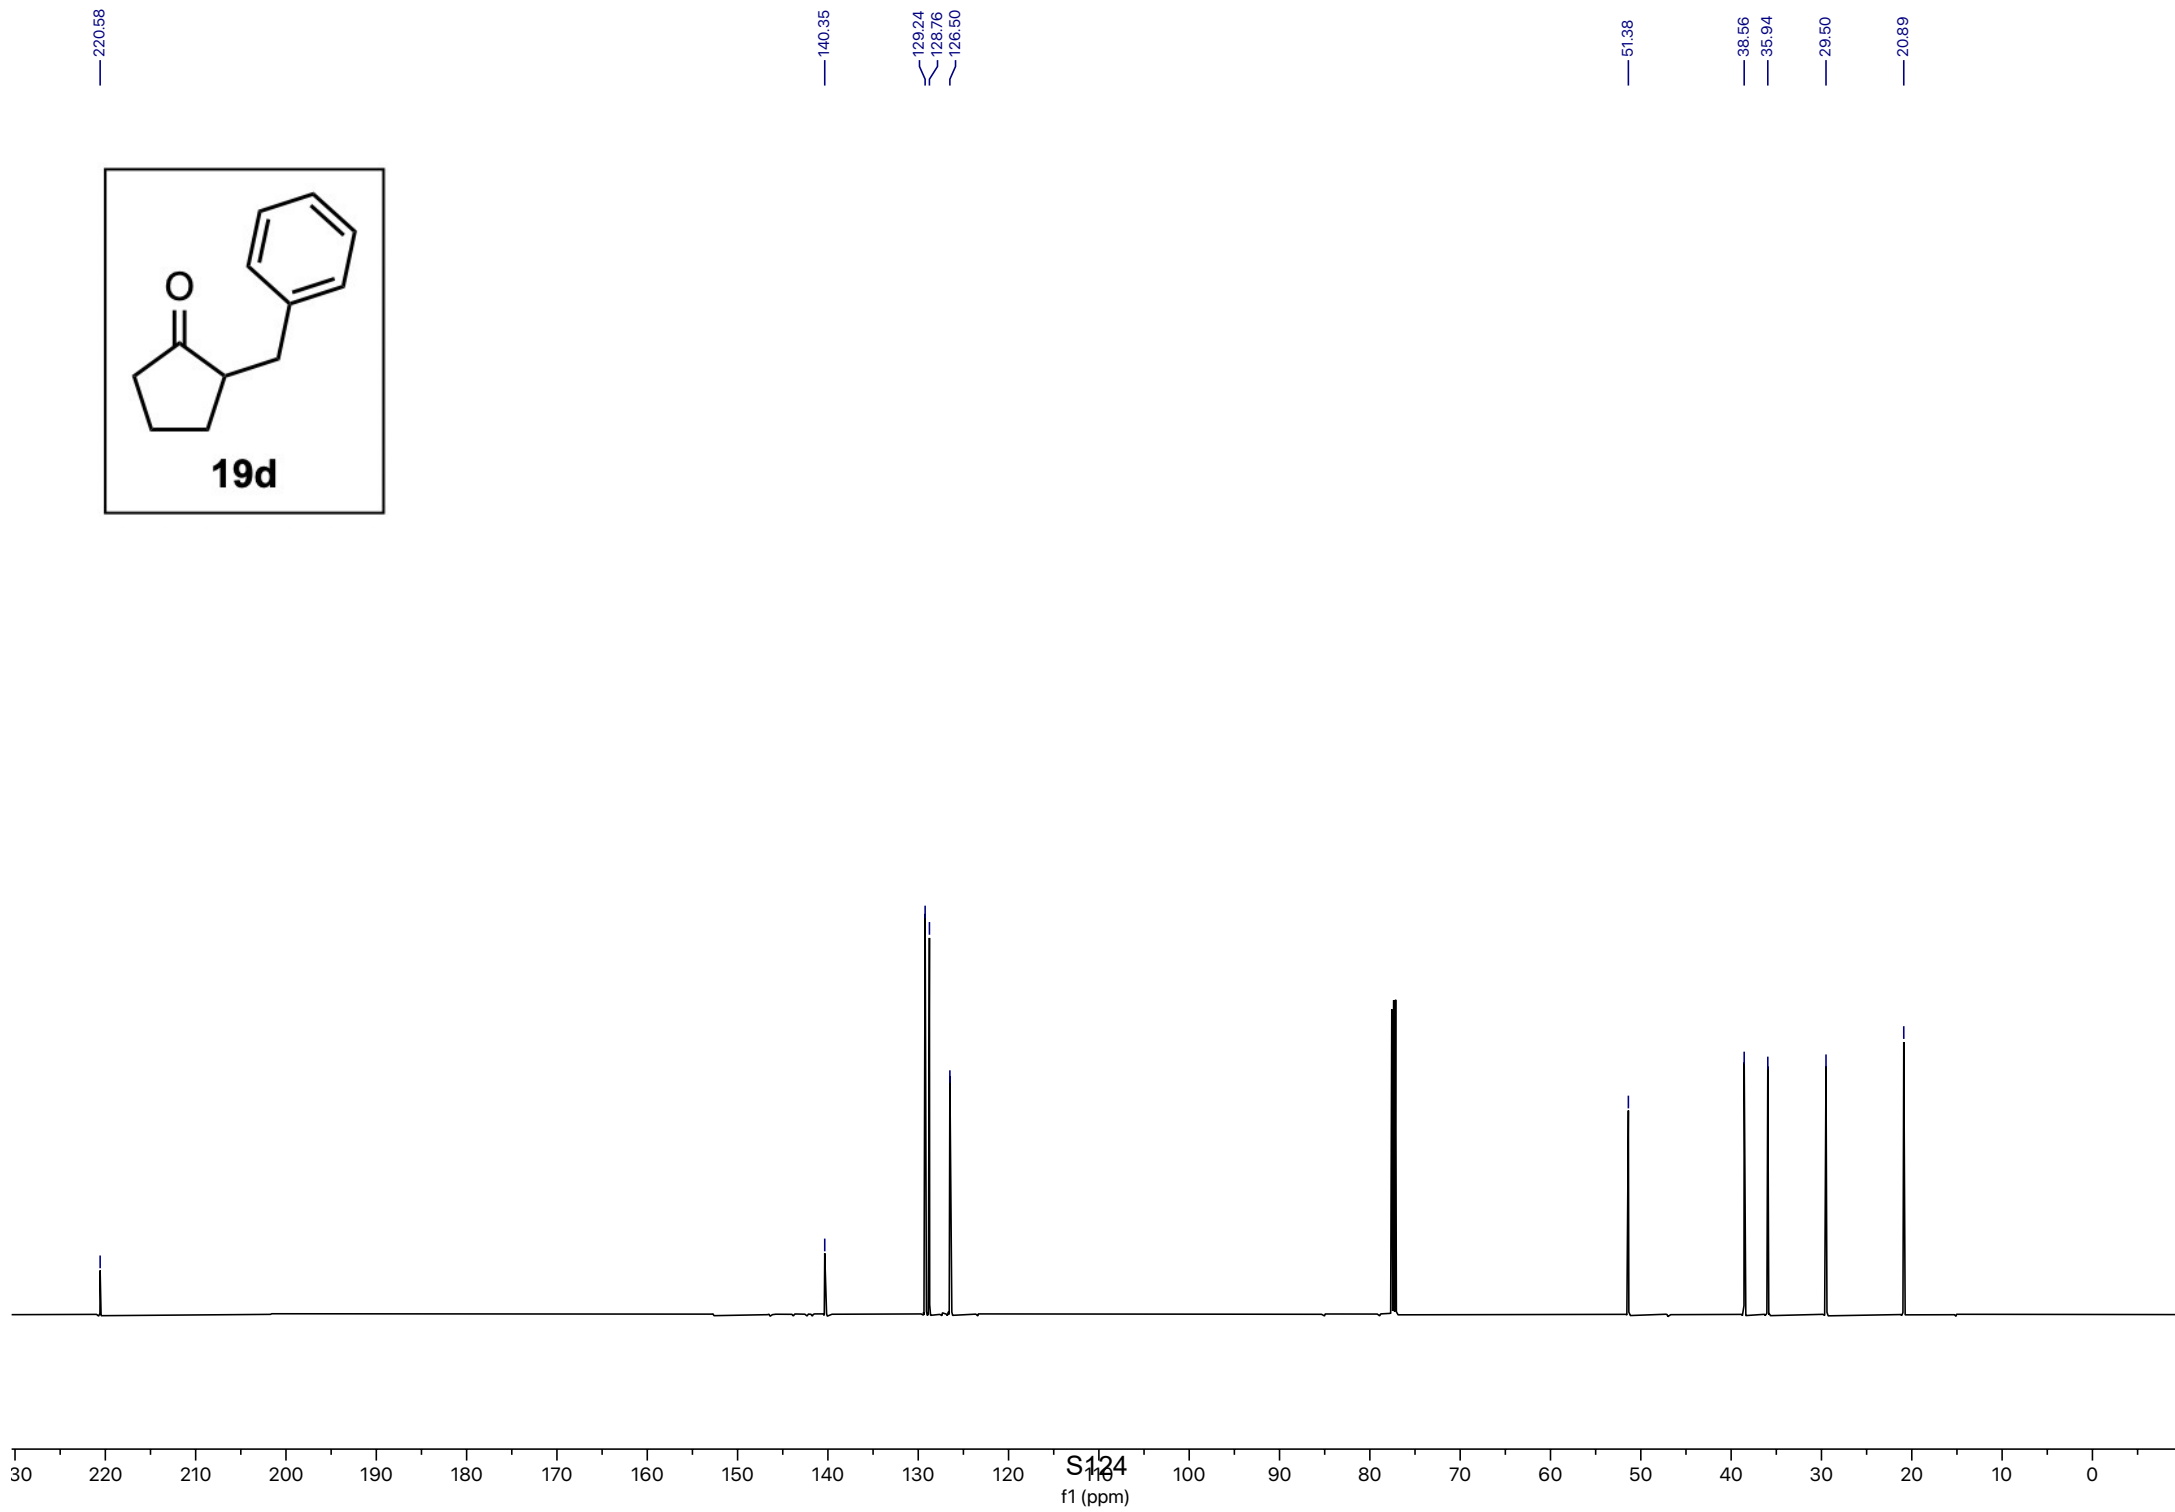

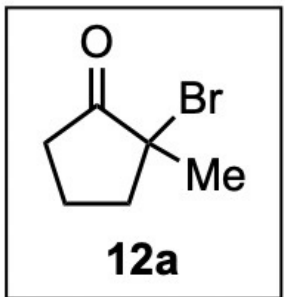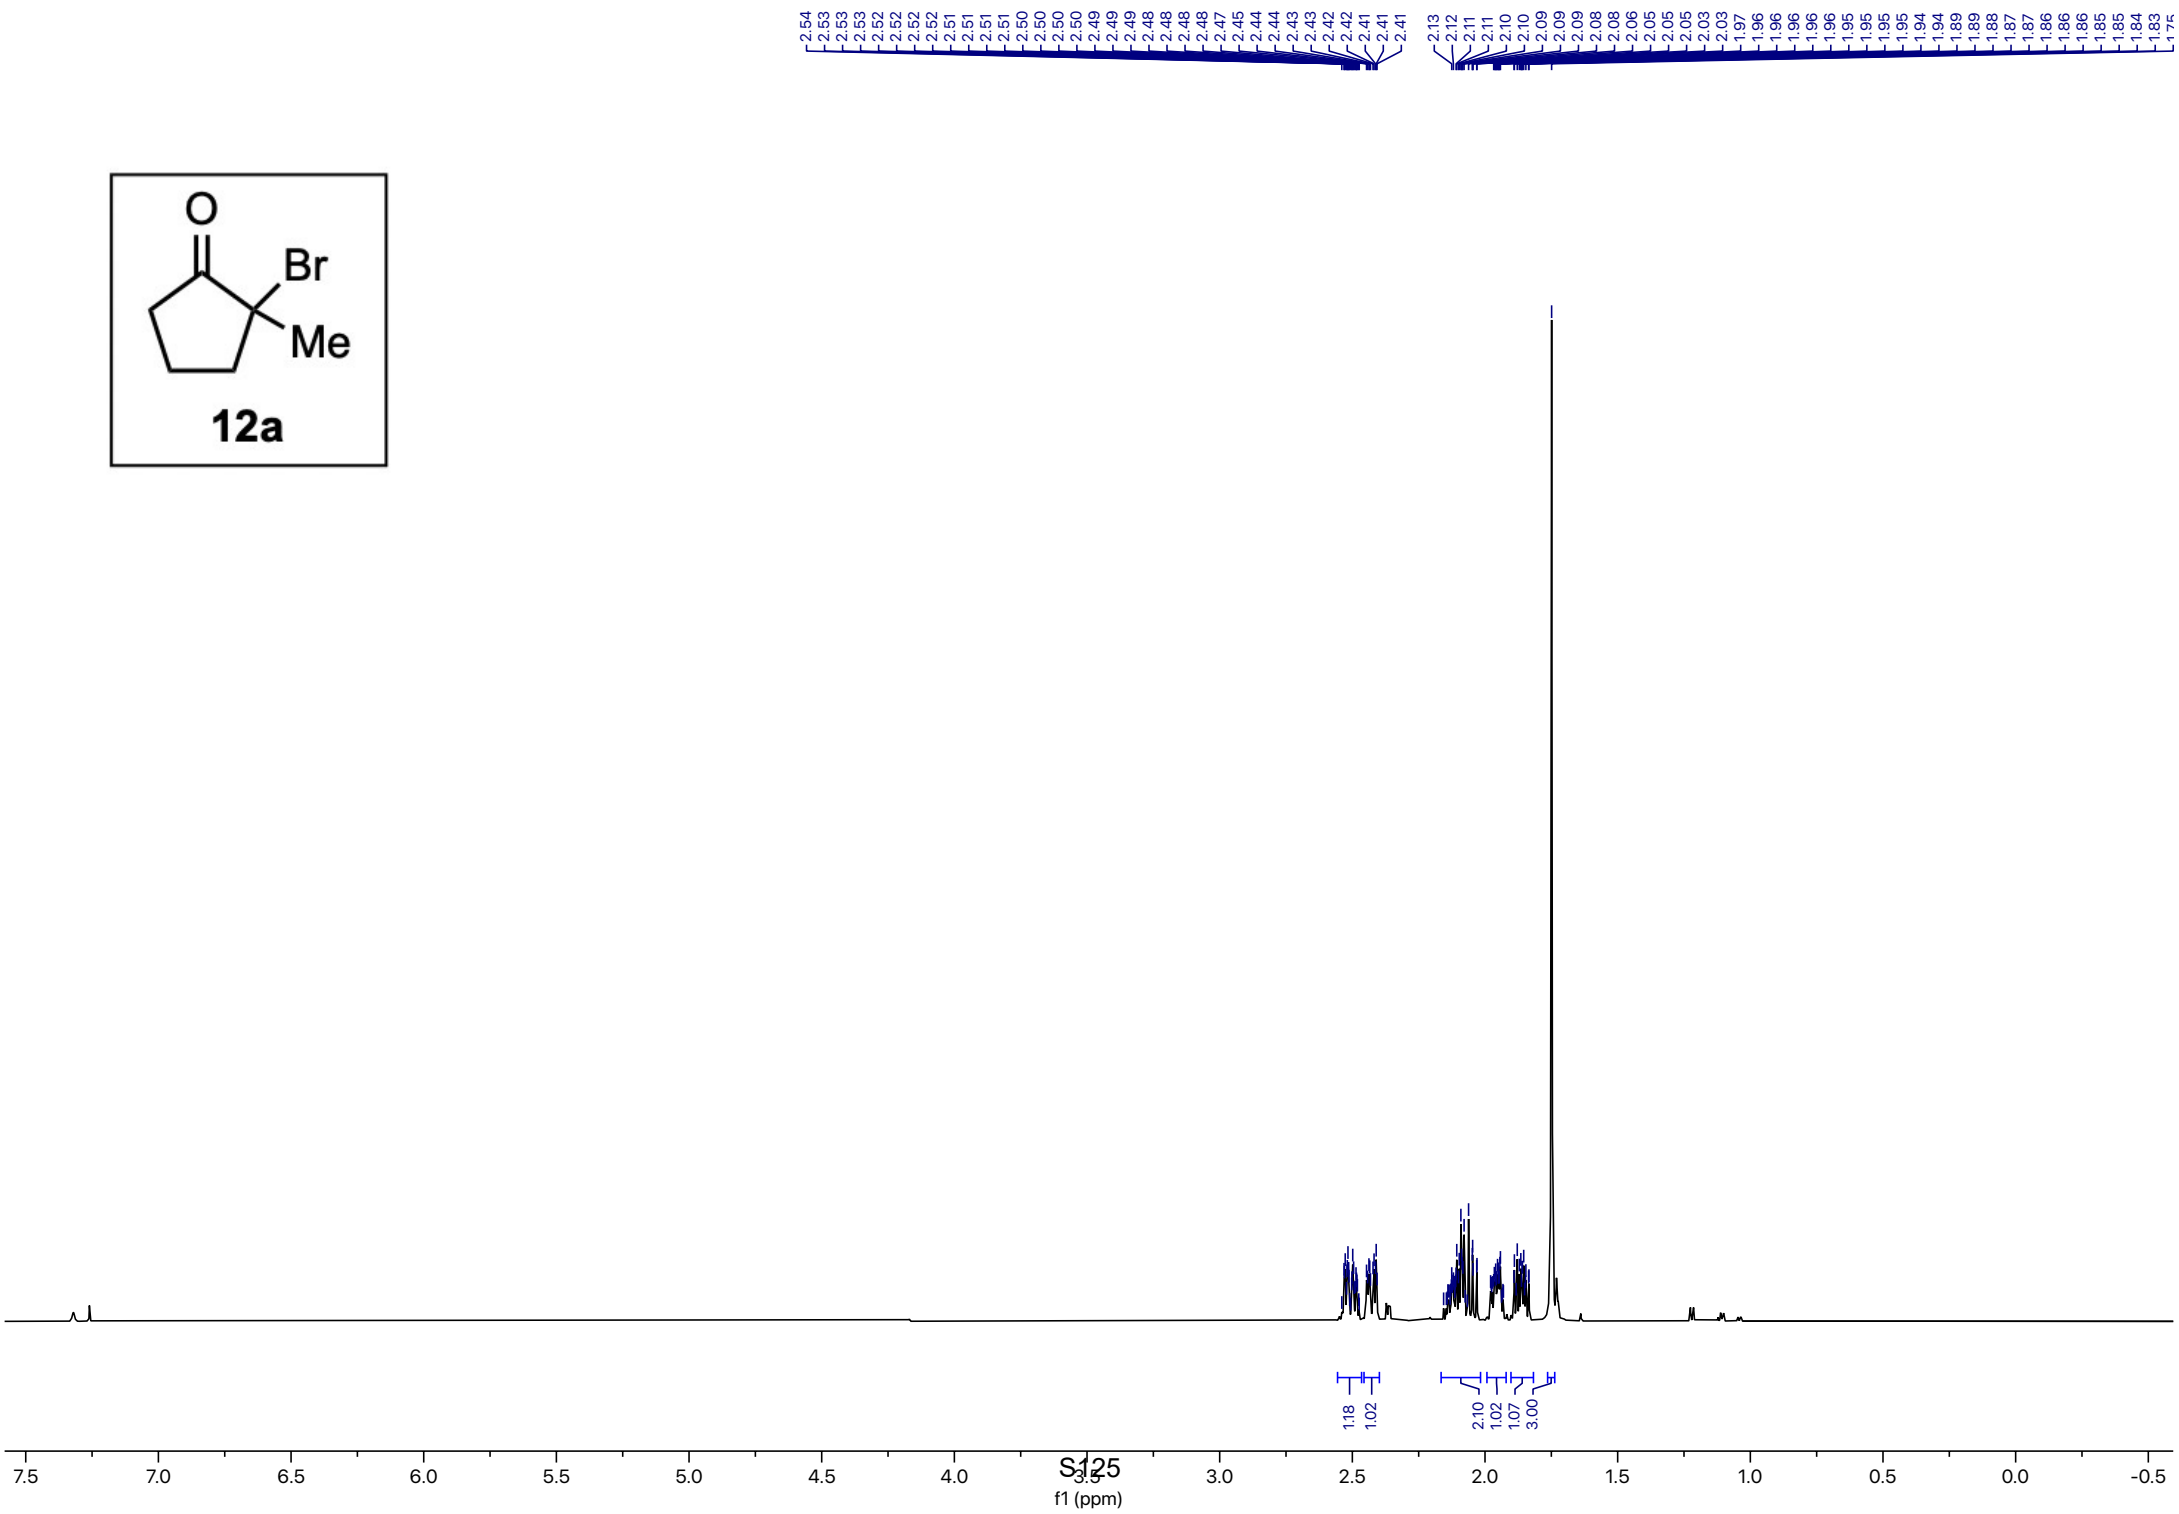

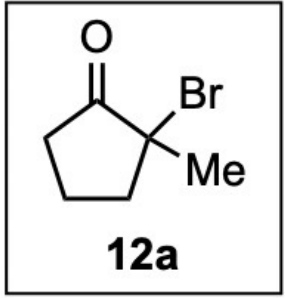

210.84

64.47

41.51

34.44

25.02

18.87

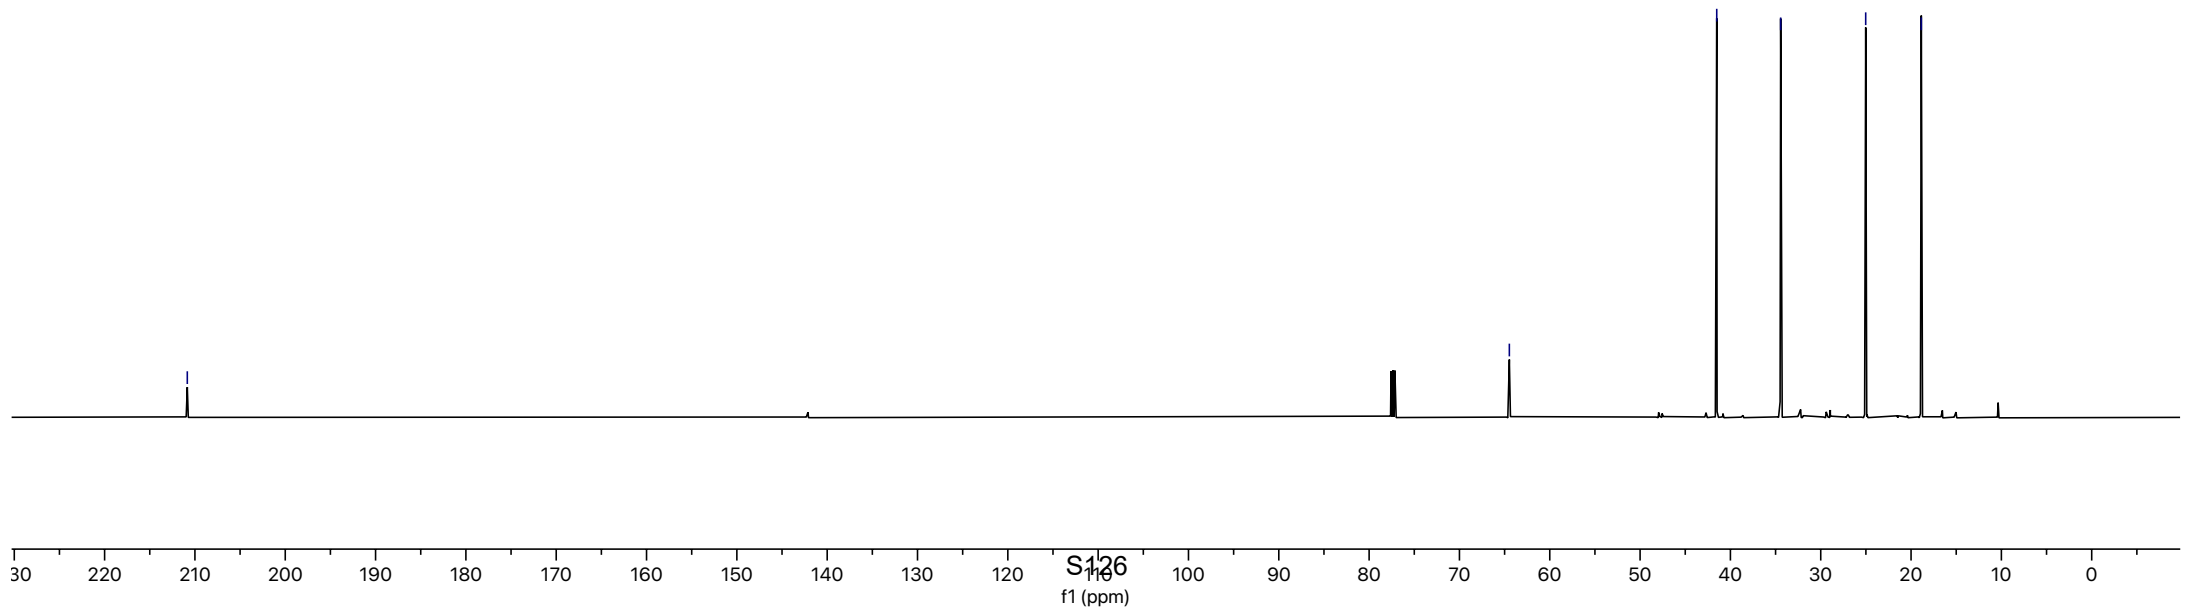

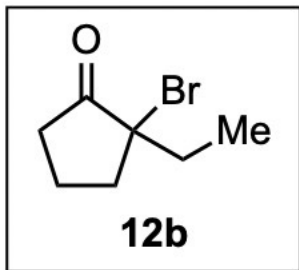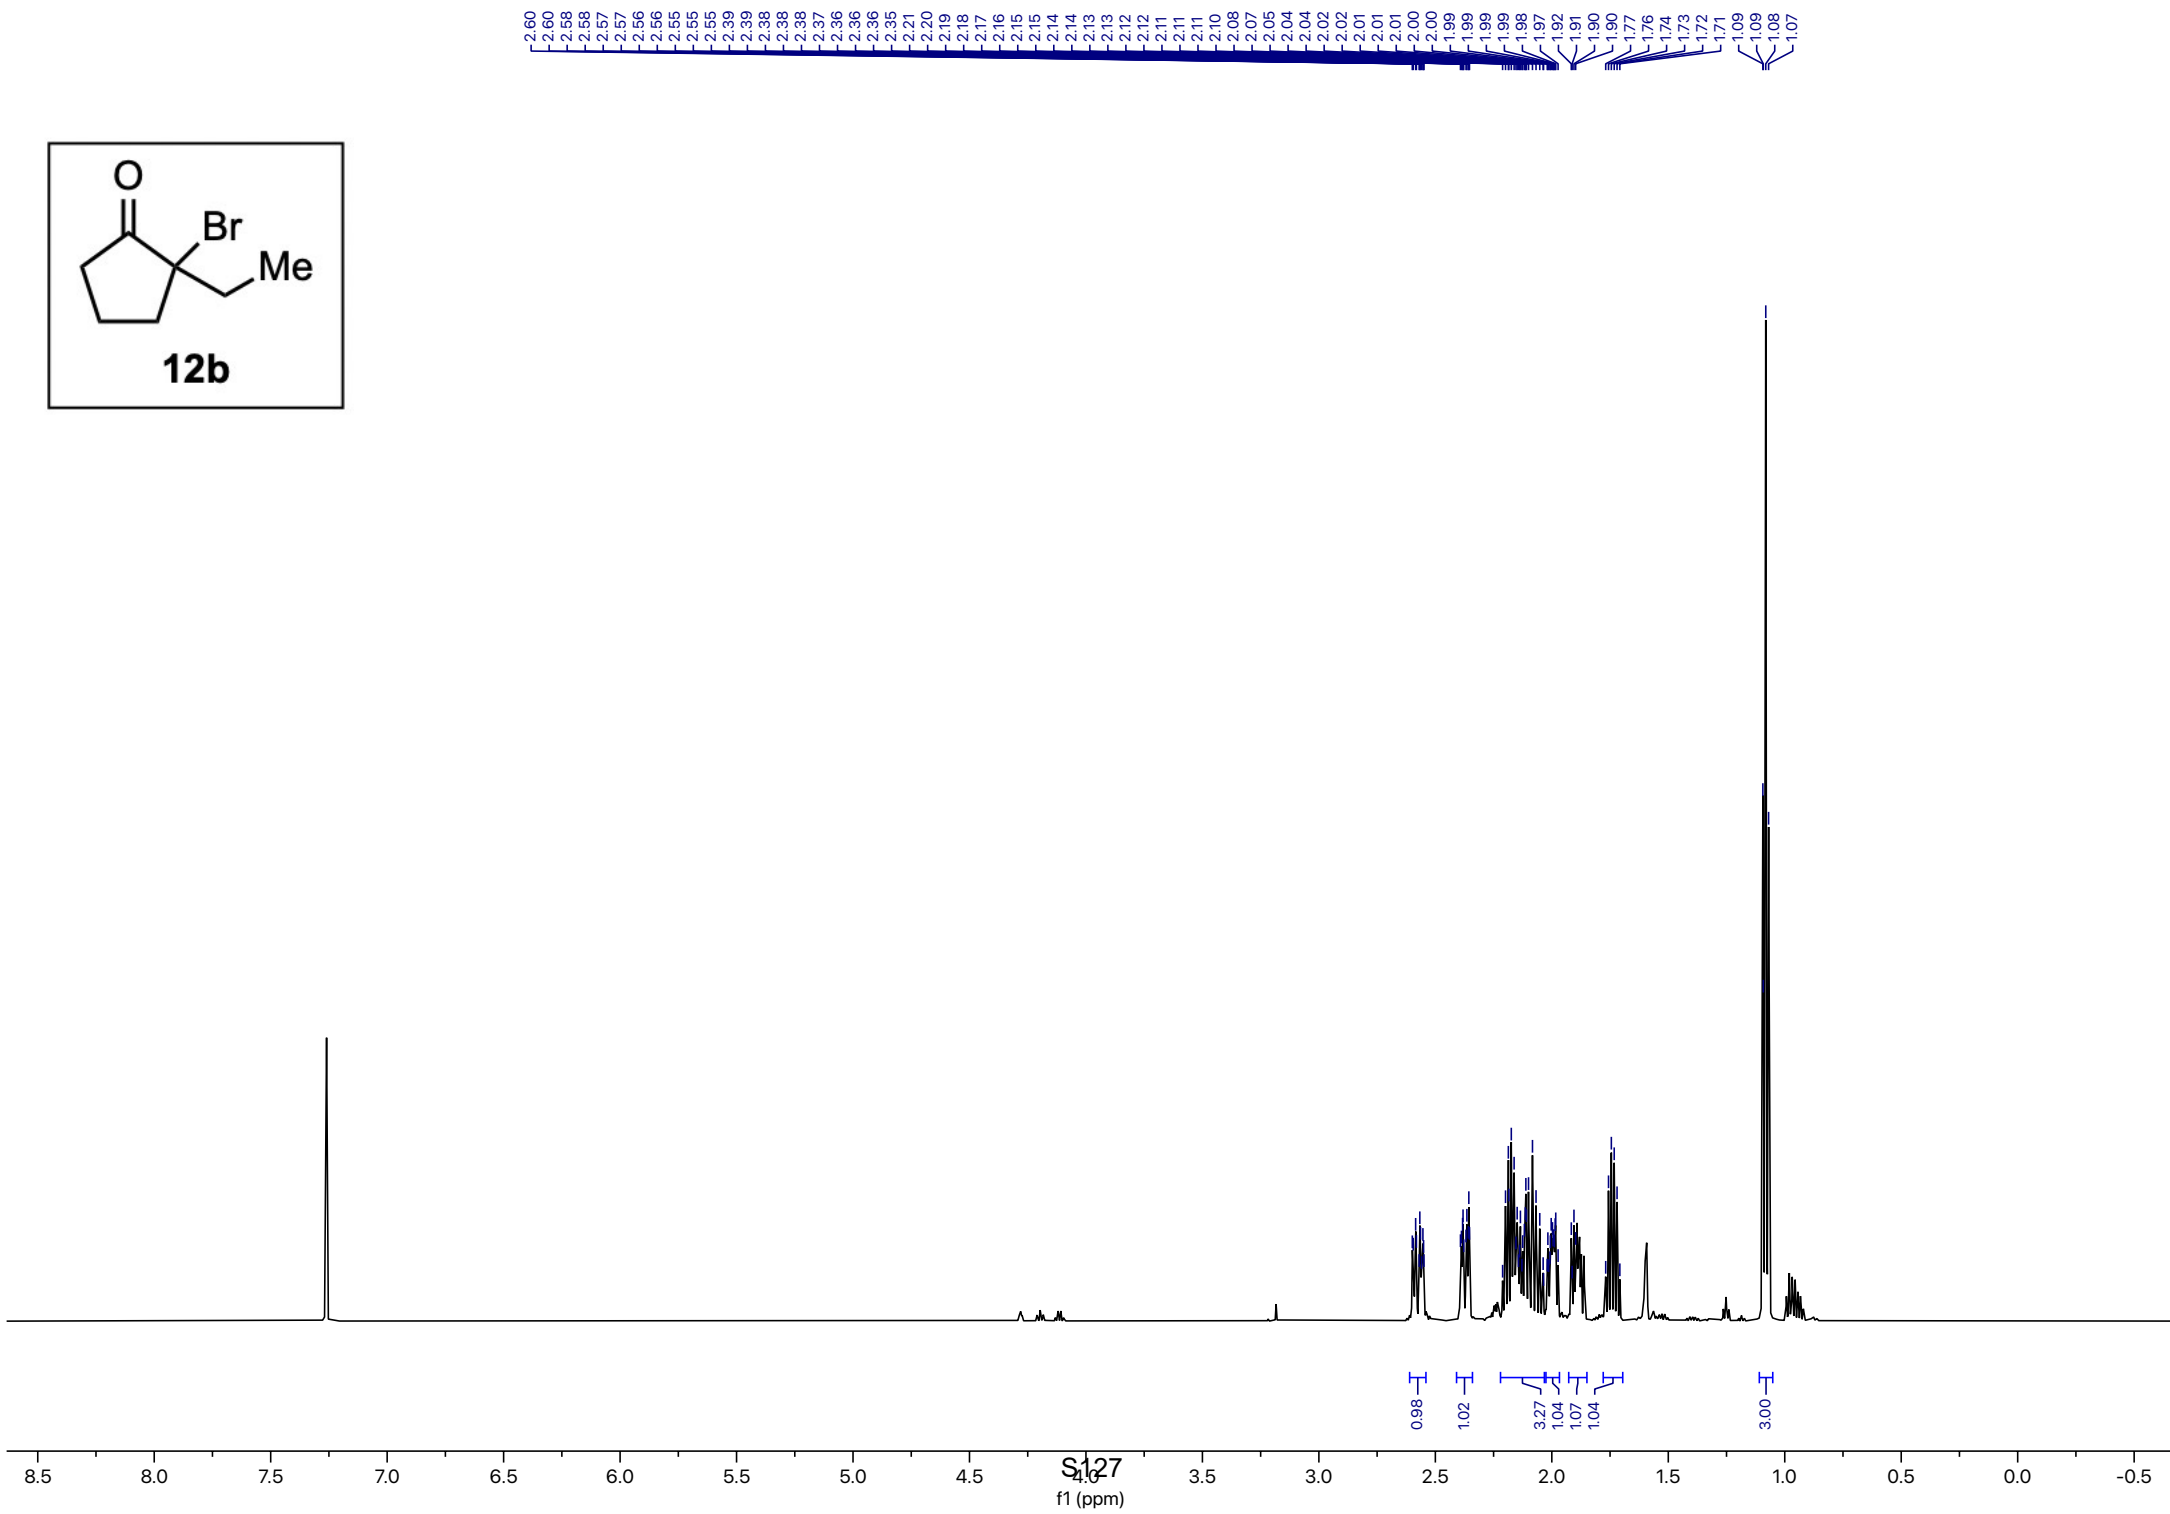



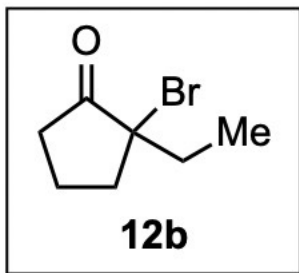

— 211.08

— 70.84

— 38.48

— 35.38

— 30.69

— 19.00

— 10.46

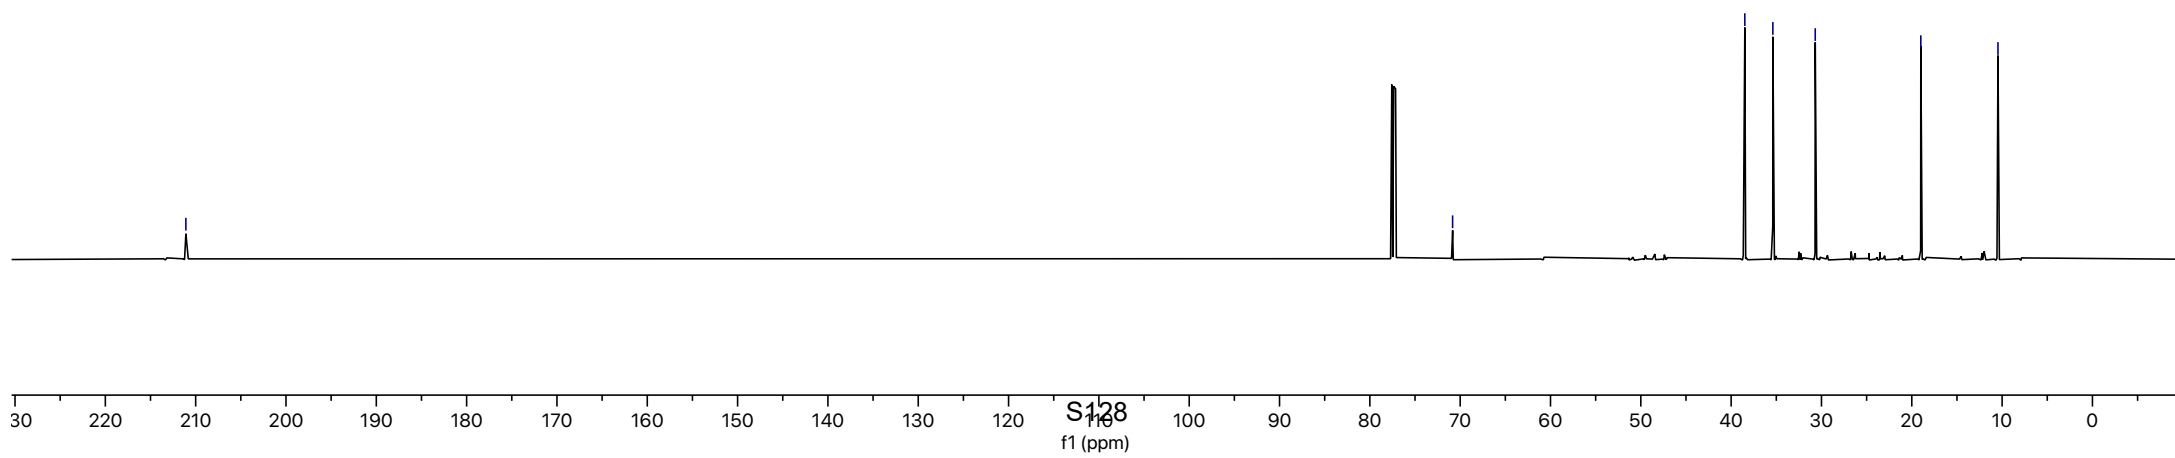

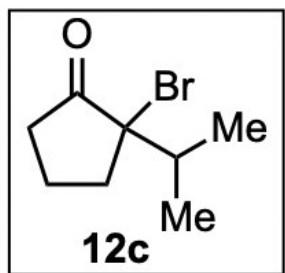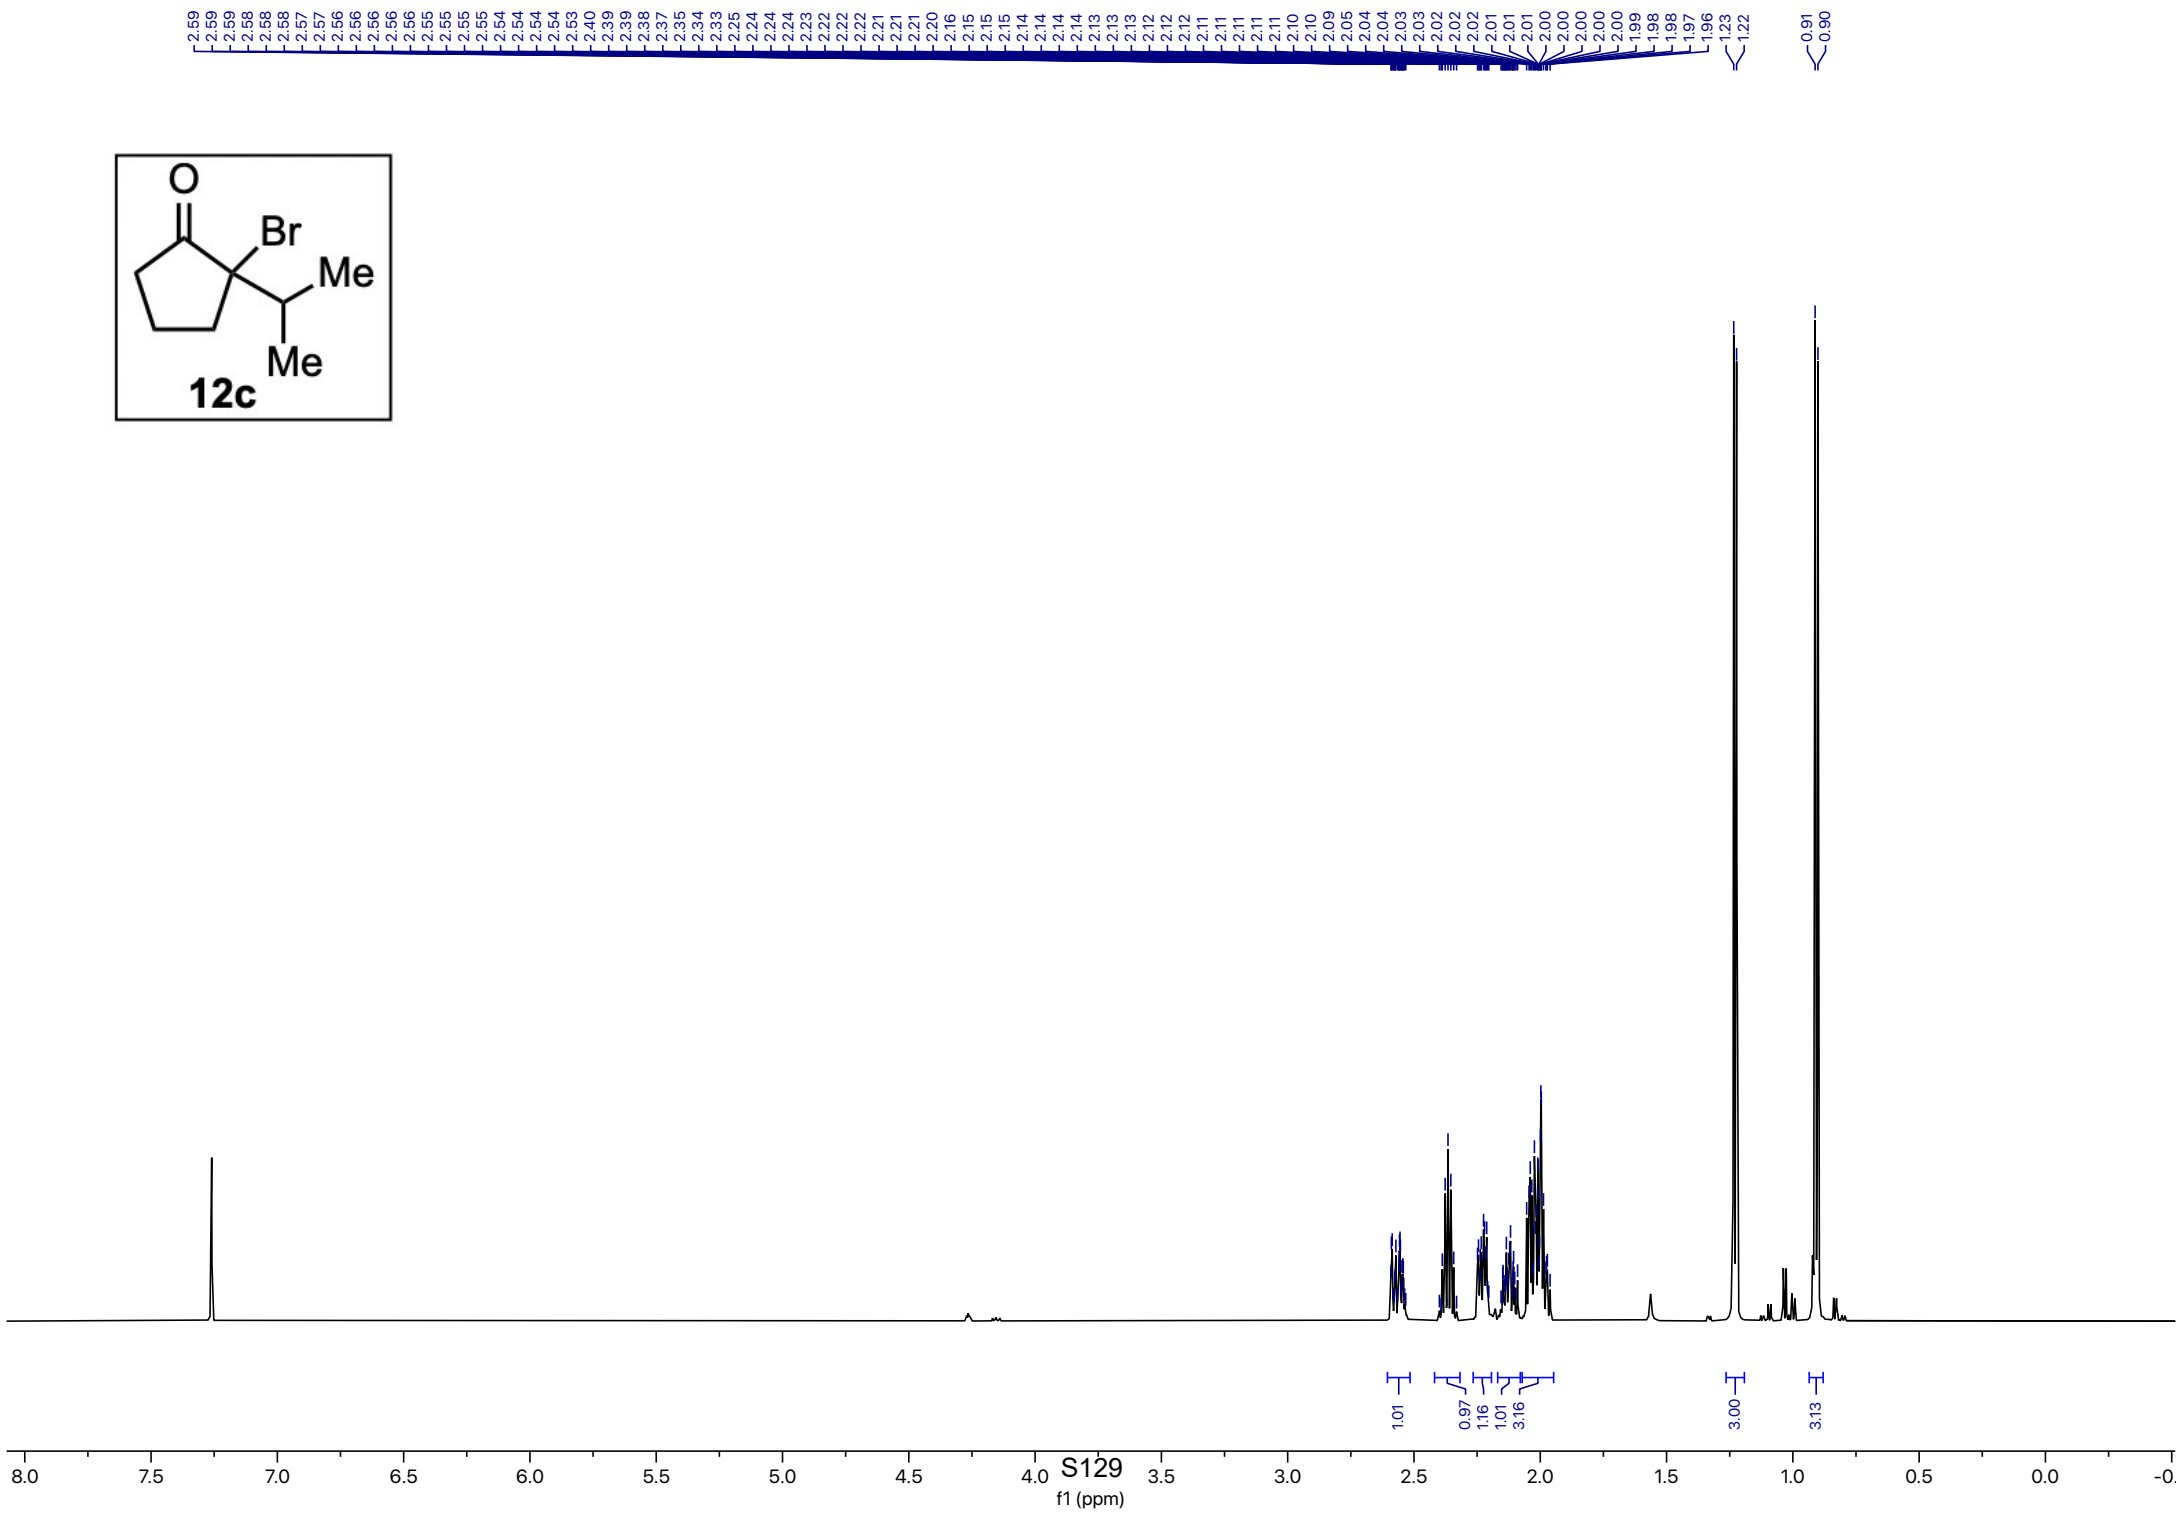



— 211.09

— 75.87

36.47  
34.44  
34.17

19.40  
18.81  
18.49

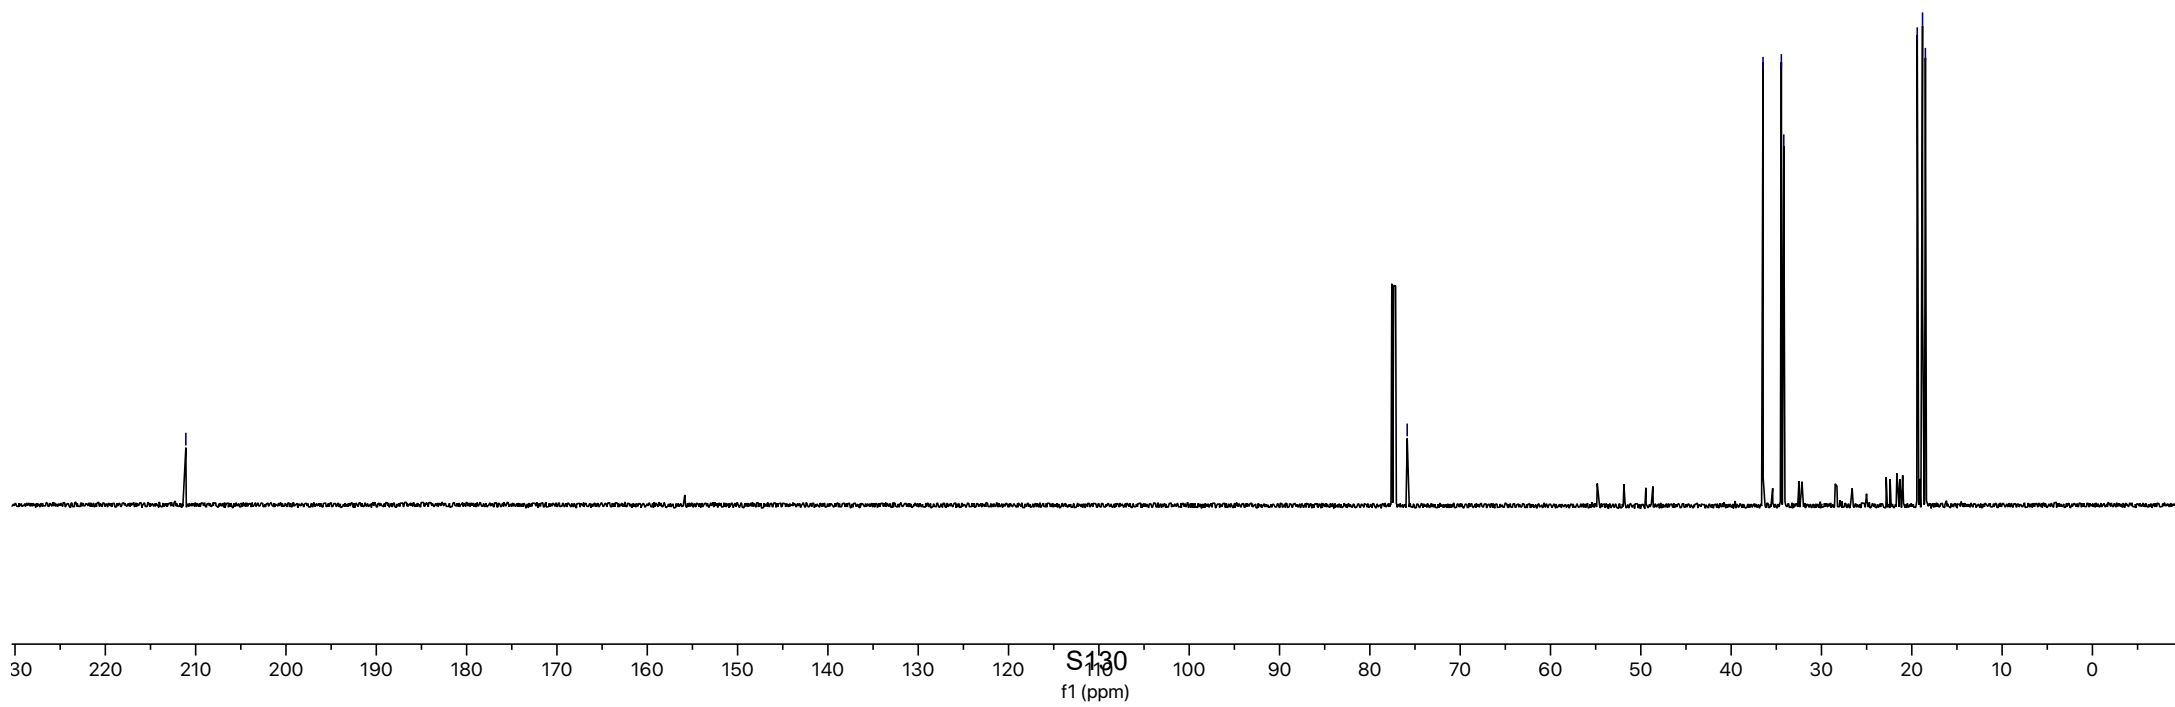

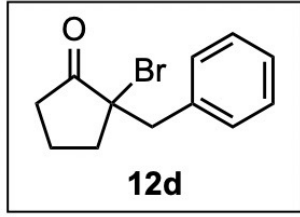

7.31  
7.31  
7.31  
7.30  
7.29  
7.29  
7.27  
7.27  
7.27  
7.26  
7.25  
7.25  
7.23  
7.22  
7.21  
7.21

3.43  
3.41  
3.40  
3.38

2.58  
2.57  
2.57  
2.56  
2.56  
2.54  
2.54  
2.53  
2.53

2.25  
2.25  
2.24  
2.24  
2.23  
2.22  
2.22  
2.21  
2.13  
2.12  
2.12  
2.11  
2.11  
2.10  
2.10  
2.09  
2.09  
2.05  
2.03  
2.01  
2.00  
2.00  
1.99  
1.98  
1.97  
1.97  
1.95  
1.93  
1.92  
1.91  
1.91  
1.90  
1.90  
1.89  
1.89  
1.89  
1.89

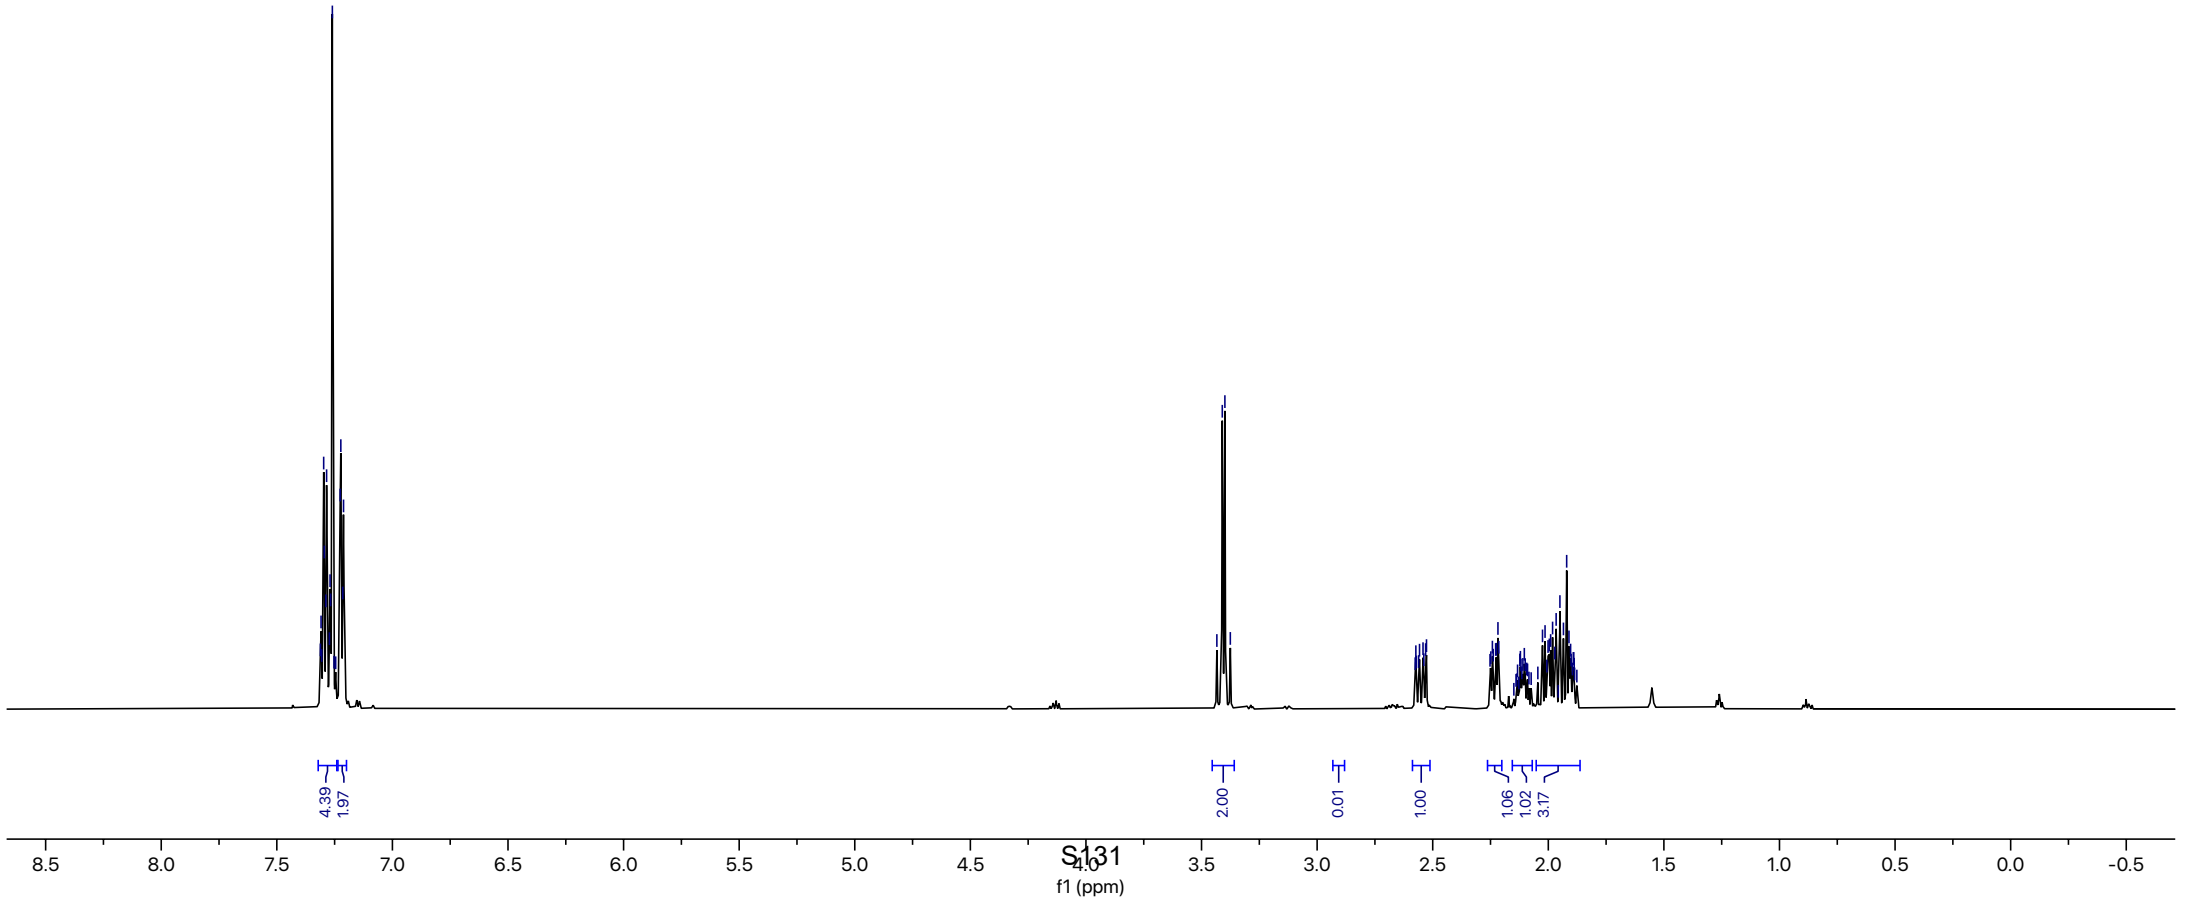

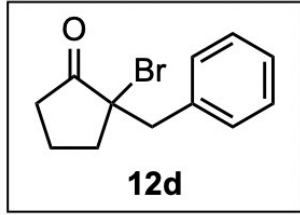

210.68

136.56

130.91

128.75

127.48

68.87

43.37

37.79

36.59

18.94

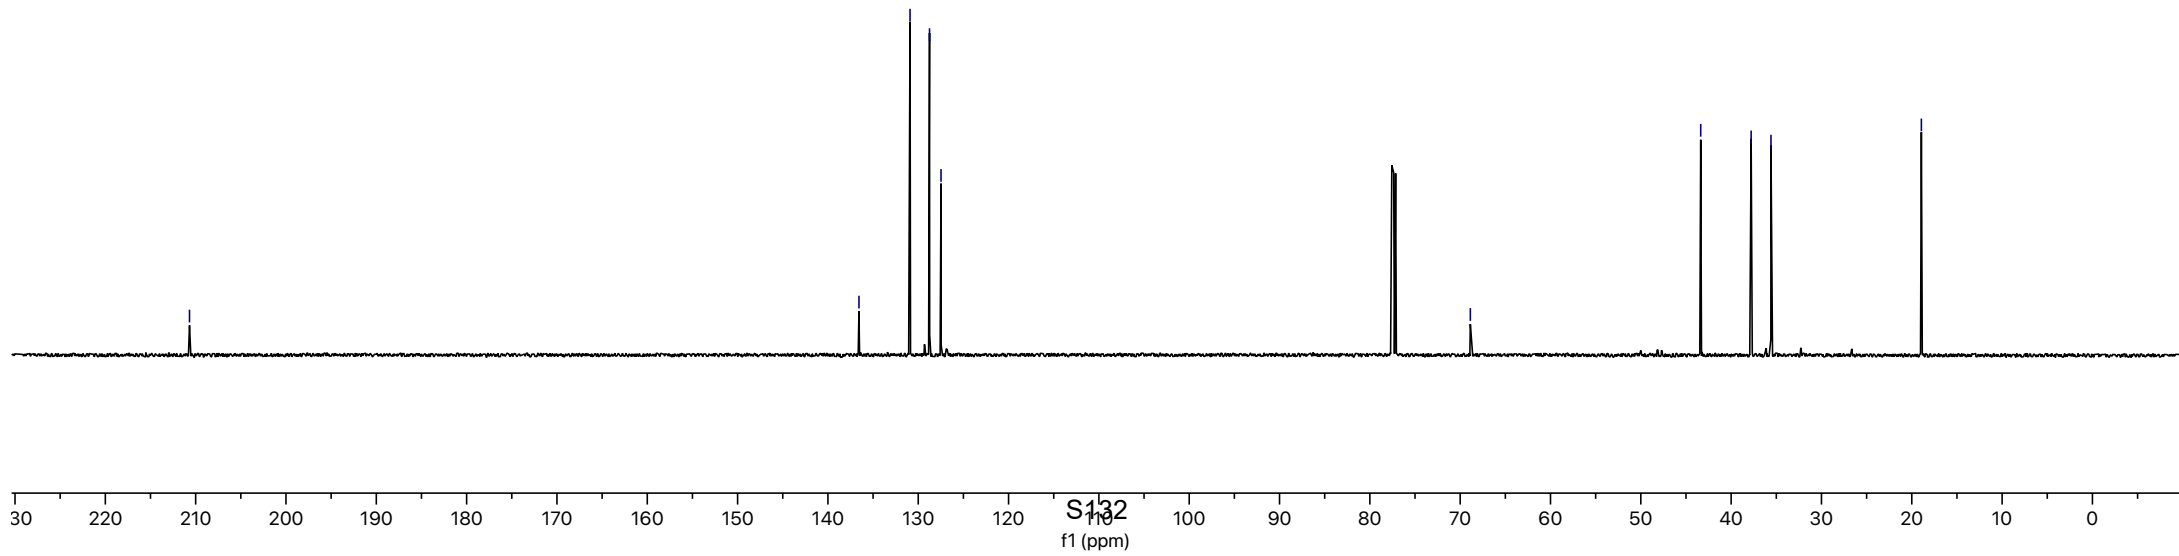

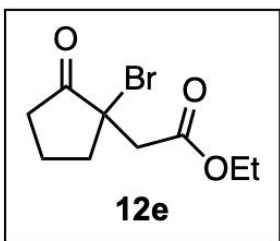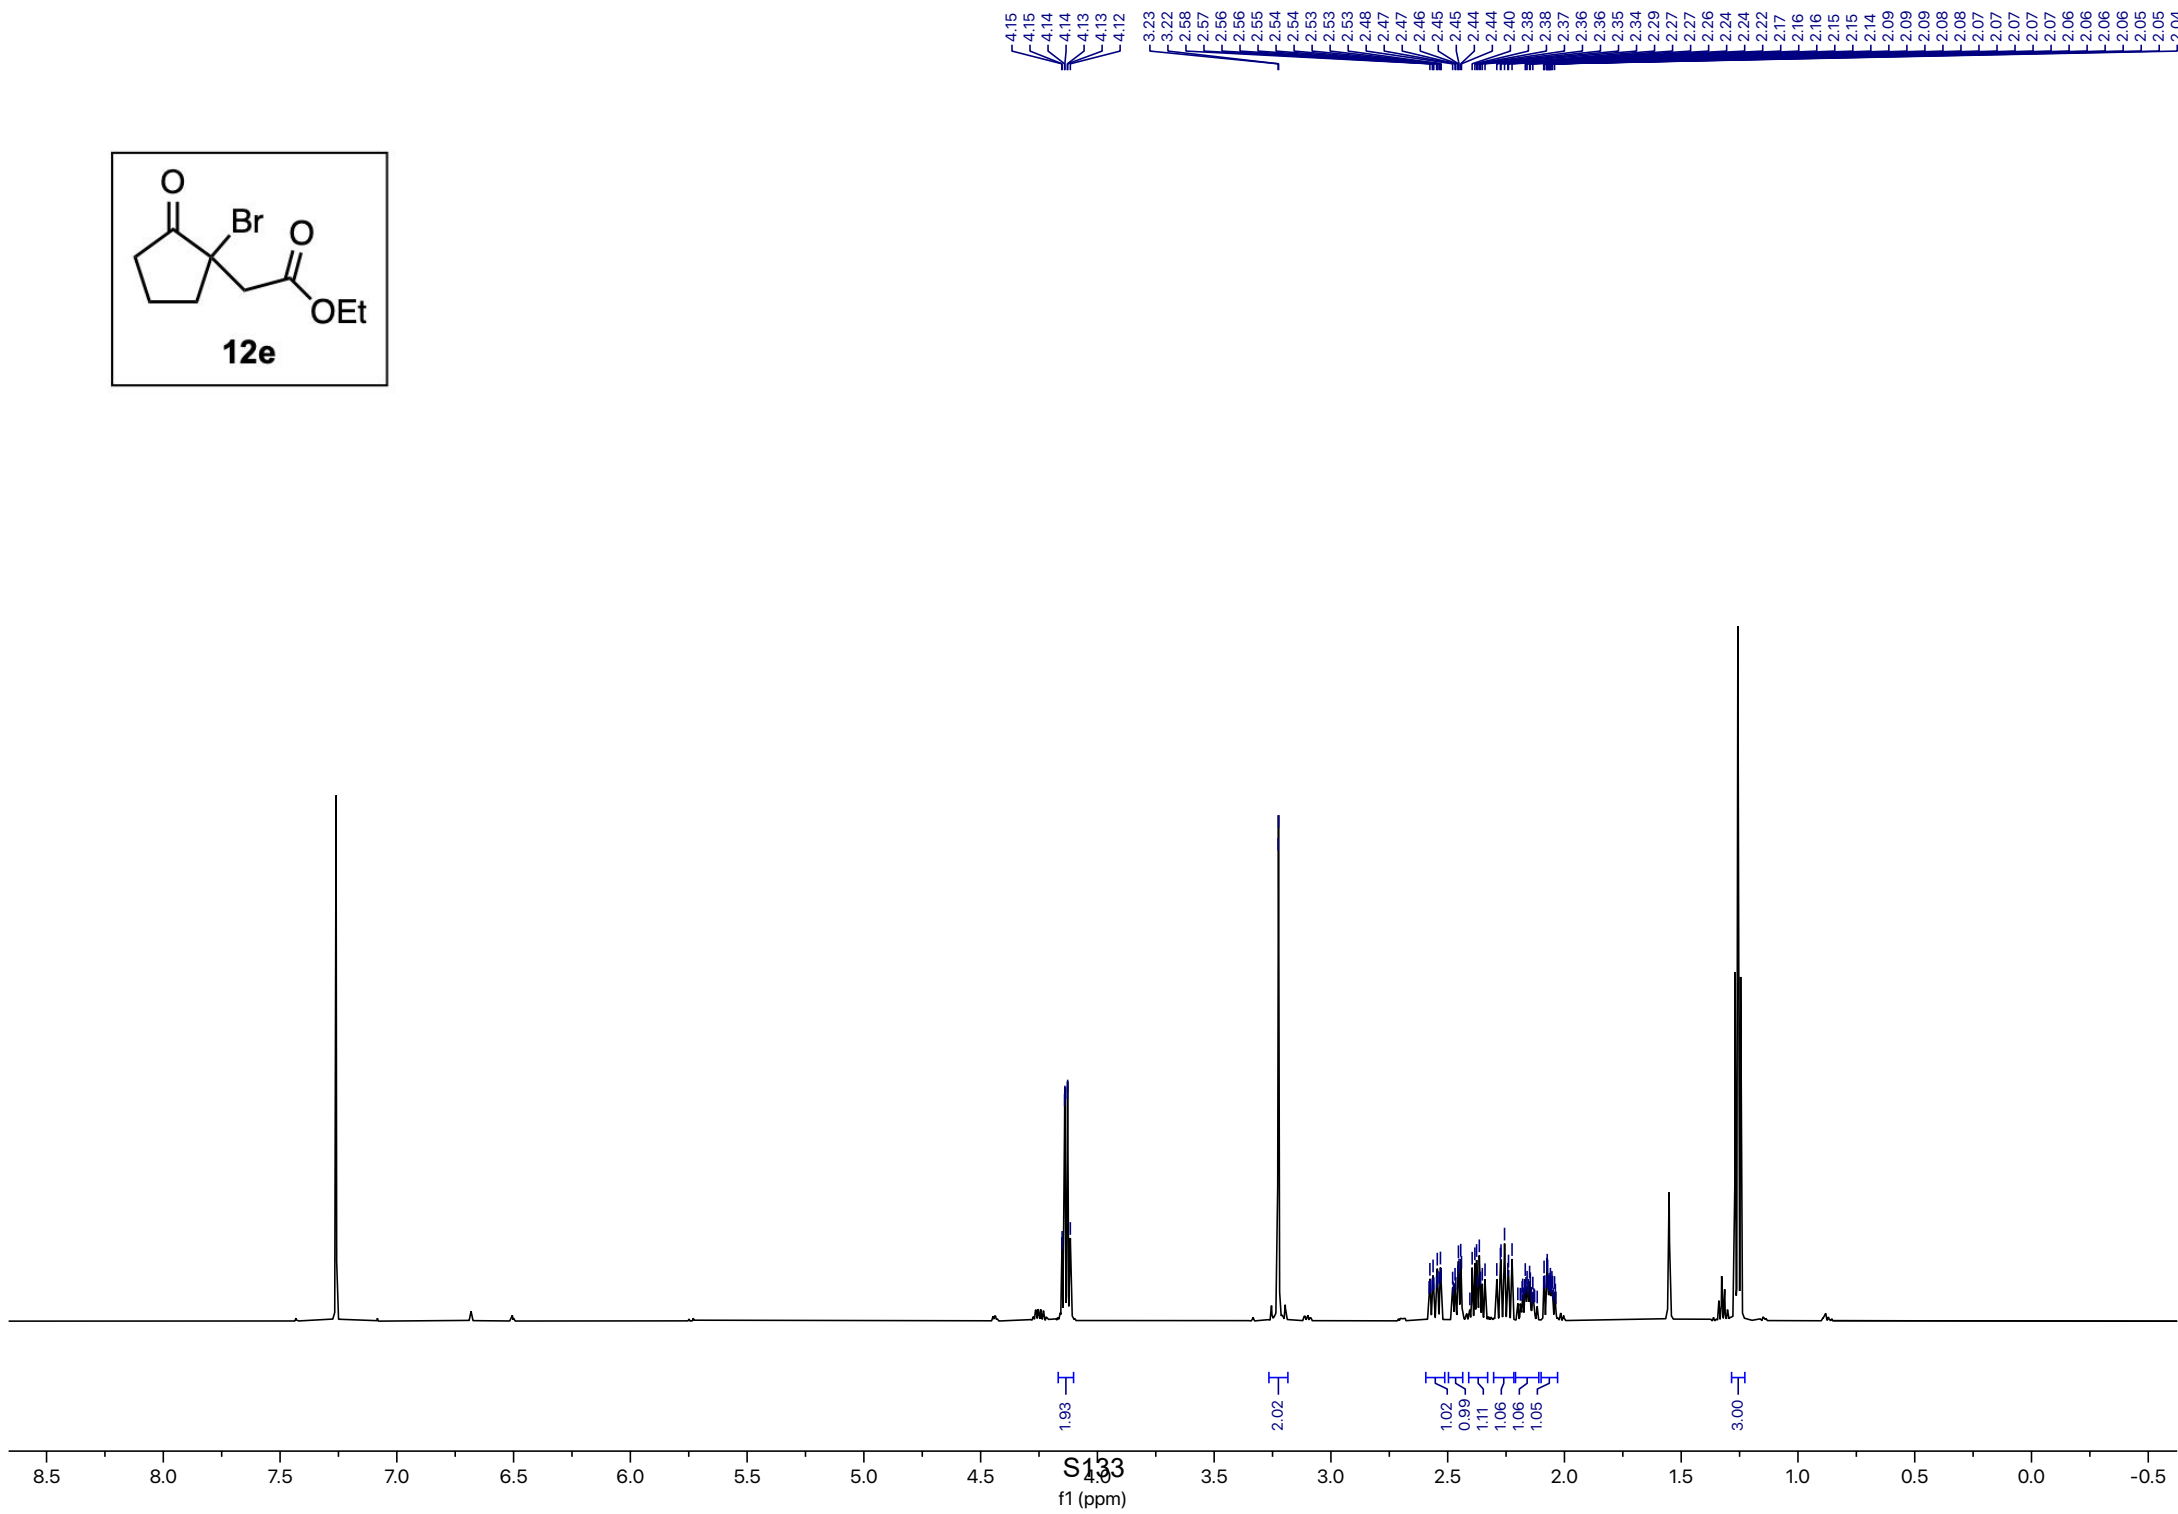



210.10

169.75

62.57  
61.40

42.48  
38.57  
34.94

19.21  
14.43

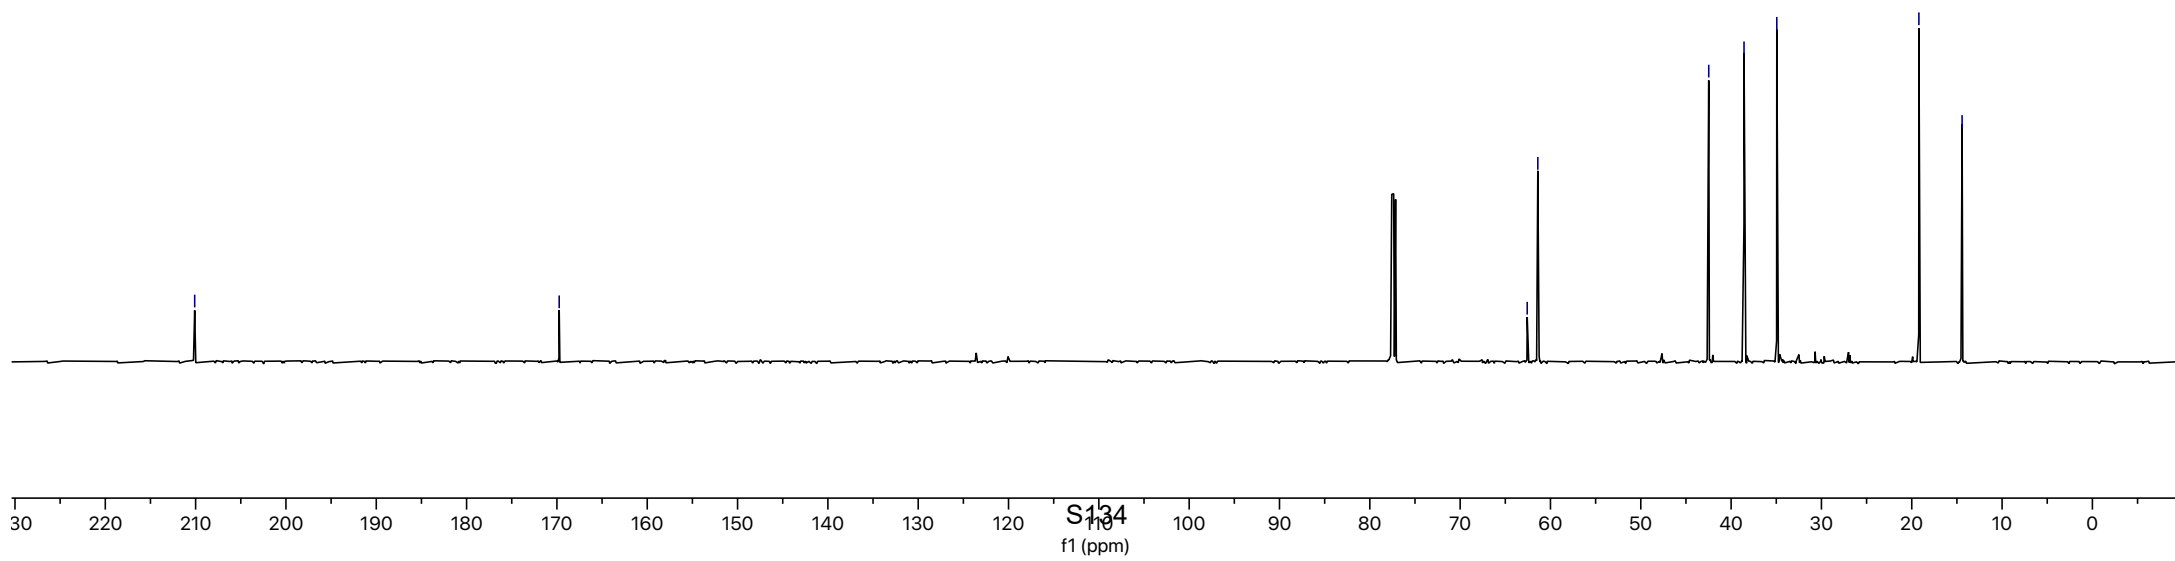

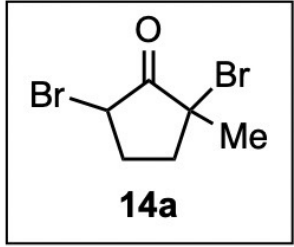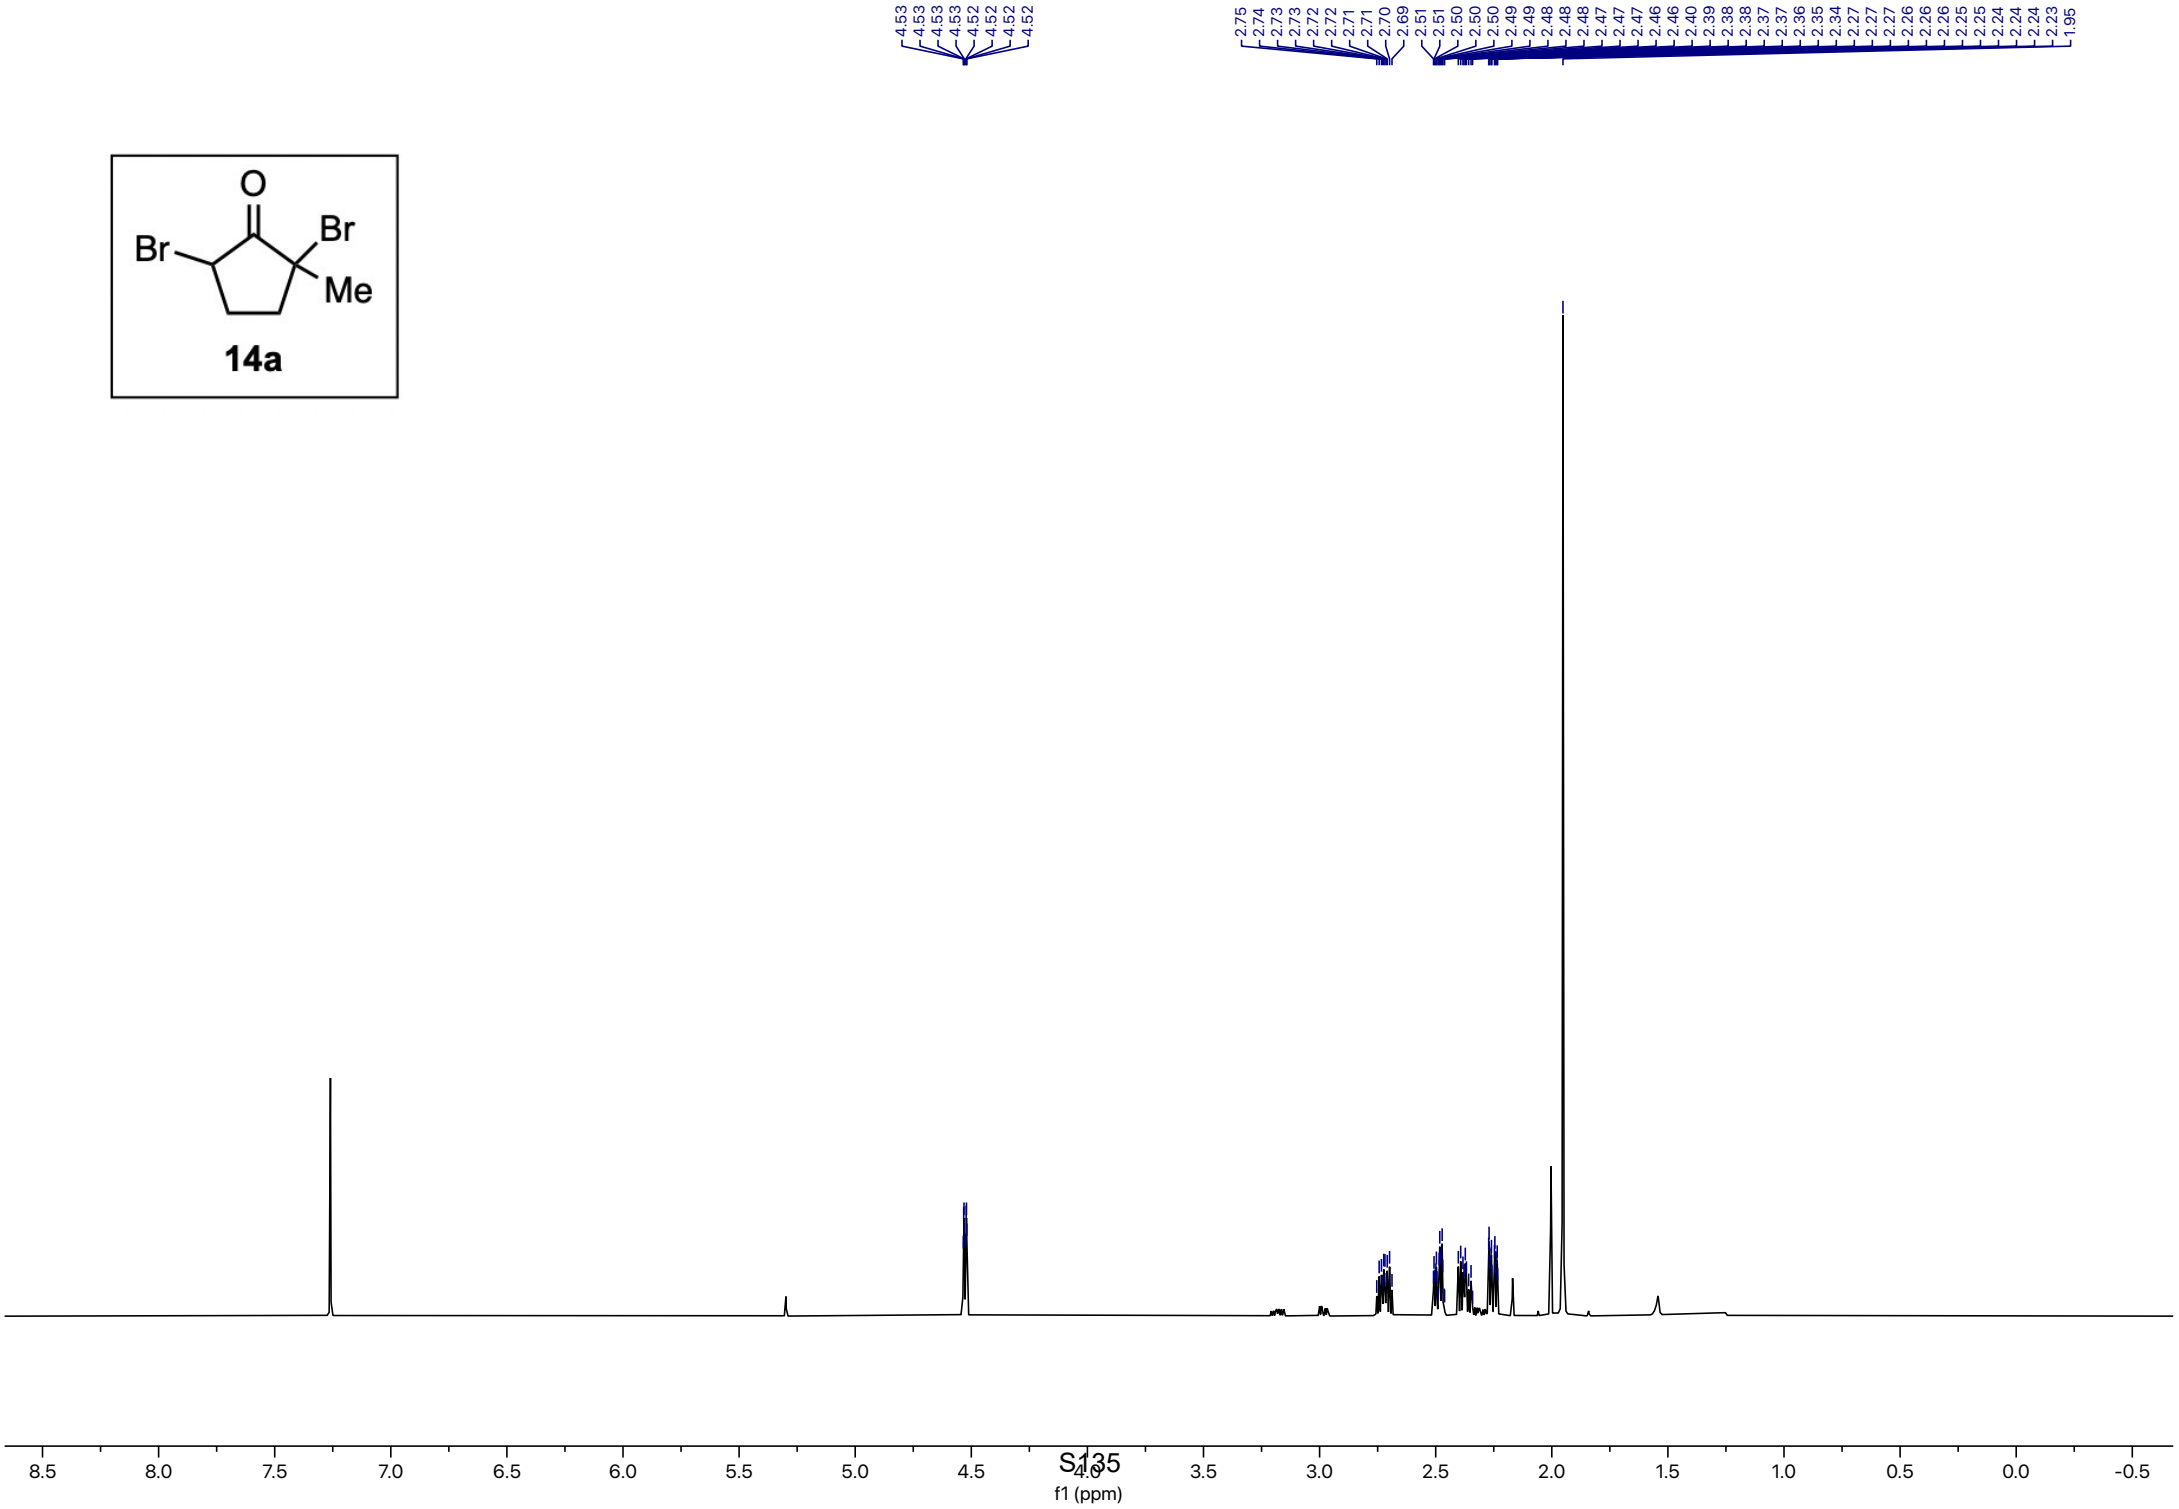



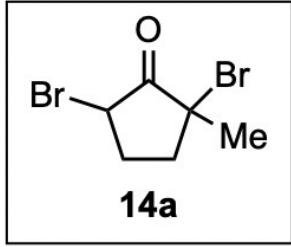

204.31  
204.21

62.39

45.30  
44.21

39.10  
38.09  
39.07

31.07  
27.72  
26.94  
26.92

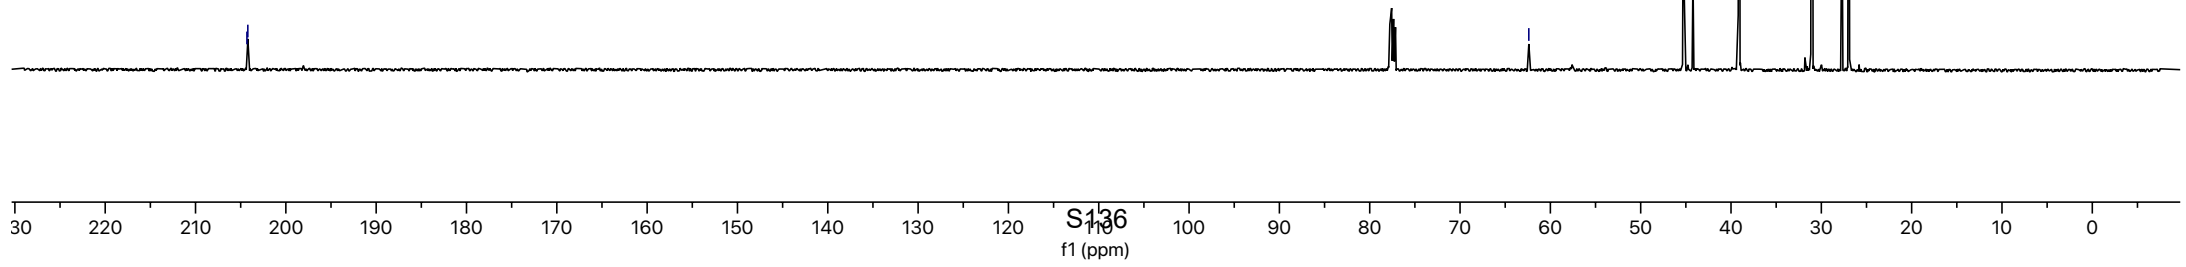

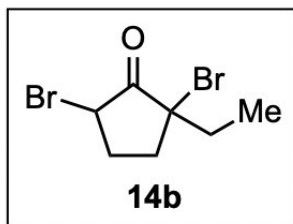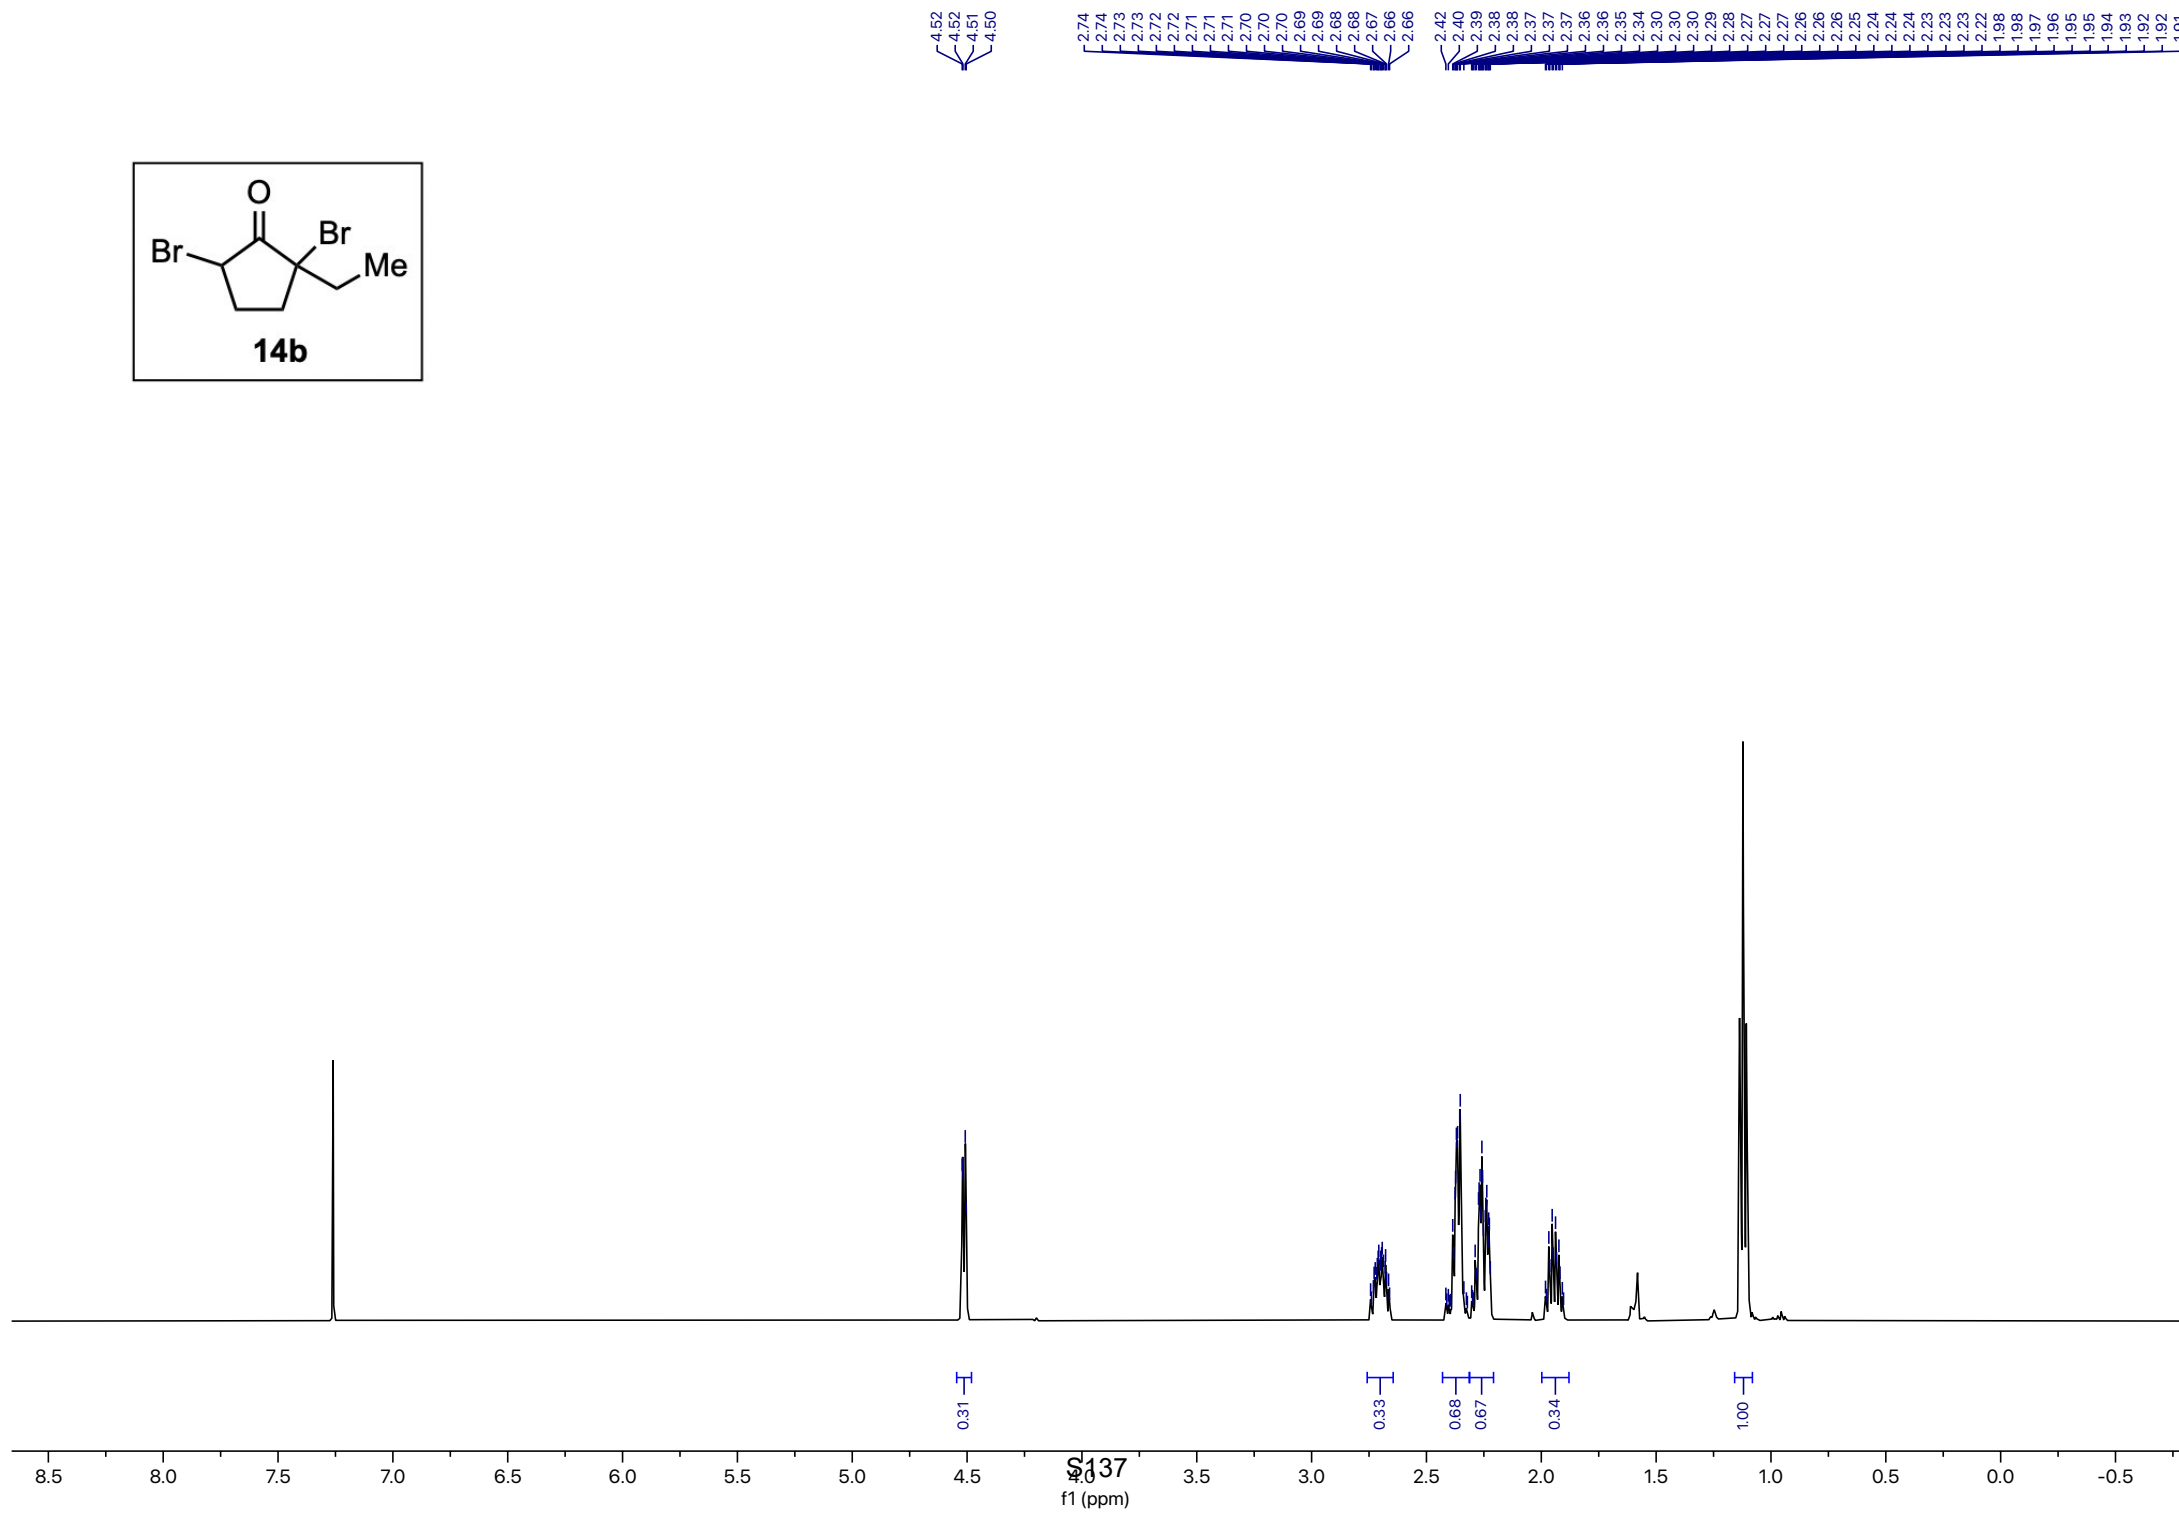

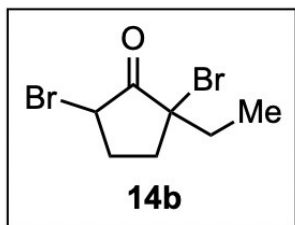

204.14

66.71

45.79

35.89

32.05

31.04

10.54

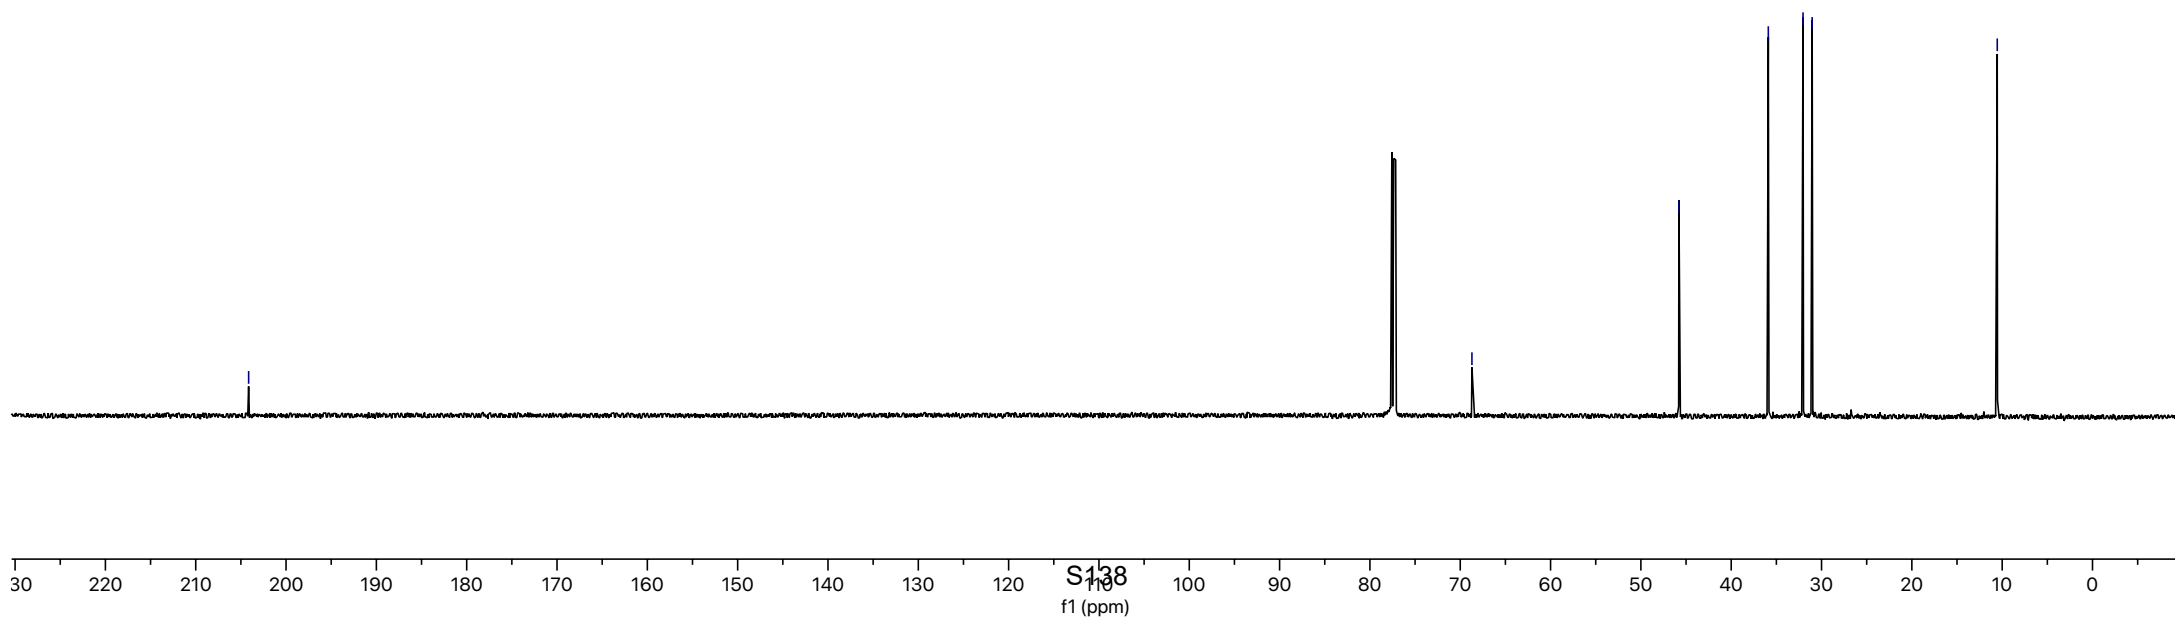

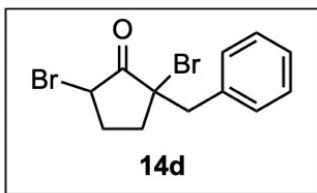

7.34  
7.33  
7.33  
7.32  
7.30  
7.30  
7.29  
7.24

4.50  
4.49

3.48  
3.48  
2.73  
2.72  
2.71  
2.70  
2.70  
2.69  
2.68  
2.68  
2.67  
2.66  
2.47  
2.46  
2.45  
2.45  
2.44  
2.44  
2.43  
2.42  
2.23  
2.22  
2.21  
2.20  
2.17  
2.16  
2.15  
2.14  
2.13

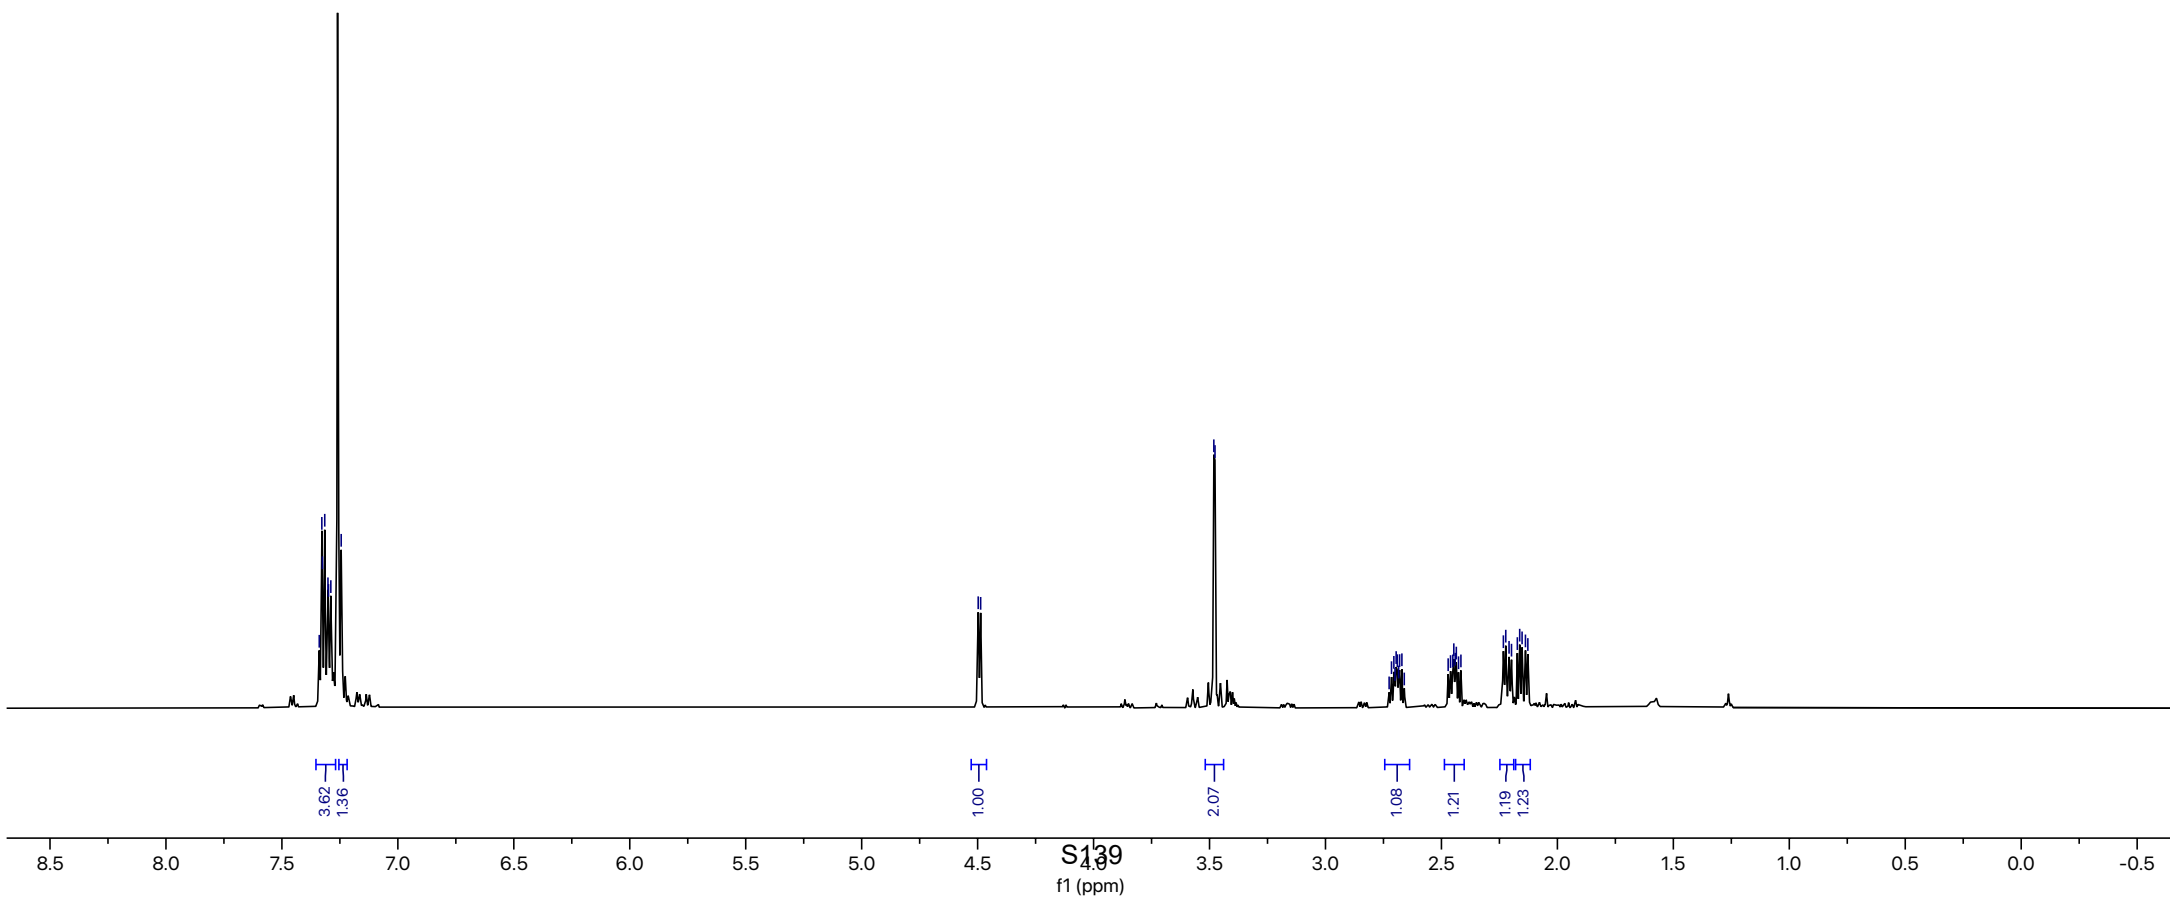

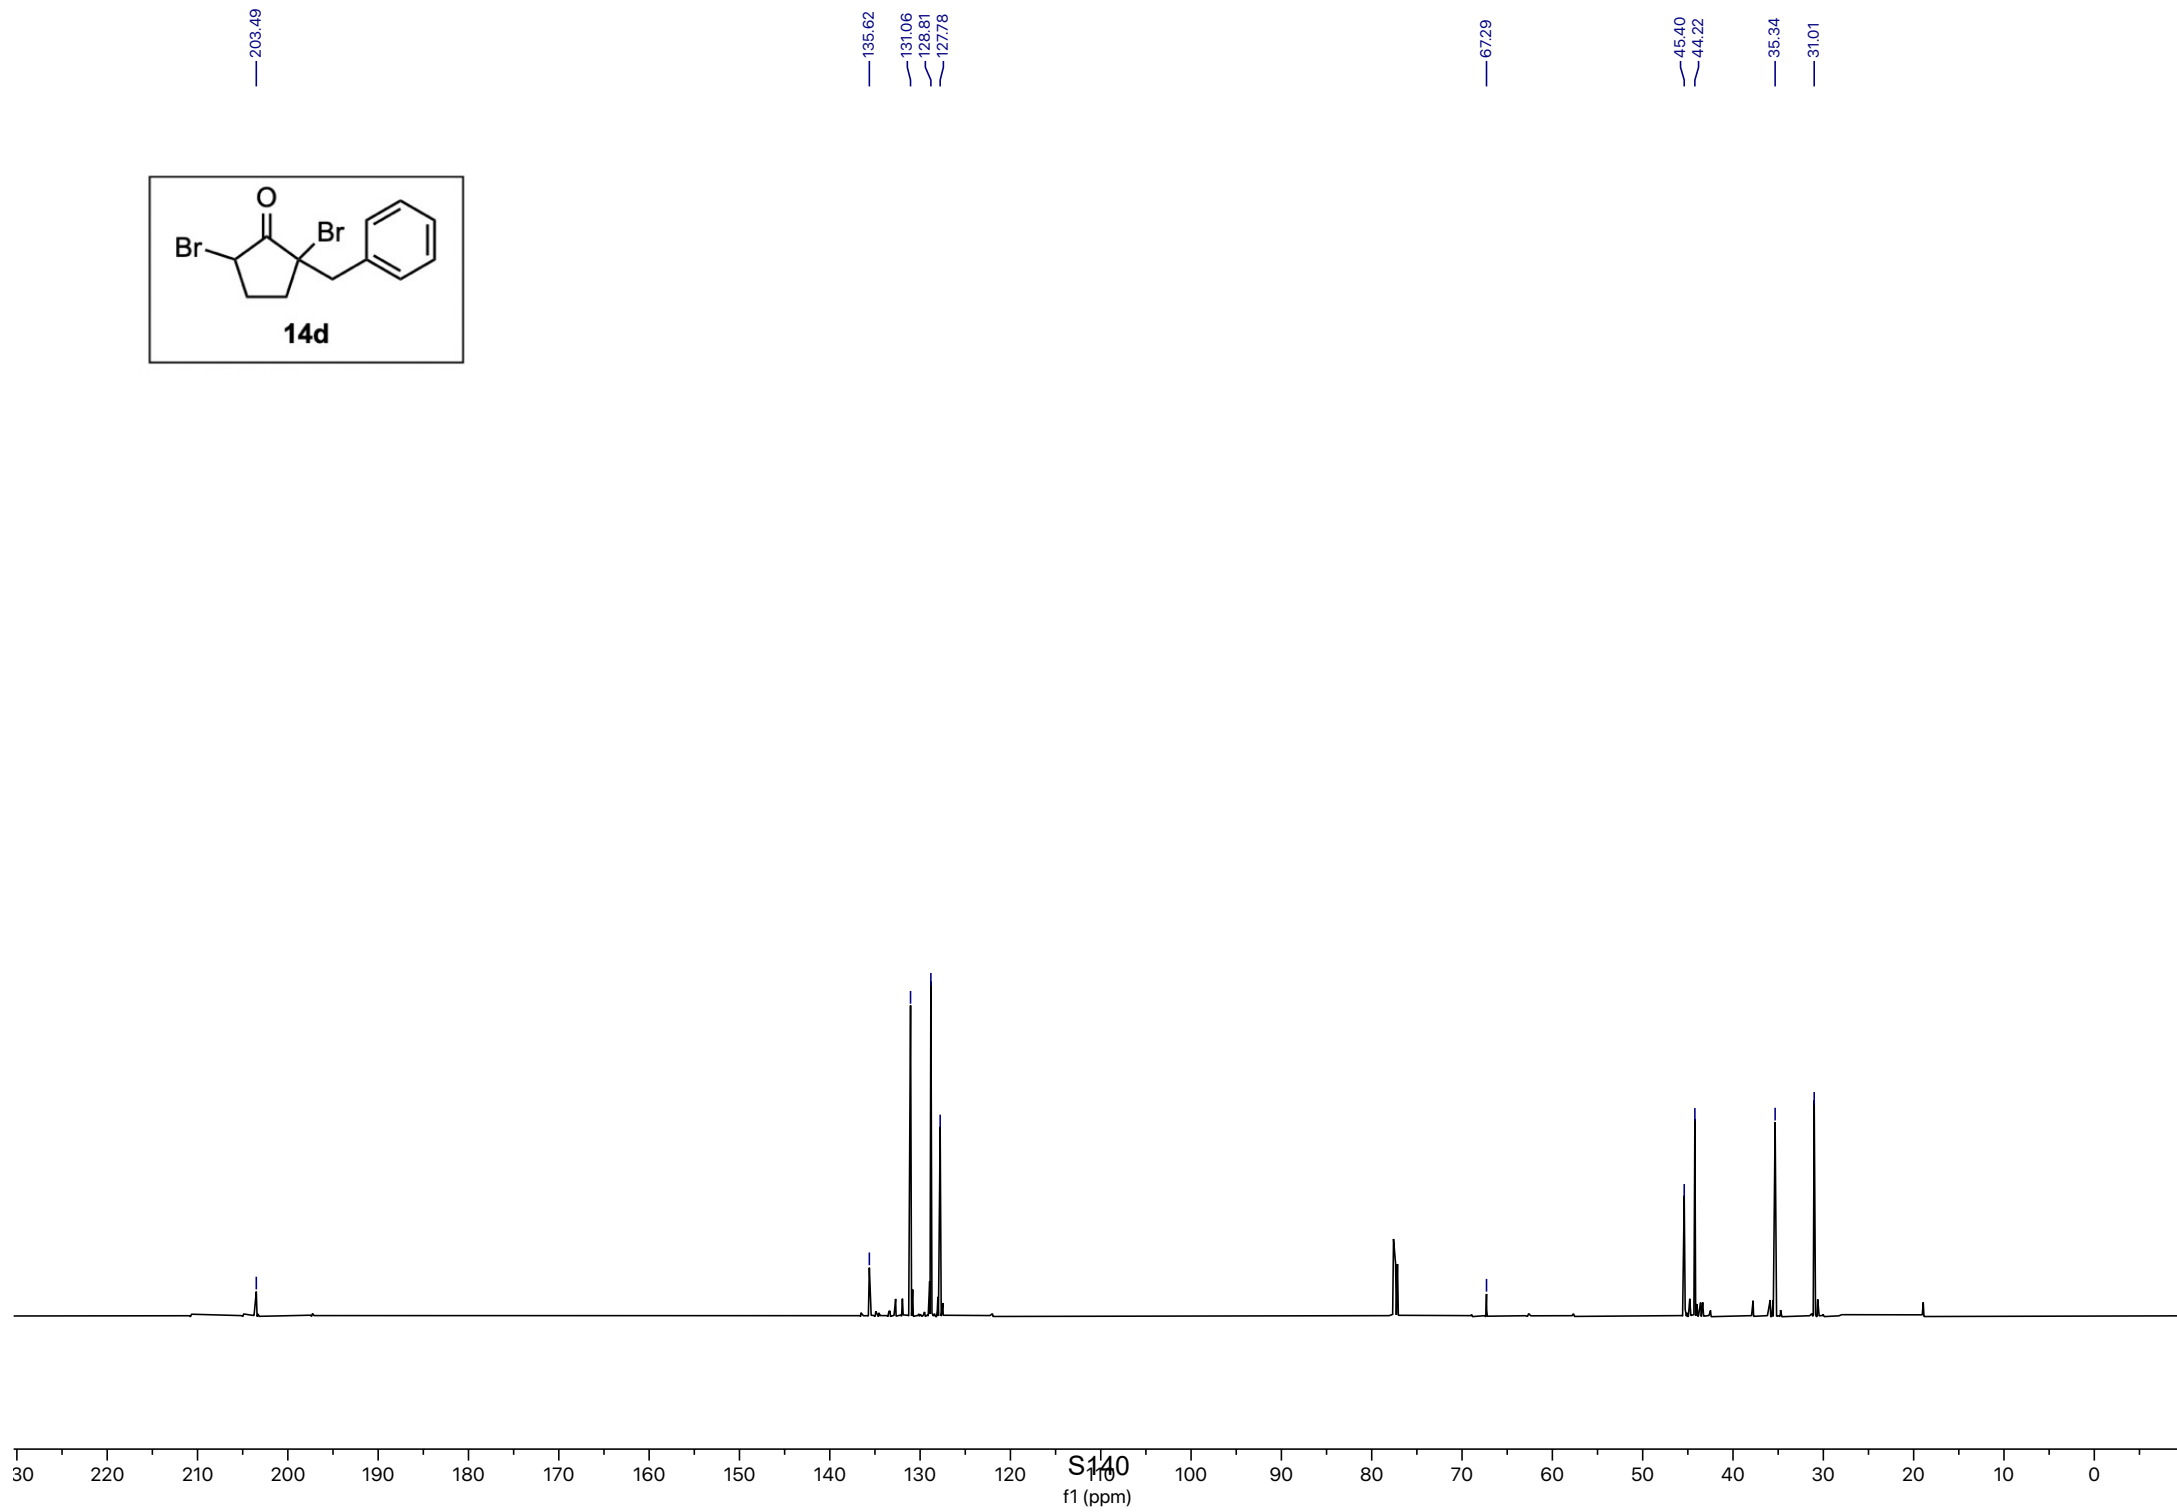

4.59  
4.59  
4.58  
4.58  
4.58  
4.57  
4.40  
4.38  
4.38  
4.36  
4.23  
4.22  
4.21  
4.21  
4.20  
4.20  
4.19  
4.19  
4.14  
4.14  
4.13  
4.13  
4.13  
4.13  
4.12  
4.11  
4.11  
4.10  
4.09  
4.09  
3.44  
3.41  
3.34  
3.34  
3.31  
3.31  
3.26  
3.23  
3.11  
3.08  
2.81  
2.80  
2.79  
2.78  
2.78  
2.78  
2.77  
2.77  
2.76  
2.76  
2.75  
2.74  
2.74  
2.71  
2.71  
2.70  
2.70  
2.70  
2.69  
2.68  
2.68  
2.68  
2.67  
2.67  
2.66  
2.66  
2.65  
2.64  
2.64  
2.63  
2.63  
2.63  
2.62  
2.62  
2.61  
2.61  
2.60  
2.54  
2.54  
2.52  
2.51  
2.50  
2.50  
2.49  
2.48  
2.48  
2.46  
2.45  
2.44  
2.44  
2.44  
2.44  
2.43  
2.43  
2.34  
2.34  
2.34  
2.33  
2.33  
2.32  
2.32  
2.31  
2.31  
2.31  
2.30  
2.30  
1.30  
1.30  
1.29  
1.29  
1.28  
1.28  
1.26  
1.26  
1.25  
1.25  
1.24

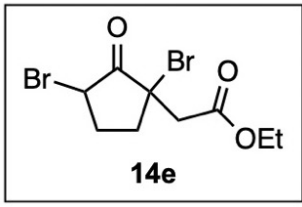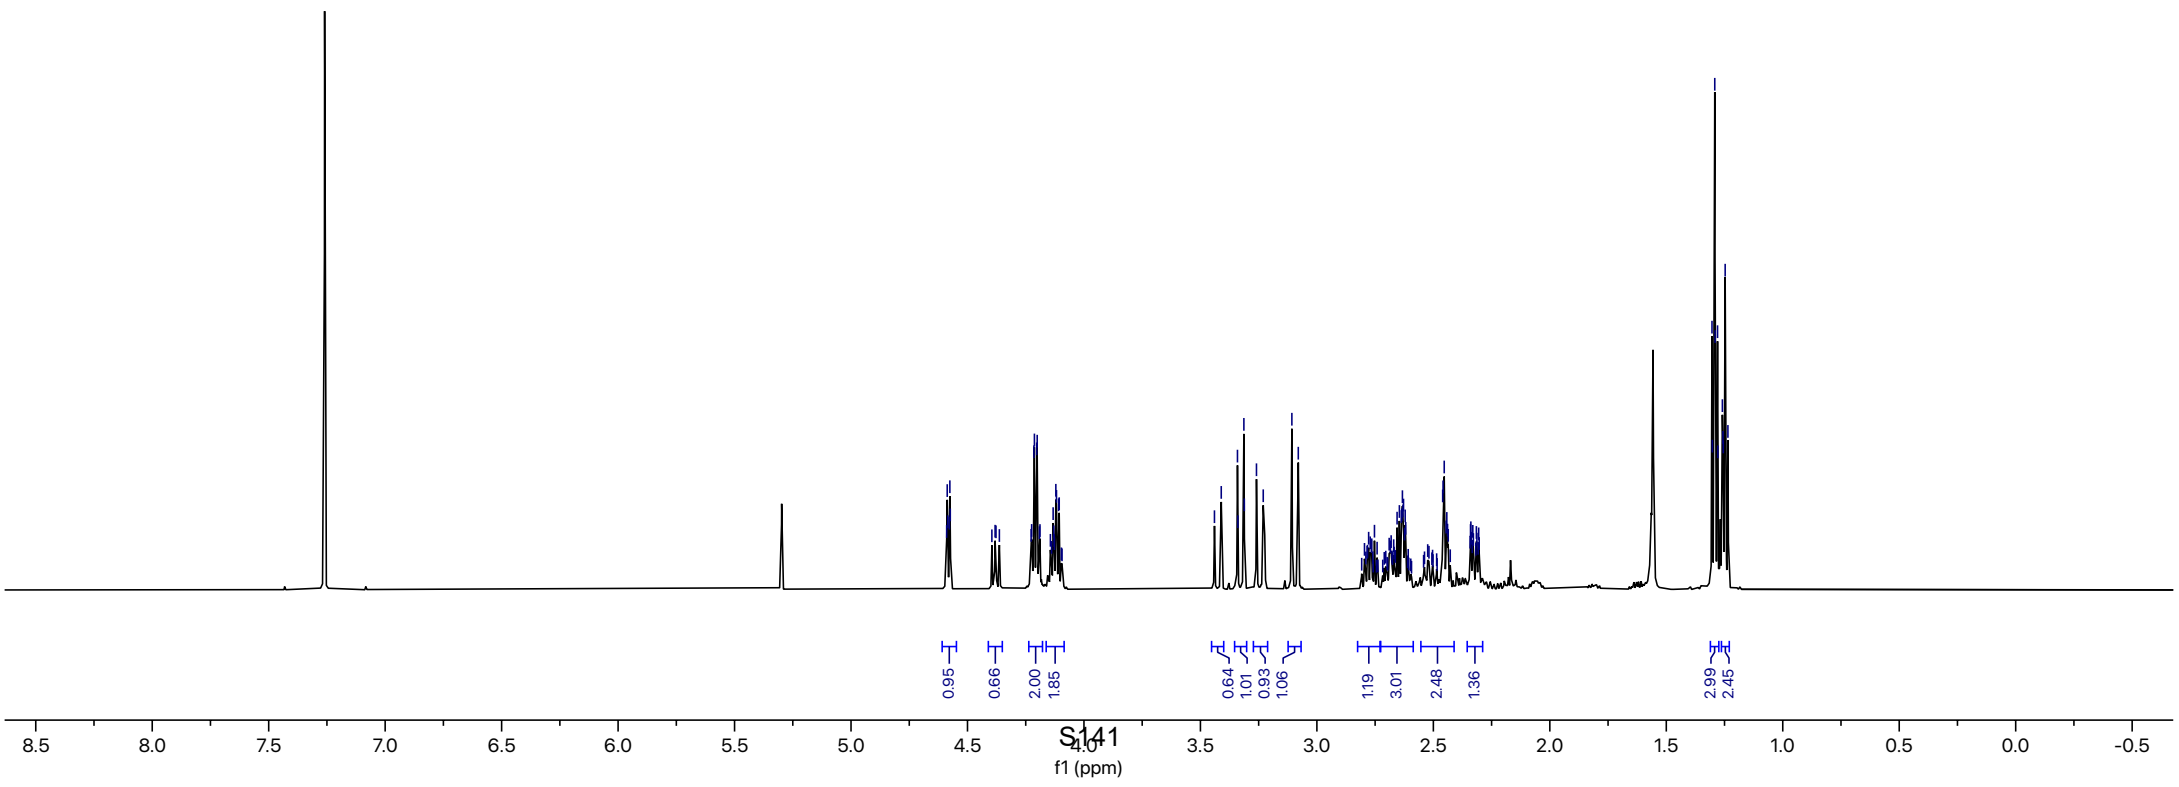

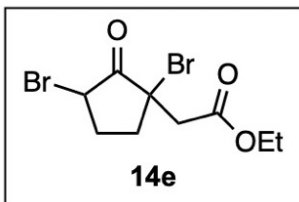

204.39  
203.00

169.74  
168.83

61.76  
61.64

44.03  
43.67  
43.27  
43.19

37.00  
36.54

31.27  
31.00

14.52  
14.40

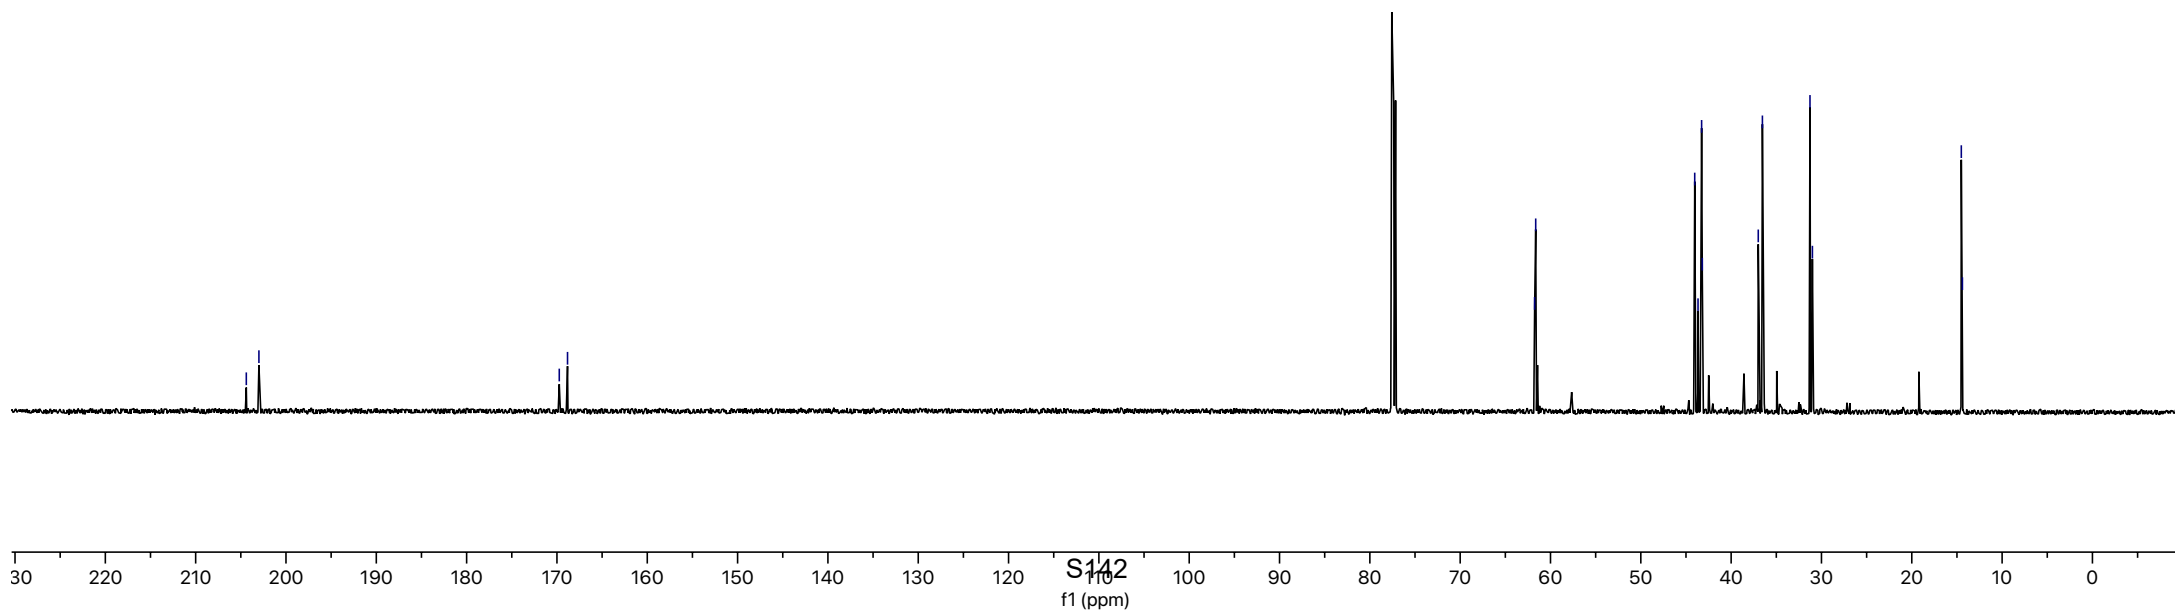

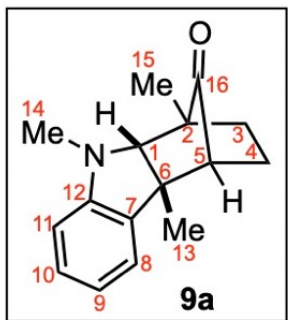

7.12  
7.12  
7.11  
7.11  
7.10  
7.10  
6.89  
6.88  
6.87  
6.87  
6.63  
6.63  
6.62  
6.62  
6.61  
6.61  
6.40  
6.39

3.20  
3.20

2.86

2.00  
1.99  
1.93  
1.93  
1.92  
1.91  
1.91  
1.90  
1.89  
1.66  
1.65  
1.65  
1.64  
1.64  
1.64  
1.63  
1.62  
1.62  
1.61  
1.61  
1.60  
1.60  
1.33  
1.33  
1.33  
1.32  
1.32  
1.32  
1.31  
1.31  
1.30  
1.30  
1.29  
1.29  
1.28  
1.28  
1.27  
1.17

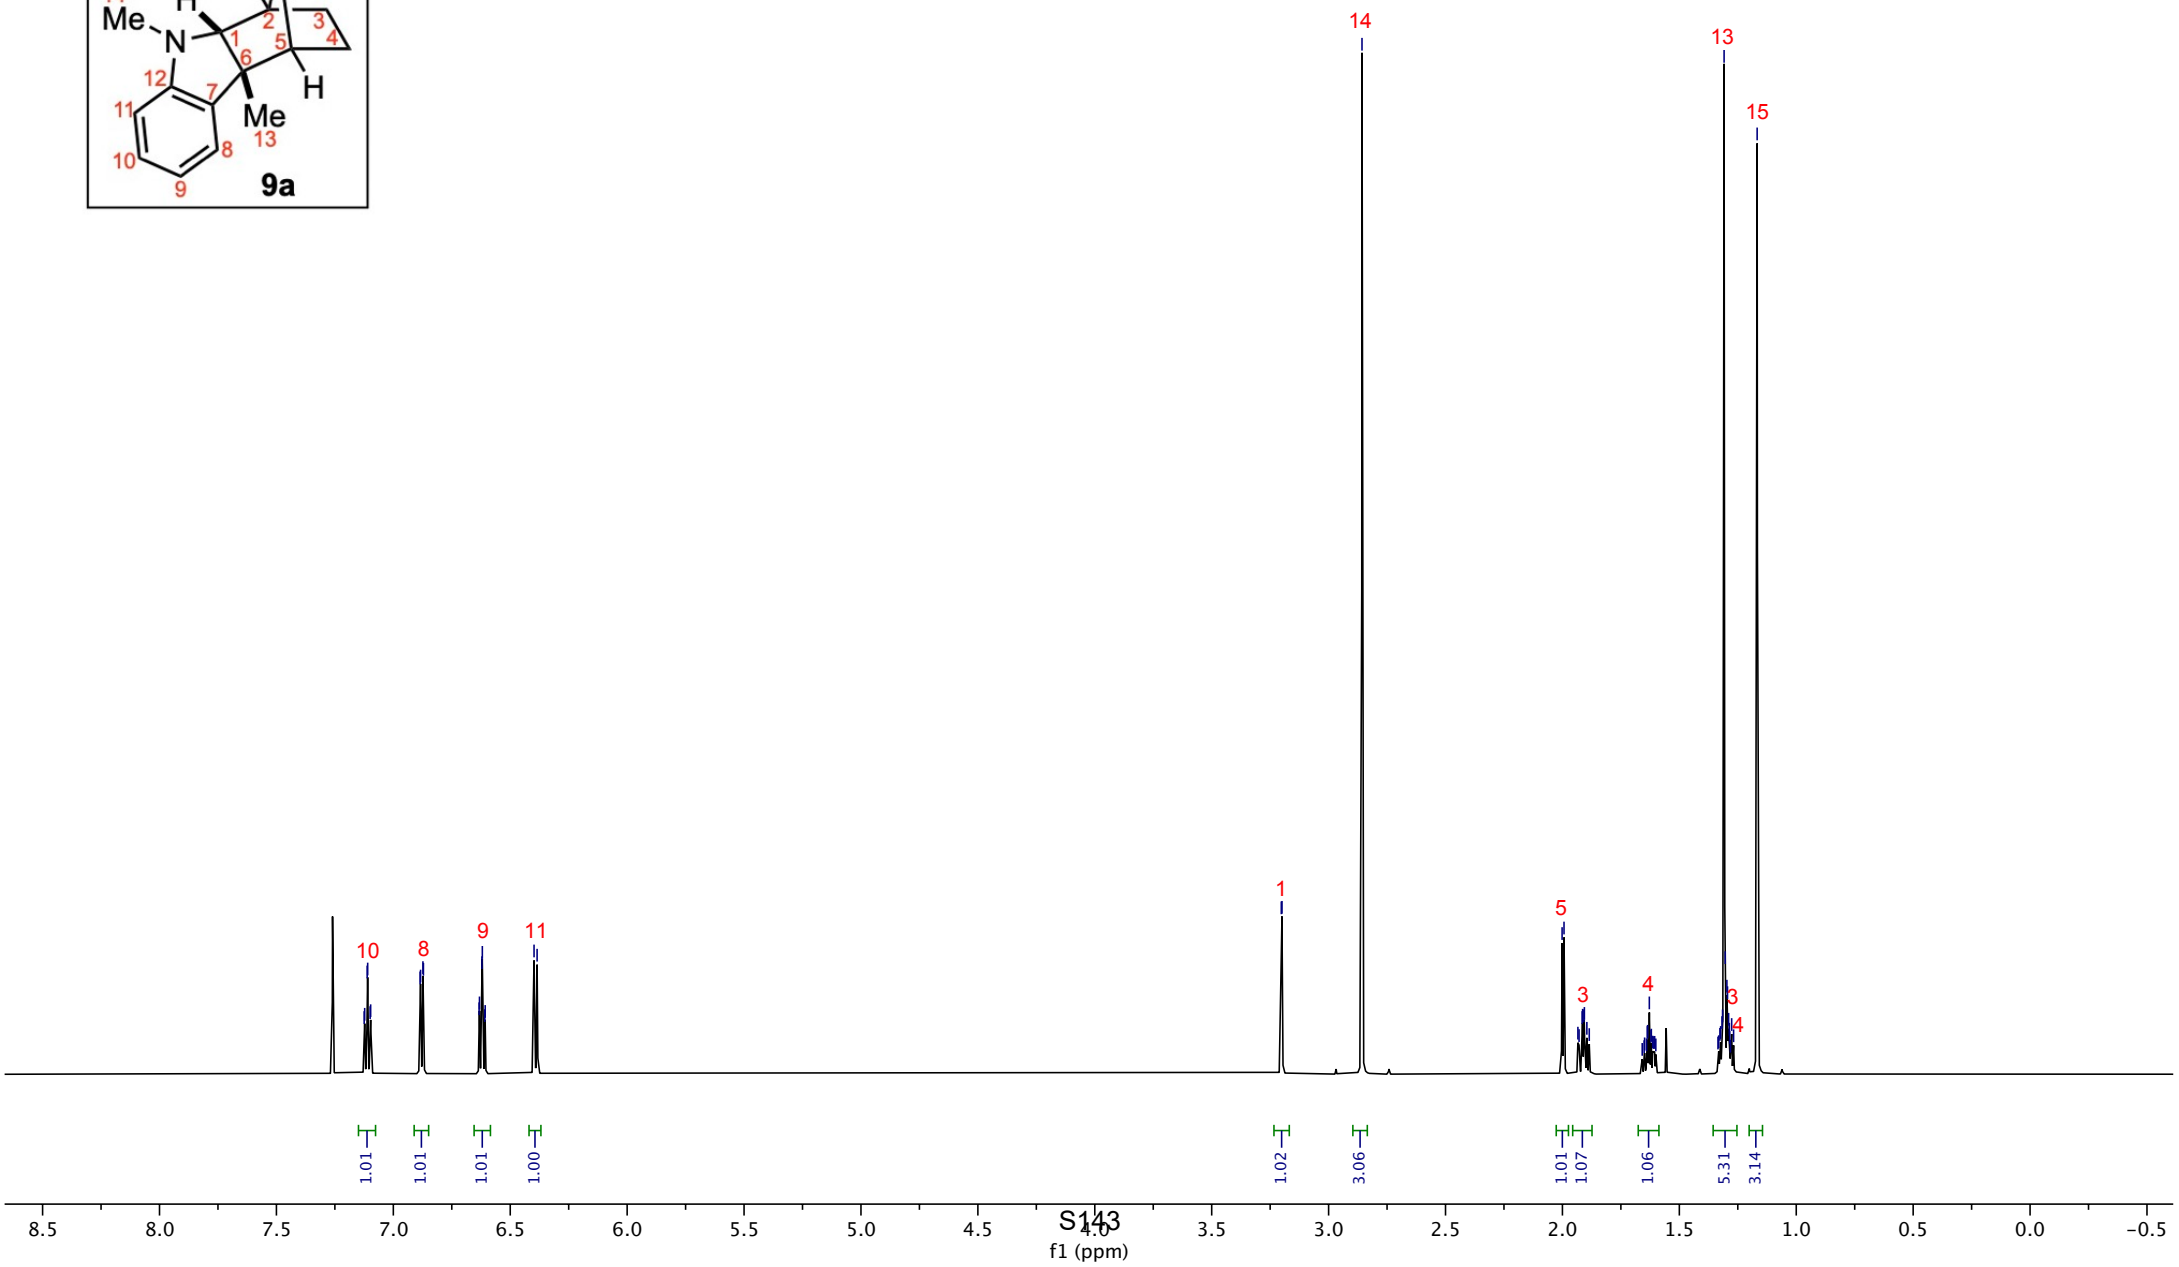





— 215.92

— 154.05

— 132.08

— 128.79

— 124.43

— 117.13

— 105.62

— 77.86

— 50.22

— 48.33

— 48.03

— 35.07

— 28.28

— 23.62

— 20.04

— 15.02

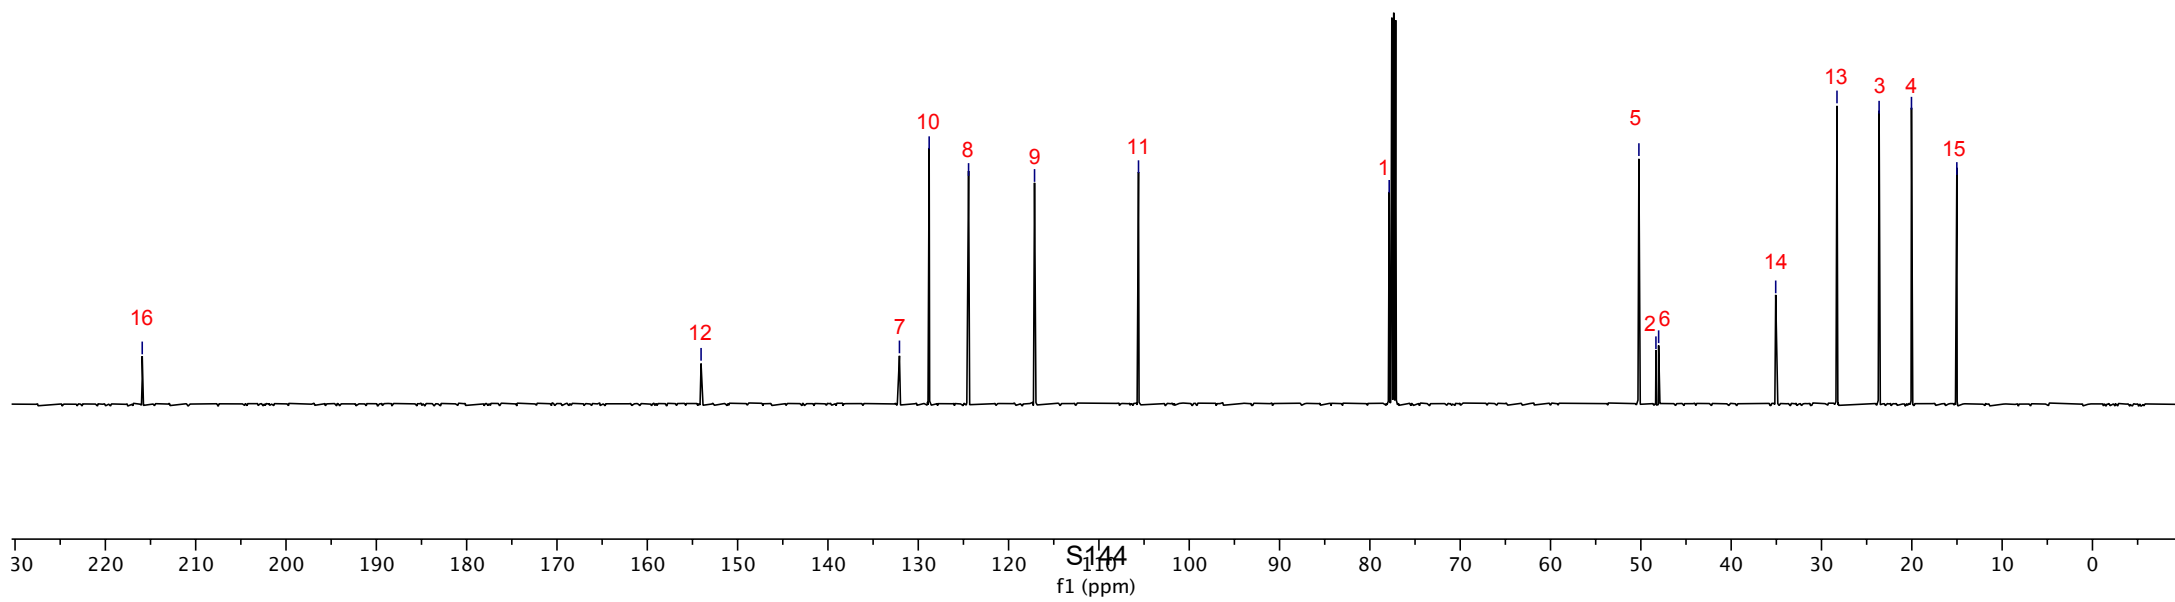

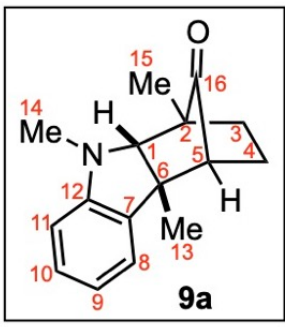

COSY

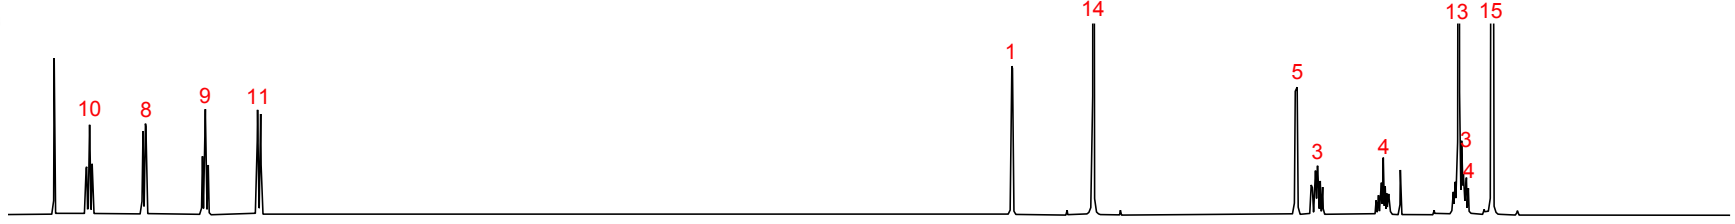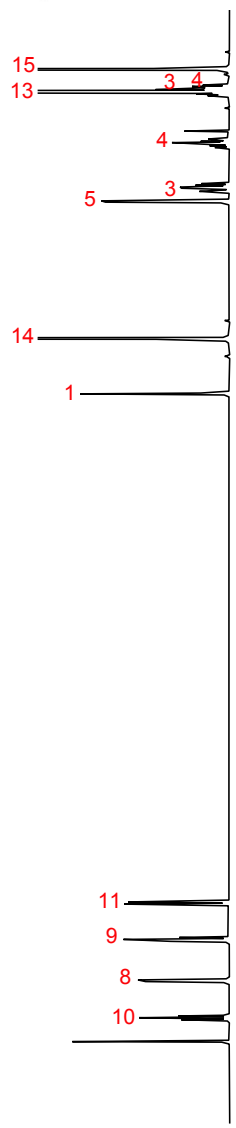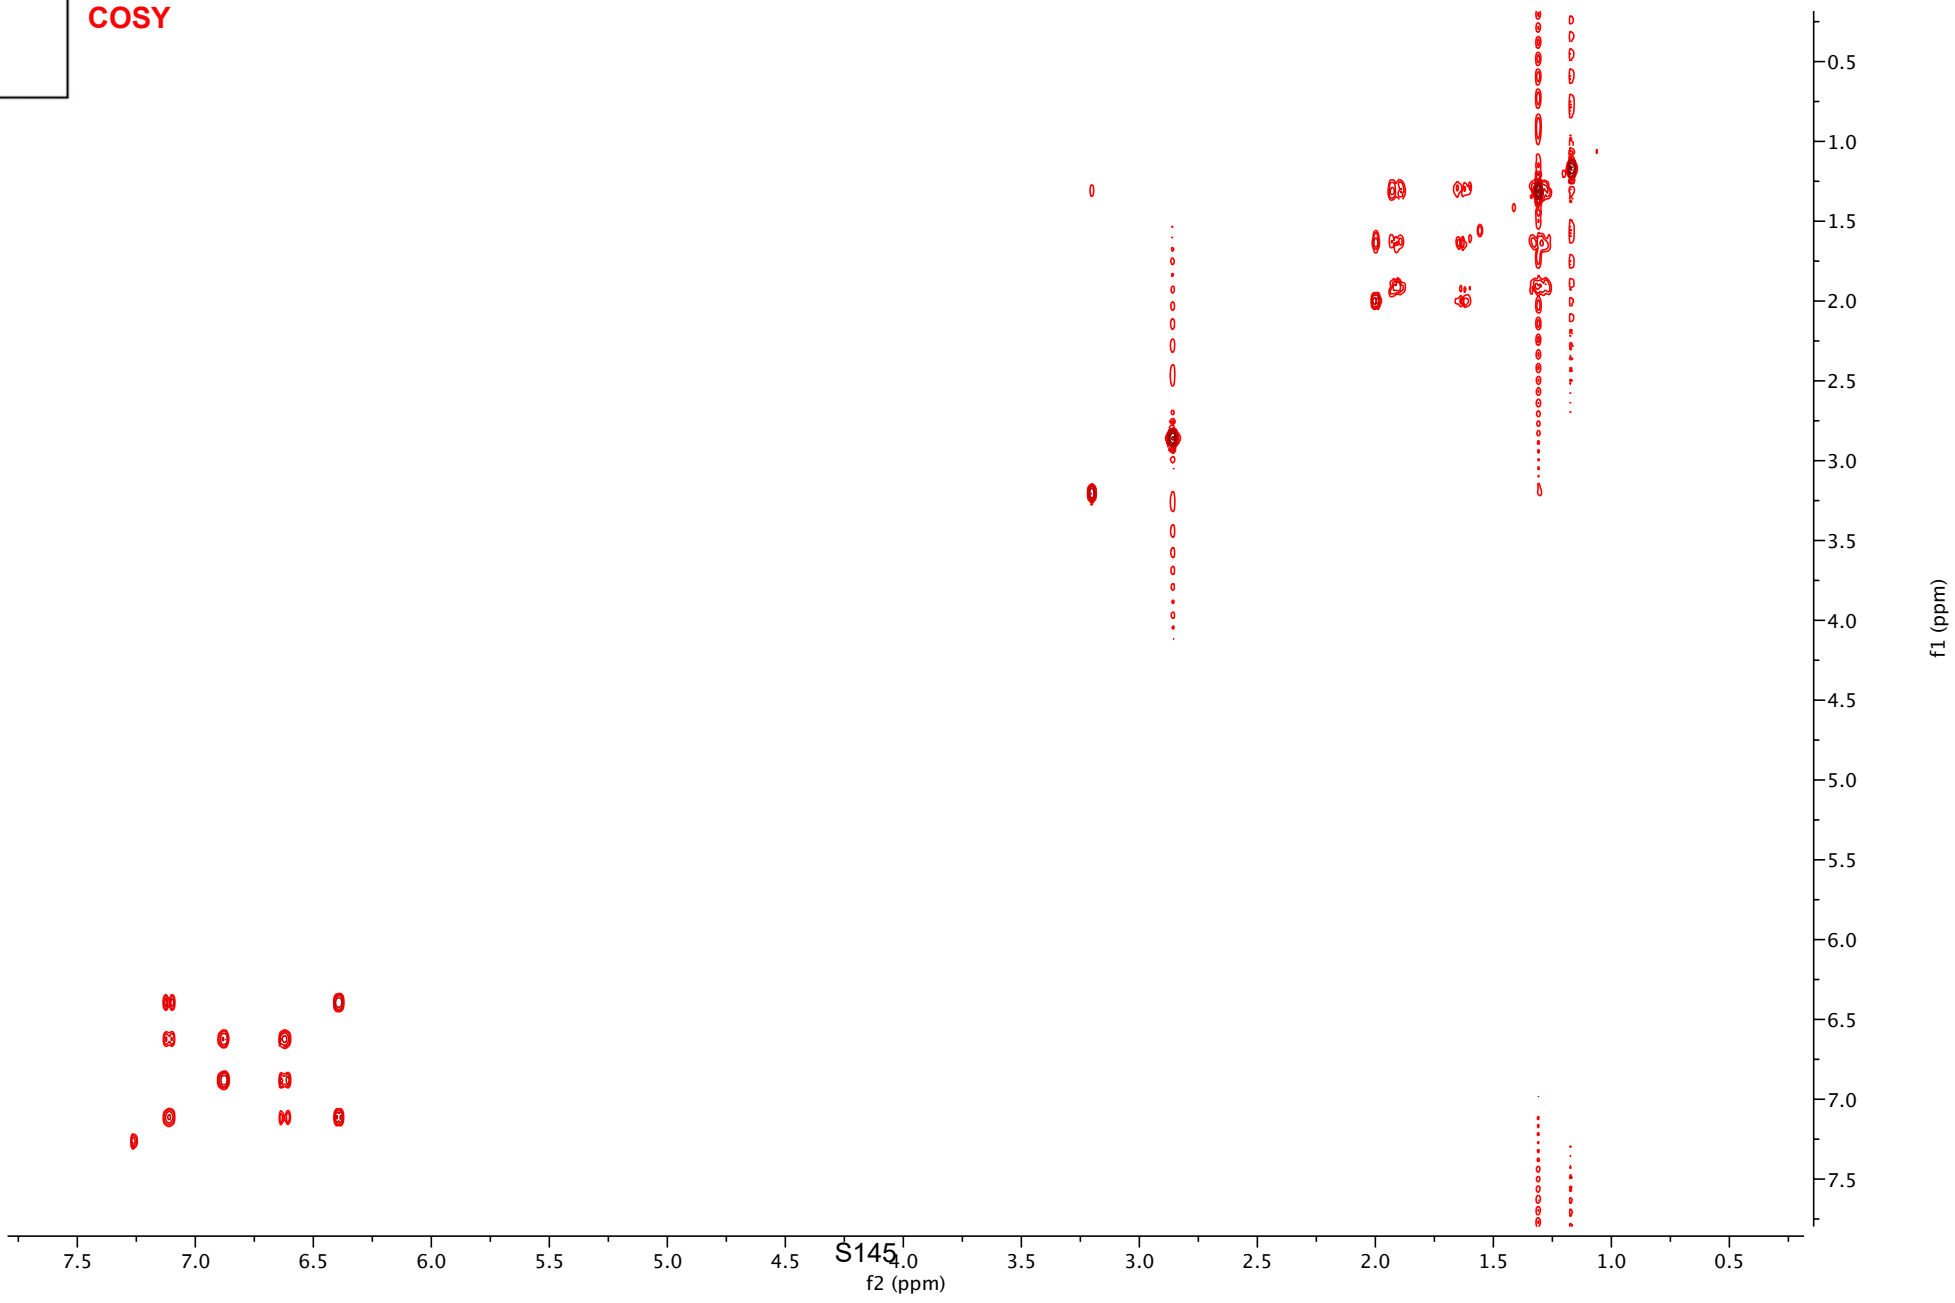

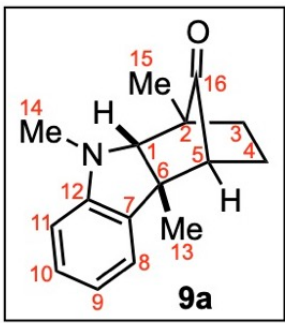

HSQC

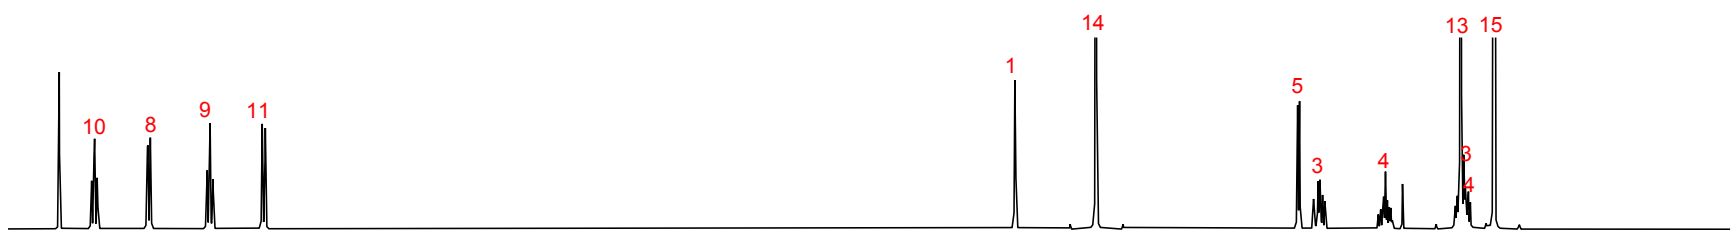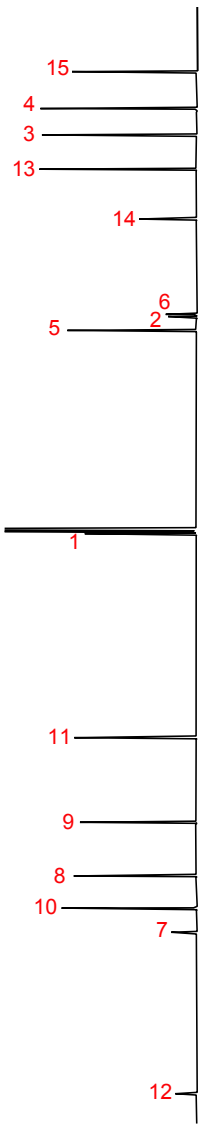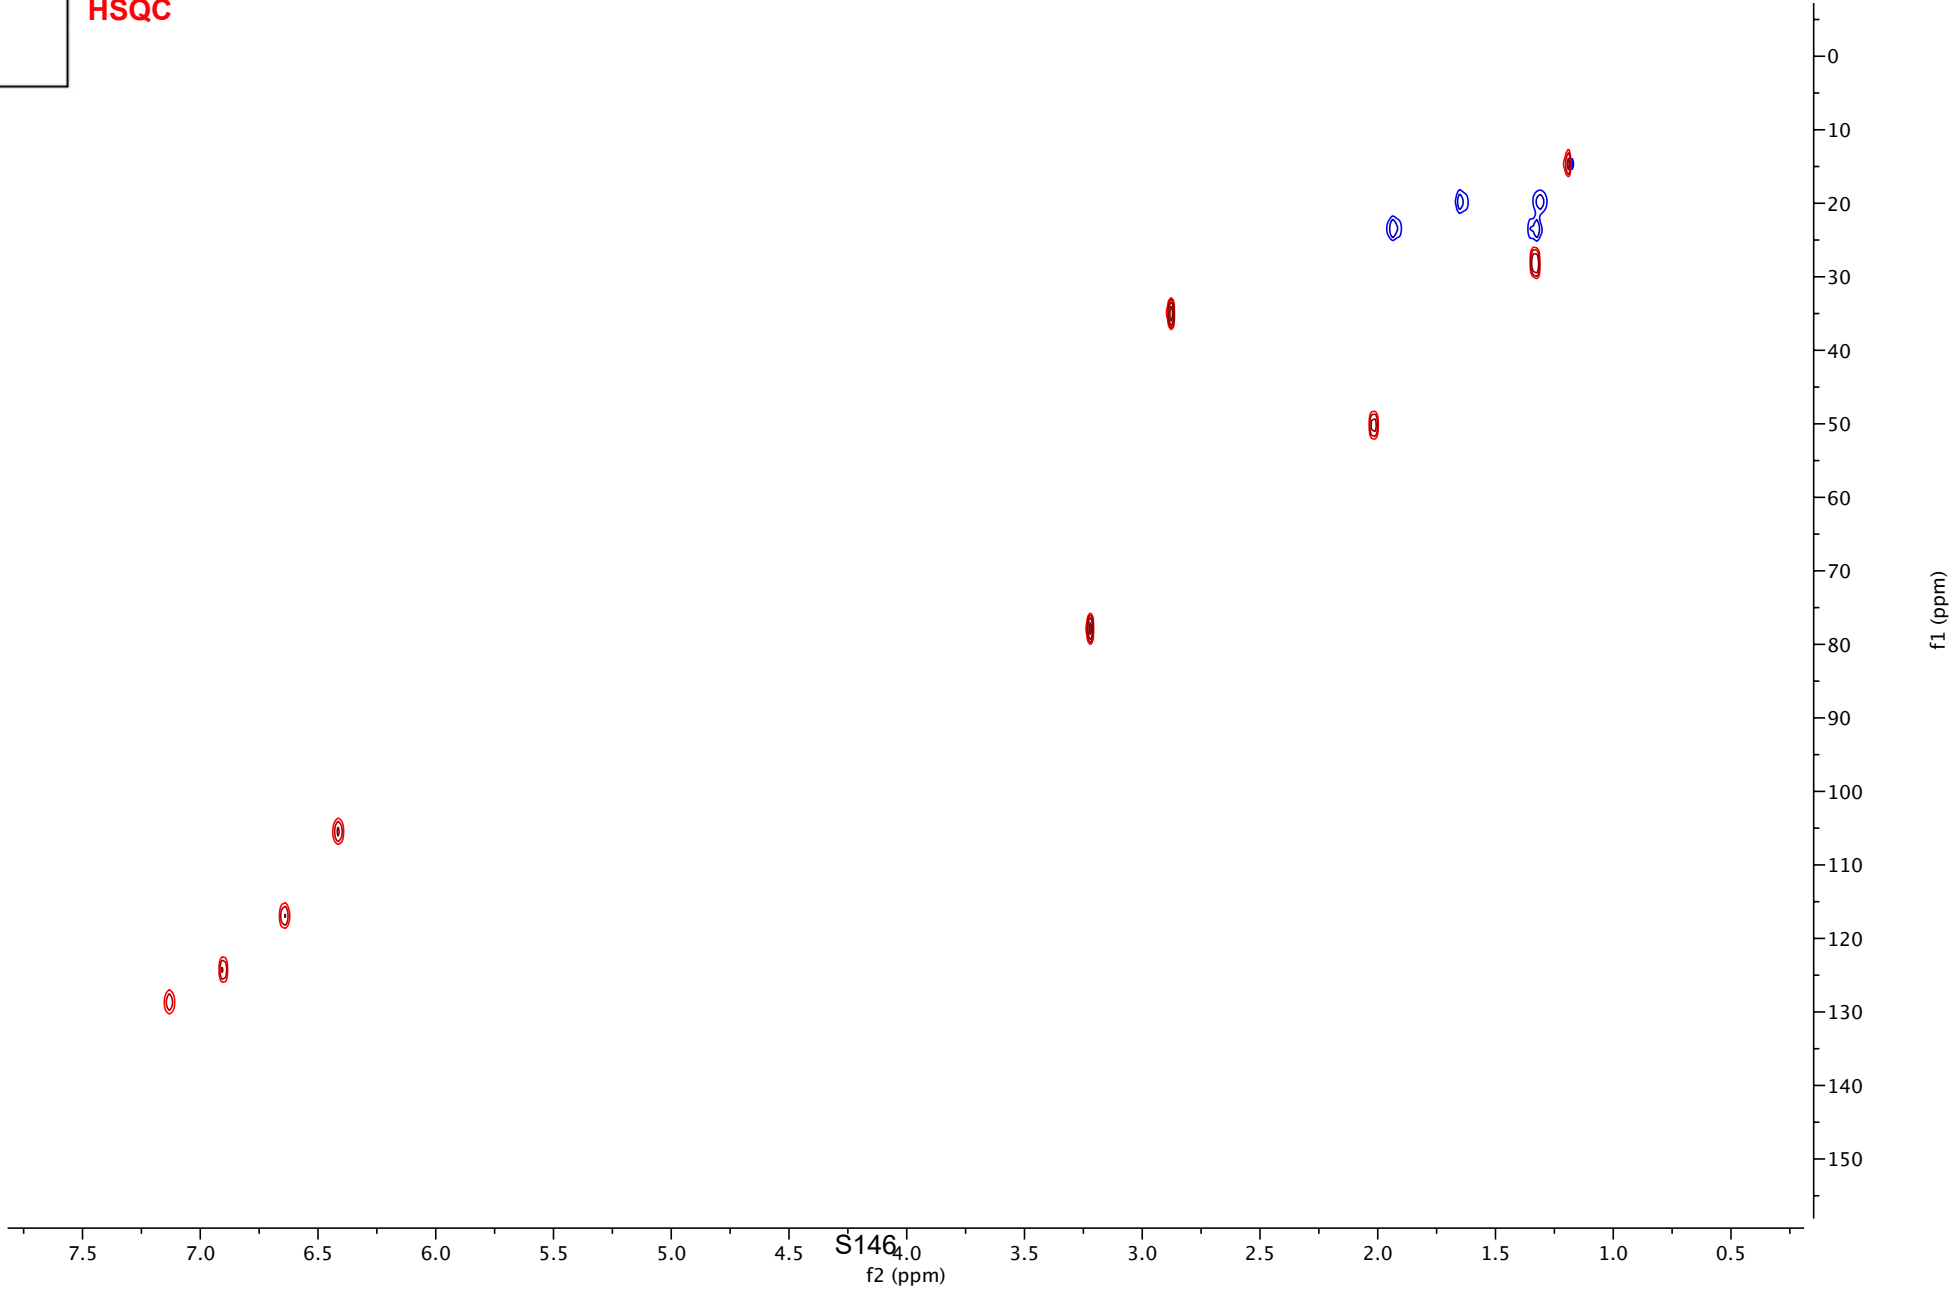

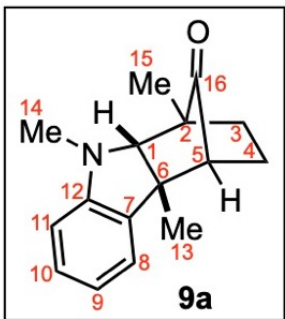

HMBC

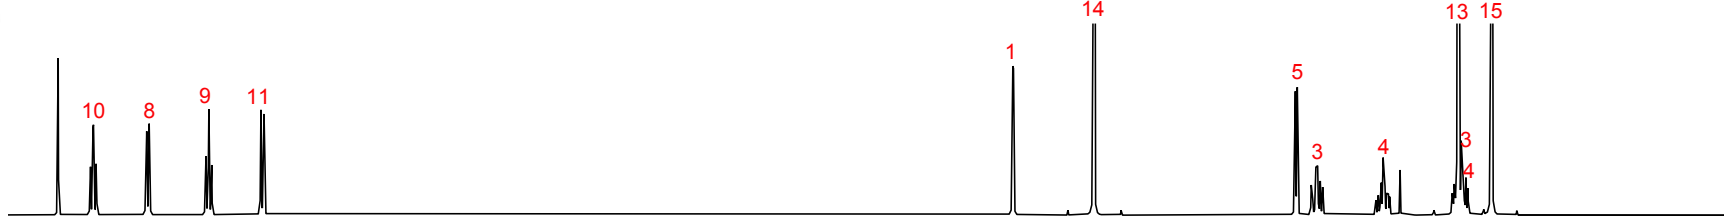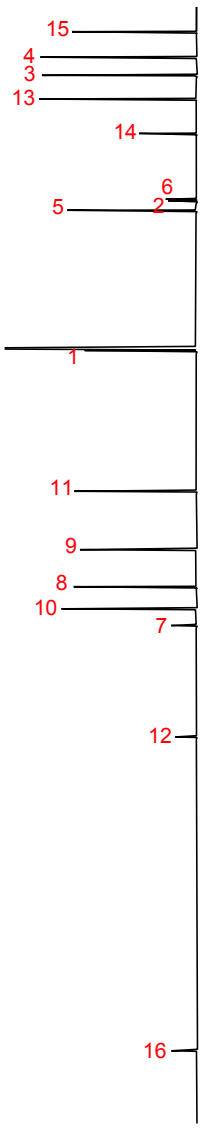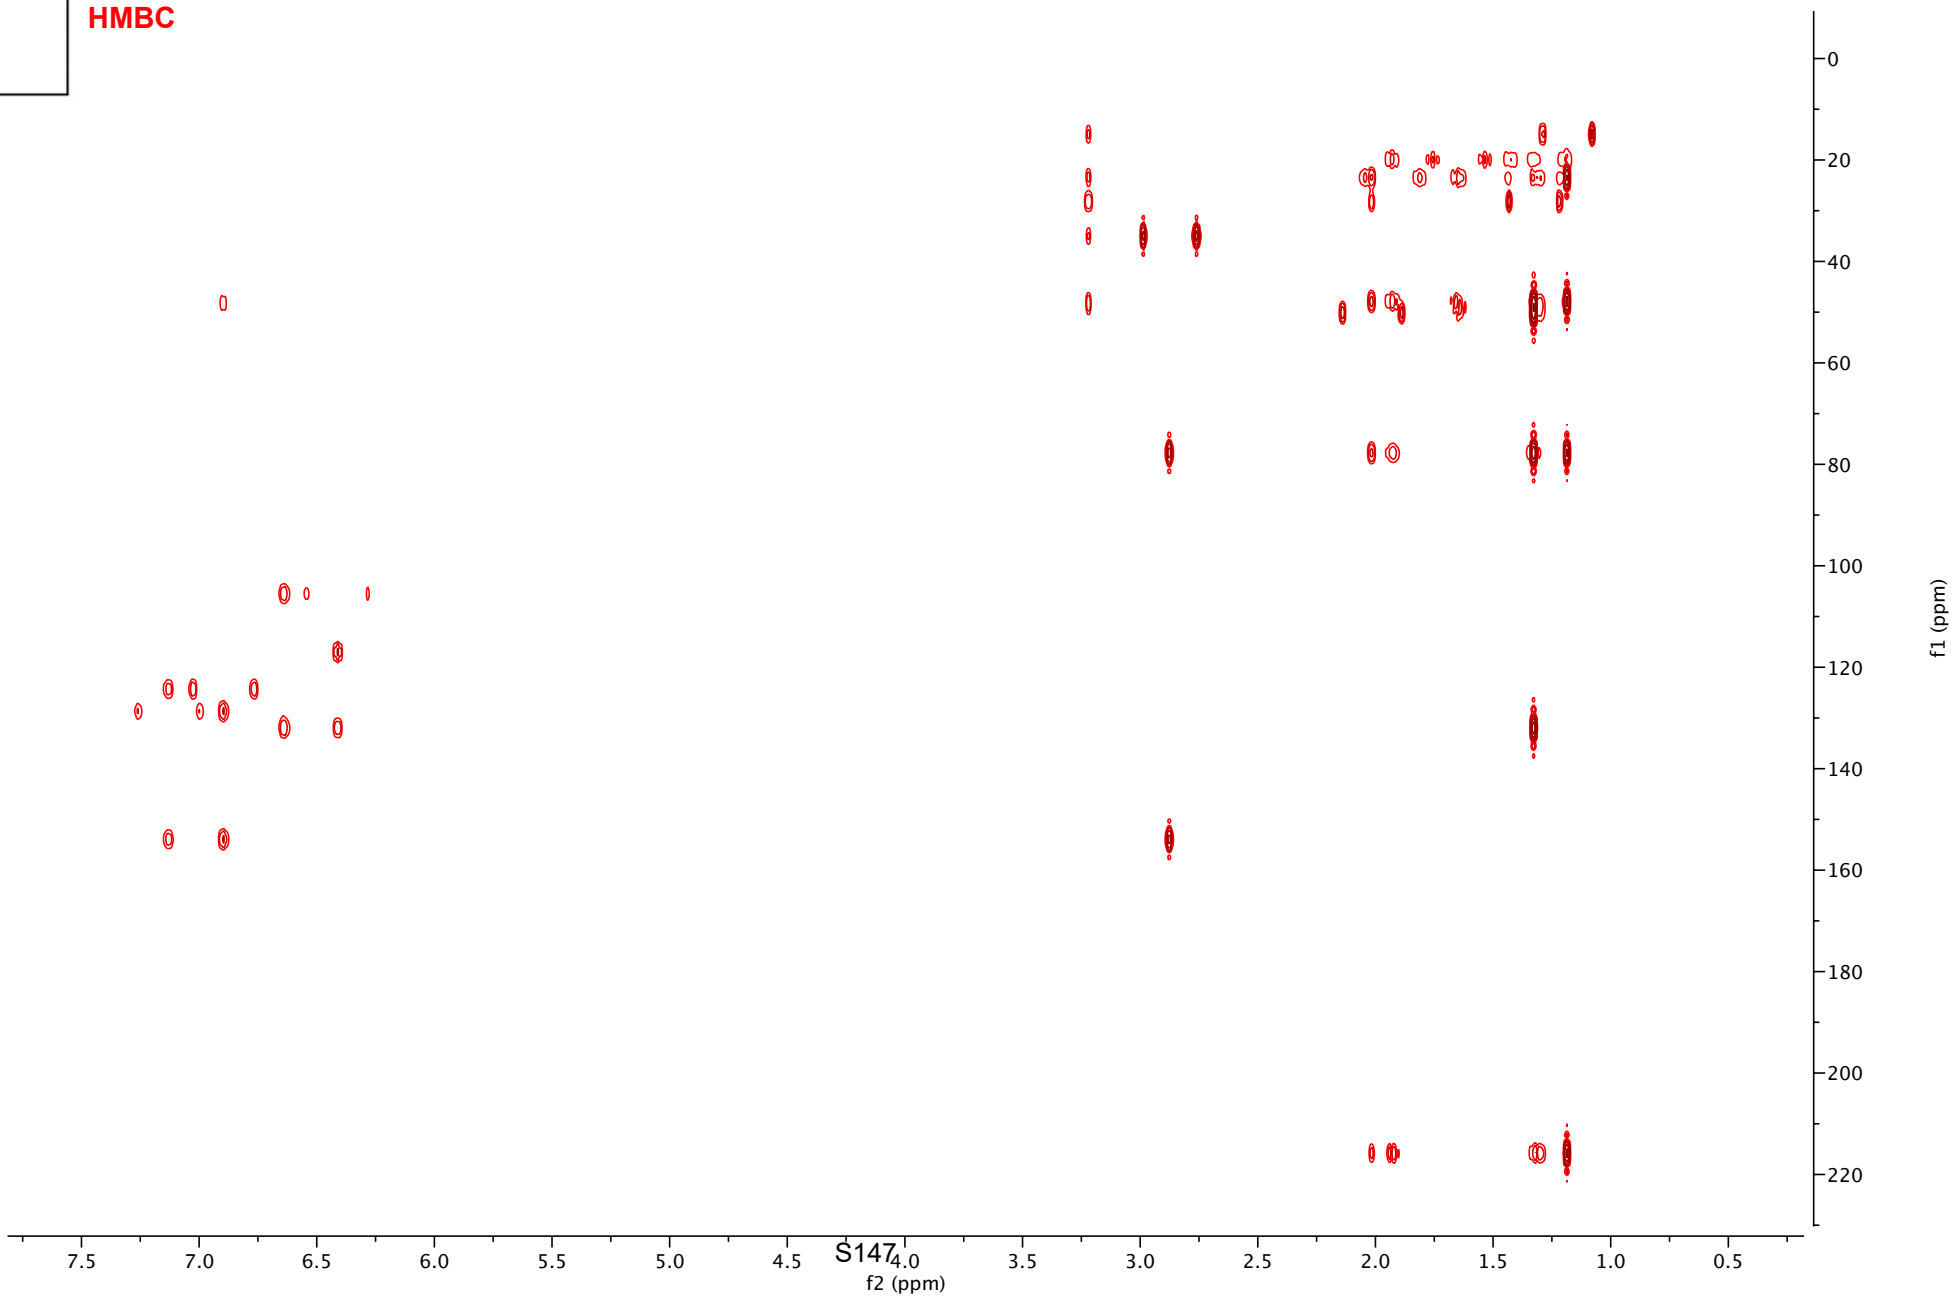



**NOESY**

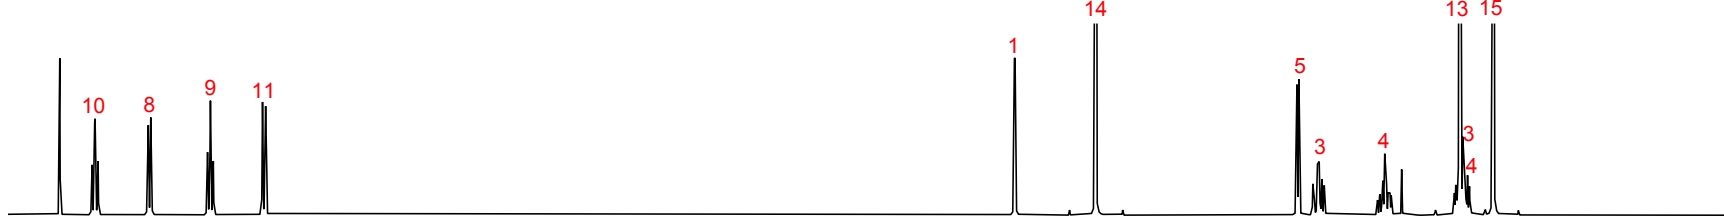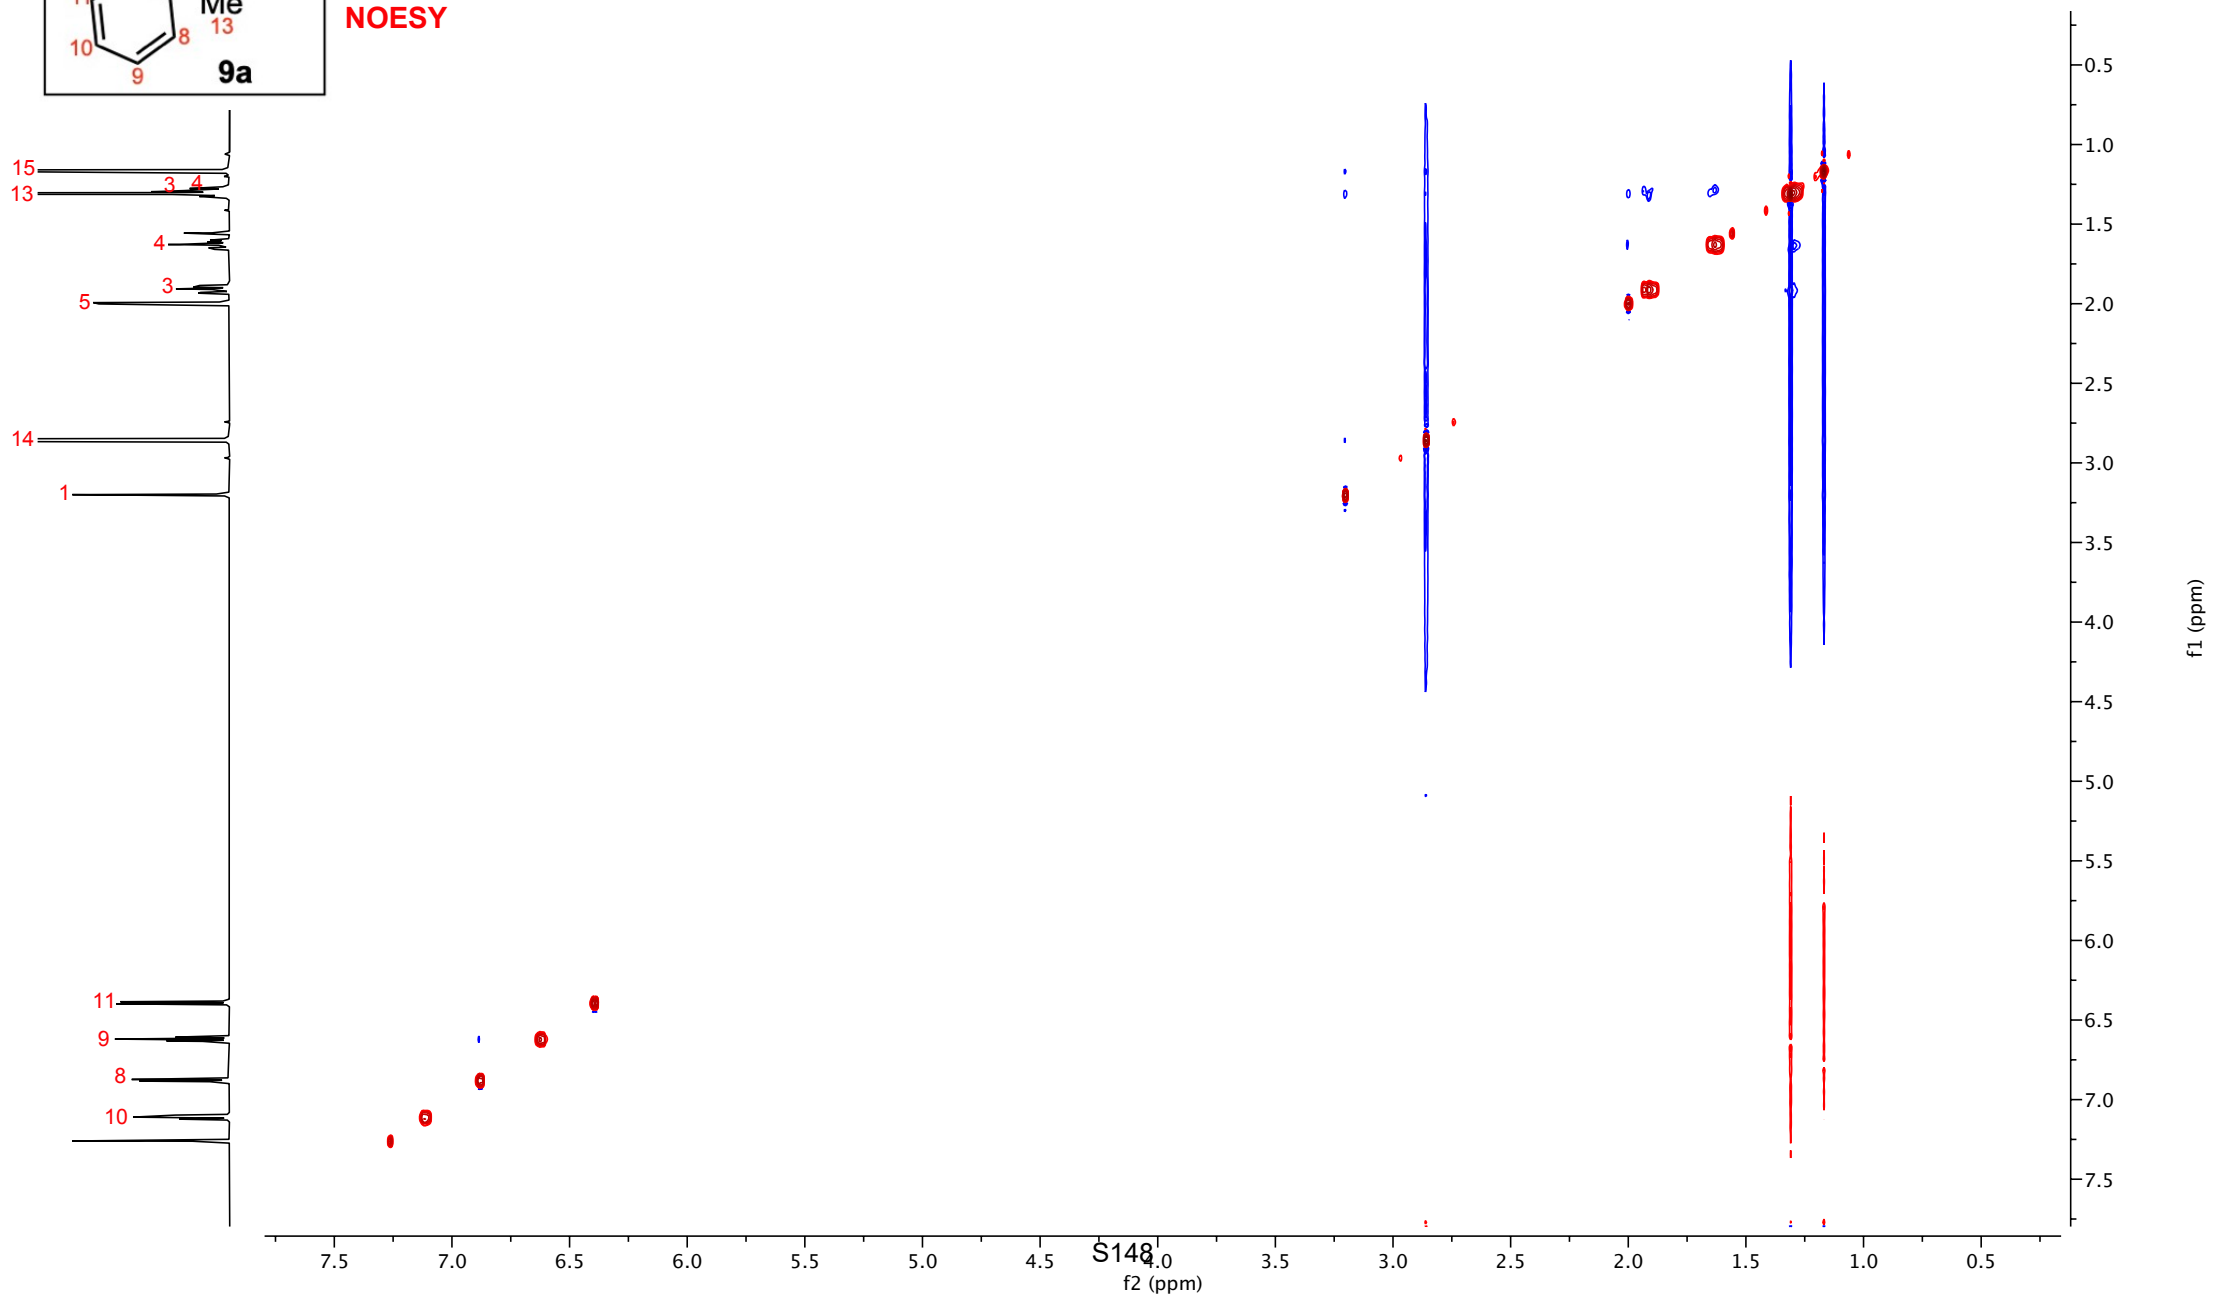

S148

7.05  
7.04  
7.03  
7.03  
7.02  
7.02  
6.89  
6.88  
6.88  
6.82  
6.82  
6.61  
6.61  
6.60  
6.60  
6.33  
6.31

3.00  
2.87  
2.10  
2.09  
2.01  
1.99  
1.99  
1.98  
1.97  
1.97  
1.96  
1.95  
1.93  
1.81  
1.81  
1.80  
1.80  
1.79  
1.79  
1.79  
1.78  
1.78  
1.77  
1.76  
1.76  
1.69  
1.69  
1.67  
1.66  
1.65  
1.65  
1.64  
1.63  
1.62  
1.45

1.08

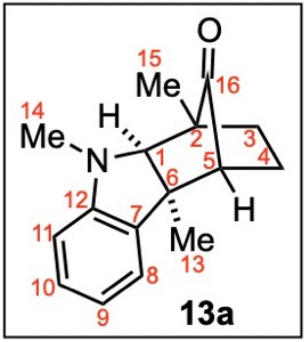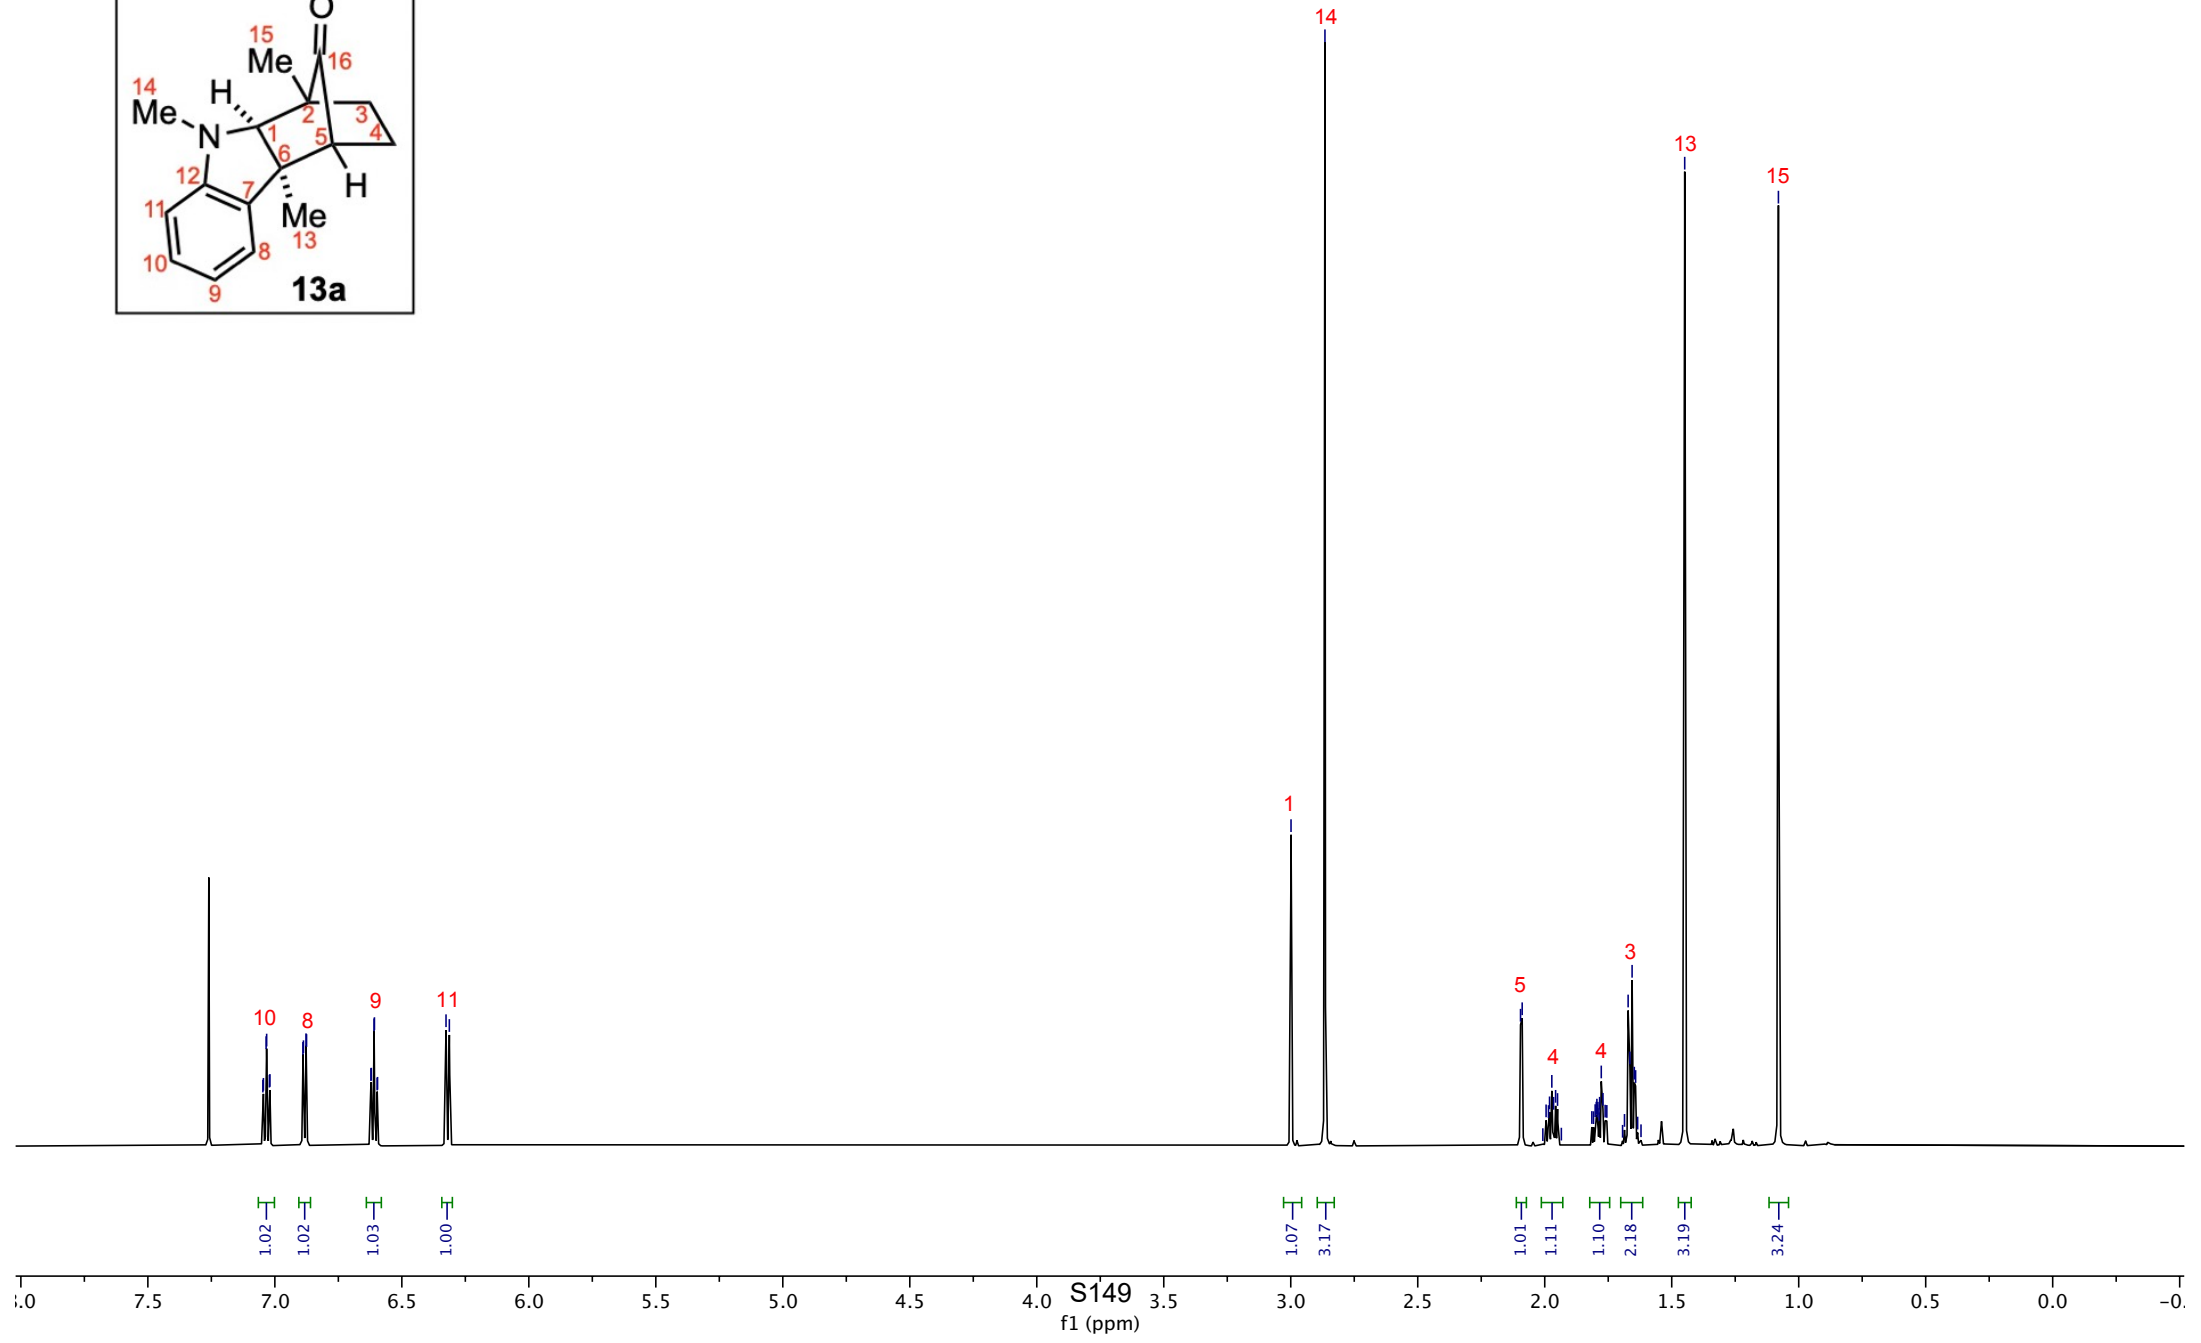

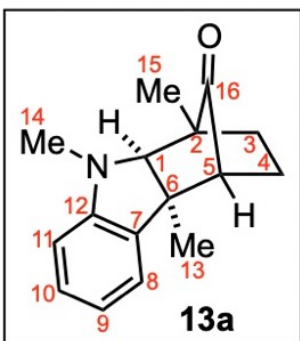

— 215.66

— 151.80

— 135.12

— 128.84

— 123.52

— 118.02

— 107.20

— 80.61

— 50.02

— 49.41

— 47.99

— 37.50

— 28.14

— 25.25

— 18.73

— 12.10

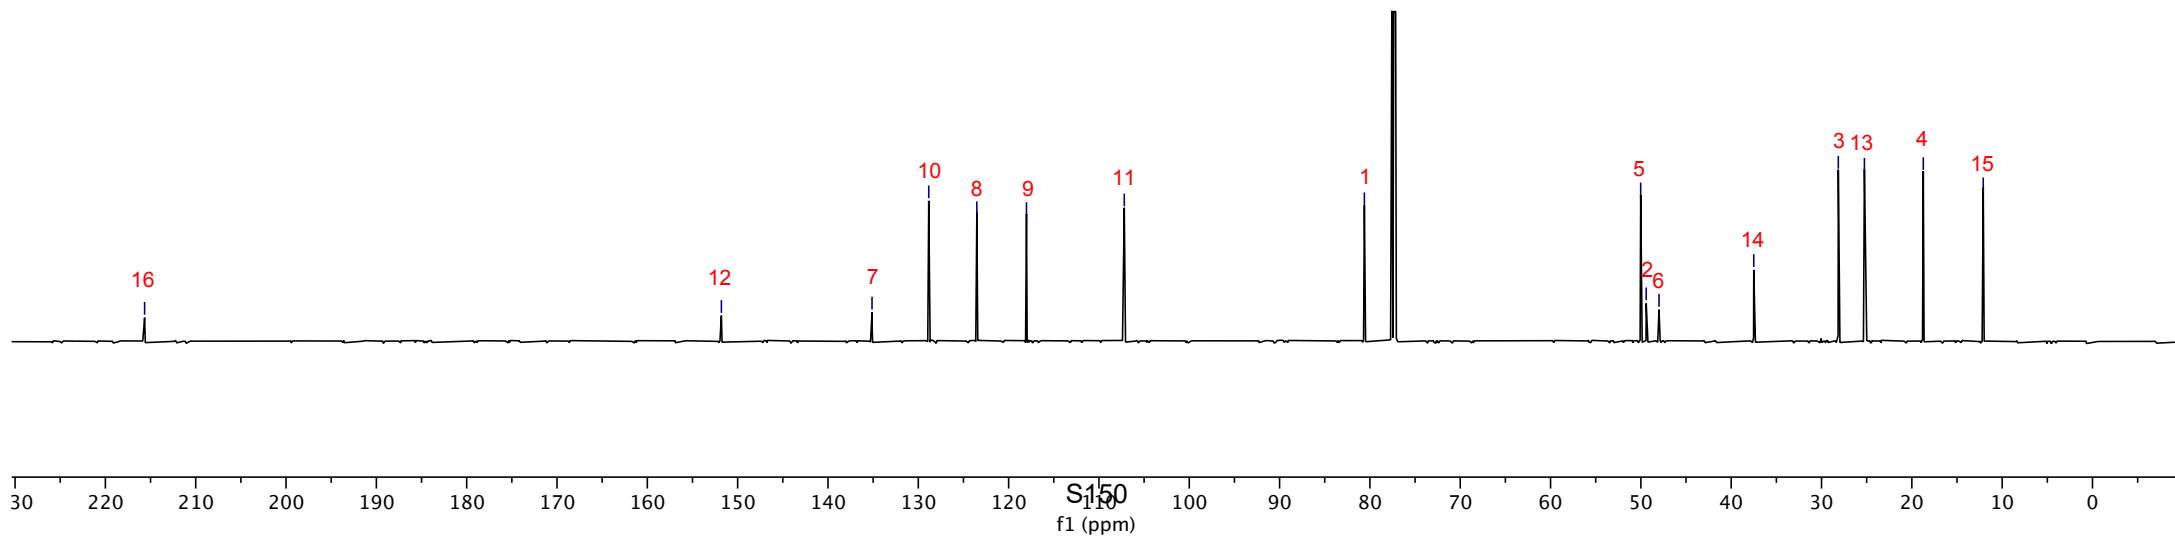

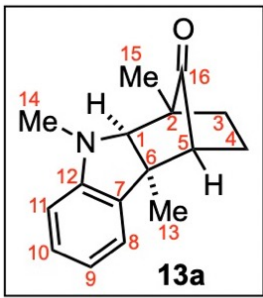

**COSY**

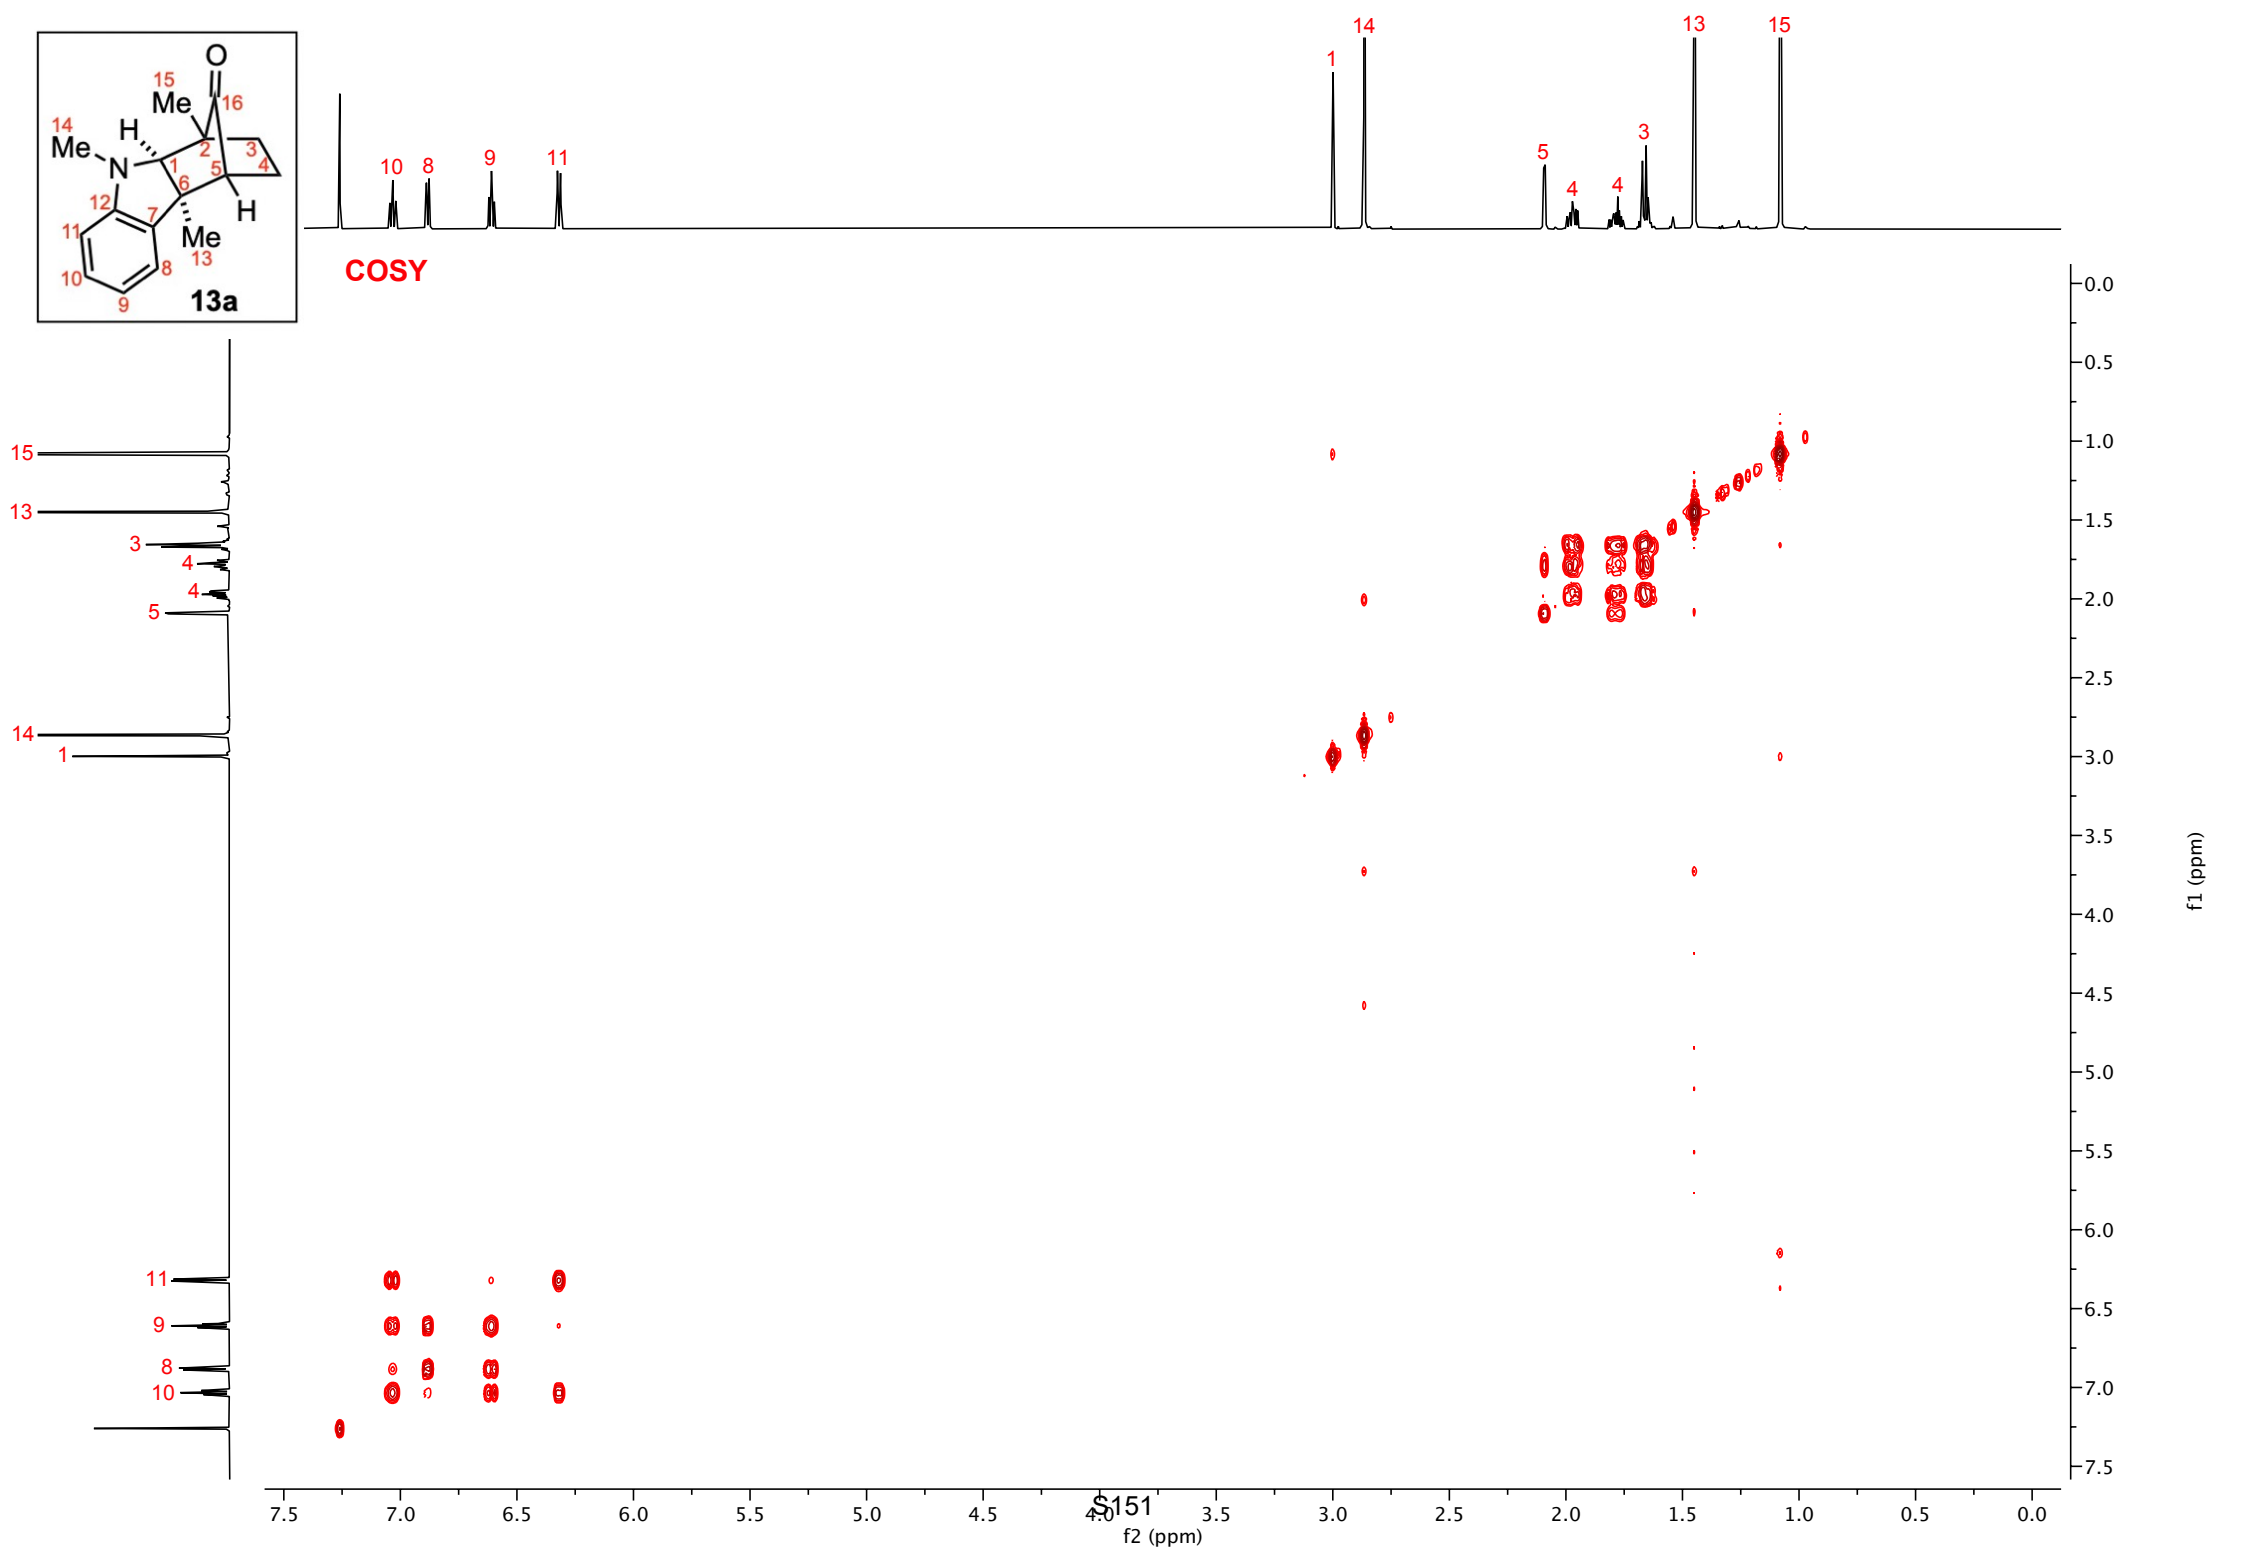



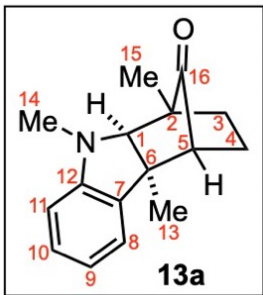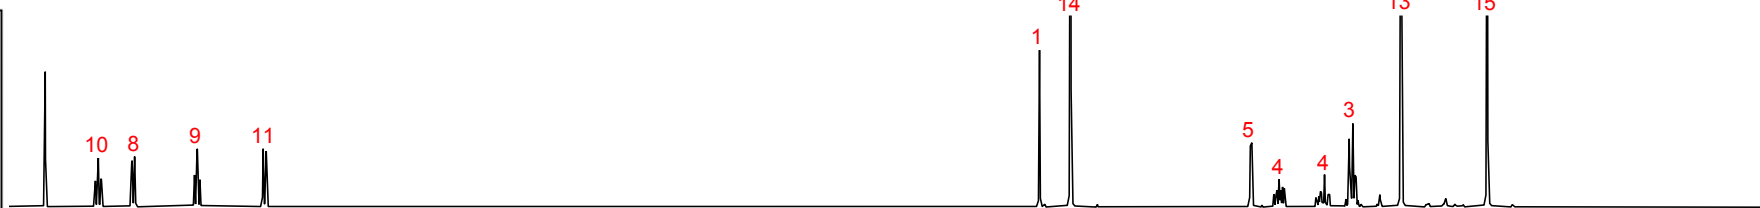

**HSQC**

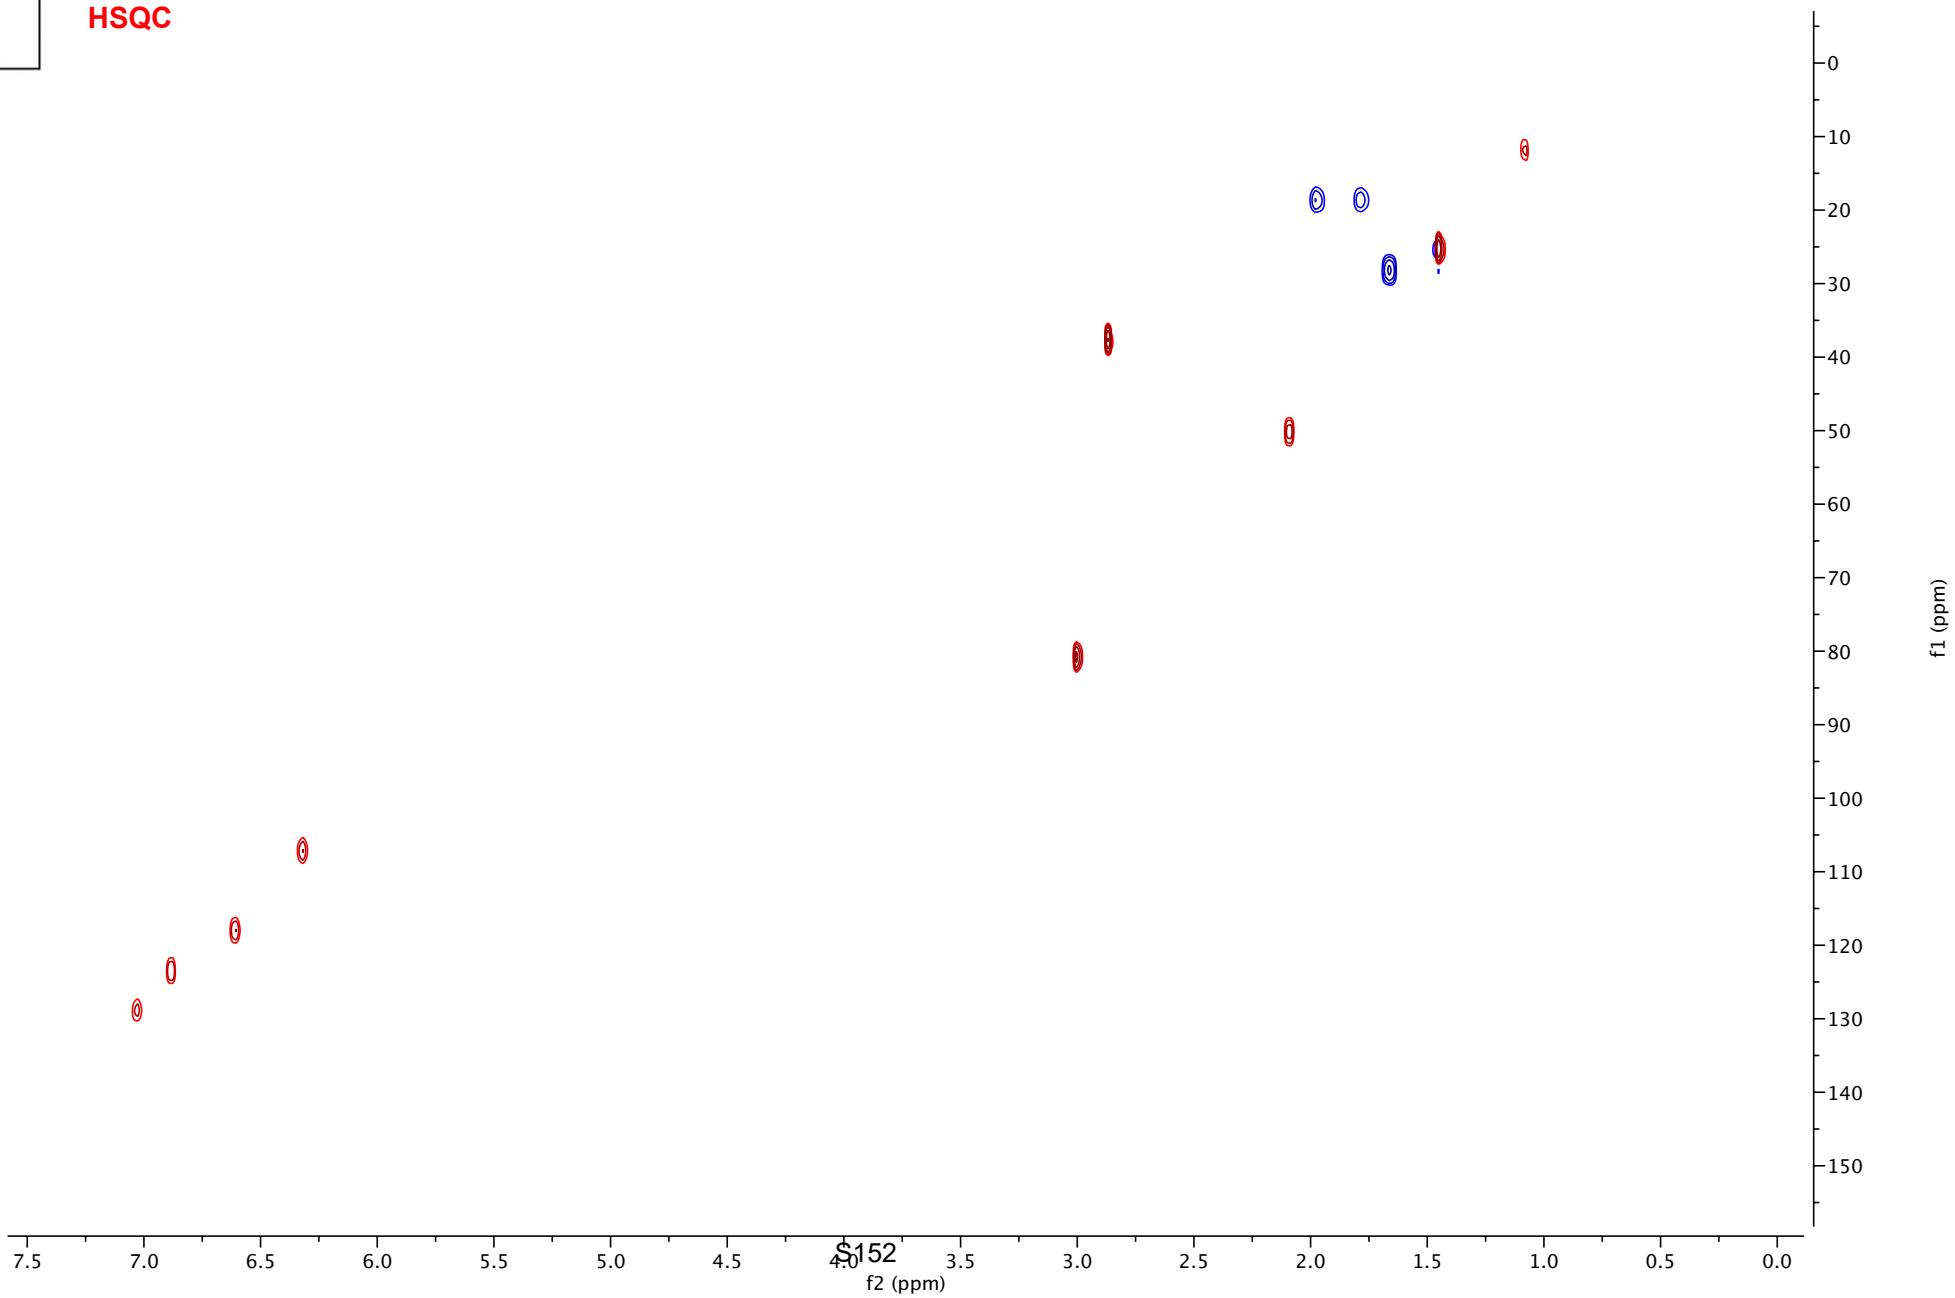

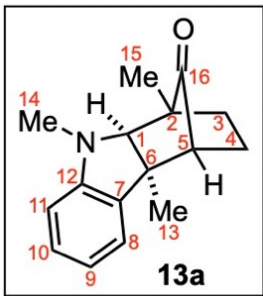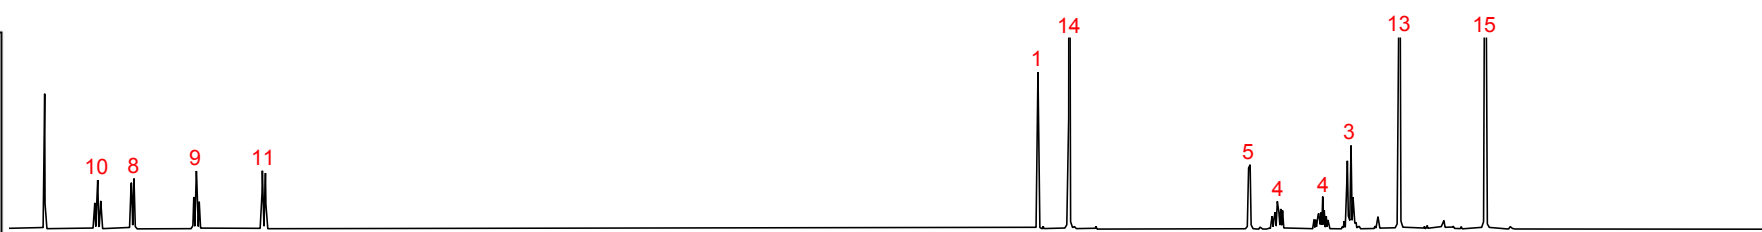

**HMBC**

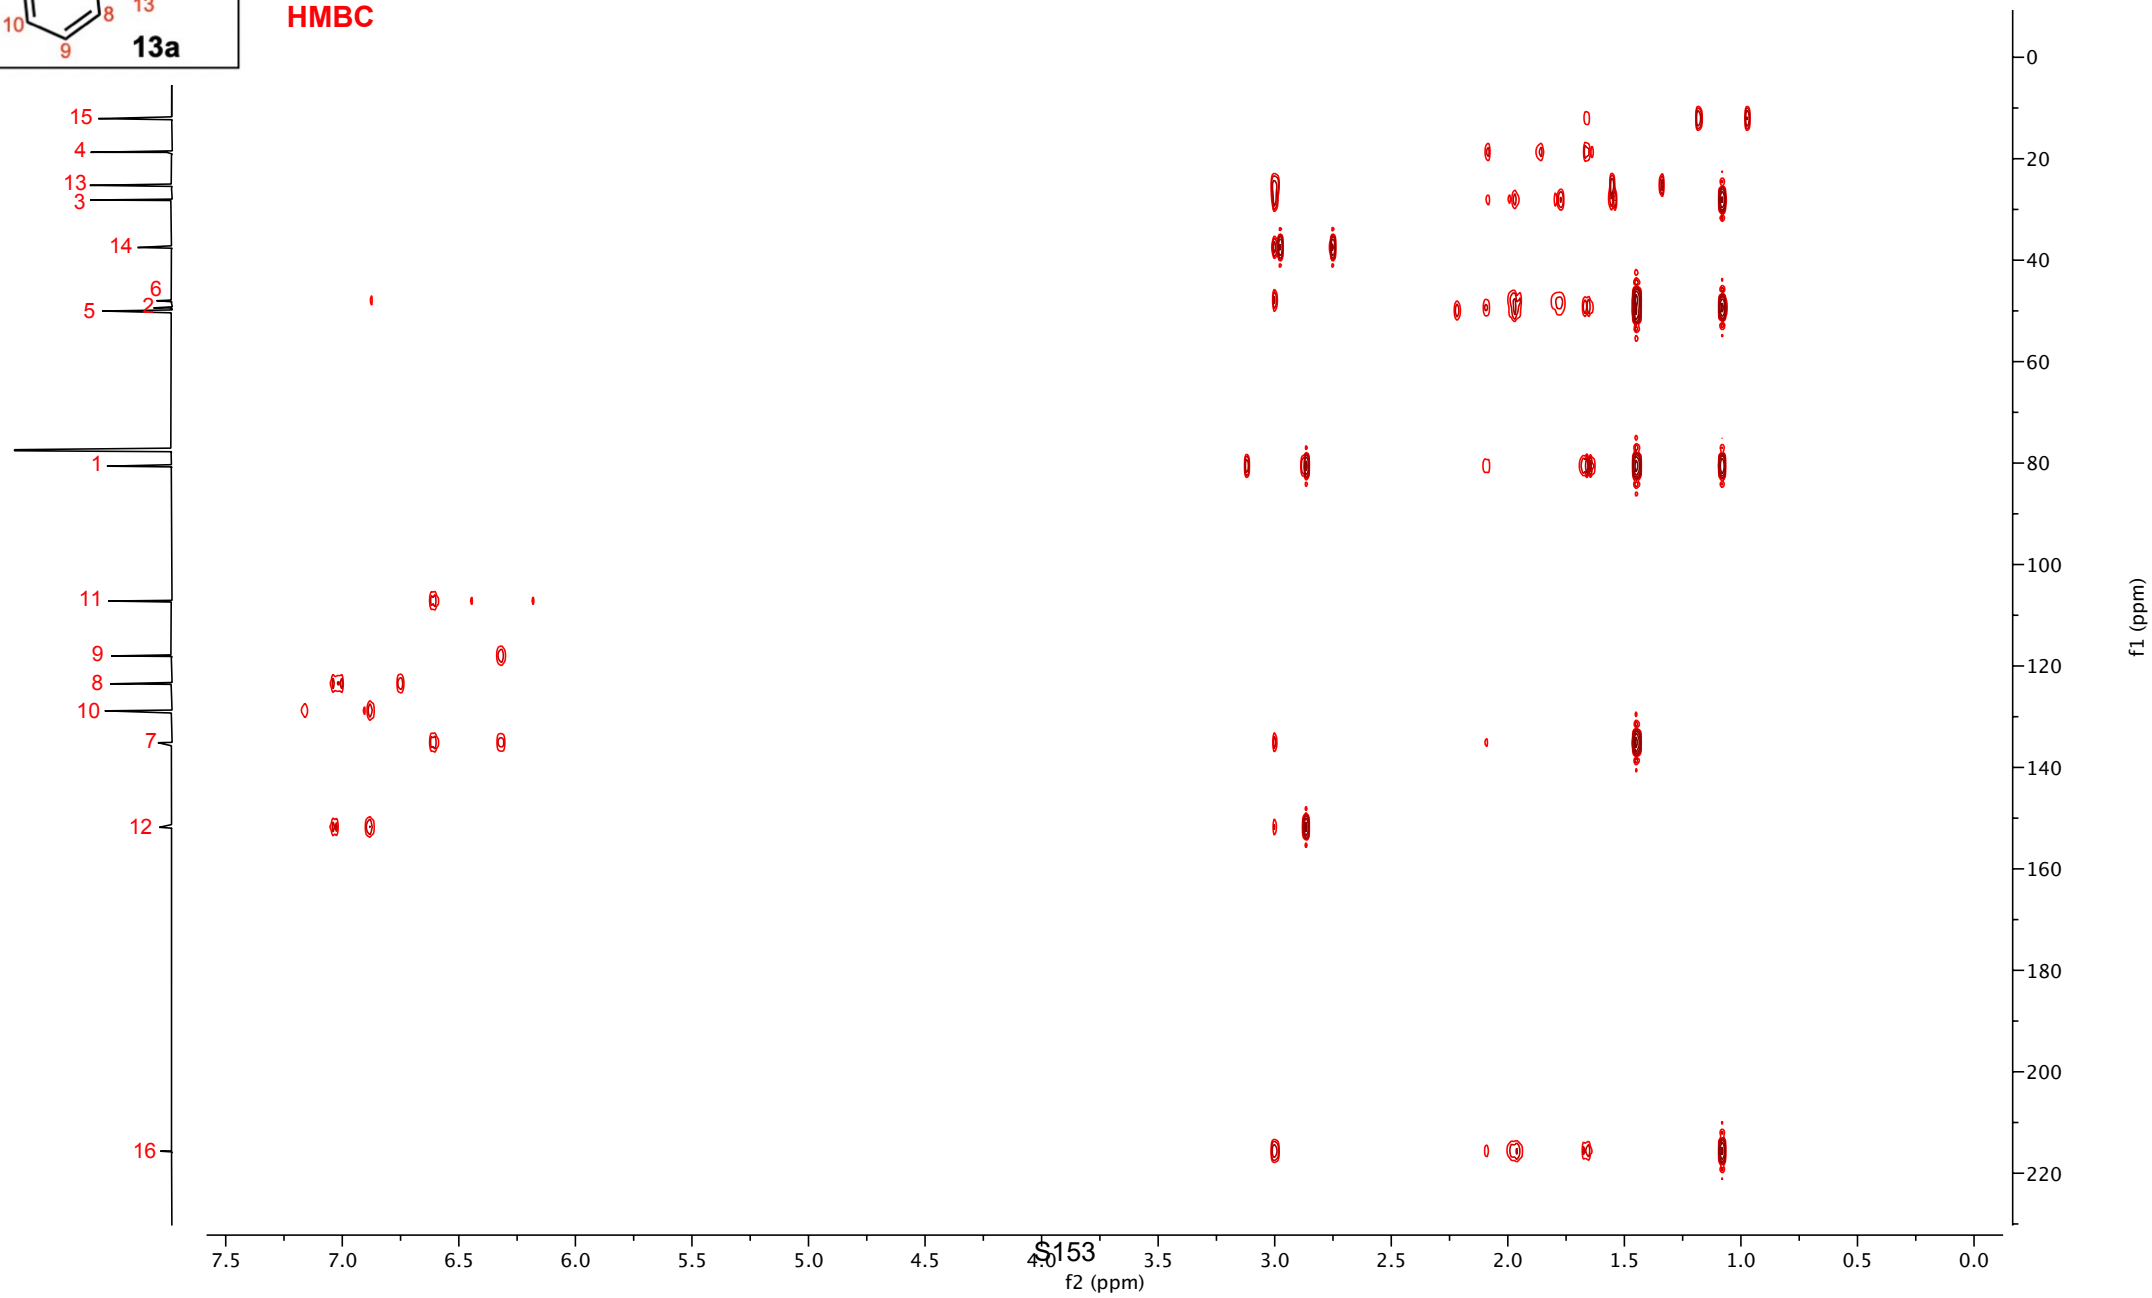

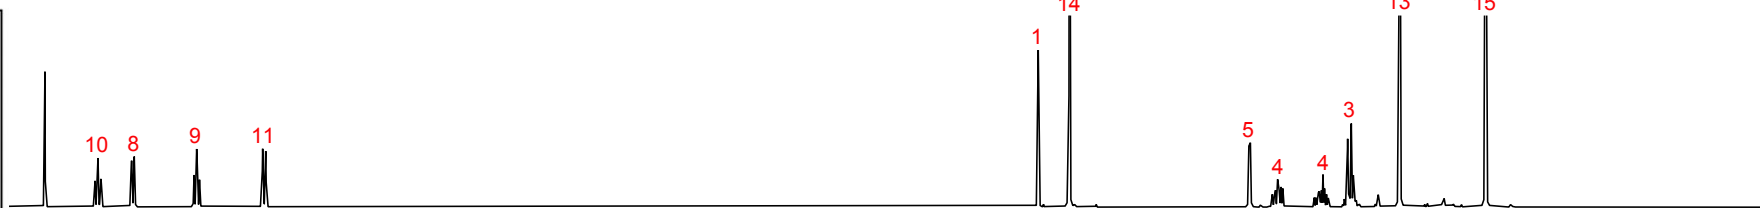

**NOESY**

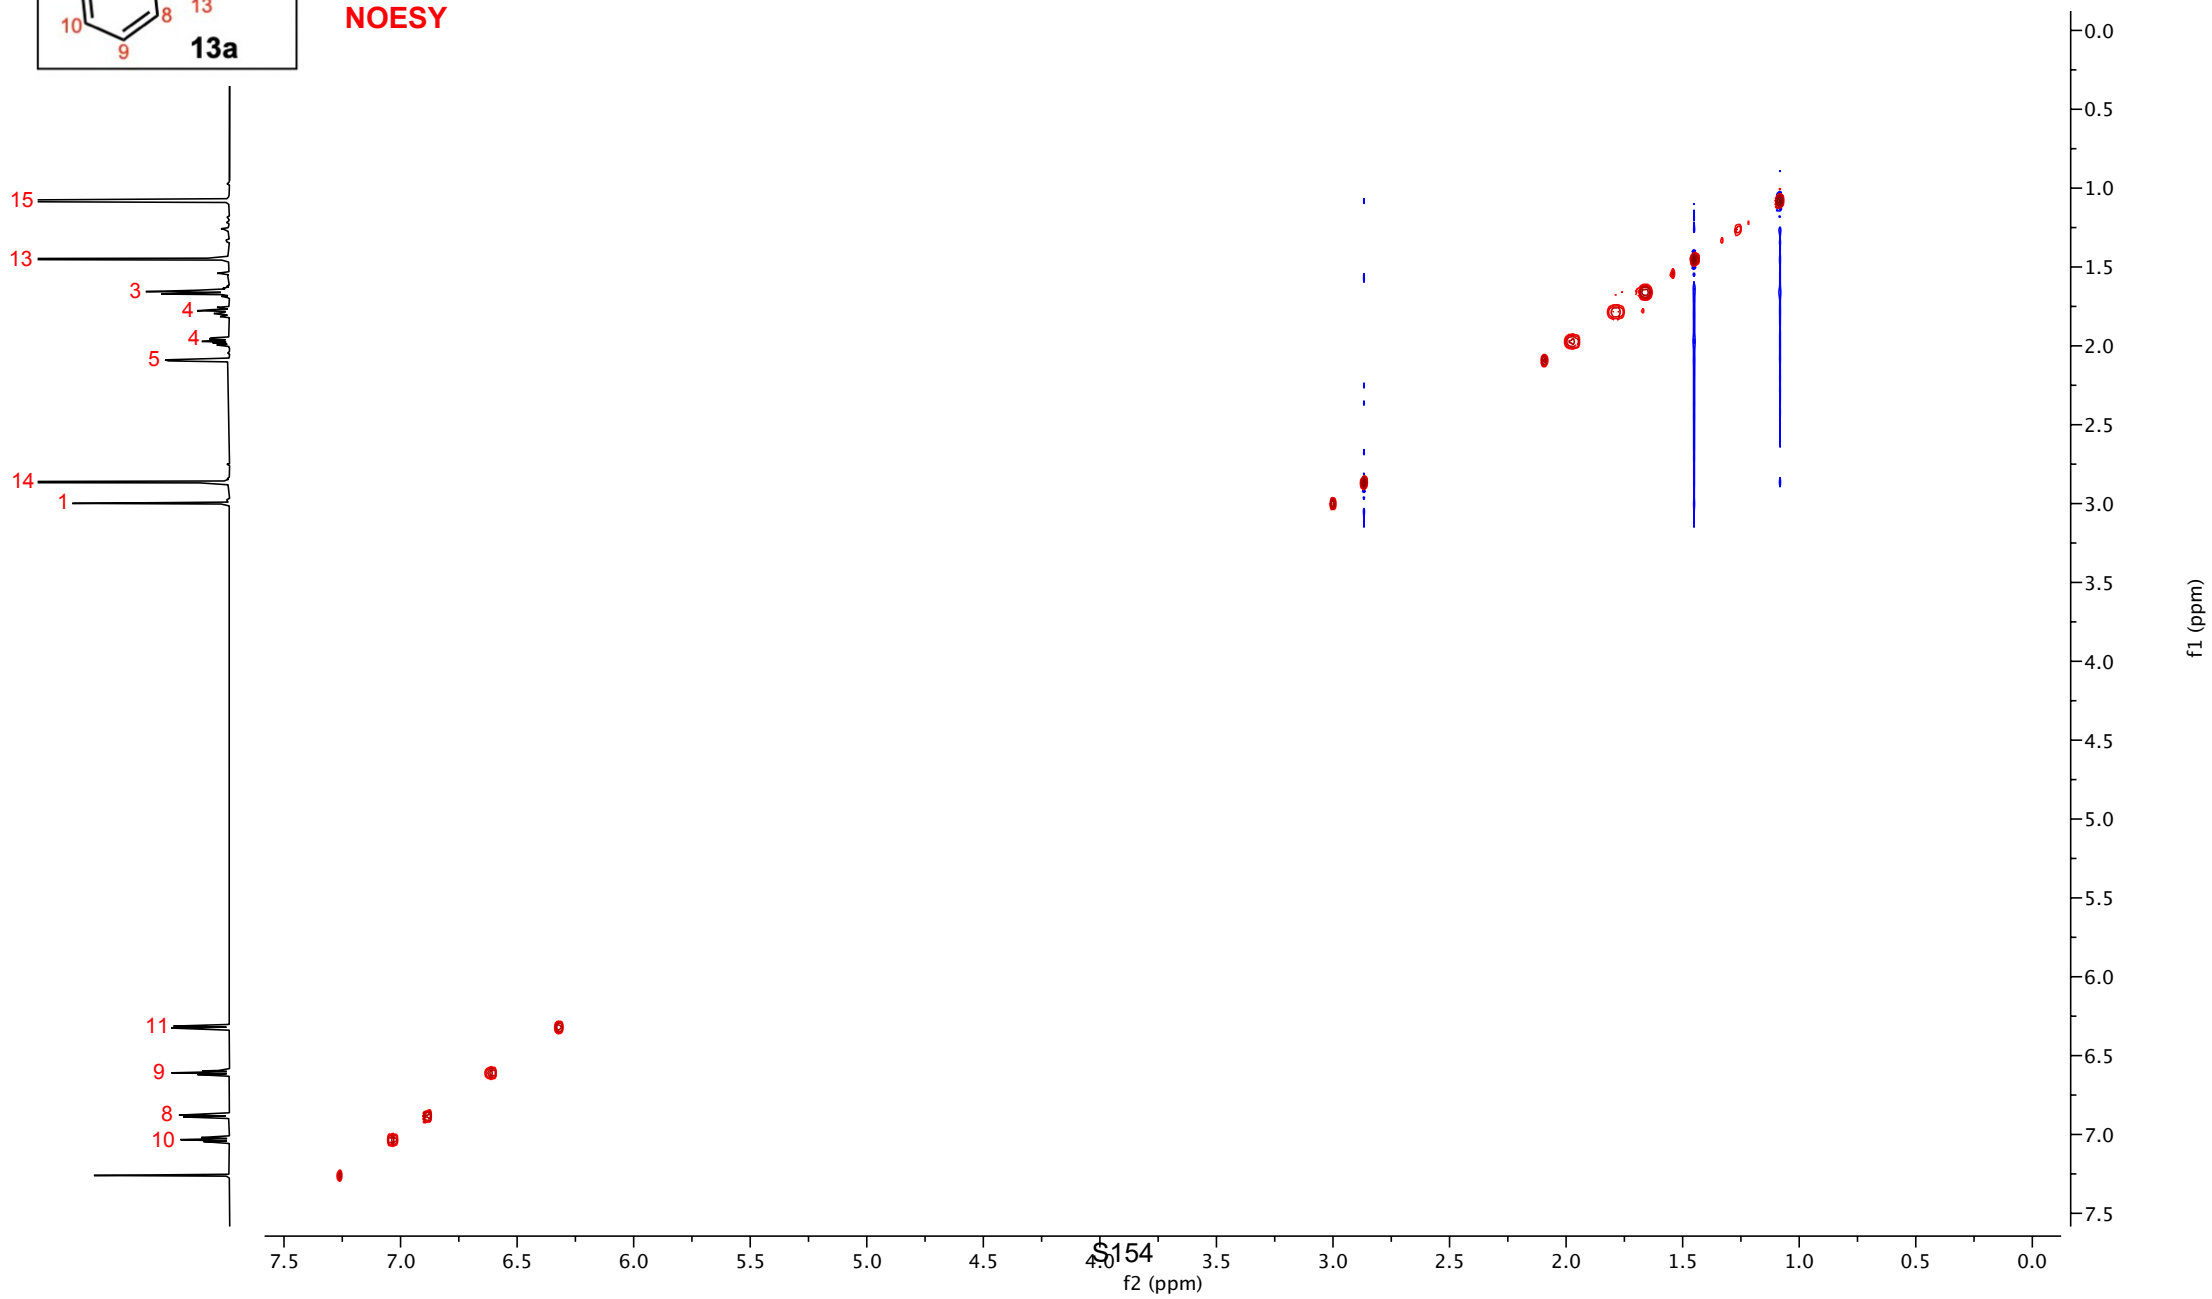

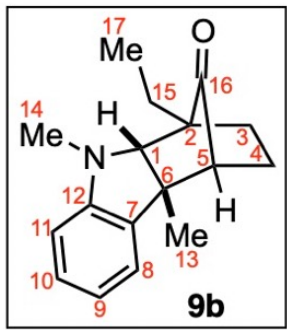

7.13  
7.13  
7.12  
7.11  
7.10  
7.10  
6.89  
6.88  
6.88  
6.65  
6.64  
6.64  
6.63  
6.62  
6.42  
6.41

3.35  
3.34

2.85  
1.97  
1.96  
1.86  
1.85  
1.84  
1.84  
1.83  
1.83  
1.82  
1.81  
1.81  
1.69  
1.68  
1.66  
1.65  
1.65  
1.64  
1.64  
1.63  
1.62  
1.62  
1.61  
1.60  
1.59  
1.59  
1.46  
1.45  
1.45  
1.44  
1.44  
1.43  
1.43  
1.42  
1.42  
1.41  
1.41  
1.40  
1.31  
1.31  
1.30  
1.29  
1.29  
1.28  
1.28  
1.27  
1.27  
1.04  
1.03  
1.02  
1.02

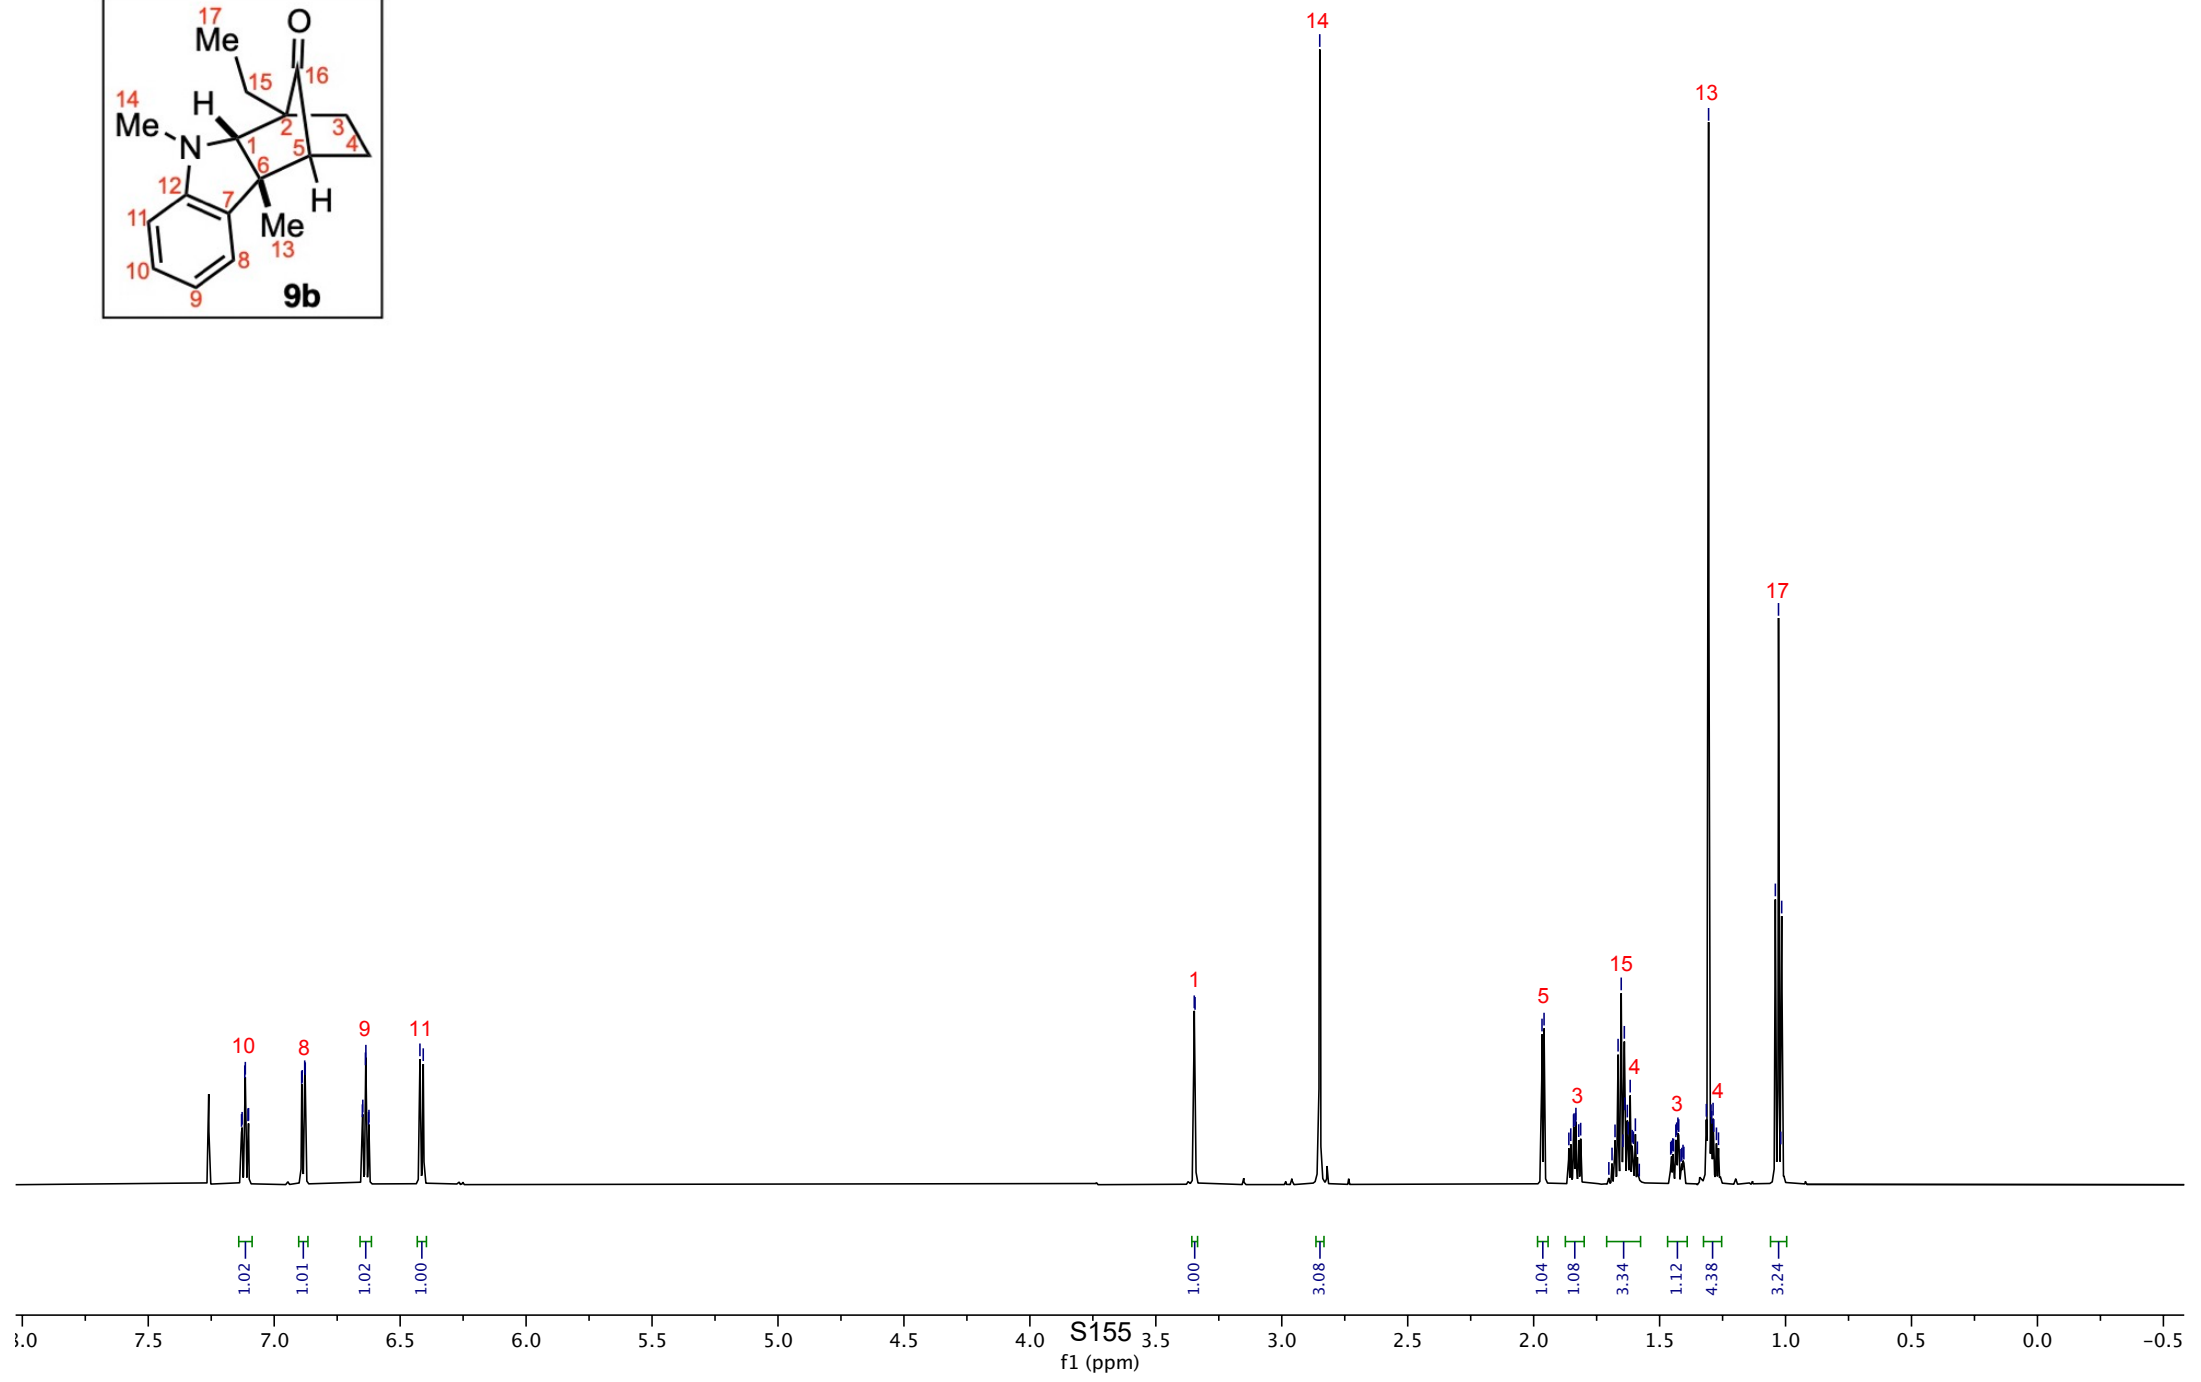

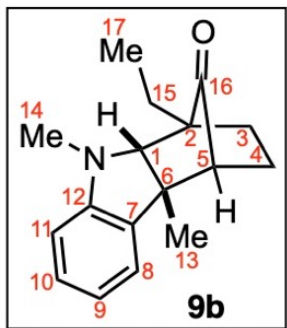

— 215.71

— 154.34

— 132.23

— 128.75

— 124.43

— 117.37

— 106.14

— 75.26

— 51.82

— 50.55

— 48.11

— 35.69

— 28.26

— 22.14

— 21.37

— 19.85

— 9.57

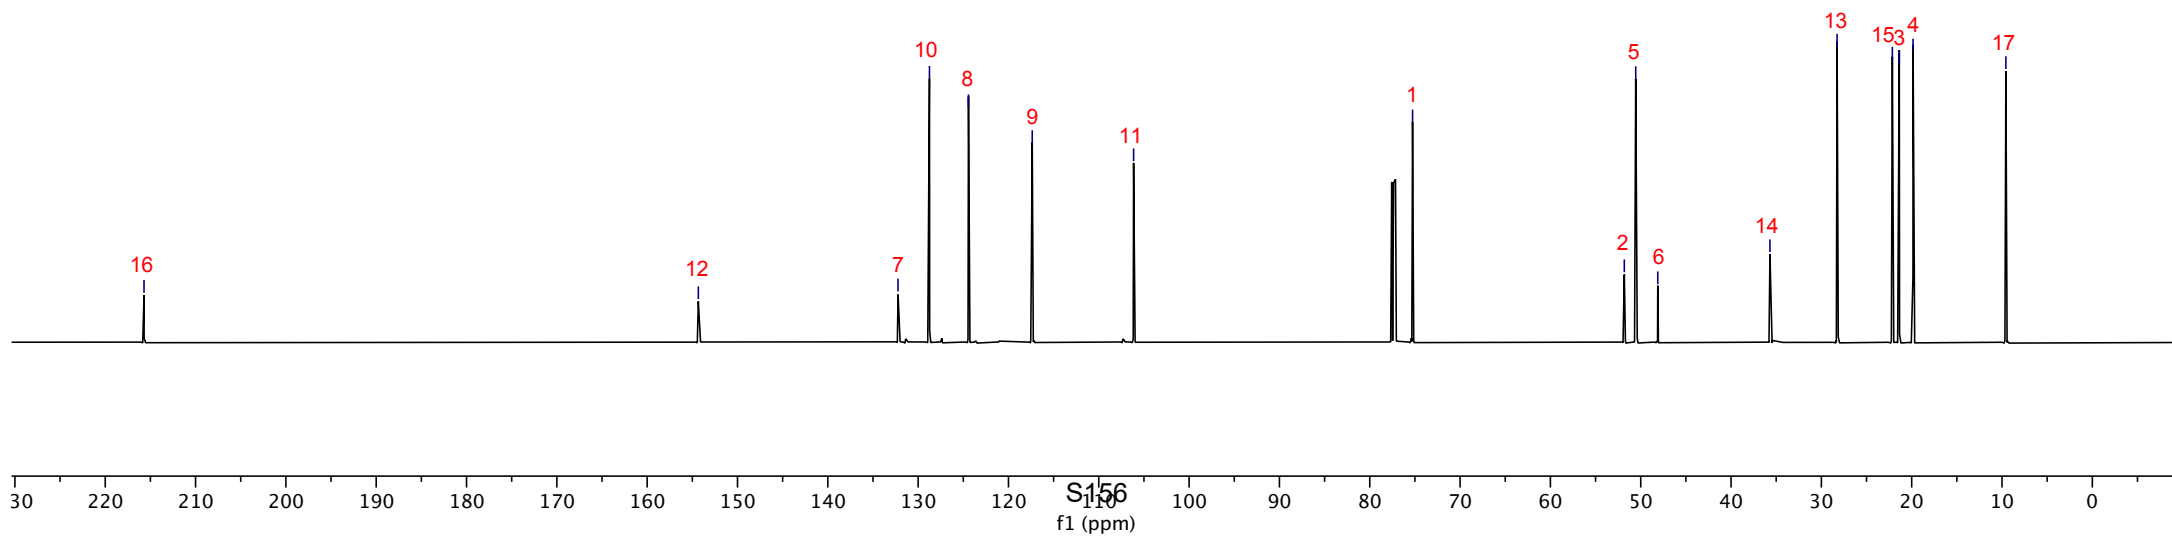

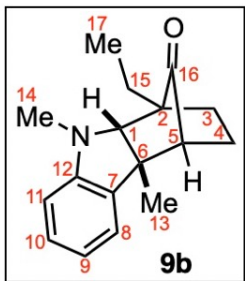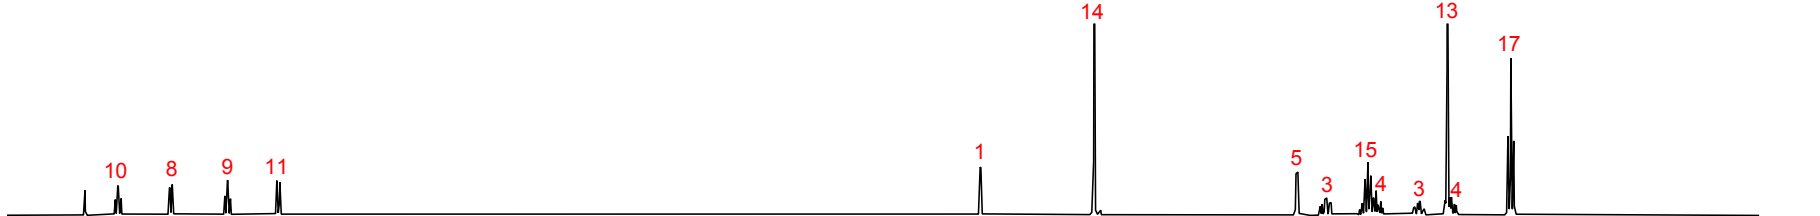

**COSY**

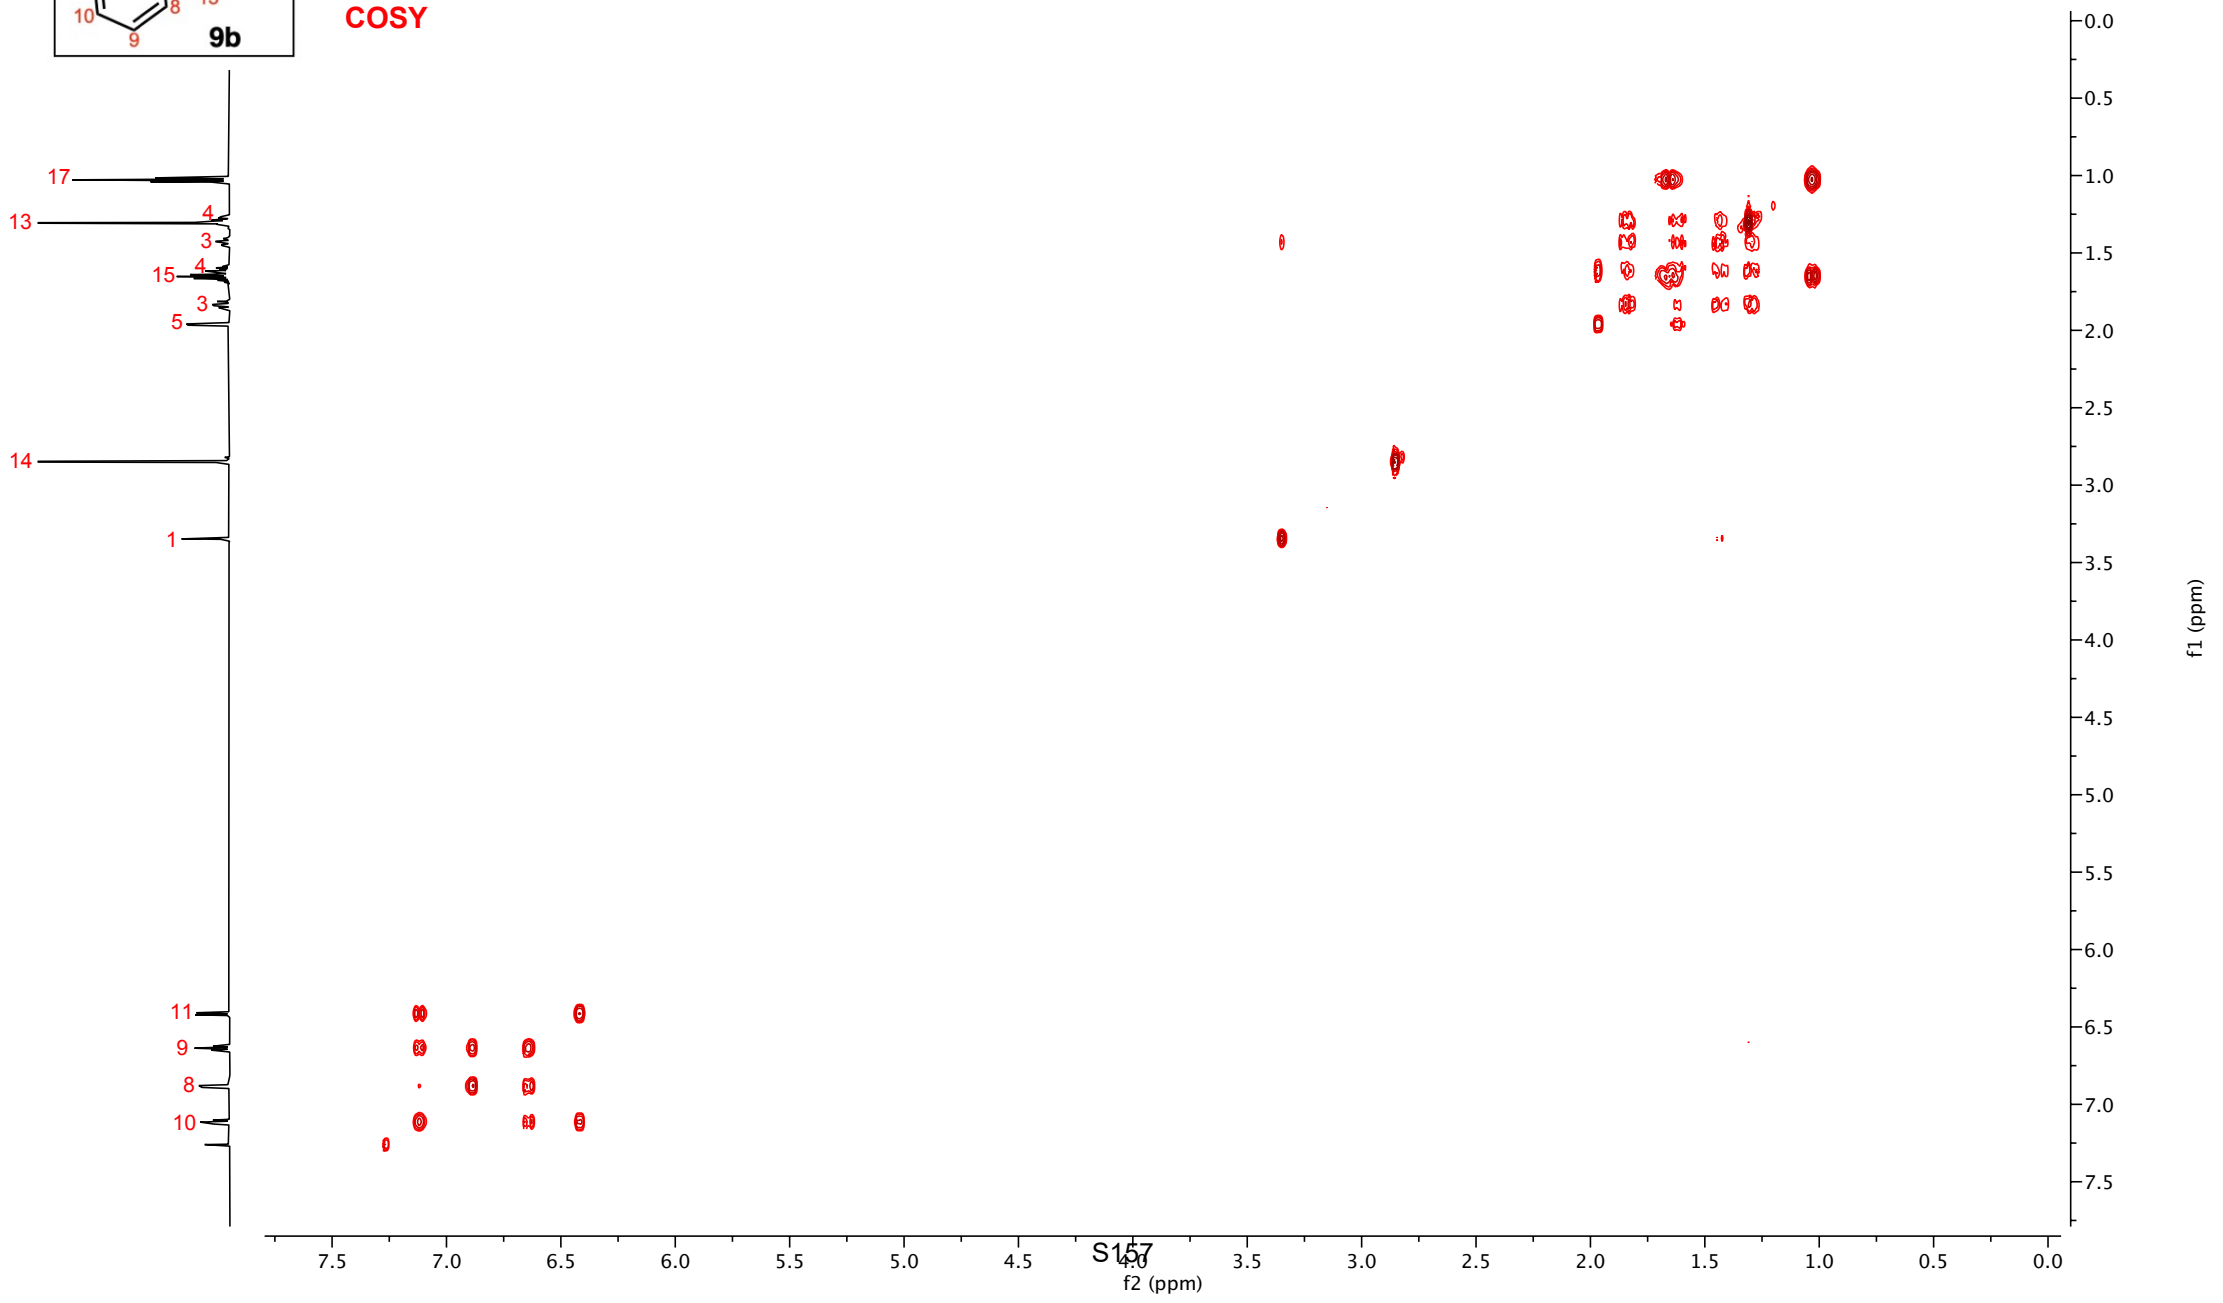

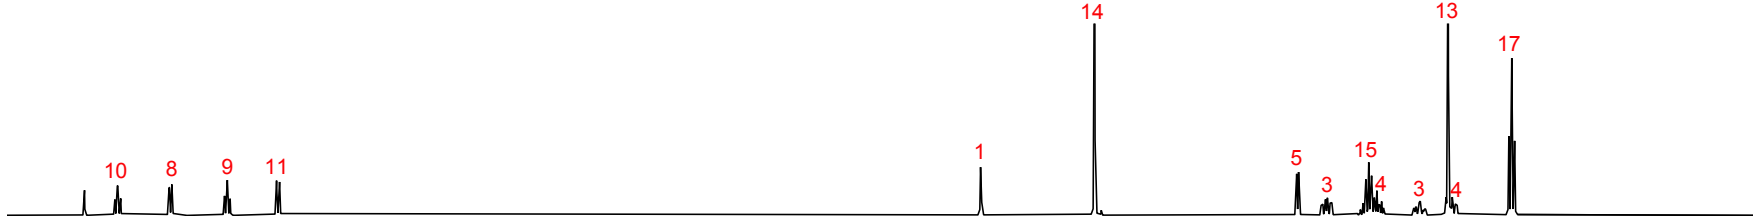

**HSQC**

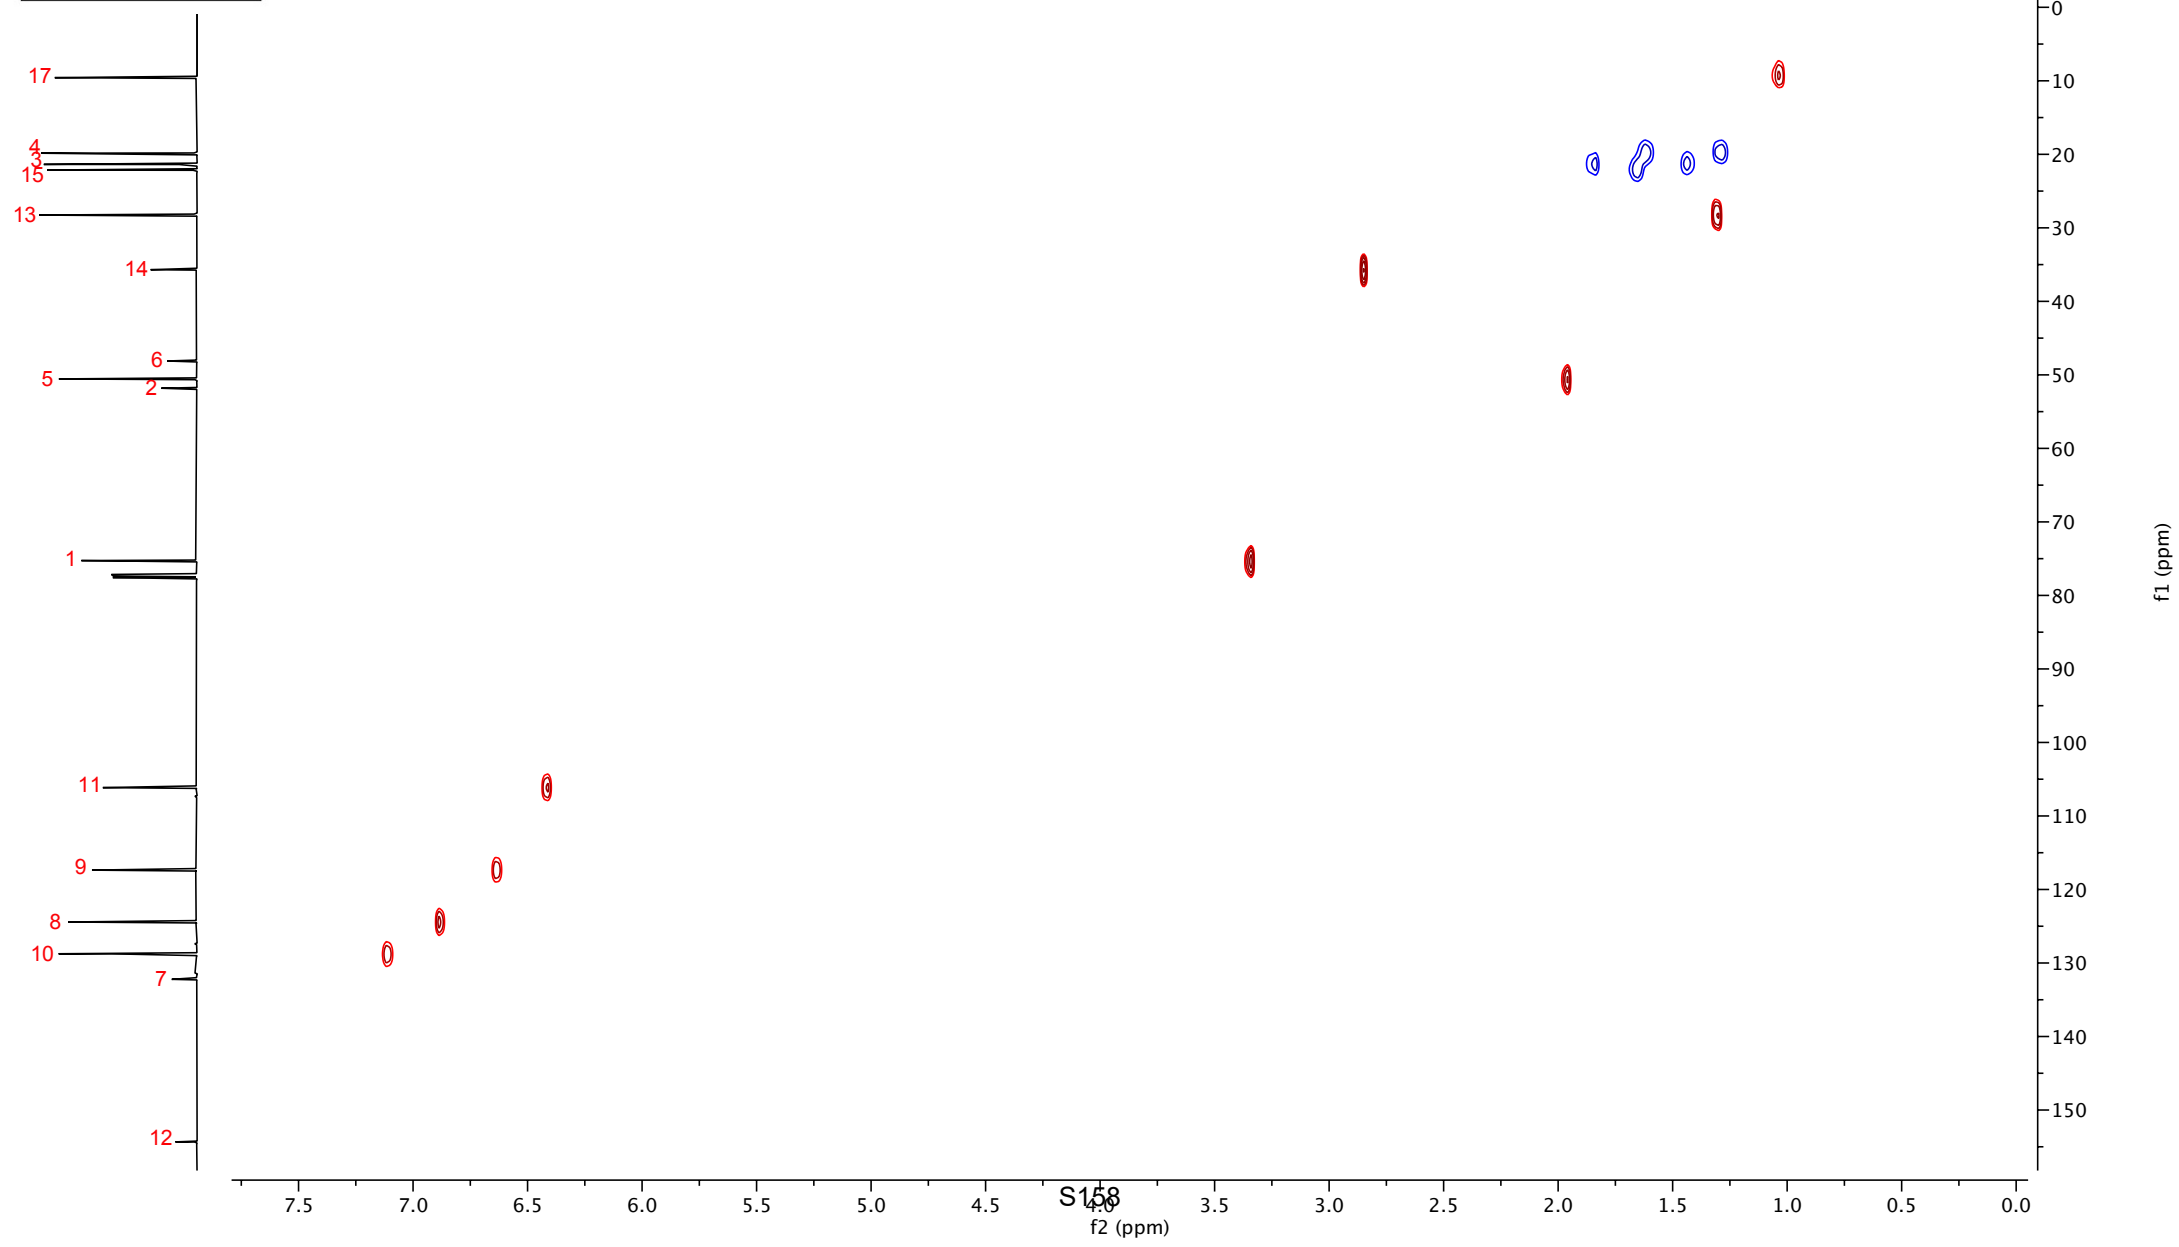

S158

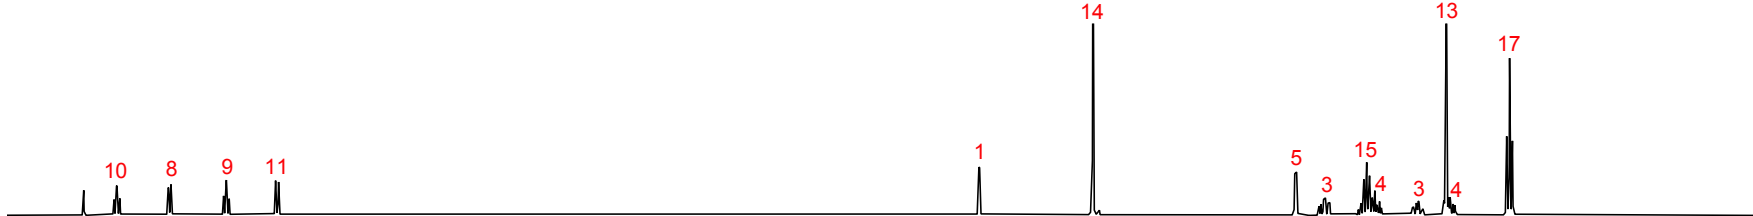

**HMBC**

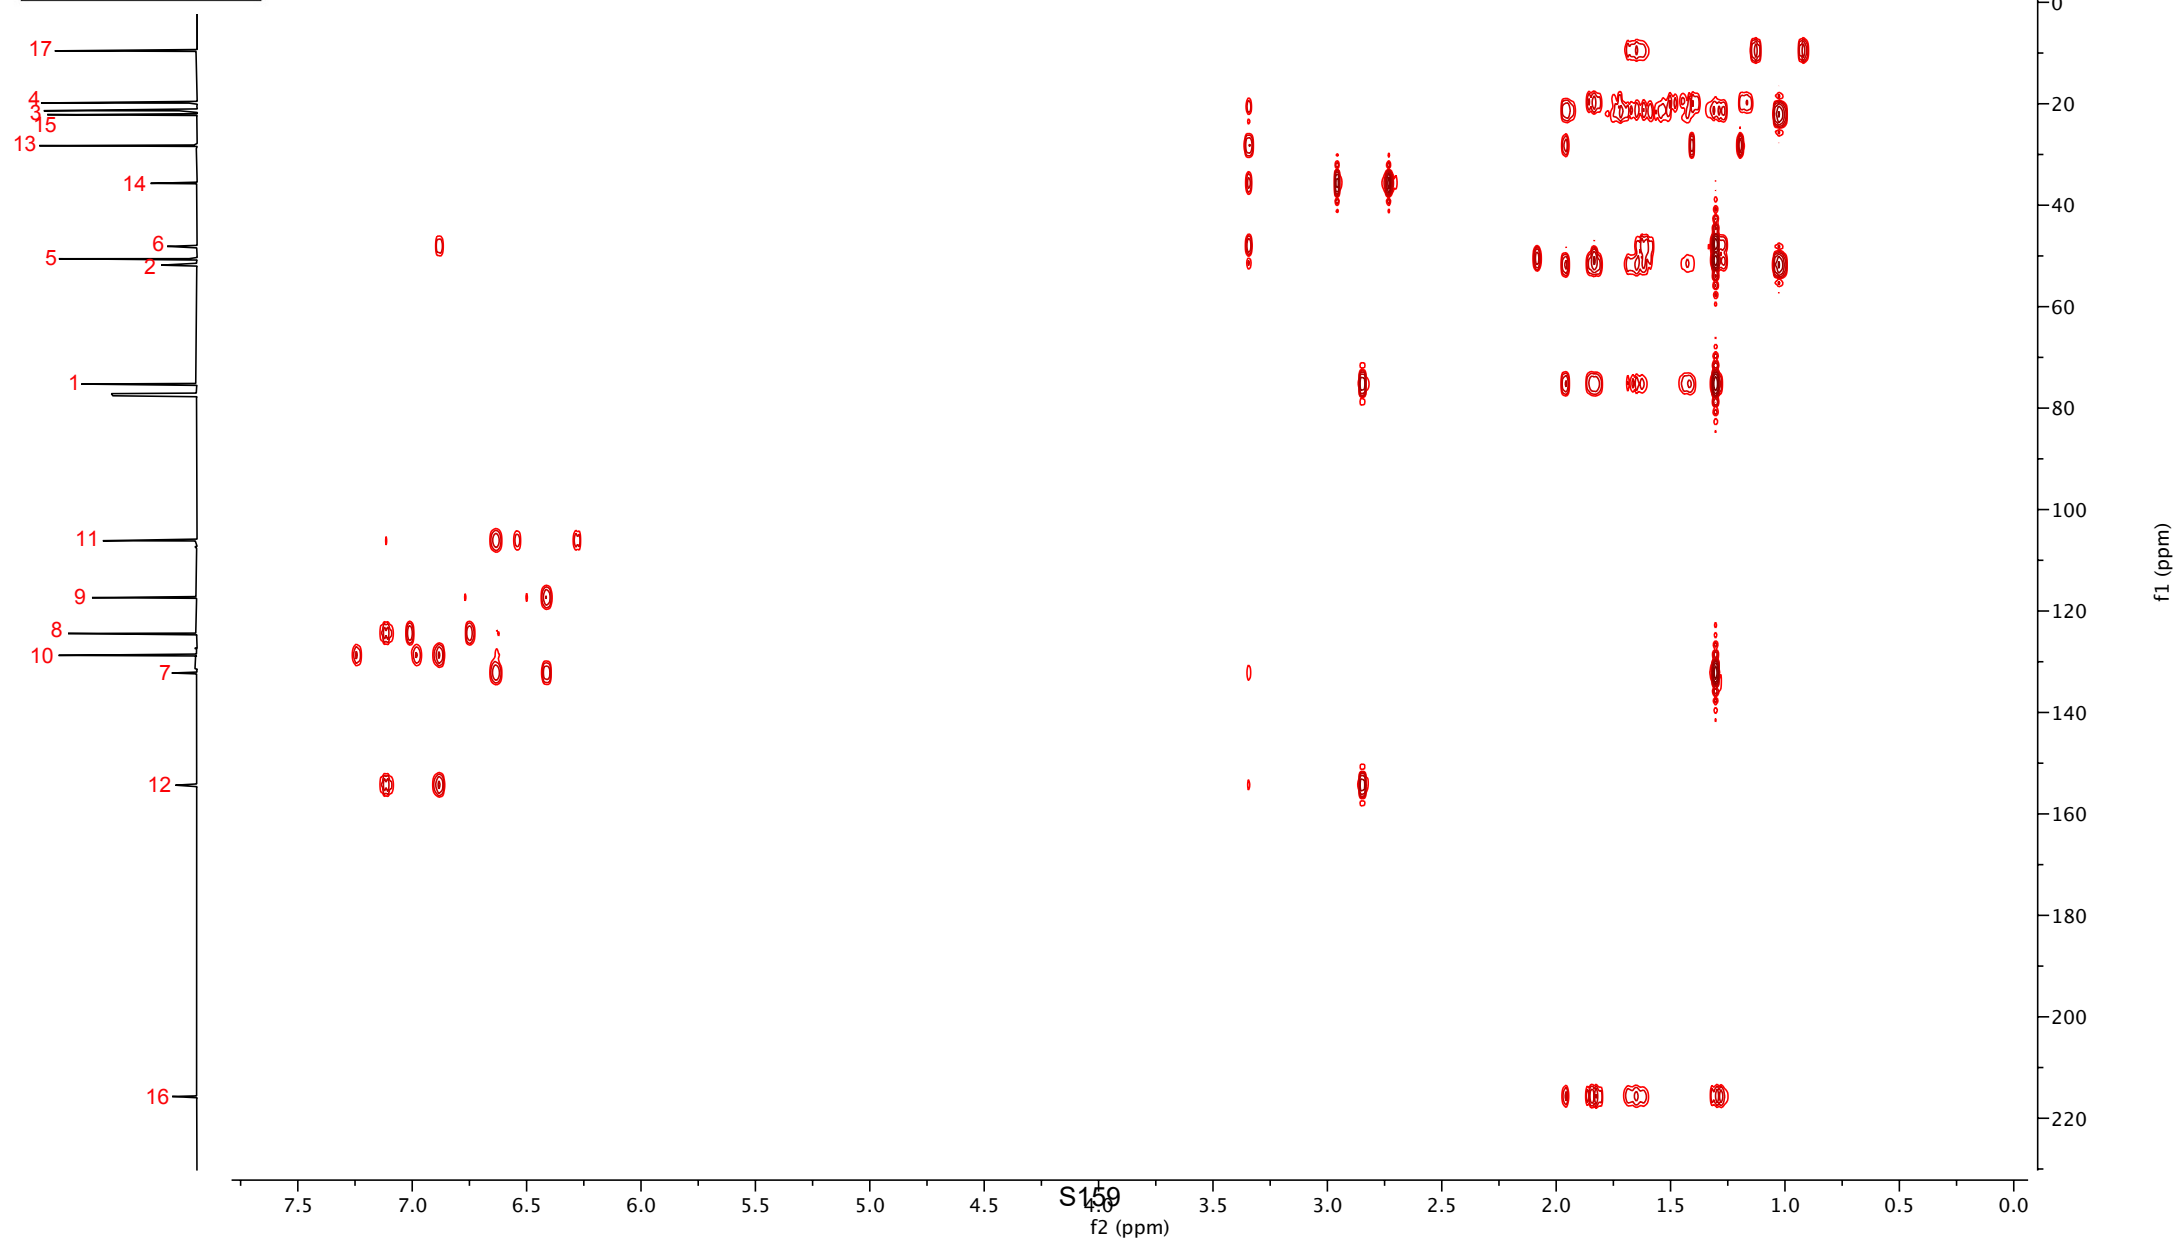



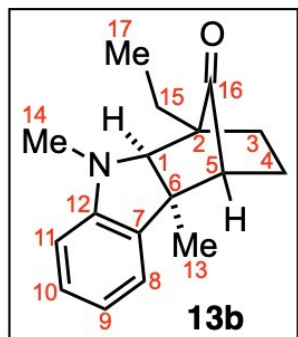

7.05  
7.04  
7.04  
7.02  
7.02  
6.90  
6.89  
6.88  
6.64  
6.63  
6.62  
6.62  
6.61  
6.36  
6.34

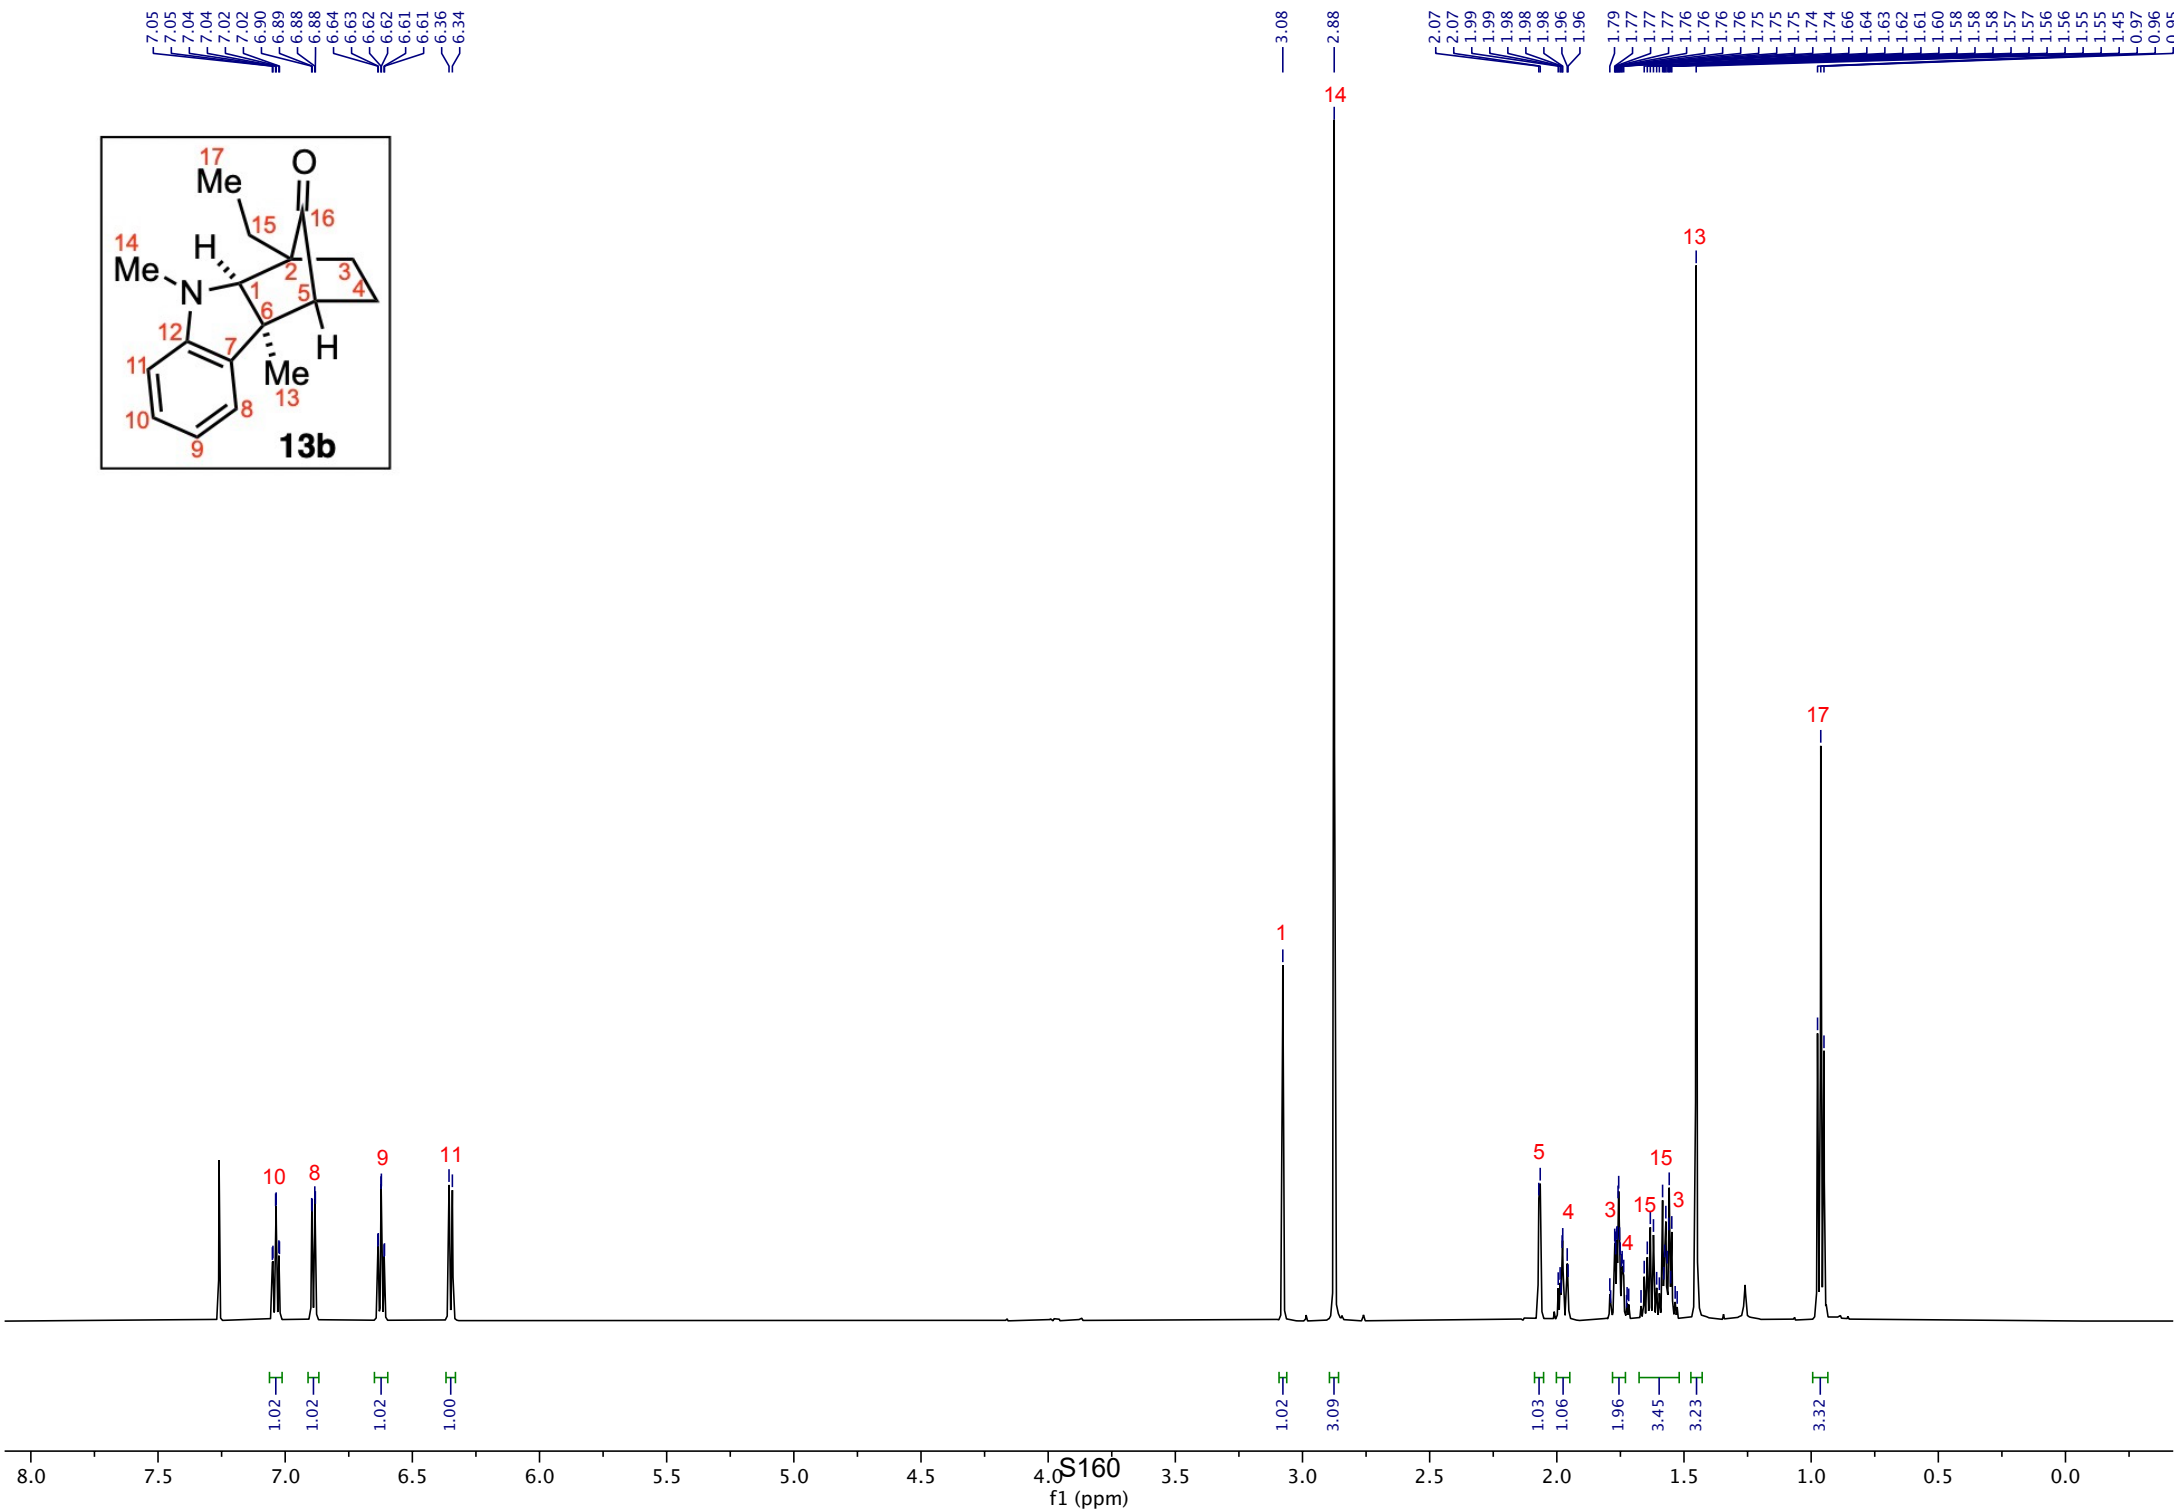

2.07  
2.07  
1.99  
1.99  
1.98  
1.98  
1.96  
1.96  
1.79  
1.77  
1.77  
1.77  
1.76  
1.76  
1.76  
1.75  
1.75  
1.75  
1.74  
1.74  
1.66  
1.64  
1.63  
1.62  
1.61  
1.60  
1.58  
1.58  
1.57  
1.57  
1.56  
1.56  
1.55  
1.55  
1.45  
1.45  
1.36  
1.36

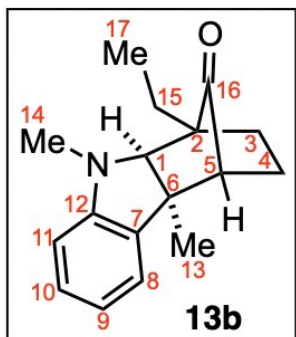

— 215.45

— 152.13

— 135.20

— 128.78

— 123.47

— 118.20

— 107.57

— 78.93

— 53.14

— 50.45

— 47.82

— 37.86

— 25.34

— 24.47

— 18.62

— 18.55

— 9.32

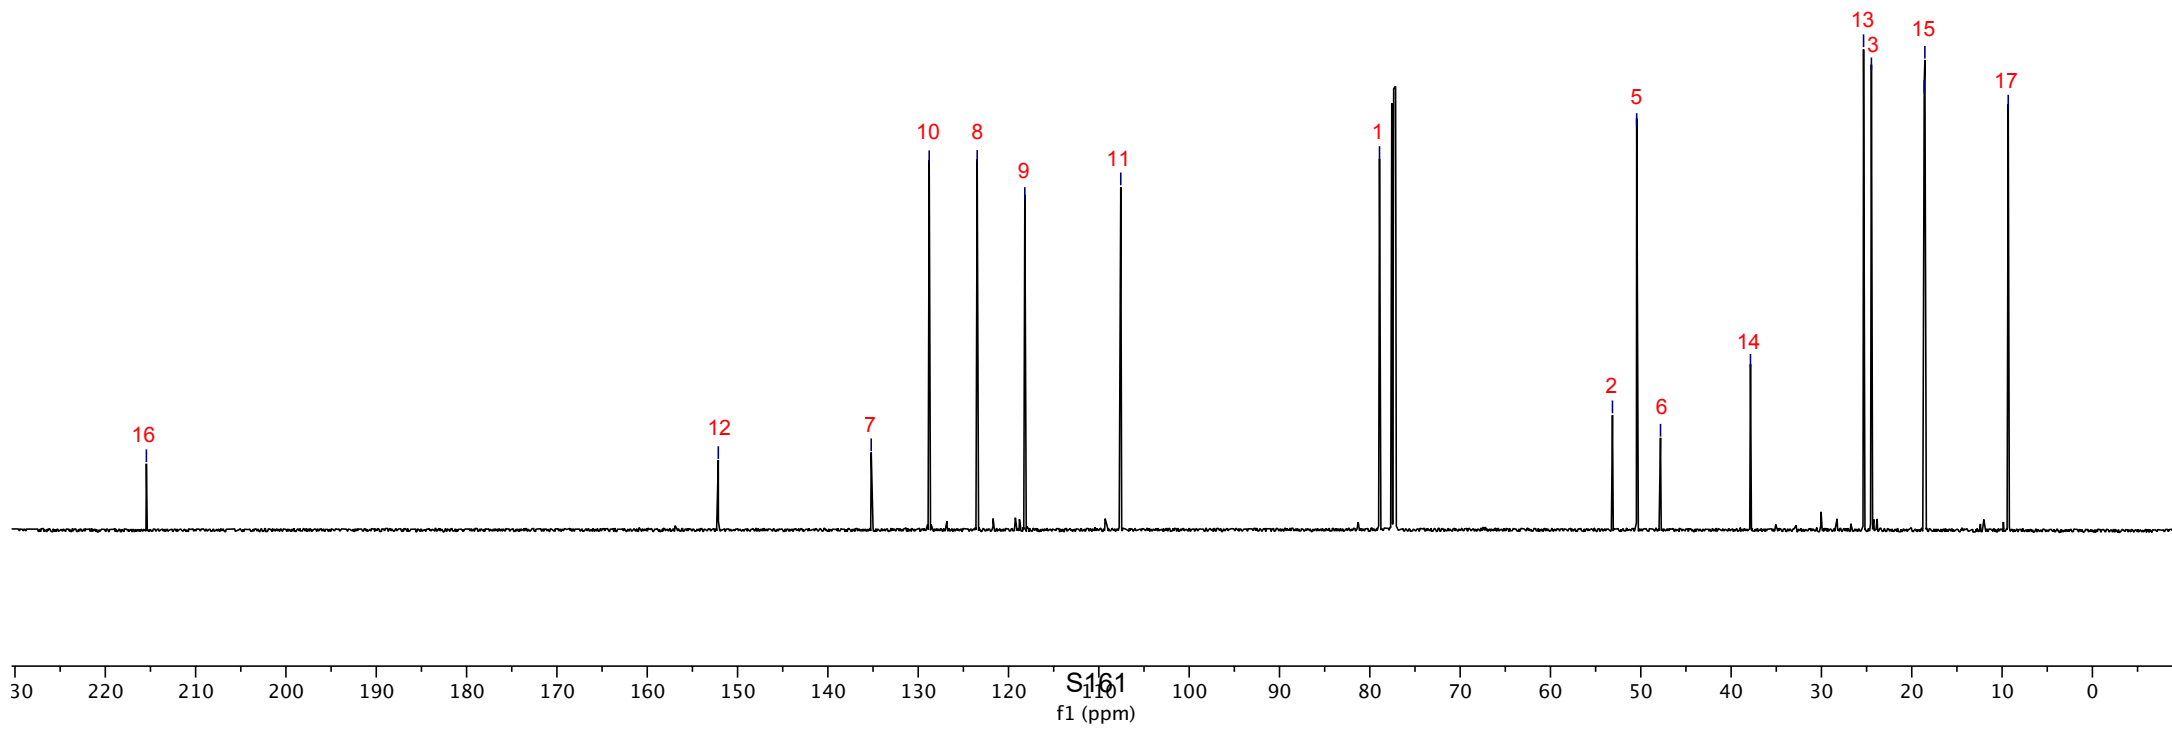

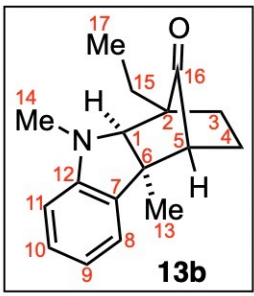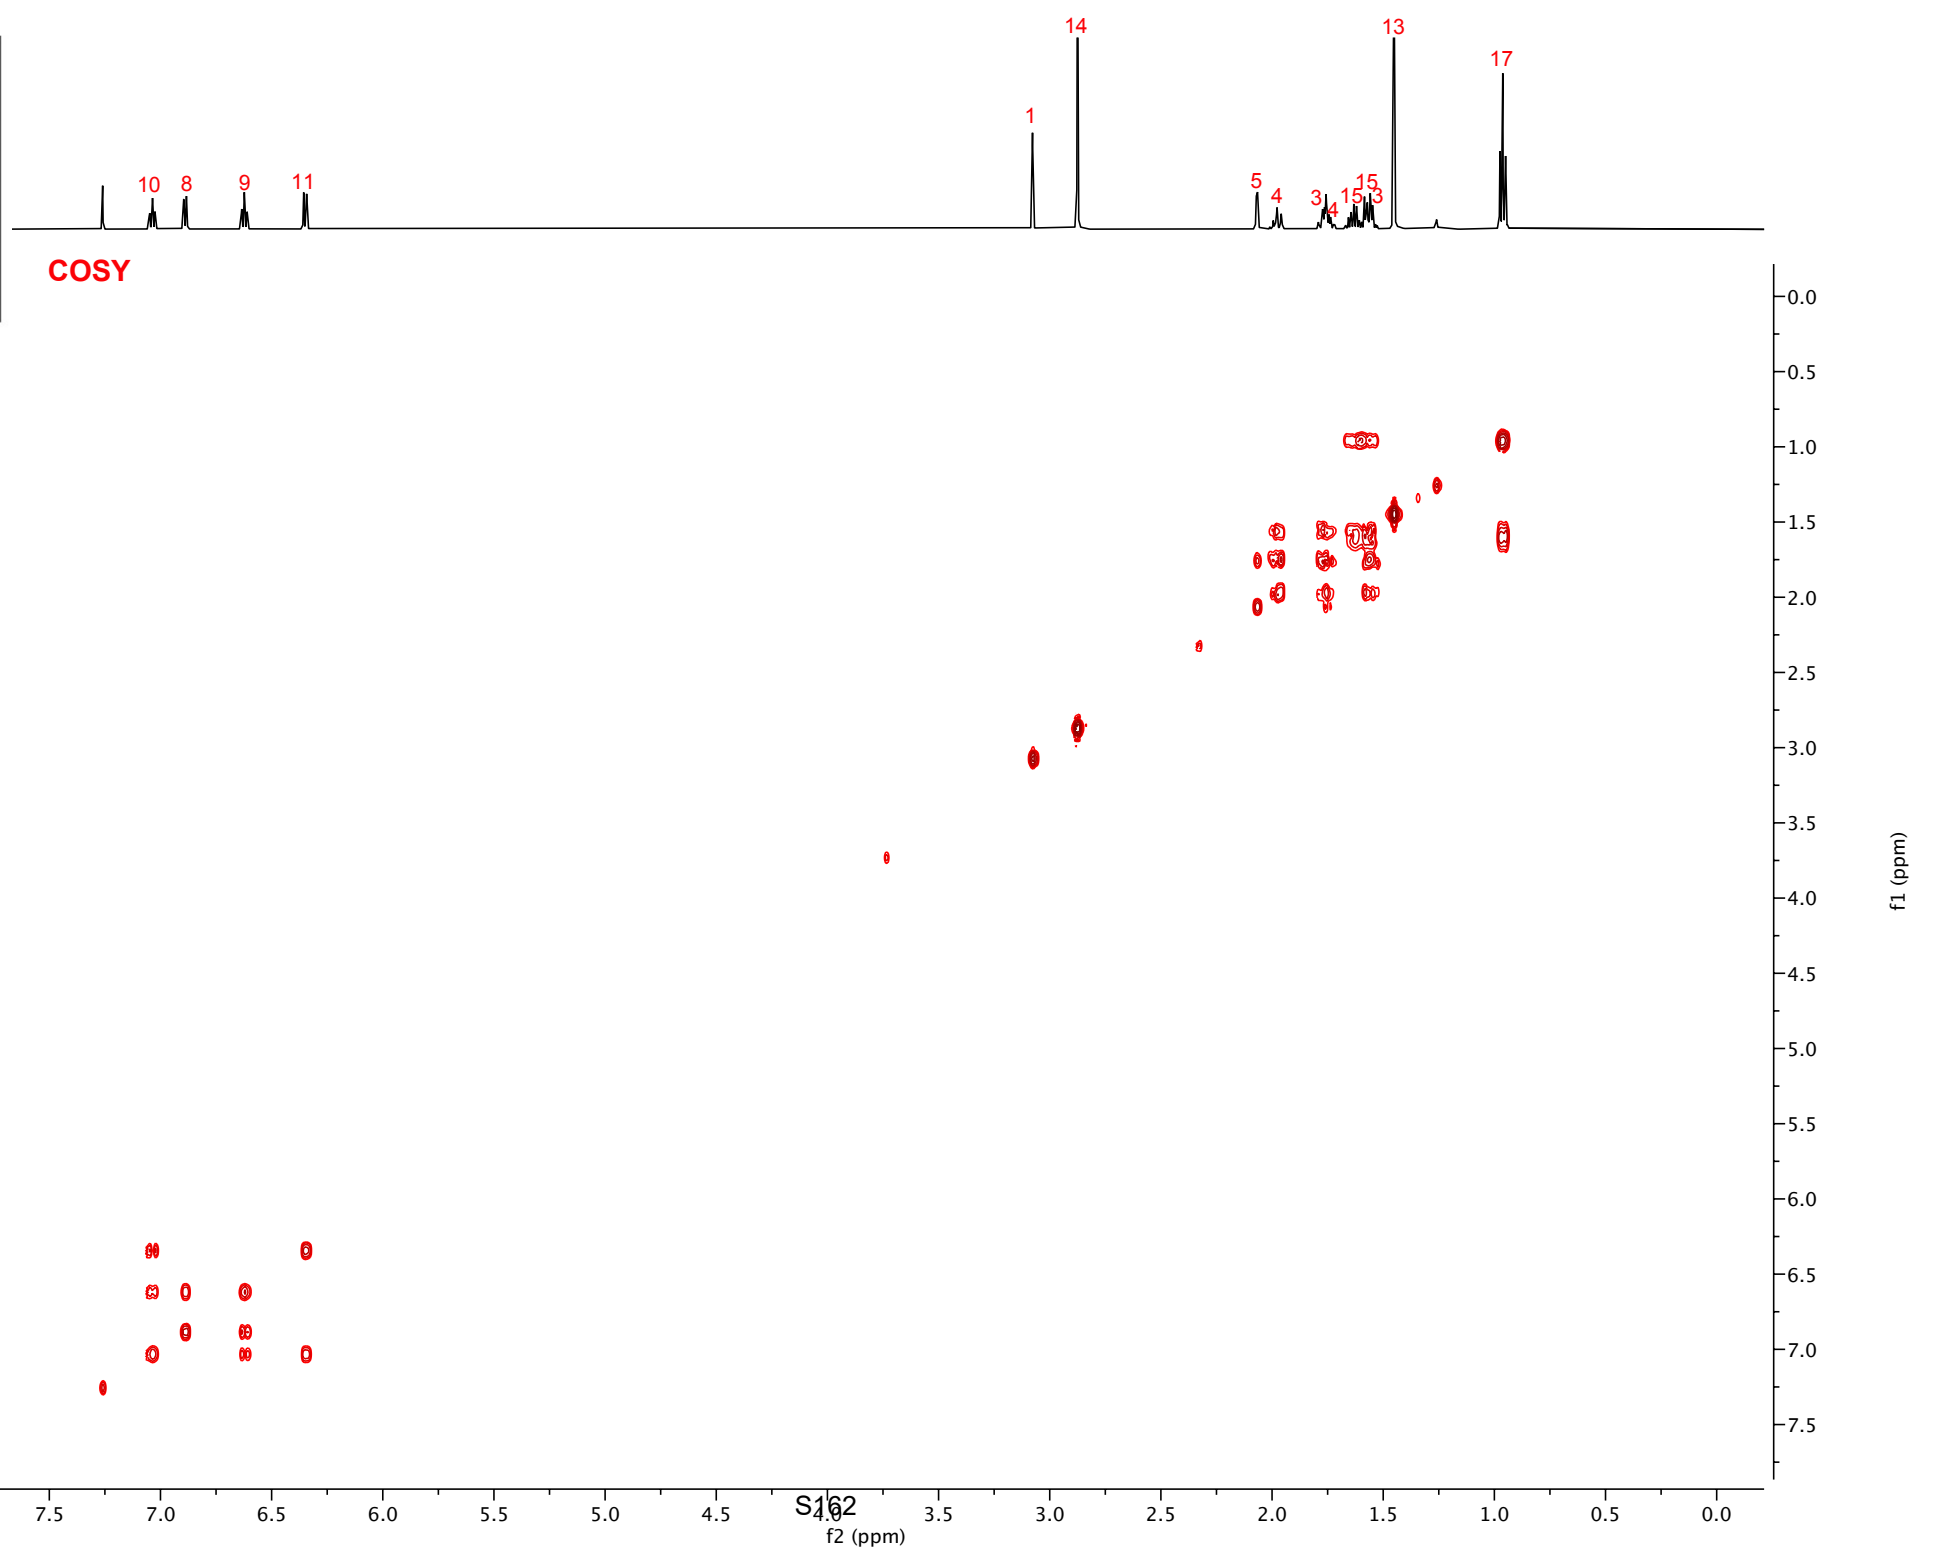

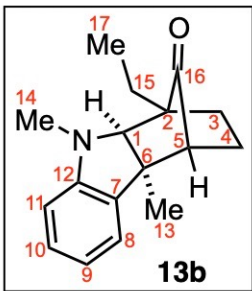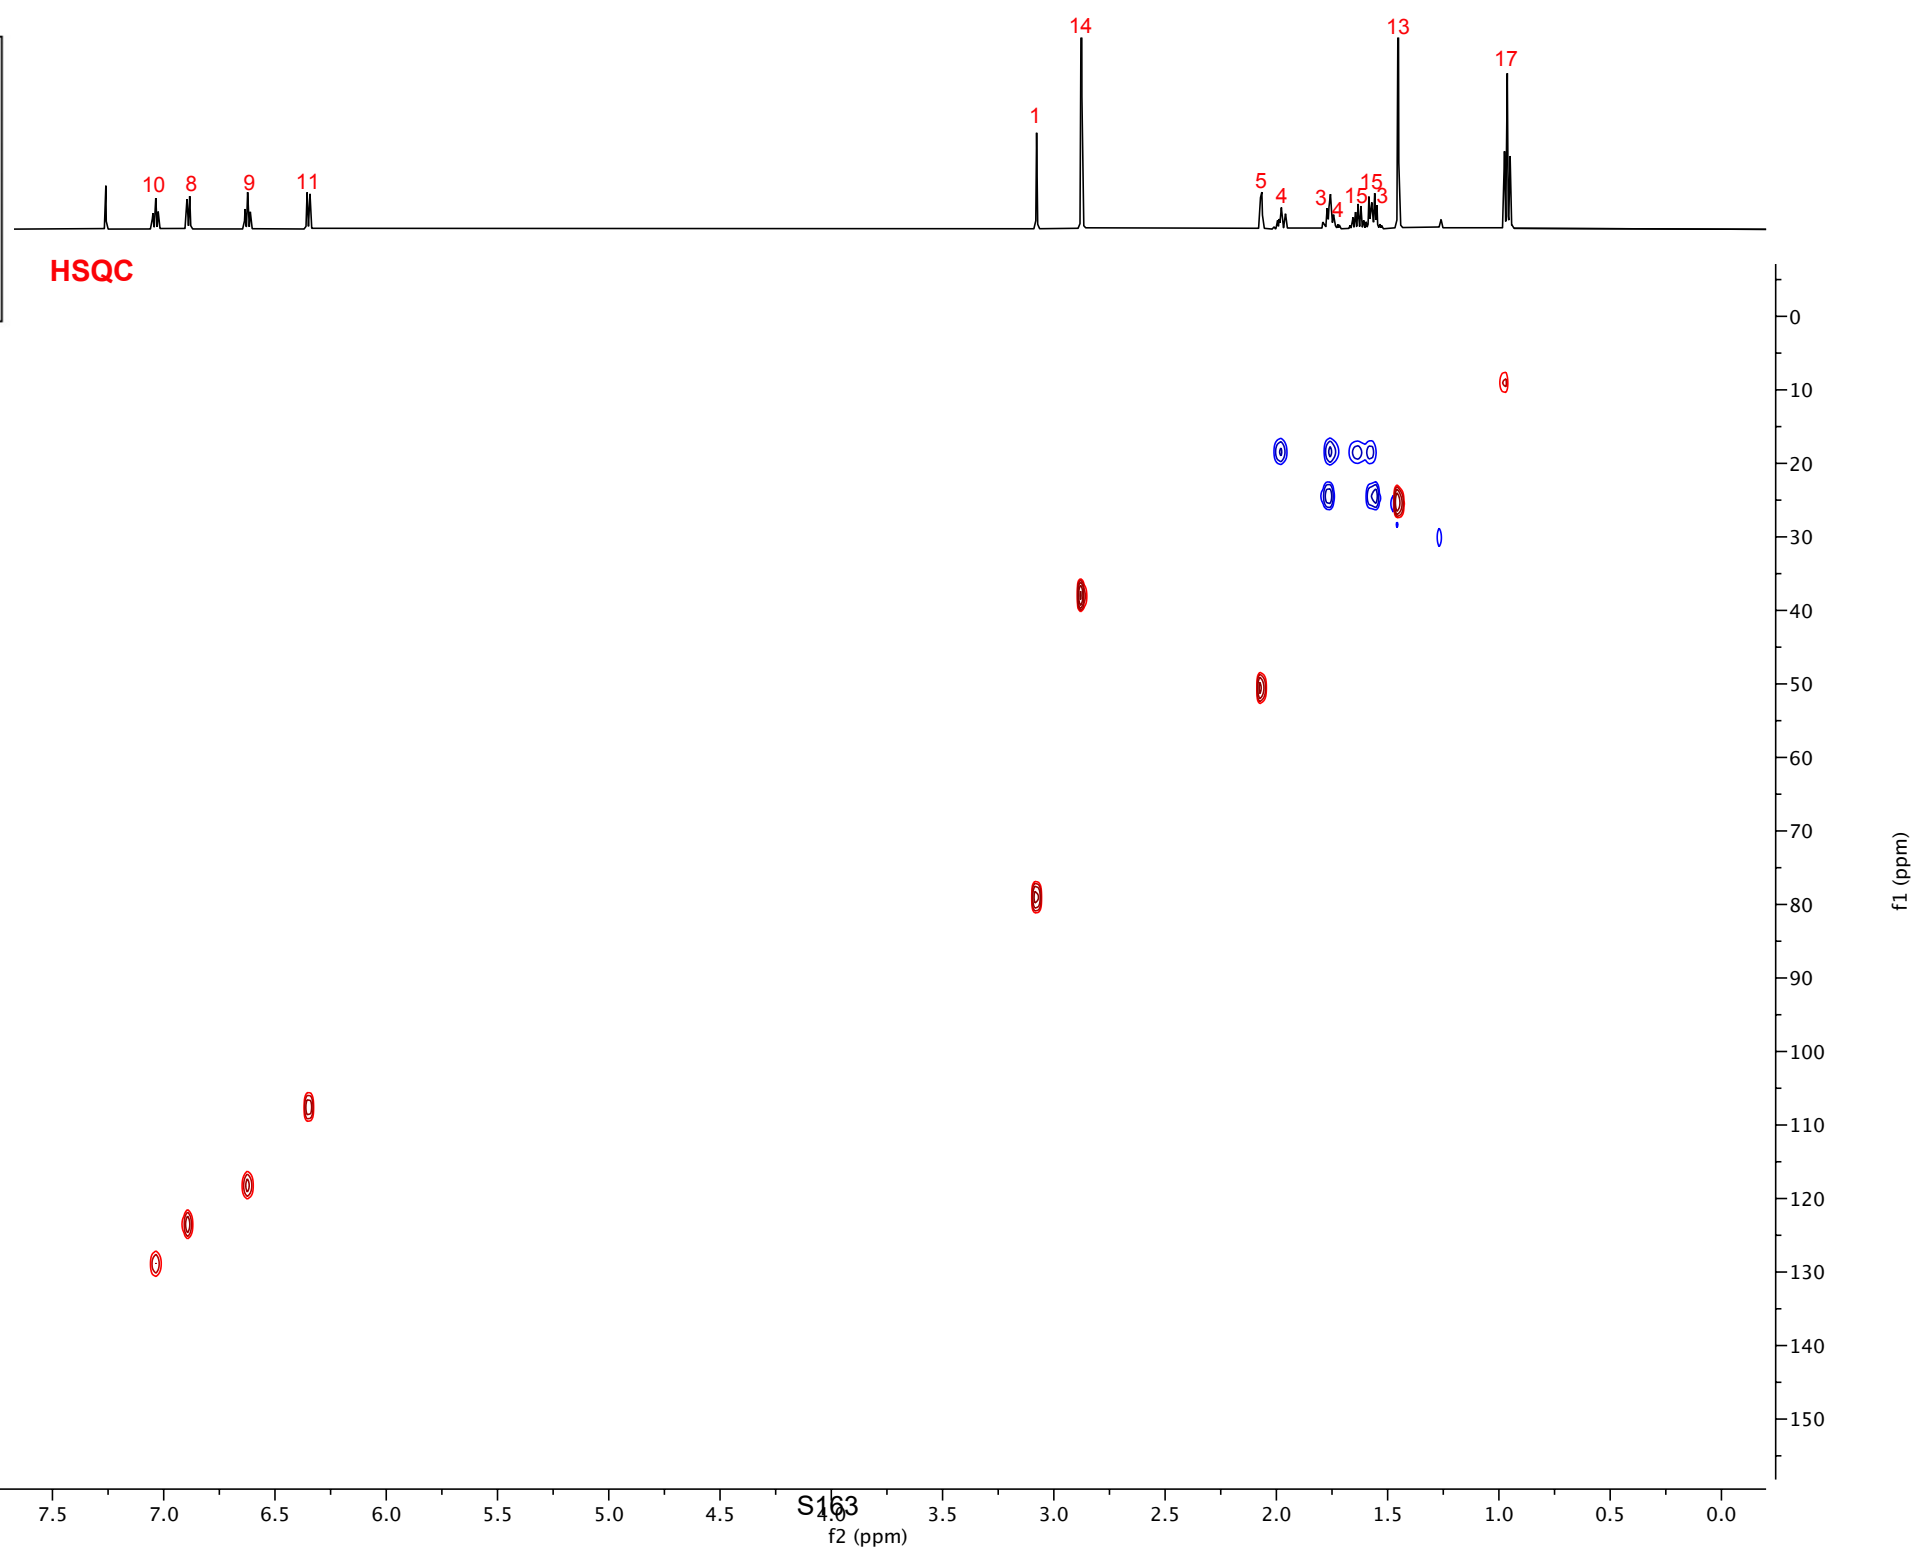

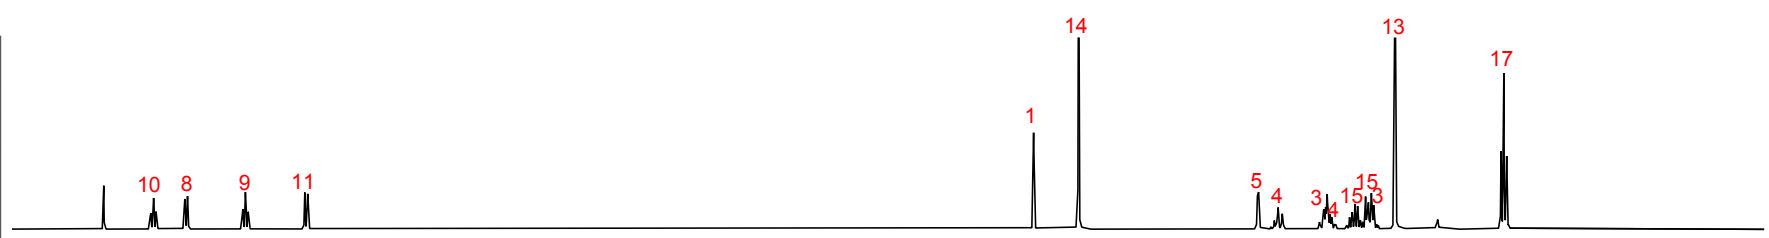

**HMBC**

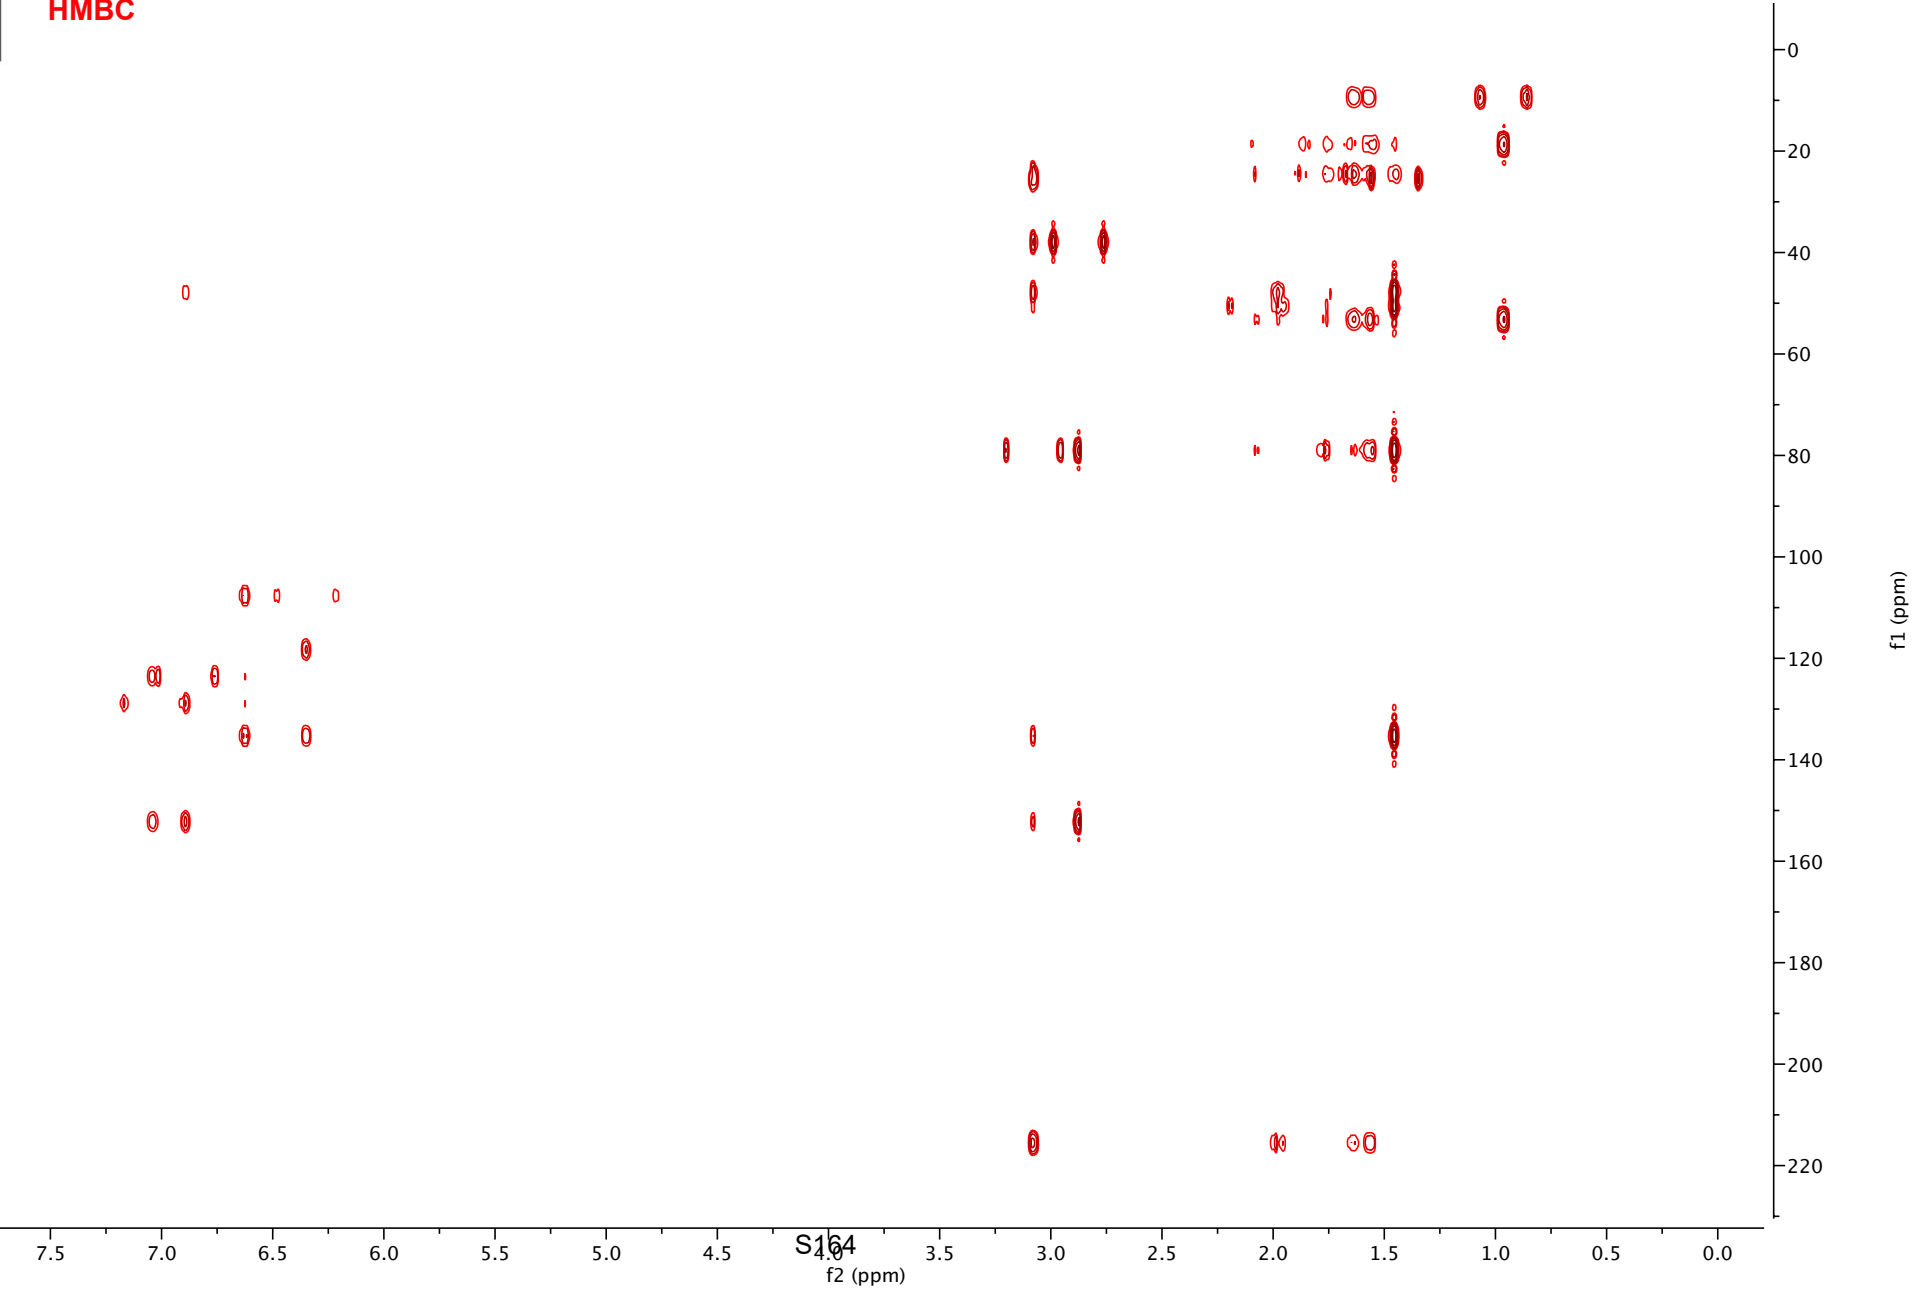

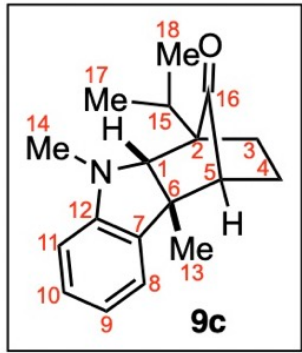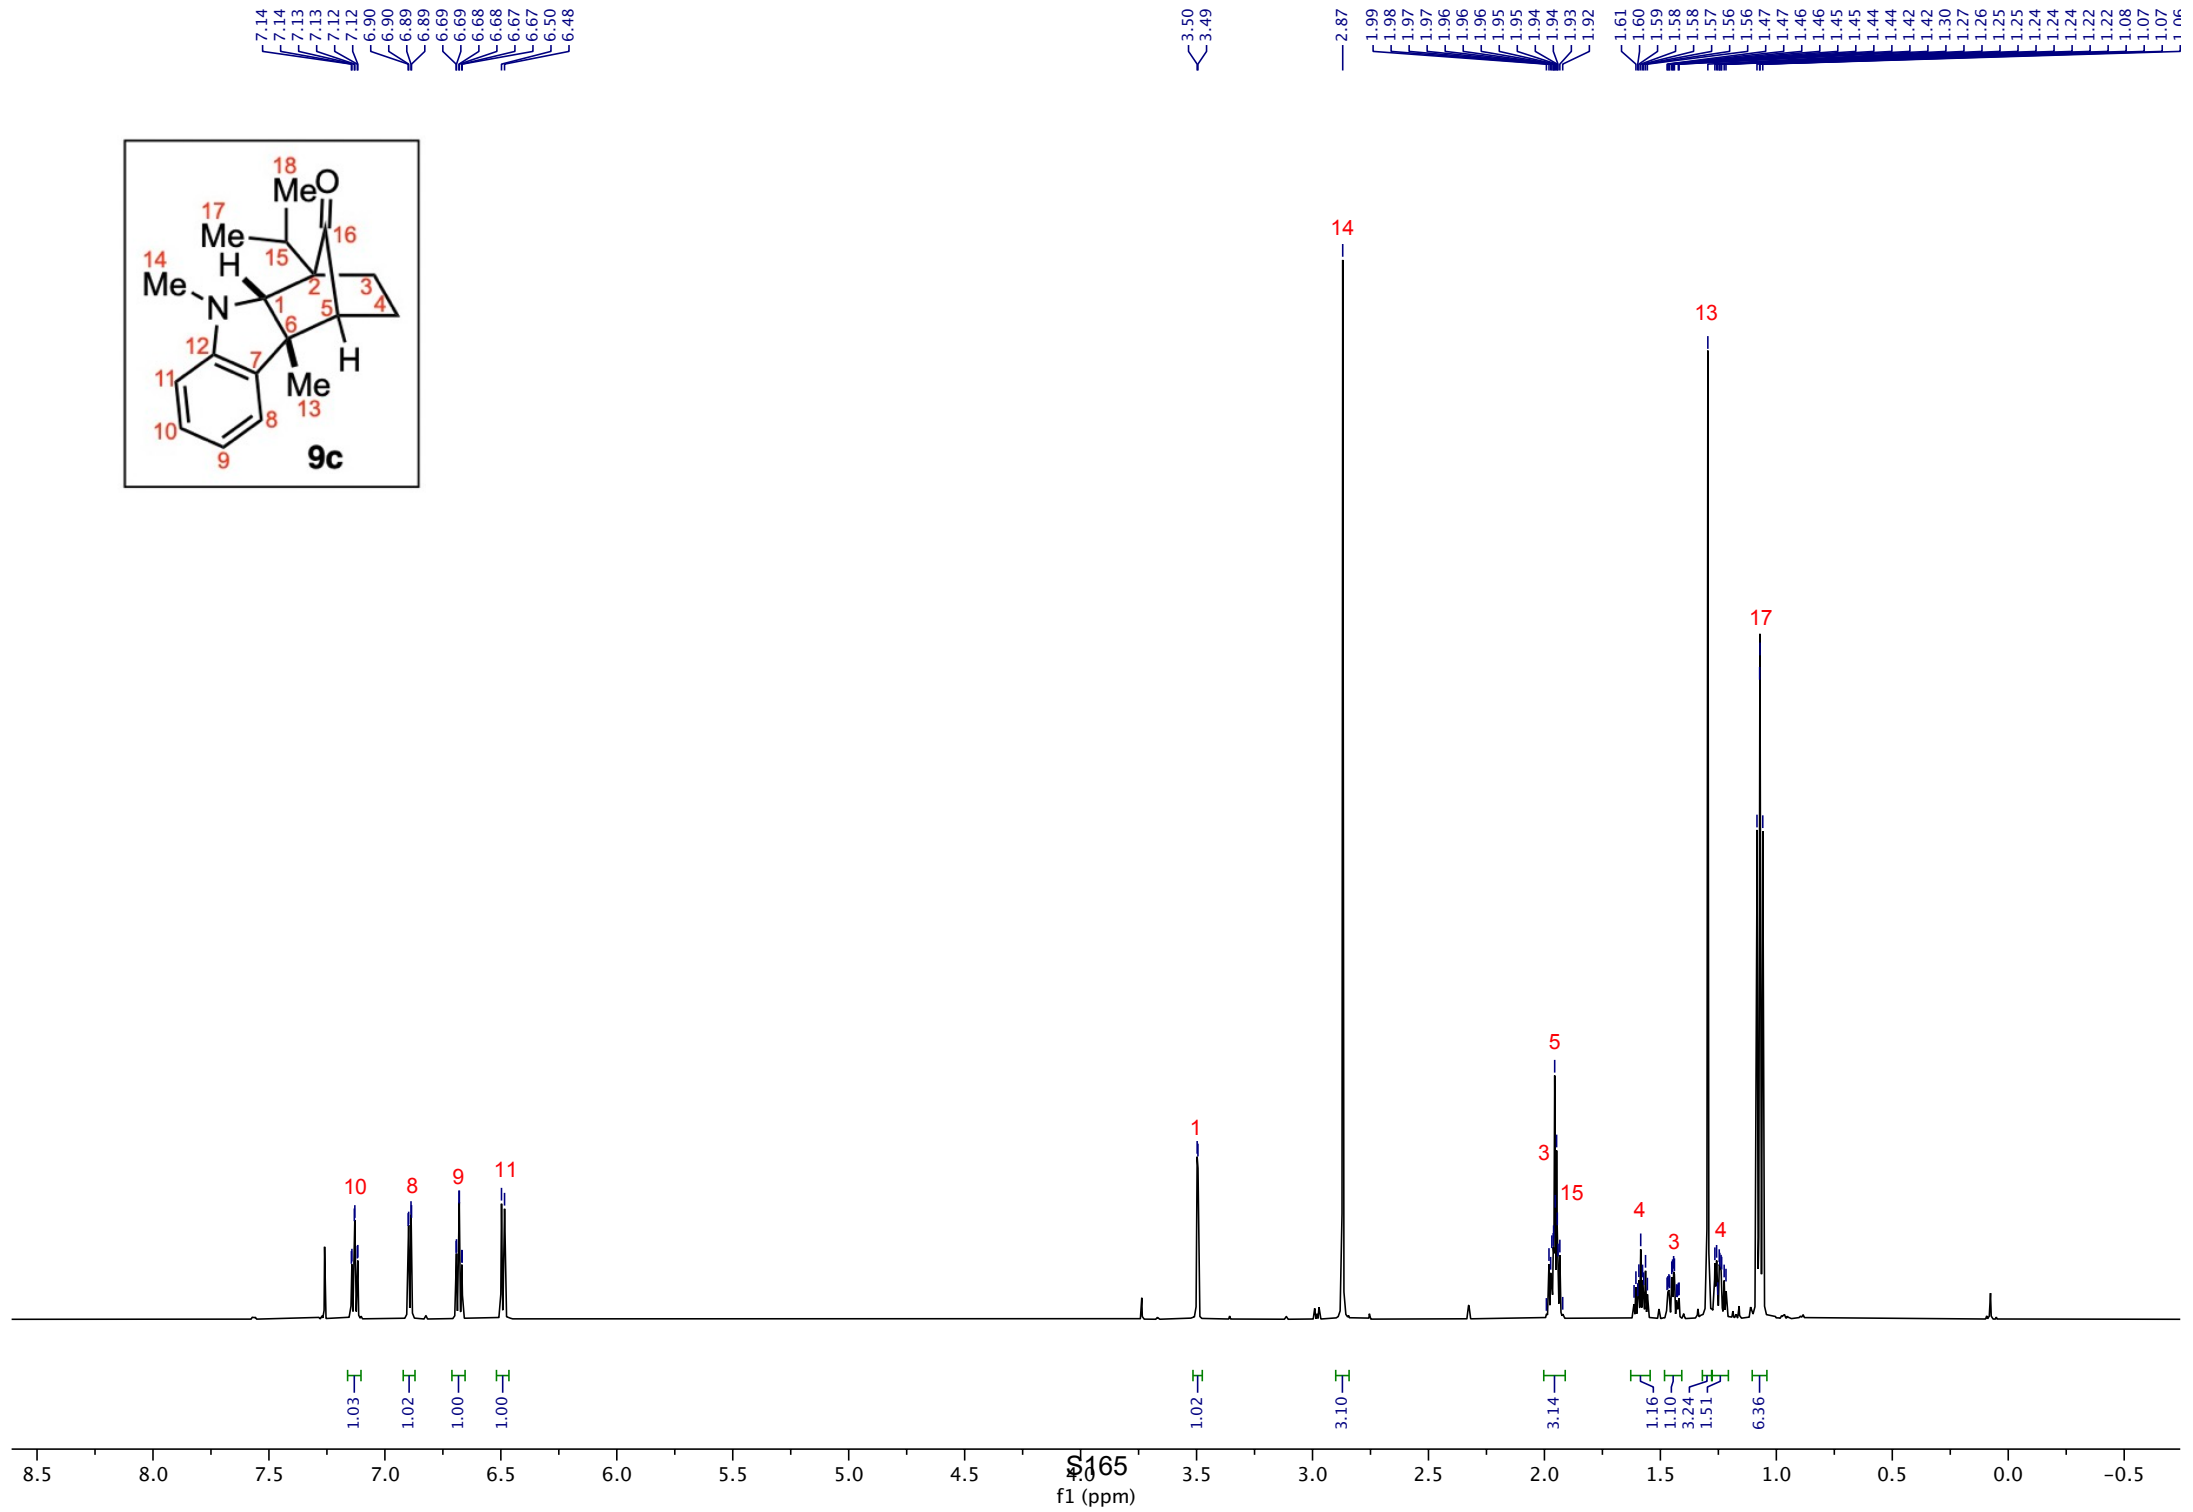



- 215.56
- 155.19
- 132.61
- 128.70
- 124.33
- 118.05
- 107.67
- 73.66
- 55.02
- 50.57
- 48.43
- 37.72
- 28.32
- 27.28
- 21.38
- 19.72
- 19.20
- 19.09

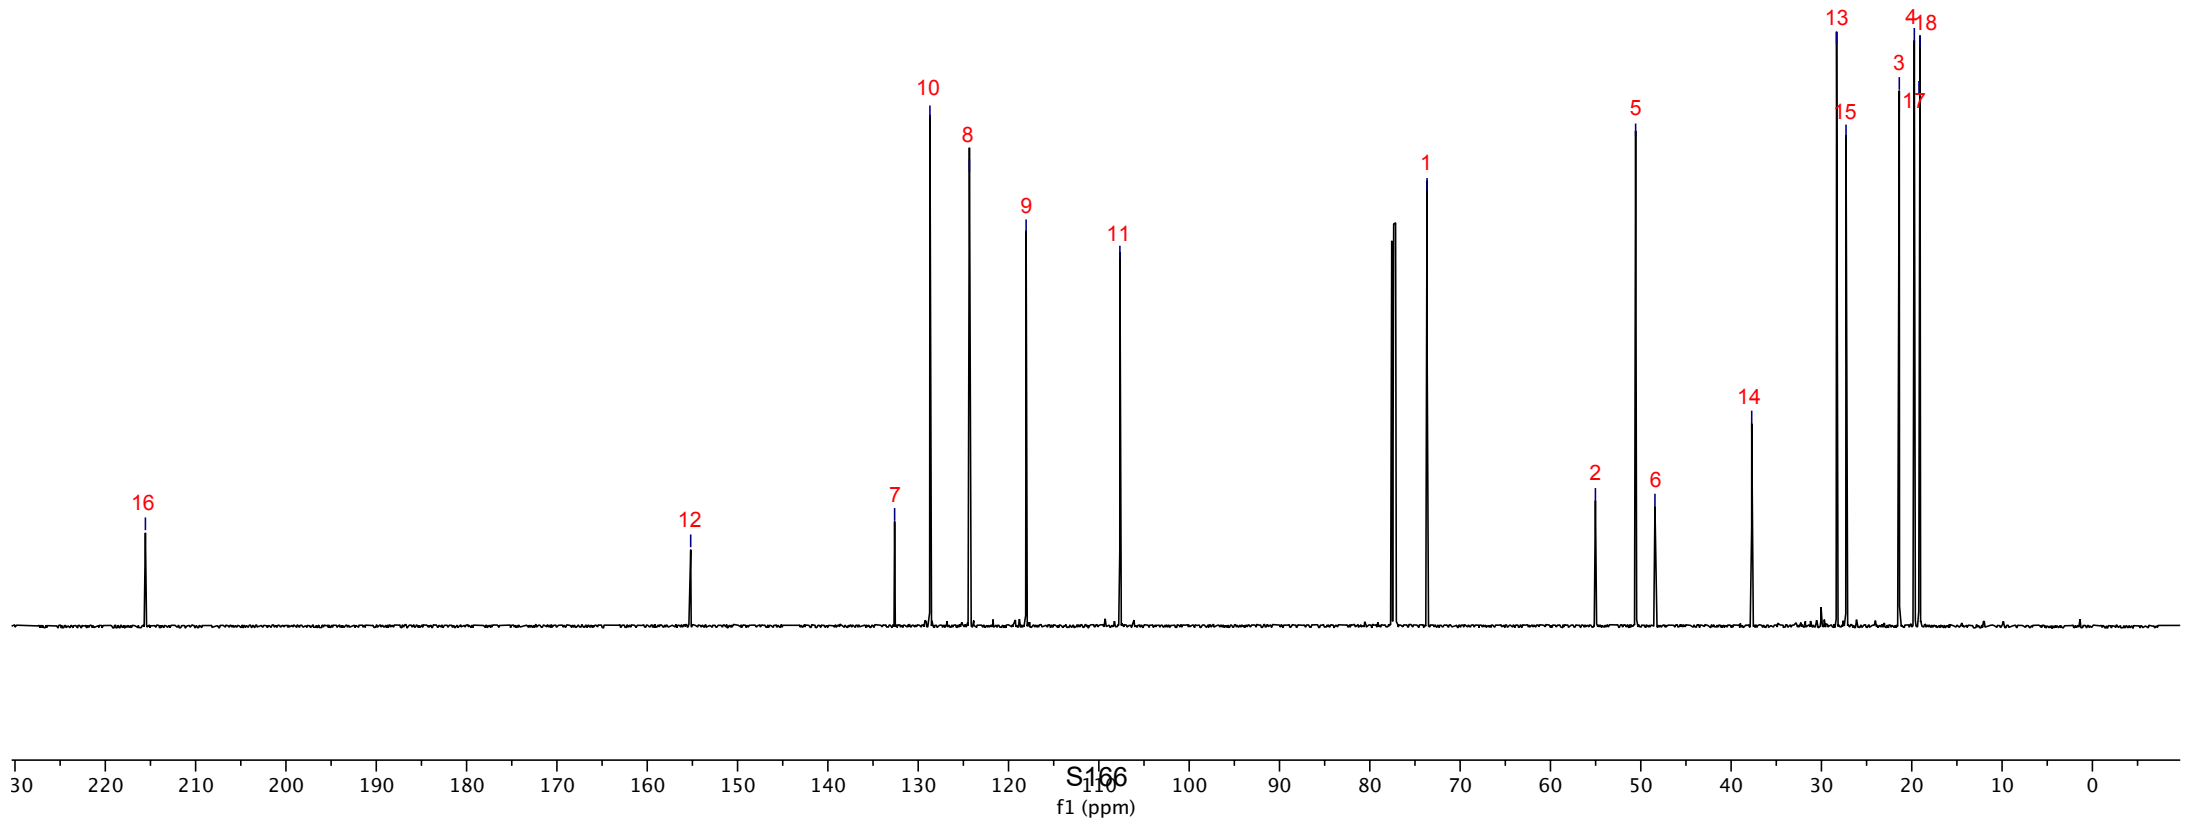

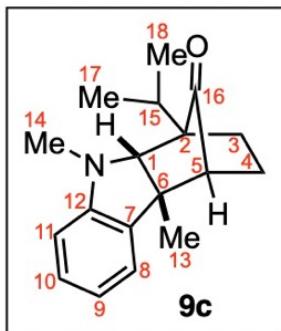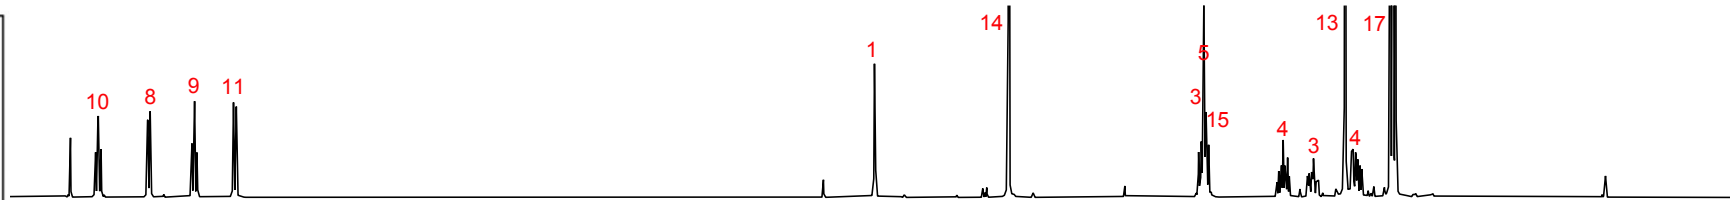

**COSY**

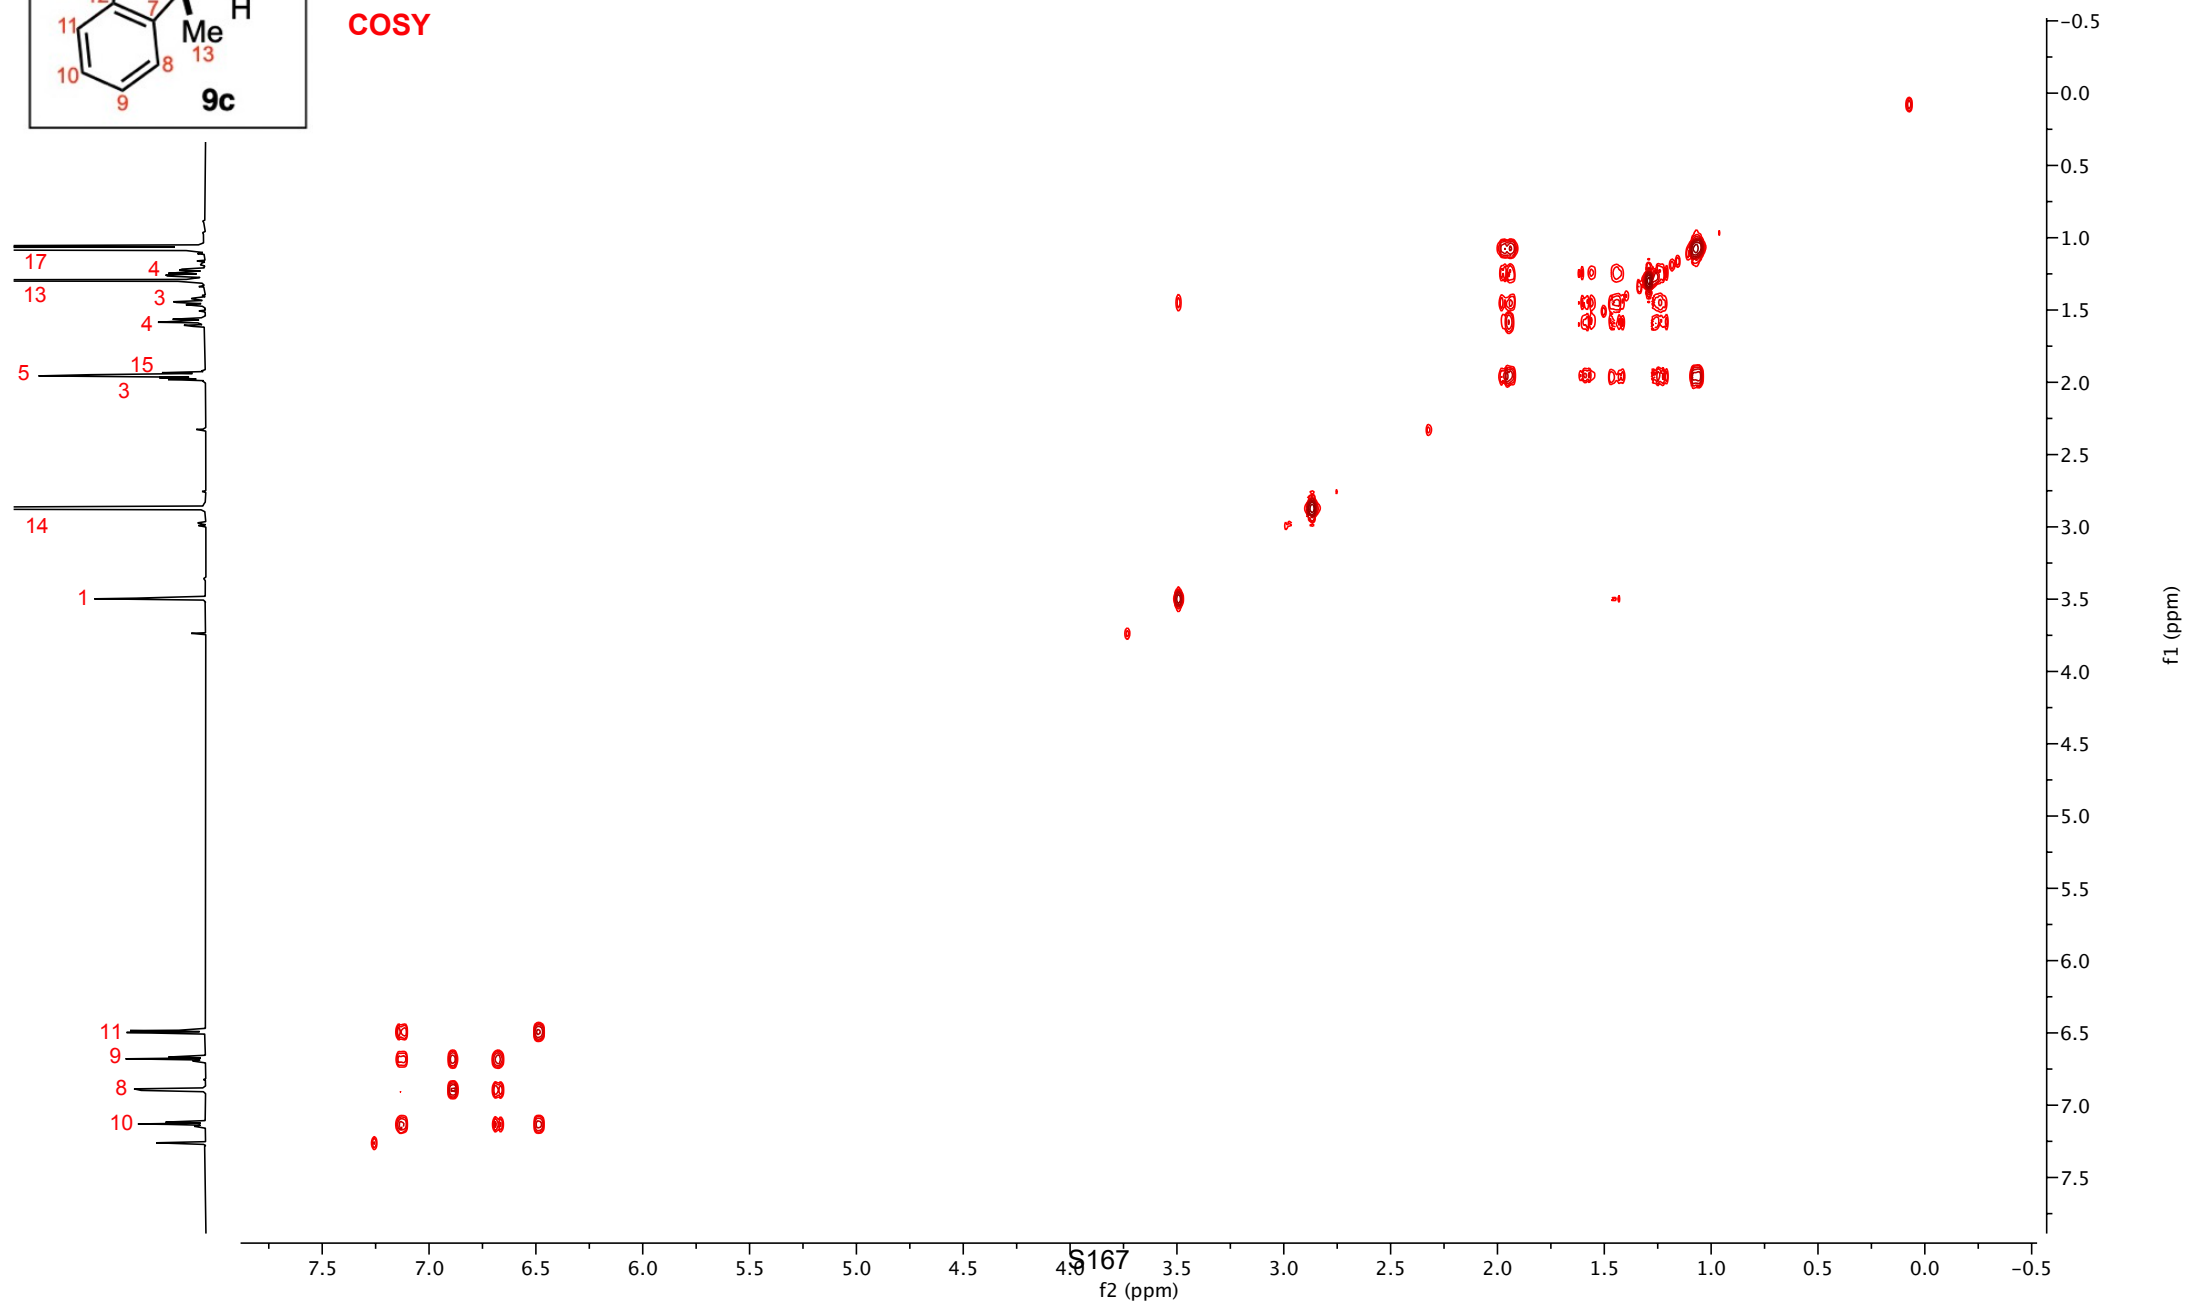



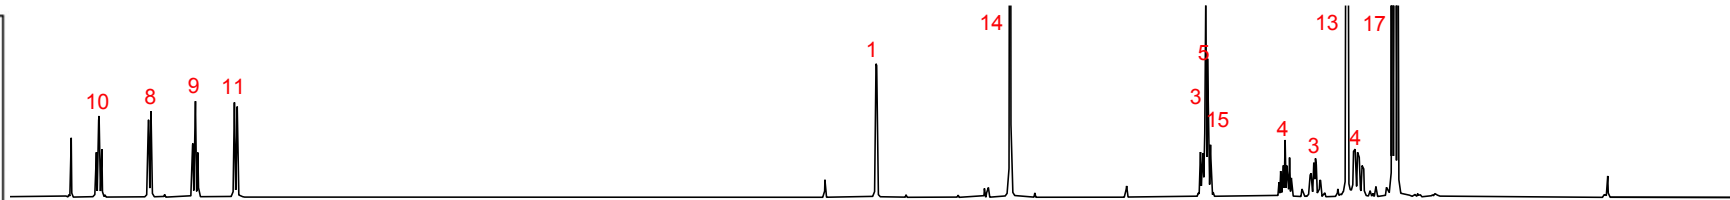

**HSQC**

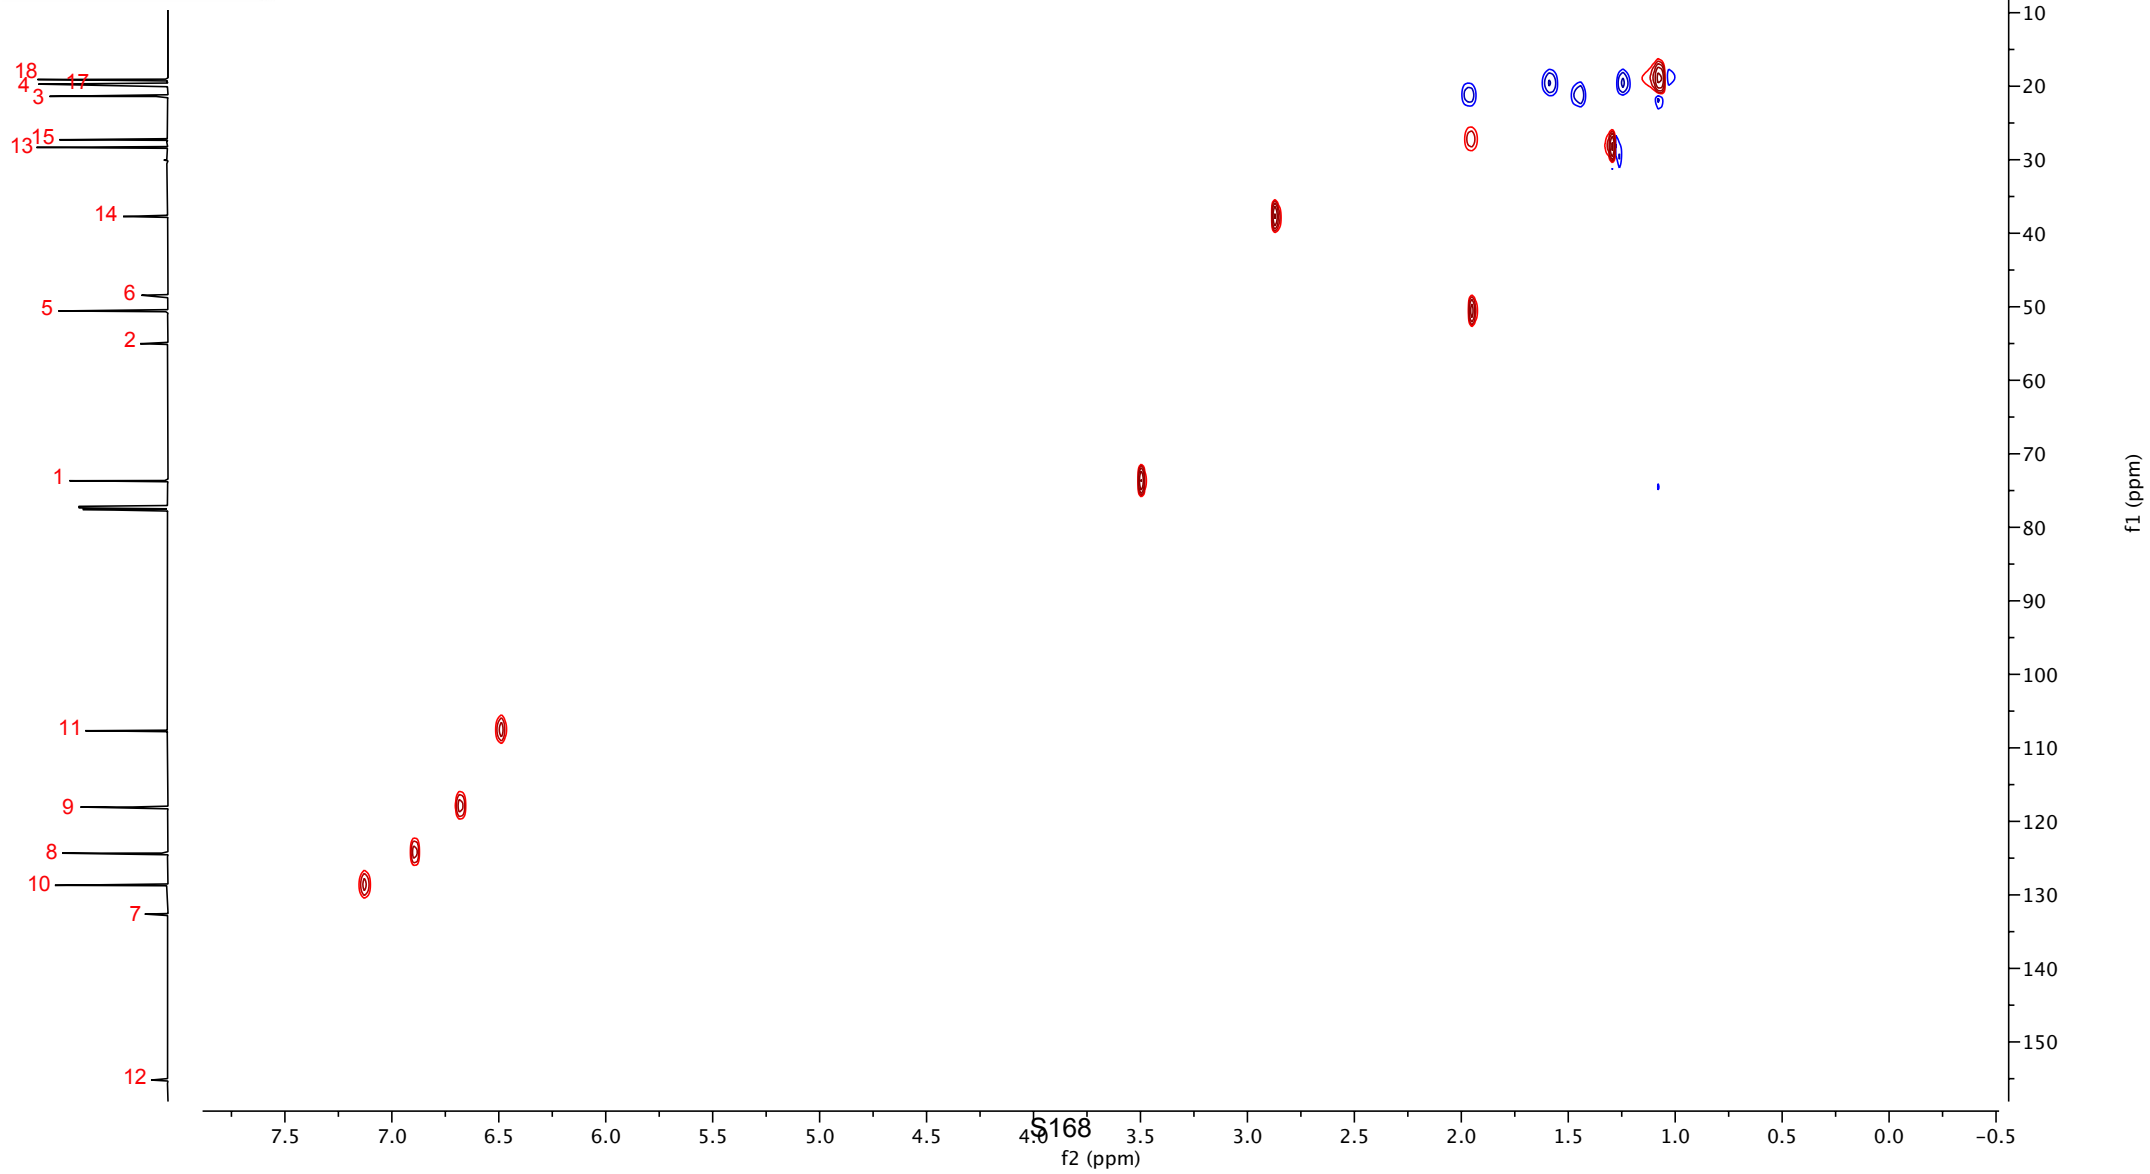

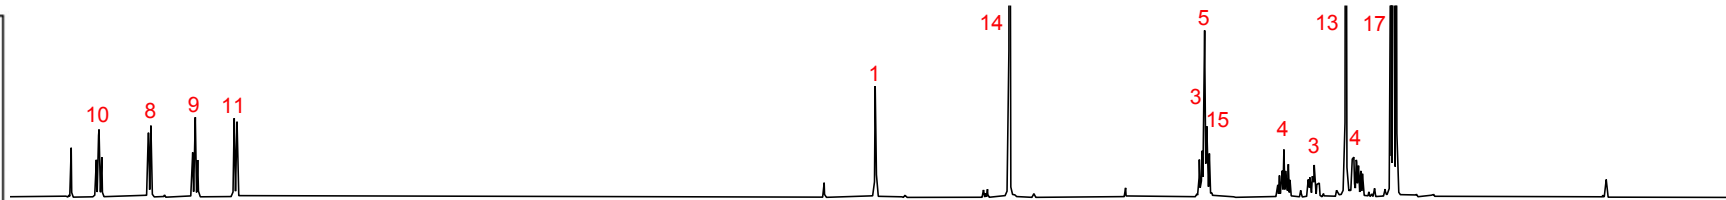

**HMBC**

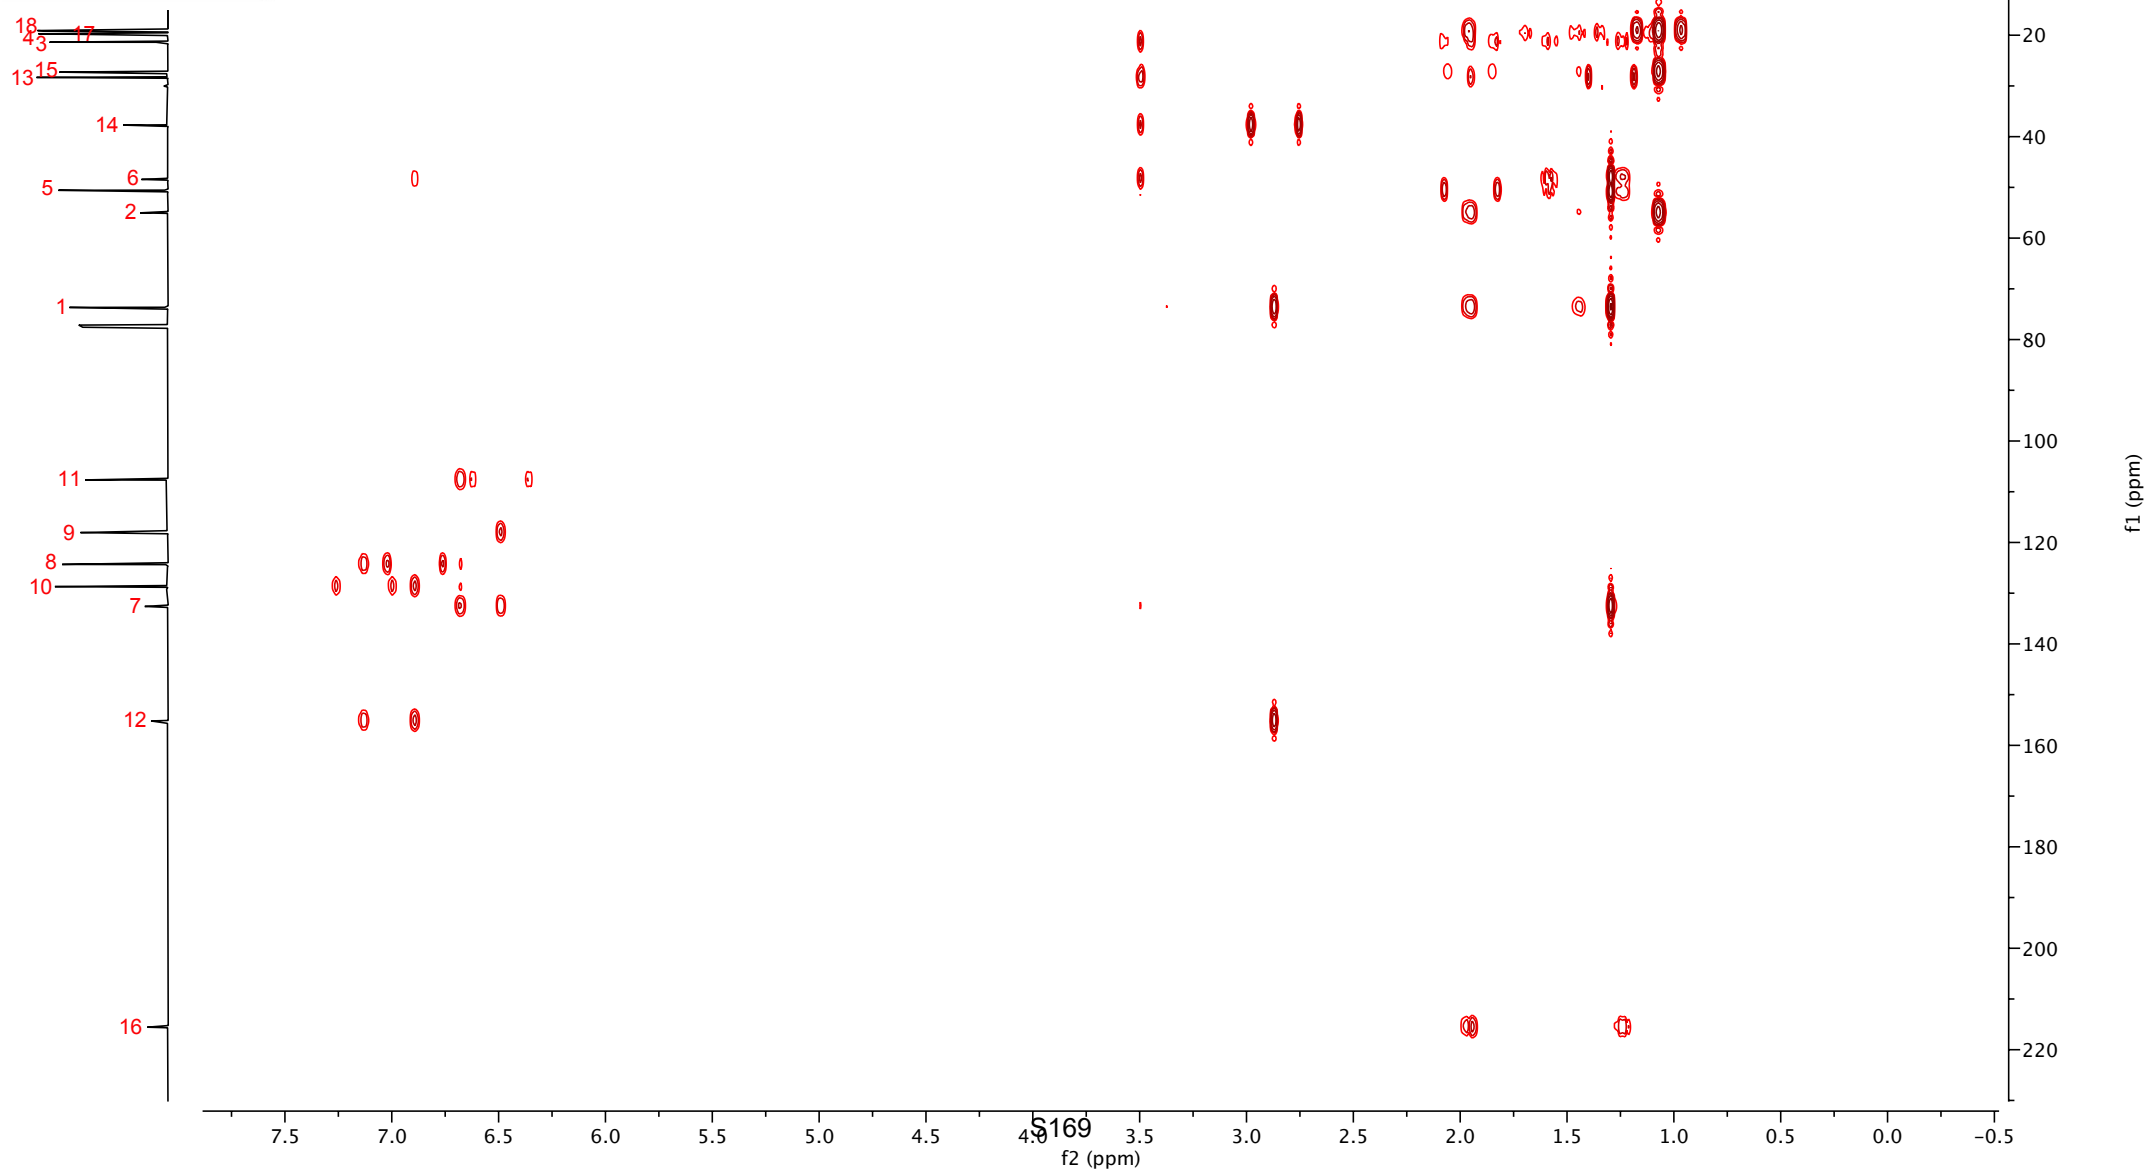

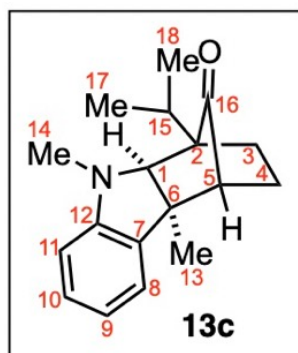

7.05  
7.05  
7.04  
7.04  
7.03  
7.03  
6.90  
6.89  
6.88  
6.88  
6.65  
6.65  
6.64  
6.64  
6.63  
6.63  
6.40  
6.38

3.10  
2.90

2.27  
2.27  
2.25  
2.25  
2.24  
2.24  
2.23  
2.23  
2.22  
2.21  
2.20

2.00  
1.99  
1.98  
1.98  
1.97  
1.96  
1.96  
1.94  
1.94  
1.92  
1.92  
1.90  
1.90  
1.90  
1.72  
1.71  
1.71  
1.70  
1.70  
1.70  
1.69  
1.69  
1.45  
1.45  
1.42  
1.41  
1.40  
1.40  
1.39  
1.39  
1.38  
1.38  
1.37  
1.37  
1.26  
1.02  
1.01  
0.94  
0.94

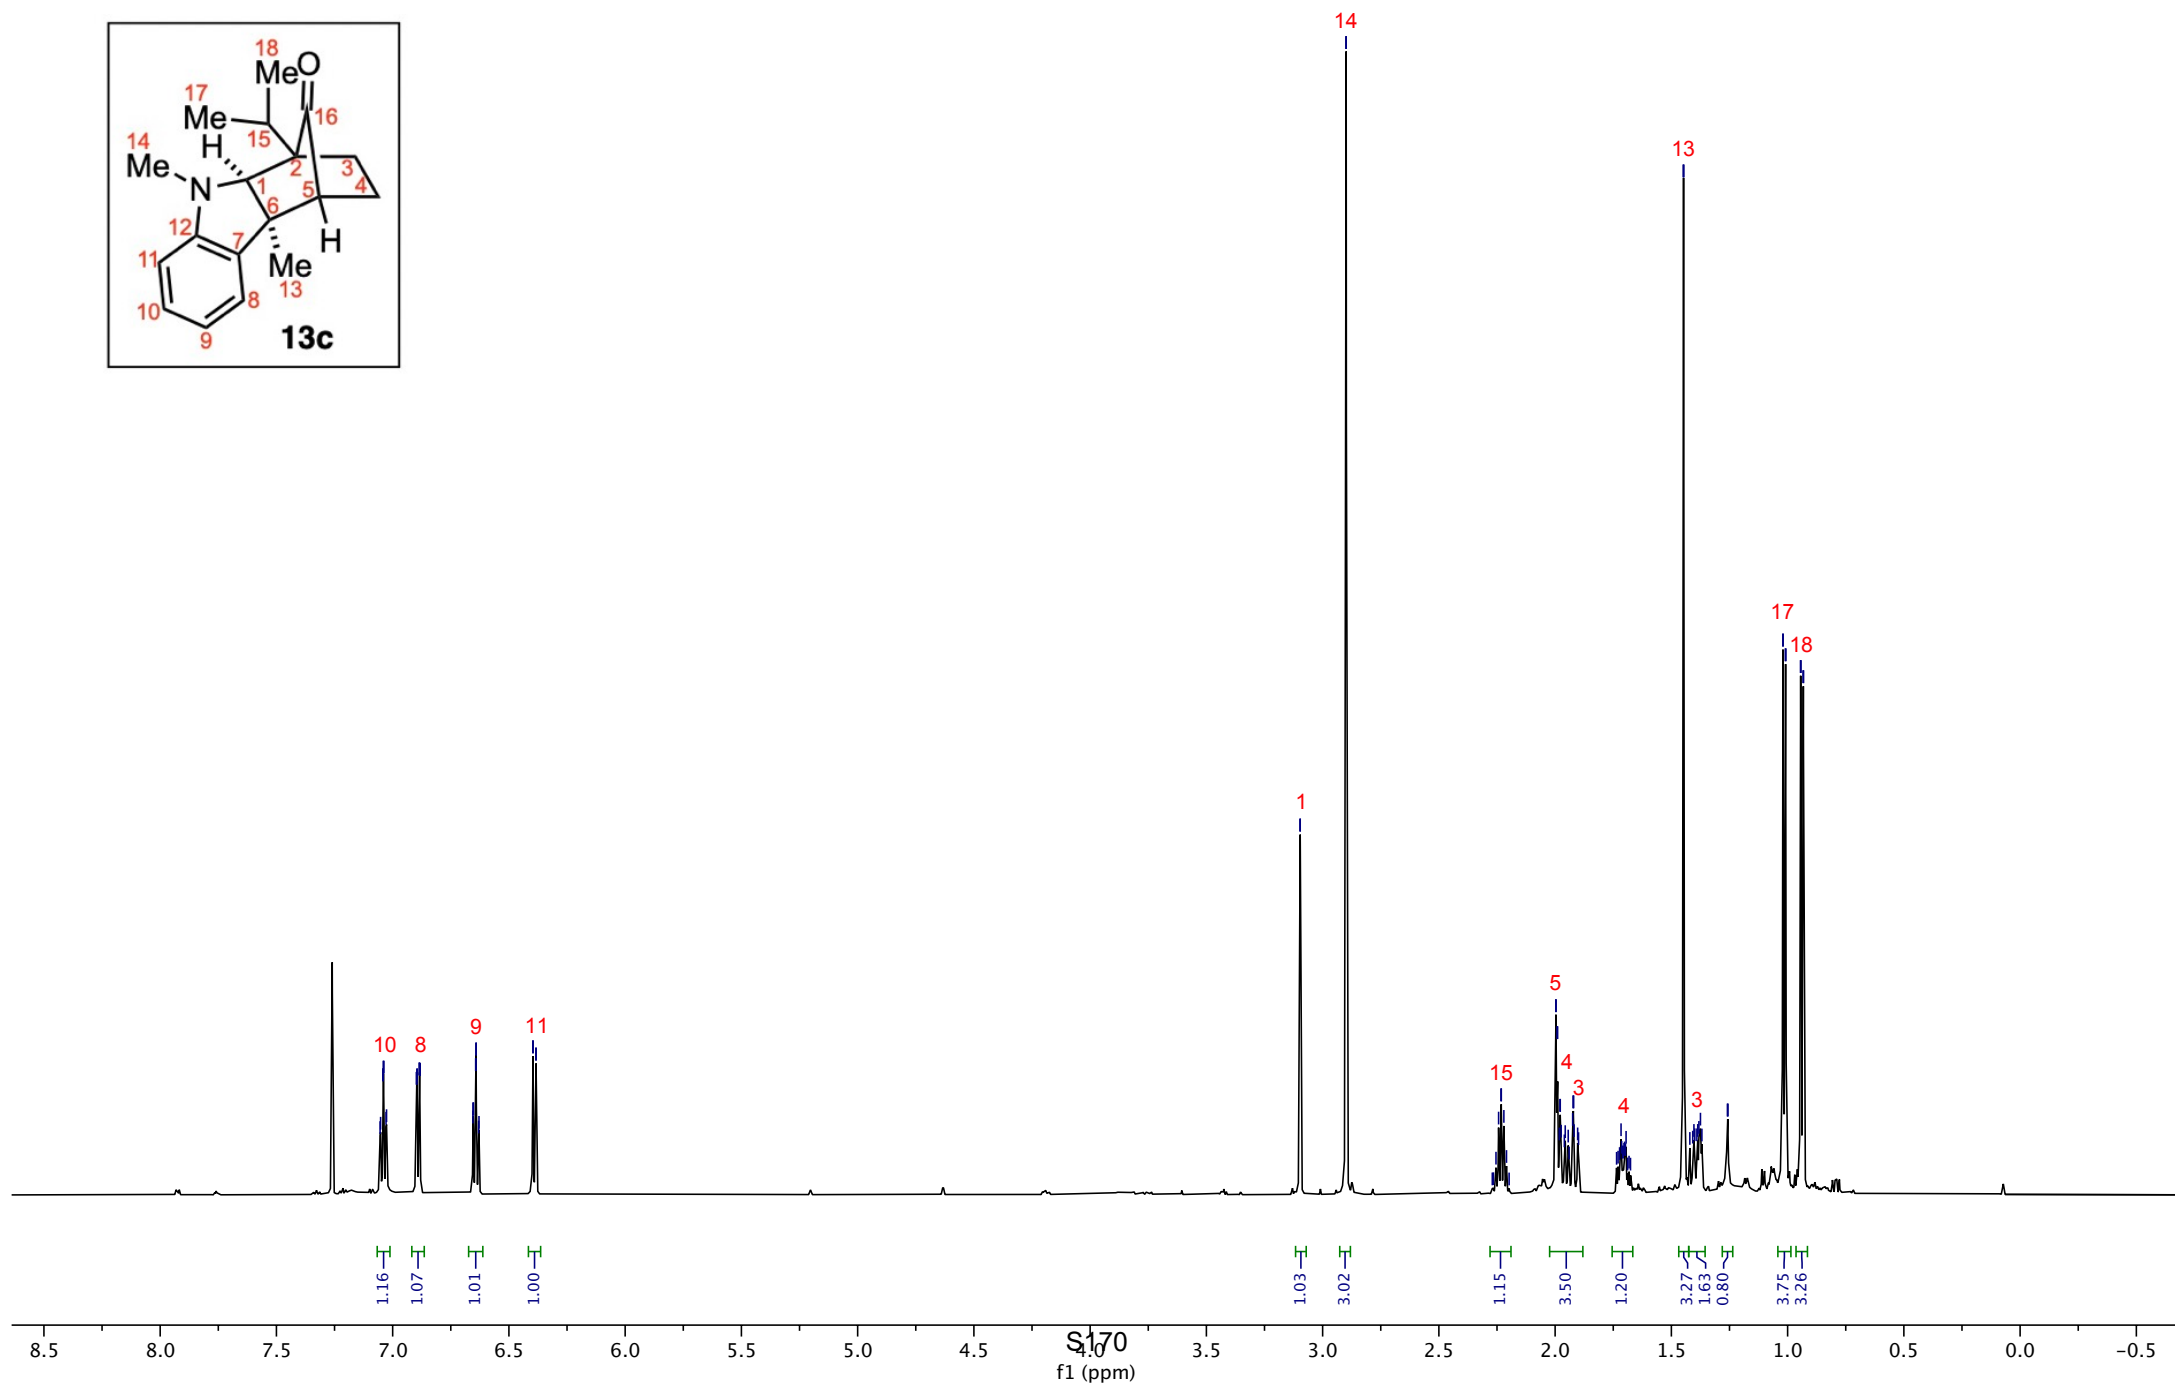

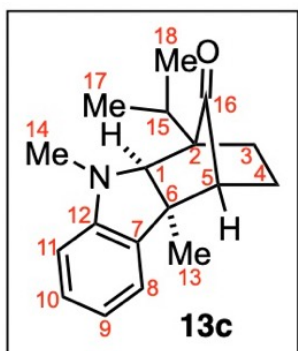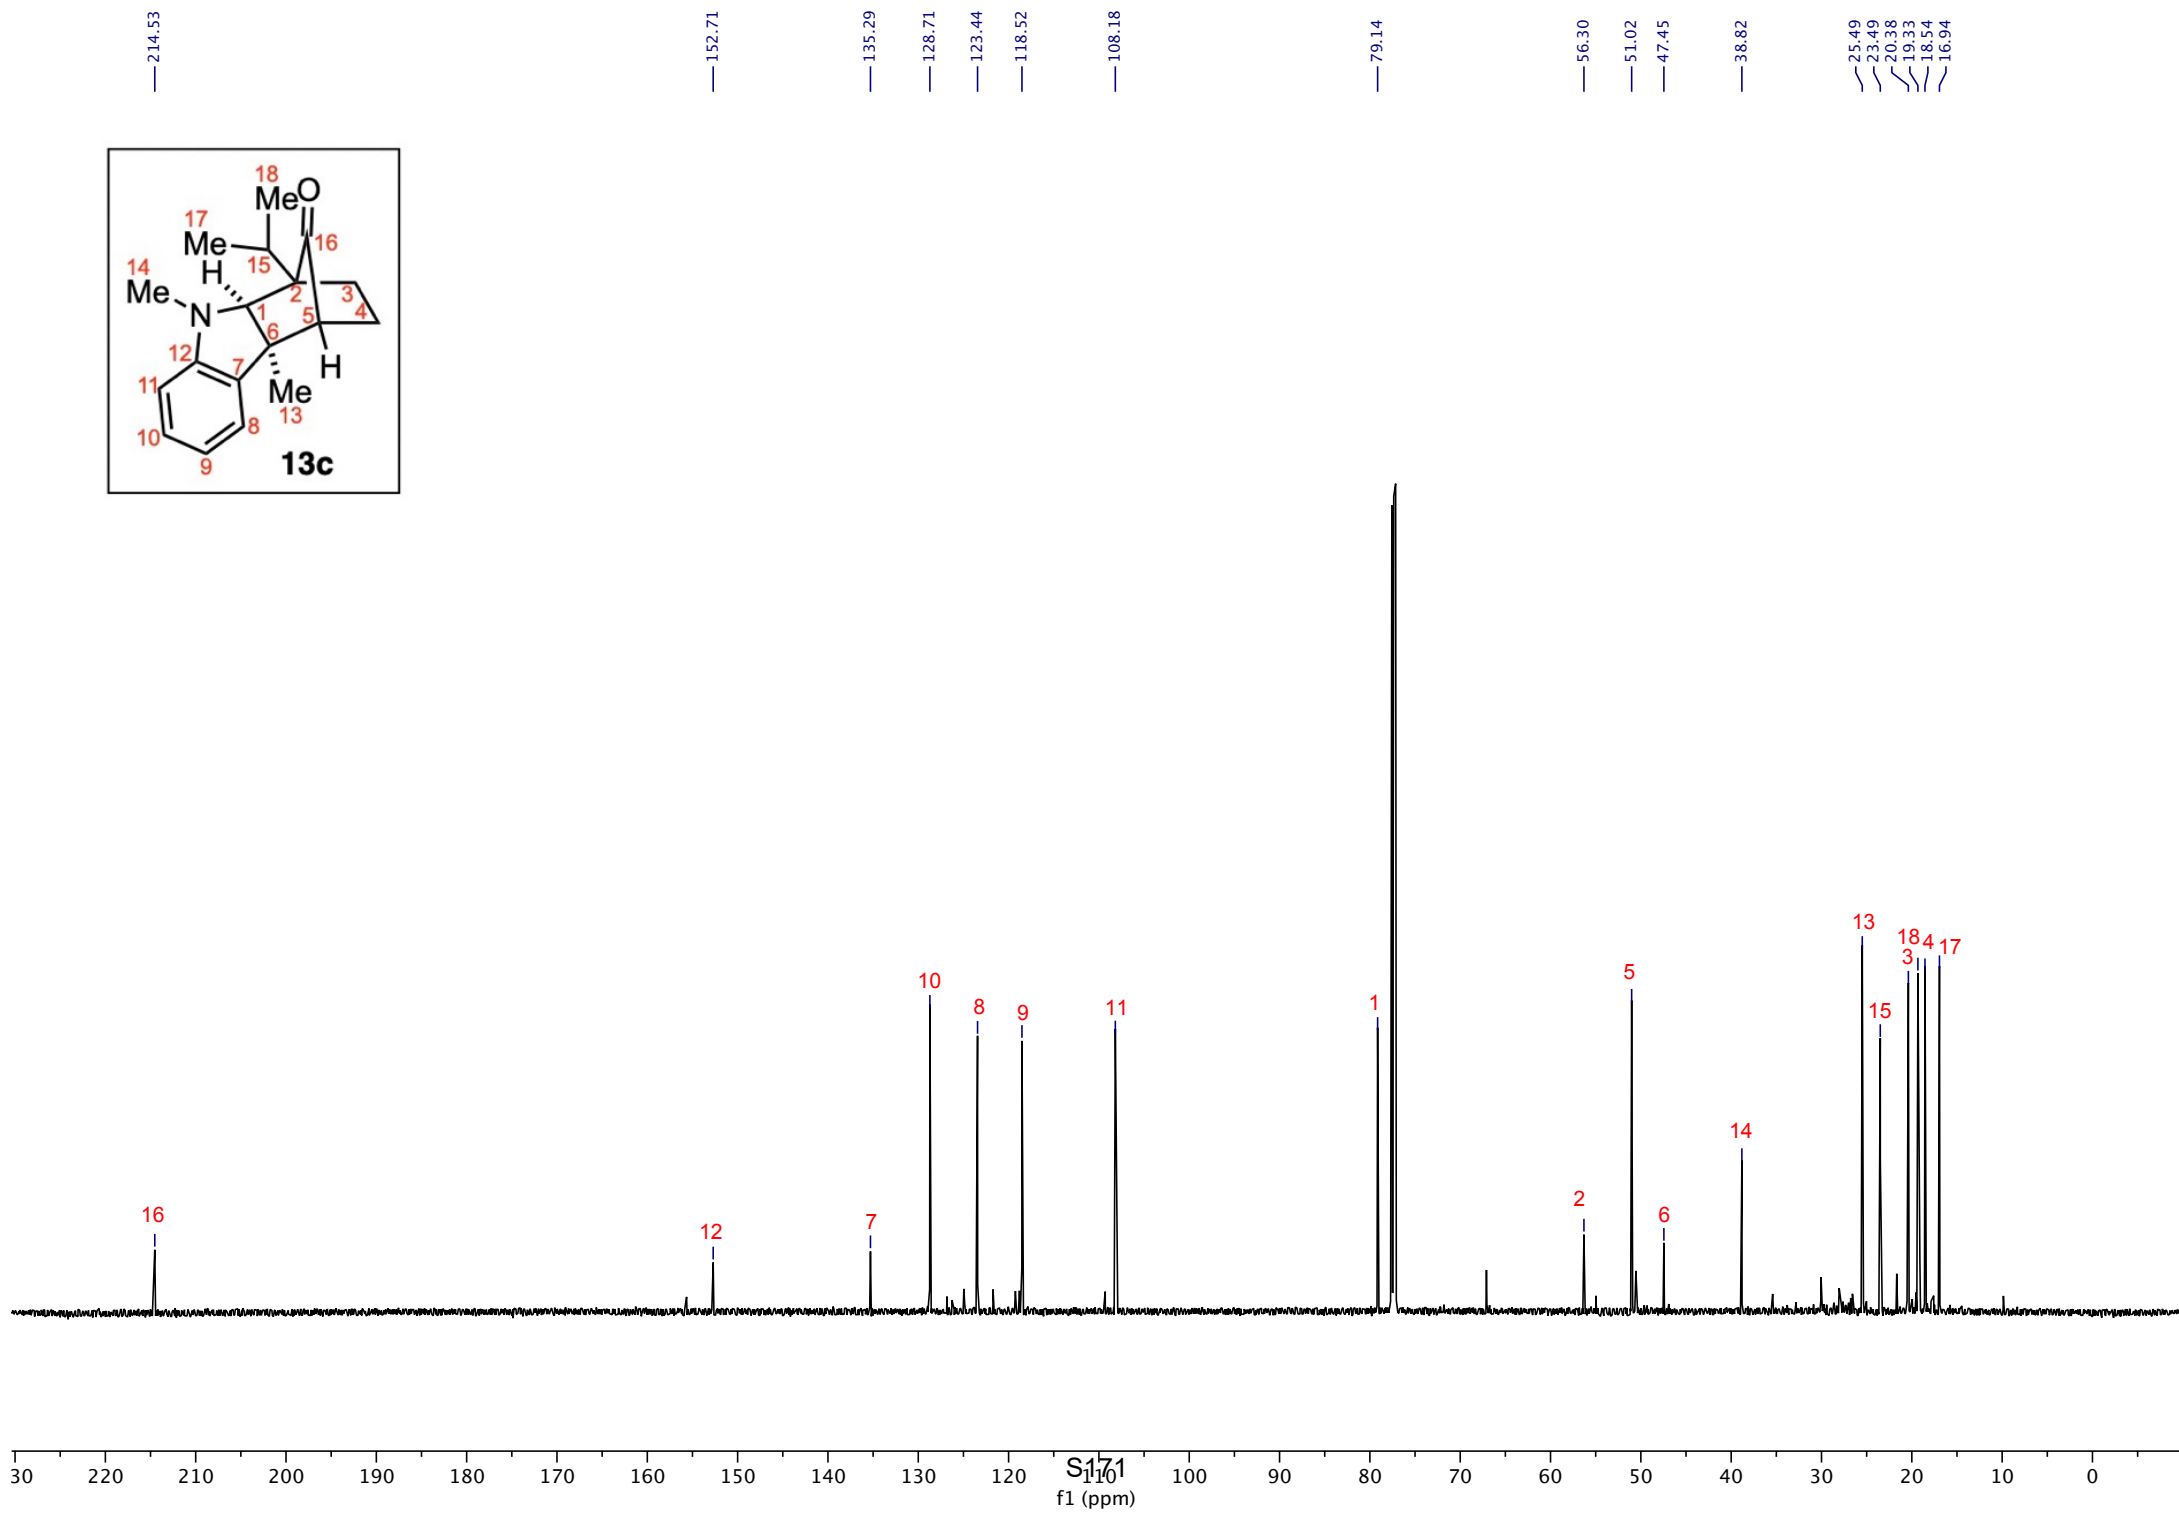

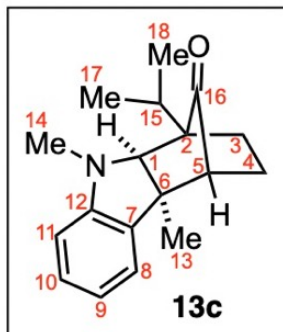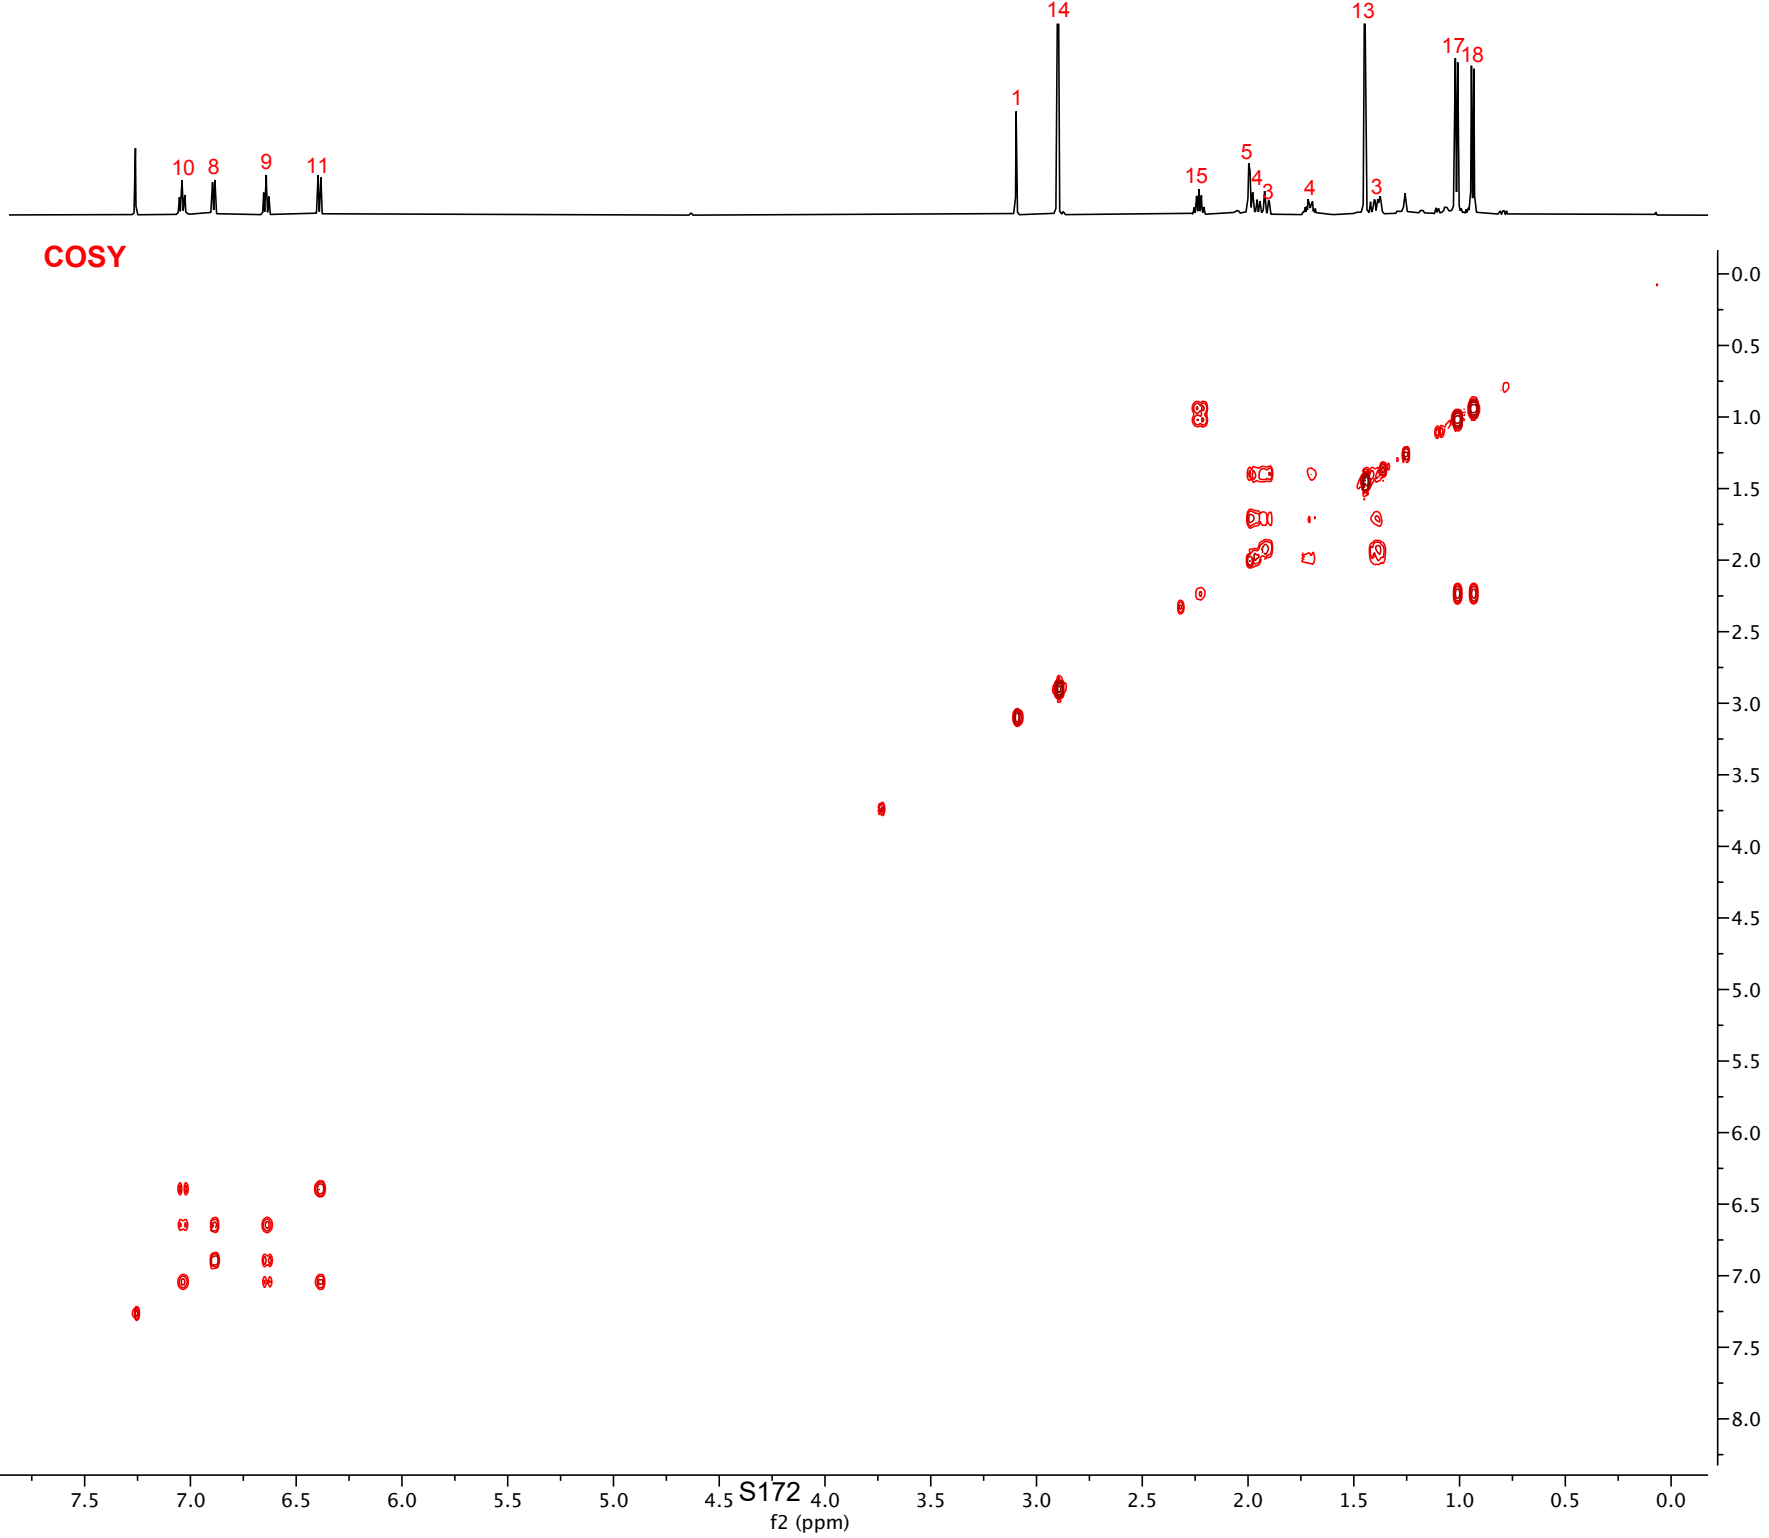

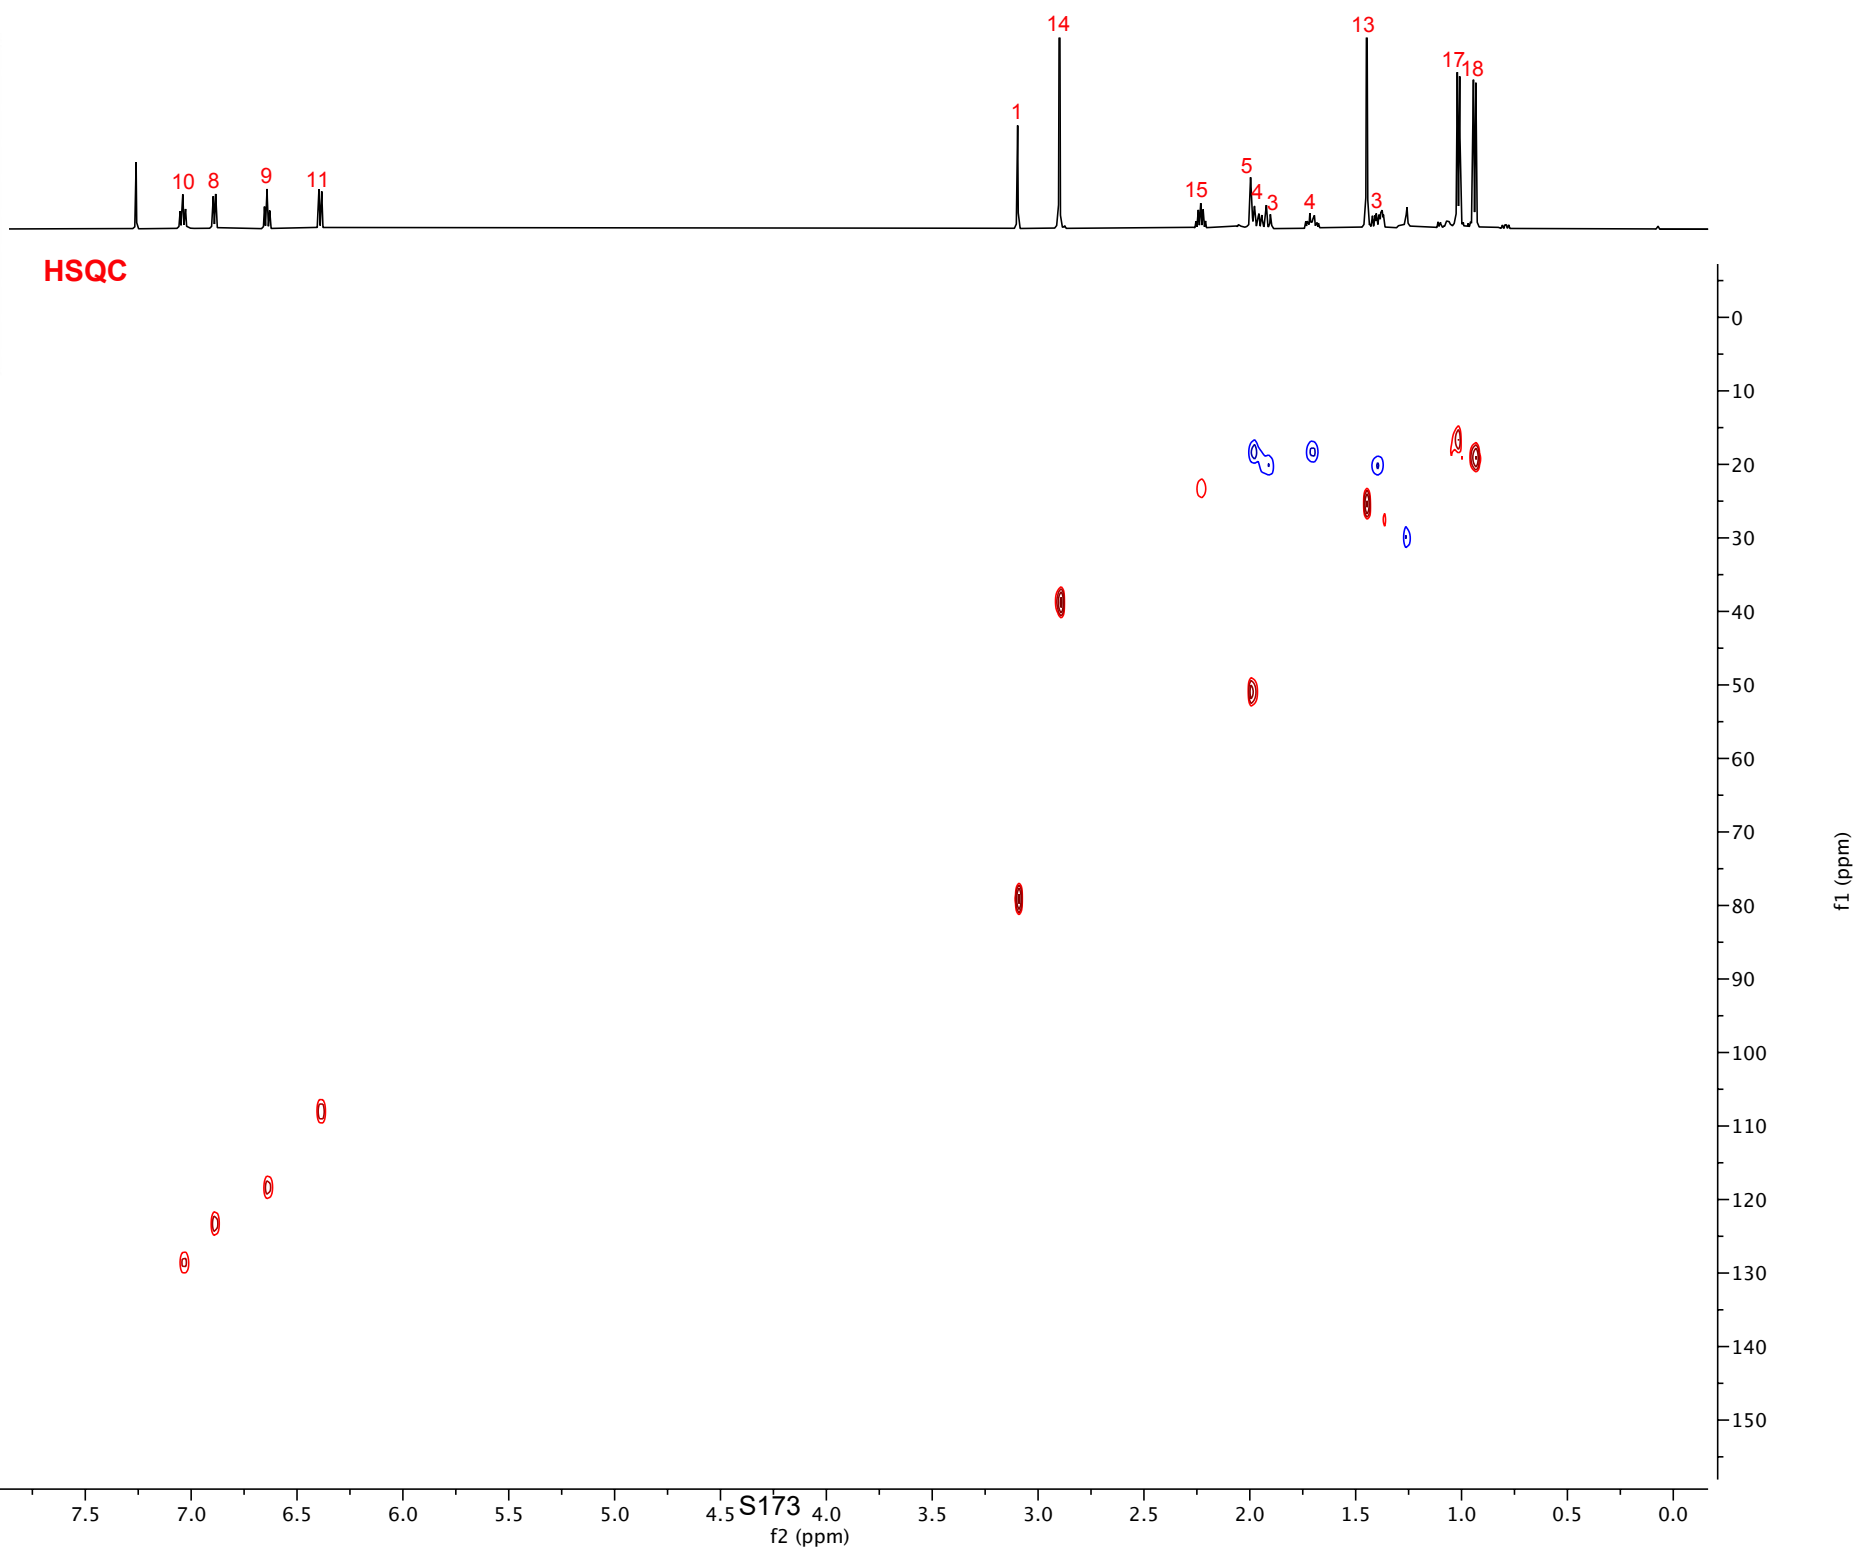

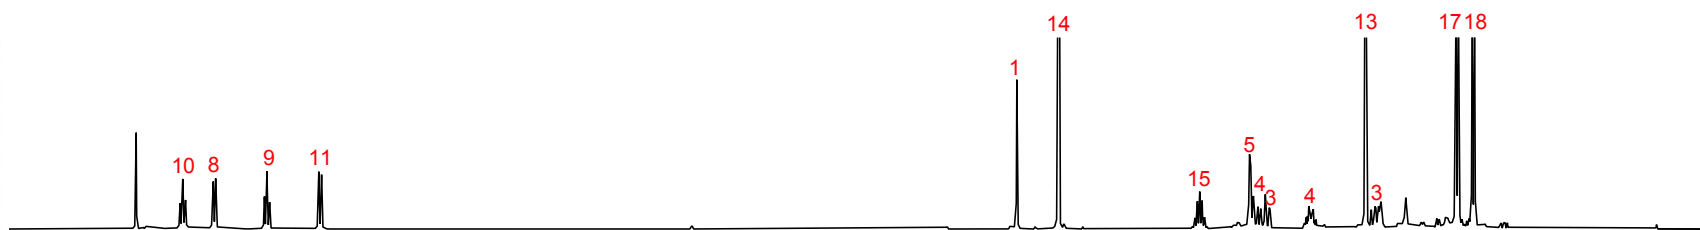

**HMBC**

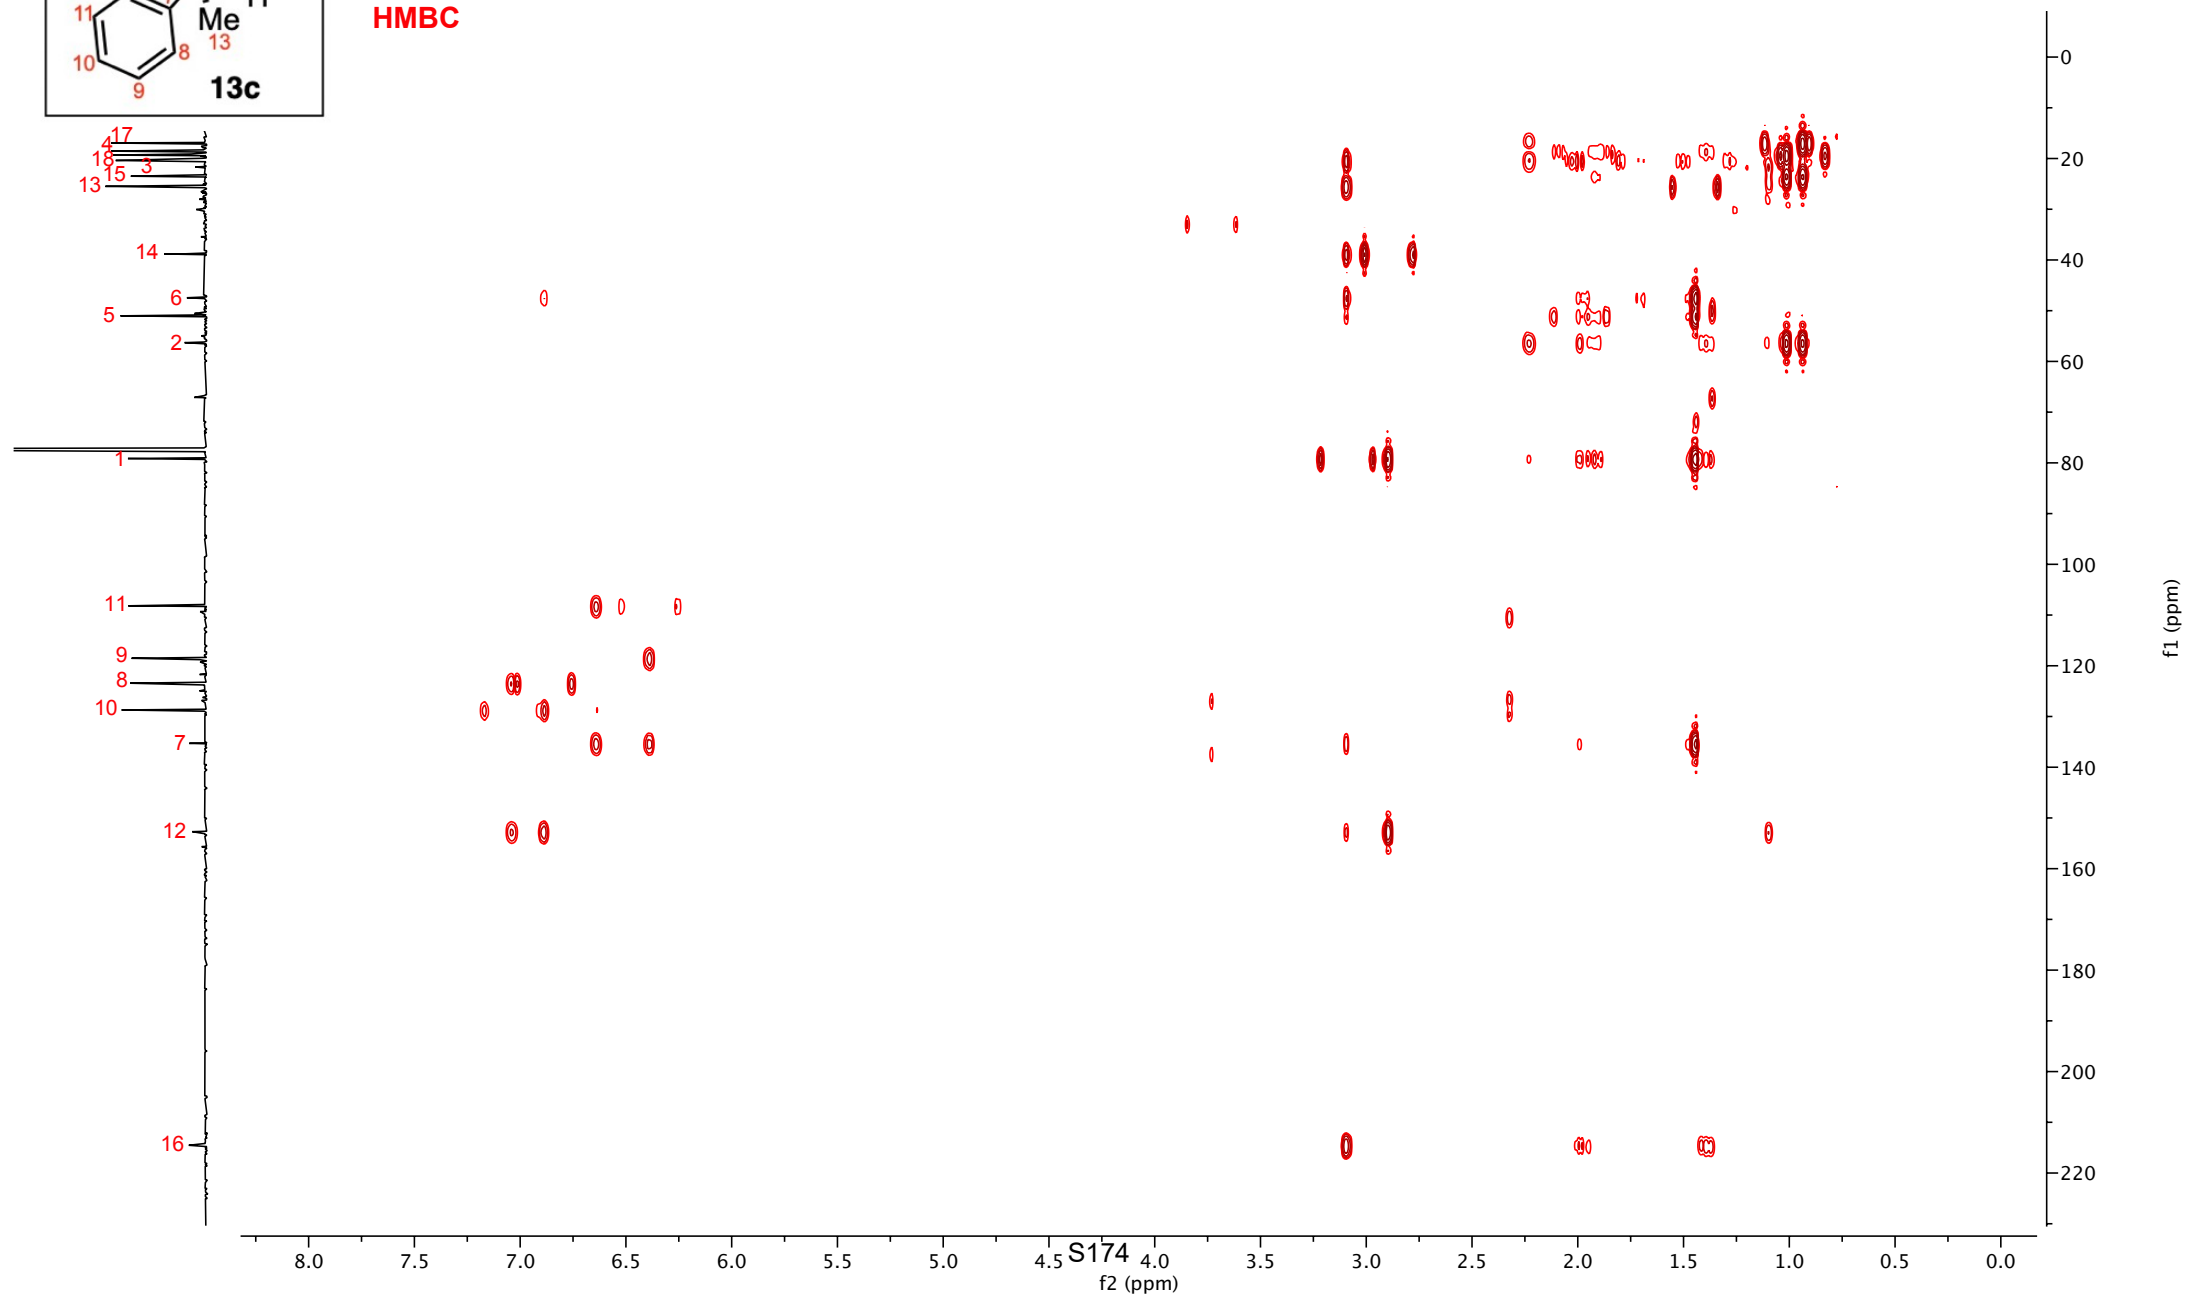

7.33  
7.33  
7.32  
7.32  
7.30  
7.30  
7.29  
7.29  
7.28  
7.28  
7.23  
7.23  
7.22  
7.22  
7.12  
7.11  
7.10  
7.10  
7.09  
6.98  
6.87  
6.86  
6.86  
6.64  
6.64  
6.63  
6.63  
6.62  
6.62  
6.40  
6.38

3.25  
3.25  
3.03  
3.01  
2.96  
2.93  
2.66

2.01  
2.01  
1.99  
1.98  
1.97  
1.96  
1.95  
1.94  
1.64  
1.63  
1.62  
1.62  
1.61  
1.60  
1.59  
1.59  
1.58  
1.57  
1.44  
1.43  
1.43  
1.43  
1.42  
1.41  
1.41  
1.41  
1.40  
1.39  
1.39  
1.39  
1.31  
1.30  
1.29  
1.29  
1.28  
1.28  
1.27  
1.26

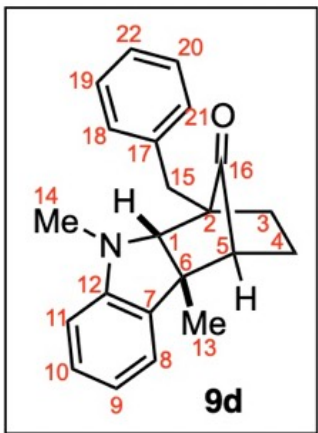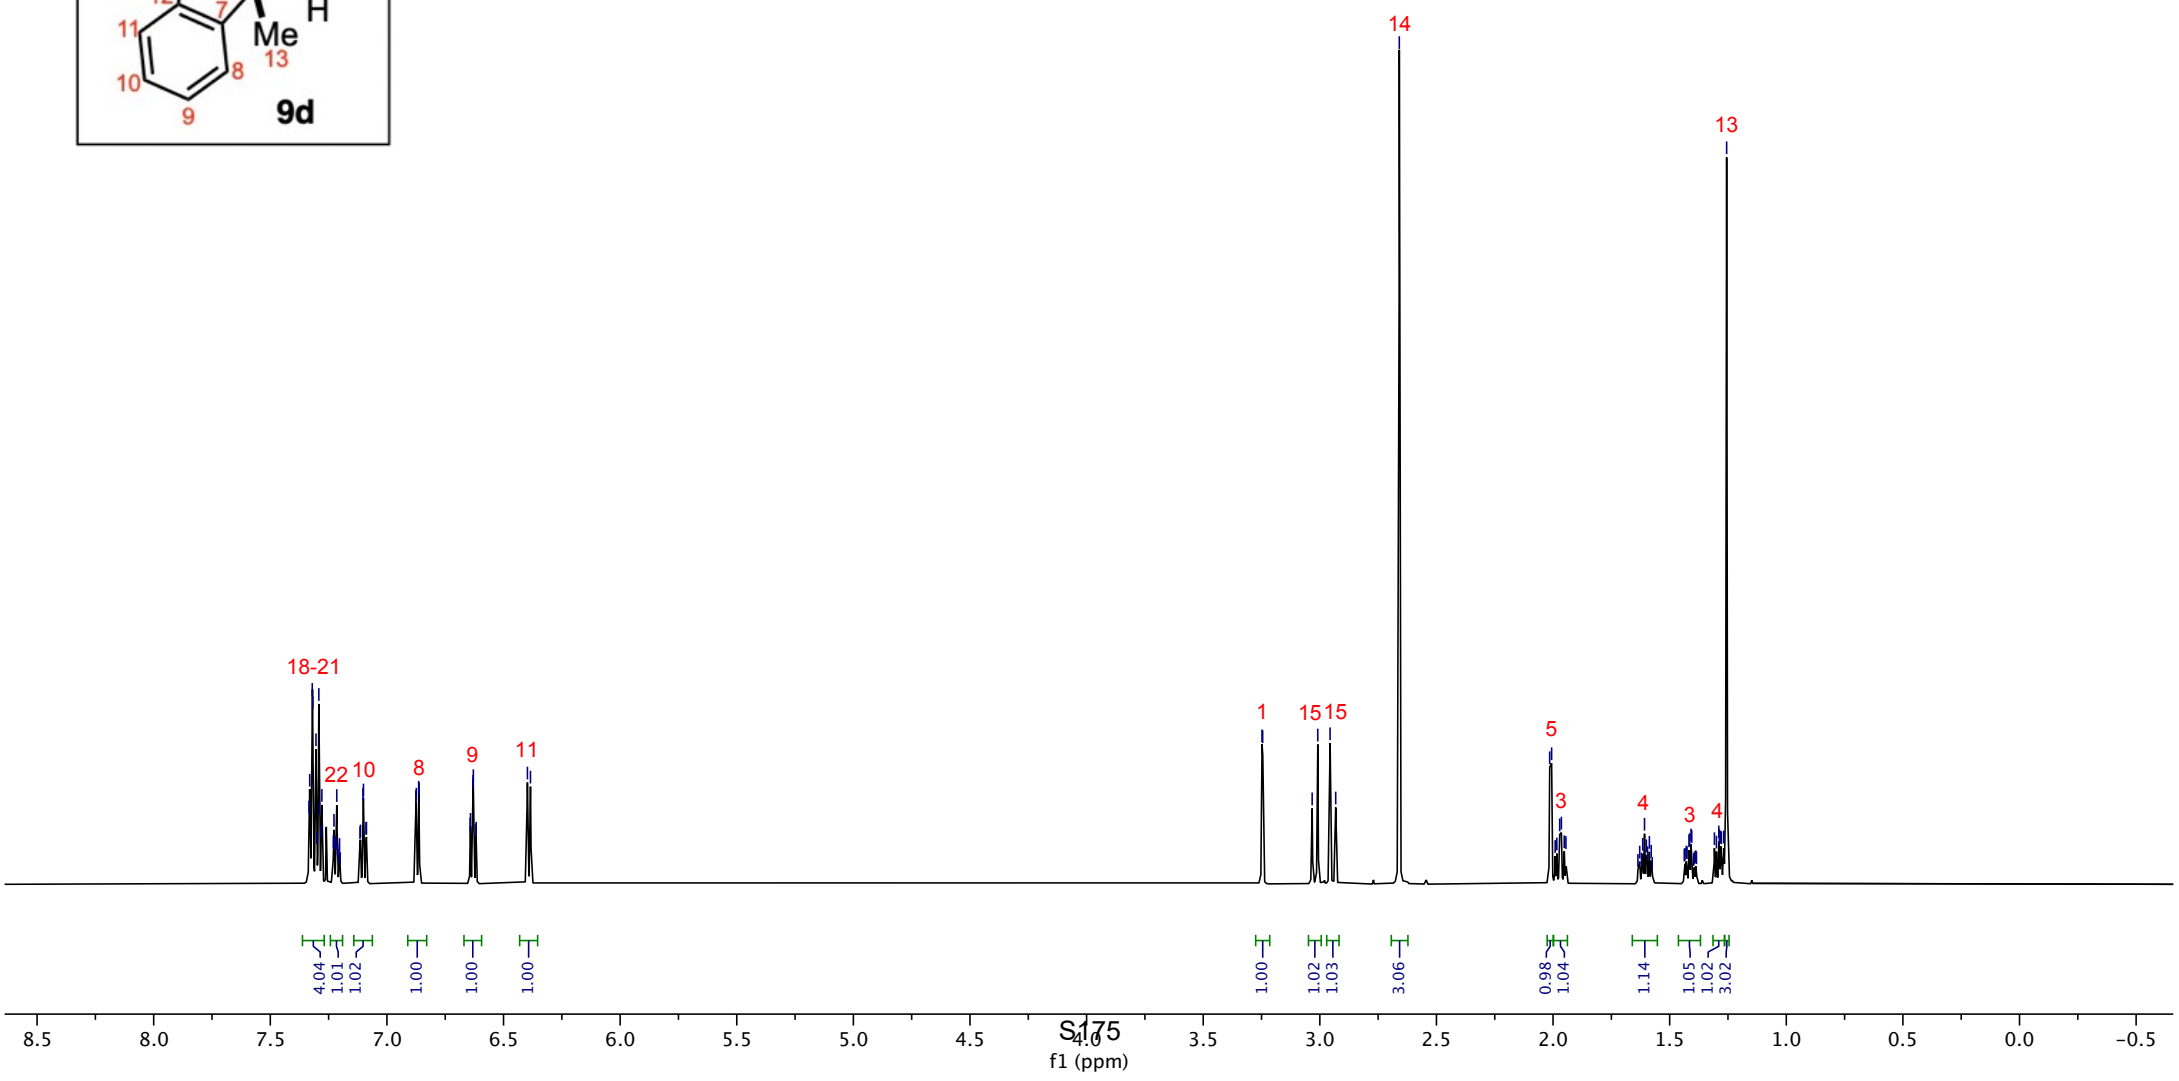



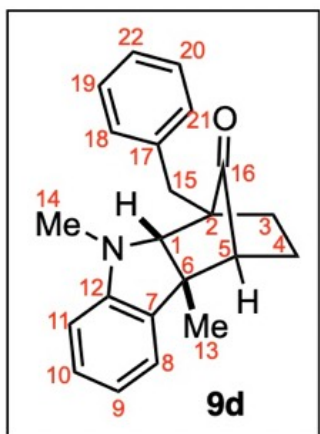

— 215.28 — 154.44 — 138.78 — 131.89 — 130.66 — 128.74 — 128.67 — 126.63 — 124.23 — 117.45 — 106.32 — 75.17 — 53.15 — 50.36 — 48.38 — 35.84 — 35.68 — 27.73 — 22.48 — 19.81

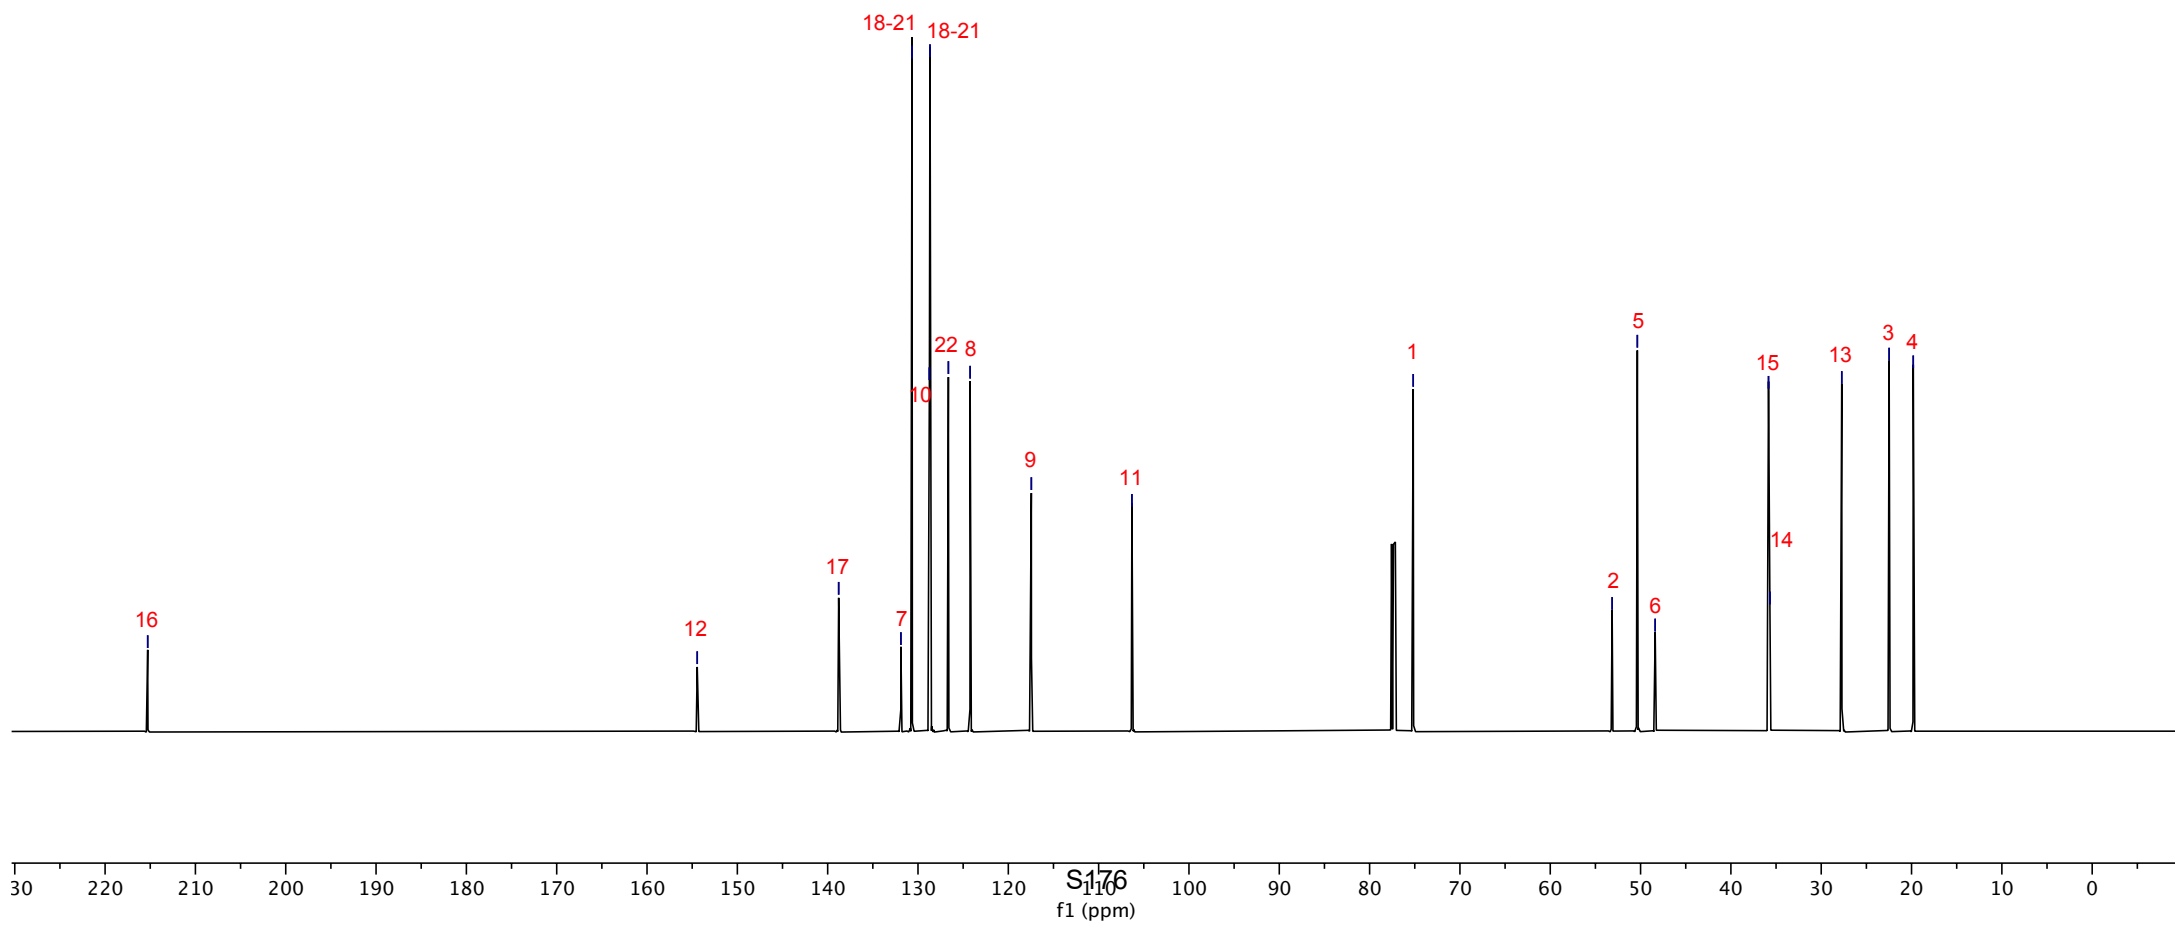

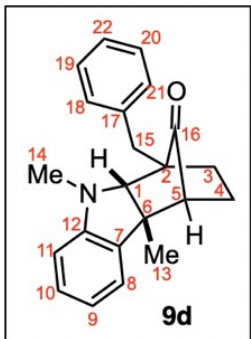

**COSY**

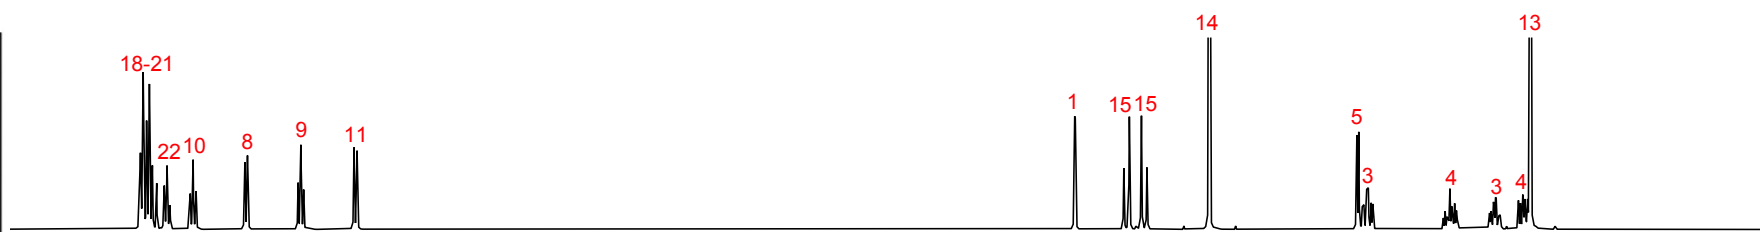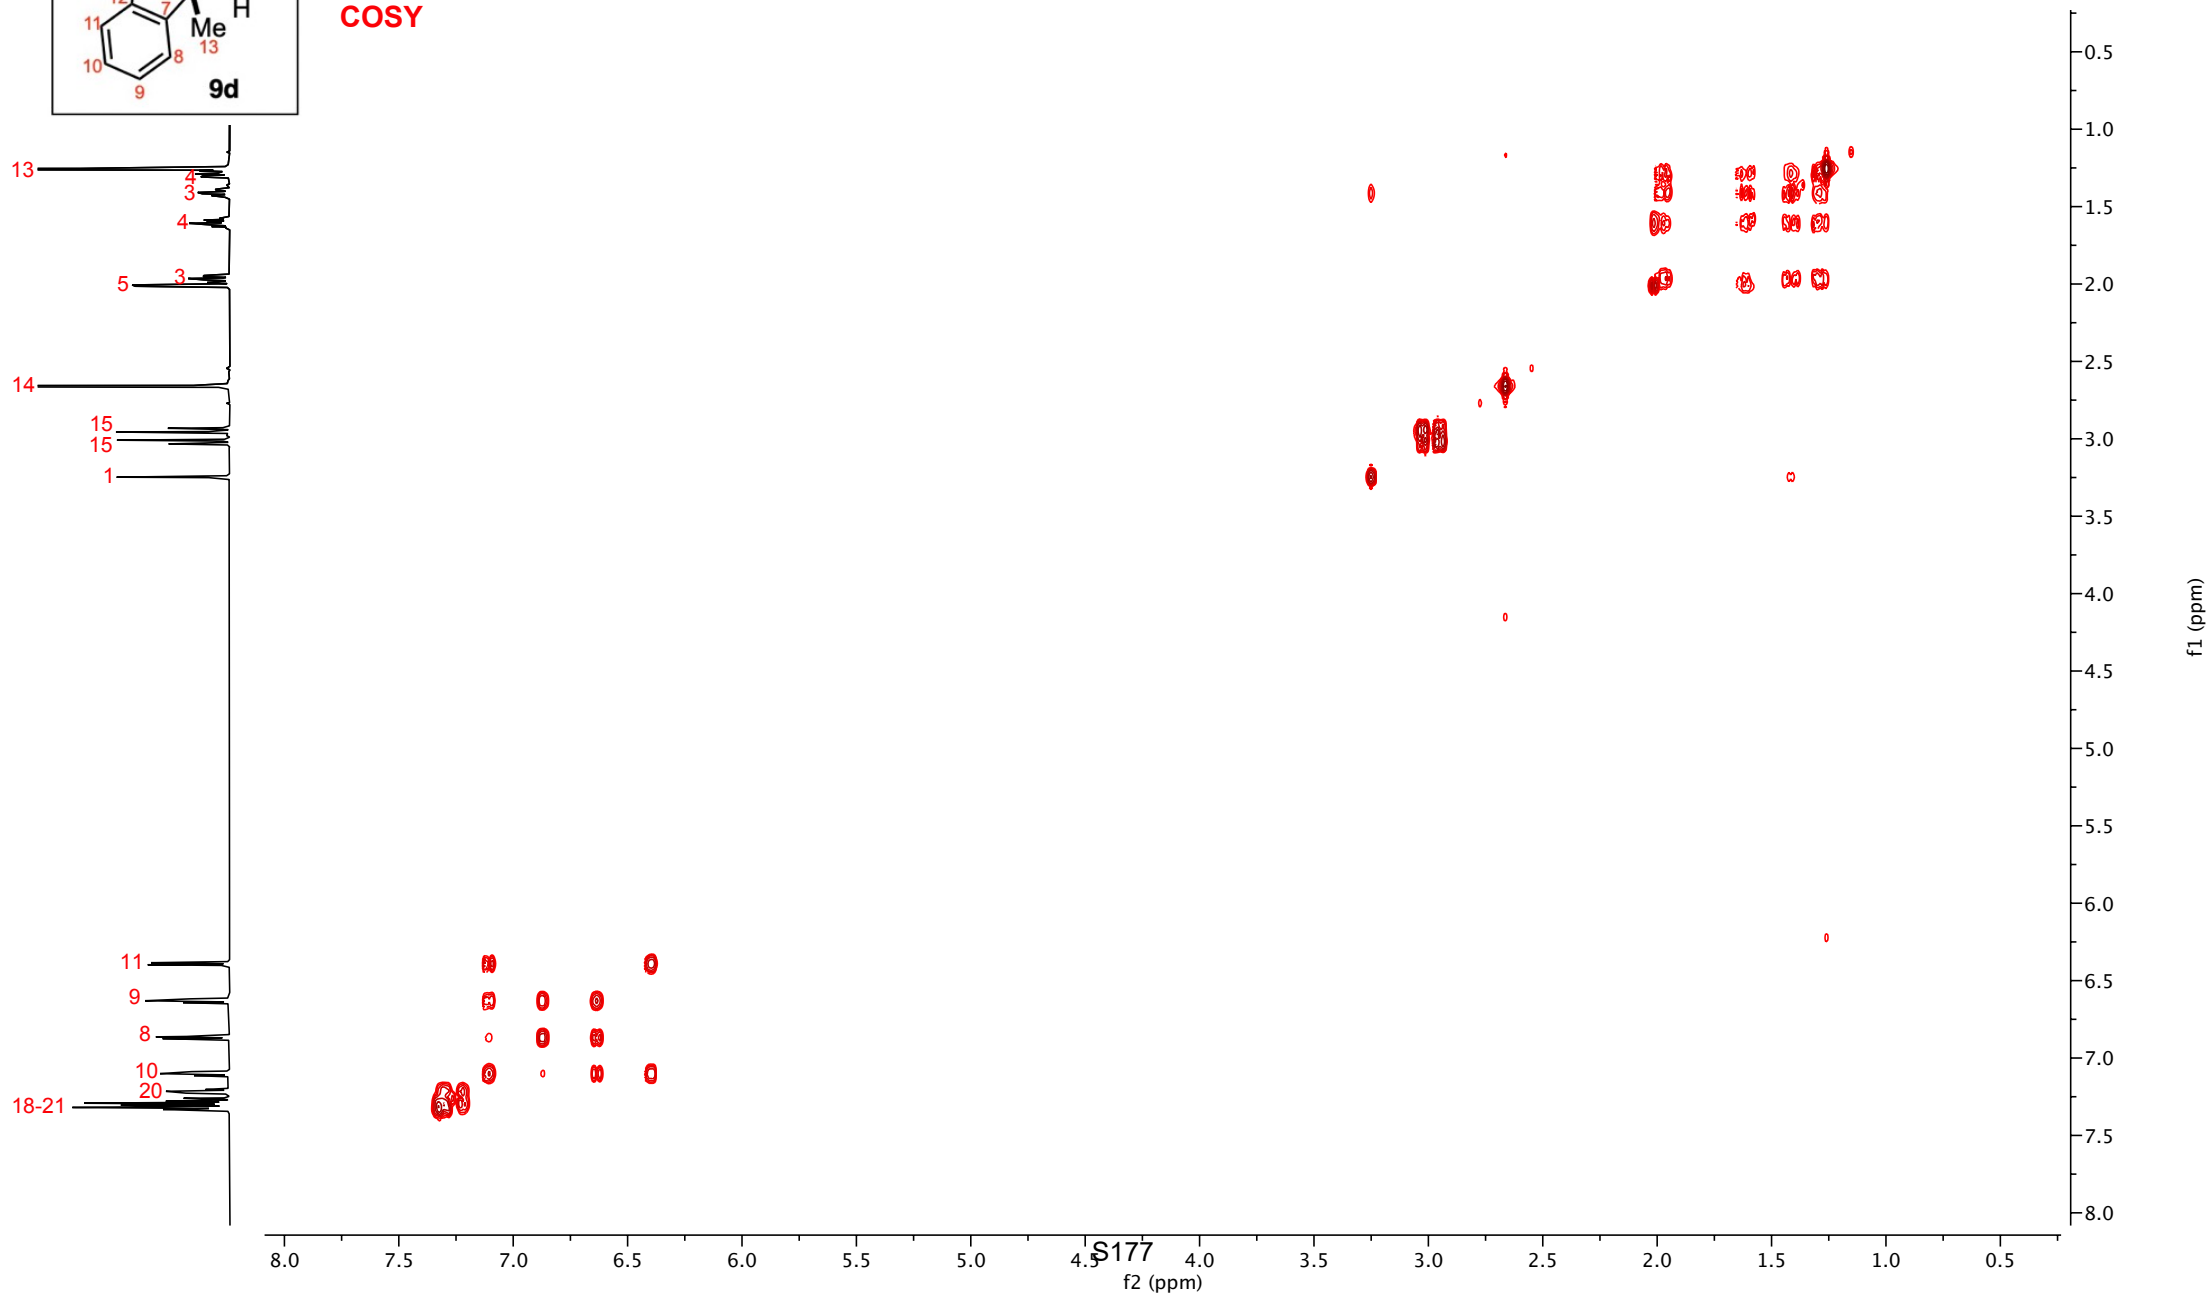

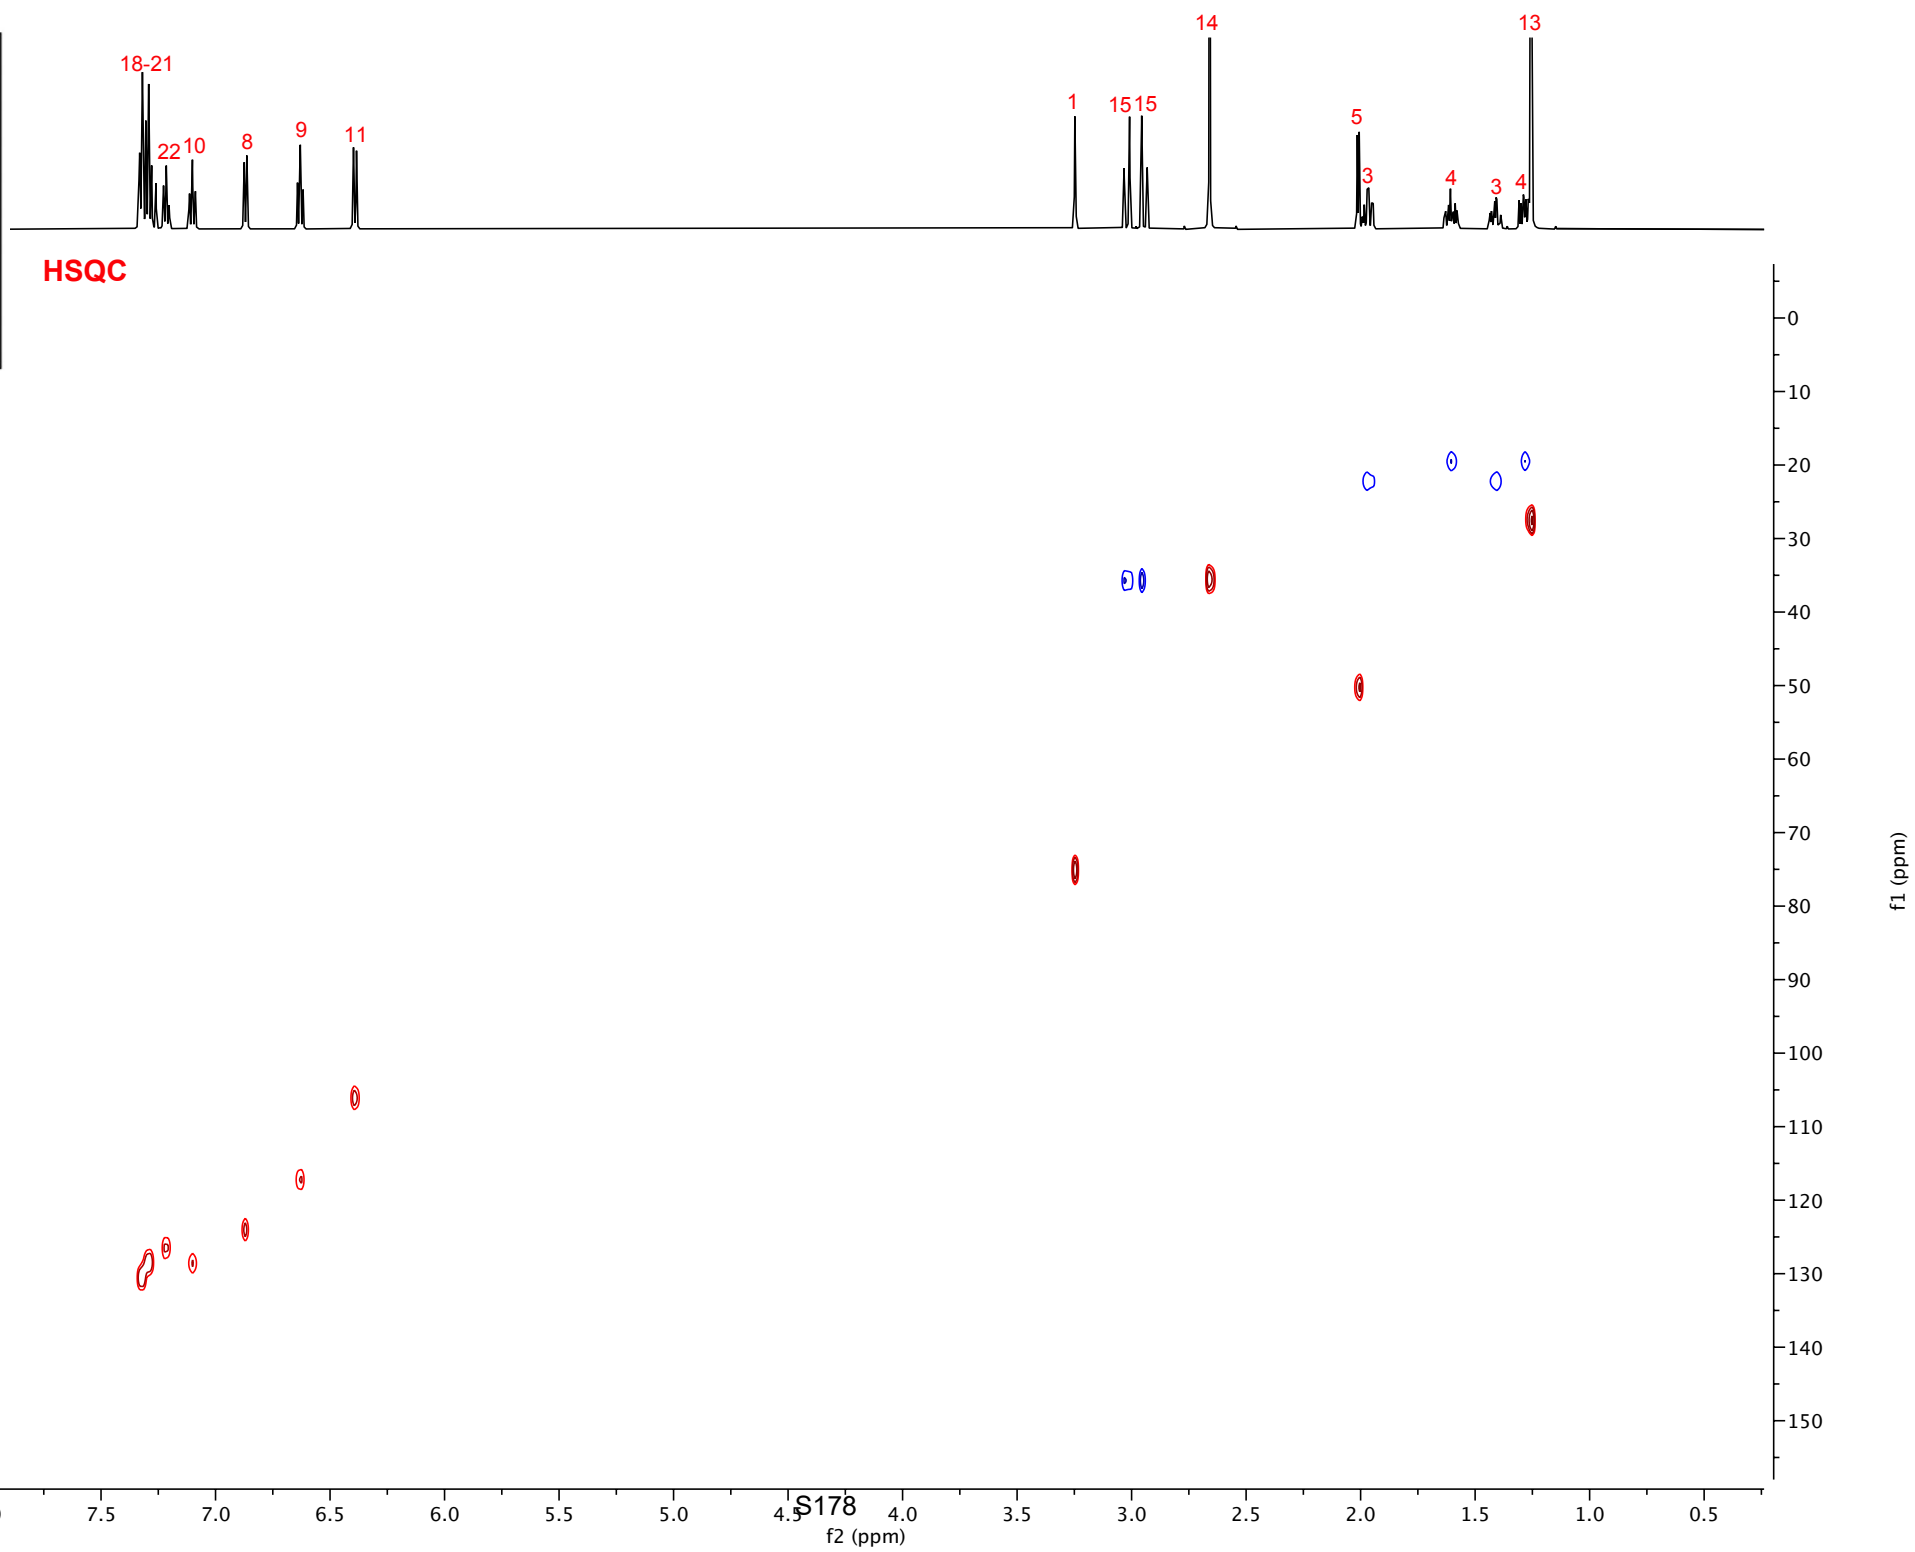

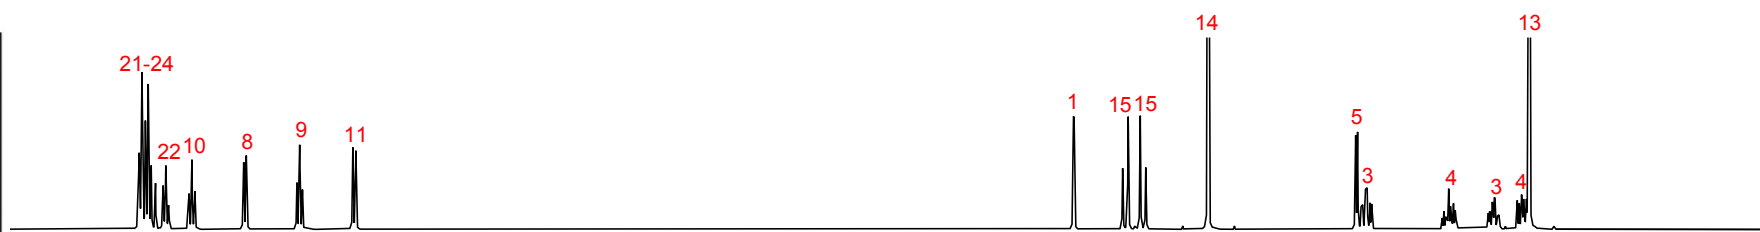

**HMBC**

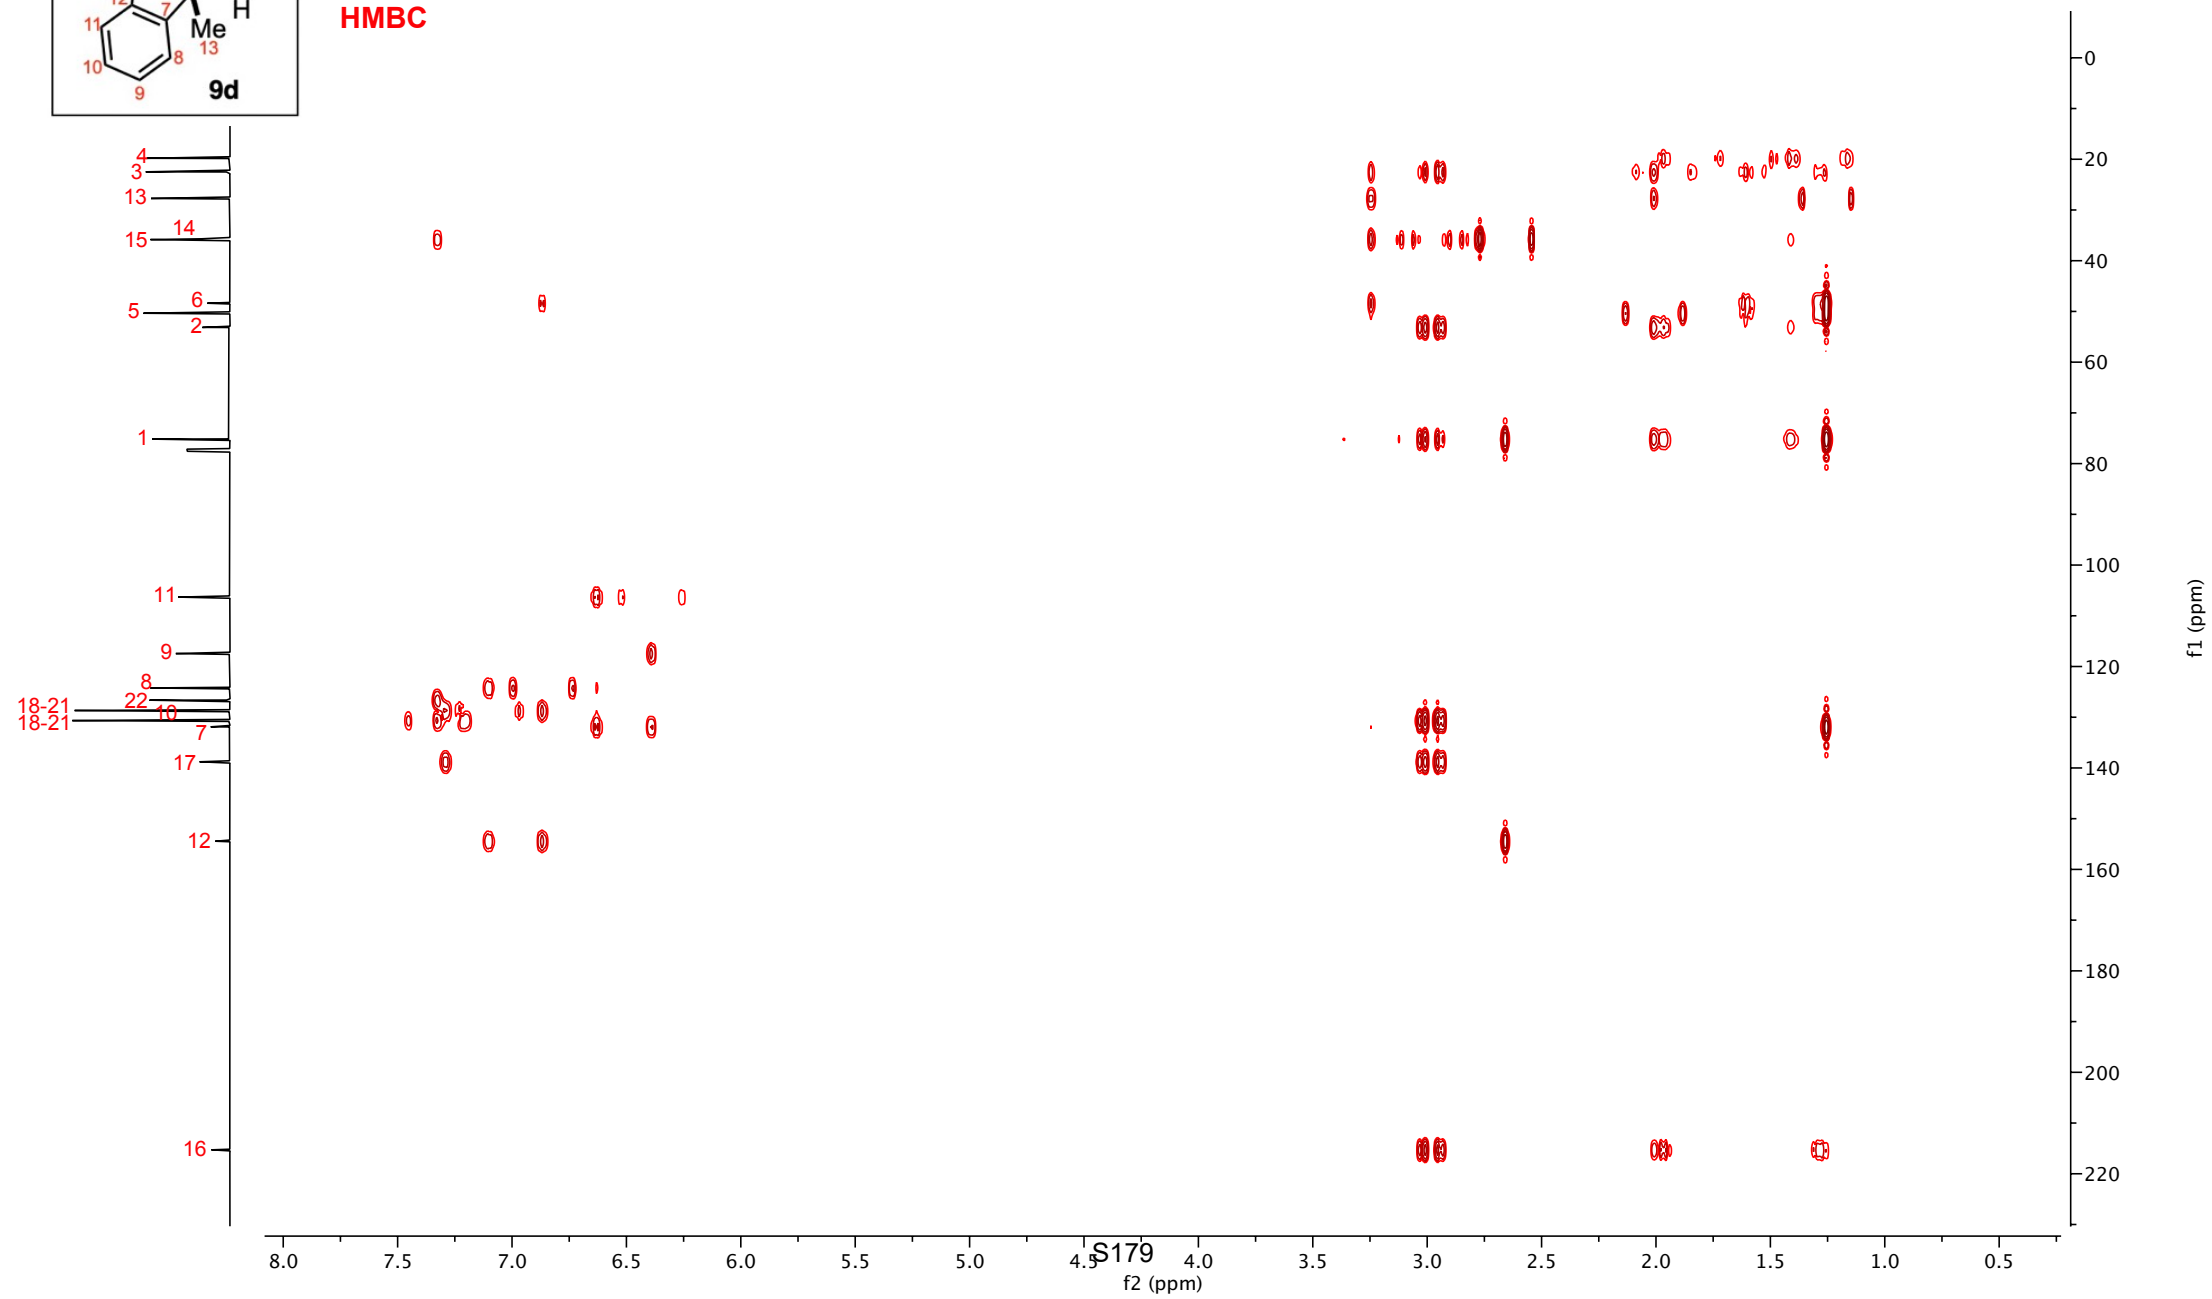

7.31  
7.31  
7.29  
7.29  
7.27  
7.27  
7.21  
7.21  
7.20  
7.20  
7.19  
7.19  
7.18  
7.09  
7.09  
7.08  
7.08  
7.06  
7.06  
6.92  
6.92  
6.91  
6.91  
6.89  
6.89  
6.88  
6.88  
6.67  
6.67  
6.66  
6.66  
6.44  
6.44

3.19  
3.16  
3.16  
2.91  
2.81  
2.78

2.10  
2.10  
1.97  
1.95  
1.94  
1.92  
1.92  
1.73  
1.73  
1.71  
1.70  
1.68  
1.68  
1.67  
1.67  
1.66  
1.66  
1.65  
1.65  
1.64  
1.64  
1.63  
1.63  
1.61  
1.61  
1.55  
1.55  
1.52  
1.52  
1.51  
1.51  
1.50  
1.50  
1.49  
1.49  
1.46  
1.46

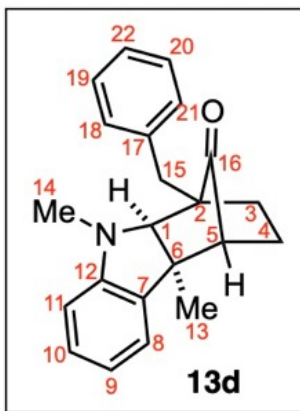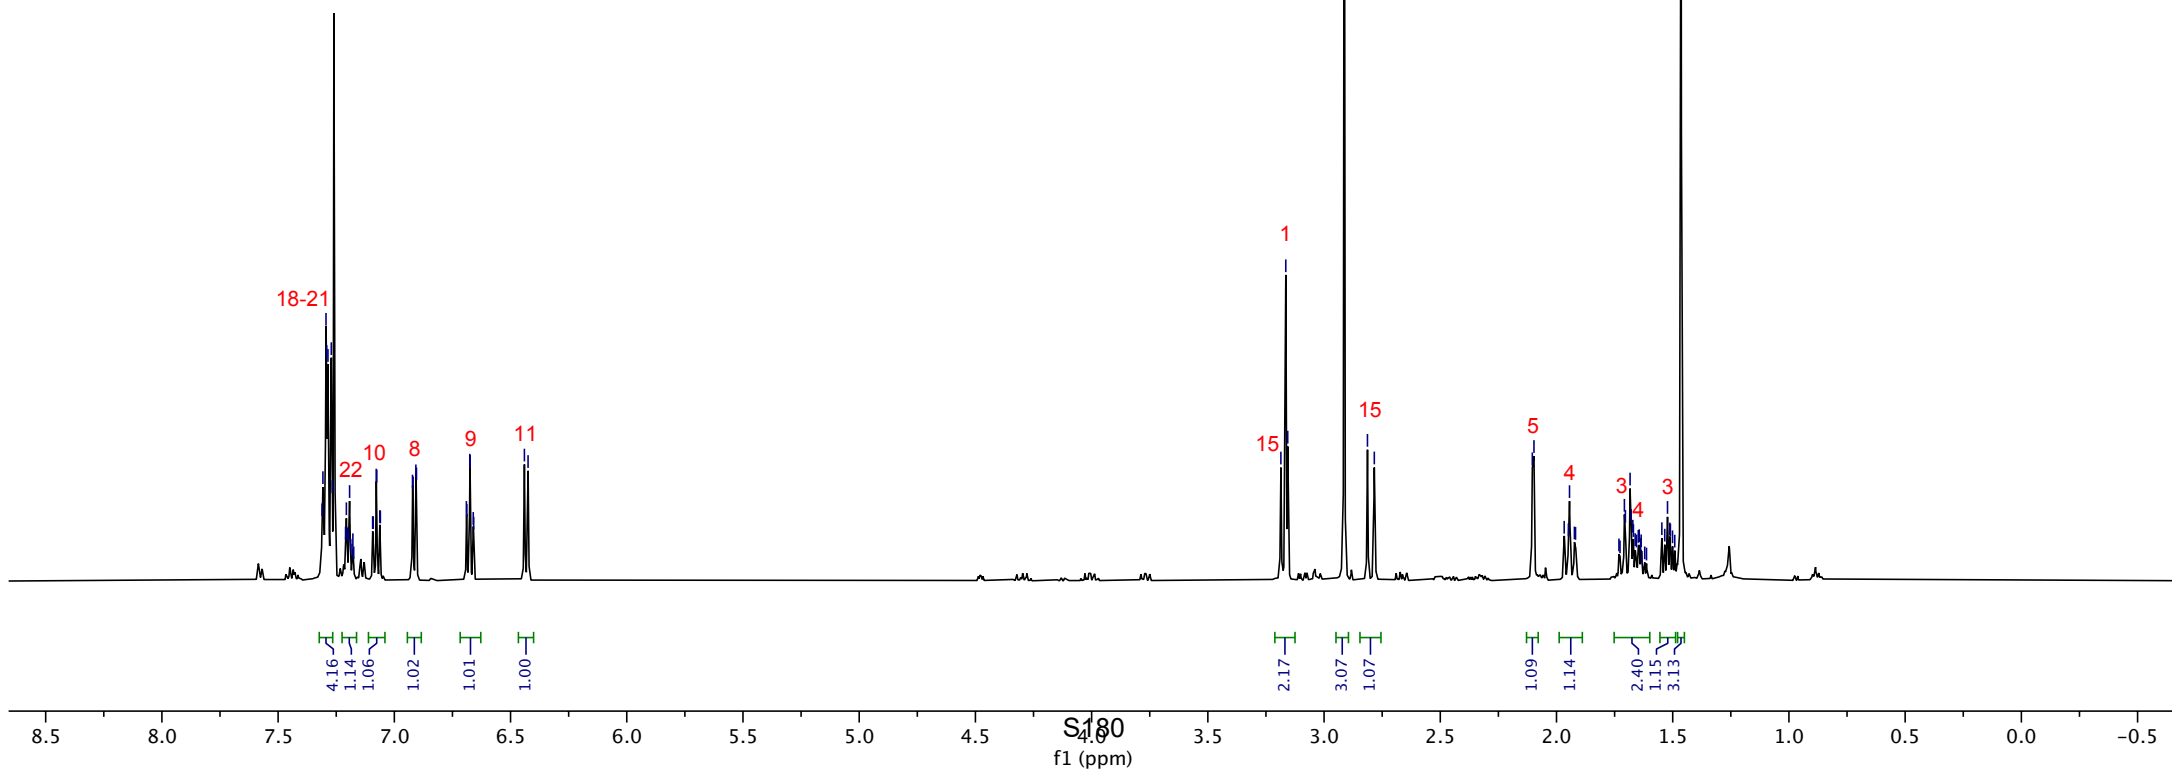

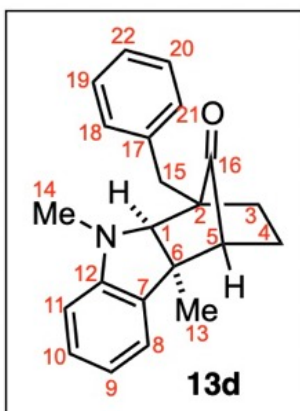

— 214.30

— 152.30

— 139.01

— 135.33

— 130.52

— 128.90

— 128.57

— 126.36

— 123.52

— 118.70

— 108.29

— 80.90

— 53.59

— 50.31

— 48.25

— 38.96

— 32.48

— 25.39

— 24.64

— 18.70

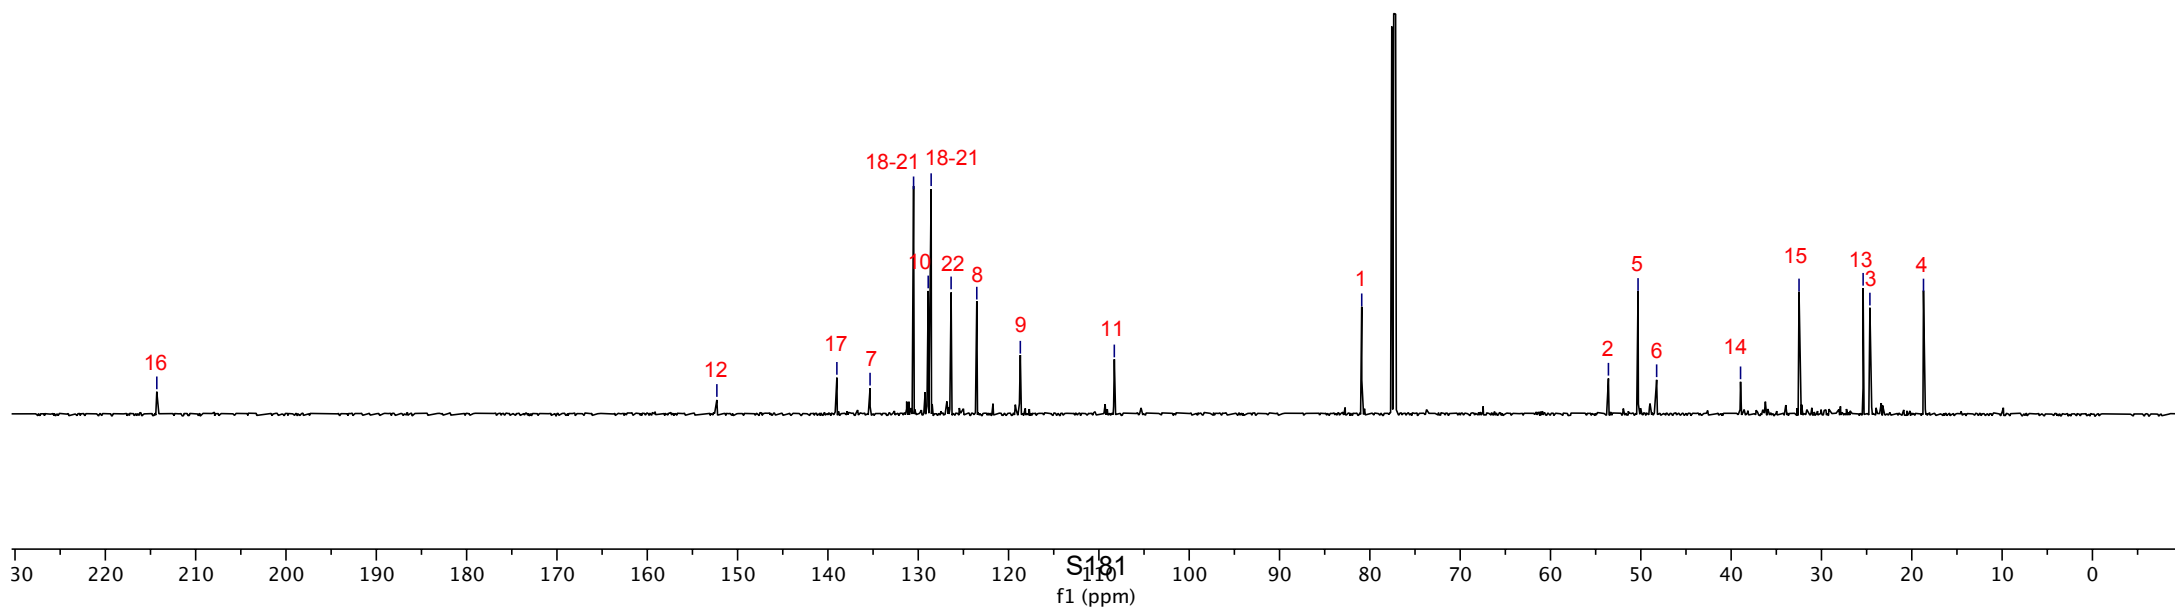

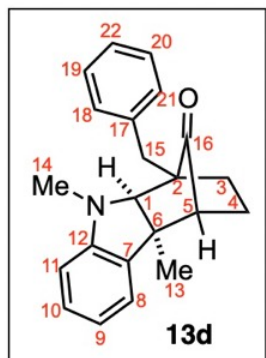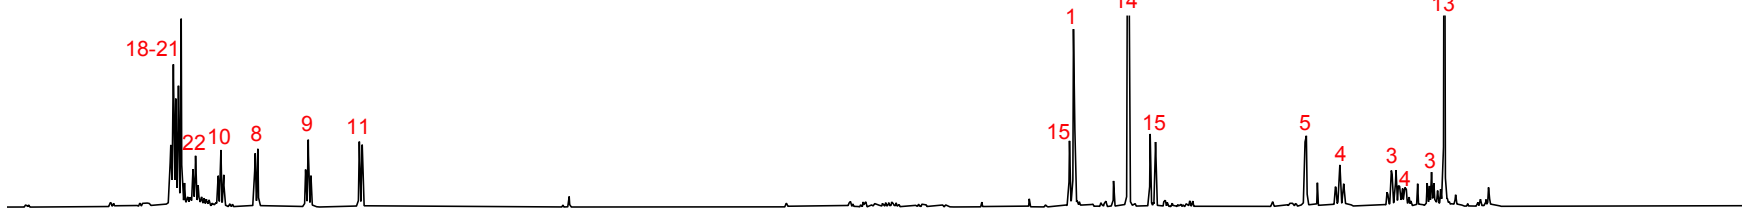

**COSY**

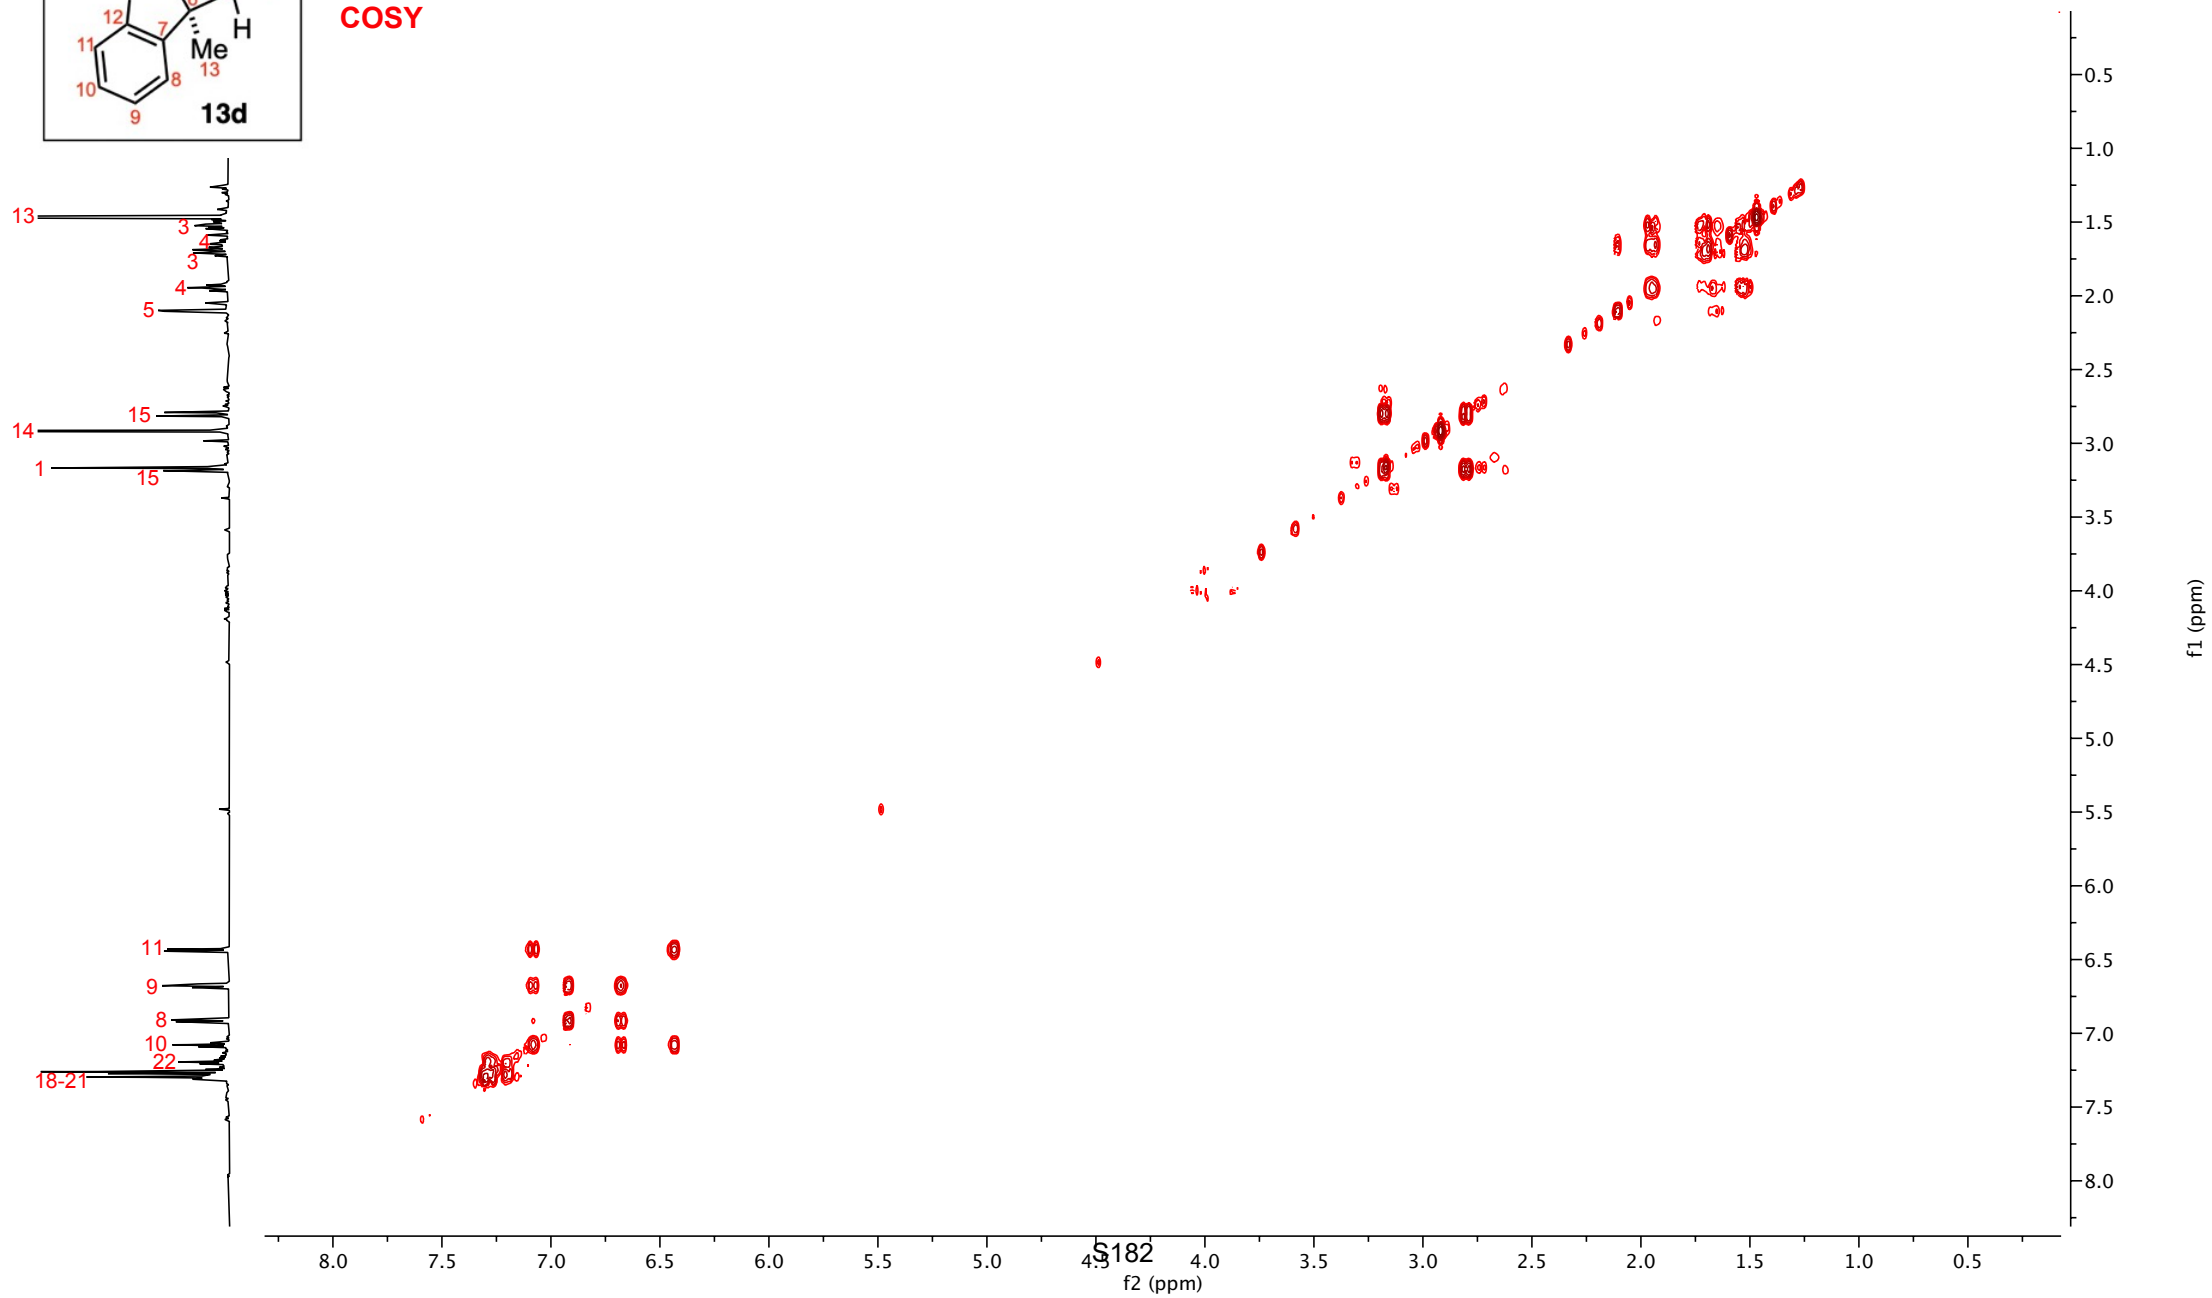

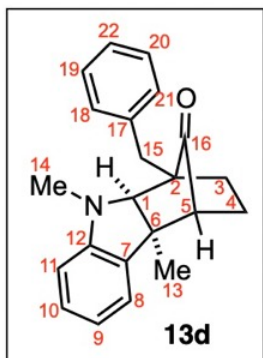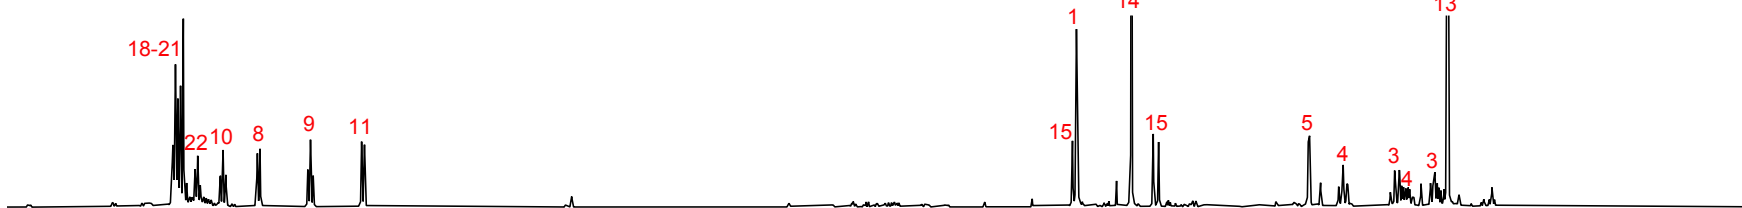

HSQC

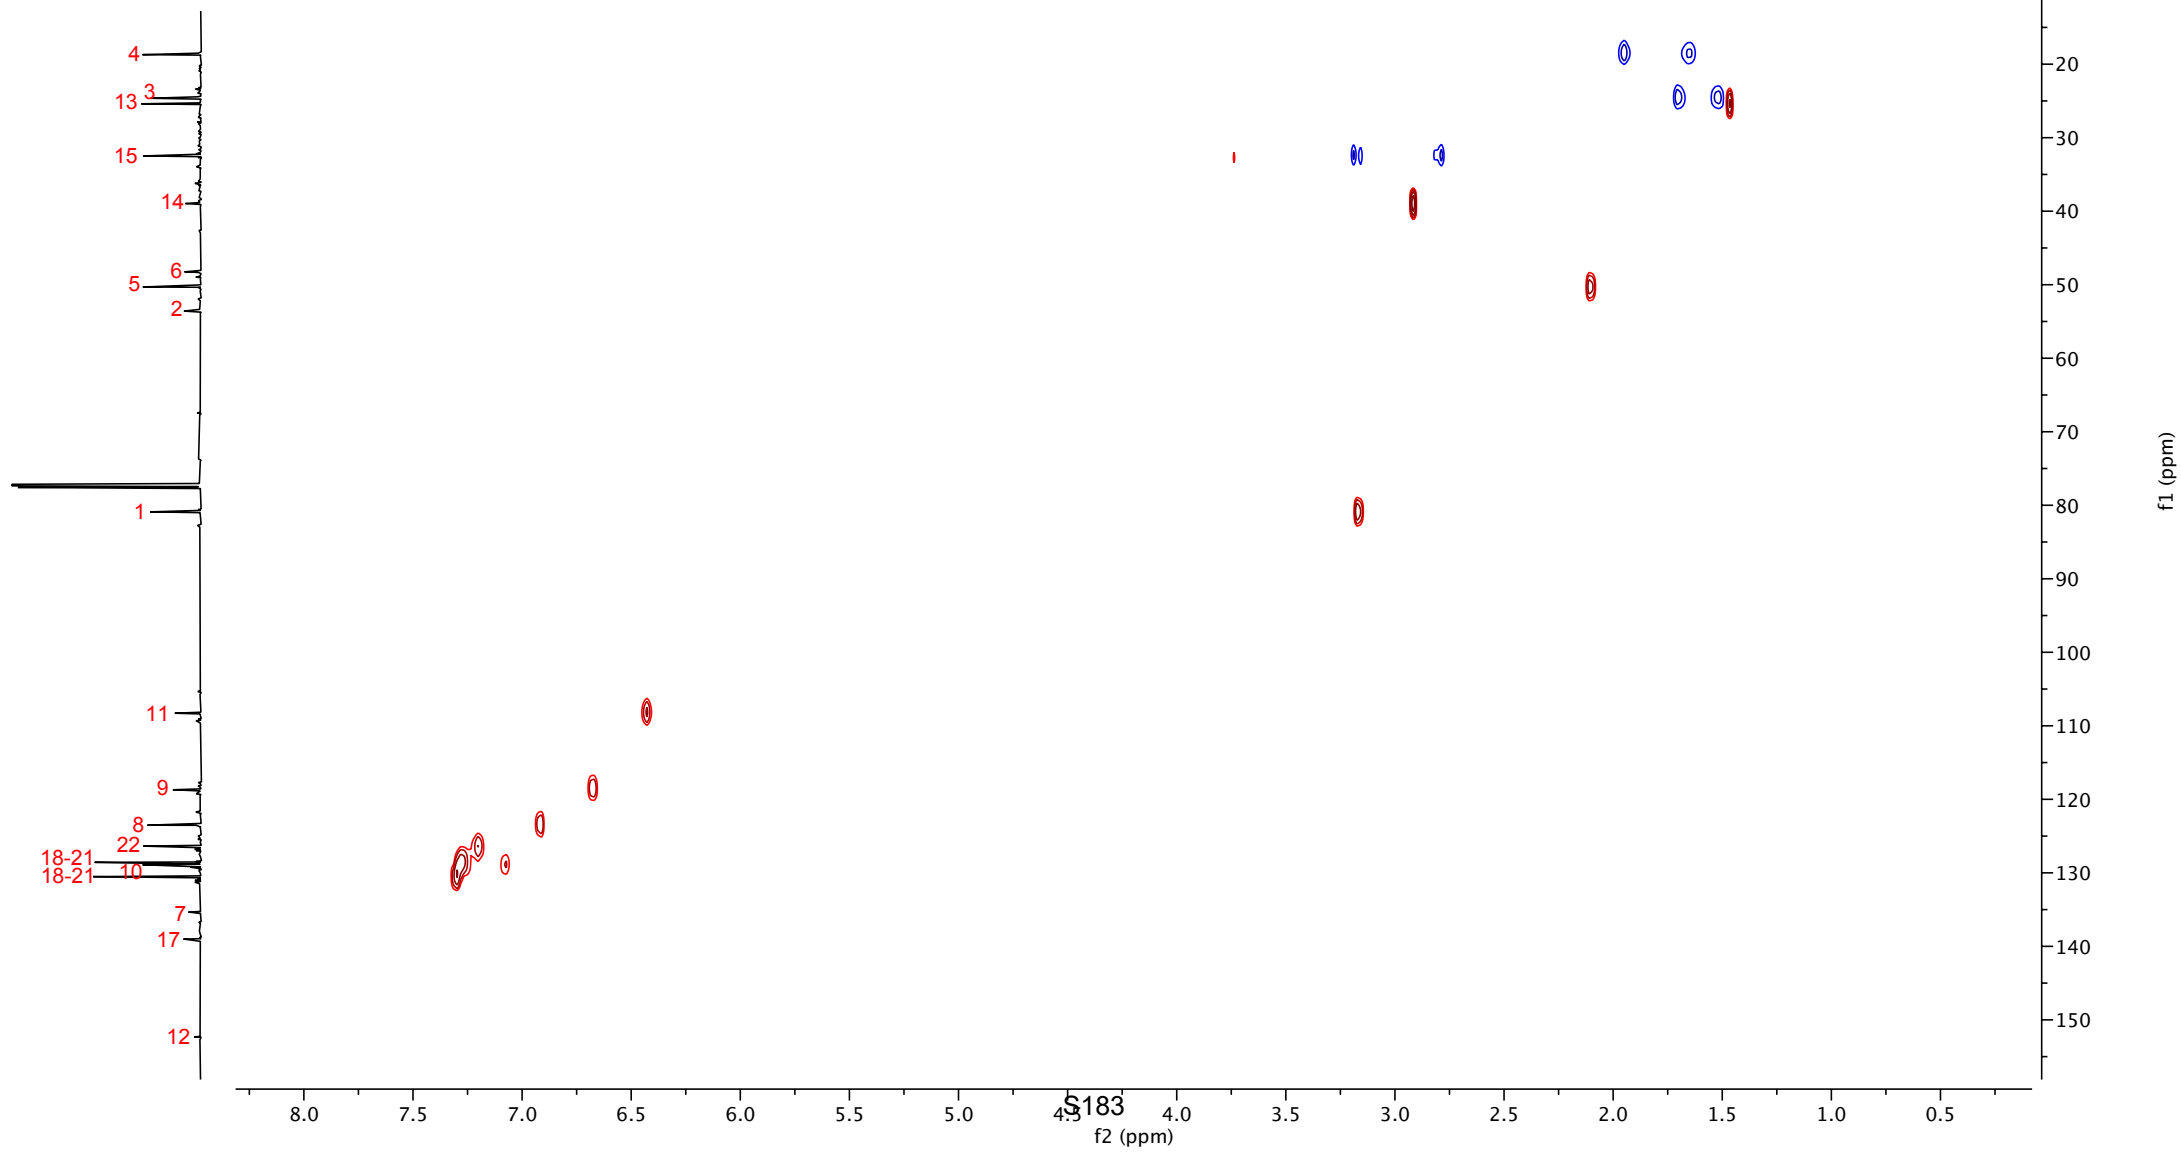



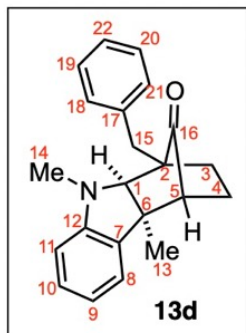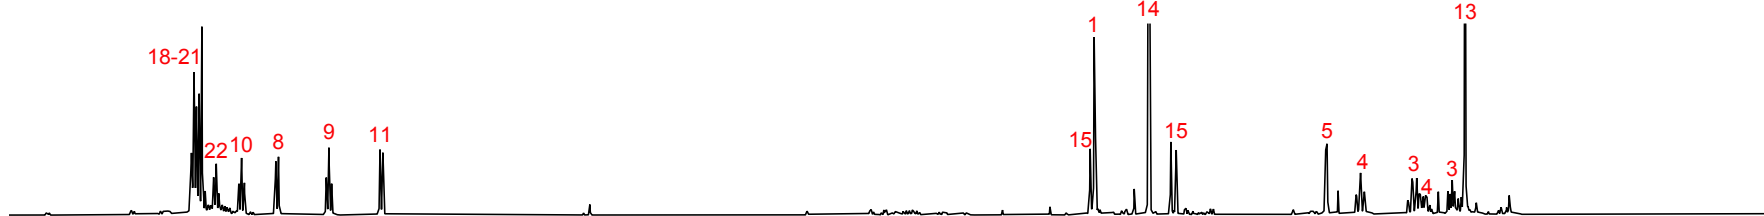

**HMBC**

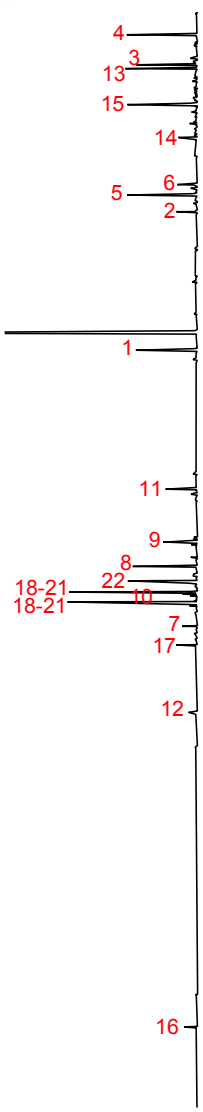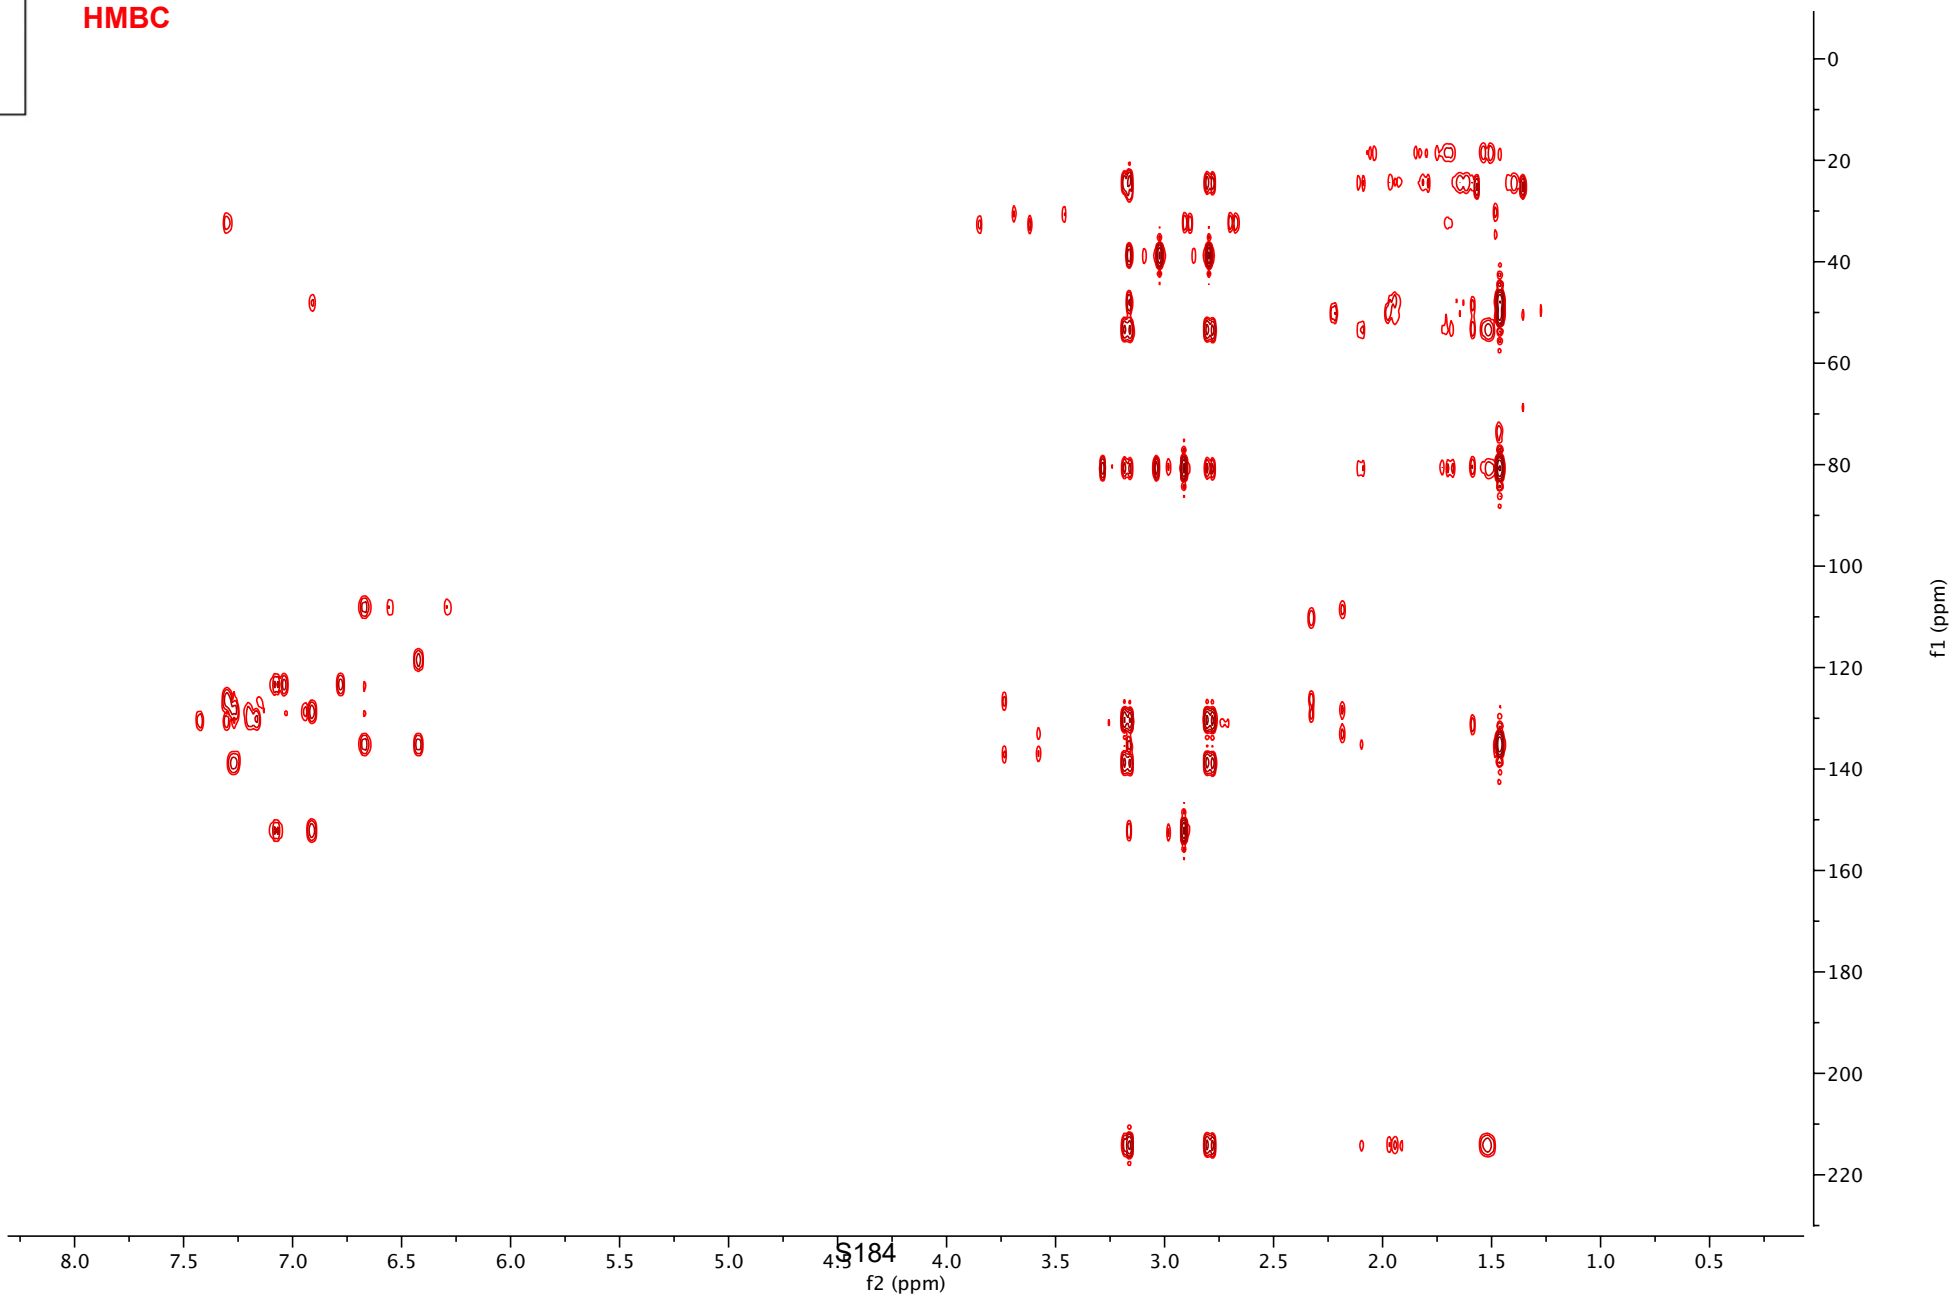

S184  
f2 (ppm)

f1 (ppm)

7.70  
7.70  
7.69  
7.68  
7.68  
7.65  
7.64  
7.64  
7.63  
7.63  
6.87  
6.86  
6.86  
6.85  
6.85  
6.84  
6.84  
6.84  
6.43  
6.43  
6.42  
6.41  
6.40  
6.40  
6.25  
6.23

3.60  
3.57  
3.56  
3.55  
3.54  
3.53  
3.53  
3.52  
3.51  
3.50  
3.49  
3.48  
2.90

2.42  
2.41  
2.39  
2.39  
2.37  
1.99  
1.99  
1.91  
1.90  
1.90  
1.89  
1.89  
1.89  
1.88  
1.87  
1.86  
1.63  
1.63  
1.62  
1.61  
1.61  
1.61  
1.60  
1.60  
1.59  
1.58  
1.57  
1.57  
1.56  
1.56  
1.34  
1.34  
1.34  
1.33  
1.32  
1.31  
1.31  
1.30  
1.30  
1.20

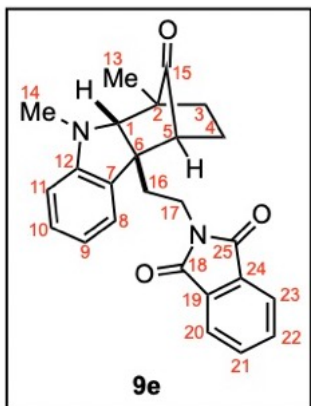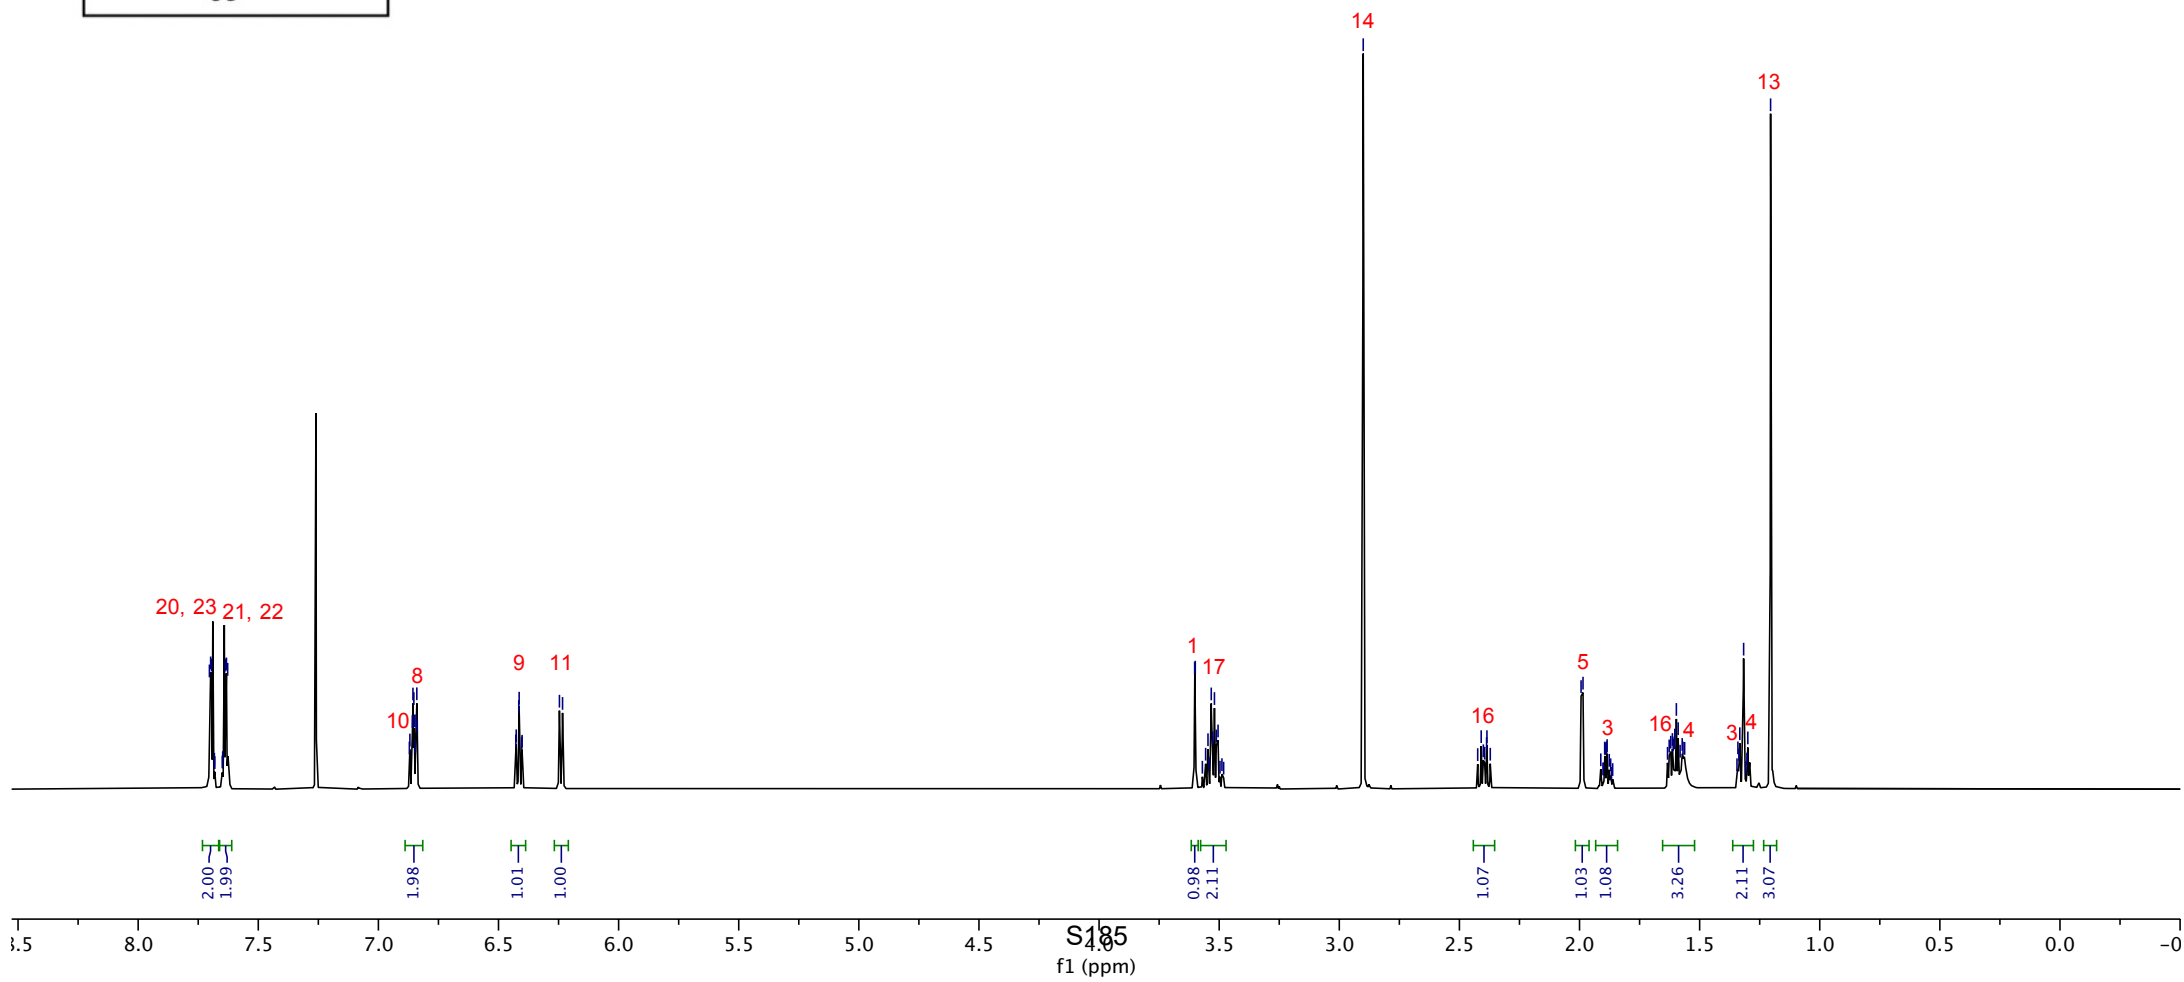



- 215.58
- 168.25
- 154.04
- 133.97
- 132.35
- 128.89
- 128.39
- 124.65
- 123.28
- 117.52
- 105.92
- 105.90
- 73.78
- 51.08
- 50.31
- 47.93
- 36.90
- 34.96
- 34.94
- 33.83
- 23.80
- 19.53
- 15.04

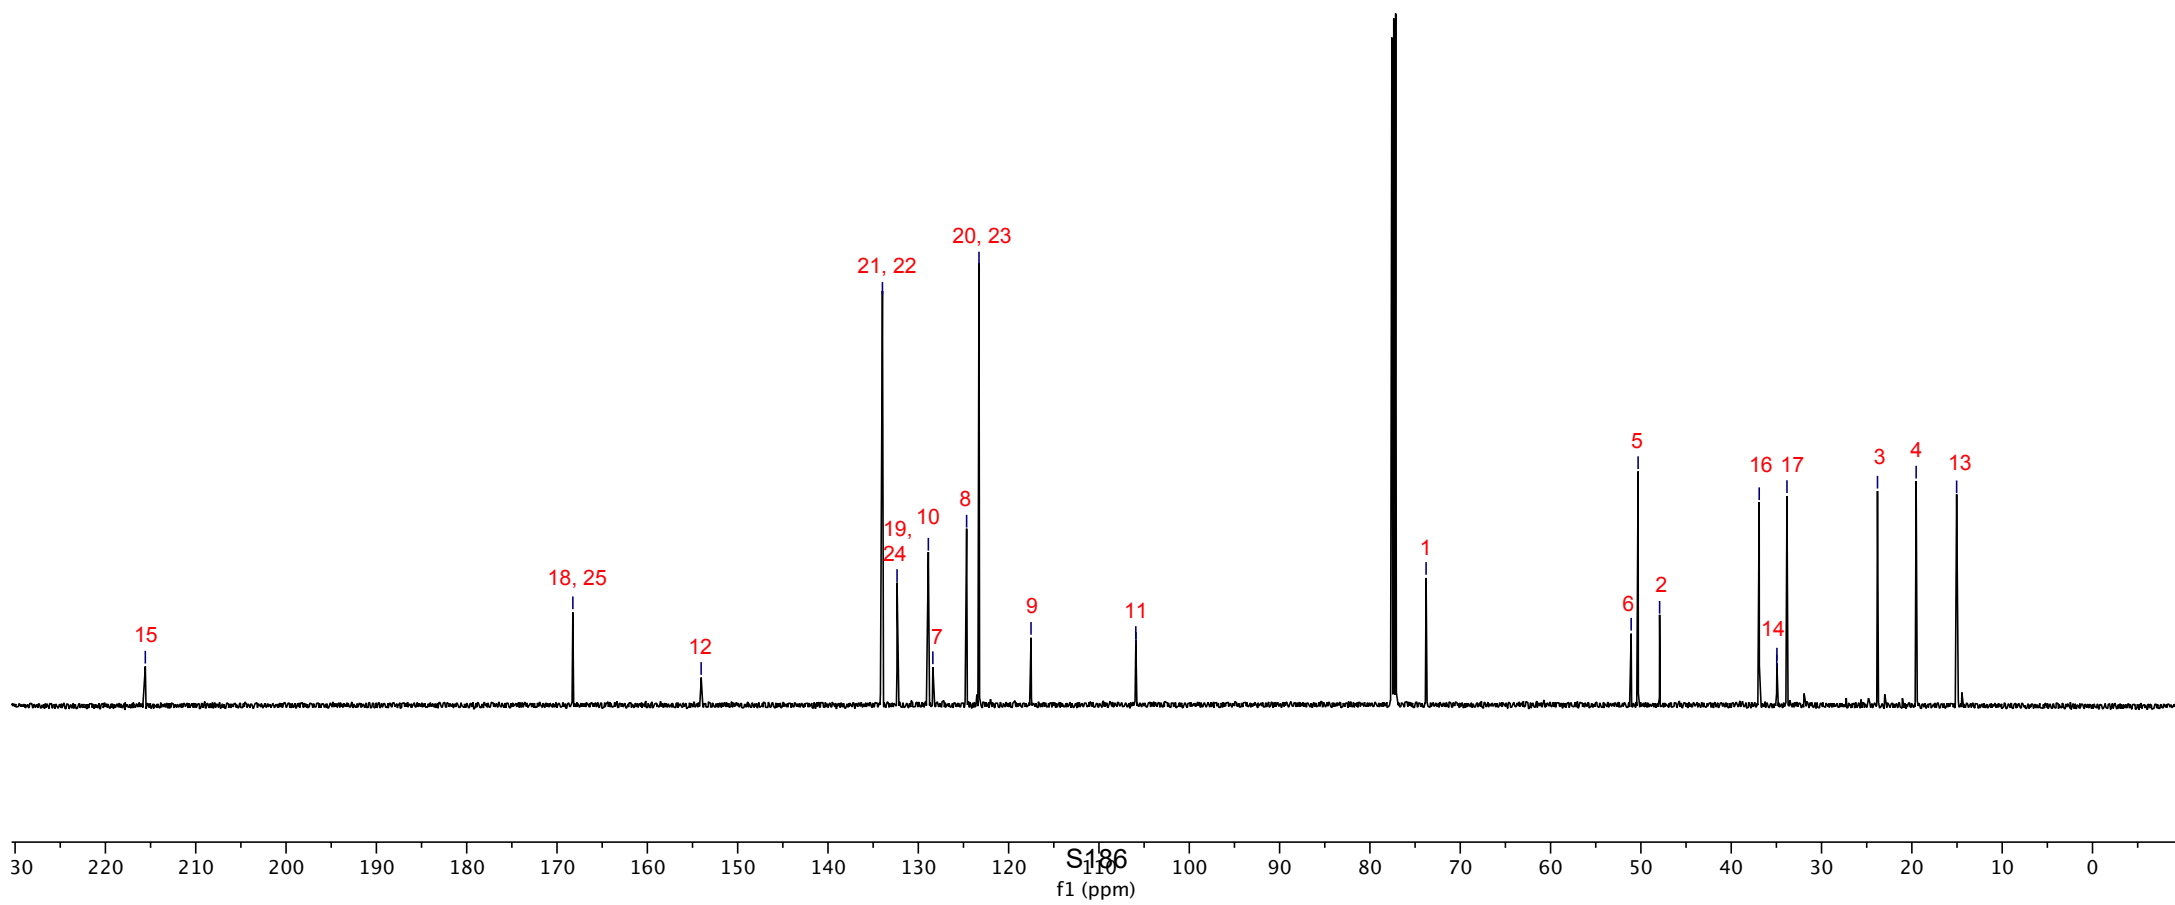

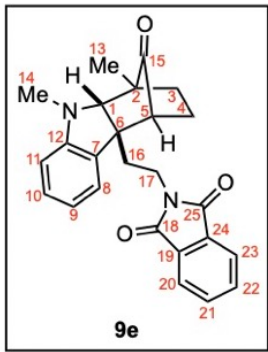

**COSY**

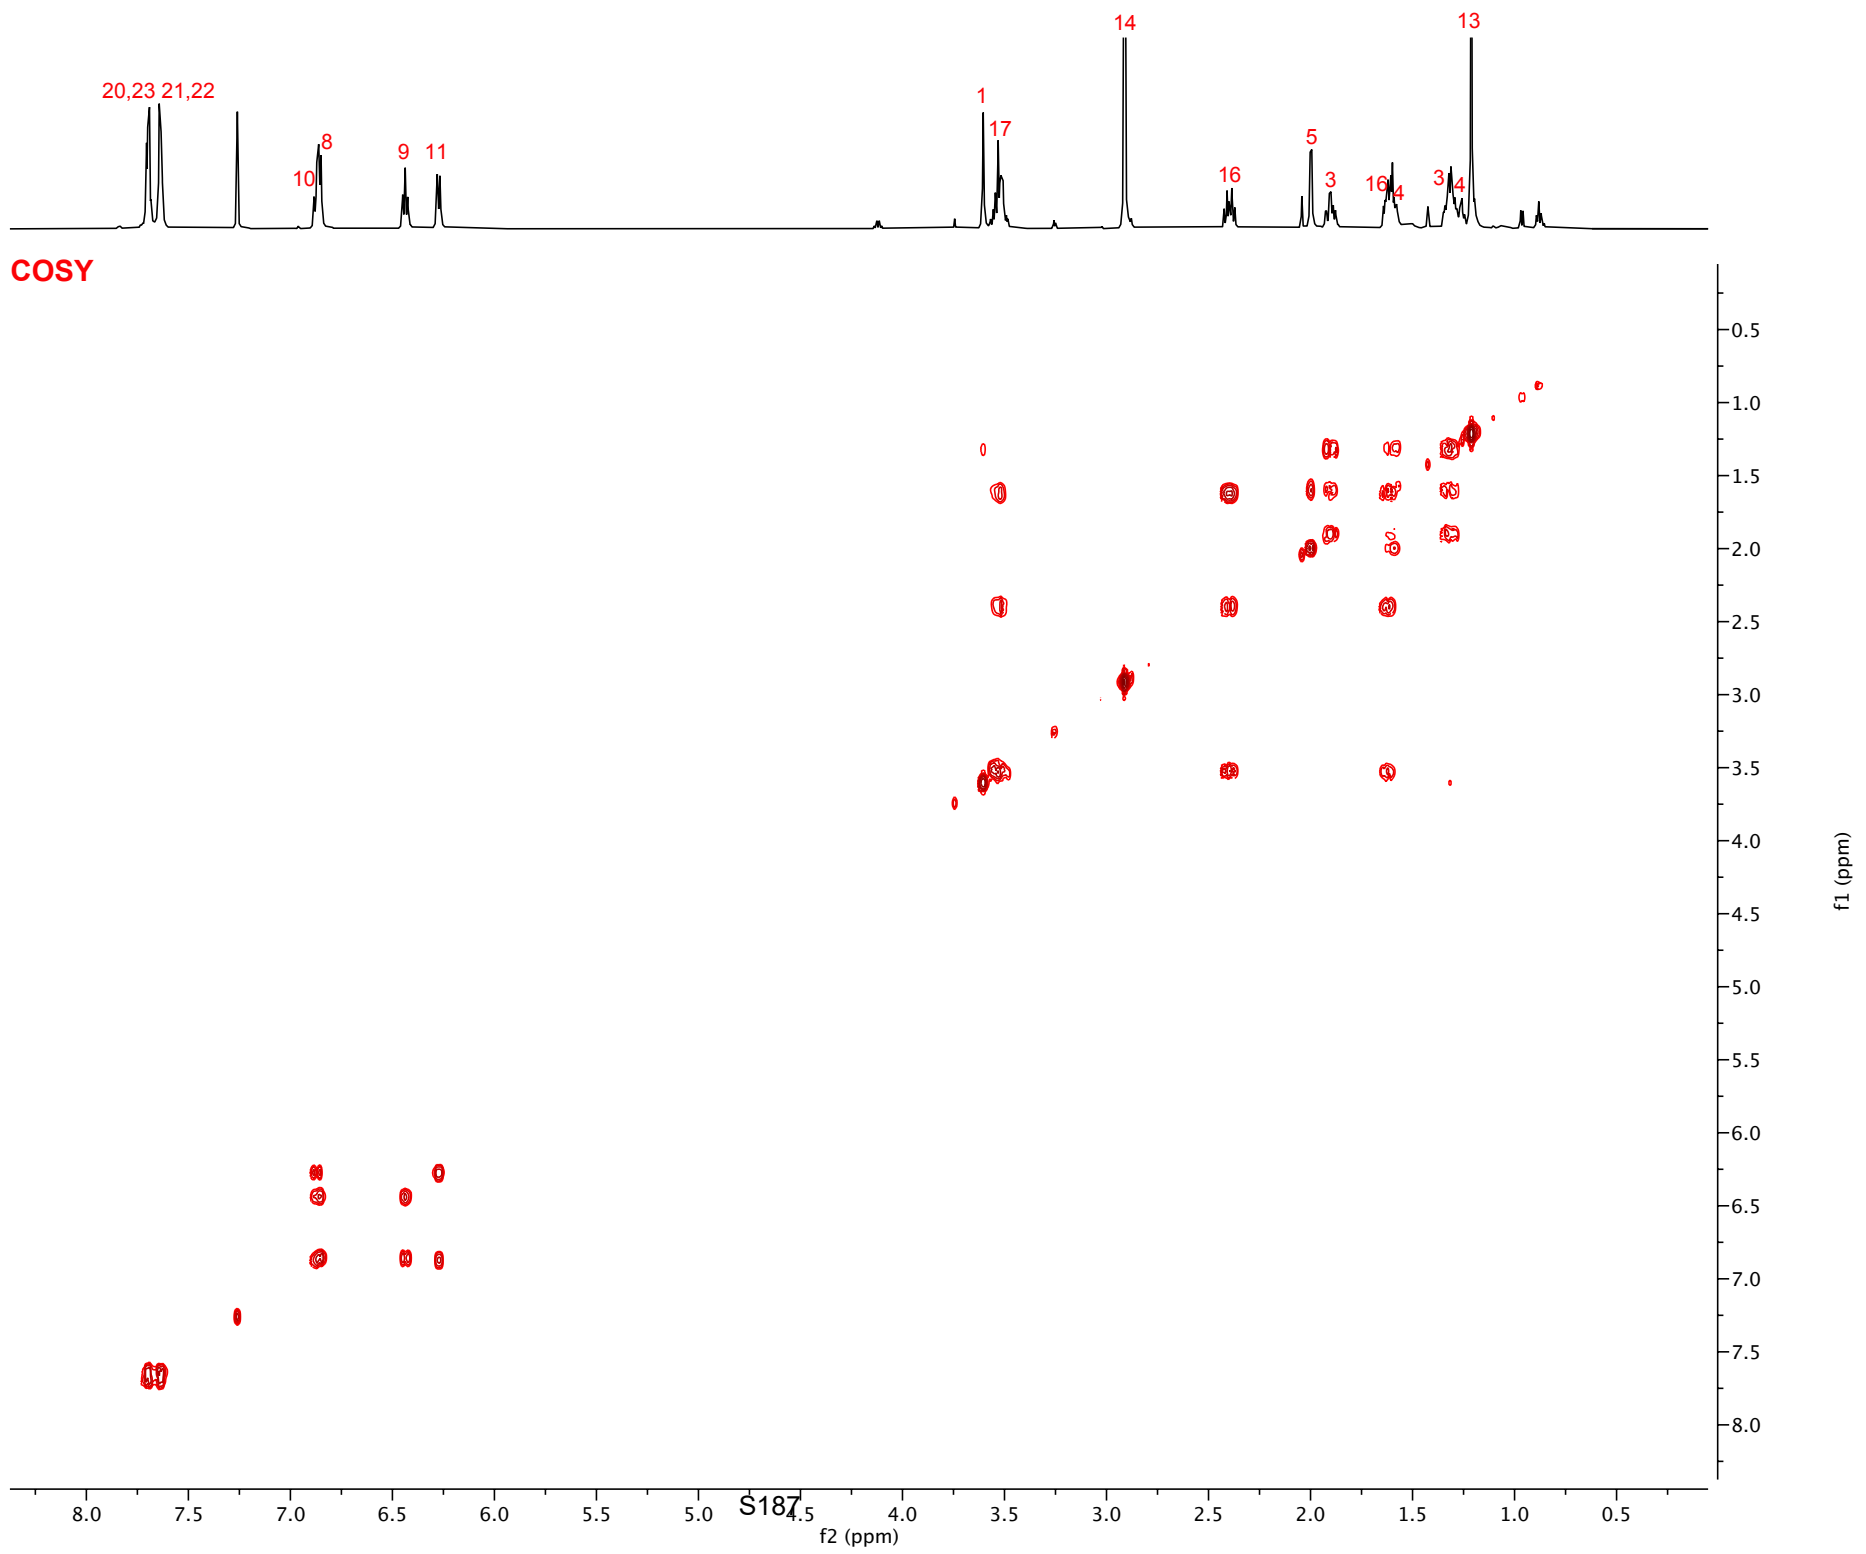

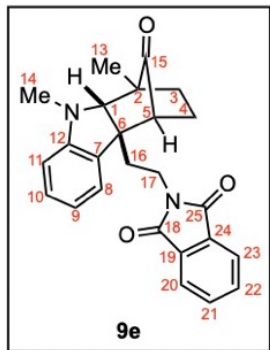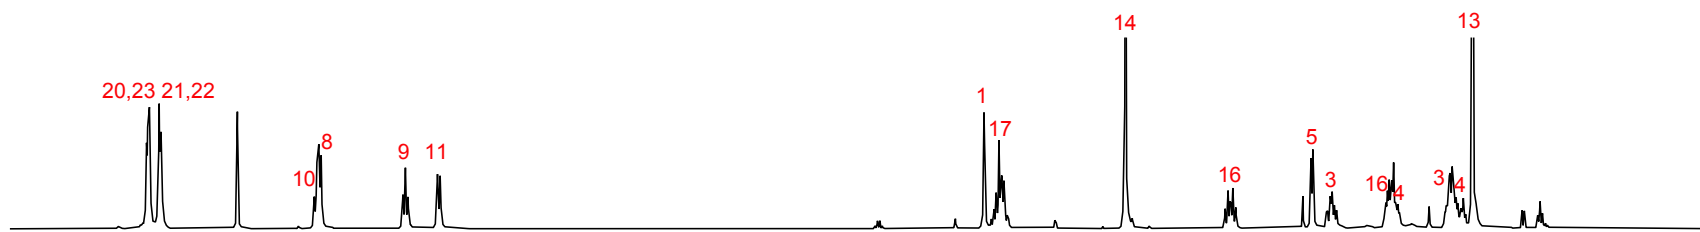

**HSQC**

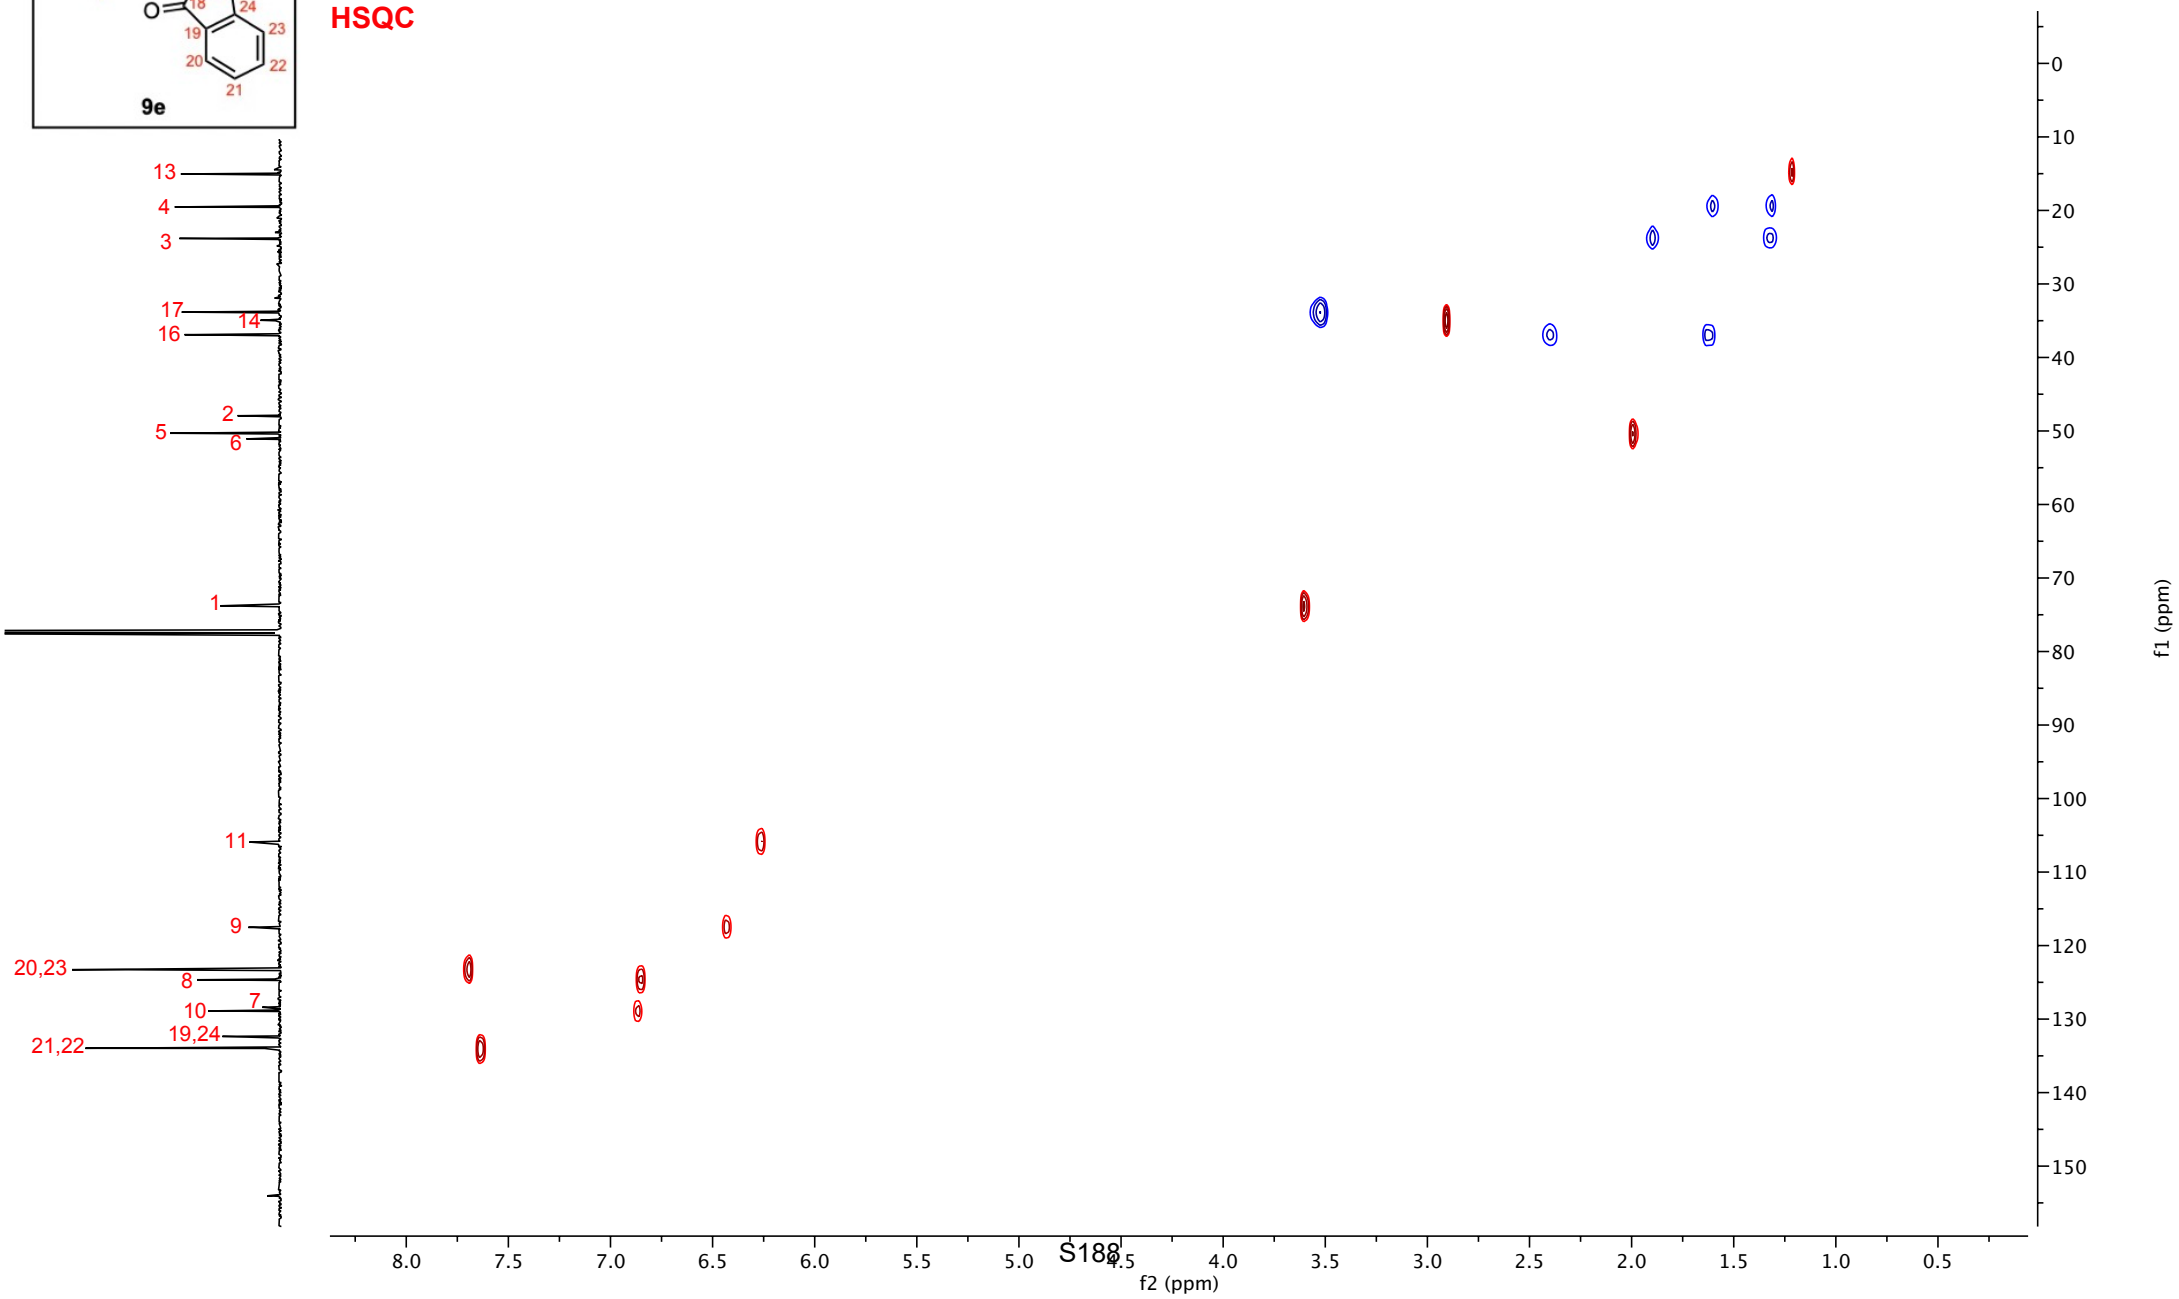

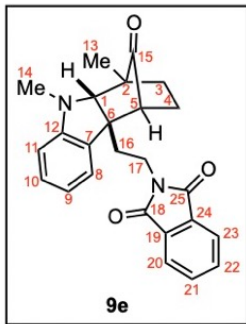

**HMBC**

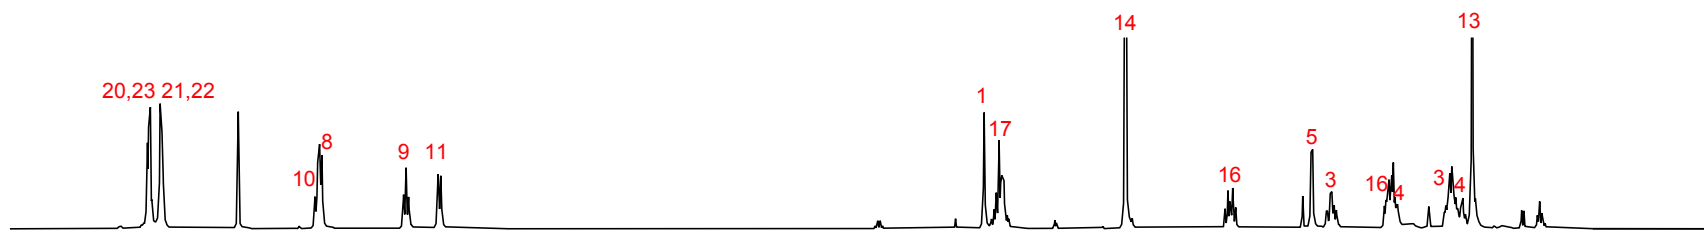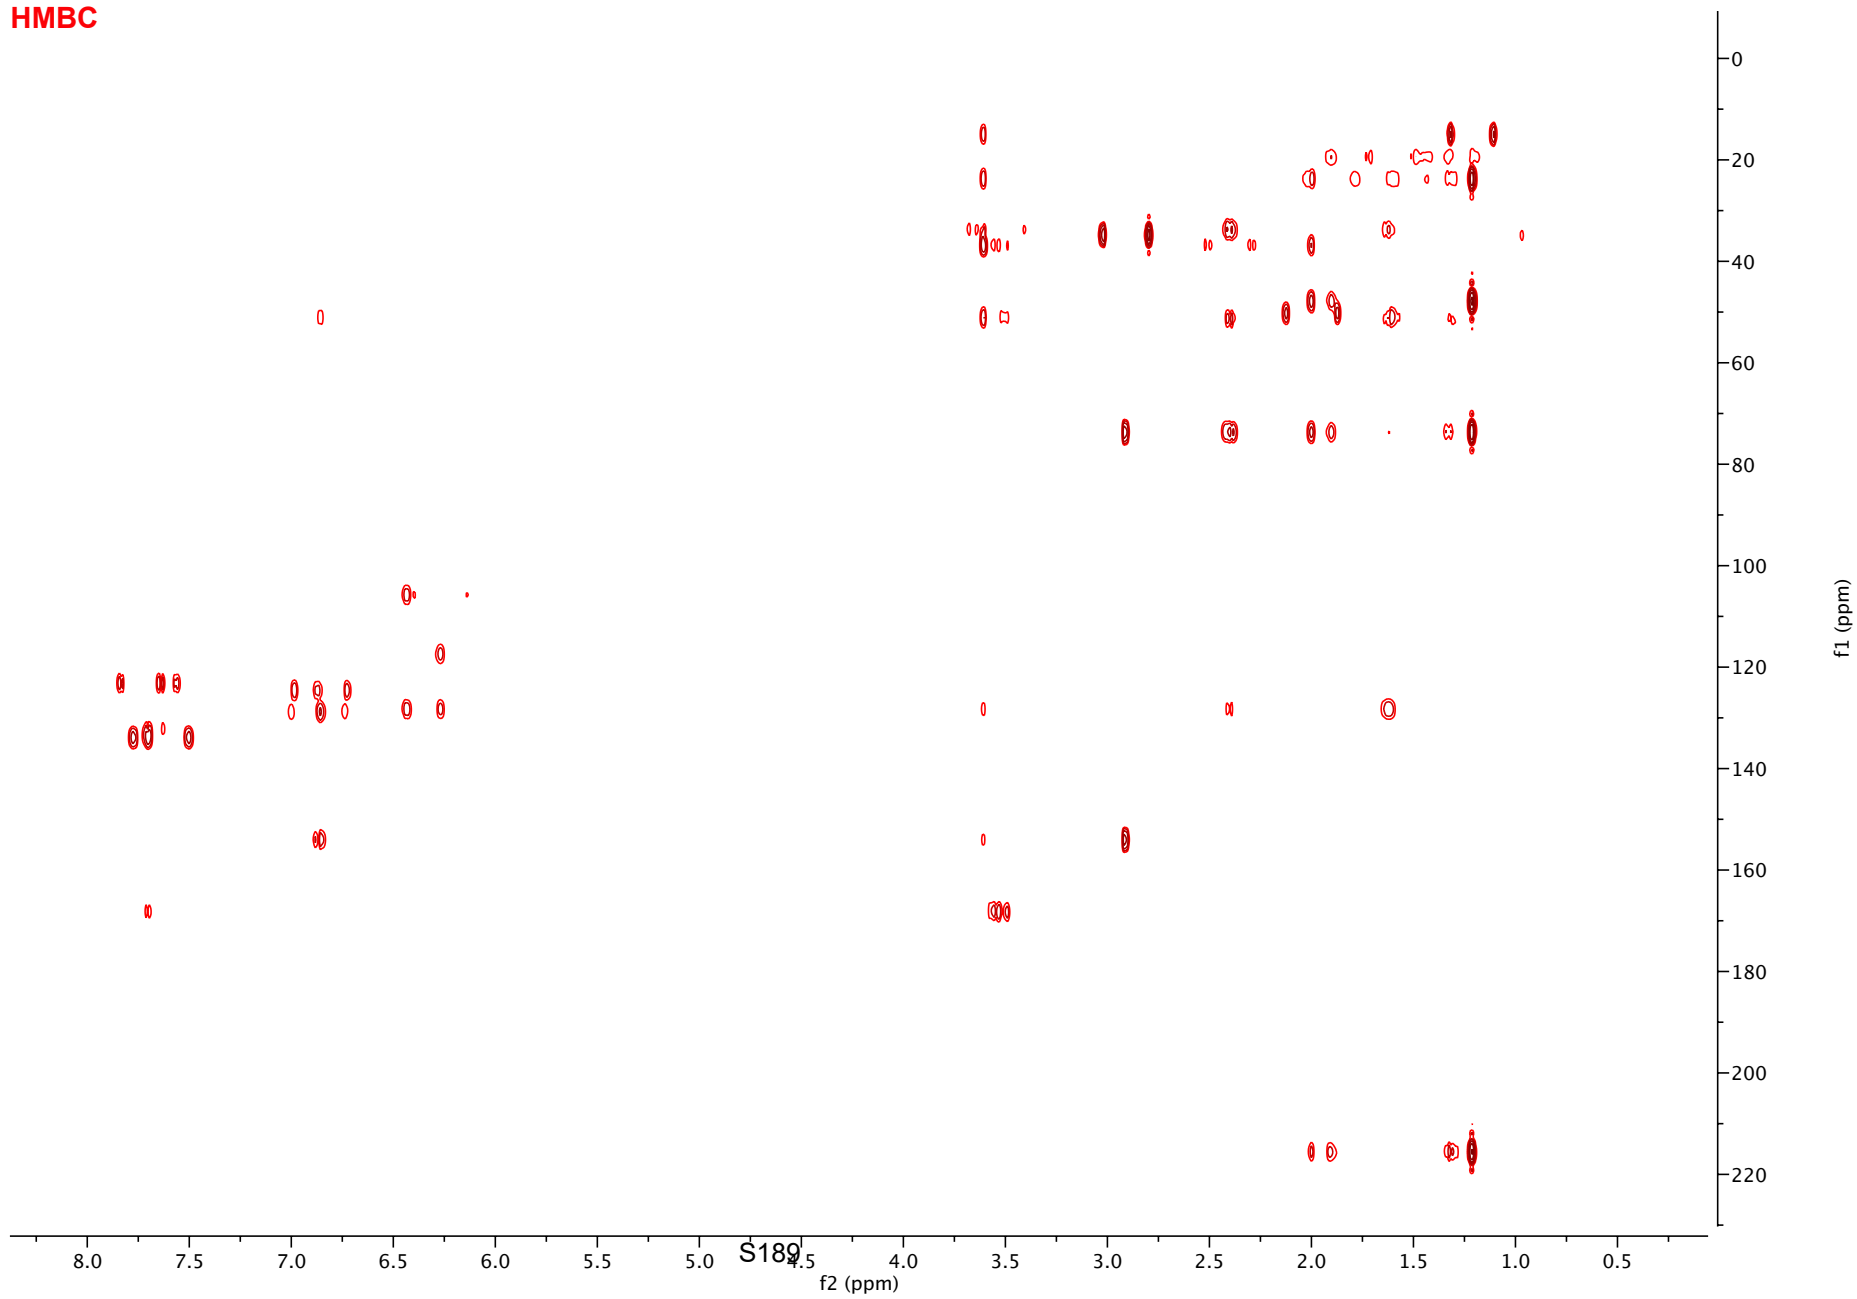

7.80  
7.79  
7.78  
7.78  
7.78  
7.71  
7.70  
7.70  
7.69  
7.69  
7.68  
7.00  
6.99  
6.99  
6.98  
6.98  
6.61  
6.60  
6.60  
6.59  
6.59  
6.30  
6.30  
6.29  
6.28

3.59  
3.57  
3.57  
3.56  
3.55  
3.54  
3.45  
3.44  
3.43  
3.43  
3.42  
3.42  
3.41  
3.40  
3.29  
2.90

2.29  
2.28  
2.27  
2.26  
2.26  
2.25  
2.24  
2.19  
2.18  
2.04  
2.03  
2.02  
2.01  
2.01  
2.00  
1.99  
1.98  
1.98  
1.97  
1.80  
1.80  
1.79  
1.78  
1.78  
1.77  
1.77  
1.77  
1.76  
1.75  
1.75  
1.74  
1.69  
1.68  
1.68  
1.67  
1.66  
1.66

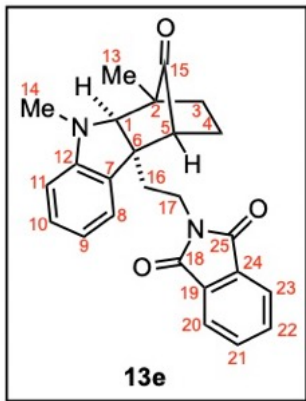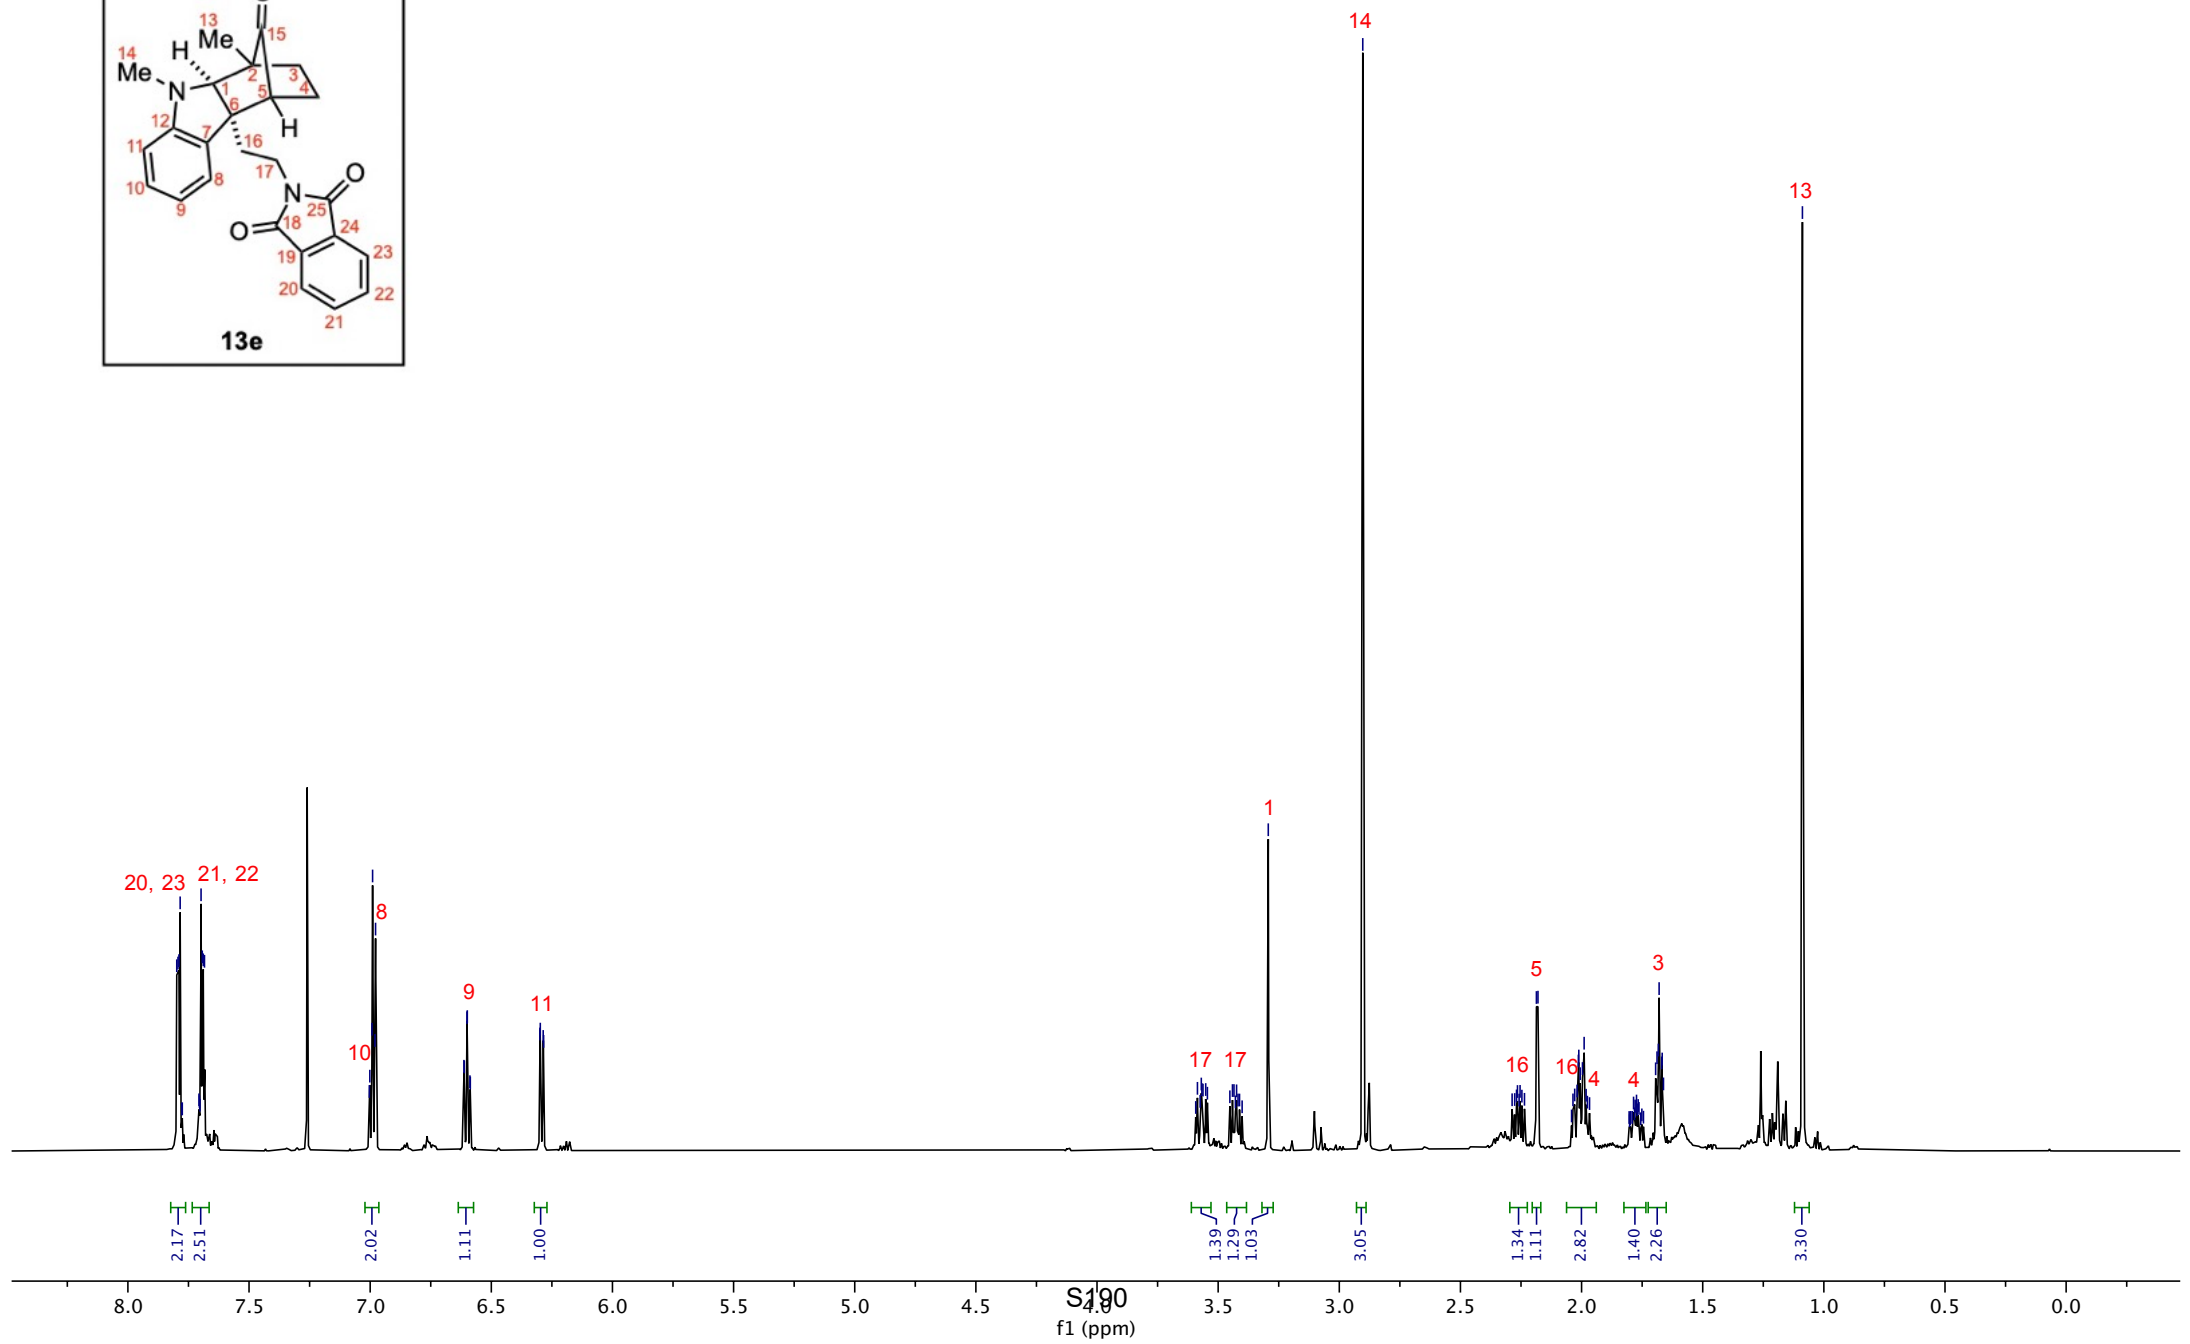

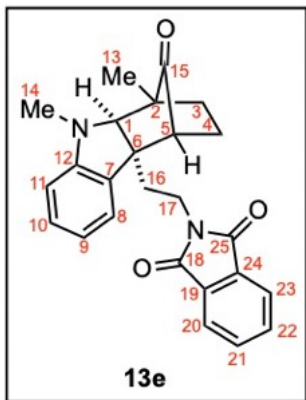

— 214.68

— 168.41

— 152.26

134.25

132.42

130.80

129.32

124.25

123.50

123.47

123.27

118.37

— 107.36

— 78.06

50.58

49.85

48.95

36.97

35.12

34.27

— 28.26

— 18.26

— 11.85

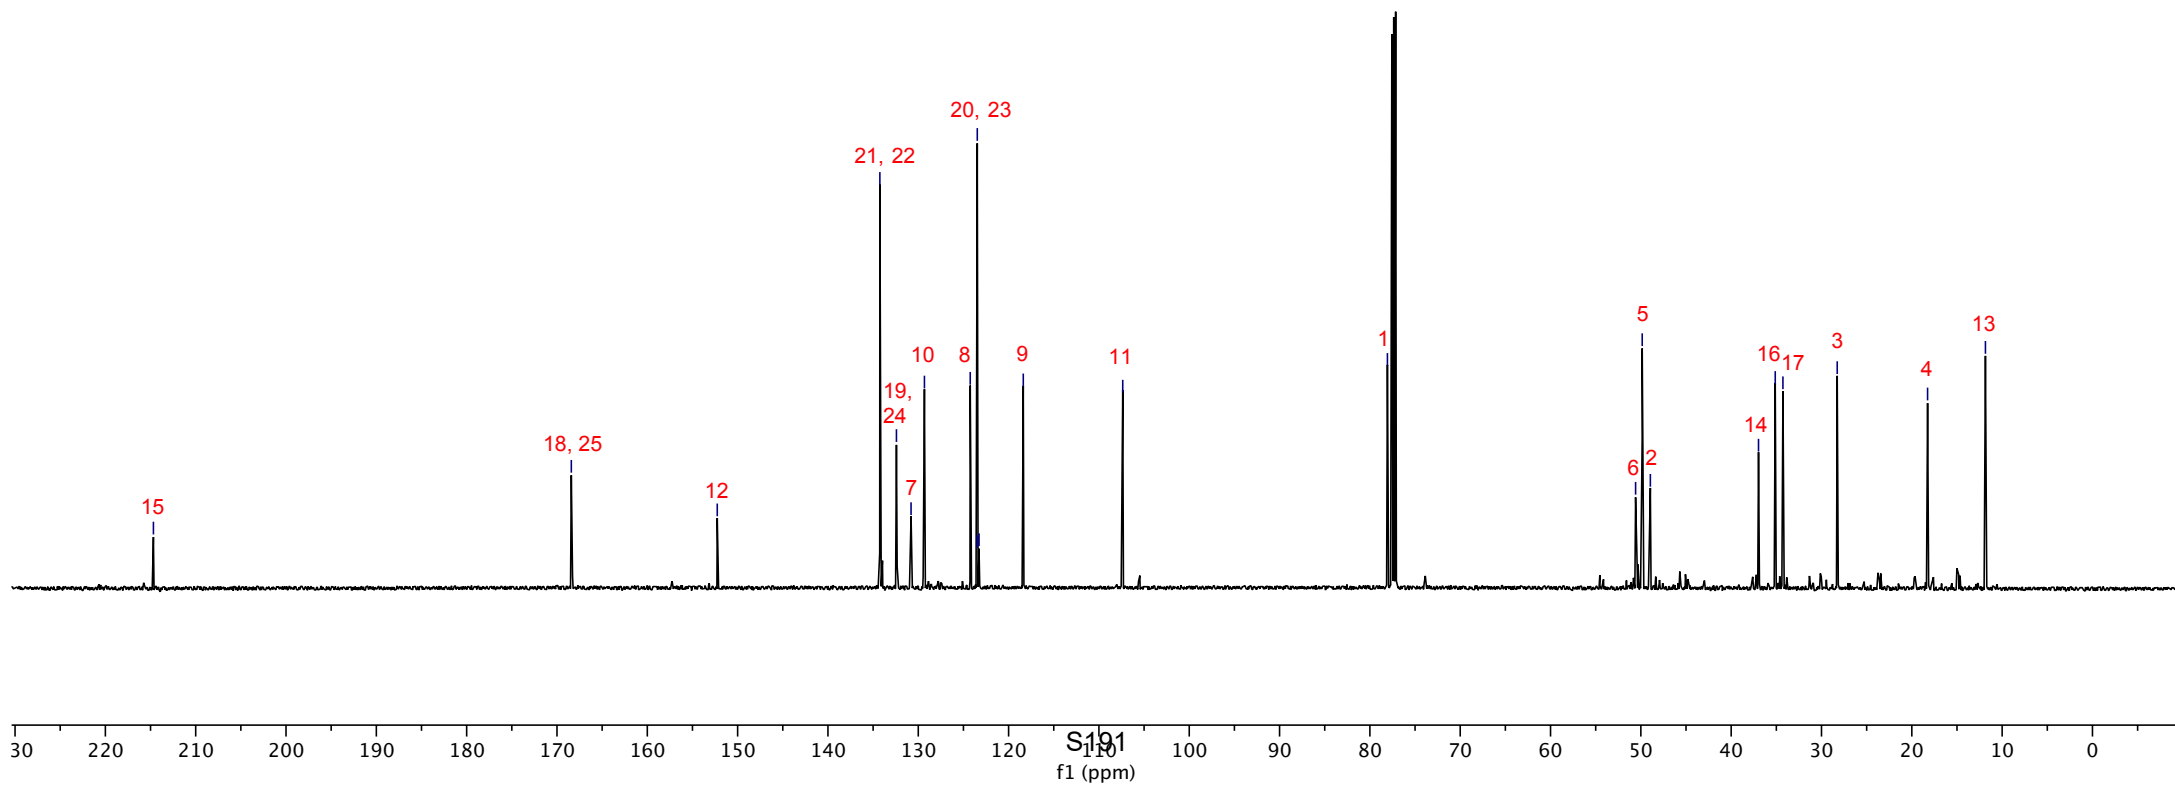



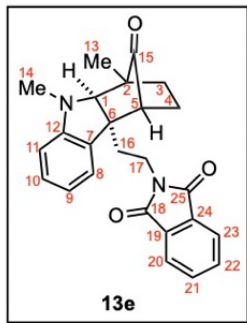

20, 23 21, 22

**COSY**

8.0  
7.5  
7.0  
6.5  
6.0  
5.5  
5.0  
4.5  
4.0  
3.5  
3.0  
2.5  
2.0  
1.5  
1.0  
0.5

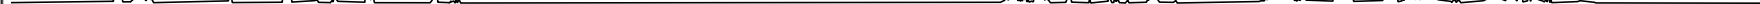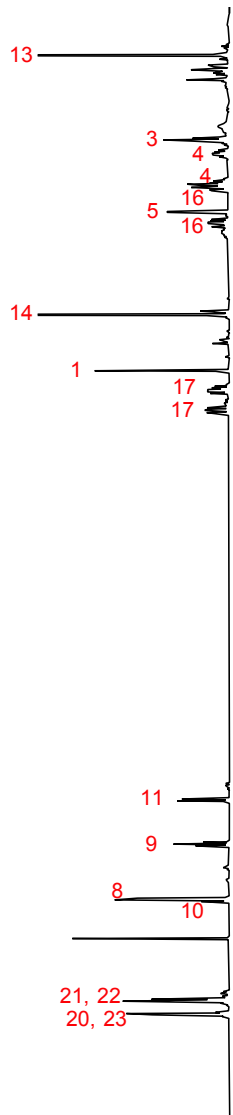

f1 (ppm)

8.0  
7.5  
7.0  
6.5  
6.0  
5.5  
5.0  
4.5  
4.0  
3.5  
3.0  
2.5  
2.0  
1.5  
1.0  
0.5

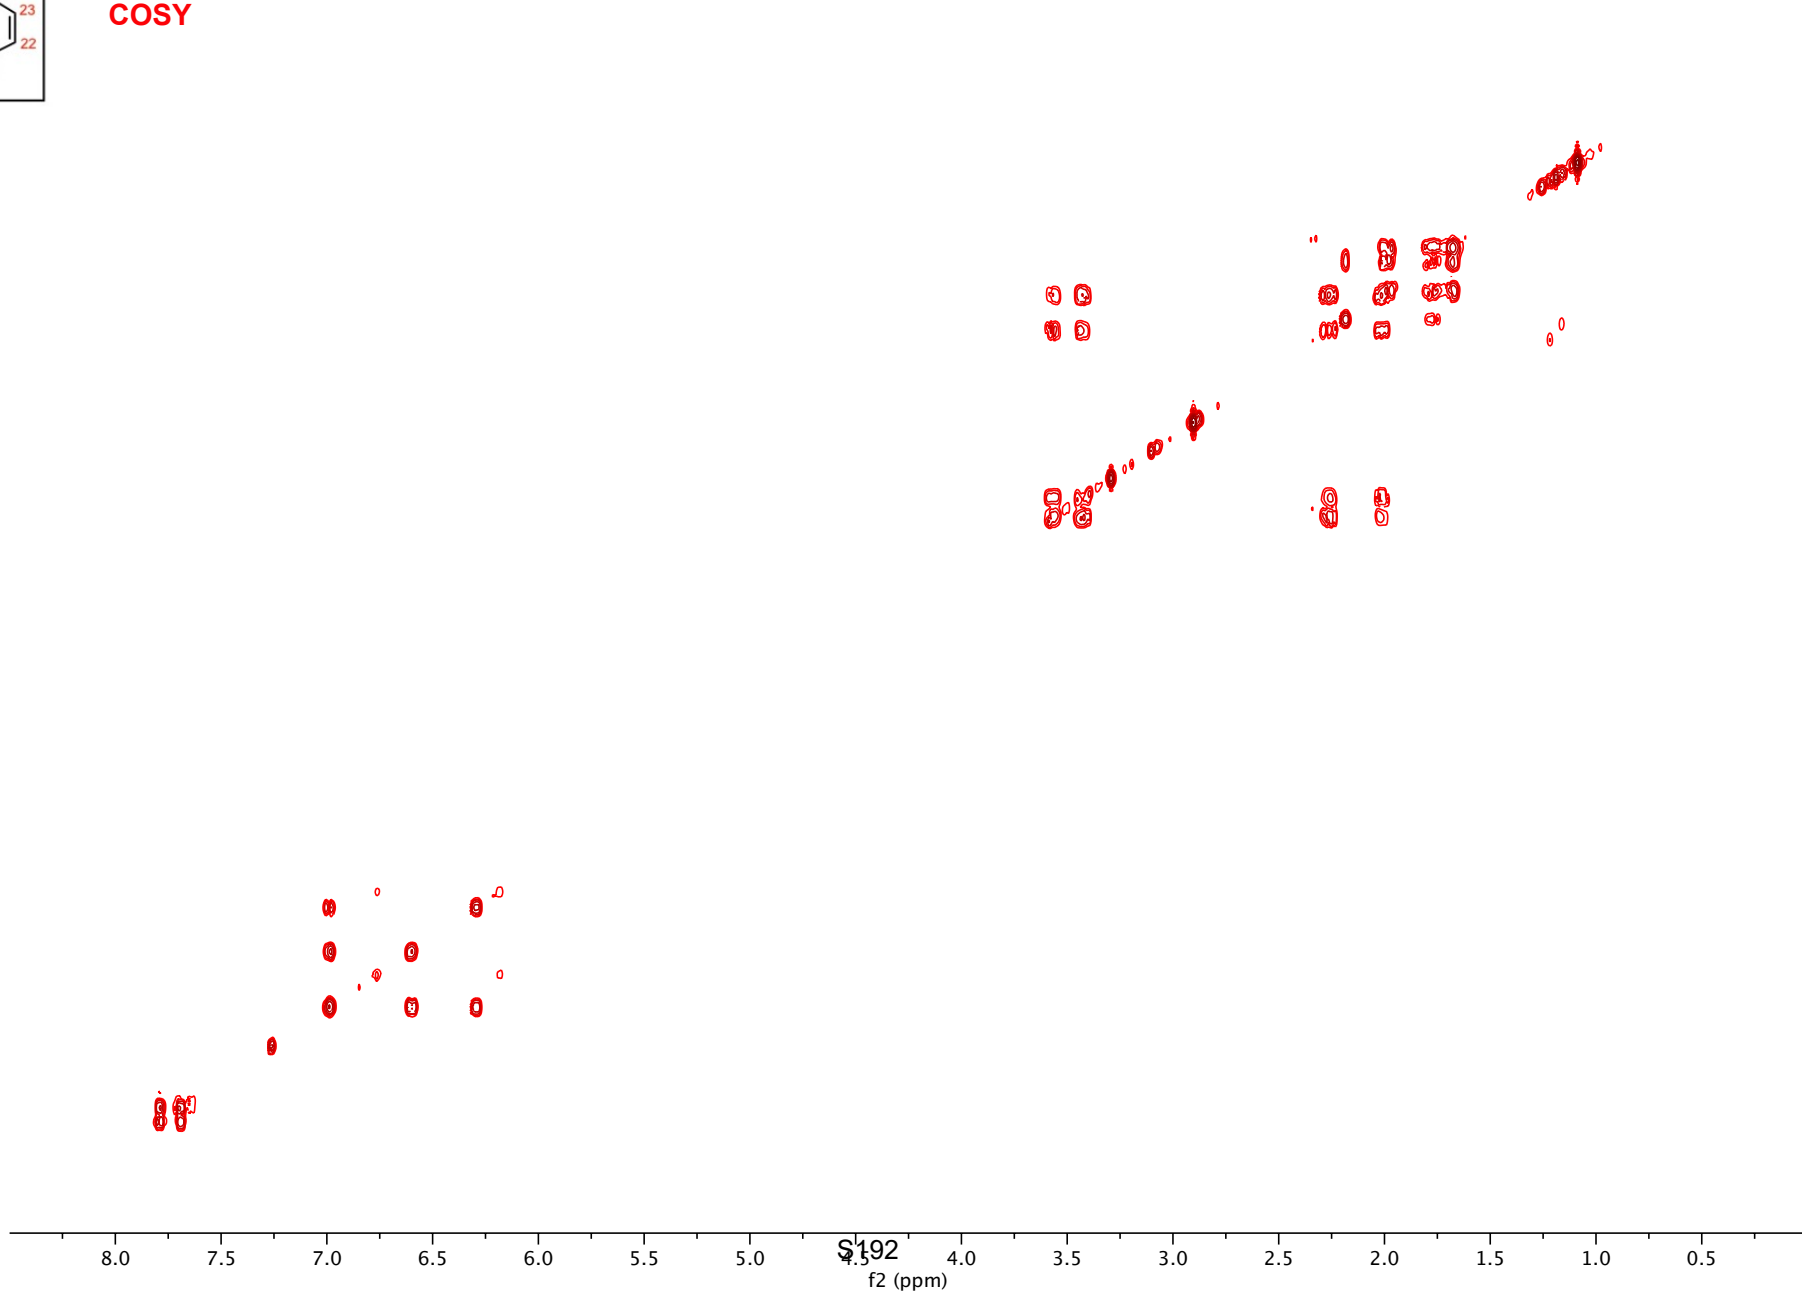

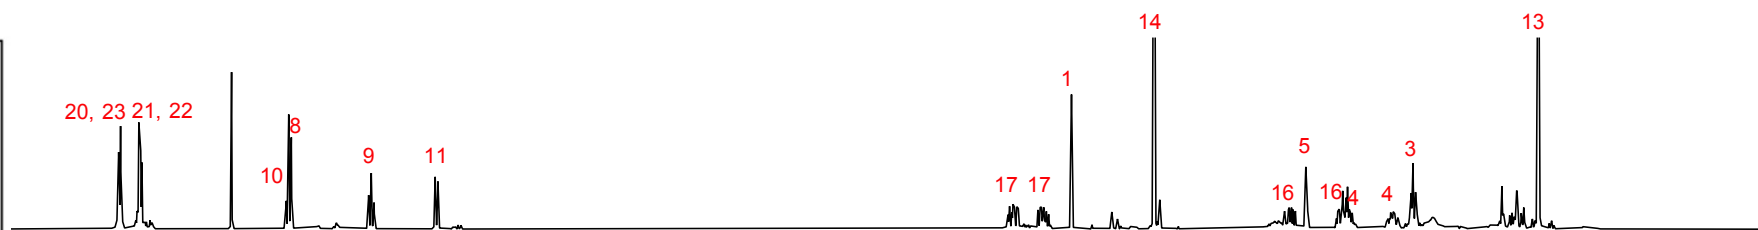

**HSQC**

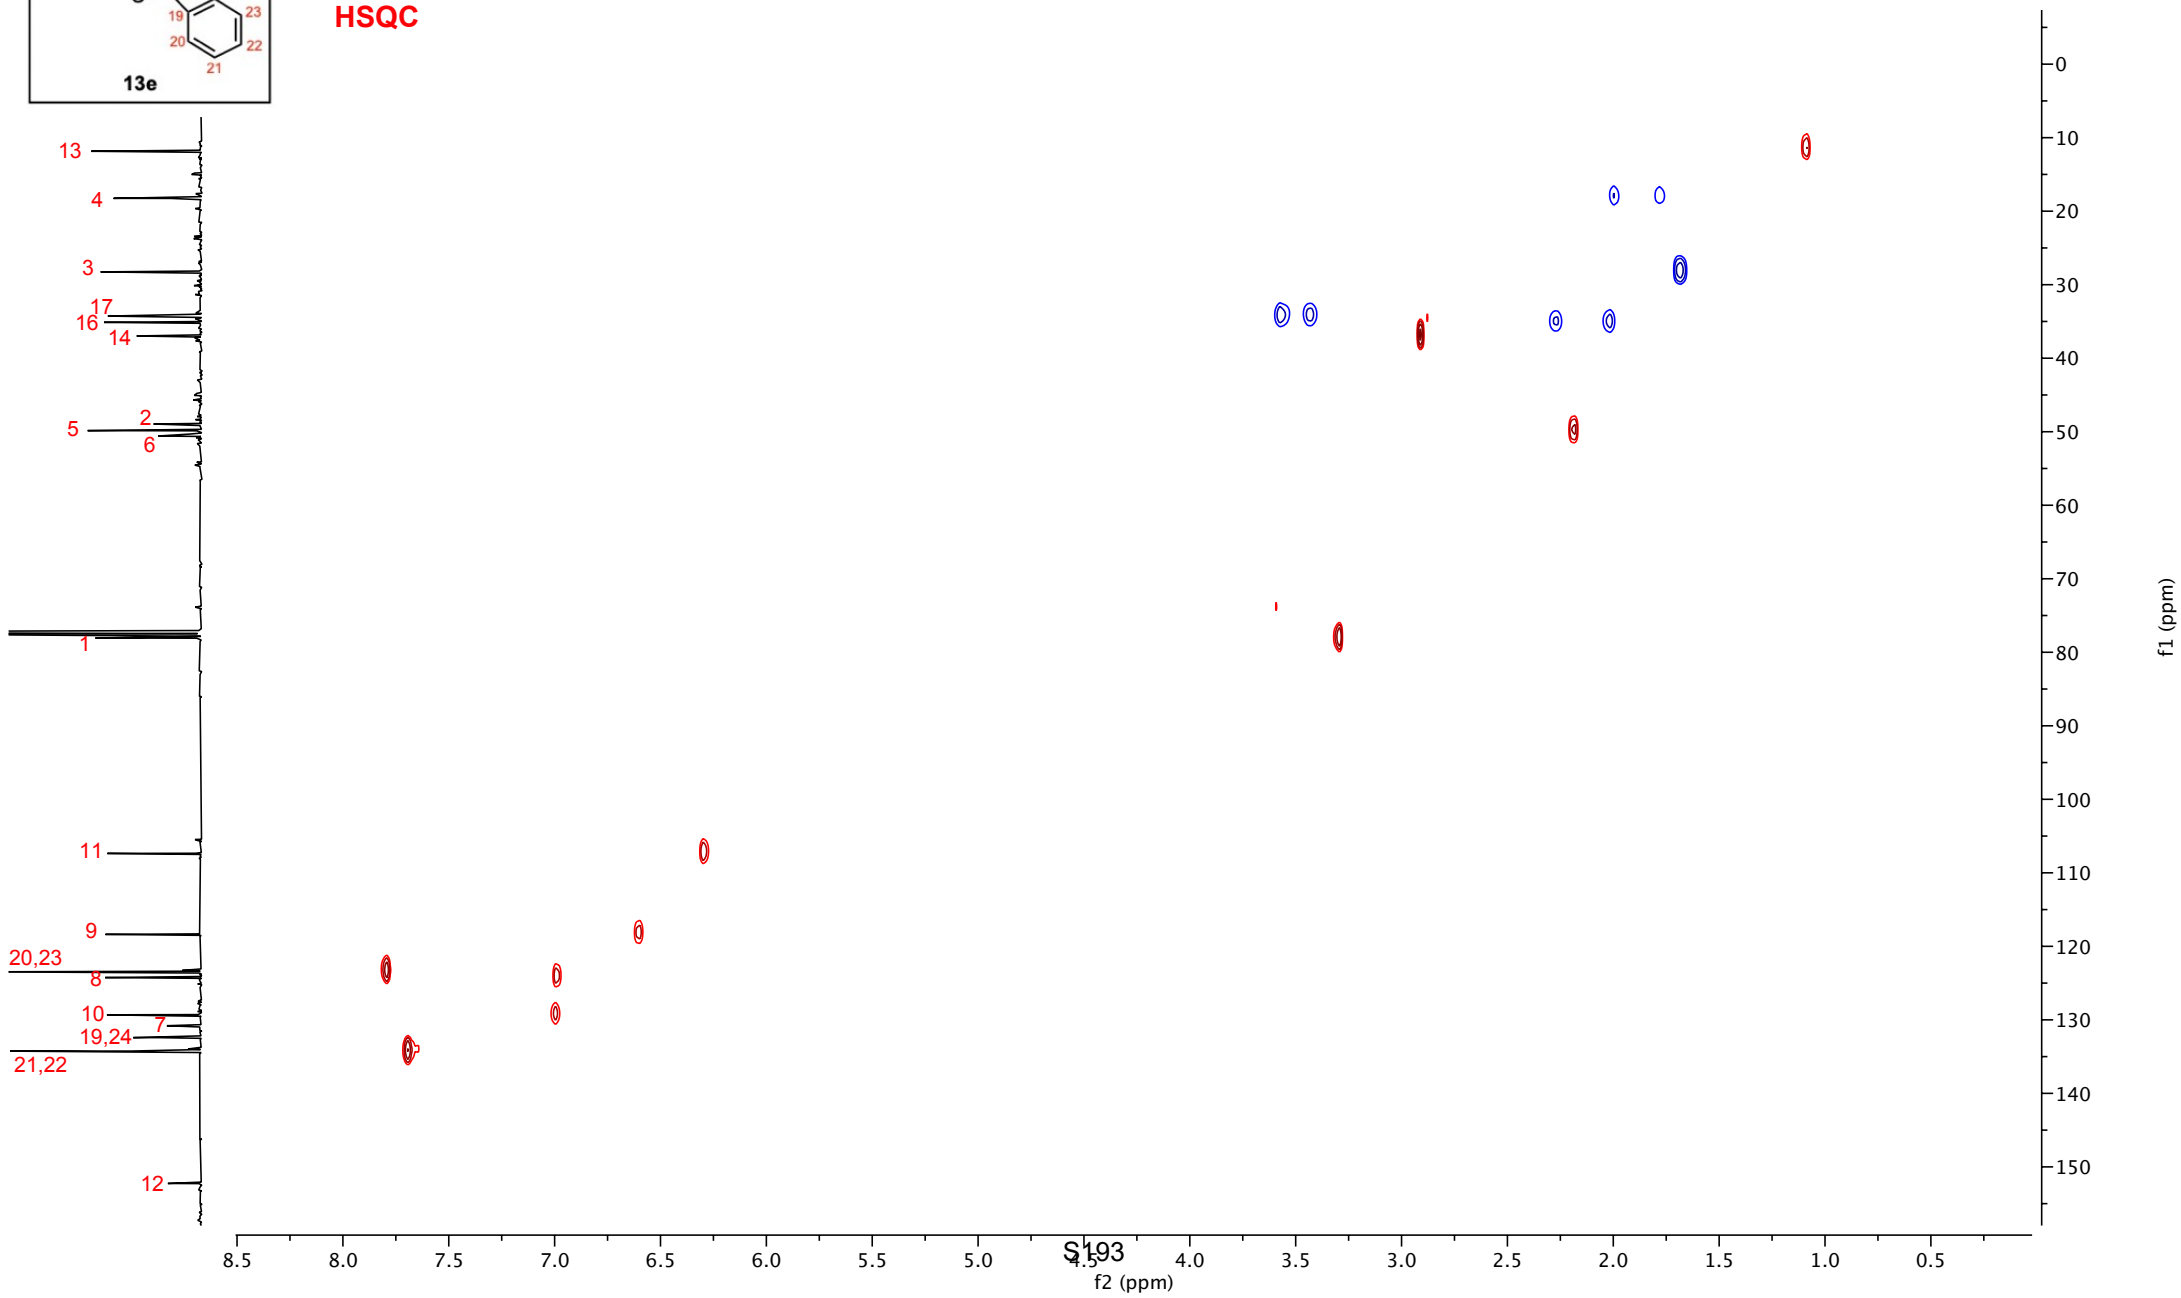

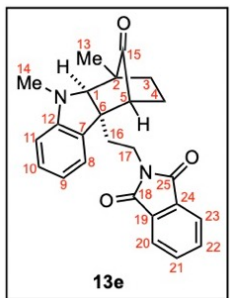

20, 23 21, 22

**HMBC**

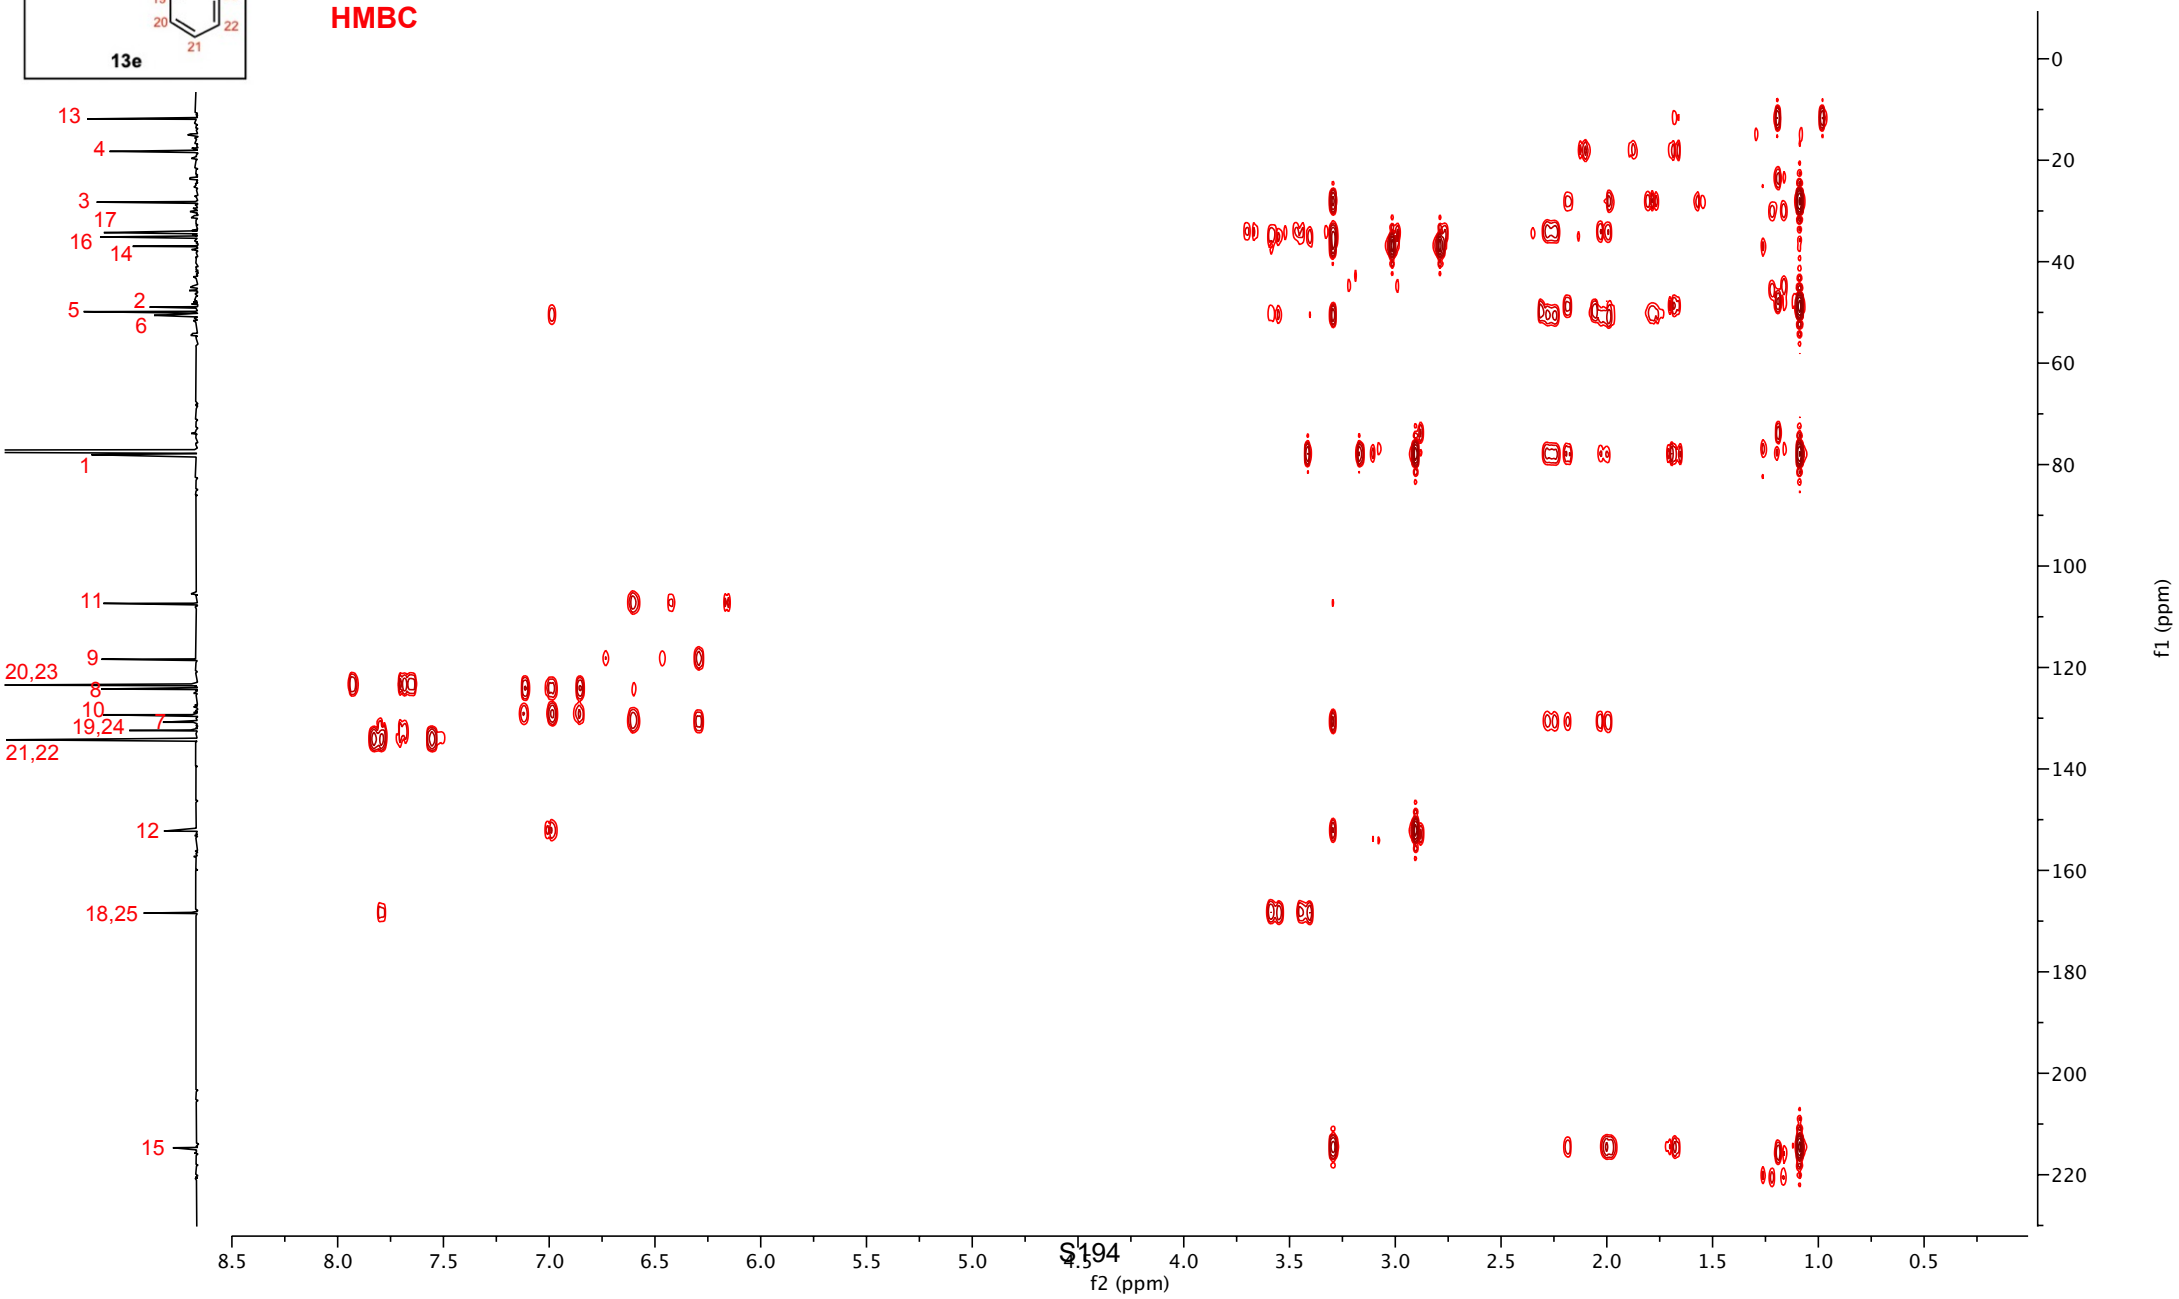

7.71  
7.70  
7.69  
7.64  
7.64  
7.63  
7.63  
6.89  
6.88  
6.88  
6.87  
6.86  
6.86  
6.85  
6.84  
6.84  
6.45  
6.45  
6.44  
6.43  
6.43  
6.42  
6.42  
6.27  
6.26

3.76  
3.57  
3.55  
3.54  
3.54  
3.53  
3.52  
3.51  
3.50  
3.49  
3.48  
3.48  
2.89  
2.90  
2.39  
2.38  
2.37  
2.37  
2.36  
2.35  
1.96  
1.95  
1.84  
1.83  
1.82  
1.82  
1.81  
1.80  
1.79  
1.74  
1.73  
1.72  
1.71  
1.69  
1.69  
1.68  
1.68  
1.66  
1.66  
1.65  
1.64  
1.63  
1.62  
1.62  
1.61  
1.61  
1.61  
1.60  
1.59  
1.59  
1.58  
1.58  
1.57  
1.57  
1.56  
1.47  
1.47  
1.46  
1.46  
1.45  
1.45  
1.44  
1.44  
1.43  
1.43  
1.42  
1.42  
1.34  
1.33  
1.32  
1.32  
1.31  
1.31  
1.30  
1.29  
1.07  
1.06  
1.05

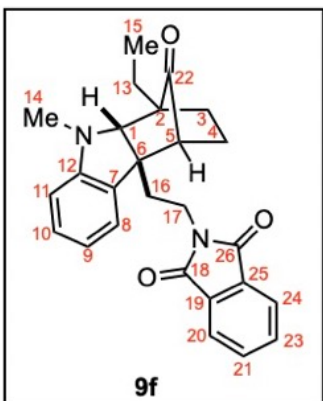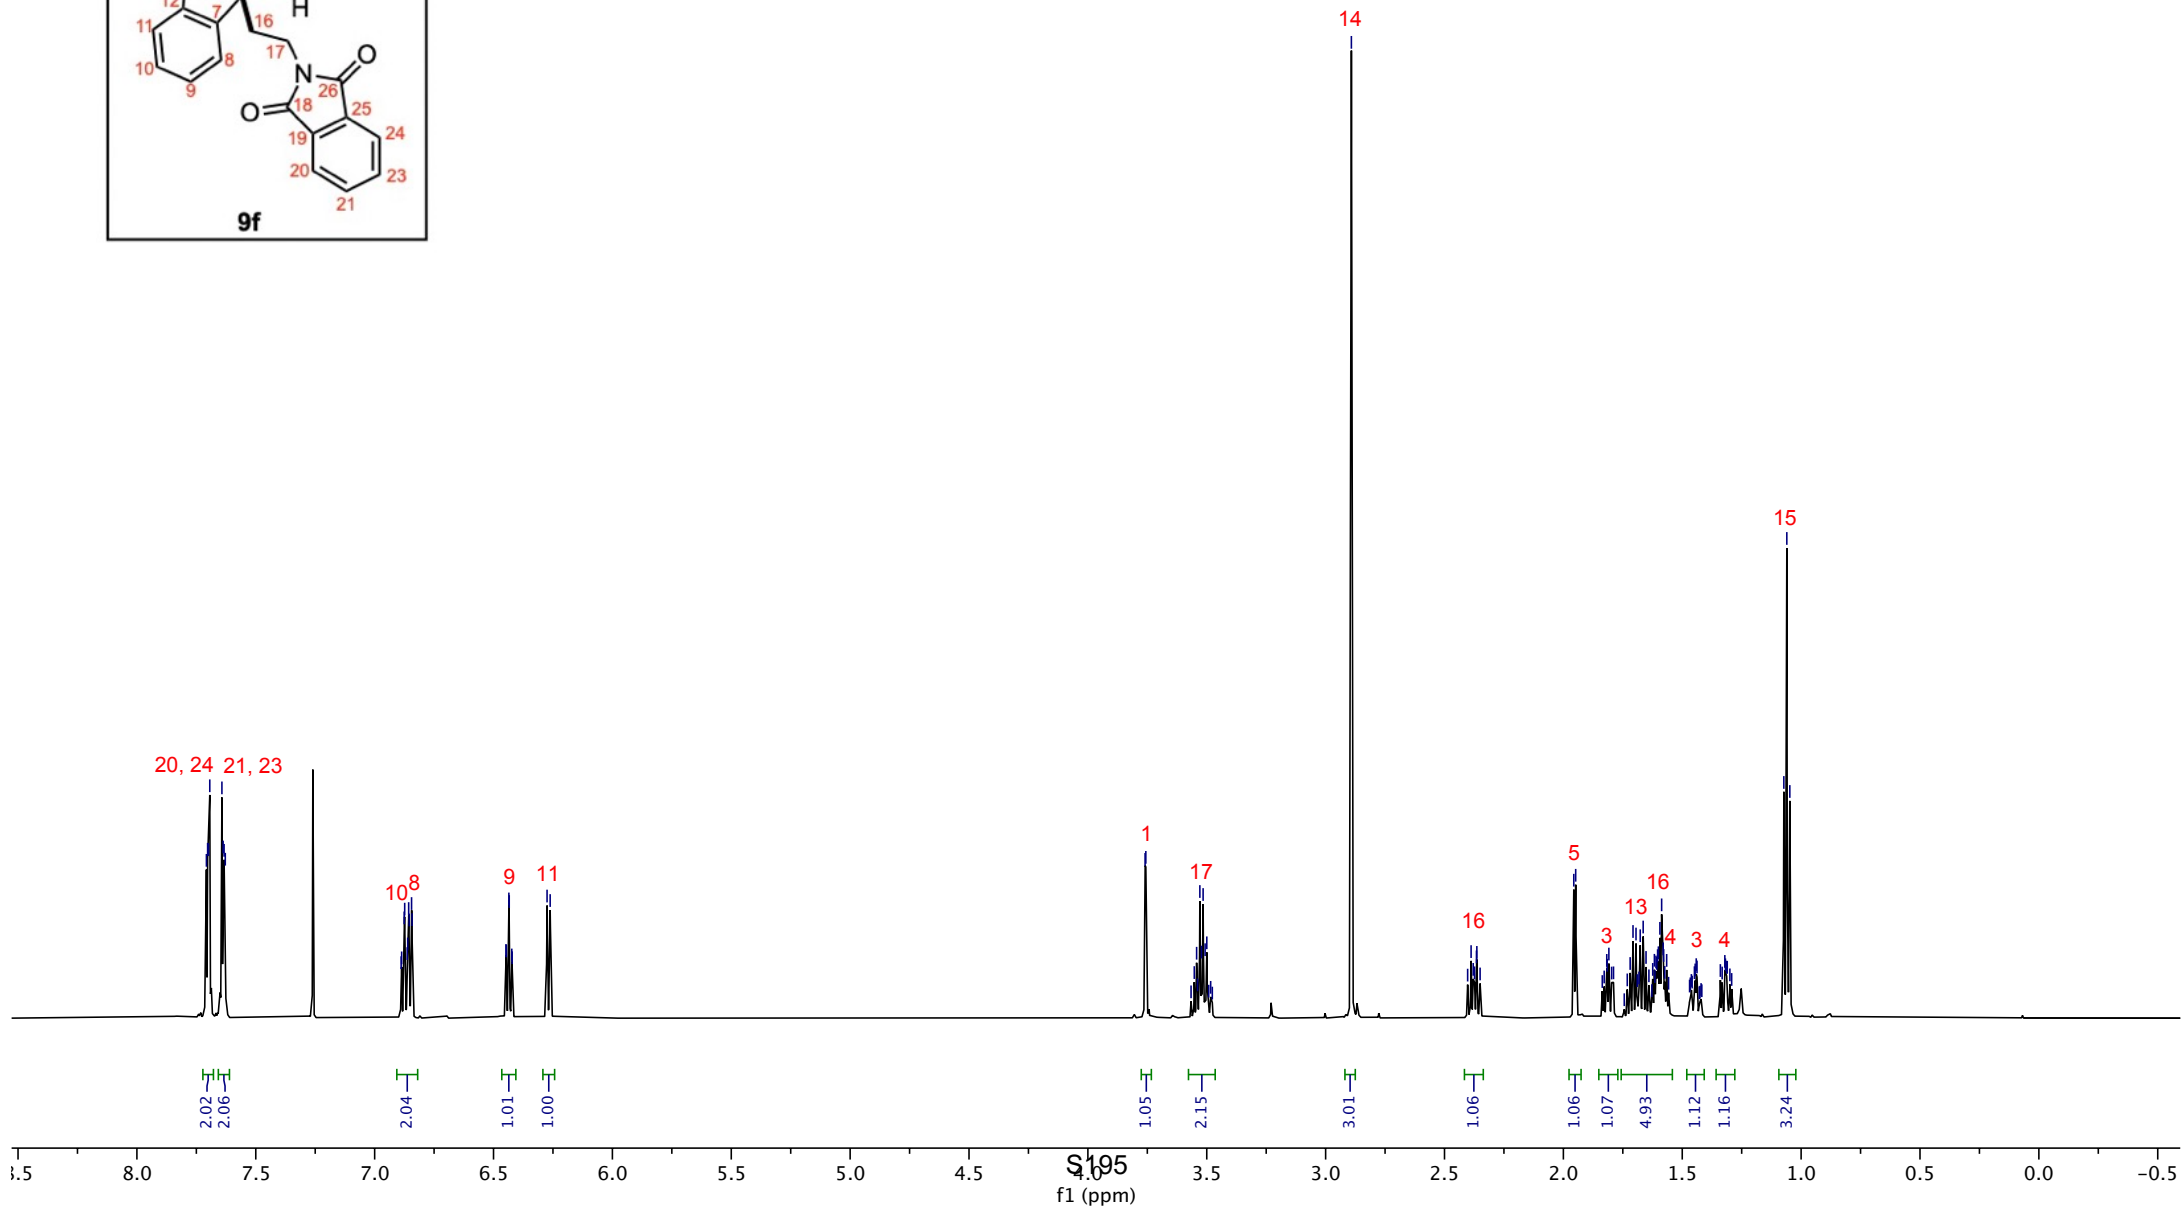

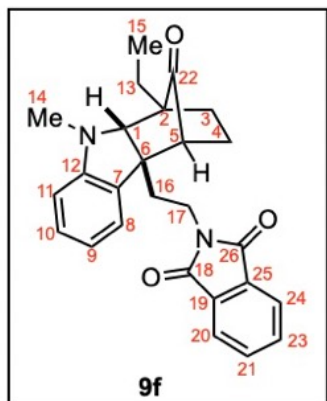

— 215.58

— 168.24

— 154.60

— 133.97

— 132.37

— 128.83

— 128.36

— 124.64

— 123.28

— 117.47

— 106.11

— 71.23

— 51.67

— 50.86

— 50.65

— 36.86

— 35.24

— 33.84

— 22.19

— 21.49

— 19.37

— 9.53

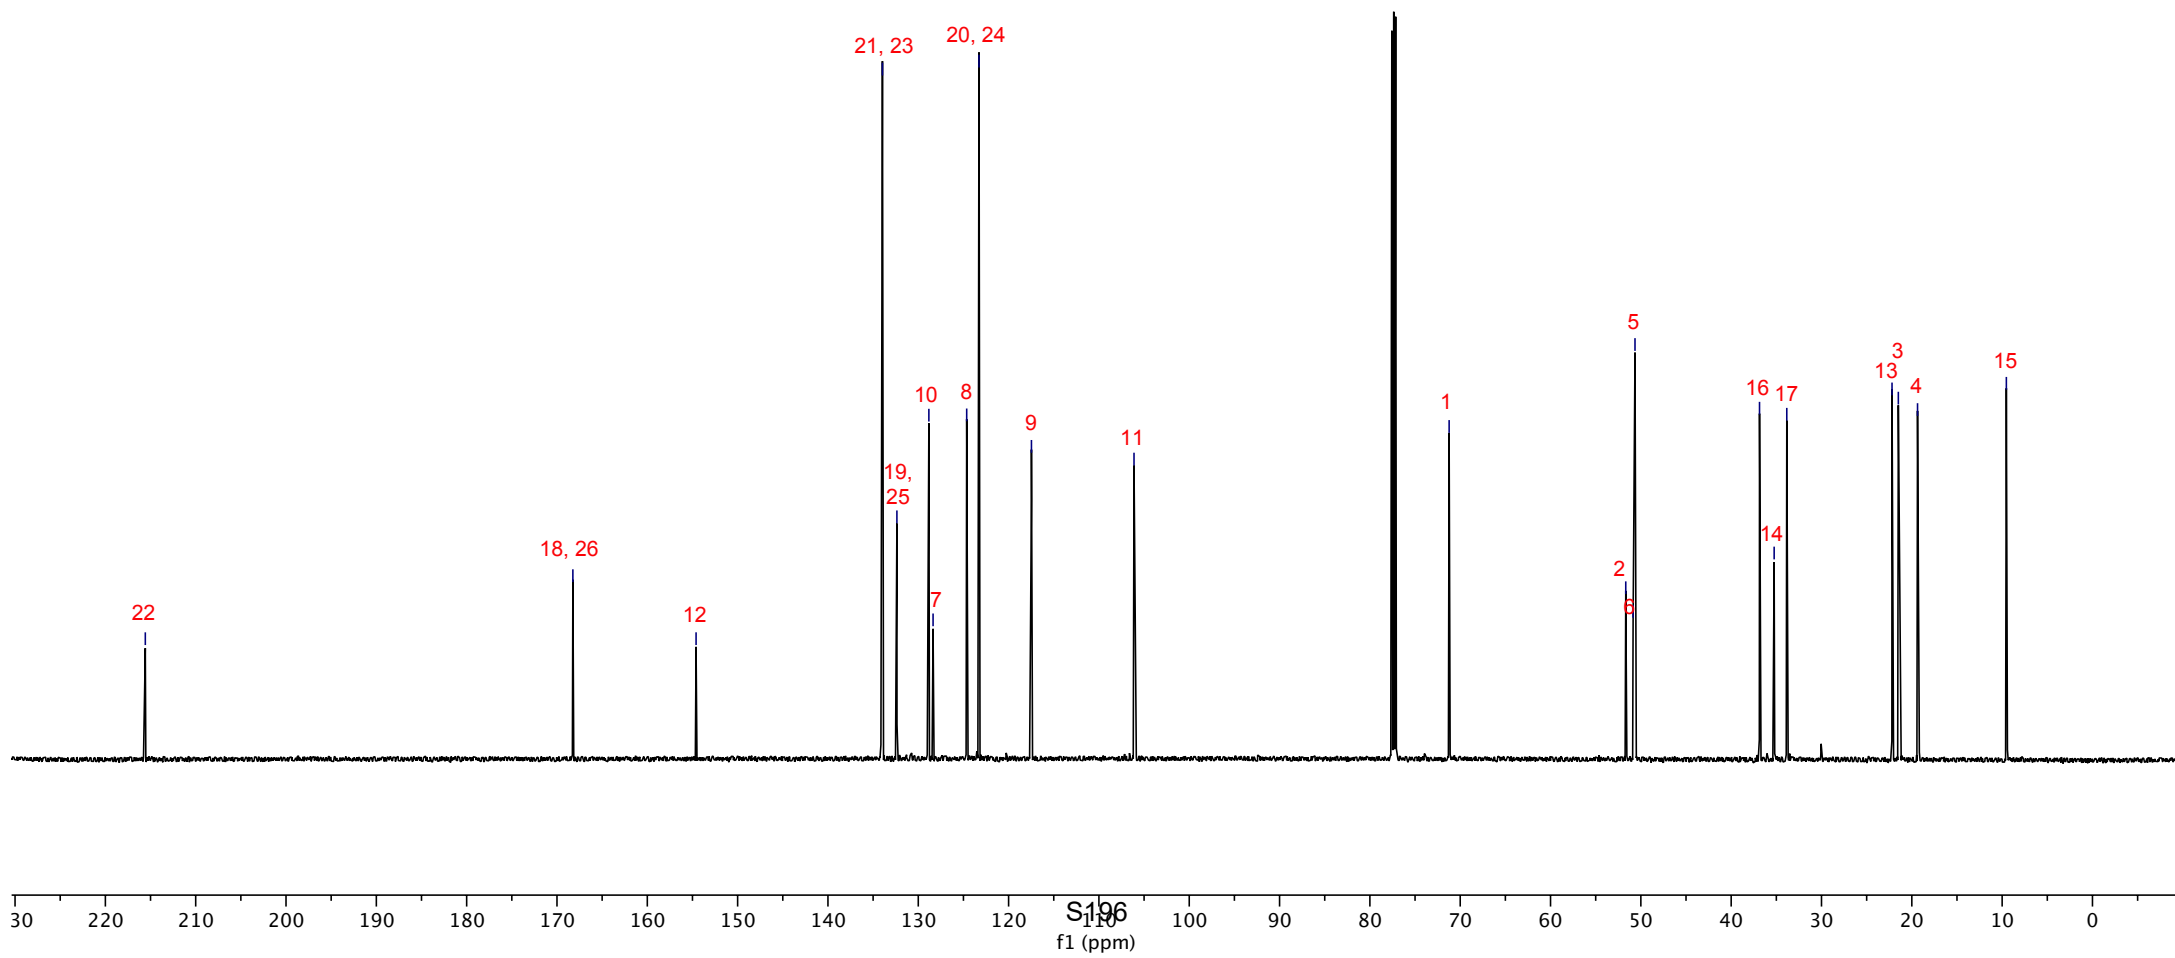

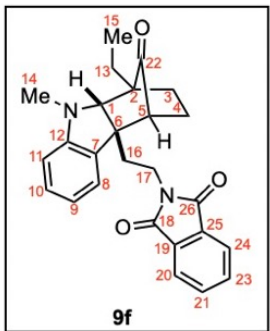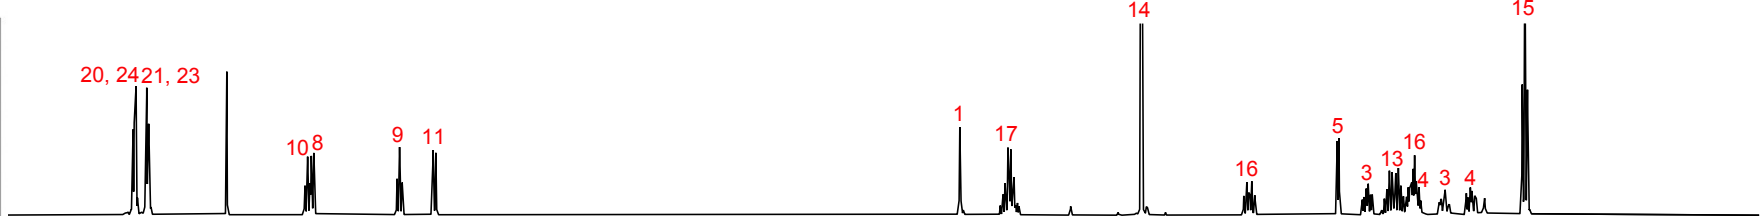

**COSY**

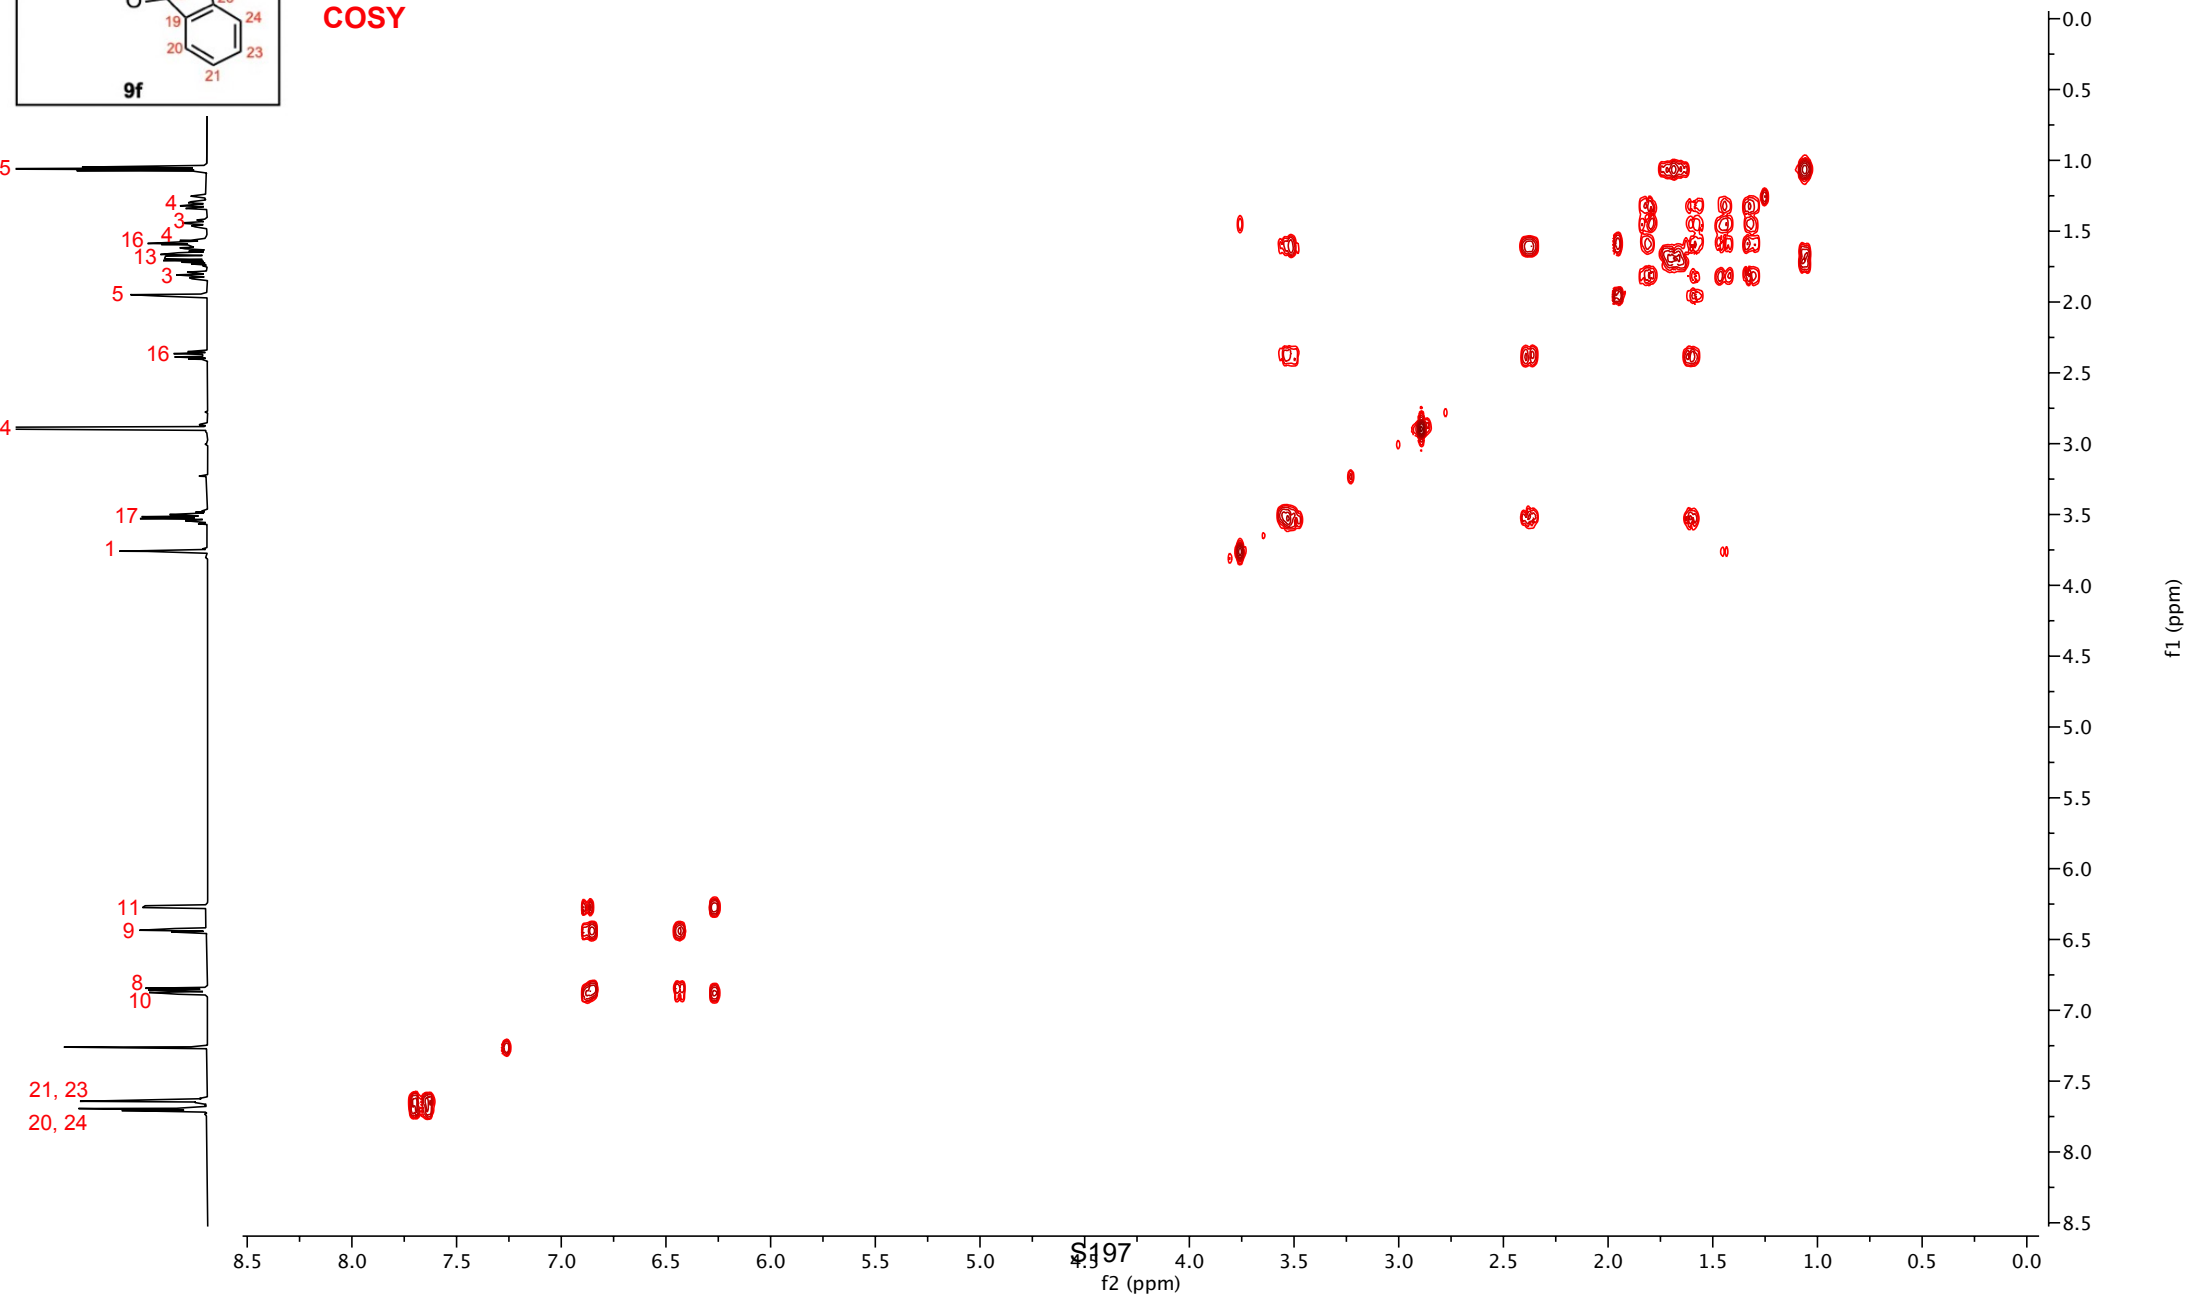

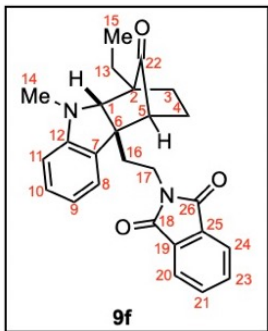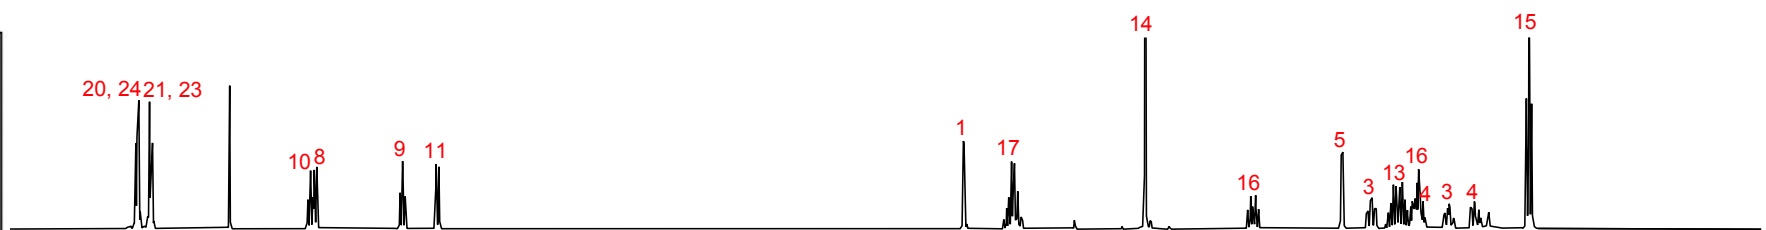

**HSQC**

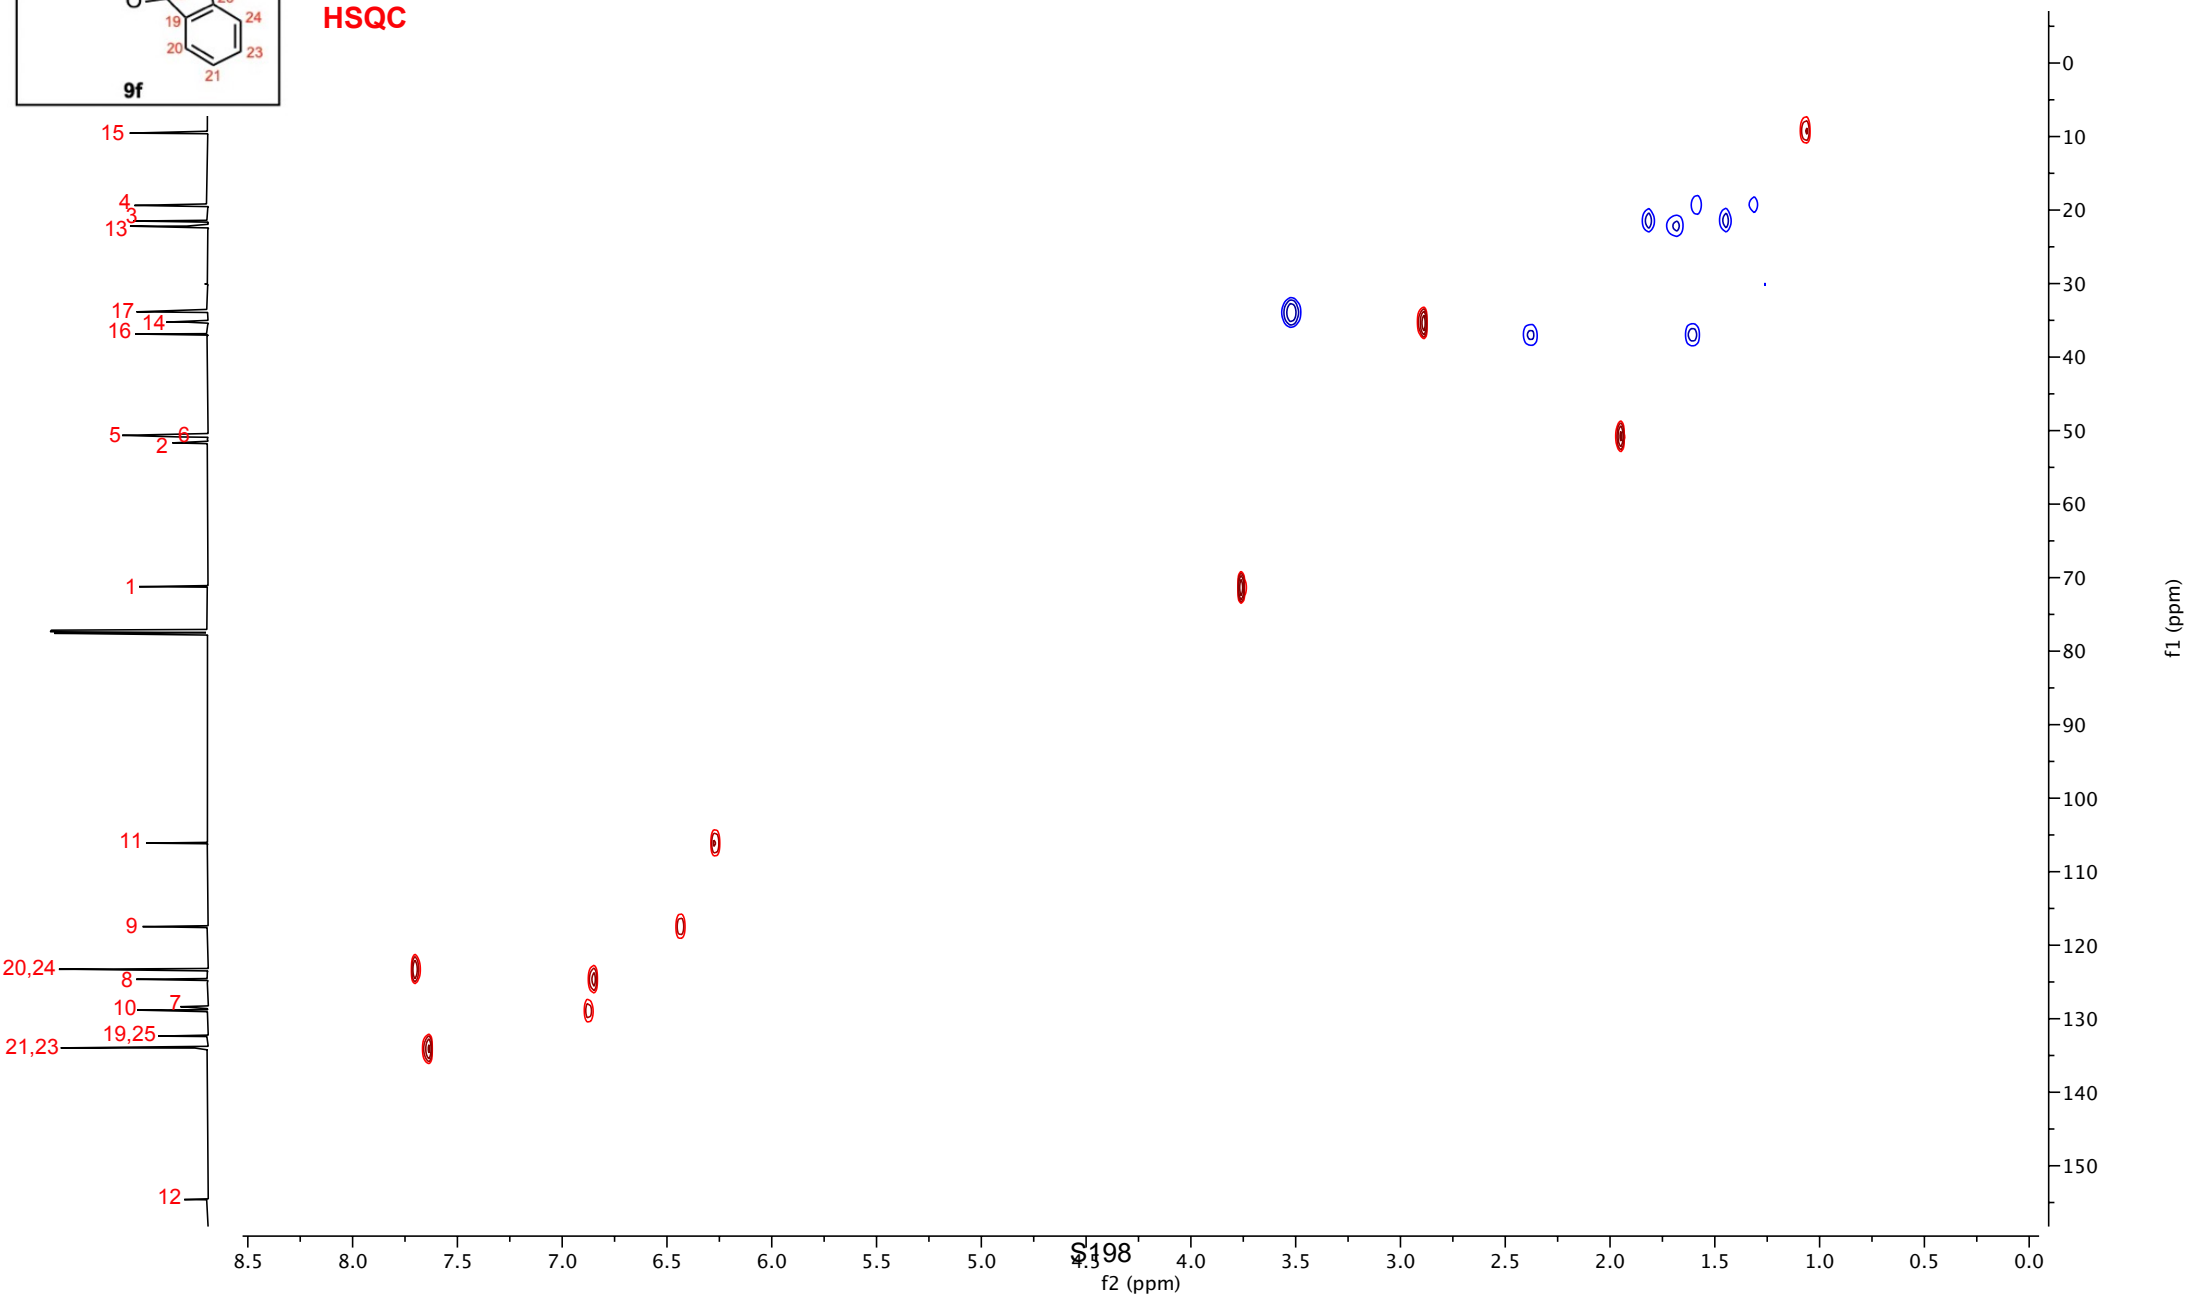

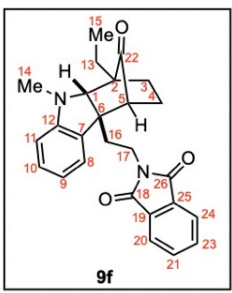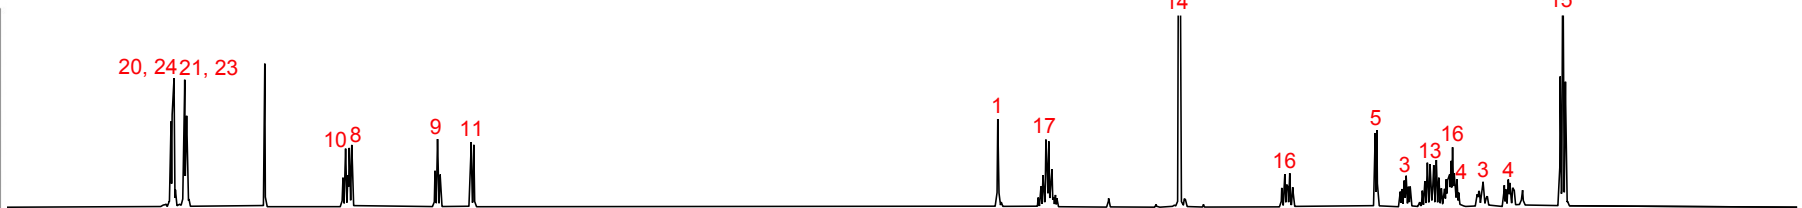

**HMBC**

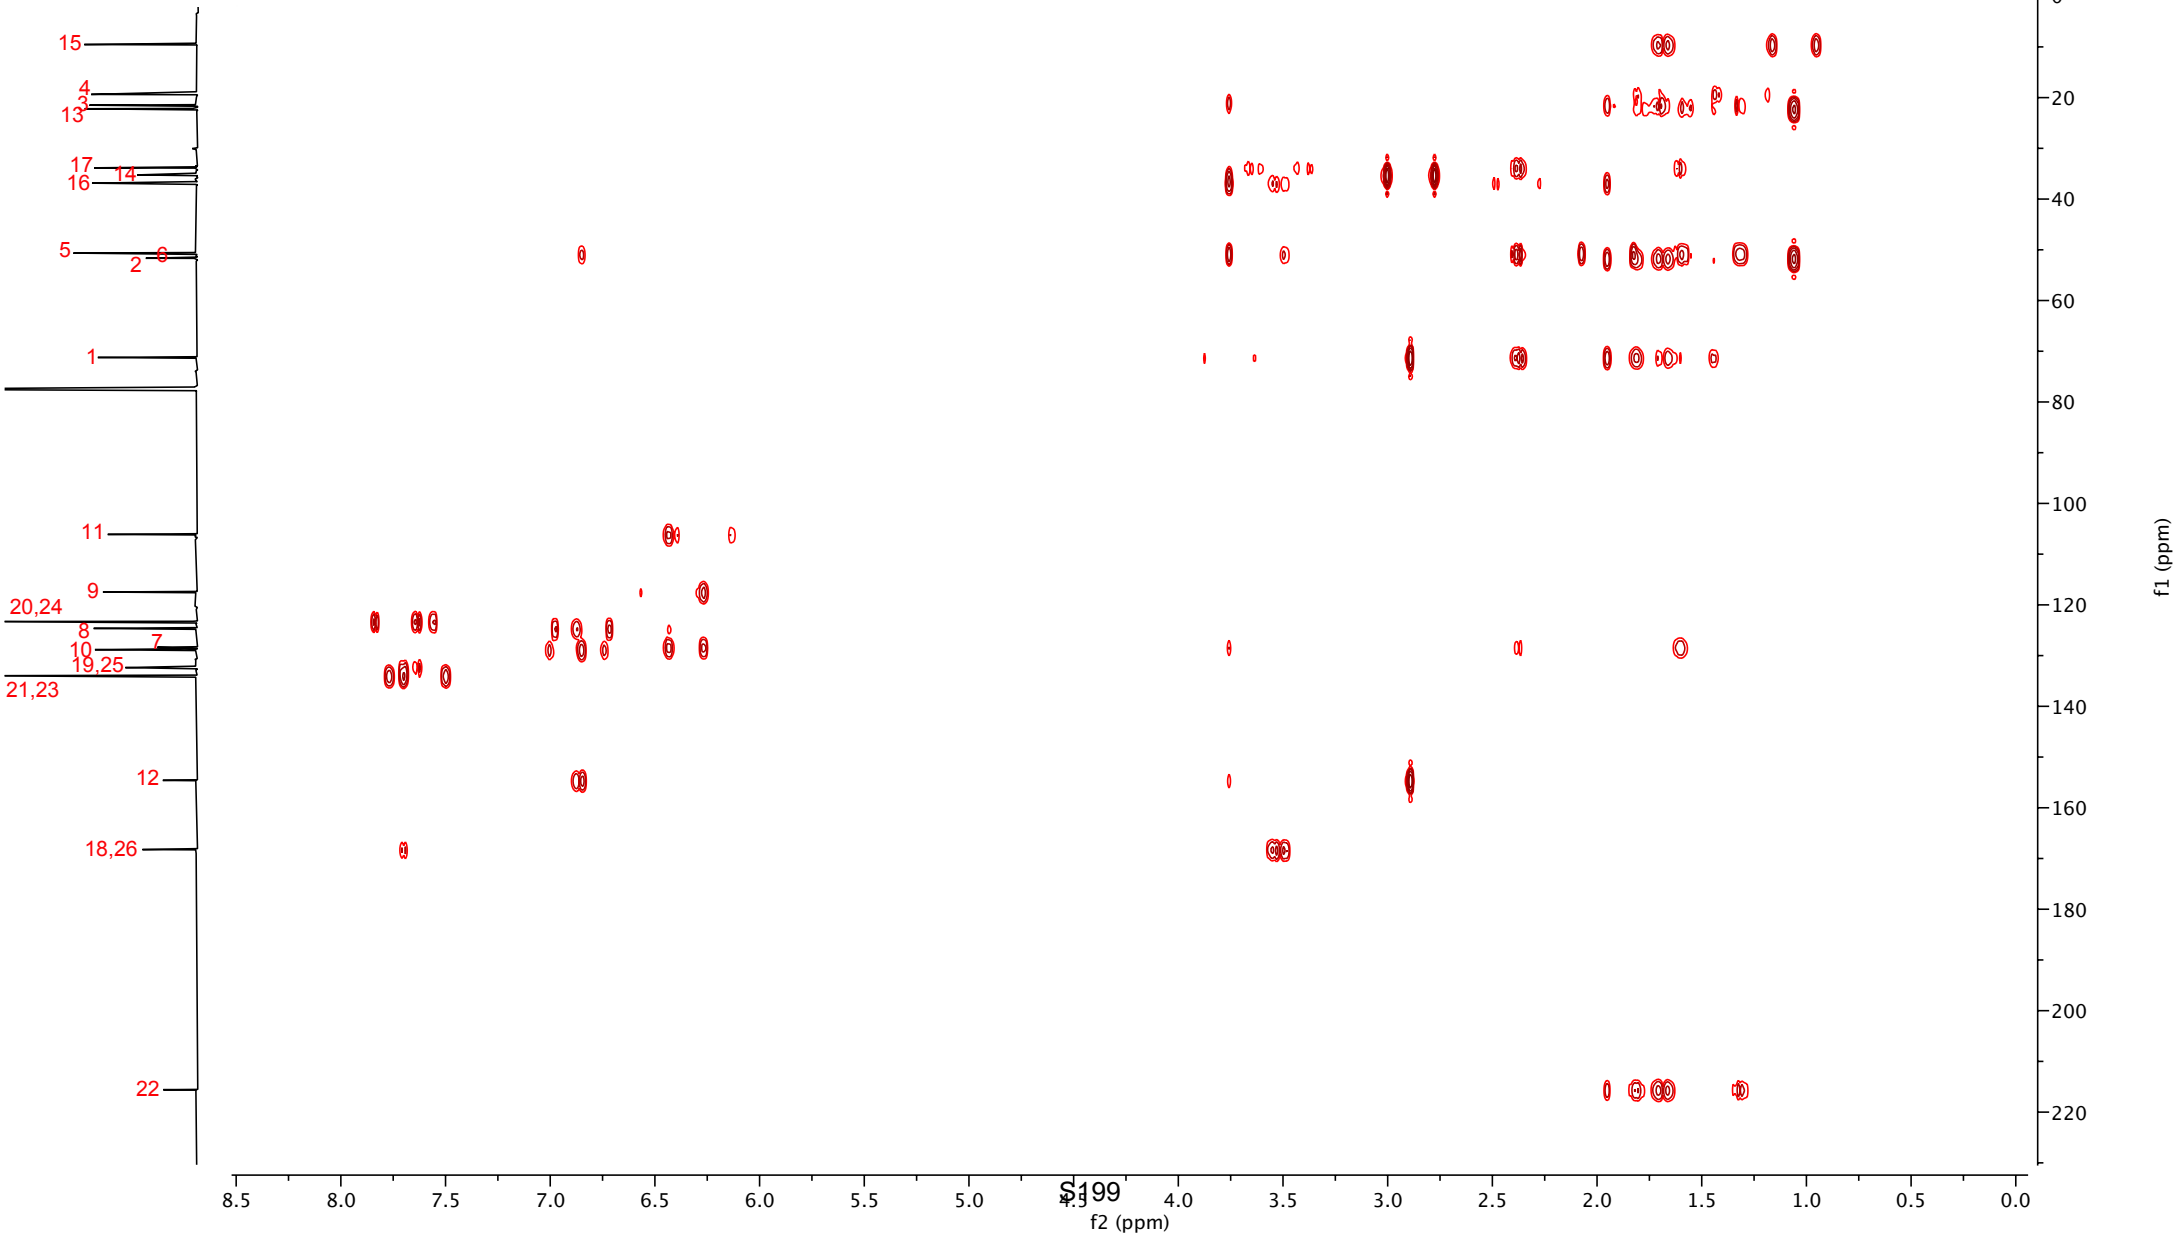



7.80  
7.80  
7.79  
7.79  
7.70  
7.70  
7.69  
7.69  
7.00  
7.00  
6.99  
6.99  
6.99  
6.98  
6.98  
6.98  
6.97  
6.62  
6.60  
6.59  
6.32  
6.31

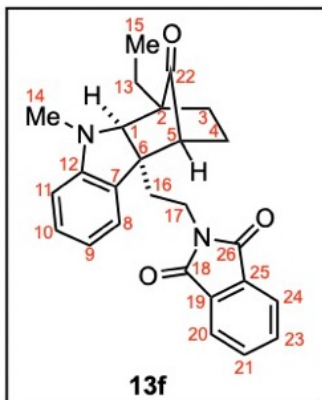

3.60  
3.59  
3.58  
3.58  
3.58  
3.57  
3.57  
3.56  
3.55  
3.55  
3.46  
3.45  
3.44  
3.43  
3.43  
3.42  
3.42  
3.41  
3.36  
2.92  
2.29  
2.28  
2.27  
2.27  
2.26  
2.26  
2.25  
2.24  
2.16  
2.16  
2.02  
2.02  
2.00  
2.00  
1.99  
1.98  
1.98  
1.98  
1.81  
1.80  
1.79  
1.78  
1.77  
1.76  
1.75  
1.75  
1.74  
1.74  
1.73  
1.73  
1.72  
1.65  
1.64  
1.63  
1.62  
1.61  
1.61  
1.60  
1.60  
1.59  
1.58  
1.58  
1.57  
1.56  
1.56  
1.55  
1.55  
0.98  
0.98  
0.98  
0.97  
0.97

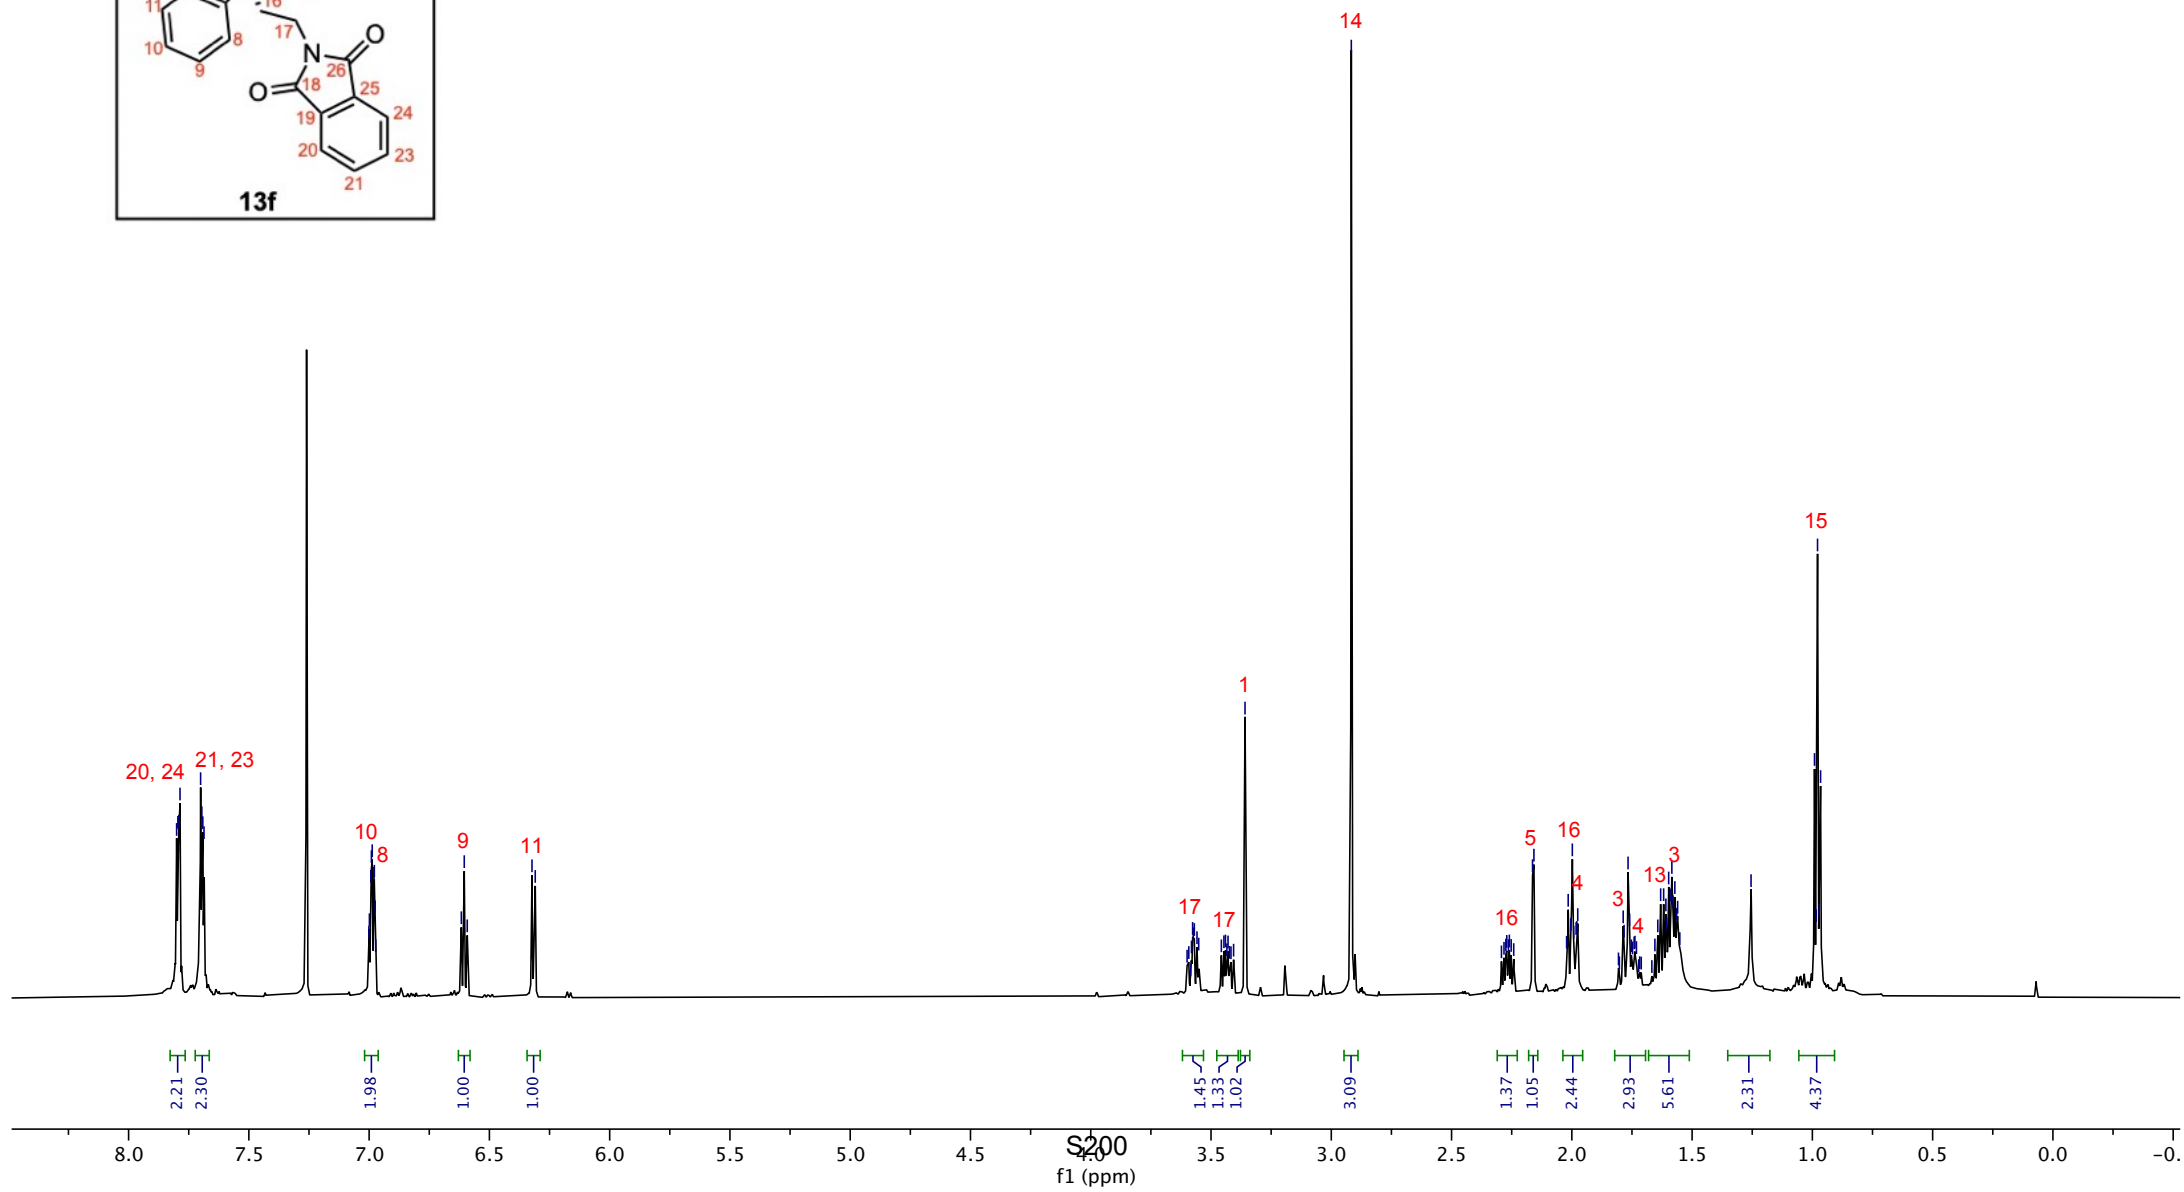

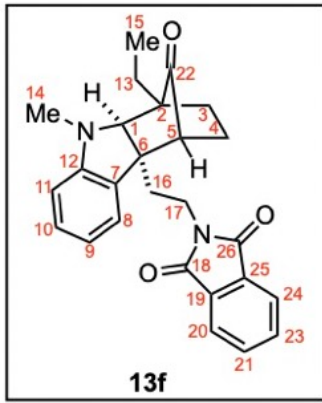

— 214.50

— 168.43

— 152.59

— 134.26

— 132.43

— 130.87

— 129.26

— 124.20

— 123.47

— 118.54

— 107.74

— 76.48

— 52.66

— 50.48

— 50.33

— 37.36

— 35.11

— 34.31

— 24.60

— 18.41

— 18.09

— 9.34

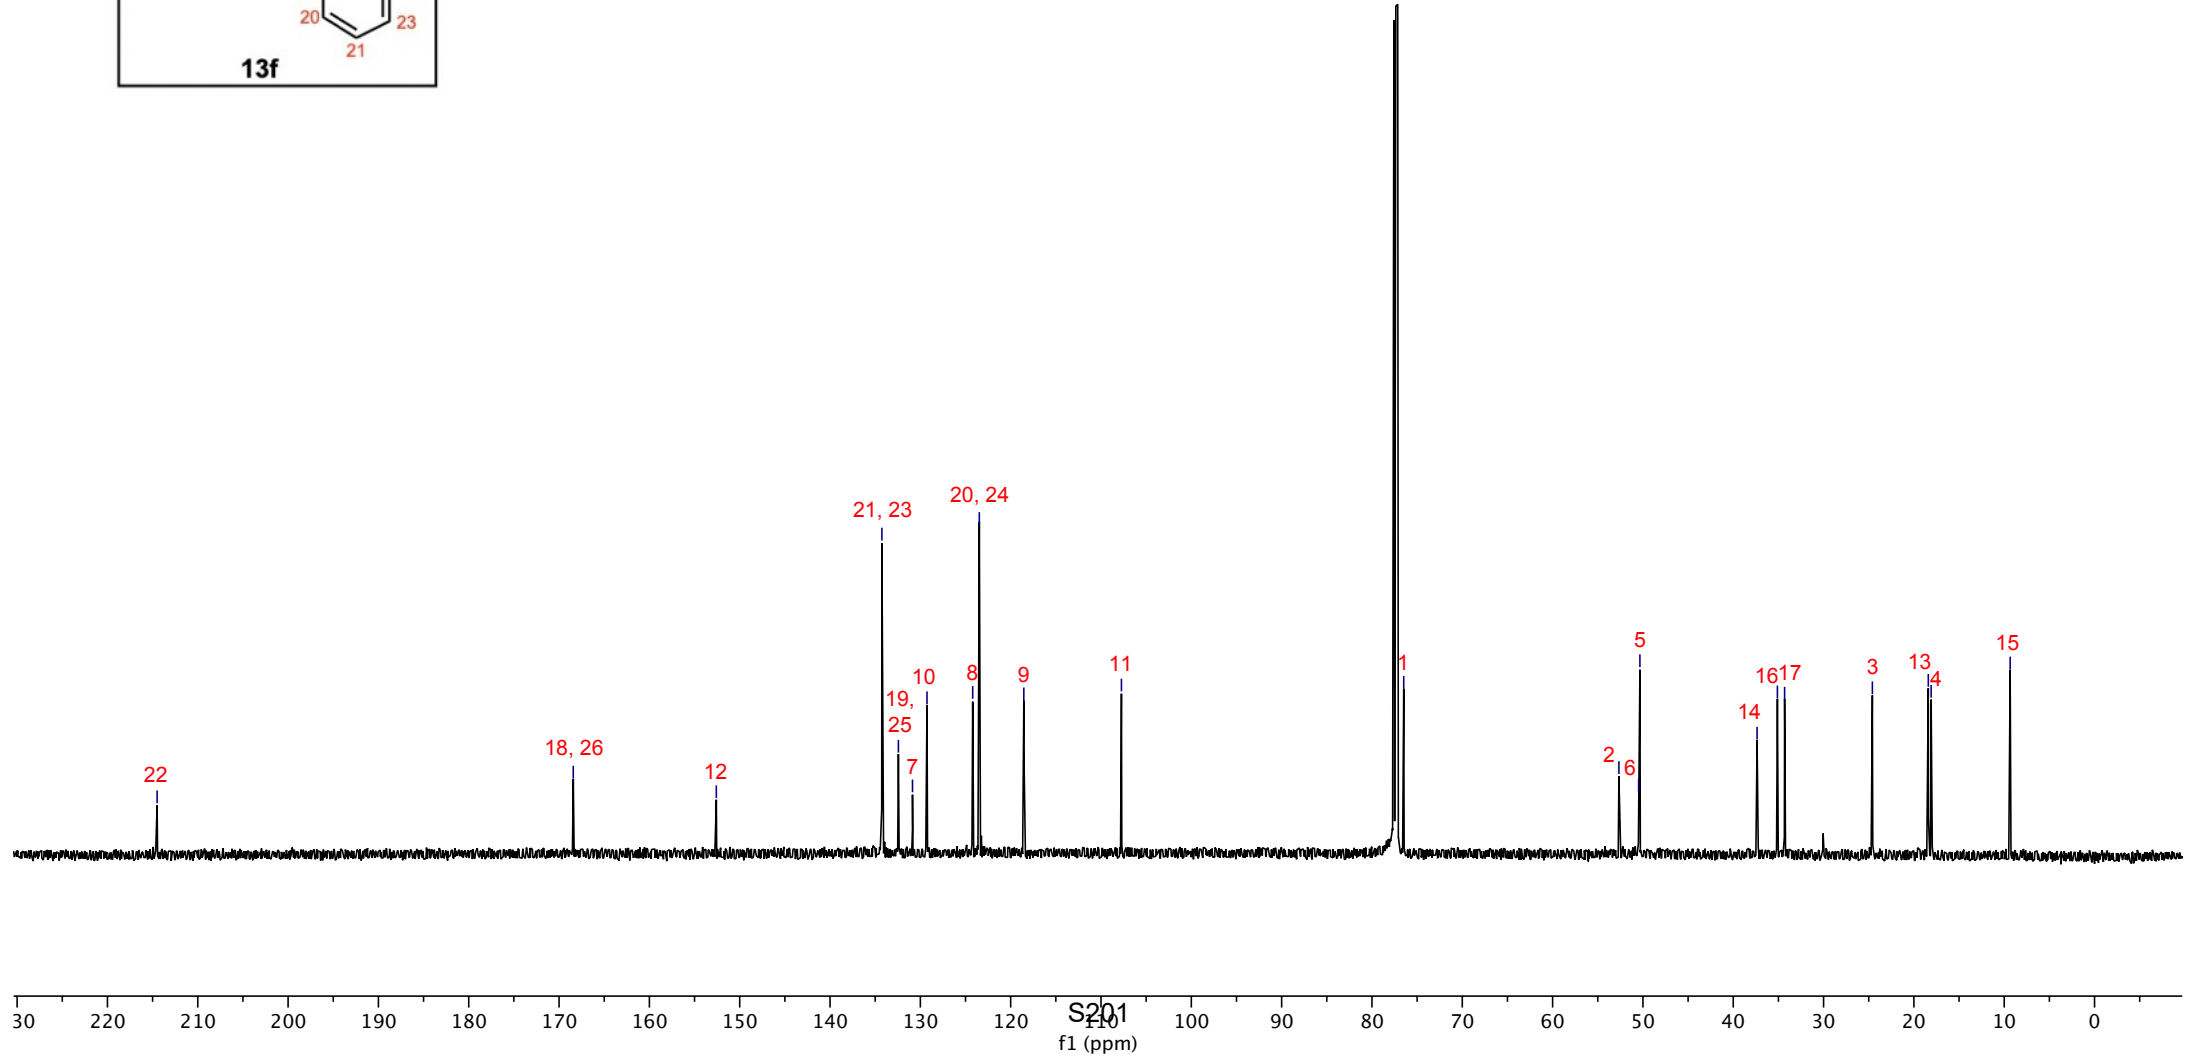

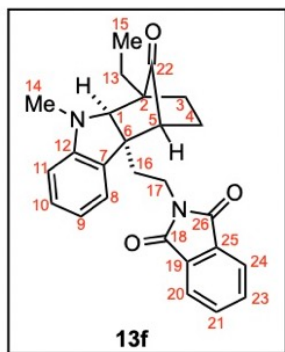

**COSY**

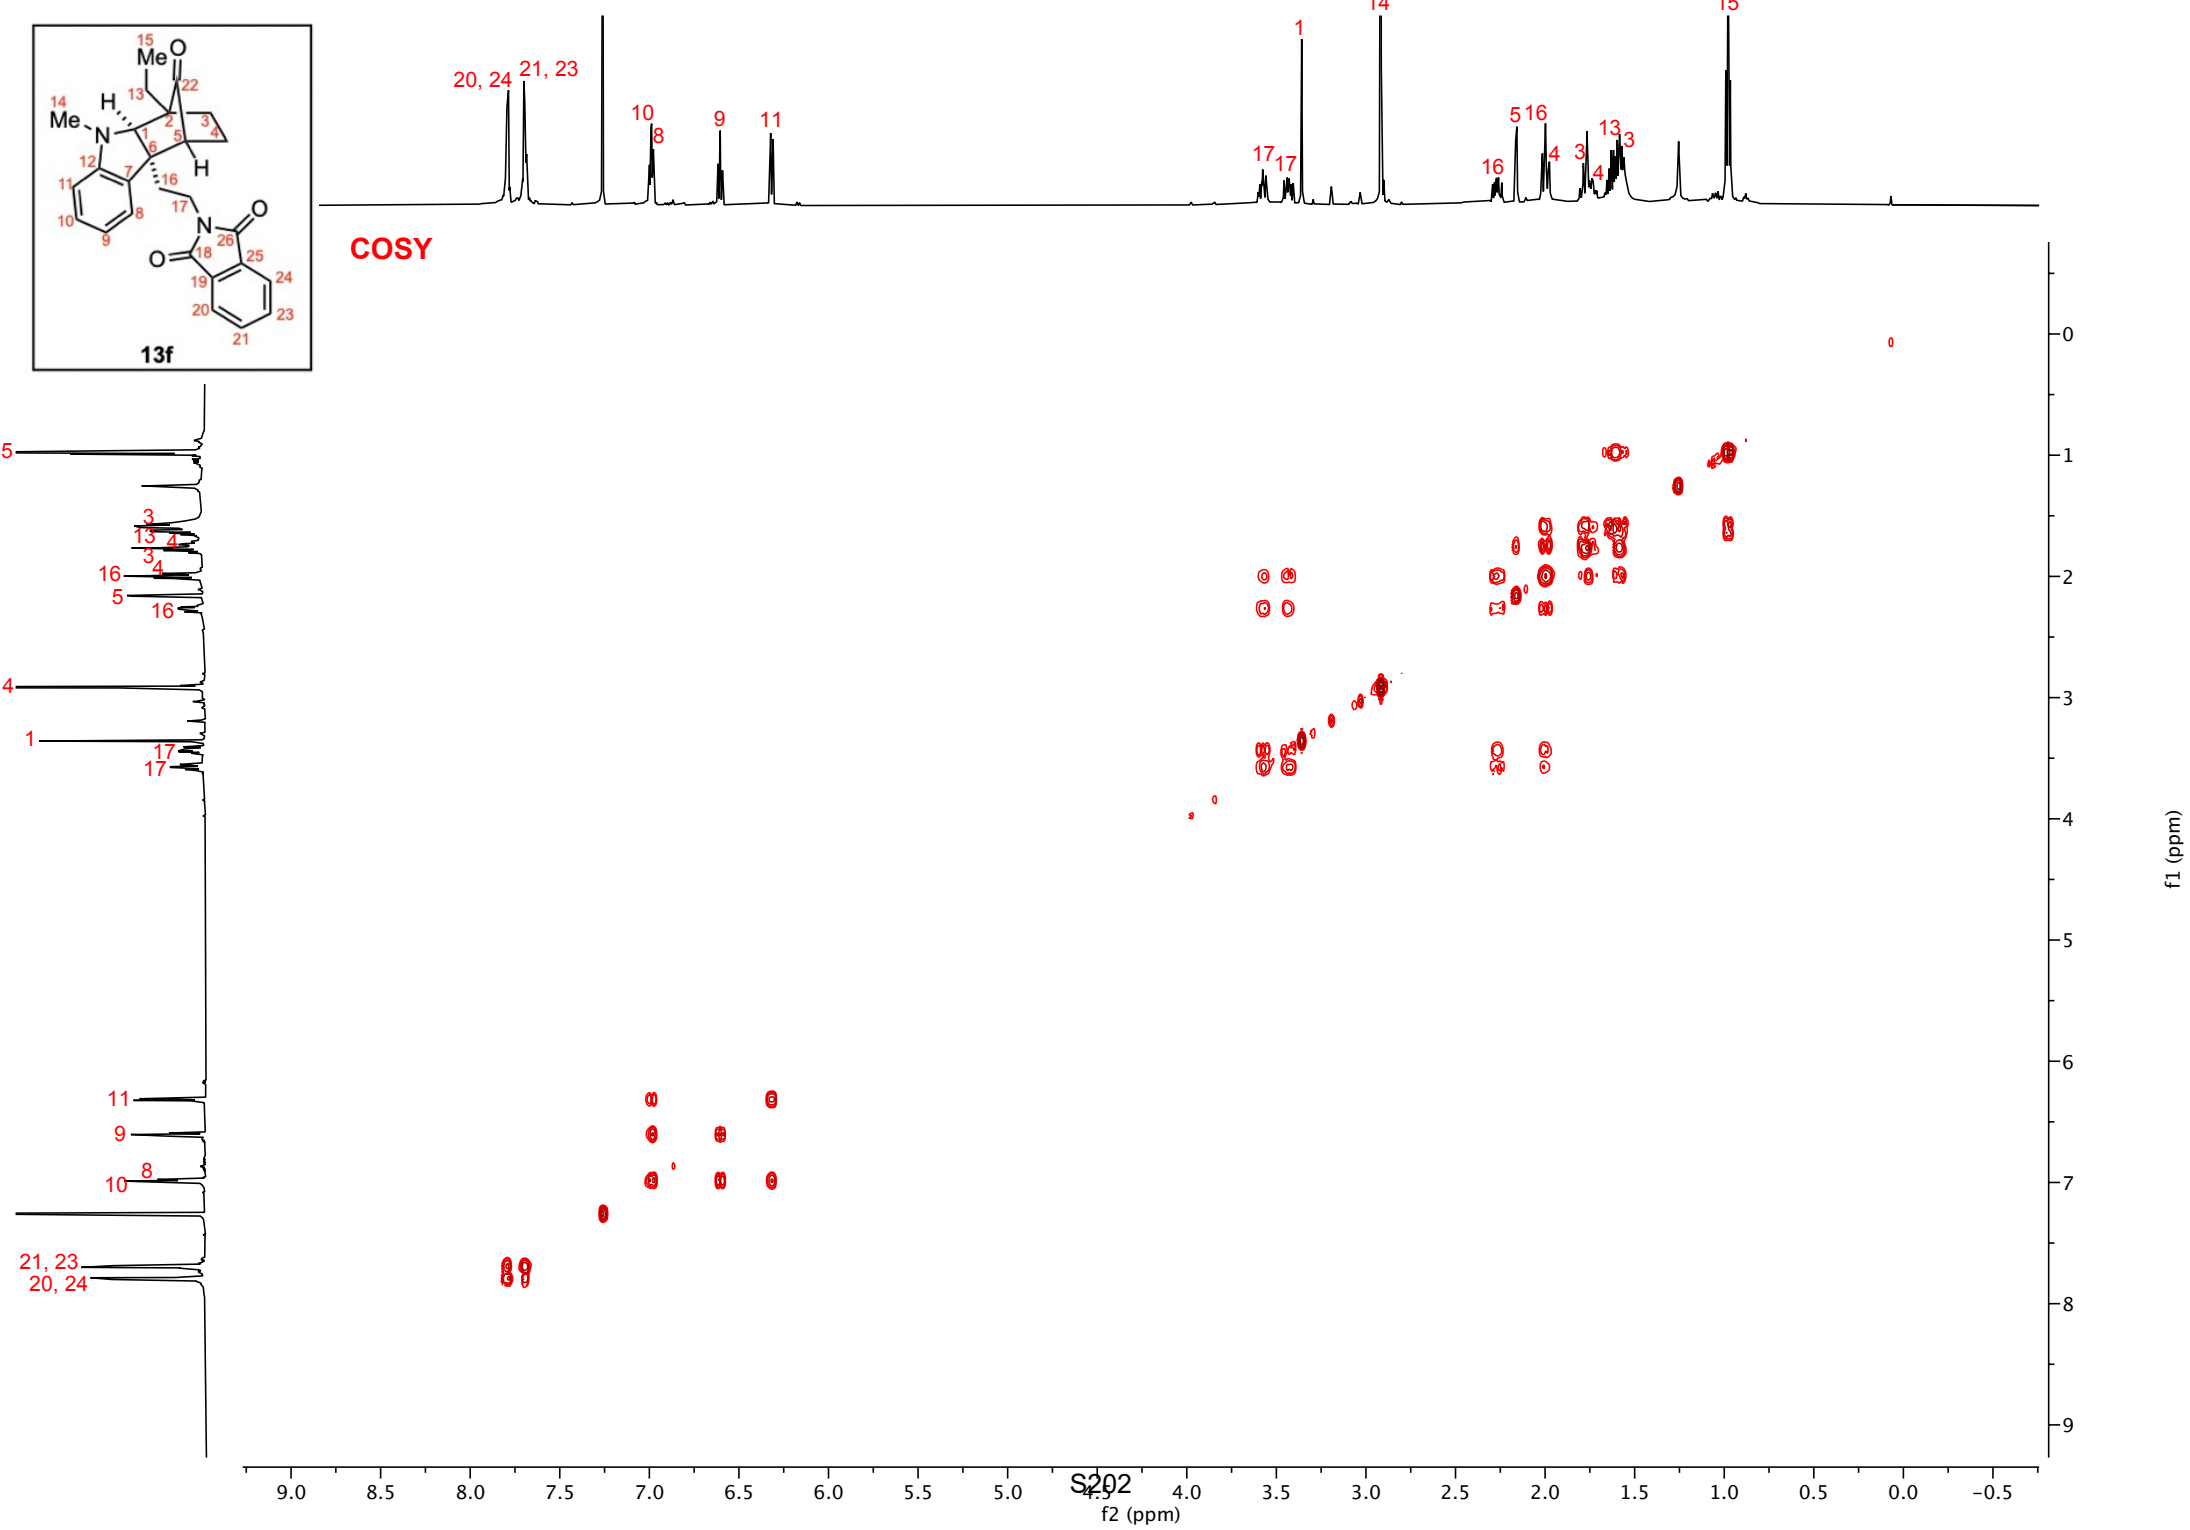

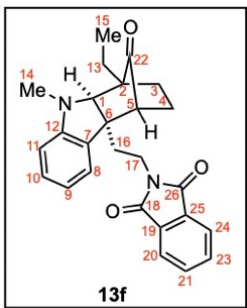

HSQC

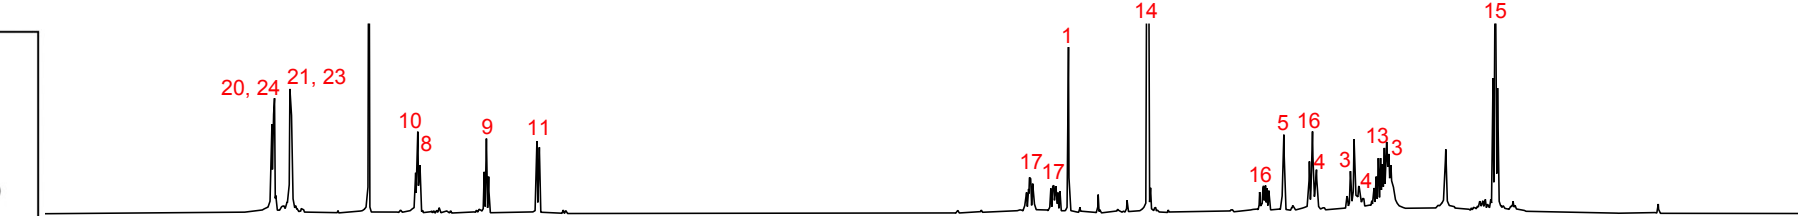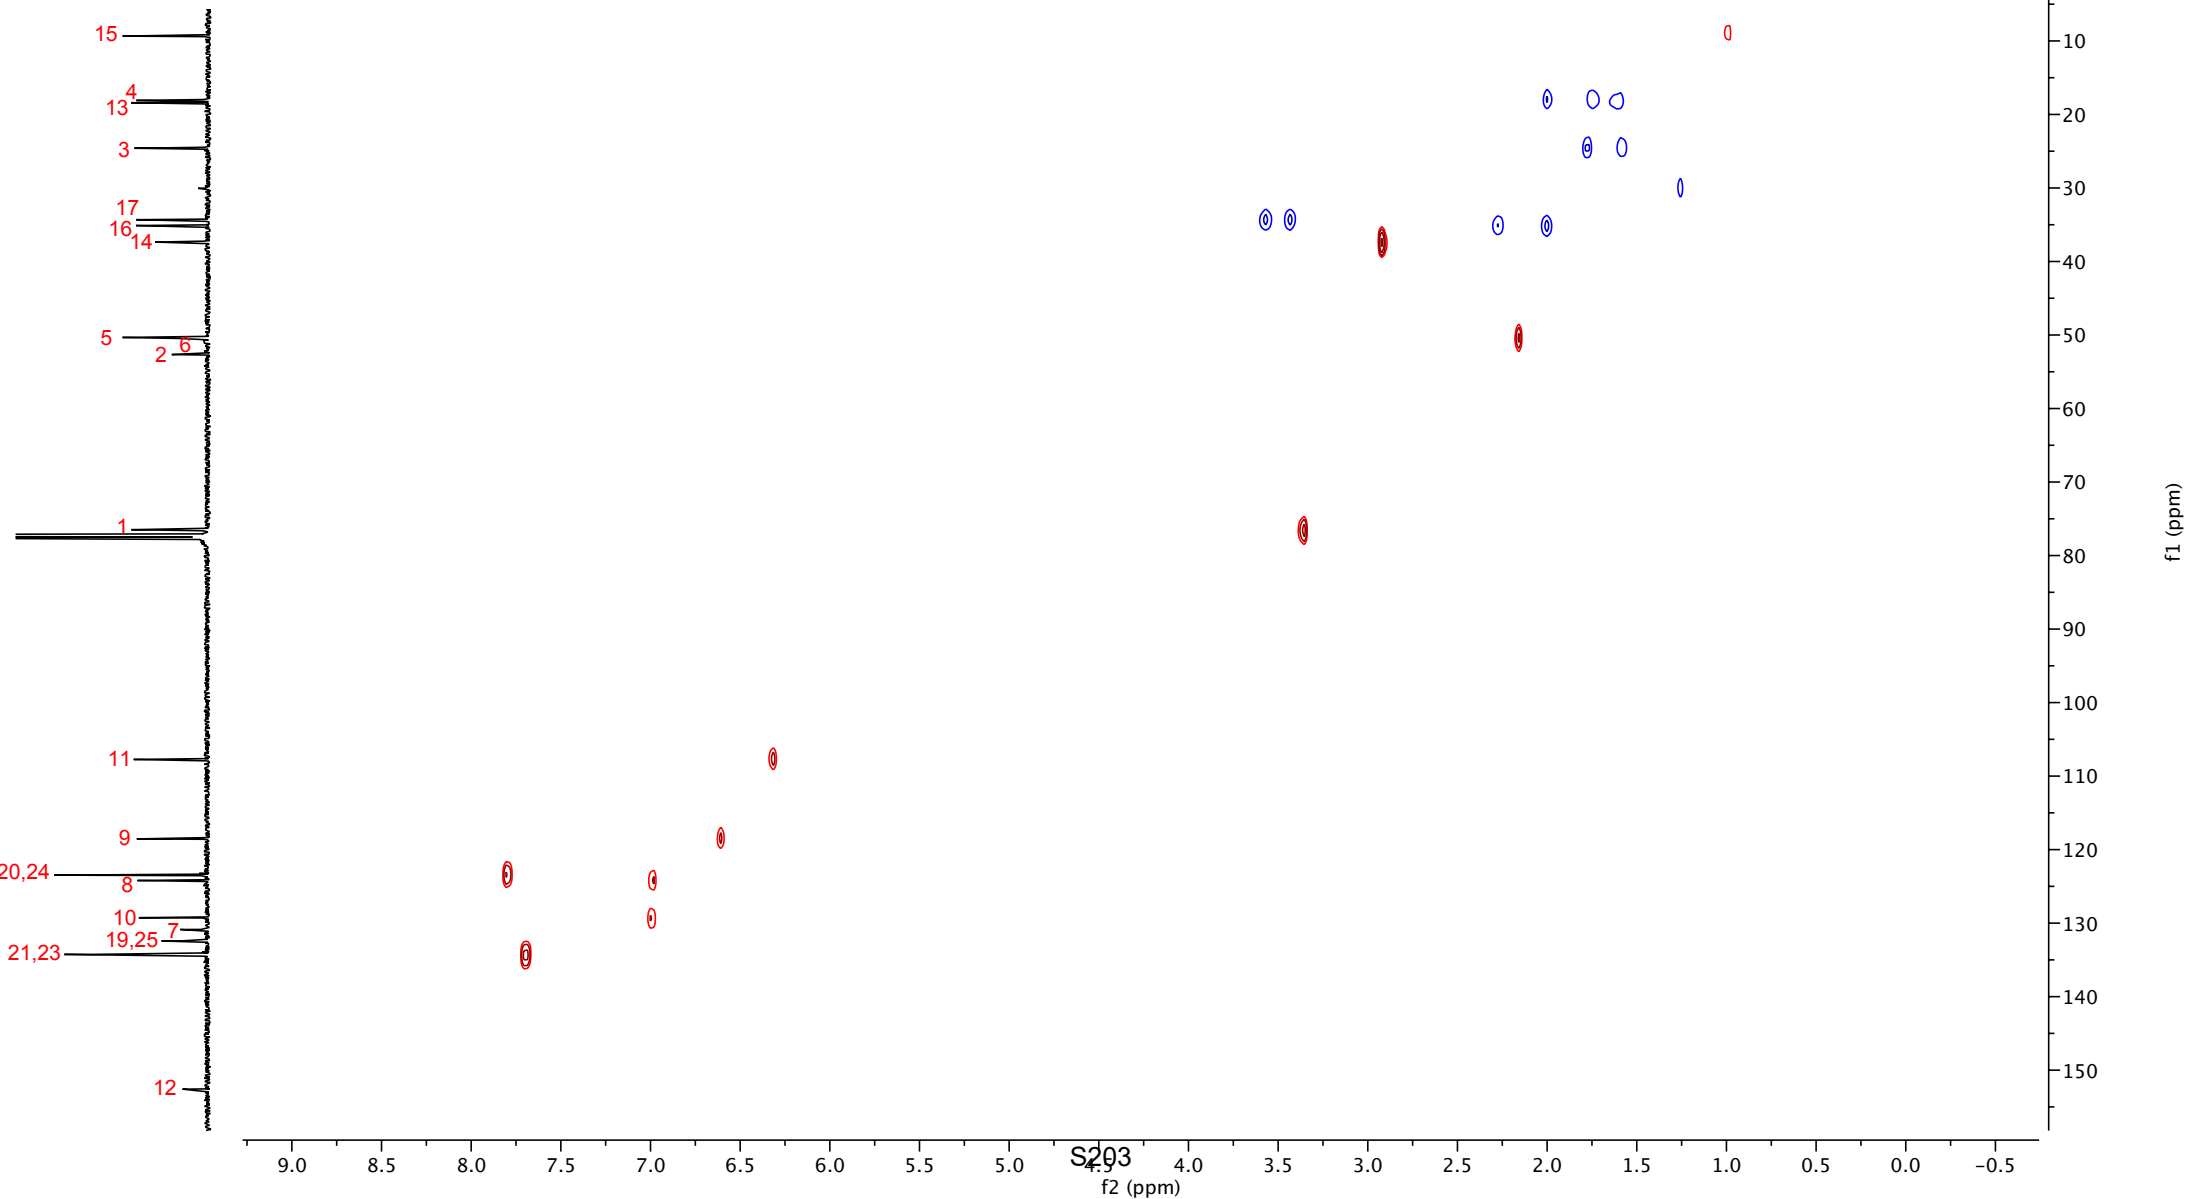

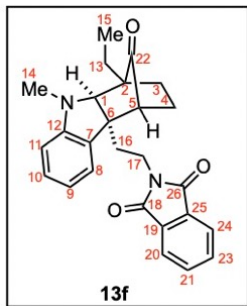

**HMBC**

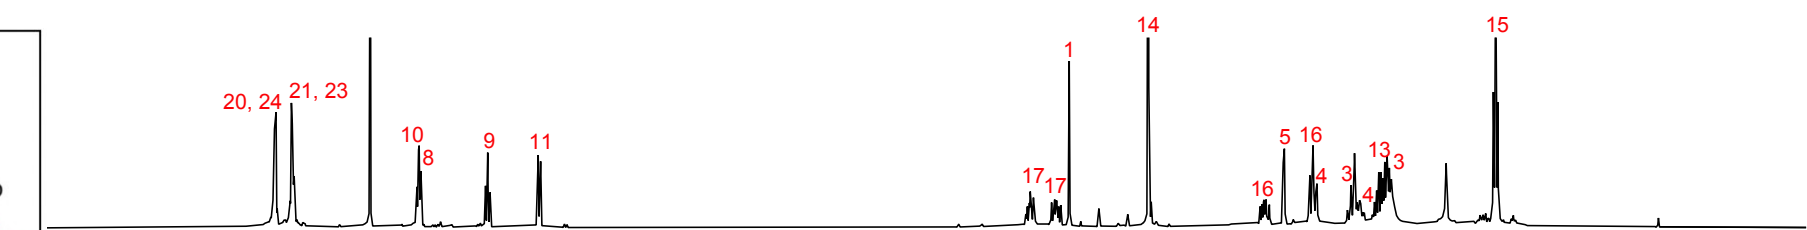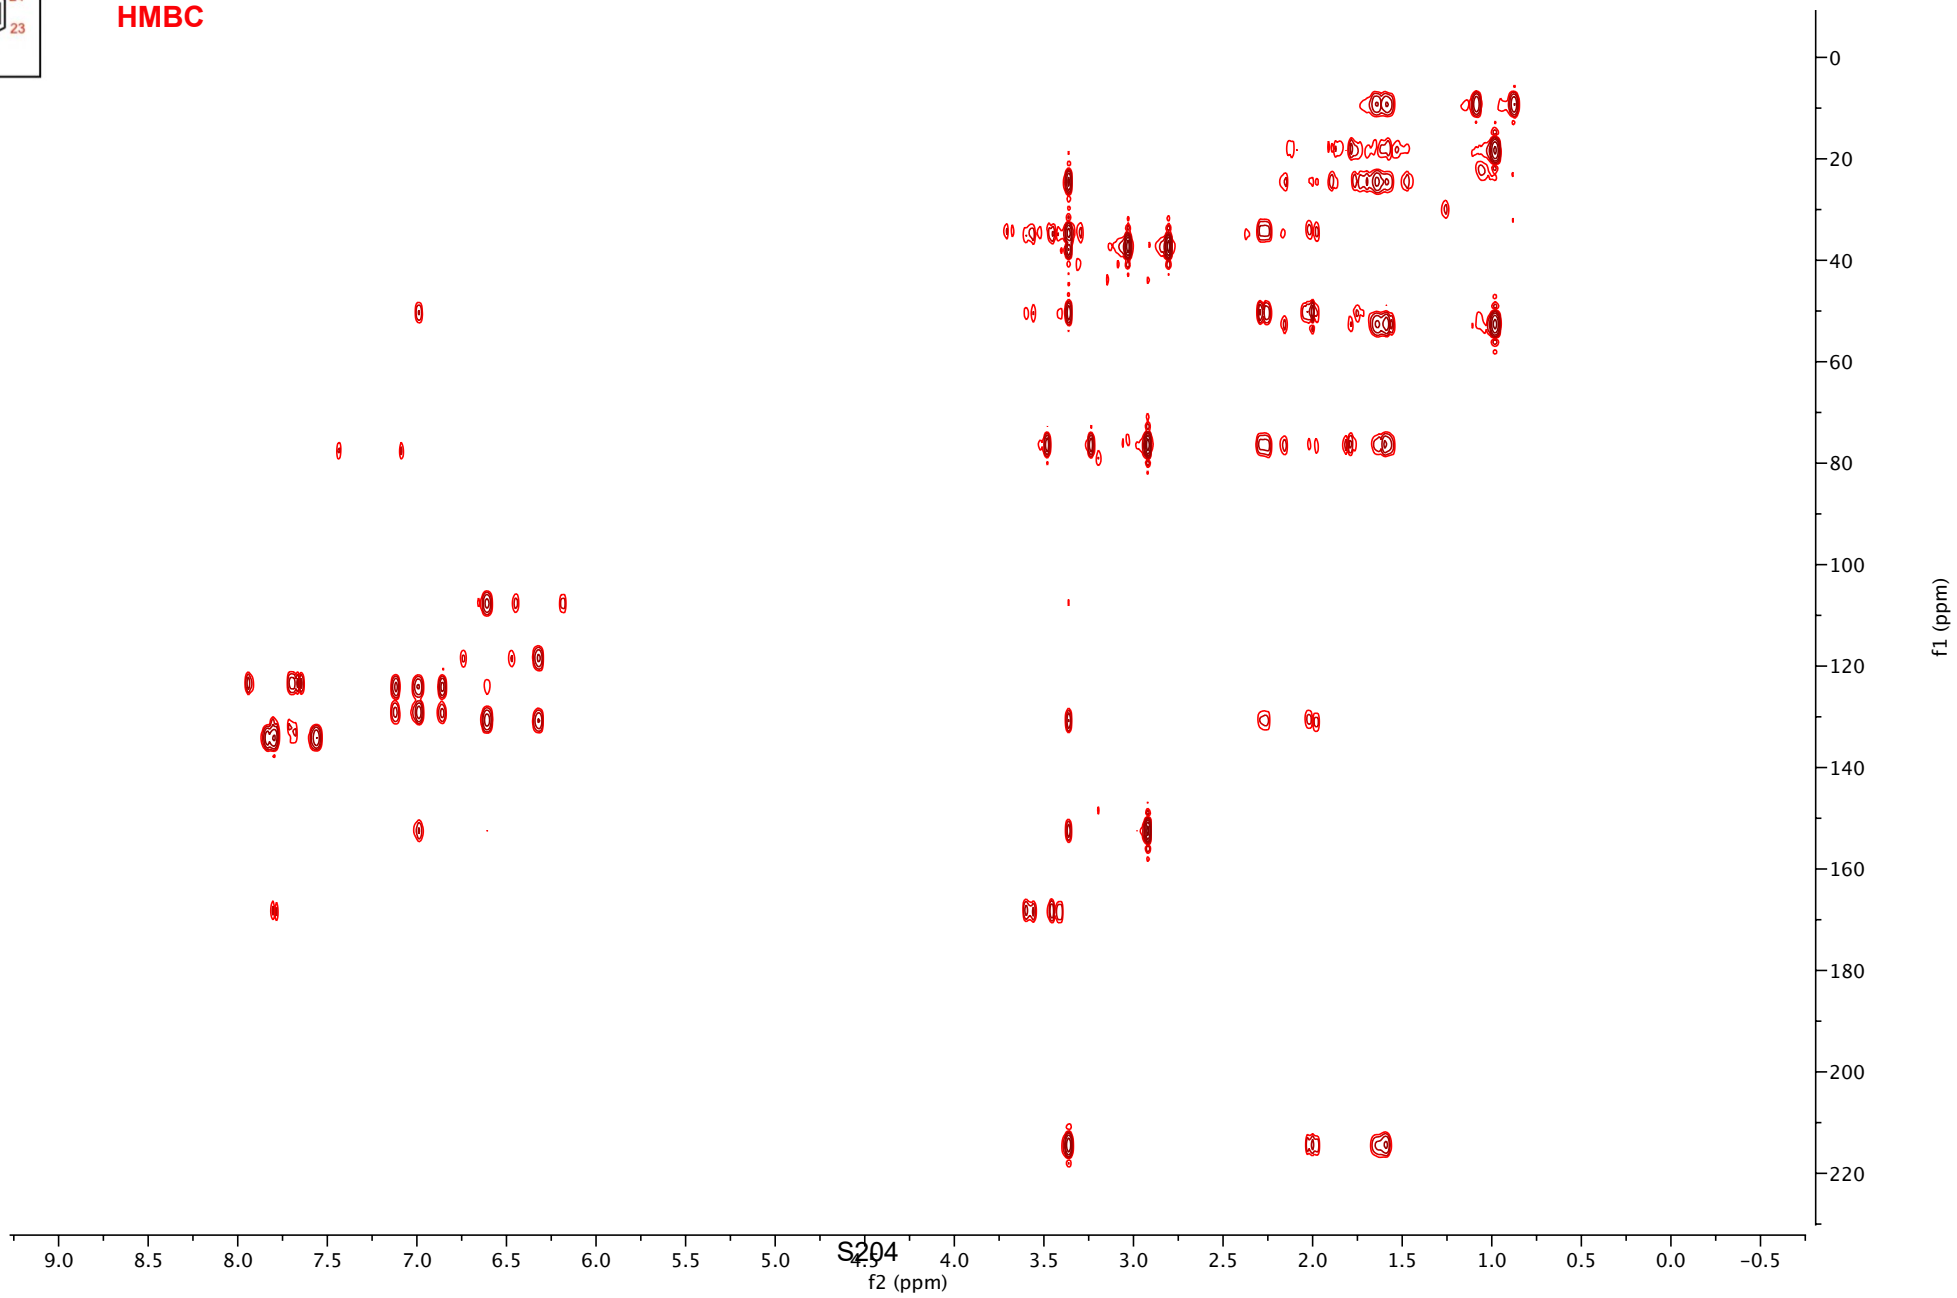

7.72  
7.71  
7.71  
7.65  
7.65  
7.64  
7.64  
6.94  
6.93  
6.92  
6.91  
6.87  
6.87  
6.86  
6.86  
6.51  
6.51  
6.49  
6.49  
6.48  
6.48  
6.37  
6.36

3.94  
3.94  
3.54  
3.52  
3.51  
3.51  
3.50  
3.50  
3.49  
3.49  
3.48  
3.48  
3.47  
3.46  
2.92

2.37  
2.35  
2.34  
2.34  
2.33  
2.33  
2.31

1.60  
1.59  
1.59  
1.58  
1.57  
1.57  
1.56  
1.55  
1.55  
1.54  
1.53  
1.49  
1.49  
1.48  
1.48  
1.47  
1.47  
1.46  
1.46  
1.30  
1.29  
1.28  
1.28  
1.27  
1.27  
1.26  
1.26  
1.25  
1.13  
1.11  
1.10

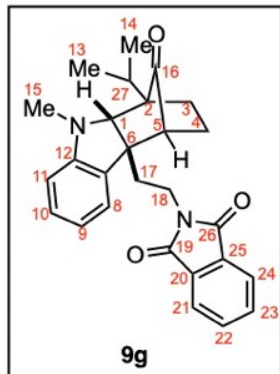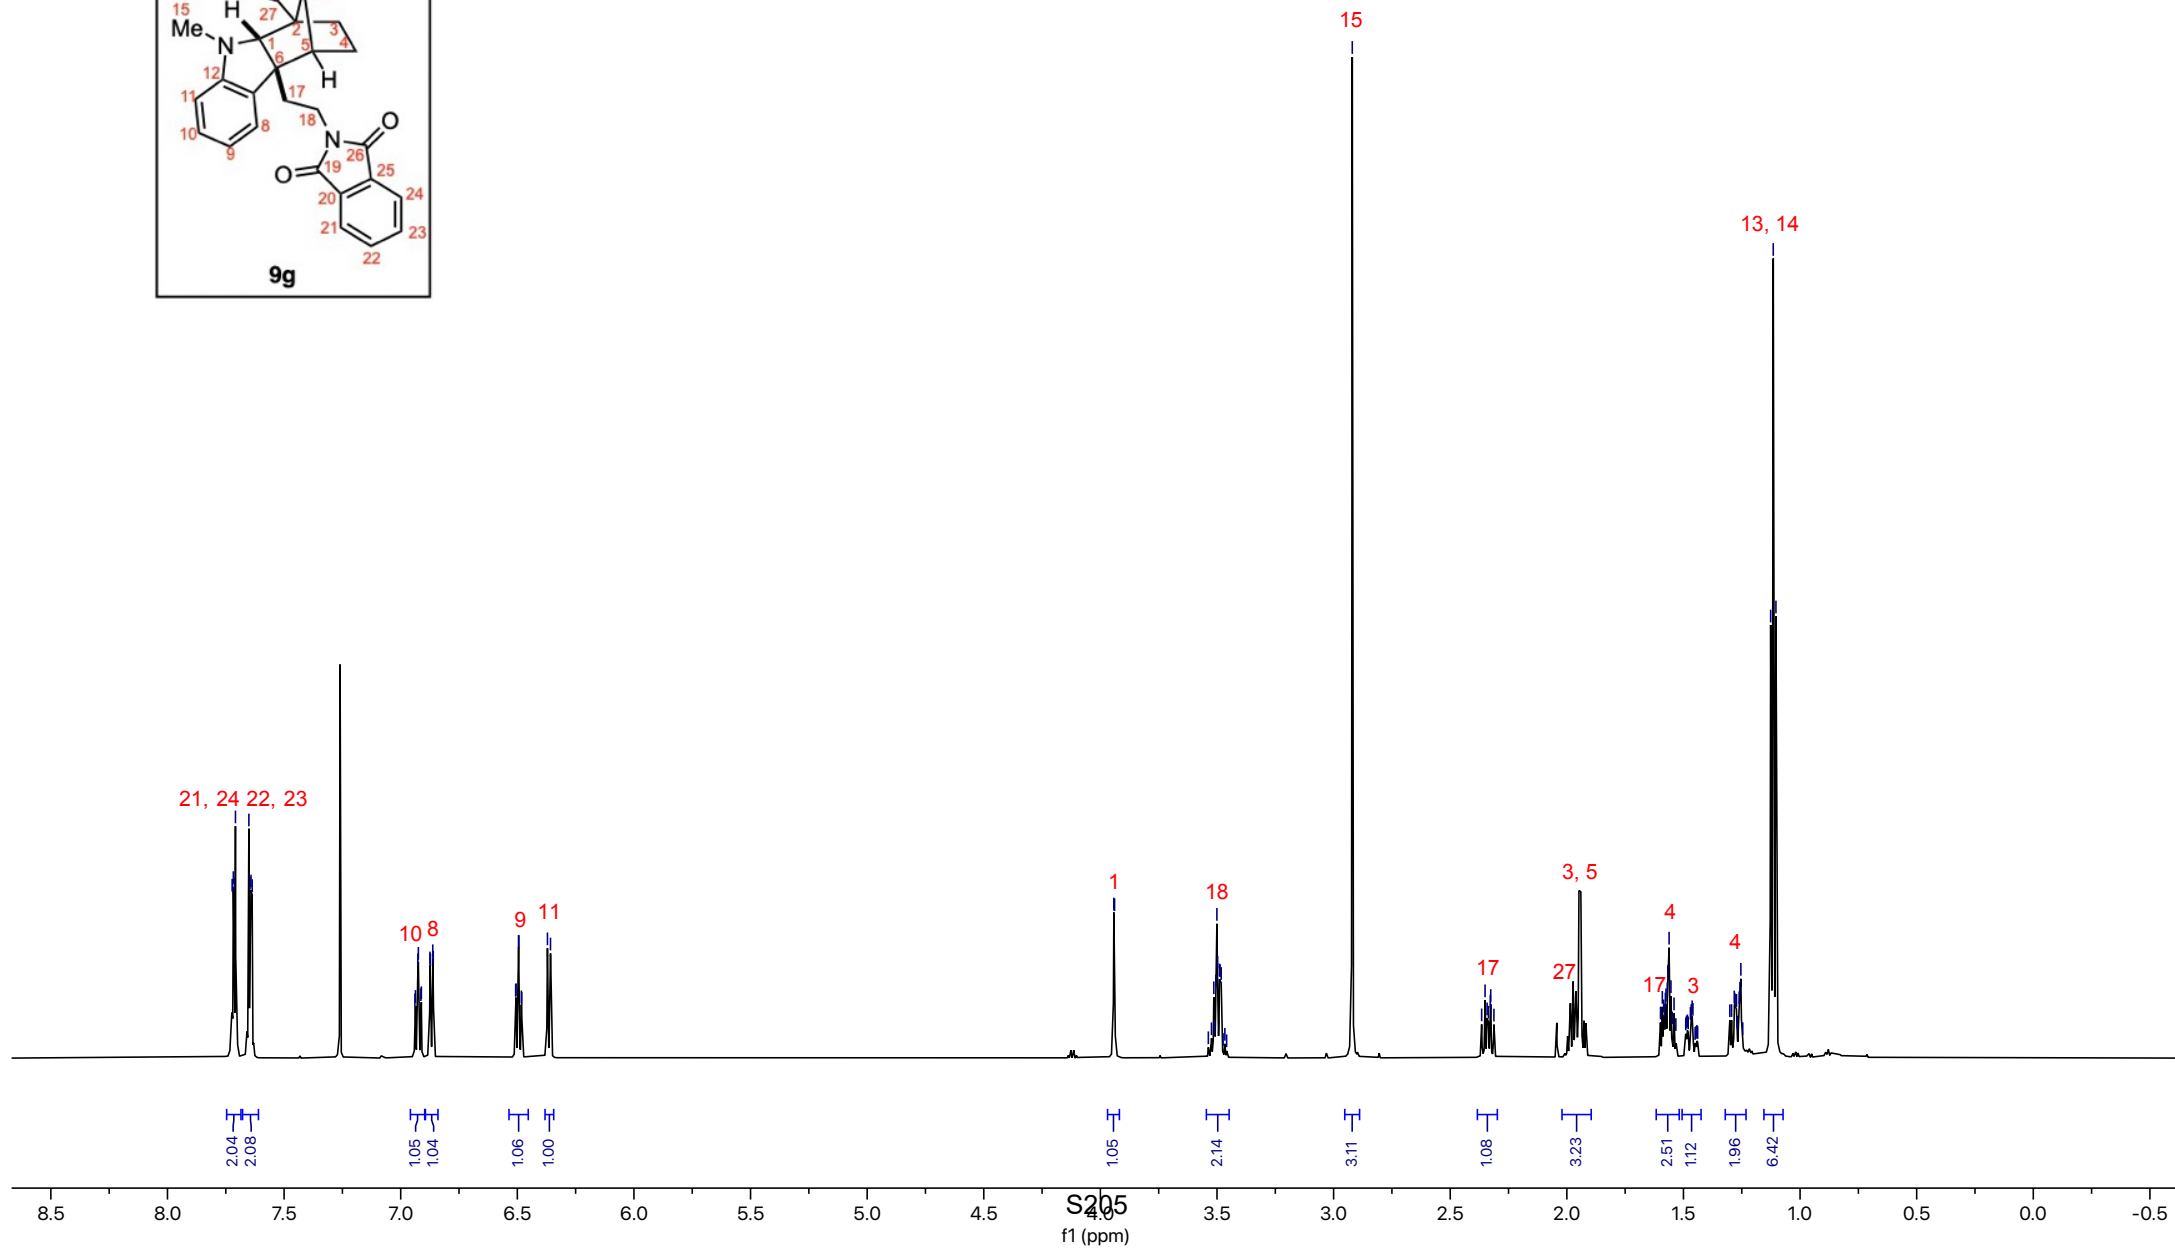

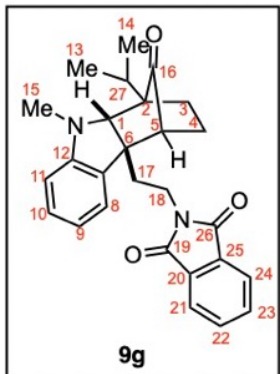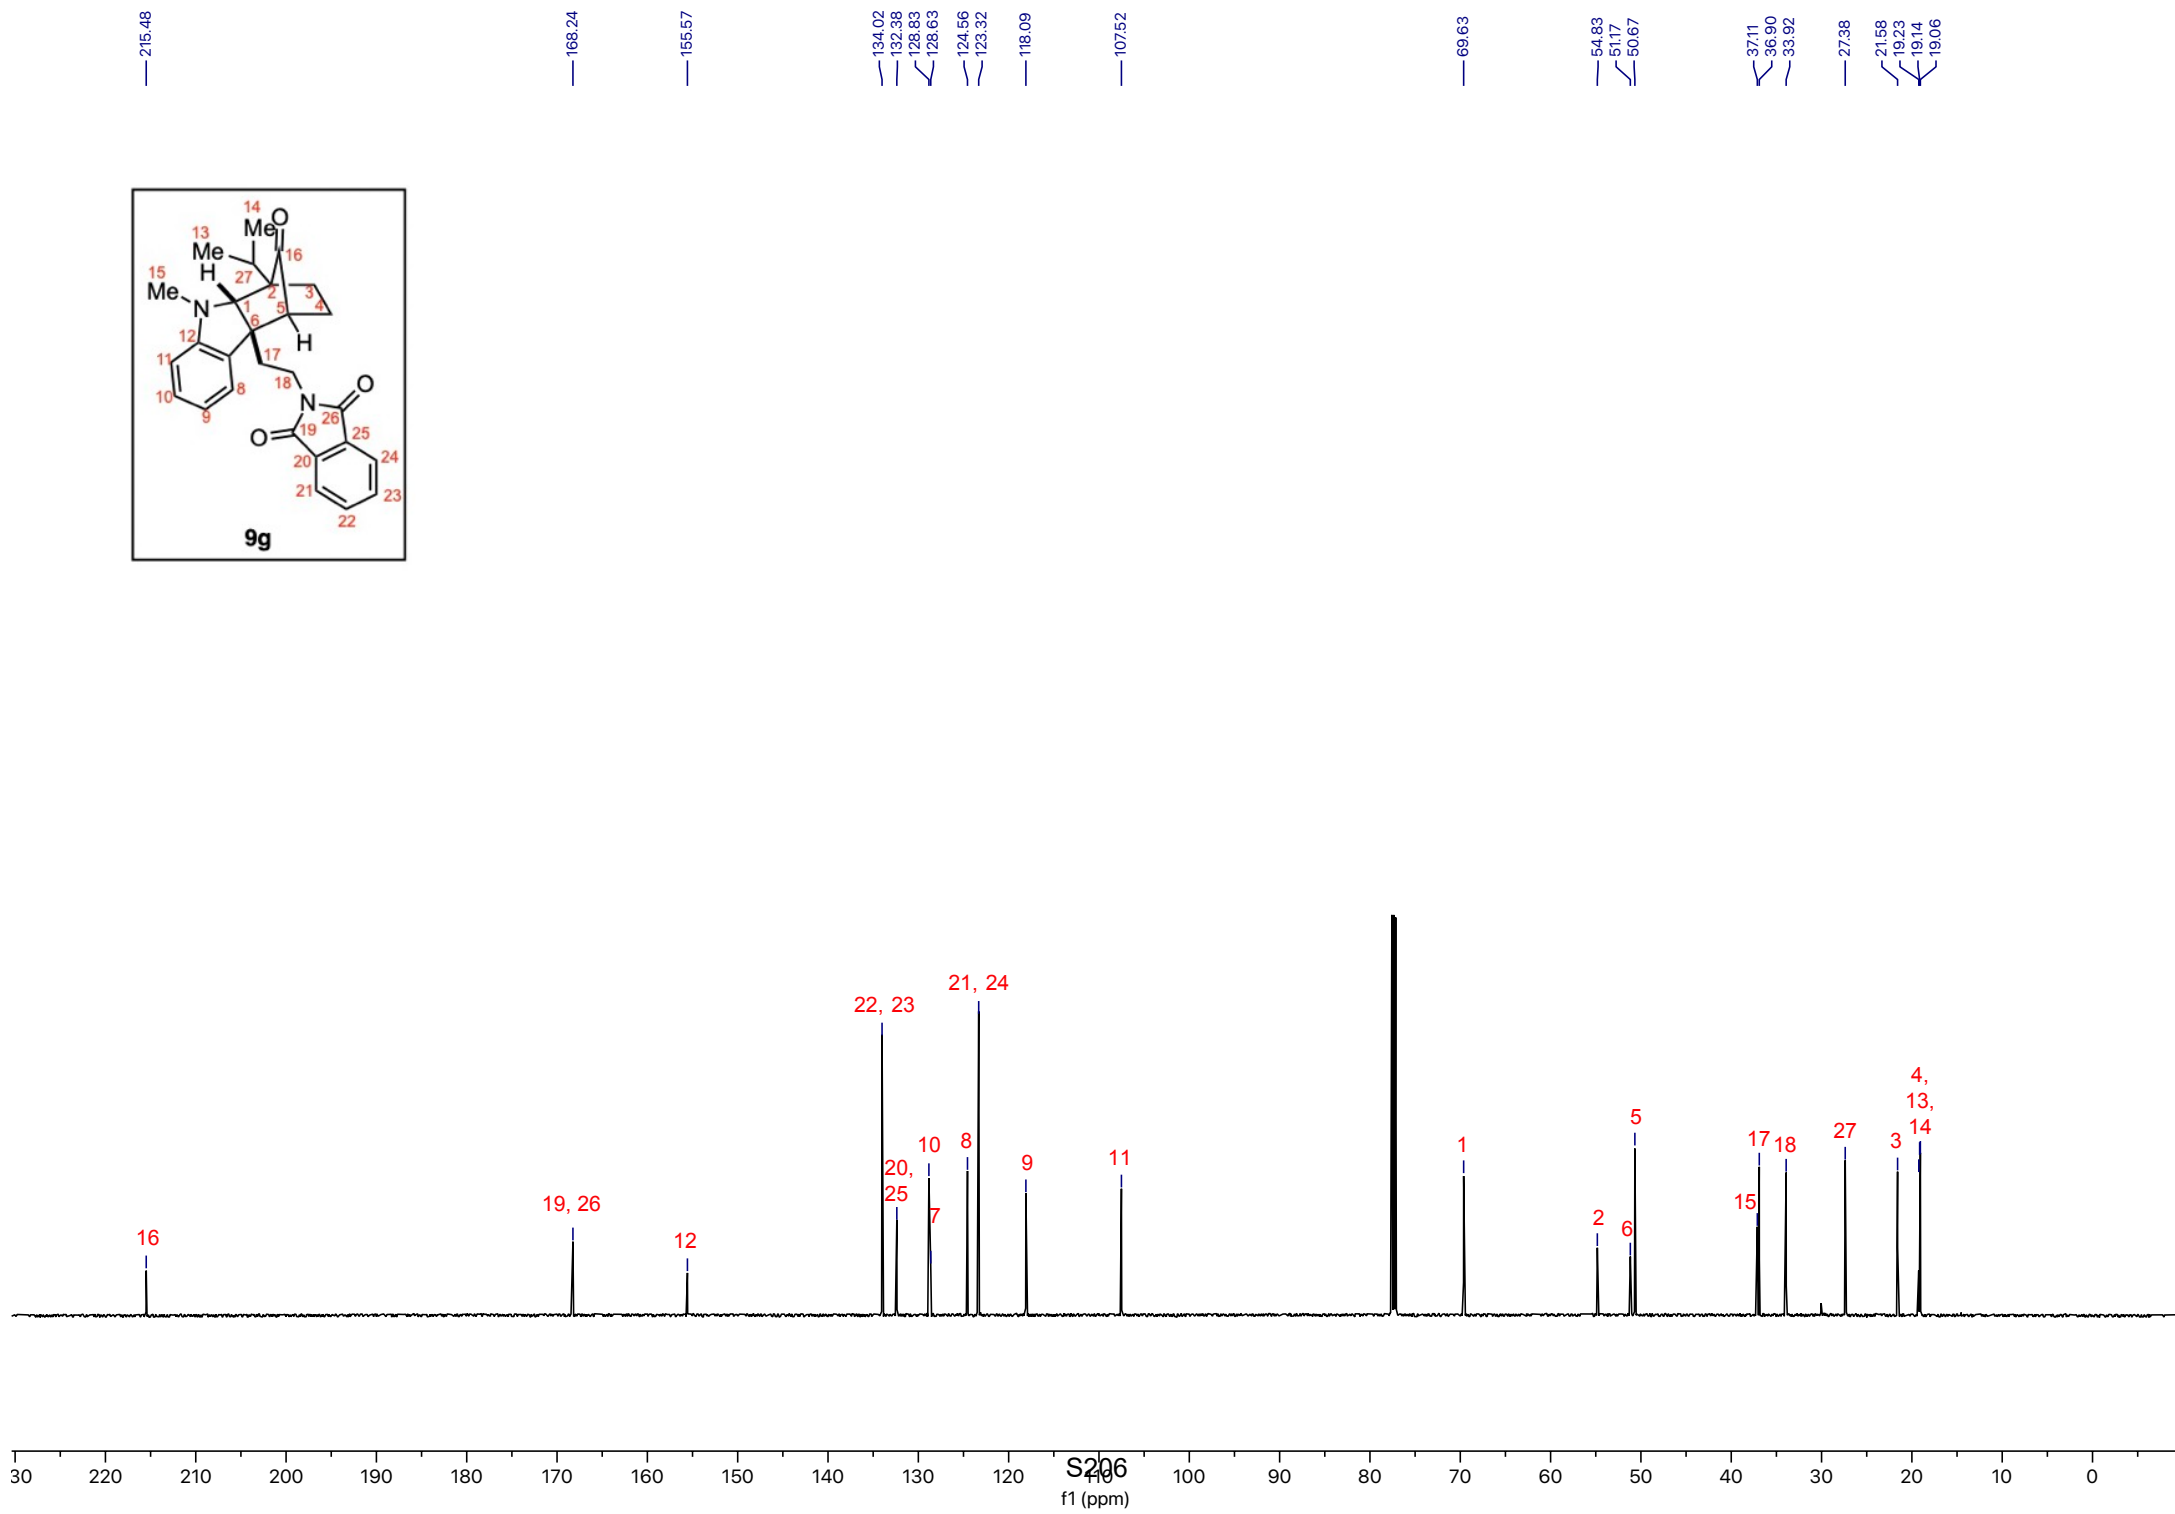

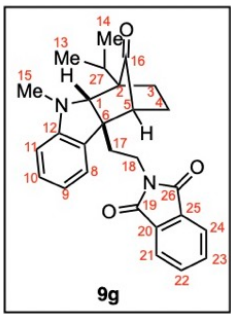

COSY

21, 24 22, 23

108

9 11

1

18

15

17

3, 5

17

4

3

4

13, 14

13, 14

4

3

4

17

3, 5

27

17

15

18

1

11

9

8

10

22, 23

21, 24

8.0

7.5

7.0

6.5

6.0

5.5

5.0

4.5

4.0

207

f2 (ppm)

4.0

3.5

3.0

2.5

2.0

1.5

1.0

0.5

0.5

1.0

1.5

2.0

2.5

3.0

3.5

4.0

4.5

5.0

5.5

6.0

6.5

7.0

f1 (ppm)



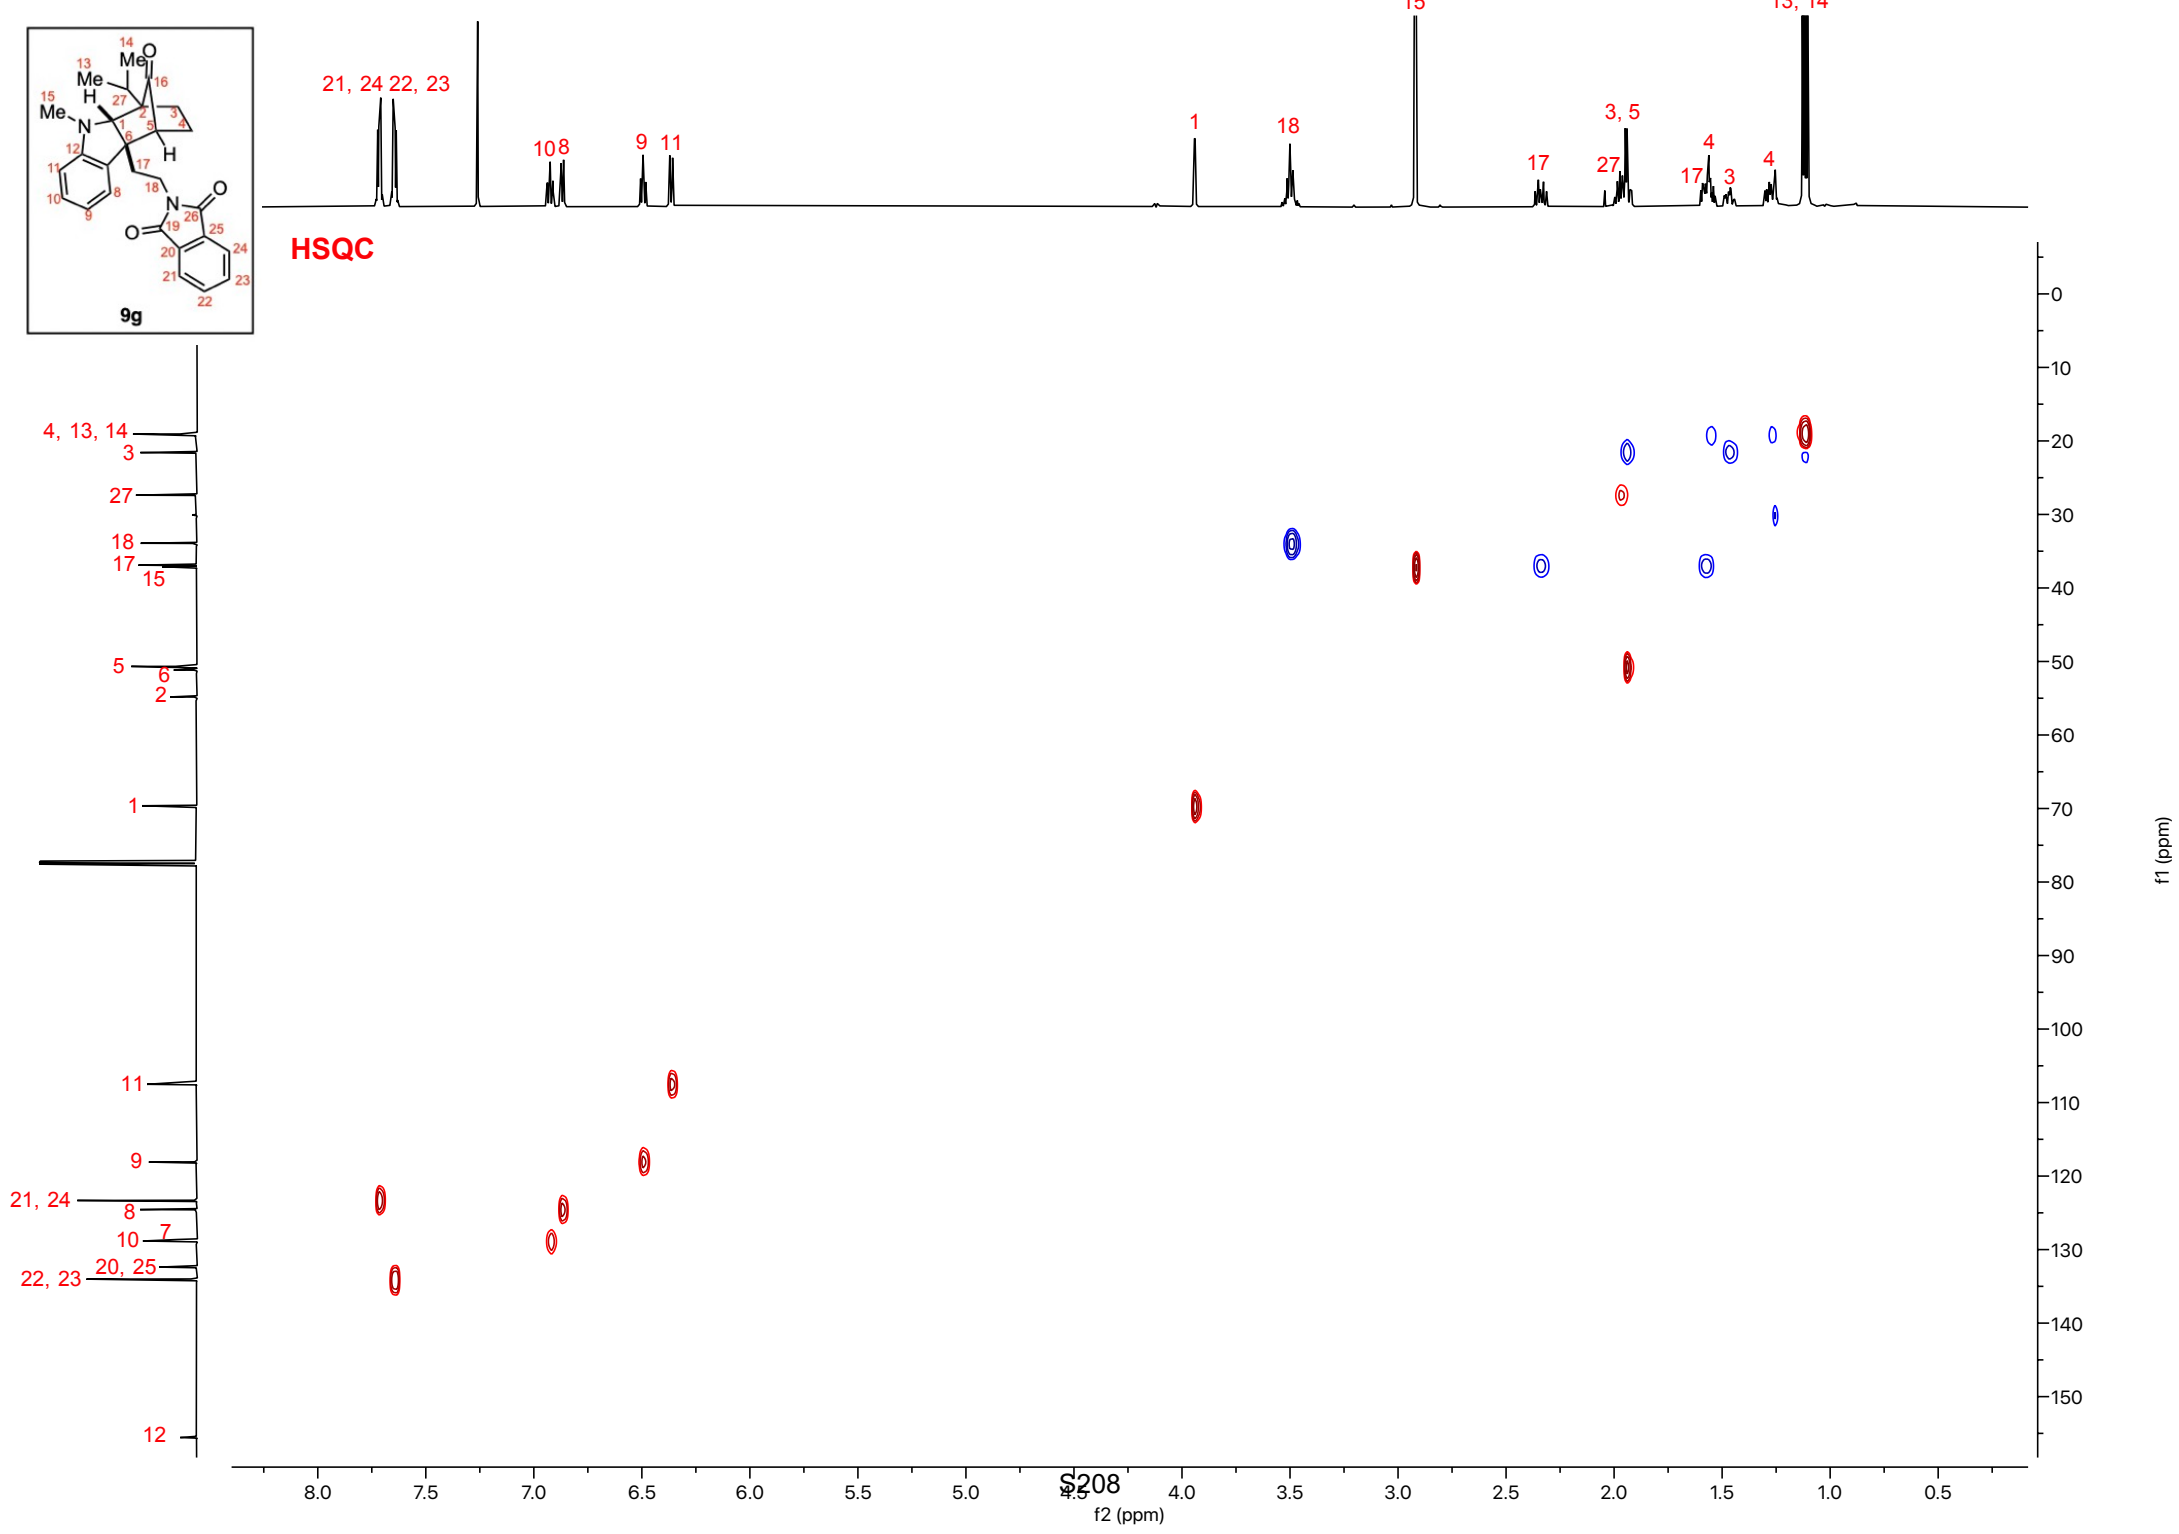



21, 24 22, 23

108

9 11

1

18

15

17

3, 5

27

4

3

4

13, 14

**HMBC**

- 4, 13, 14
- 3
- 27
- 18
- 17
- 15
- 5
- 6
- 2
- 1
- 11
- 9
- 21, 24
- 8
- 7
- 10
- 22, 23
- 20, 25
- 12
- 19, 26
- 16

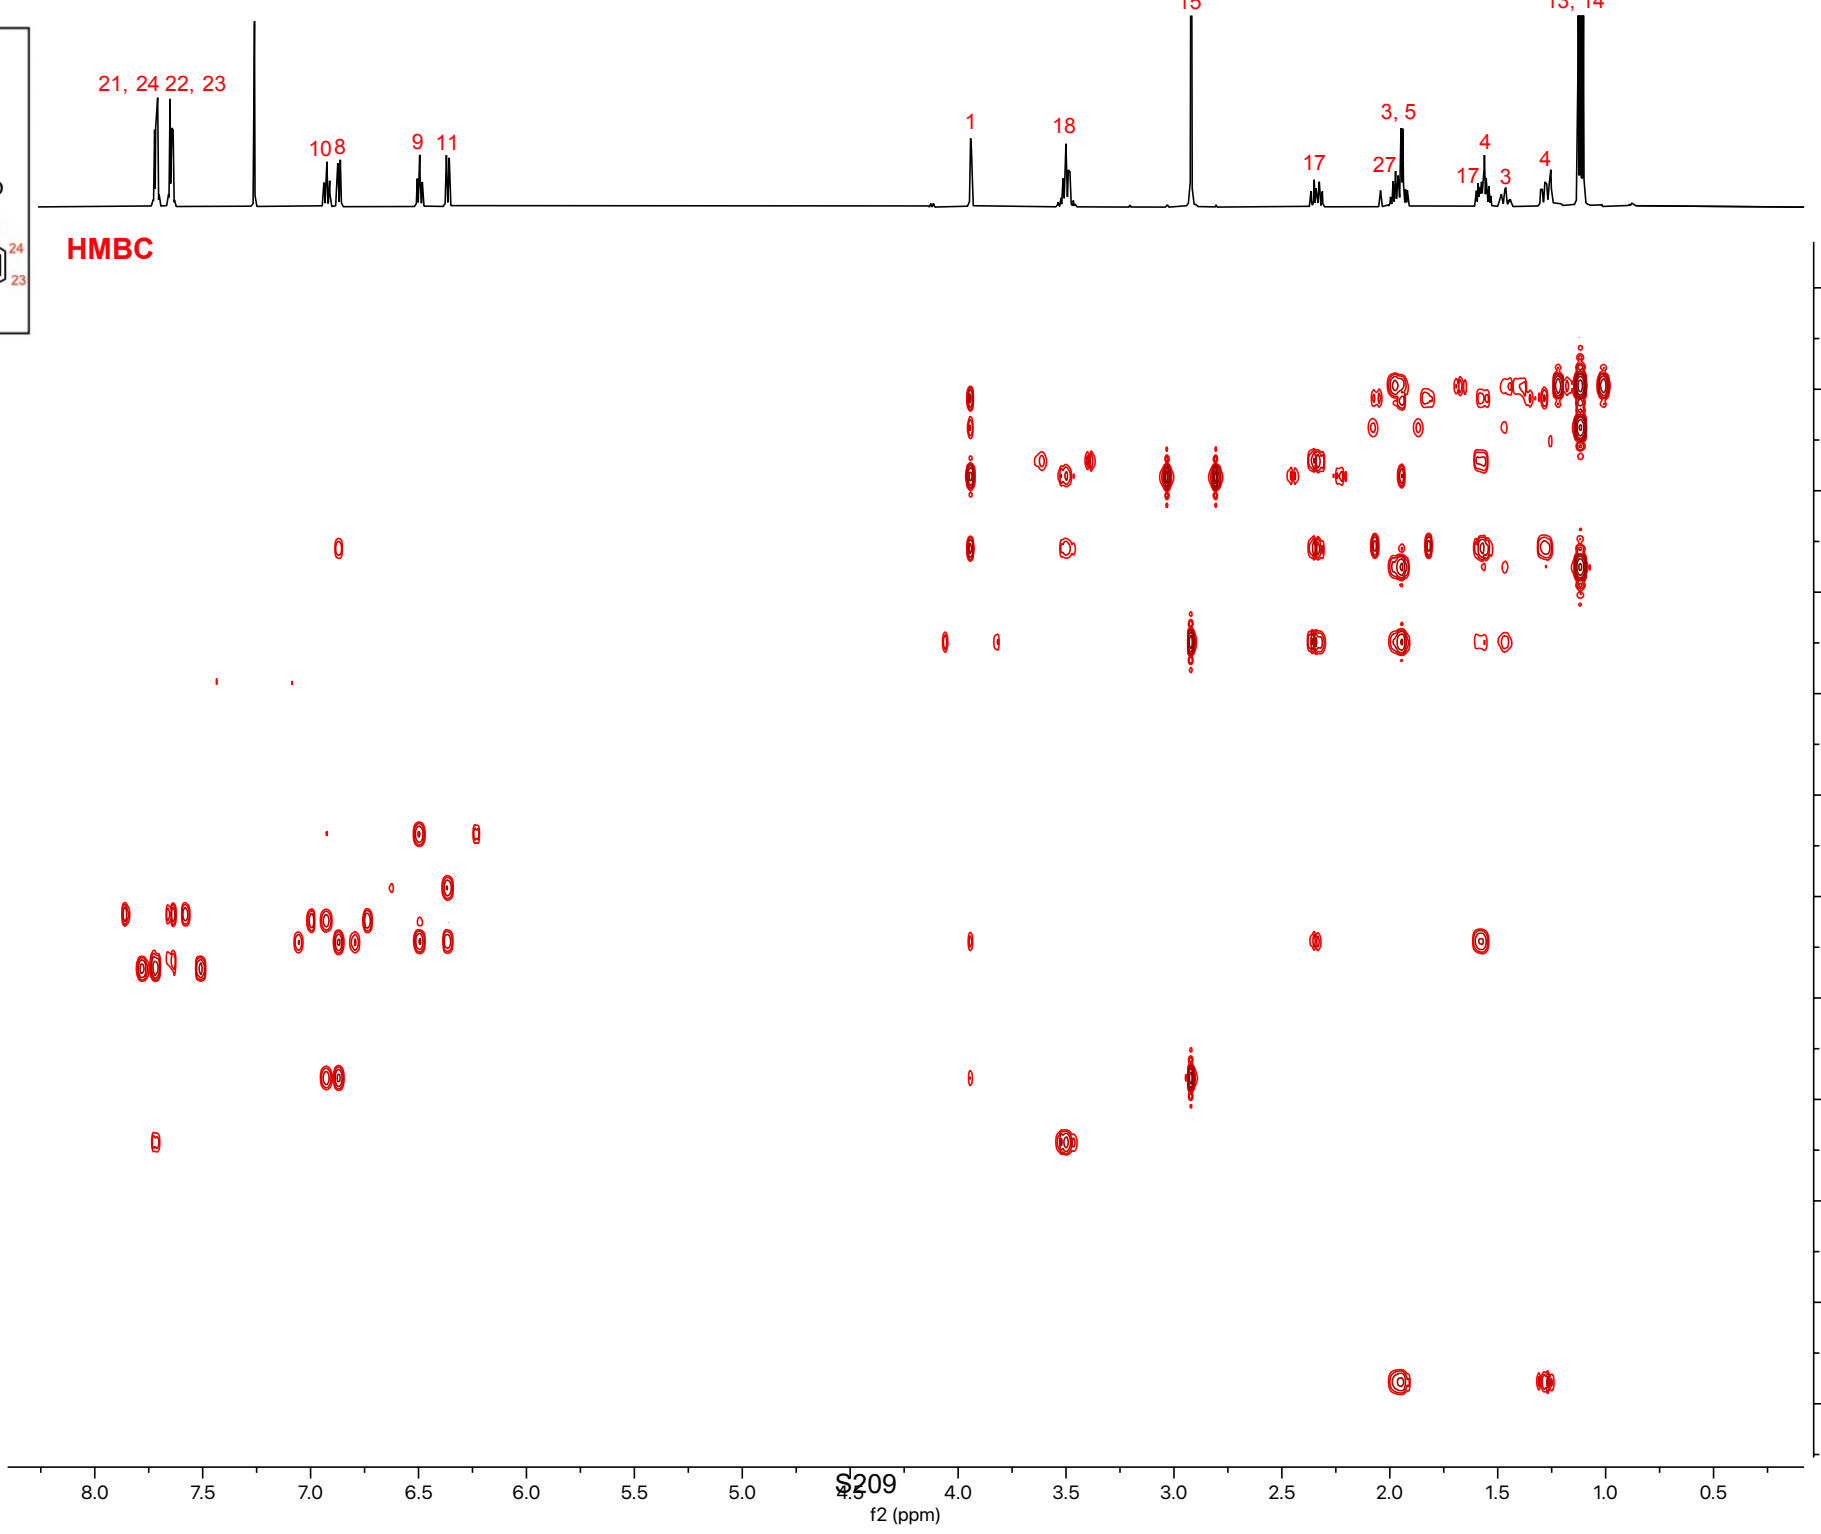

S209

f2 (ppm)

f1 (ppm)

7.80  
7.79  
7.78  
7.77  
7.77  
7.70  
7.69  
7.69  
7.68  
7.00  
6.99  
6.98  
6.97  
6.63  
6.62  
6.61  
6.60  
6.60  
6.36  
6.36  
6.35  
6.35

3.59  
3.58  
3.57  
3.57  
3.56  
3.56  
3.55  
3.54  
3.46  
3.45  
3.44  
3.44  
3.43  
3.43  
3.42  
3.41  
3.39  
2.94

2.30  
2.28  
2.28  
2.27  
2.27  
2.26  
2.26  
2.25  
2.25  
2.24  
2.24  
2.22  
2.21  
2.09  
2.08  
2.02  
2.02  
2.00  
2.00  
1.99  
1.98  
1.98  
1.97  
1.96  
1.95  
1.95  
1.93  
1.93  
1.93  
1.91  
1.91  
1.71  
1.71  
1.70  
1.70  
1.69  
1.69  
1.58  
1.58  
1.02  
1.01  
0.98  
0.98

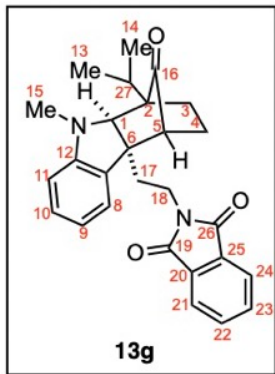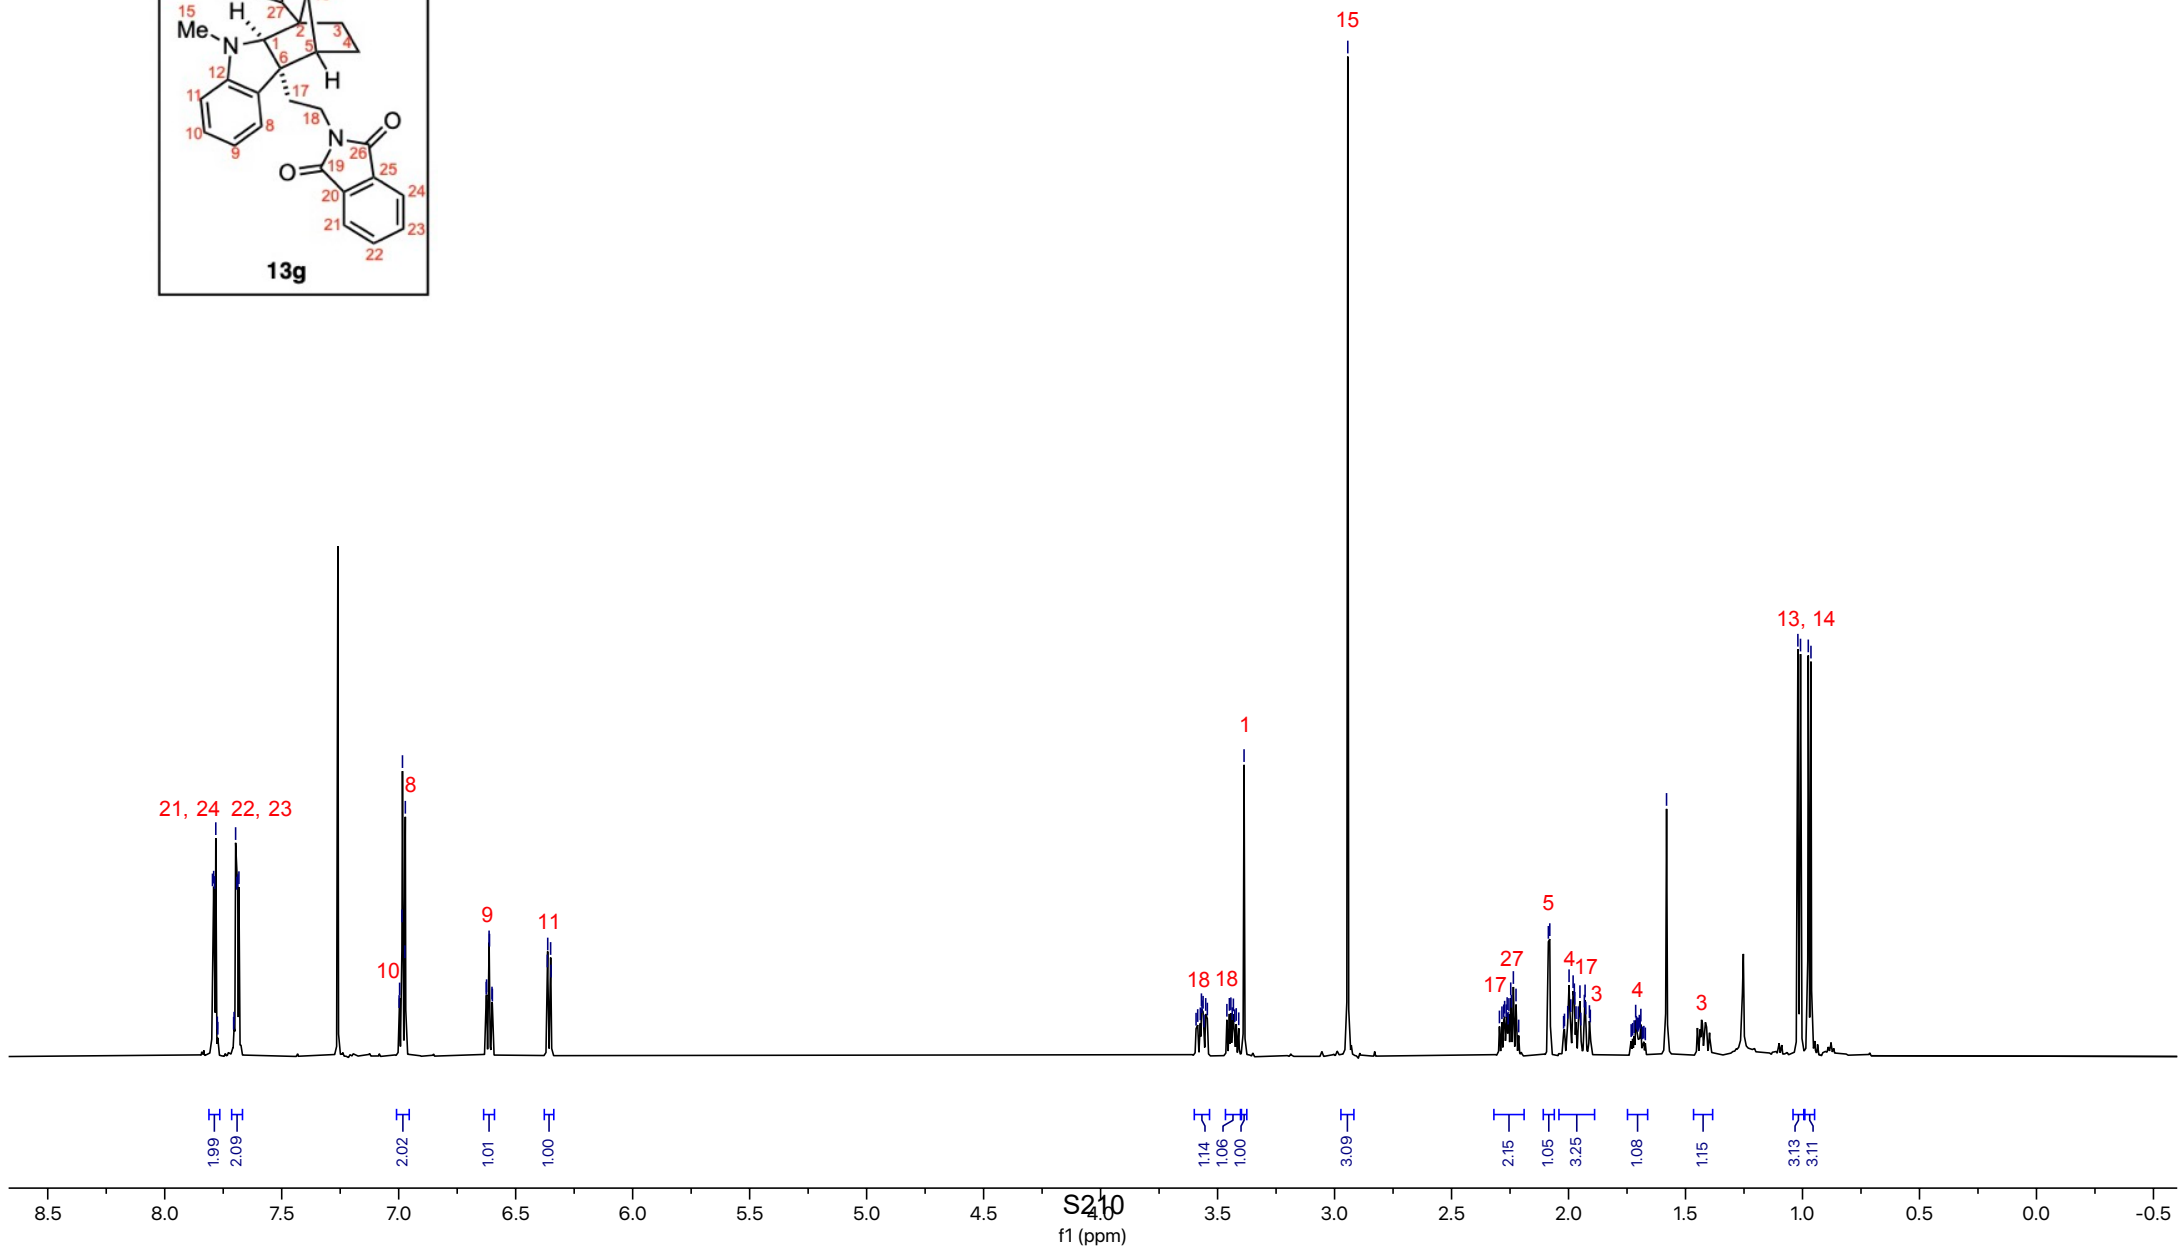

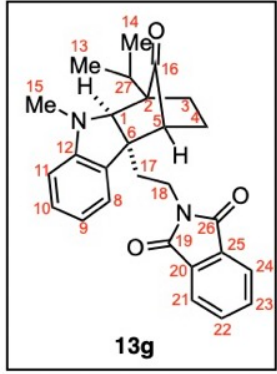

— 213.69

— 168.41

— 153.18

— 134.25

— 132.41

— 130.95

— 129.15

— 124.12

— 123.46

— 118.82

— 108.33

— 76.52

— 55.76

— 50.98

— 50.11

— 38.33

— 35.07

— 34.27

— 30.04

— 23.36

— 20.63

— 19.41

— 18.08

— 16.91

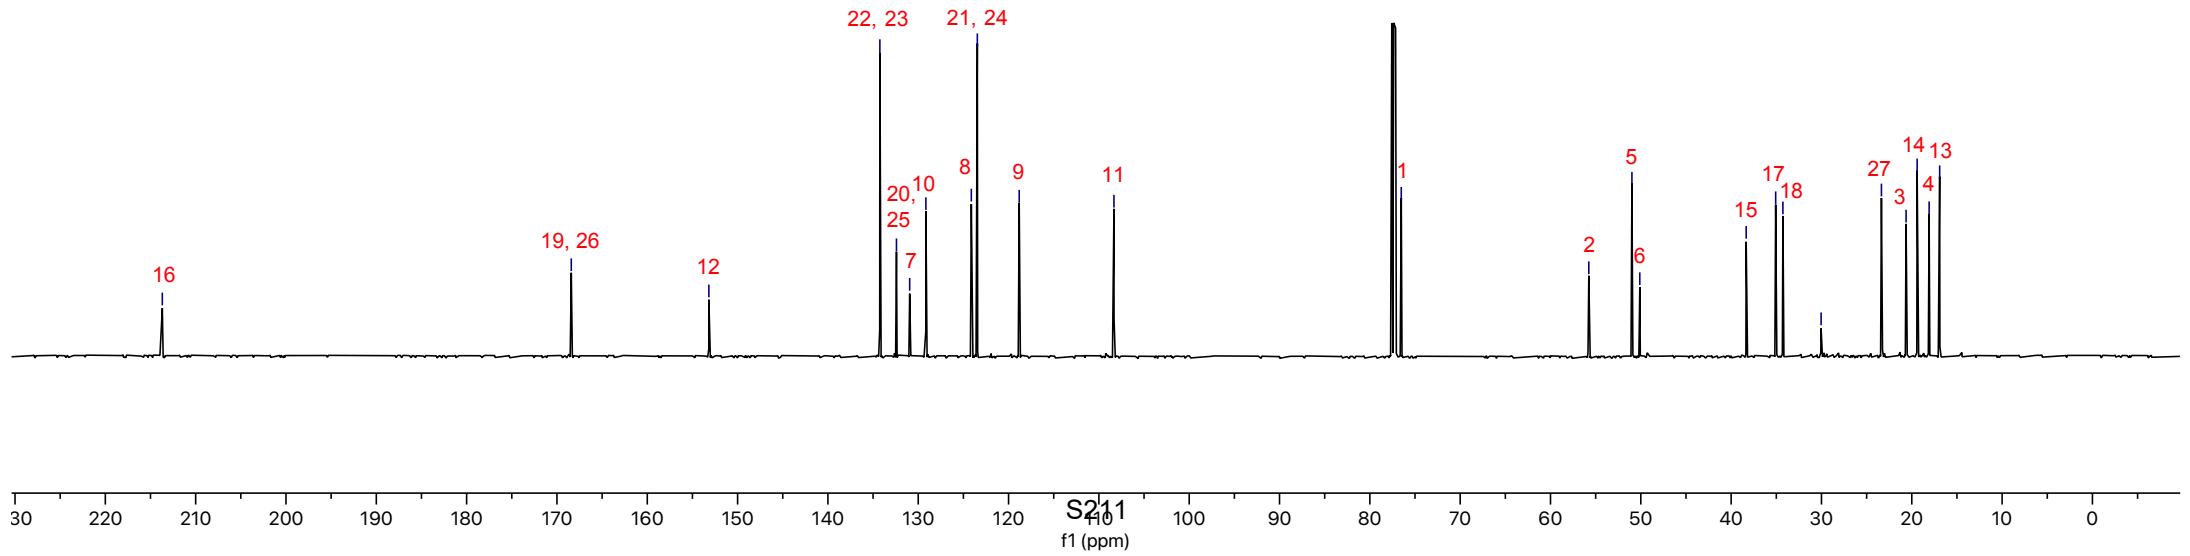

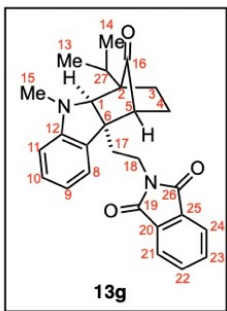

**COSY**

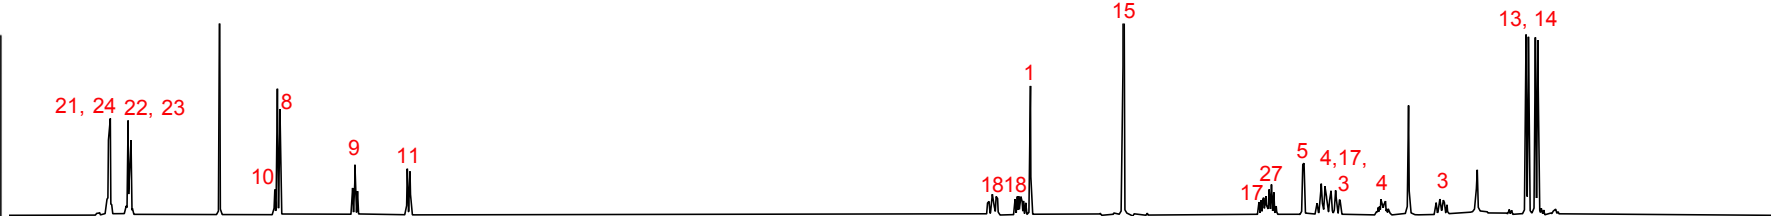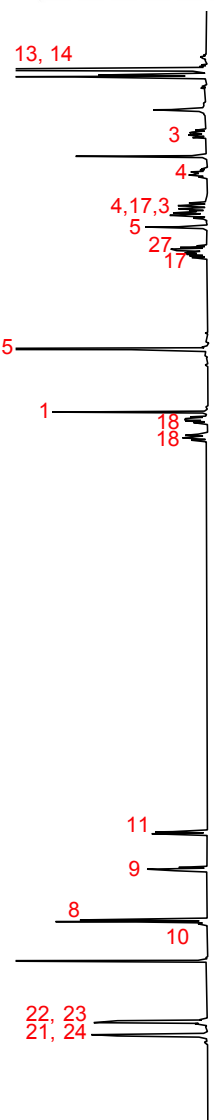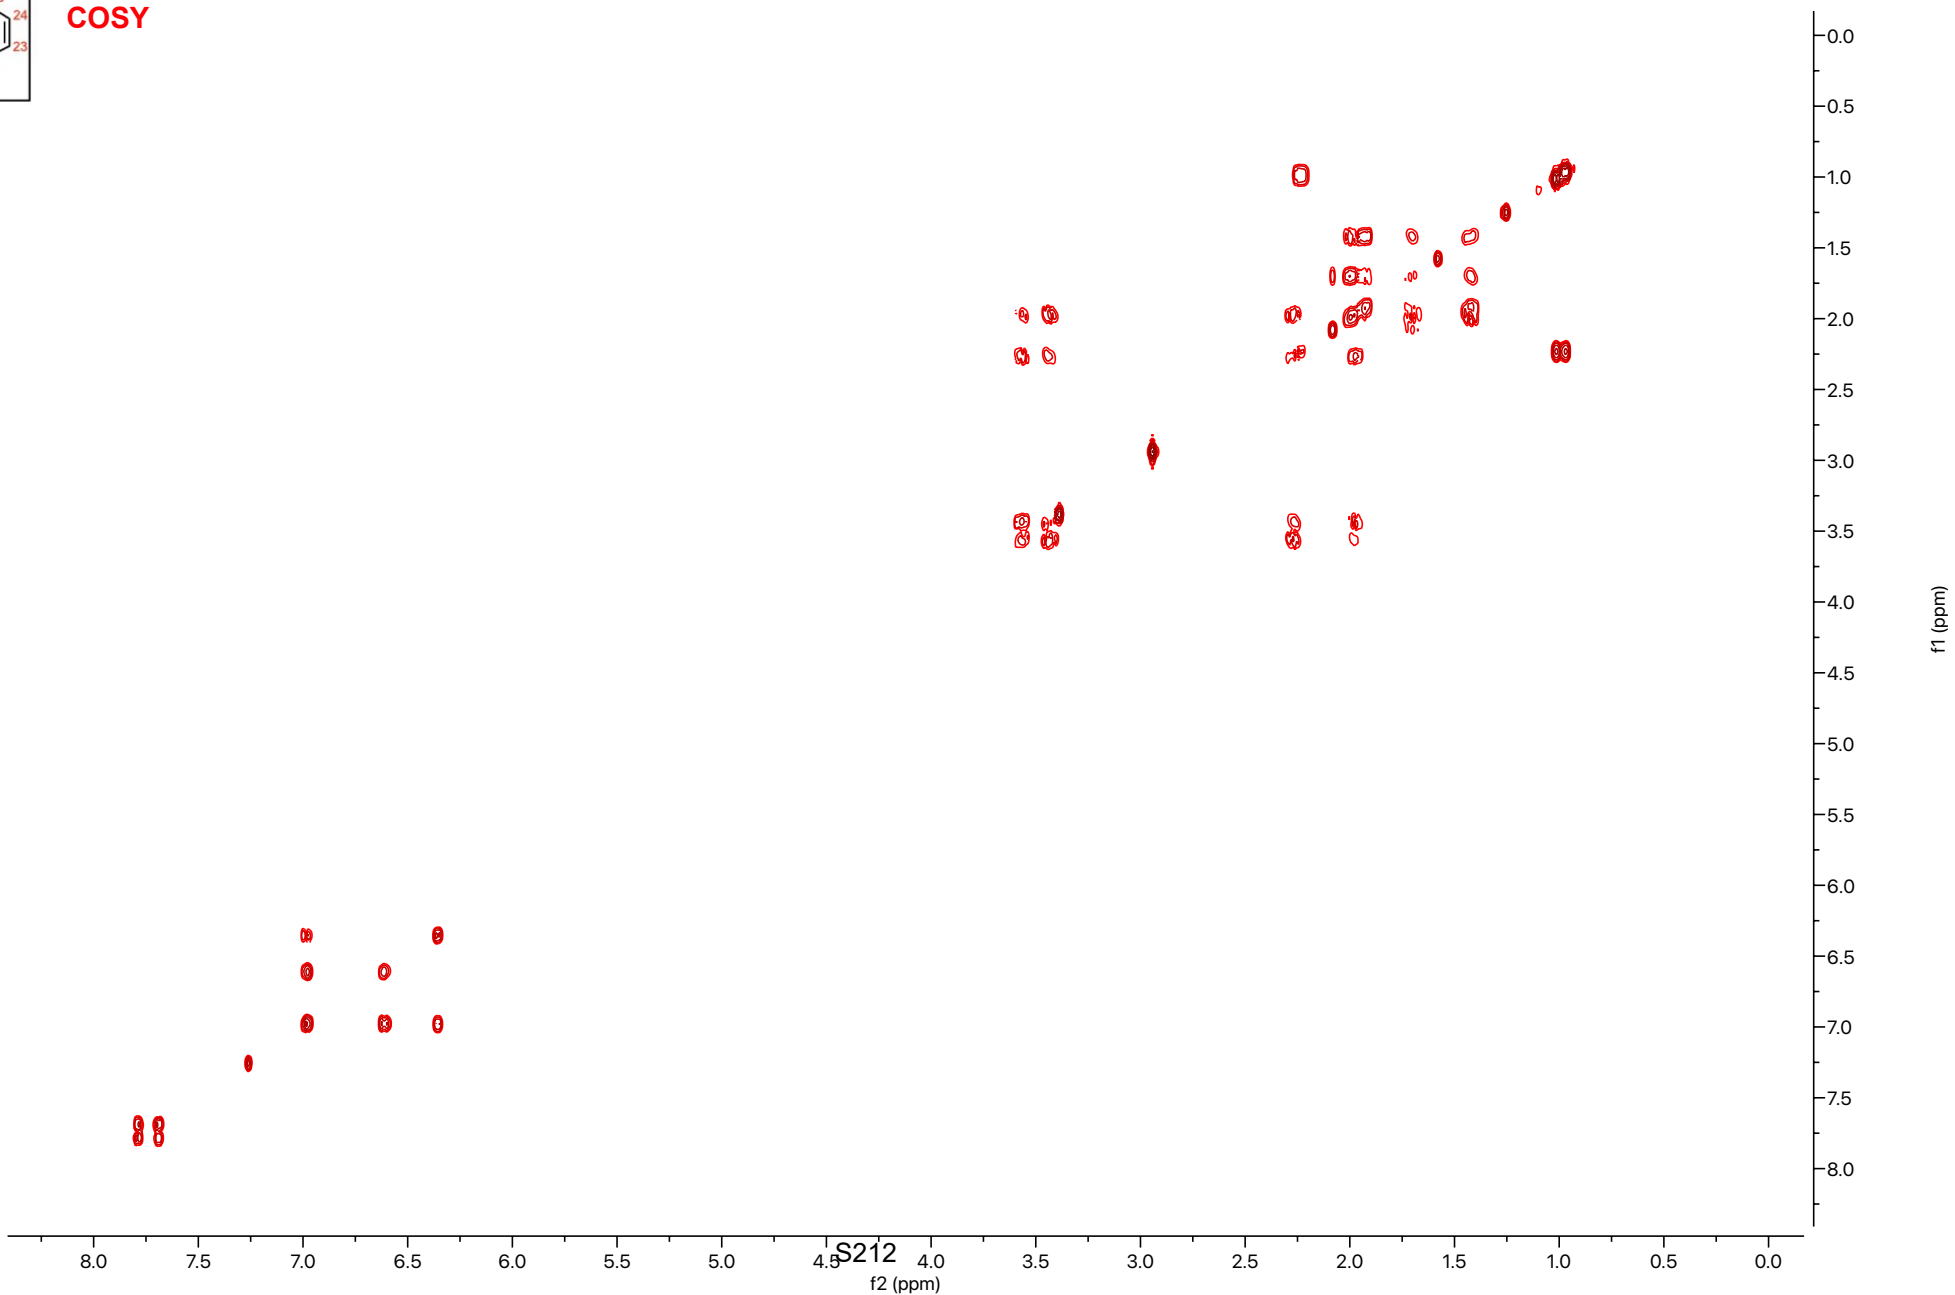

S212  
f2 (ppm)

f1 (ppm)

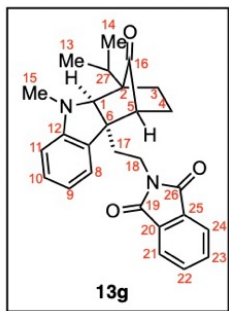

HSQC

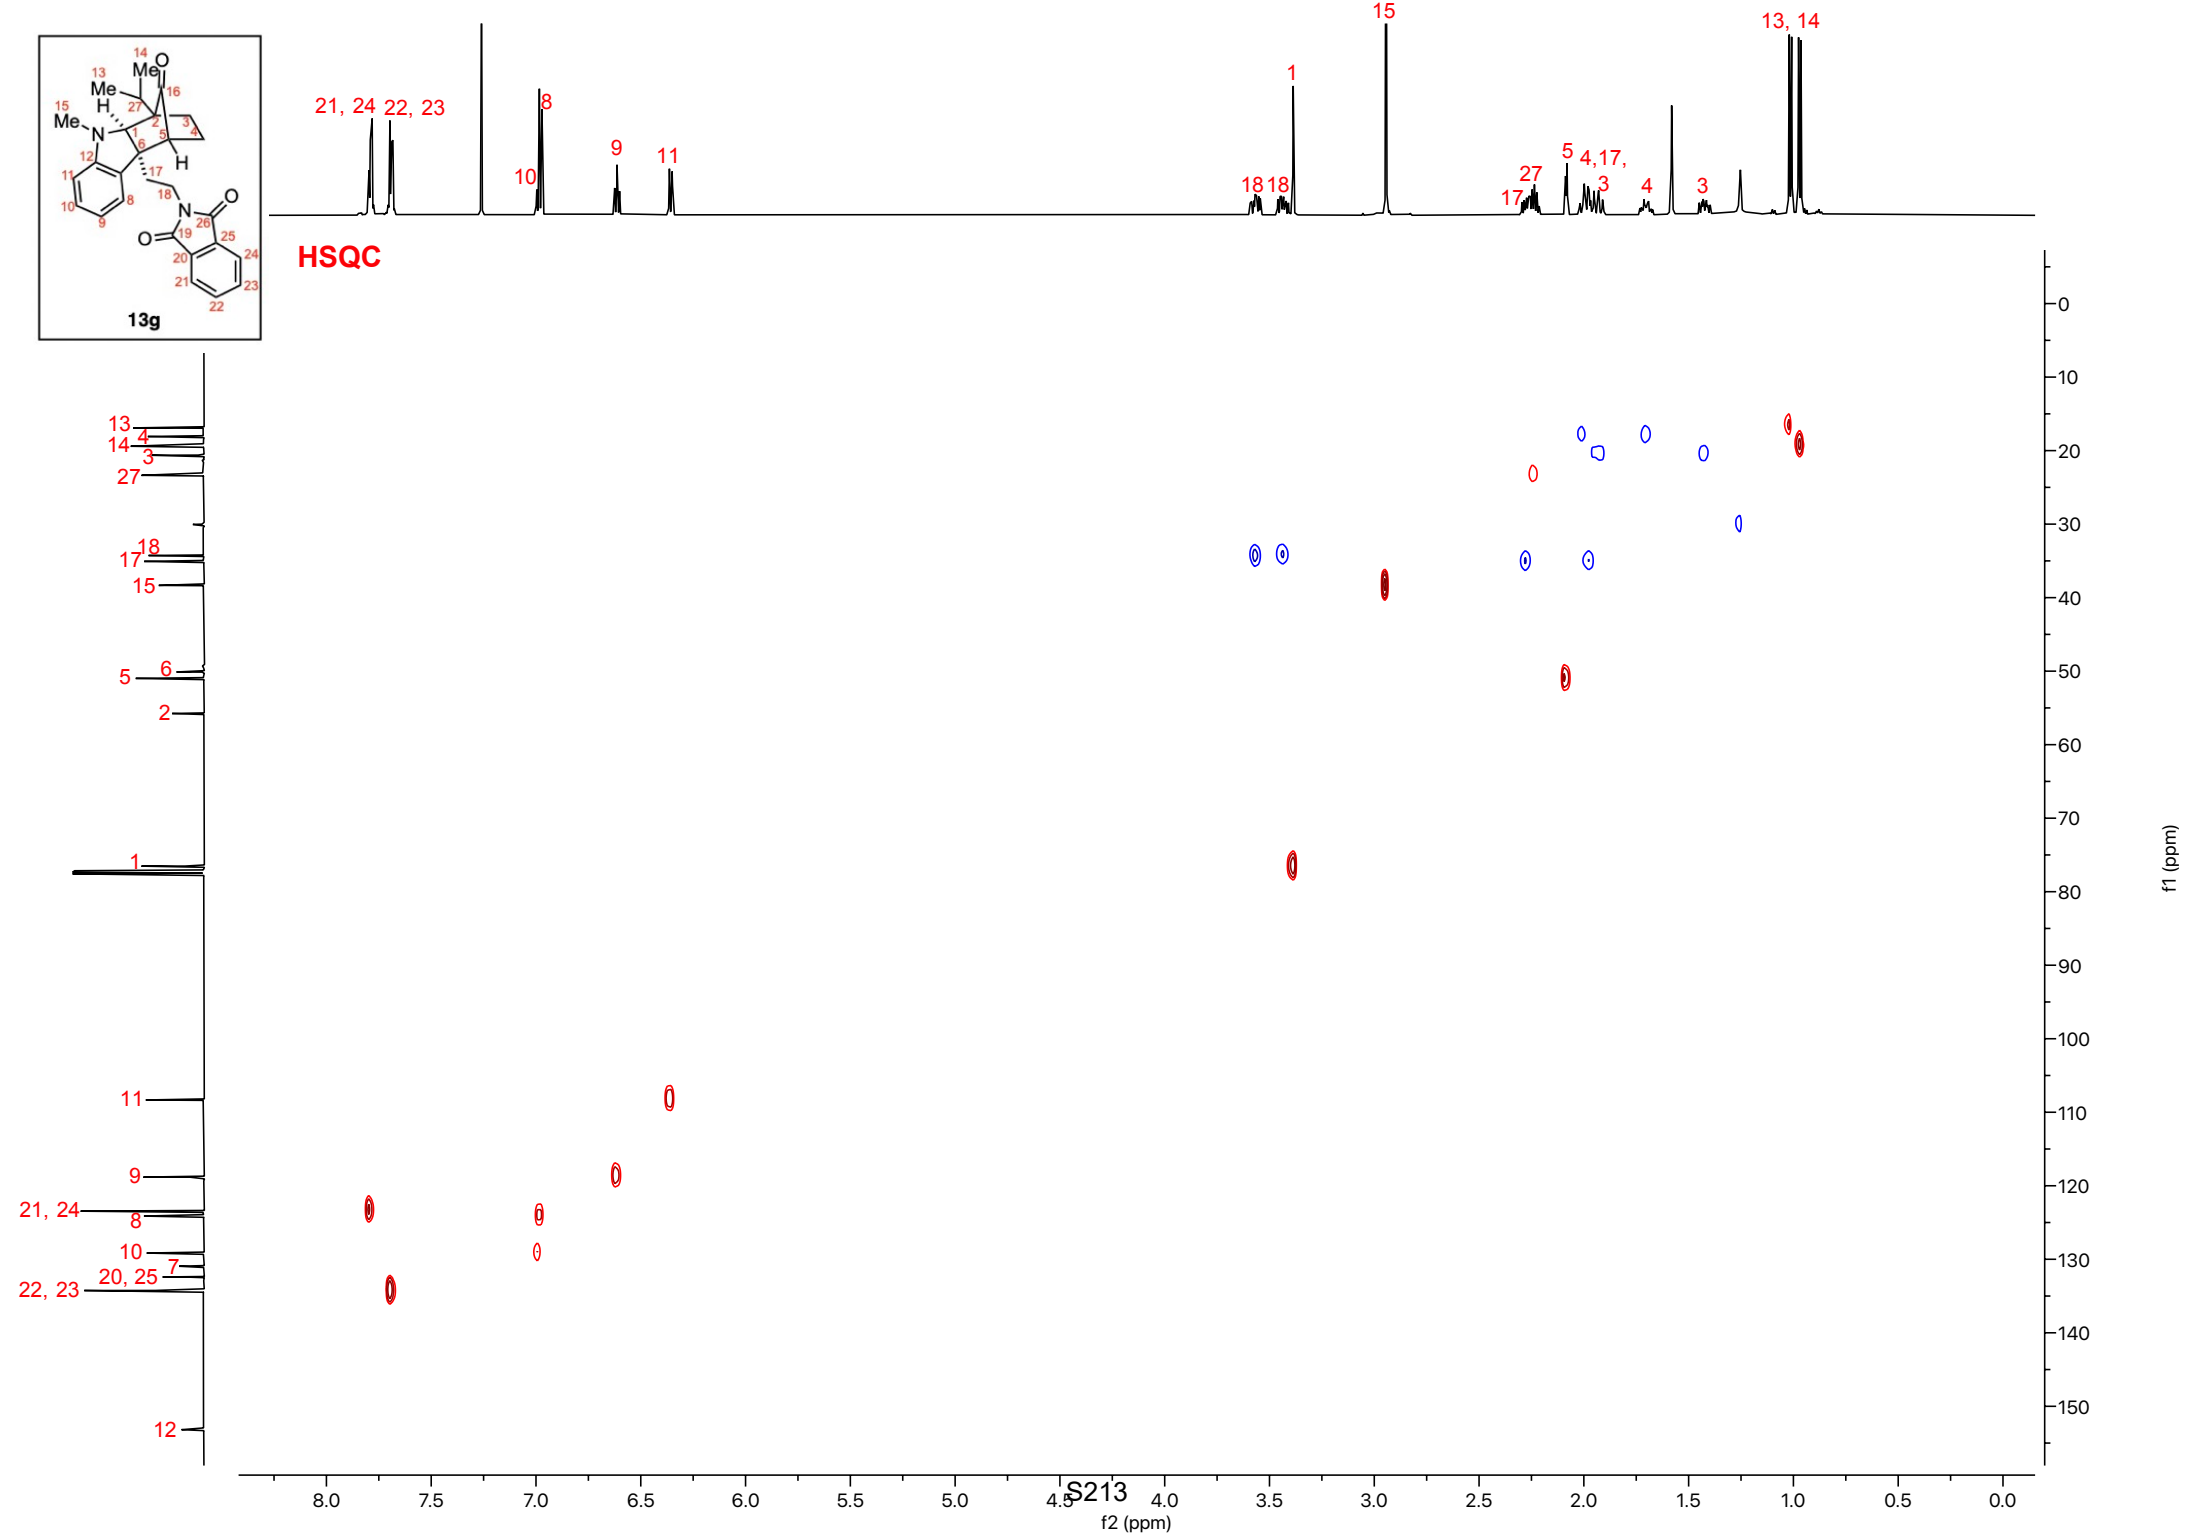

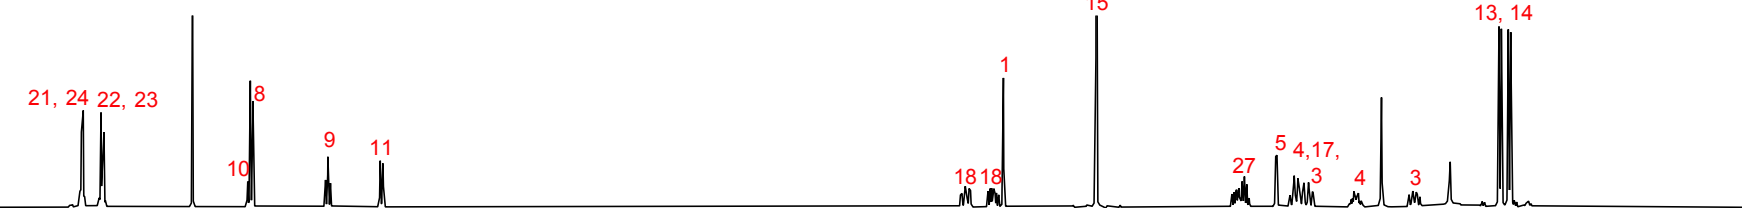

**HMBC**

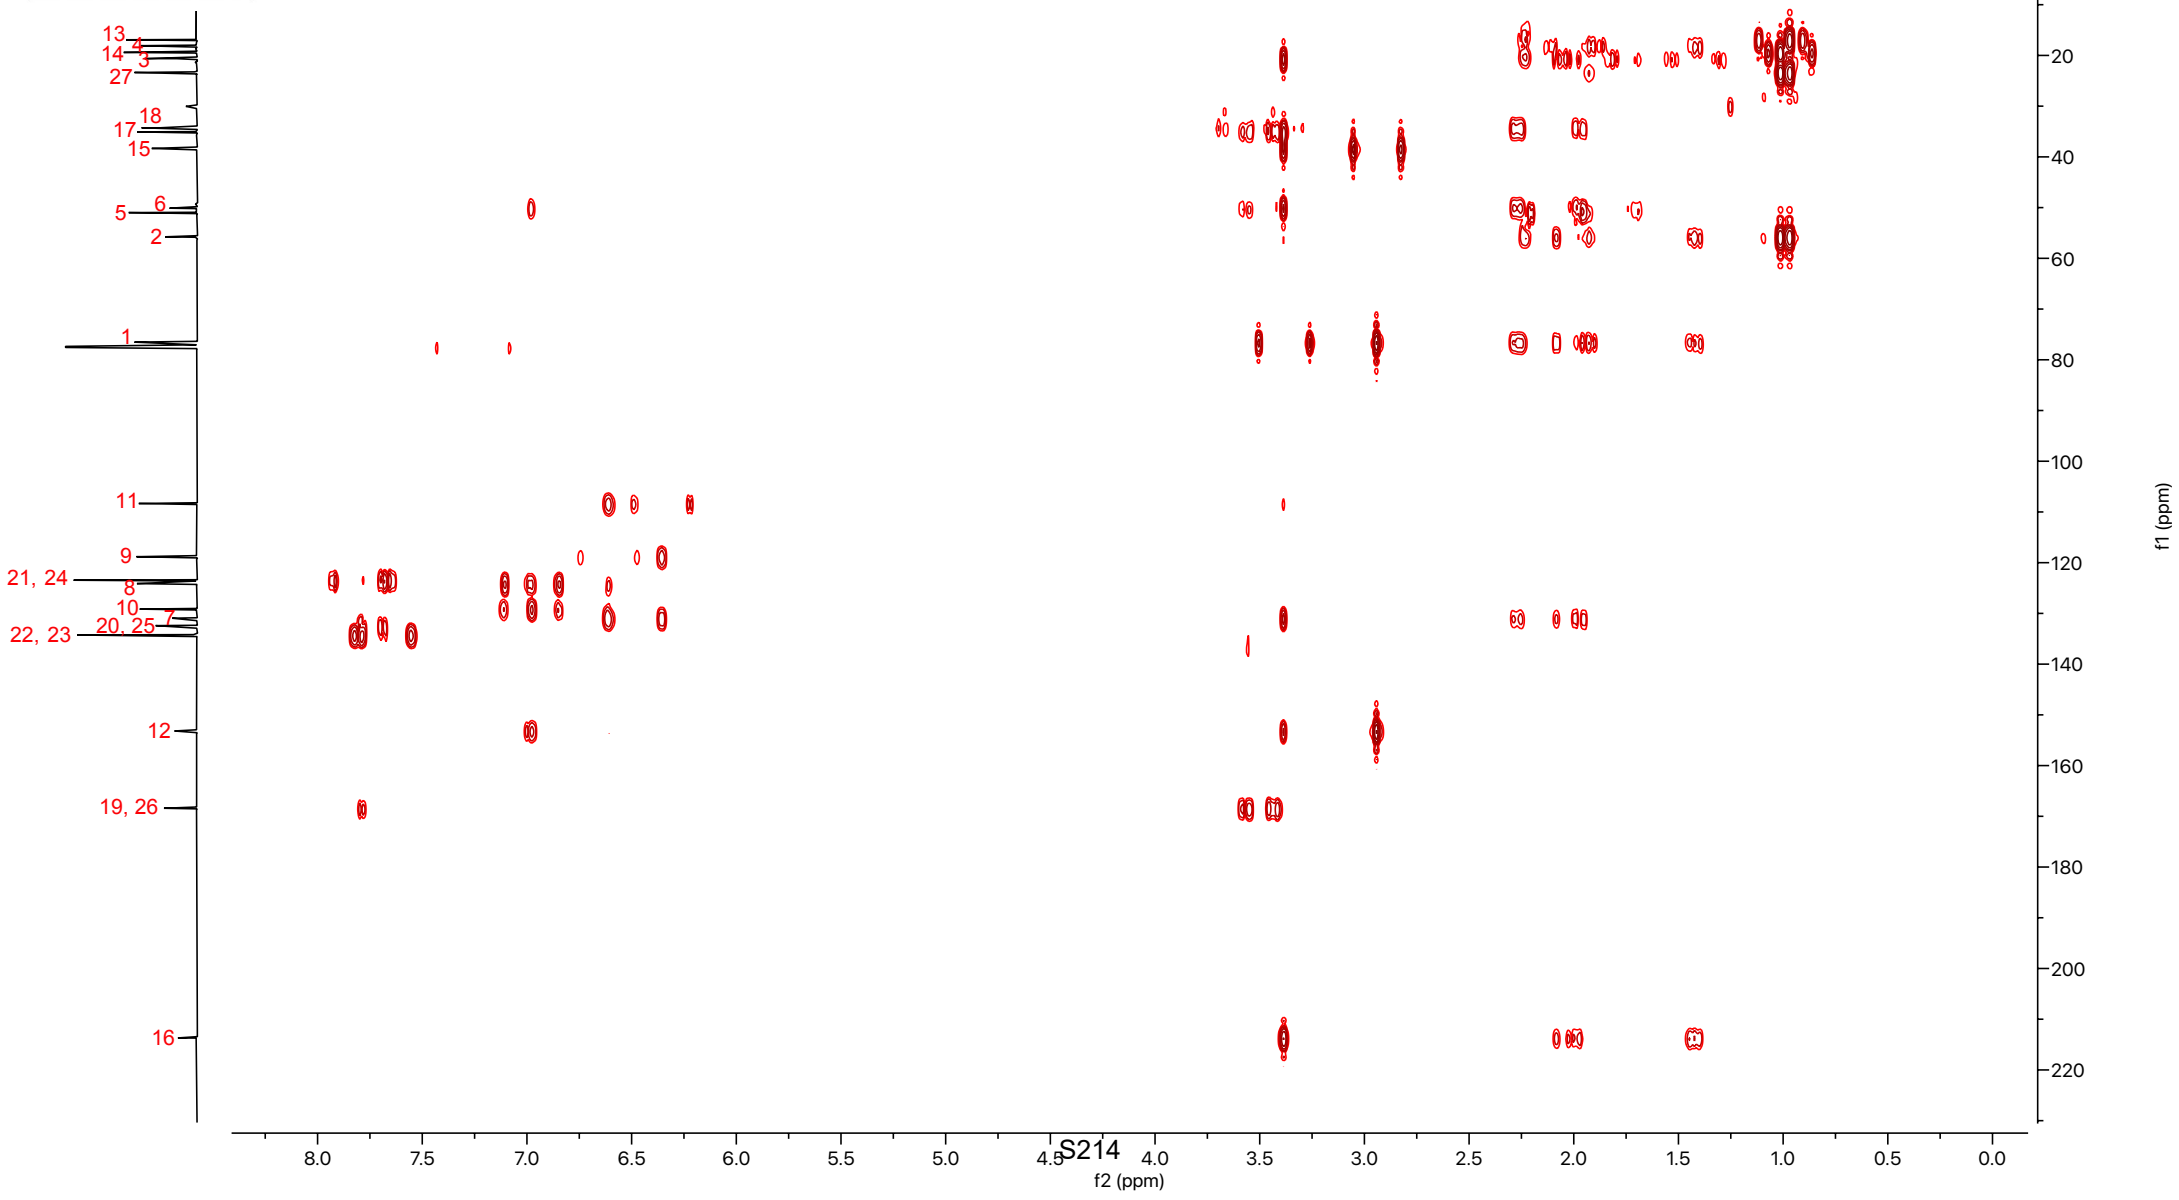

7.70 7.69 7.69 7.68 7.68 7.67 7.65 7.64 7.64 7.63 7.63 7.62 7.33 7.33 7.32 7.32 7.31 7.31 7.30 7.30 7.29 7.29 7.28 7.28 7.22 7.22 7.22 7.21 7.21 7.21 7.20 7.20 7.19 7.19 6.86 6.86 6.85 6.85 6.84 6.84 6.83 6.83 6.83 6.82 6.82 6.82 6.42 6.42 6.41 6.41 6.40 6.40 6.40 6.25 6.25 3.66 3.66 3.46 3.46 3.45 3.45 3.44 3.44 3.44 3.44 3.43 3.43 3.43 3.42 3.42 3.04 3.04 3.01 3.01 2.99 2.99 2.39 2.39 2.37 2.37 2.36 2.36 2.36 2.36 2.33 2.33 2.00 2.00 1.99 1.99 1.95 1.95 1.94 1.94 1.93 1.93 1.93 1.92 1.92 1.91 1.91 1.90 1.90 1.63 1.63 1.62 1.62 1.61 1.61 1.61 1.60 1.60 1.59 1.59 1.58 1.58 1.58 1.58 1.57 1.57 1.57 1.56 1.56 1.55 1.55 1.54 1.54 1.54 1.53 1.53 1.52 1.52 1.42 1.42 1.42 1.42 1.41 1.41 1.40 1.40 1.40 1.40 1.39 1.39 1.38 1.38 1.38 1.37 1.37 1.31 1.31 1.30 1.30 1.29 1.29 1.29 1.28 1.28 1.28 1.27 1.27 1.26 1.26

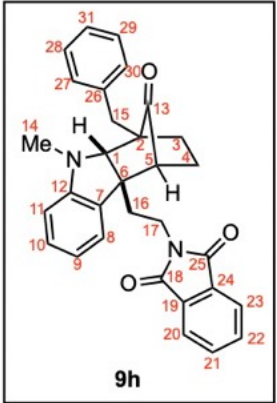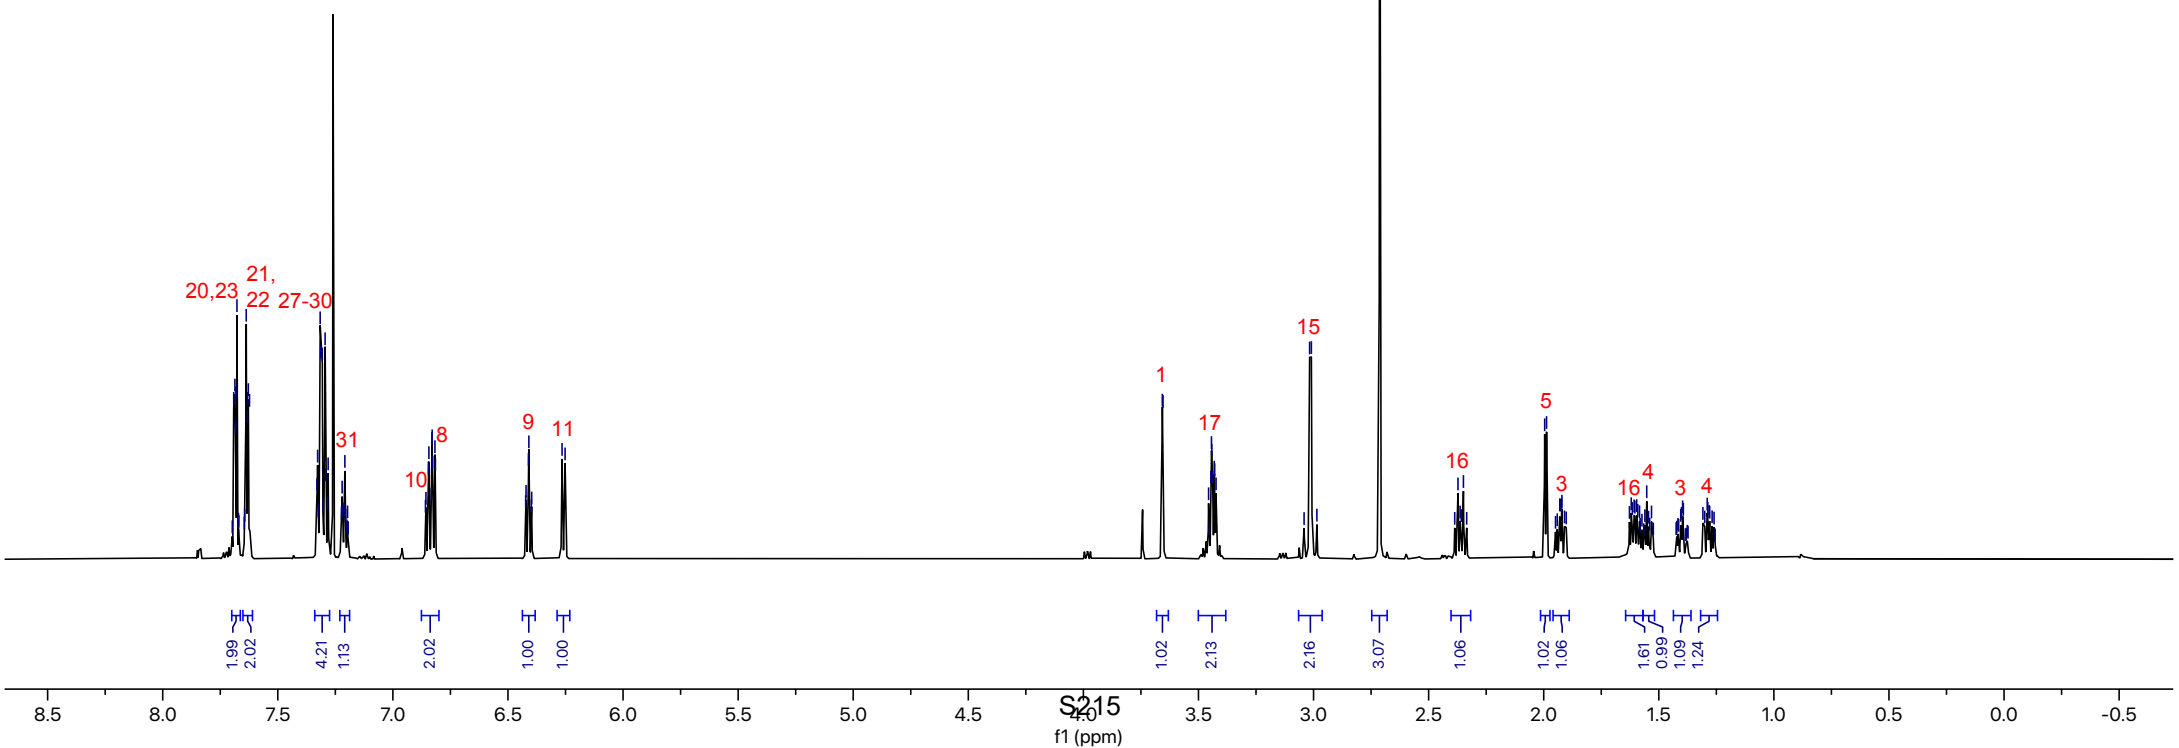



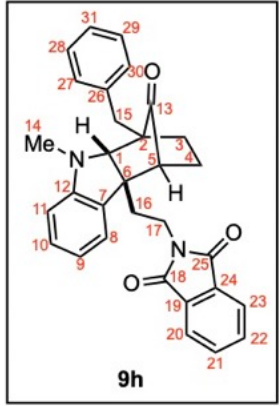

— 215.07

— 168.16

— 154.56

— 138.58

— 133.93

— 132.32

— 130.67

— 128.81

— 128.72

— 128.18

— 126.70

— 124.43

— 123.25

— 117.71

— 106.52

— 71.35

— 52.99

— 51.19

— 50.45

— 36.34

— 35.77

— 35.53

— 33.75

— 22.29

— 19.32

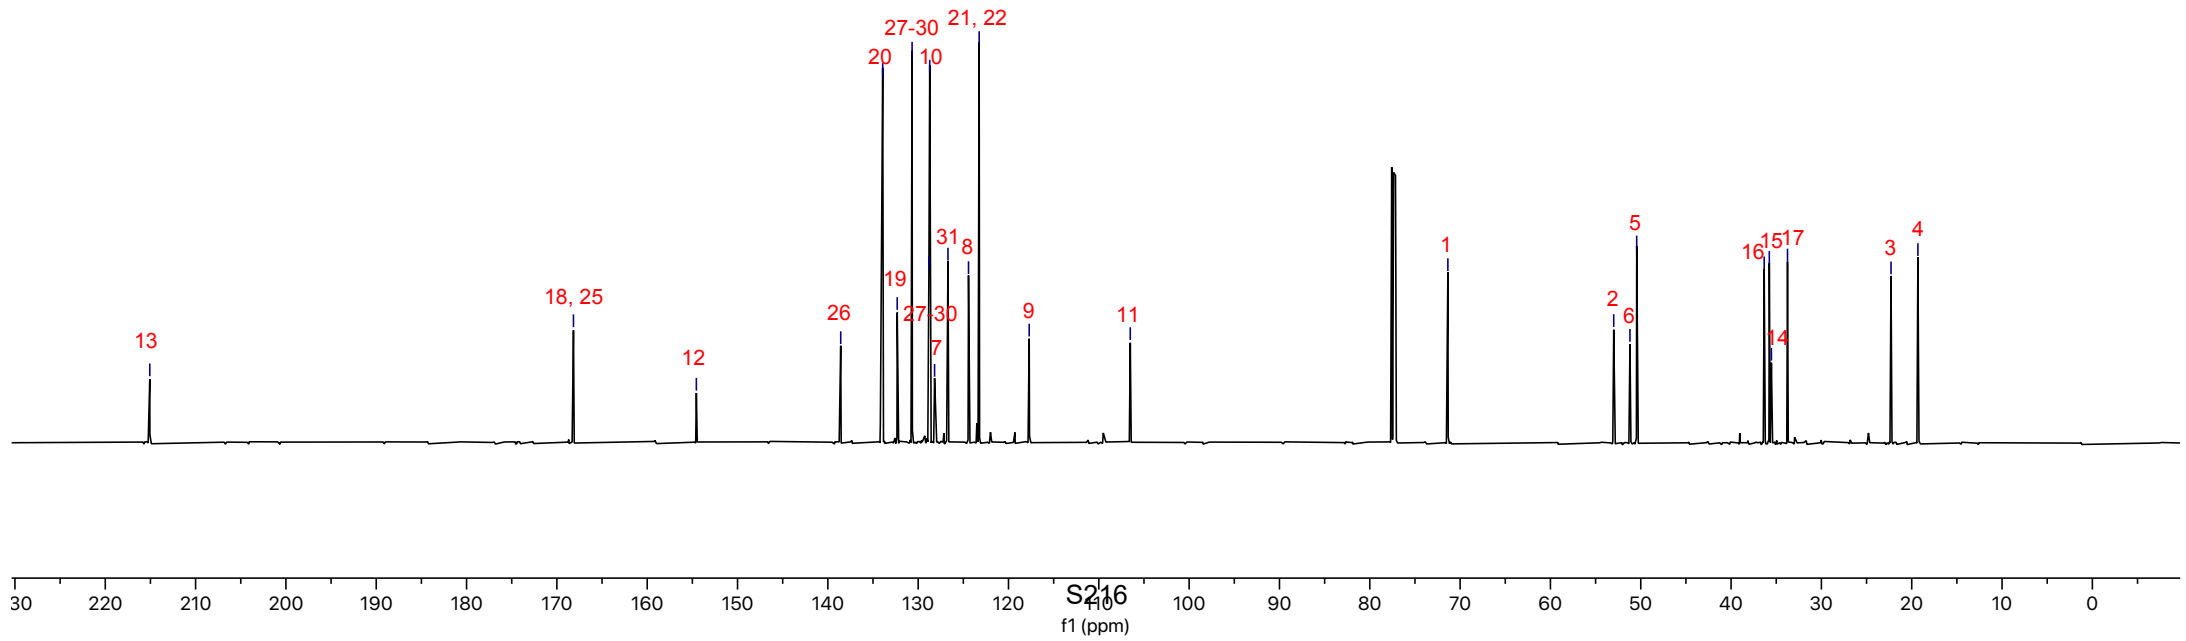

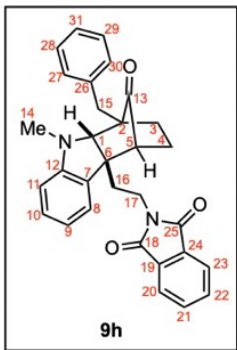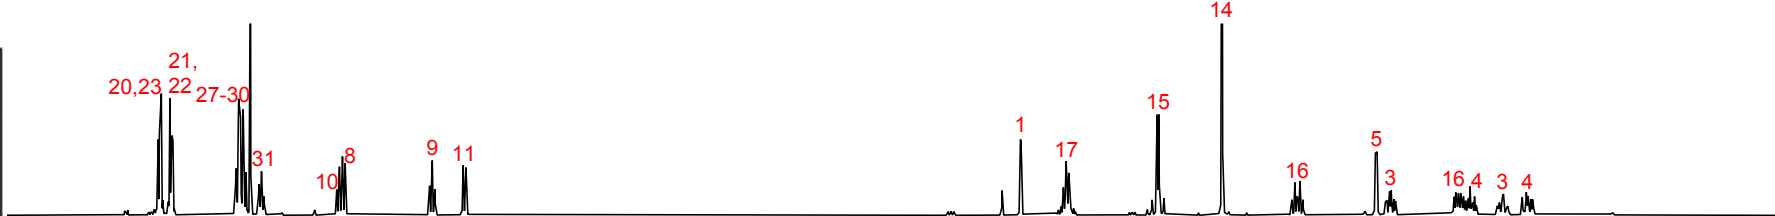

**COSY**

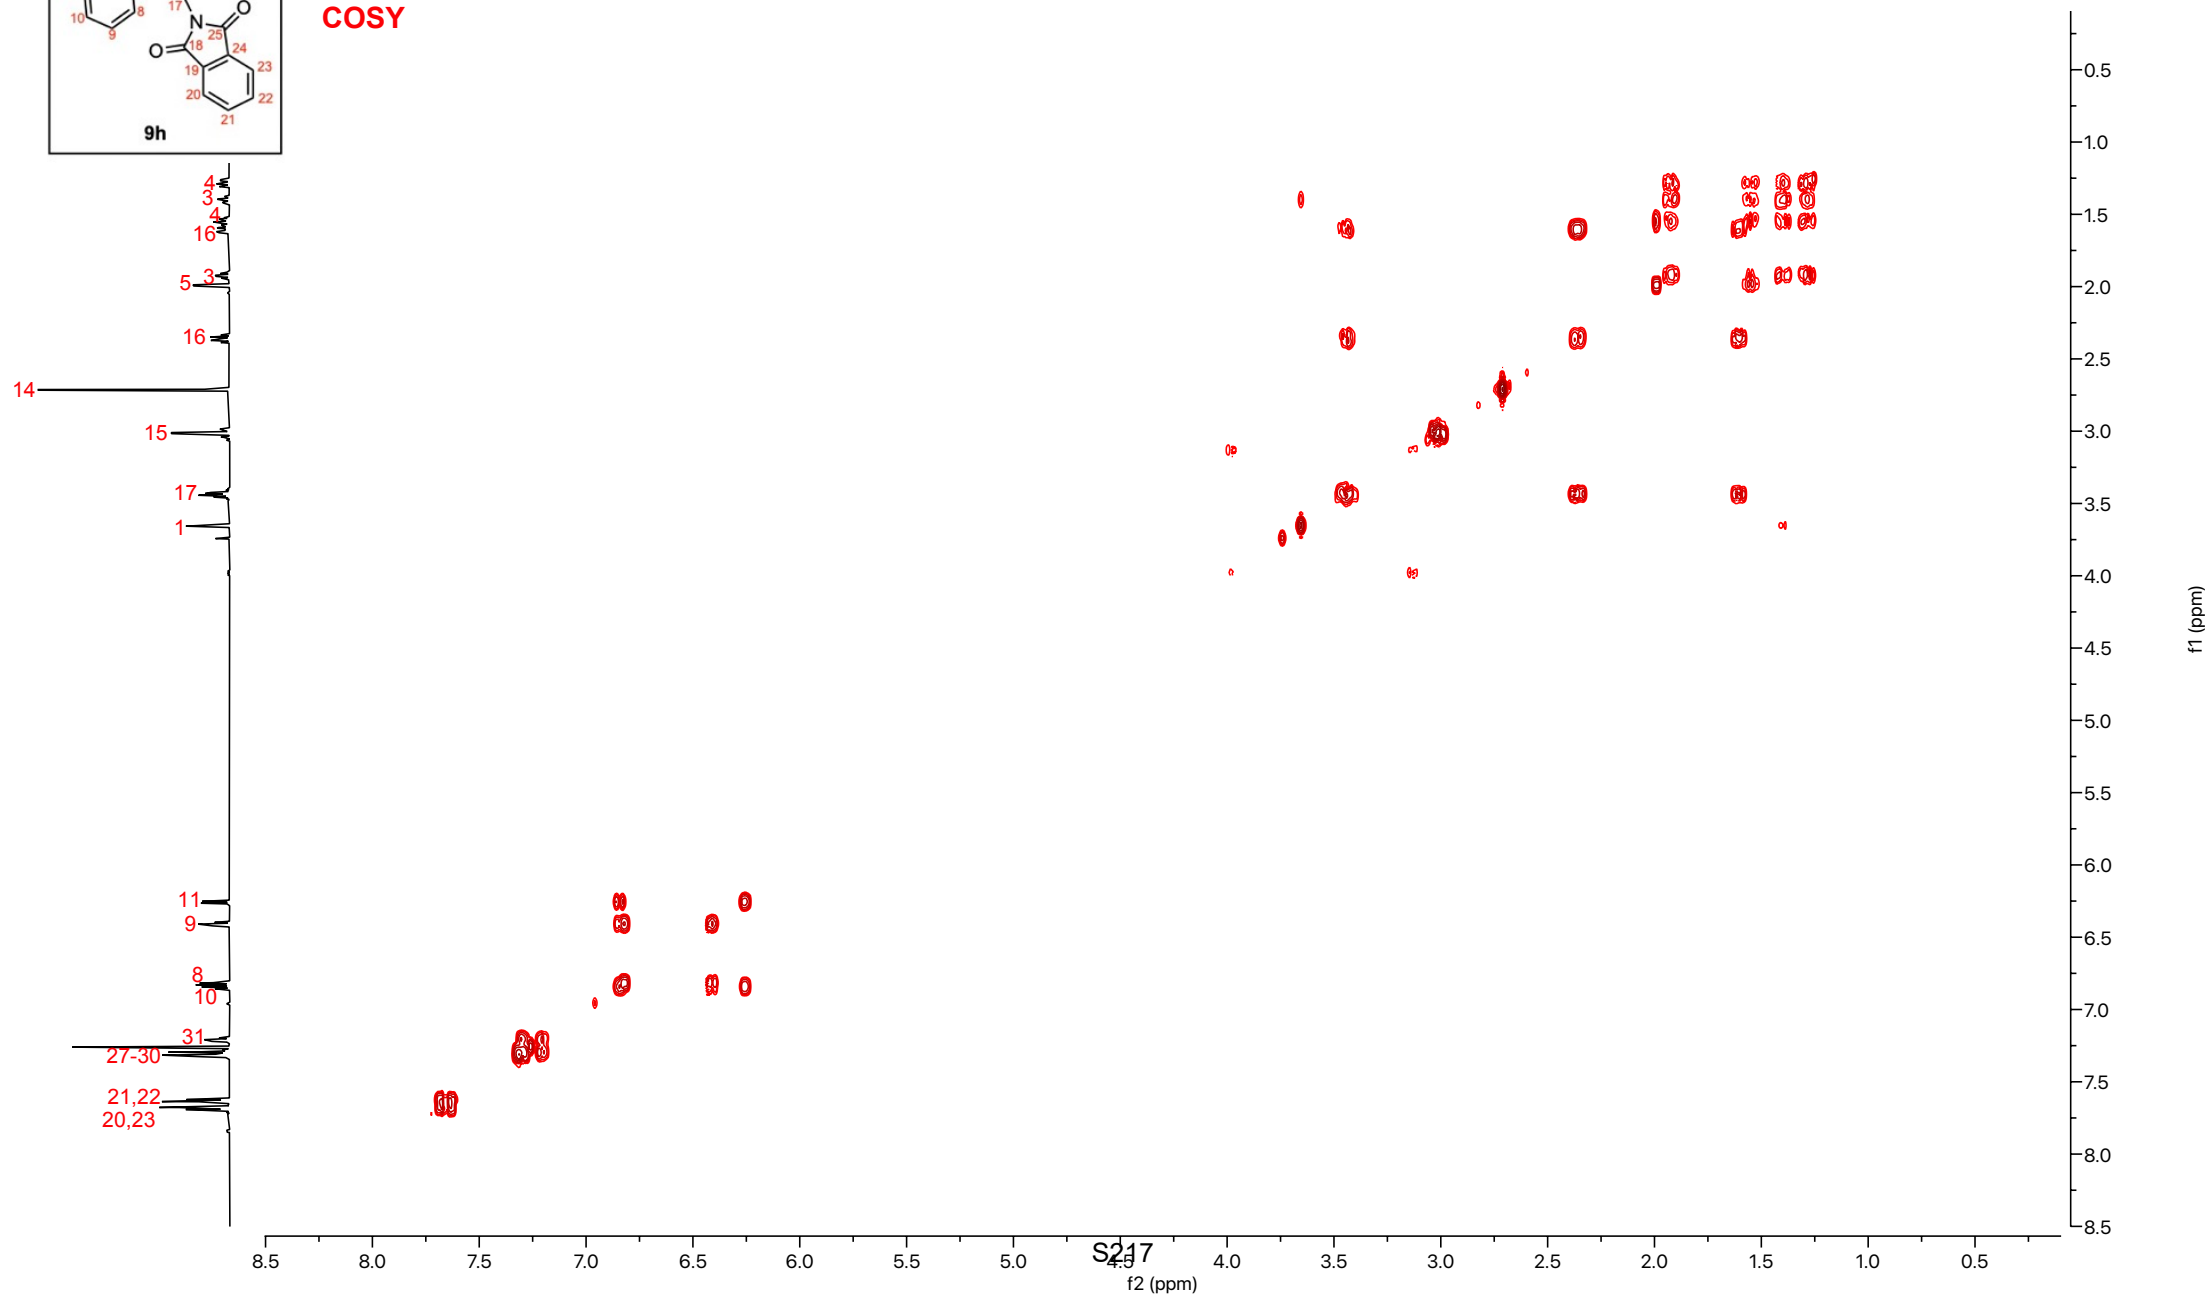

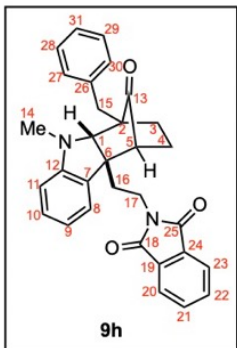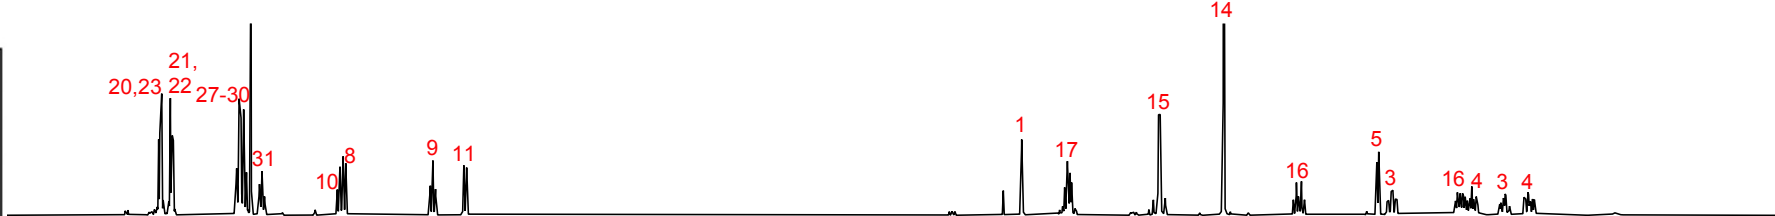

**HSQC**

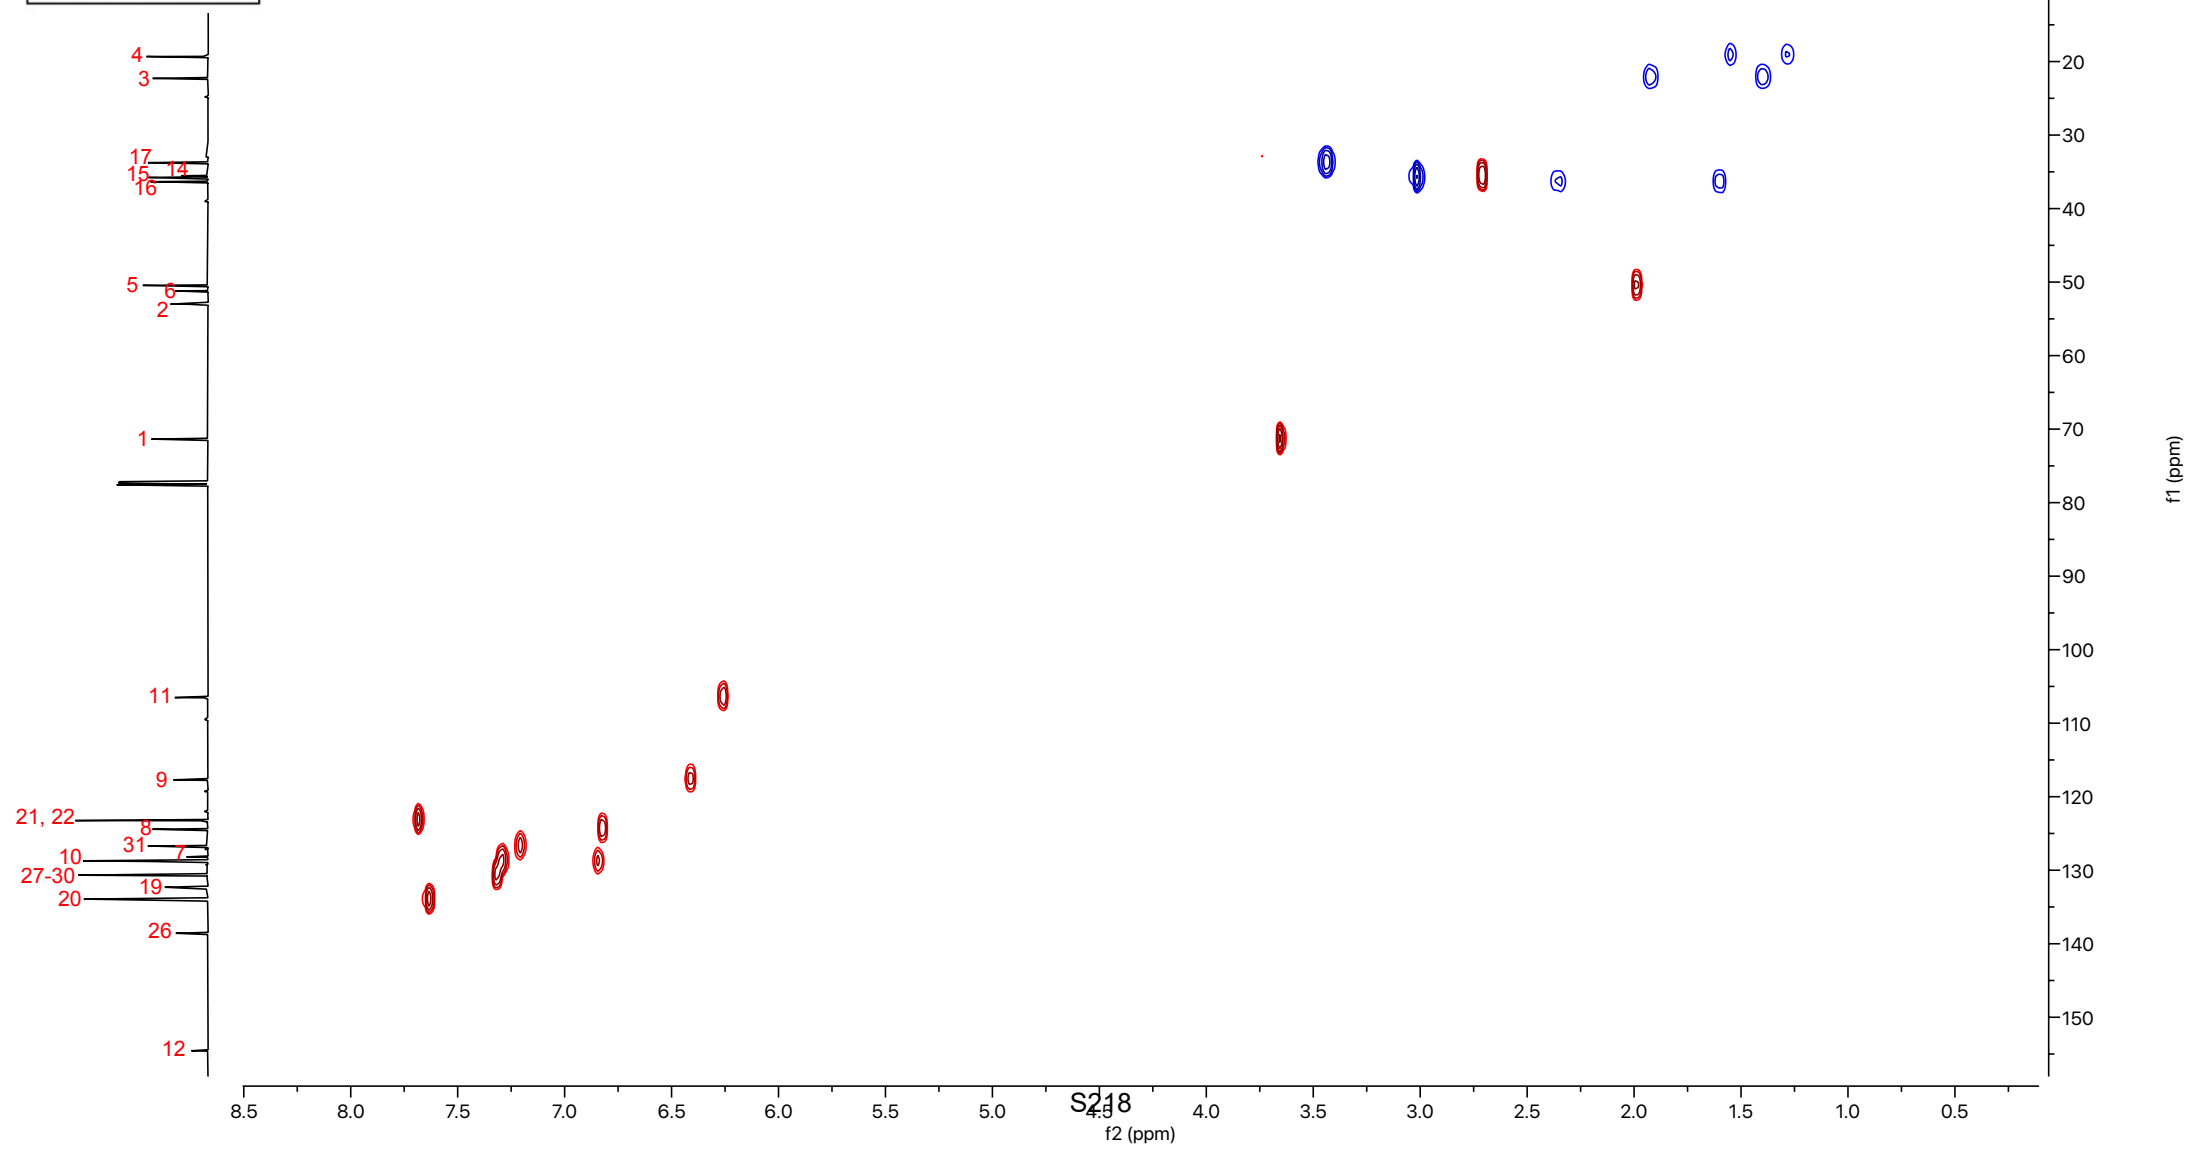

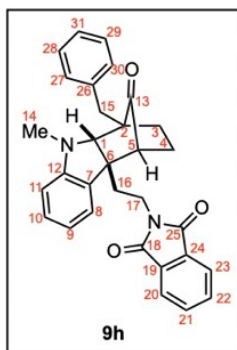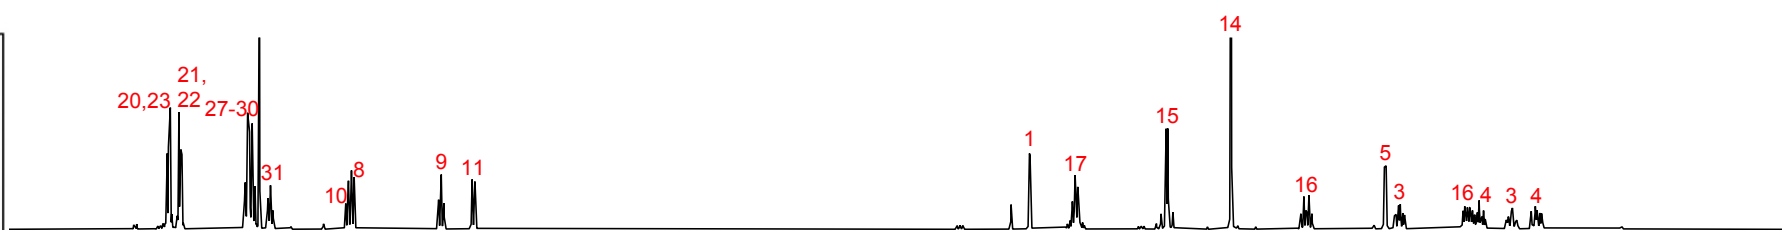

**HMBC**

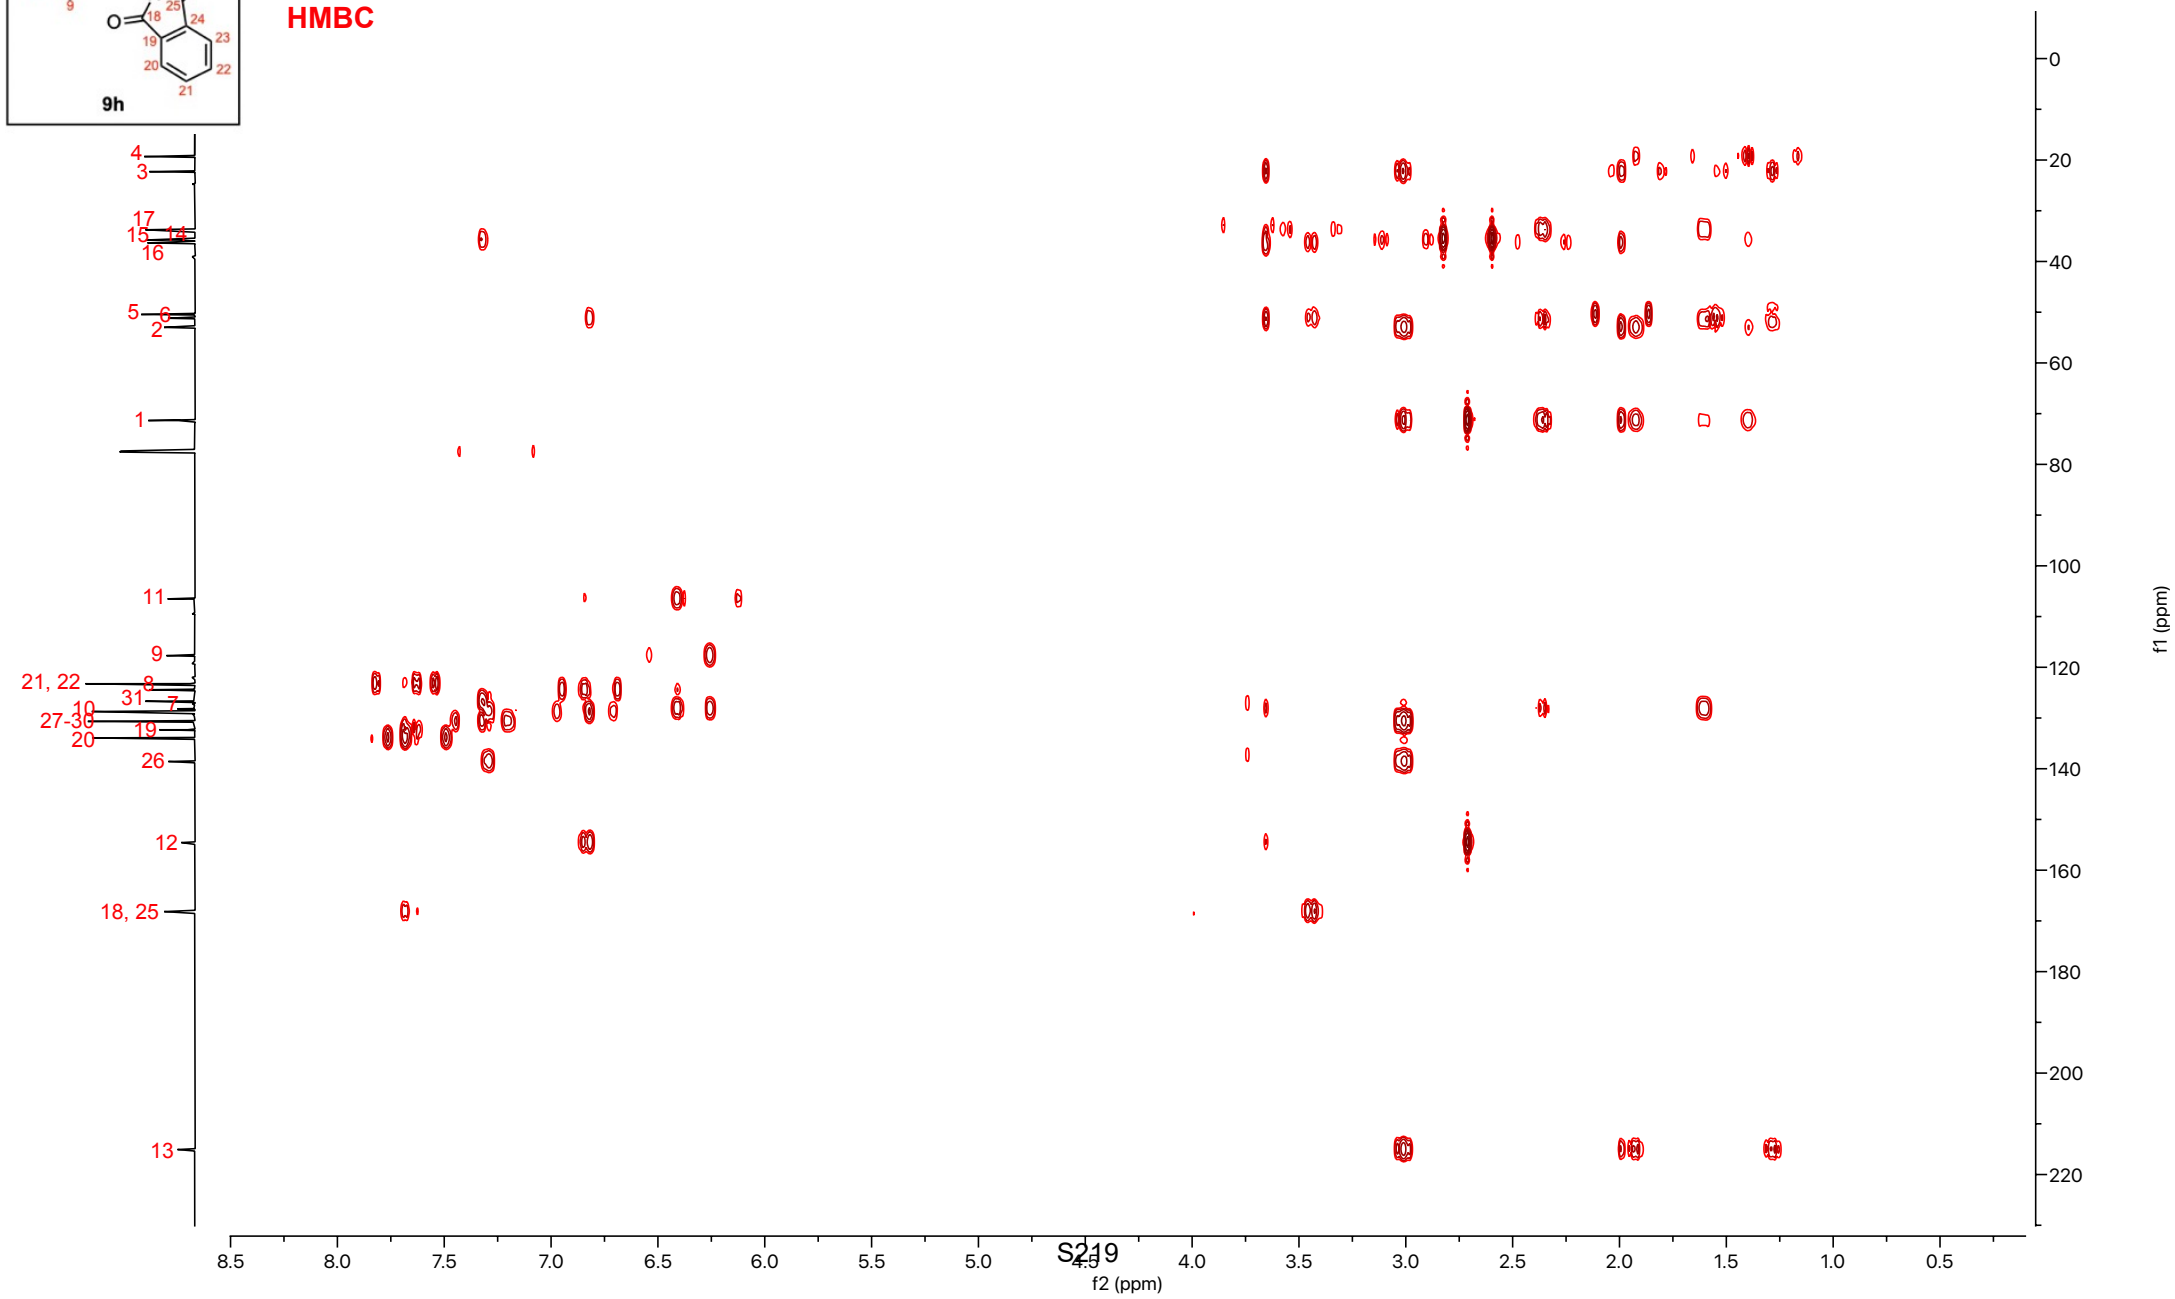

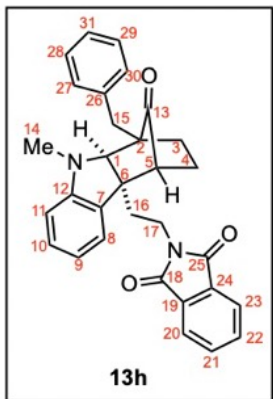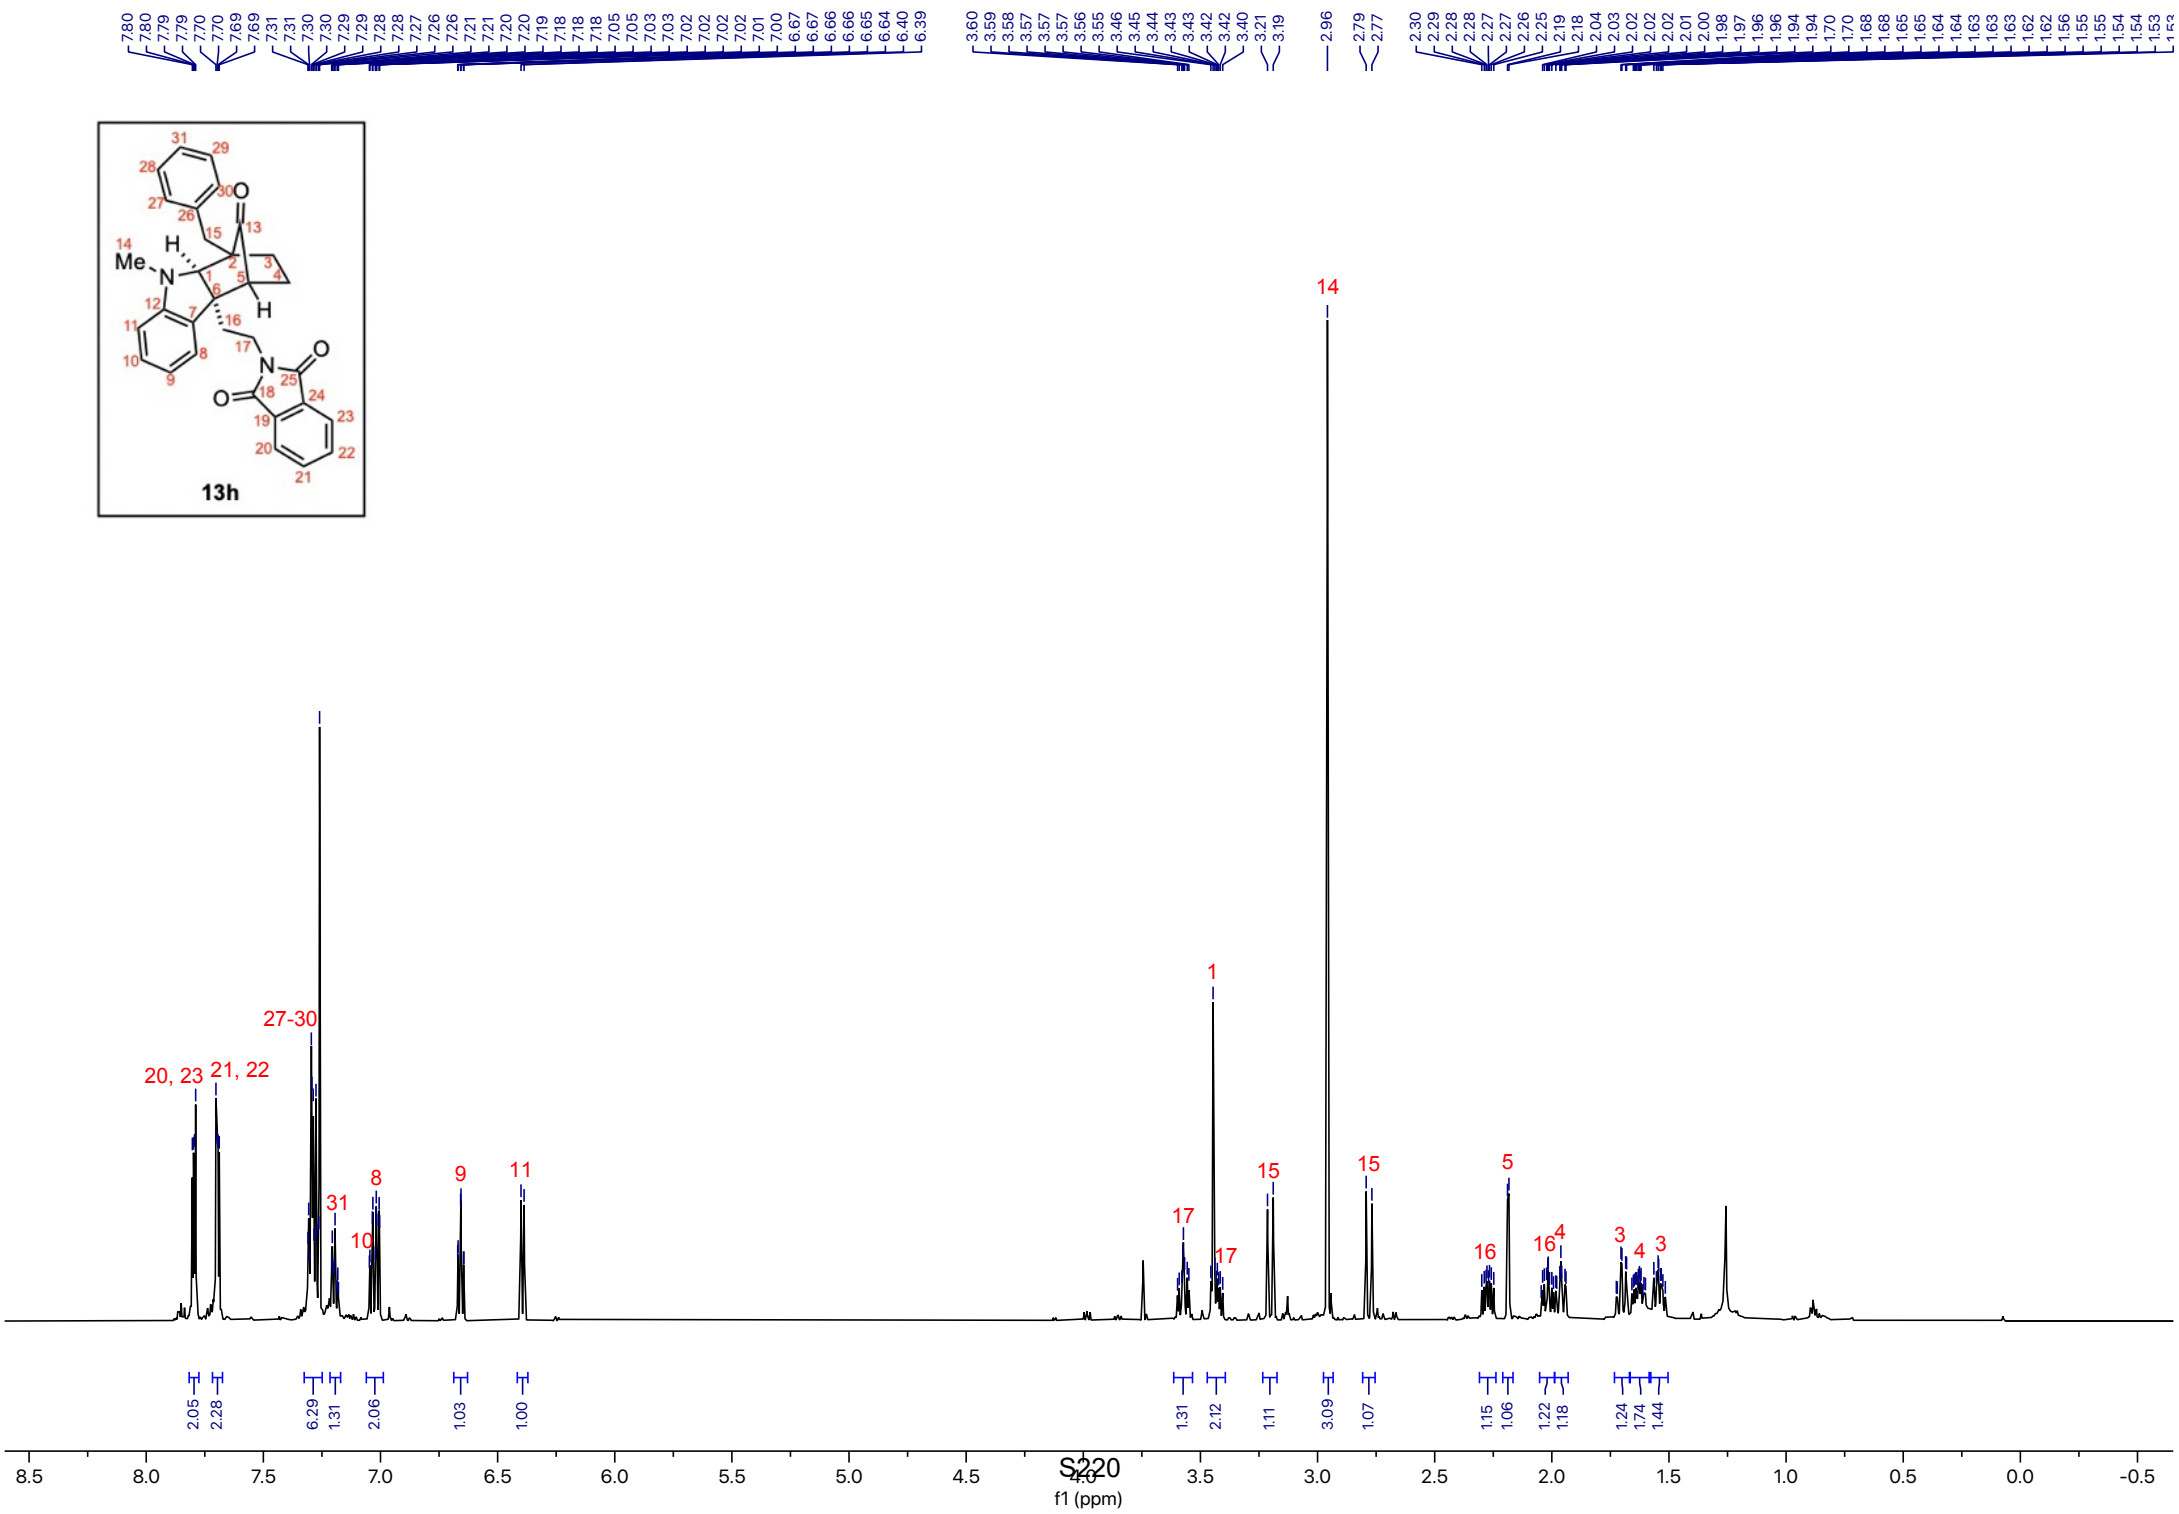



213.41

168.41

152.79

138.79  
134.28  
132.41  
131.00  
130.59  
129.36  
128.61  
126.40  
124.23  
123.48  
118.96

108.34

78.47

53.20  
50.83  
50.21

38.32  
35.13  
34.26  
32.31  
30.05

24.62

18.25

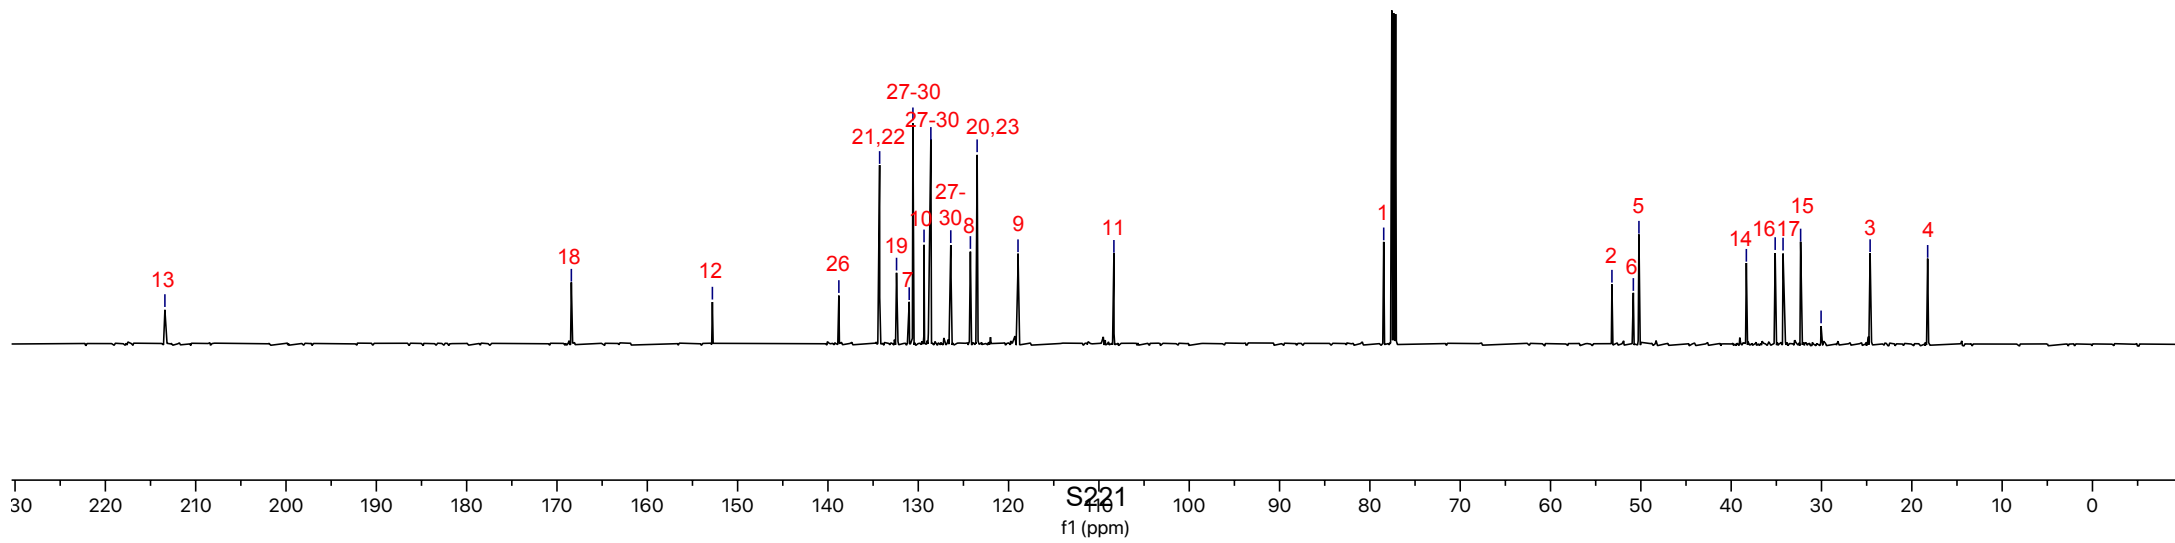

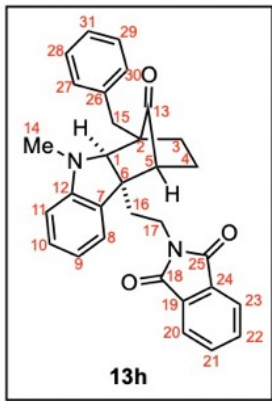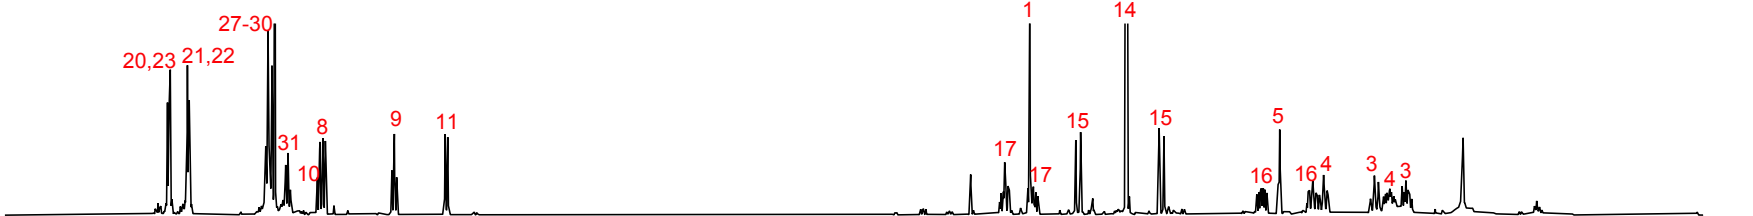

**COSY**

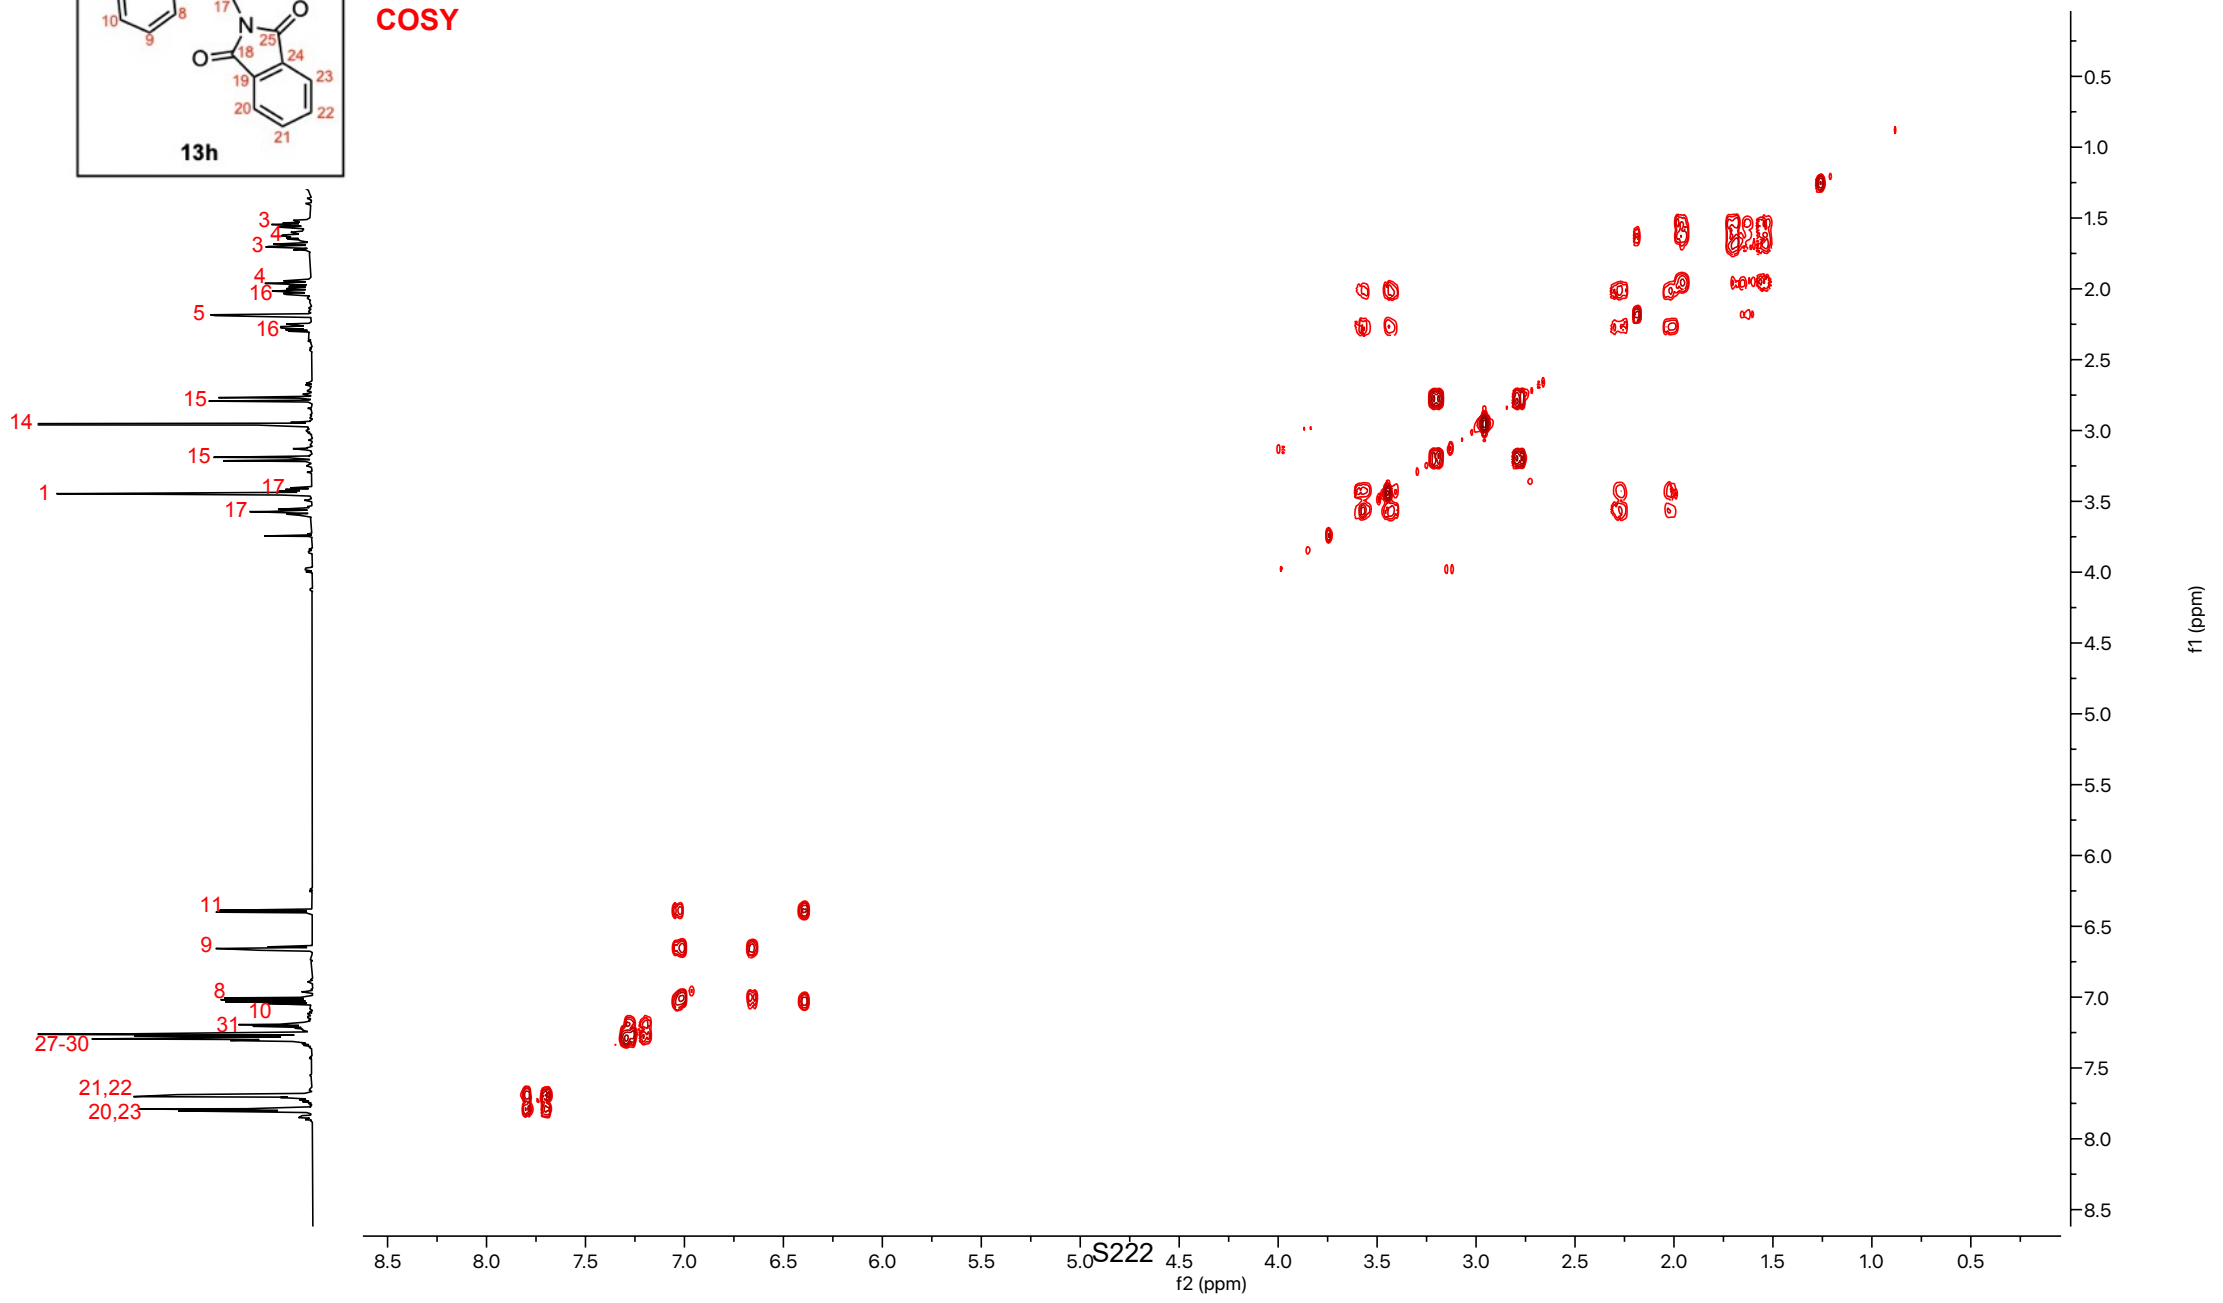

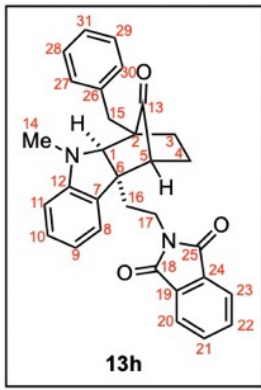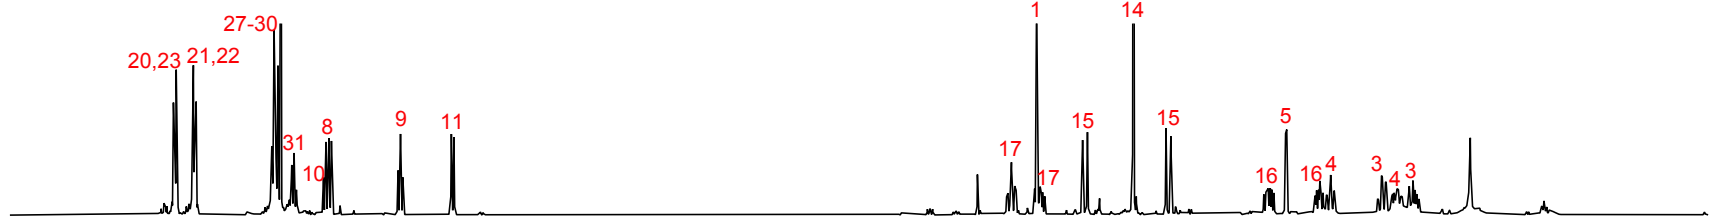

**HSQC**

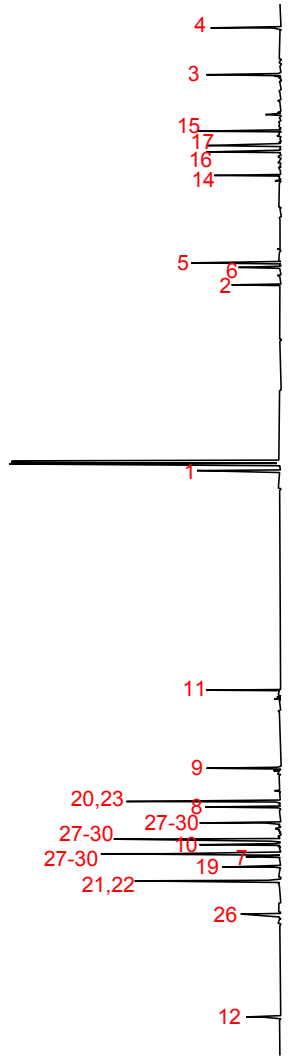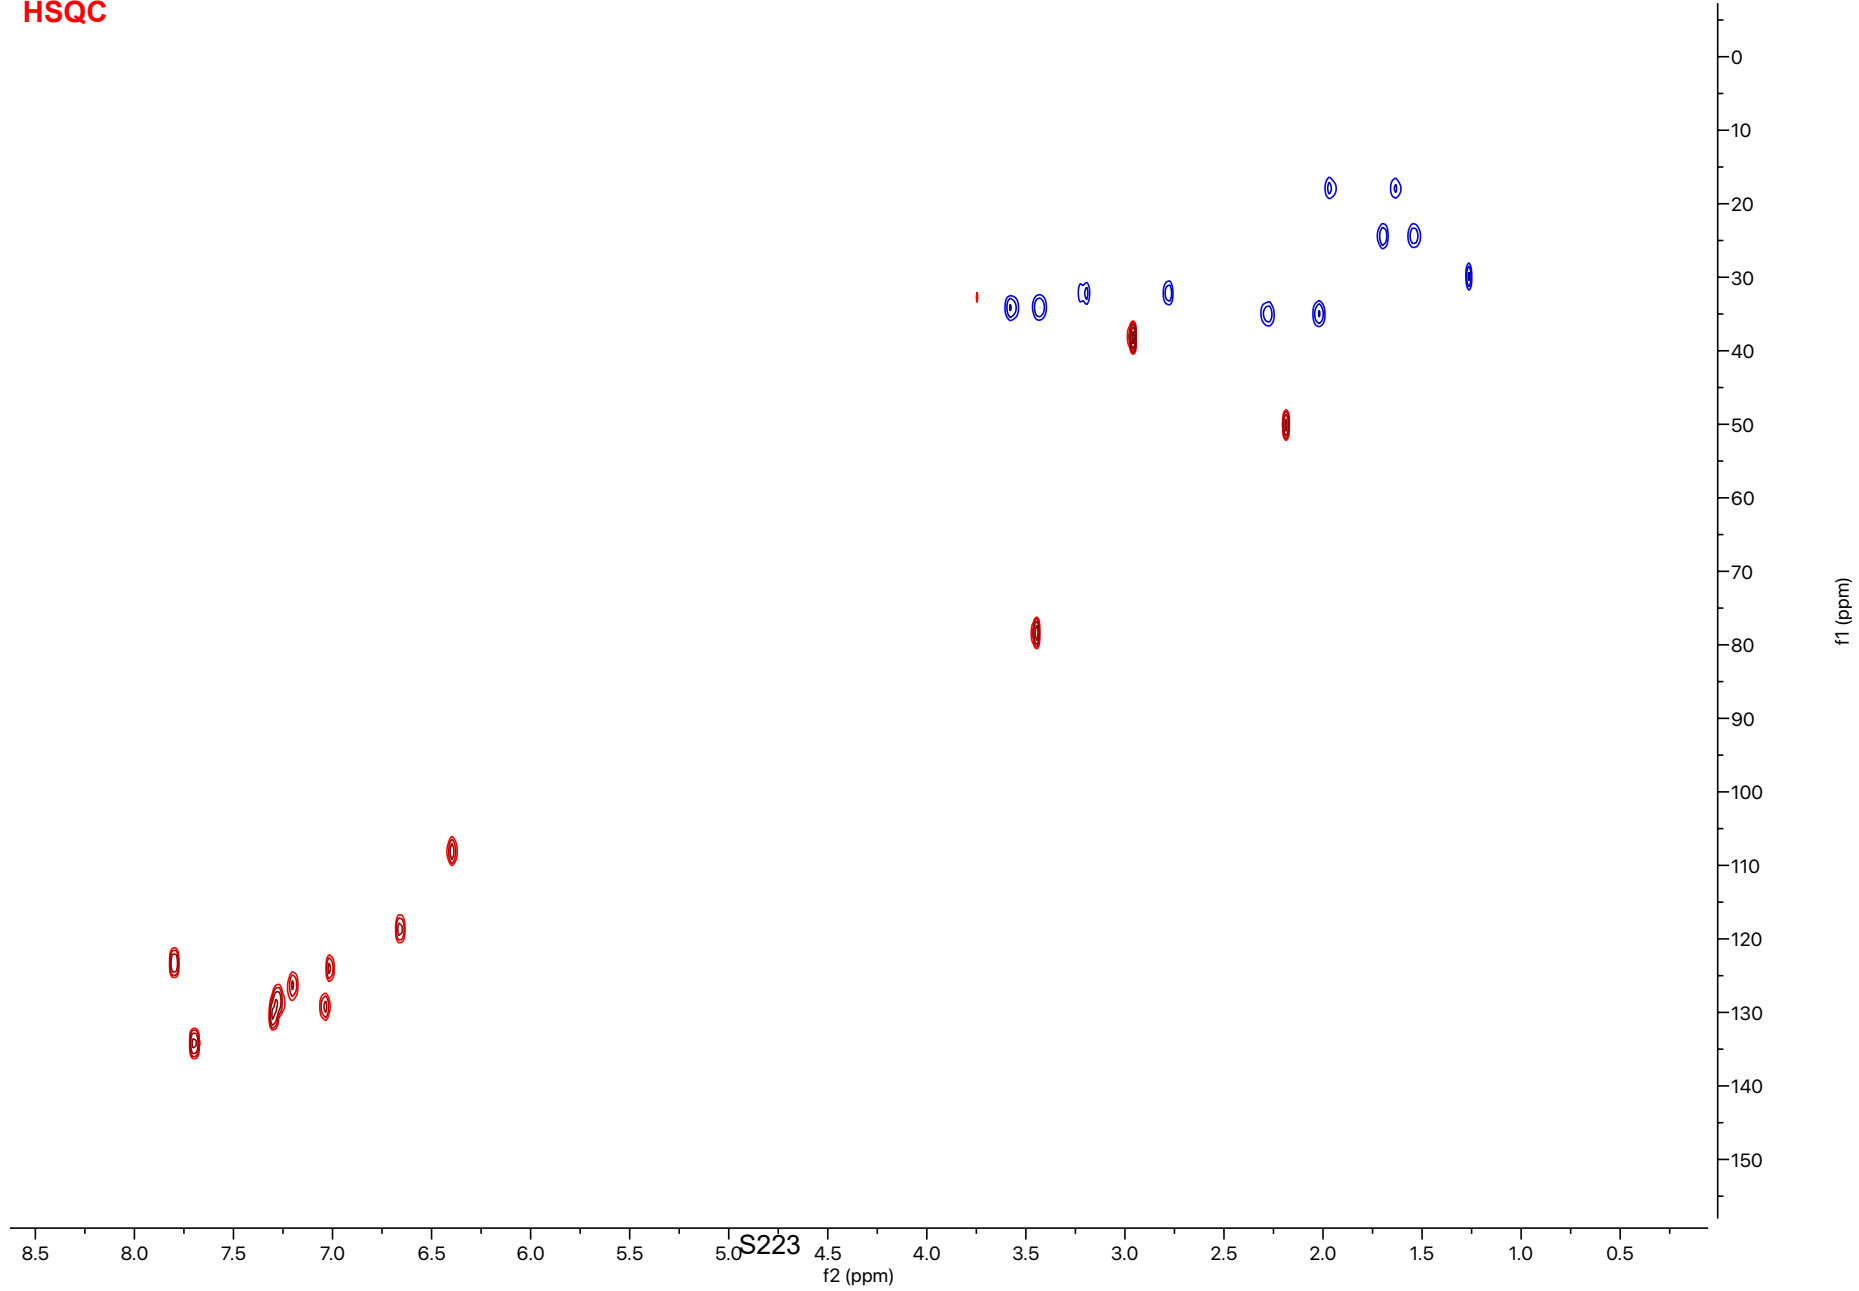



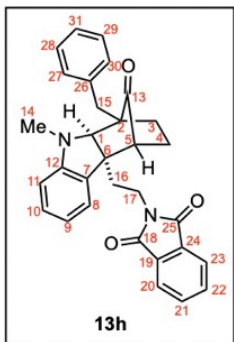

**HMBC**

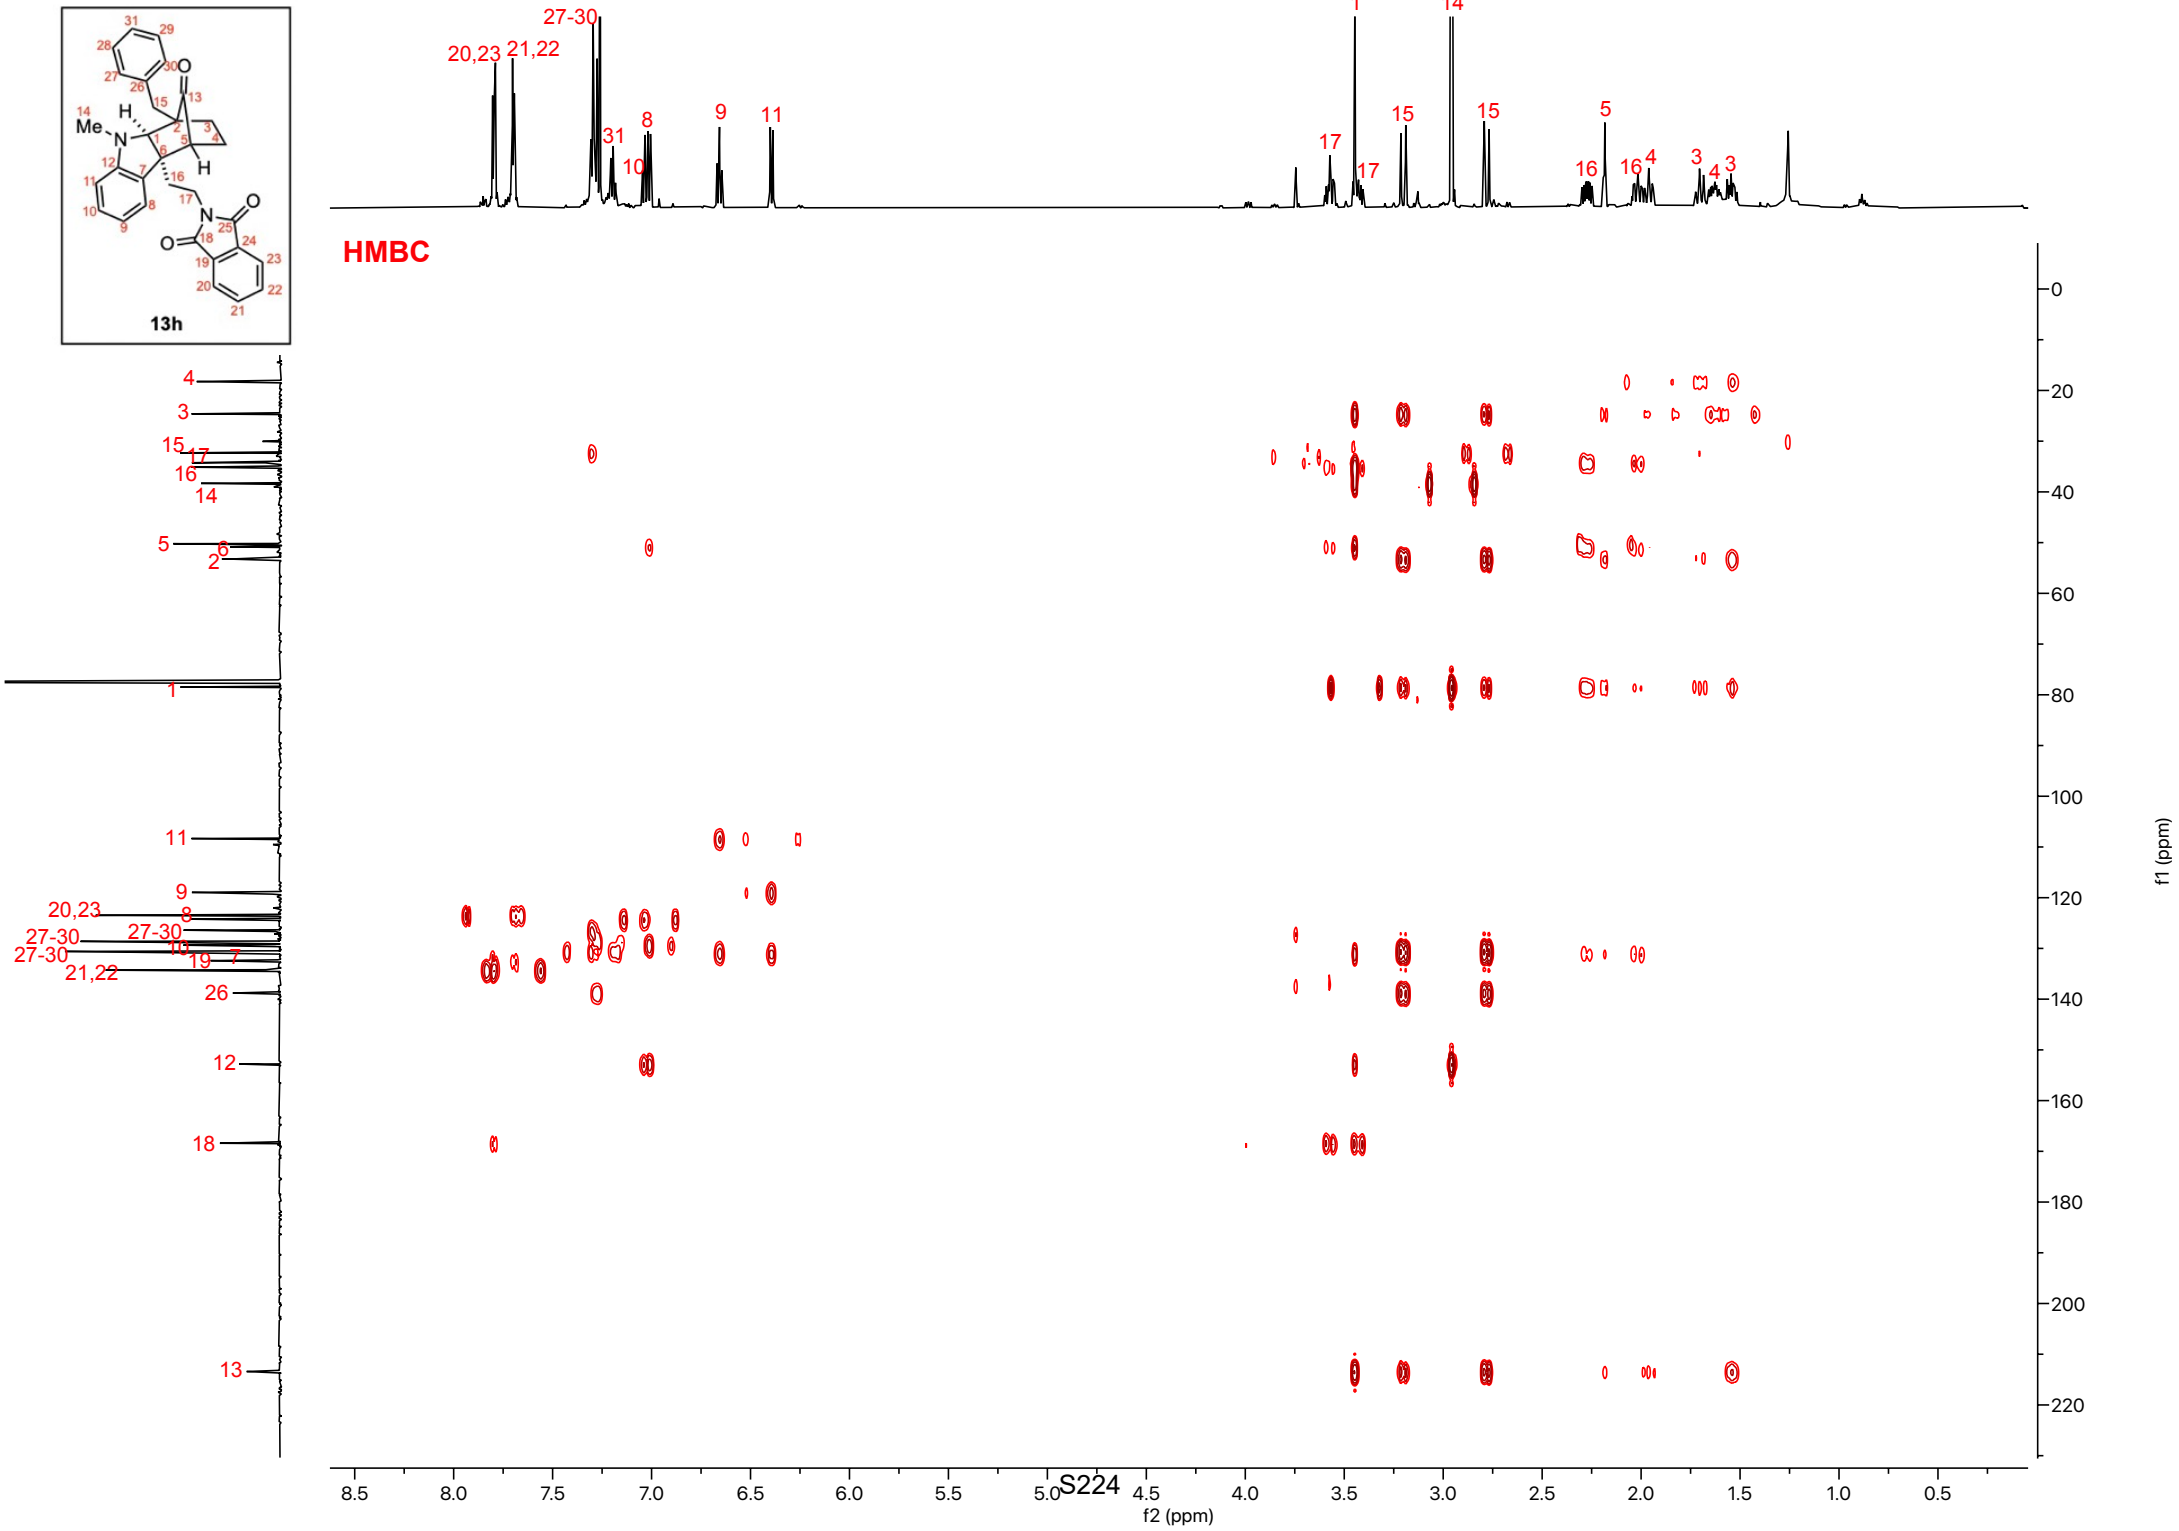

7.68  
7.67  
7.67  
7.66  
7.65  
7.63  
7.62  
7.62  
7.61  
7.61

6.82  
6.81  
6.80  
6.79  
  
6.38  
6.38  
6.37  
6.37  
6.35  
6.35  
6.25  
6.24

4.23  
4.22  
4.21  
4.21  
4.20  
4.20  
4.19  
4.18  
4.18  
4.17  
4.17  
4.16  
4.15  
3.98  
3.98

3.64  
3.63  
3.63  
3.62  
3.61  
3.54  
3.54  
3.53  
3.52  
3.52  
3.51  
3.50  
2.67  
2.64  
2.60  
2.58  
2.46  
2.44  
2.43  
2.43  
2.42  
2.40  
2.03  
2.02  
1.99  
1.98  
1.97  
1.96  
1.95  
1.70  
1.69  
1.68  
1.68  
1.67  
1.66  
1.63  
1.63  
1.62  
1.61  
1.61  
1.60  
1.60  
1.60  
1.60  
1.59  
1.58  
1.58  
1.58  
1.58  
1.58  
1.34  
1.33  
1.31  
1.31  
1.31  
1.30  
1.29  
1.28

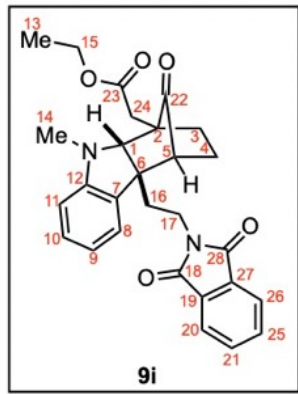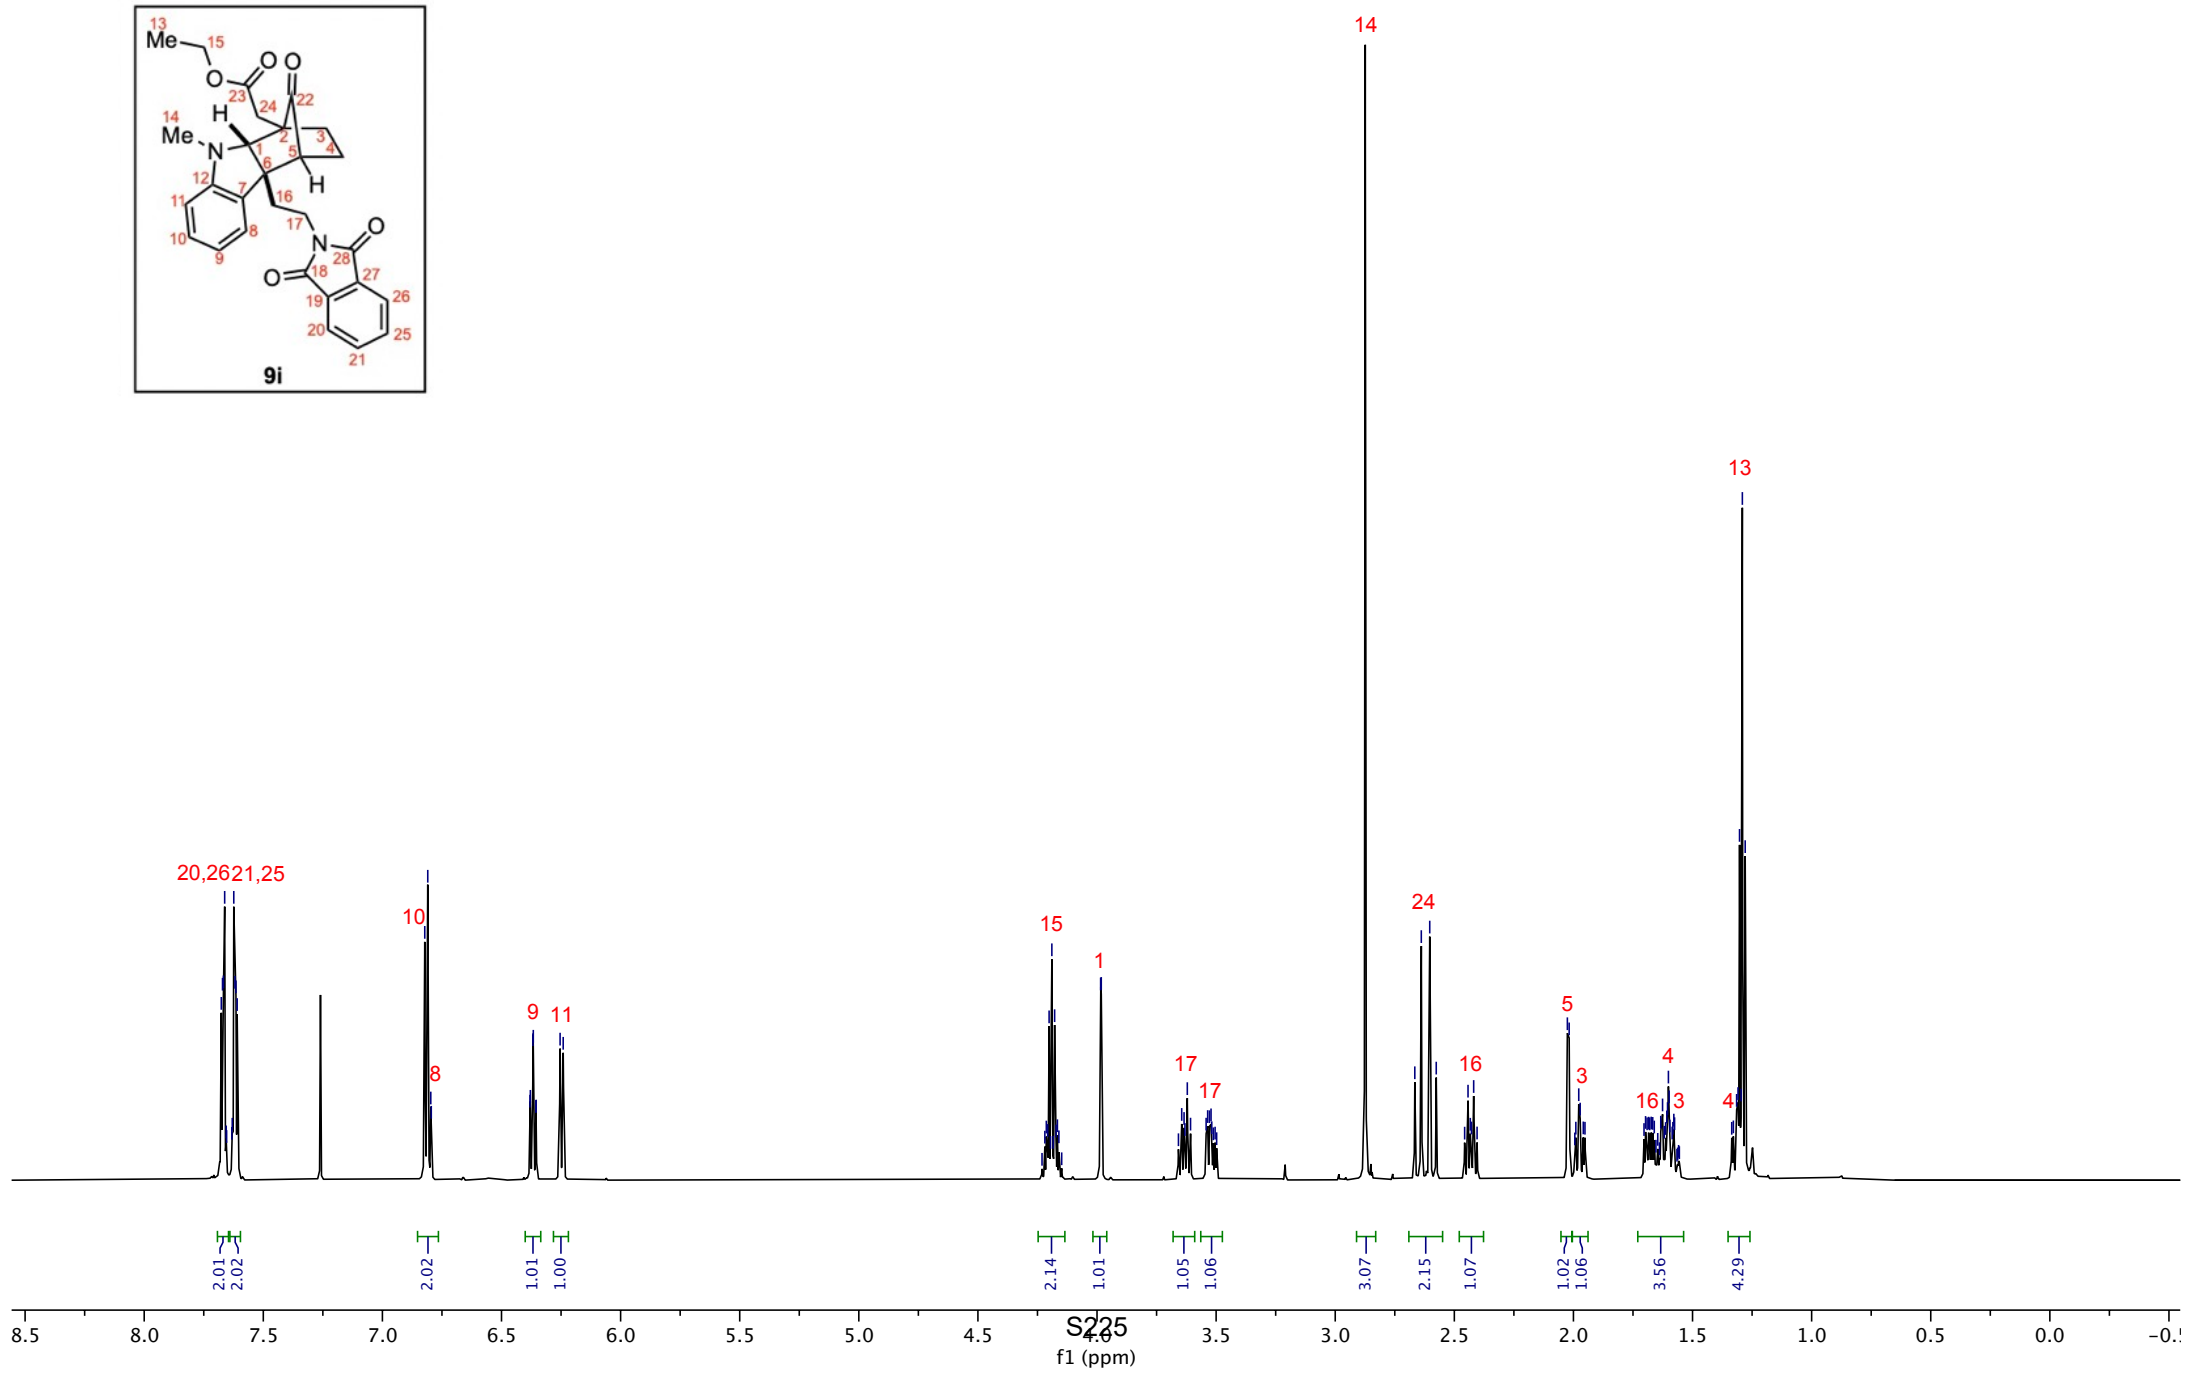

212.98  
212.96

171.38  
168.21  
168.20

154.51

133.86  
132.34  
128.79  
124.44  
123.19

117.55  
117.54

106.27

71.89

60.91

51.33  
49.94  
49.54

36.29  
35.29  
35.27  
34.22  
33.80

22.38  
19.32

14.55

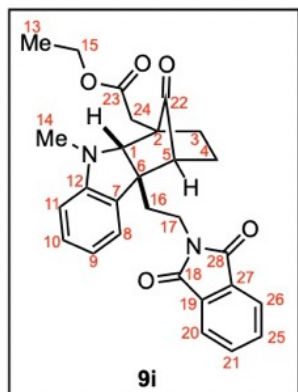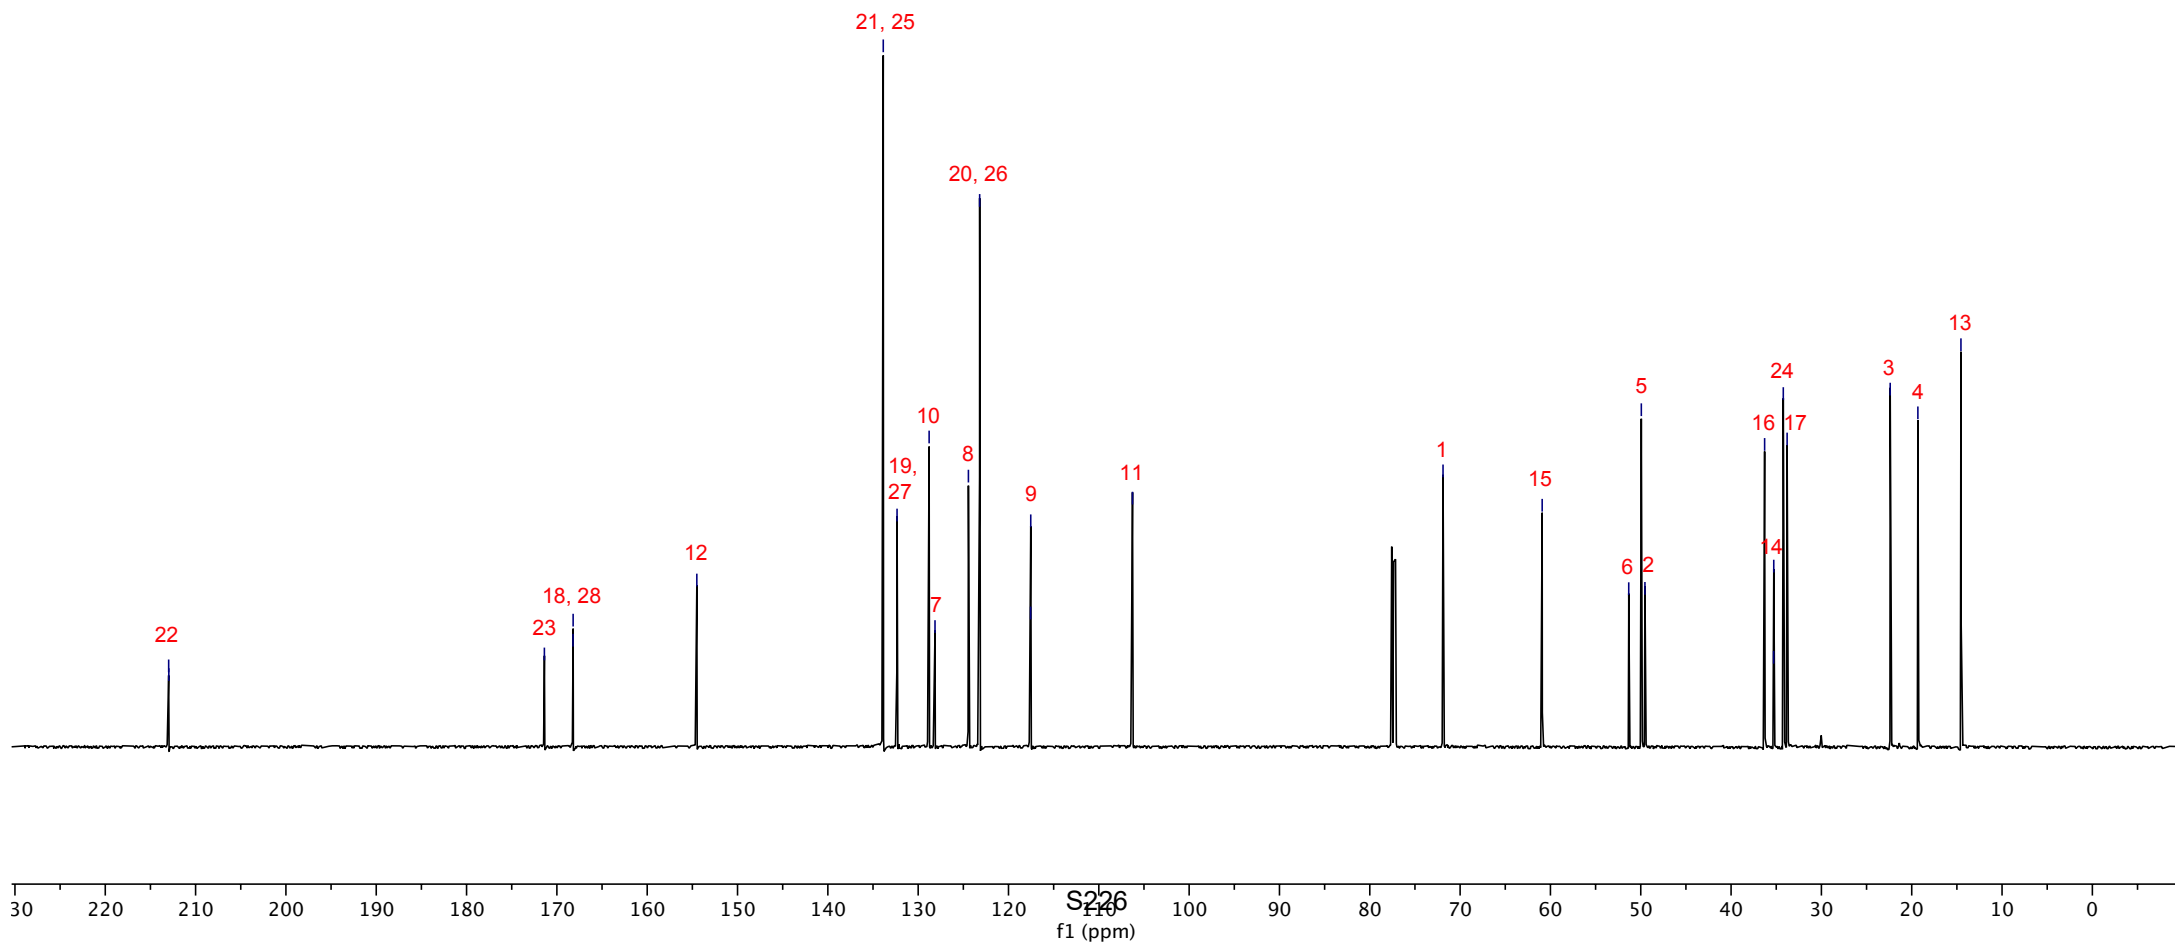

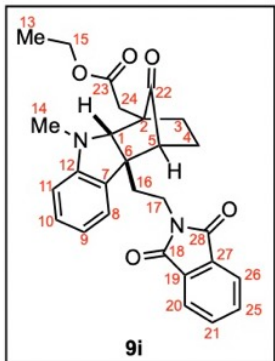

COSY

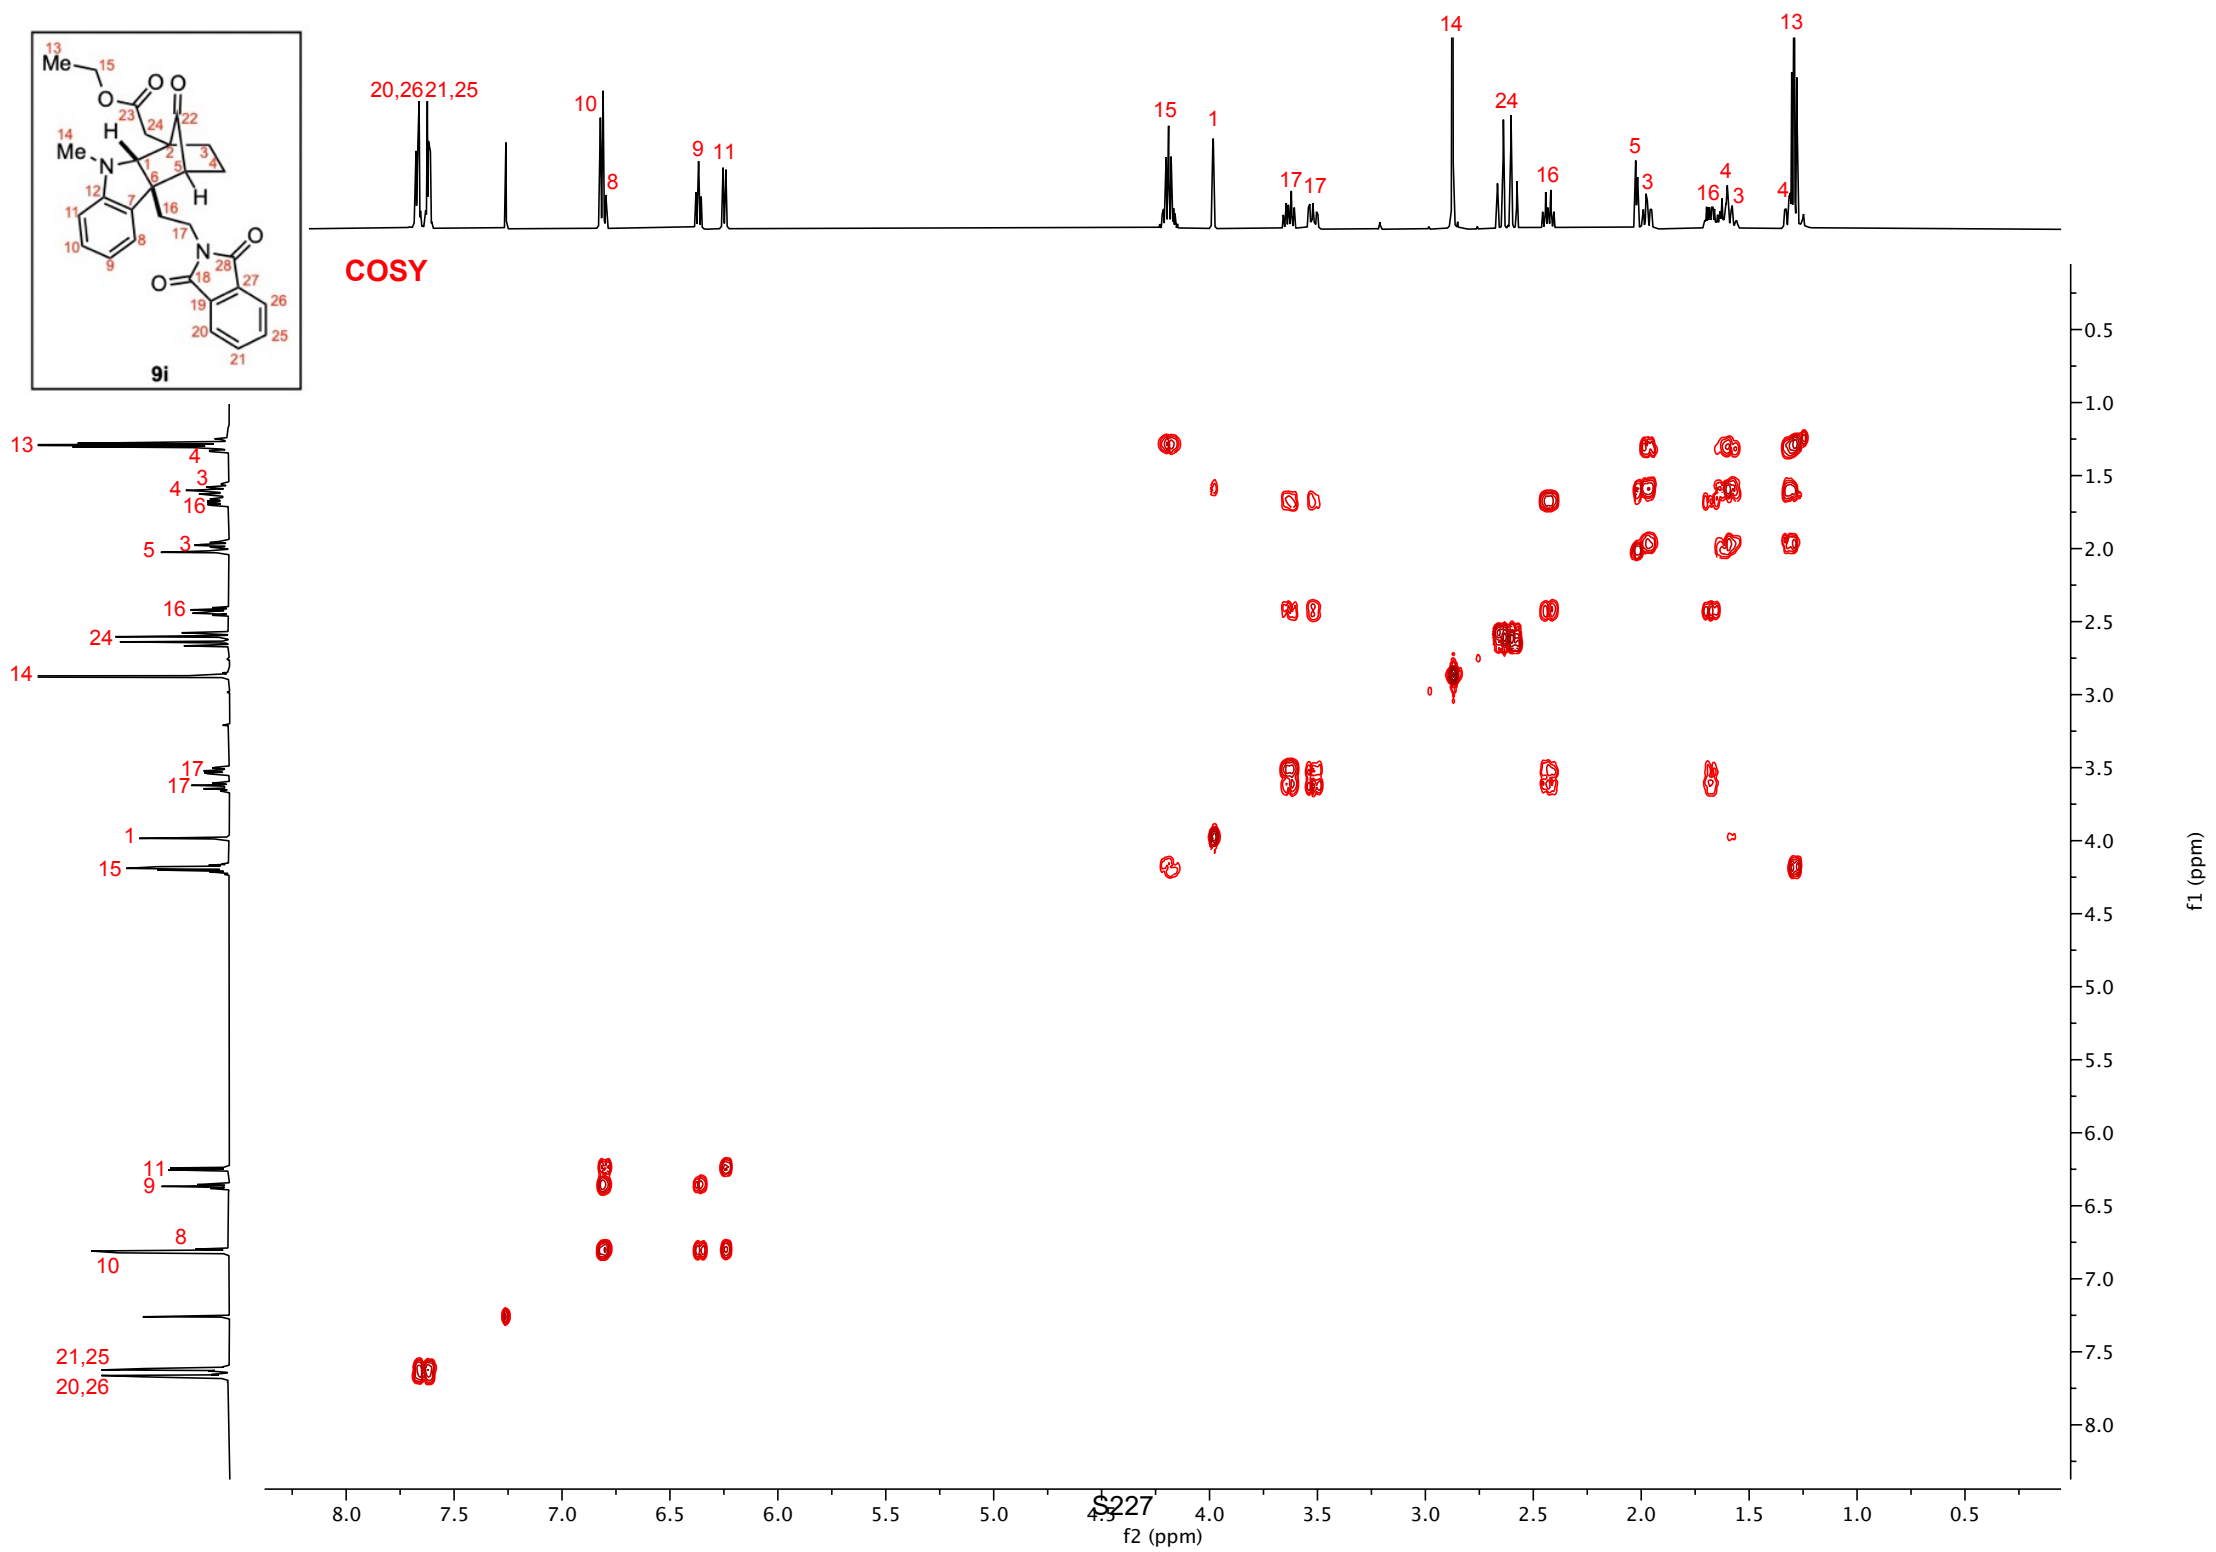

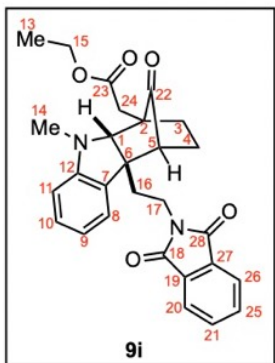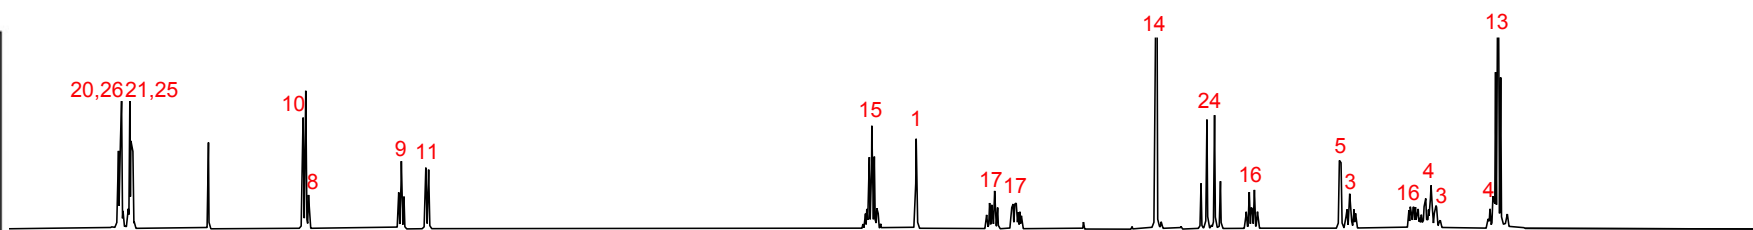

**HSQC**

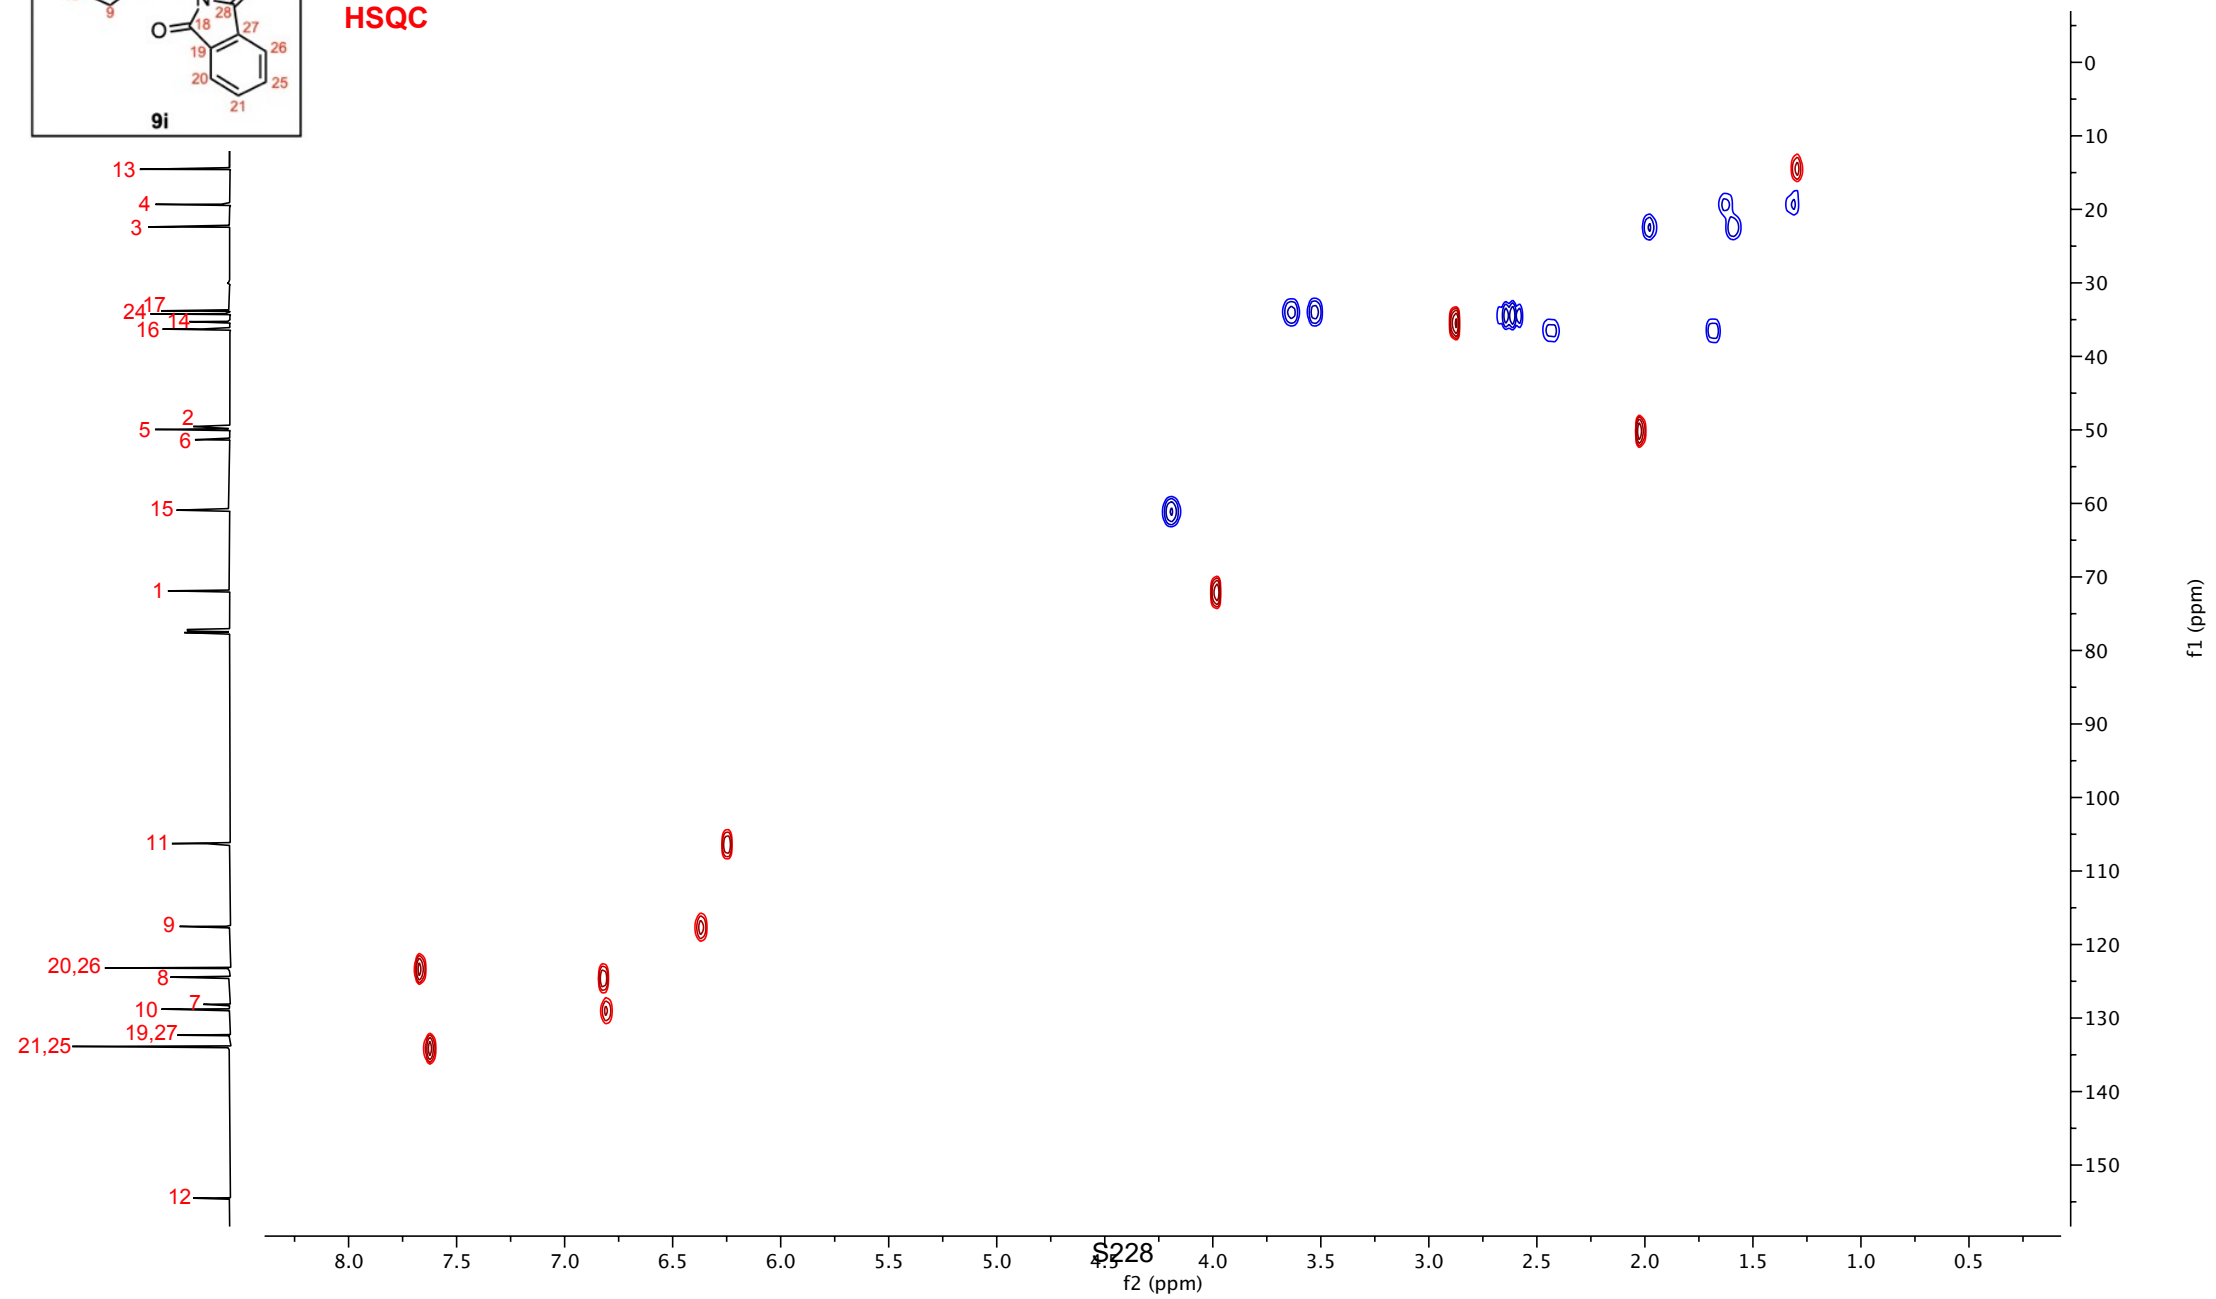

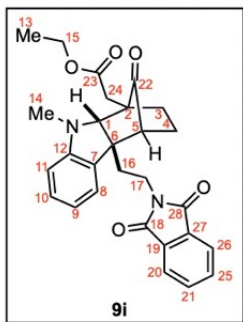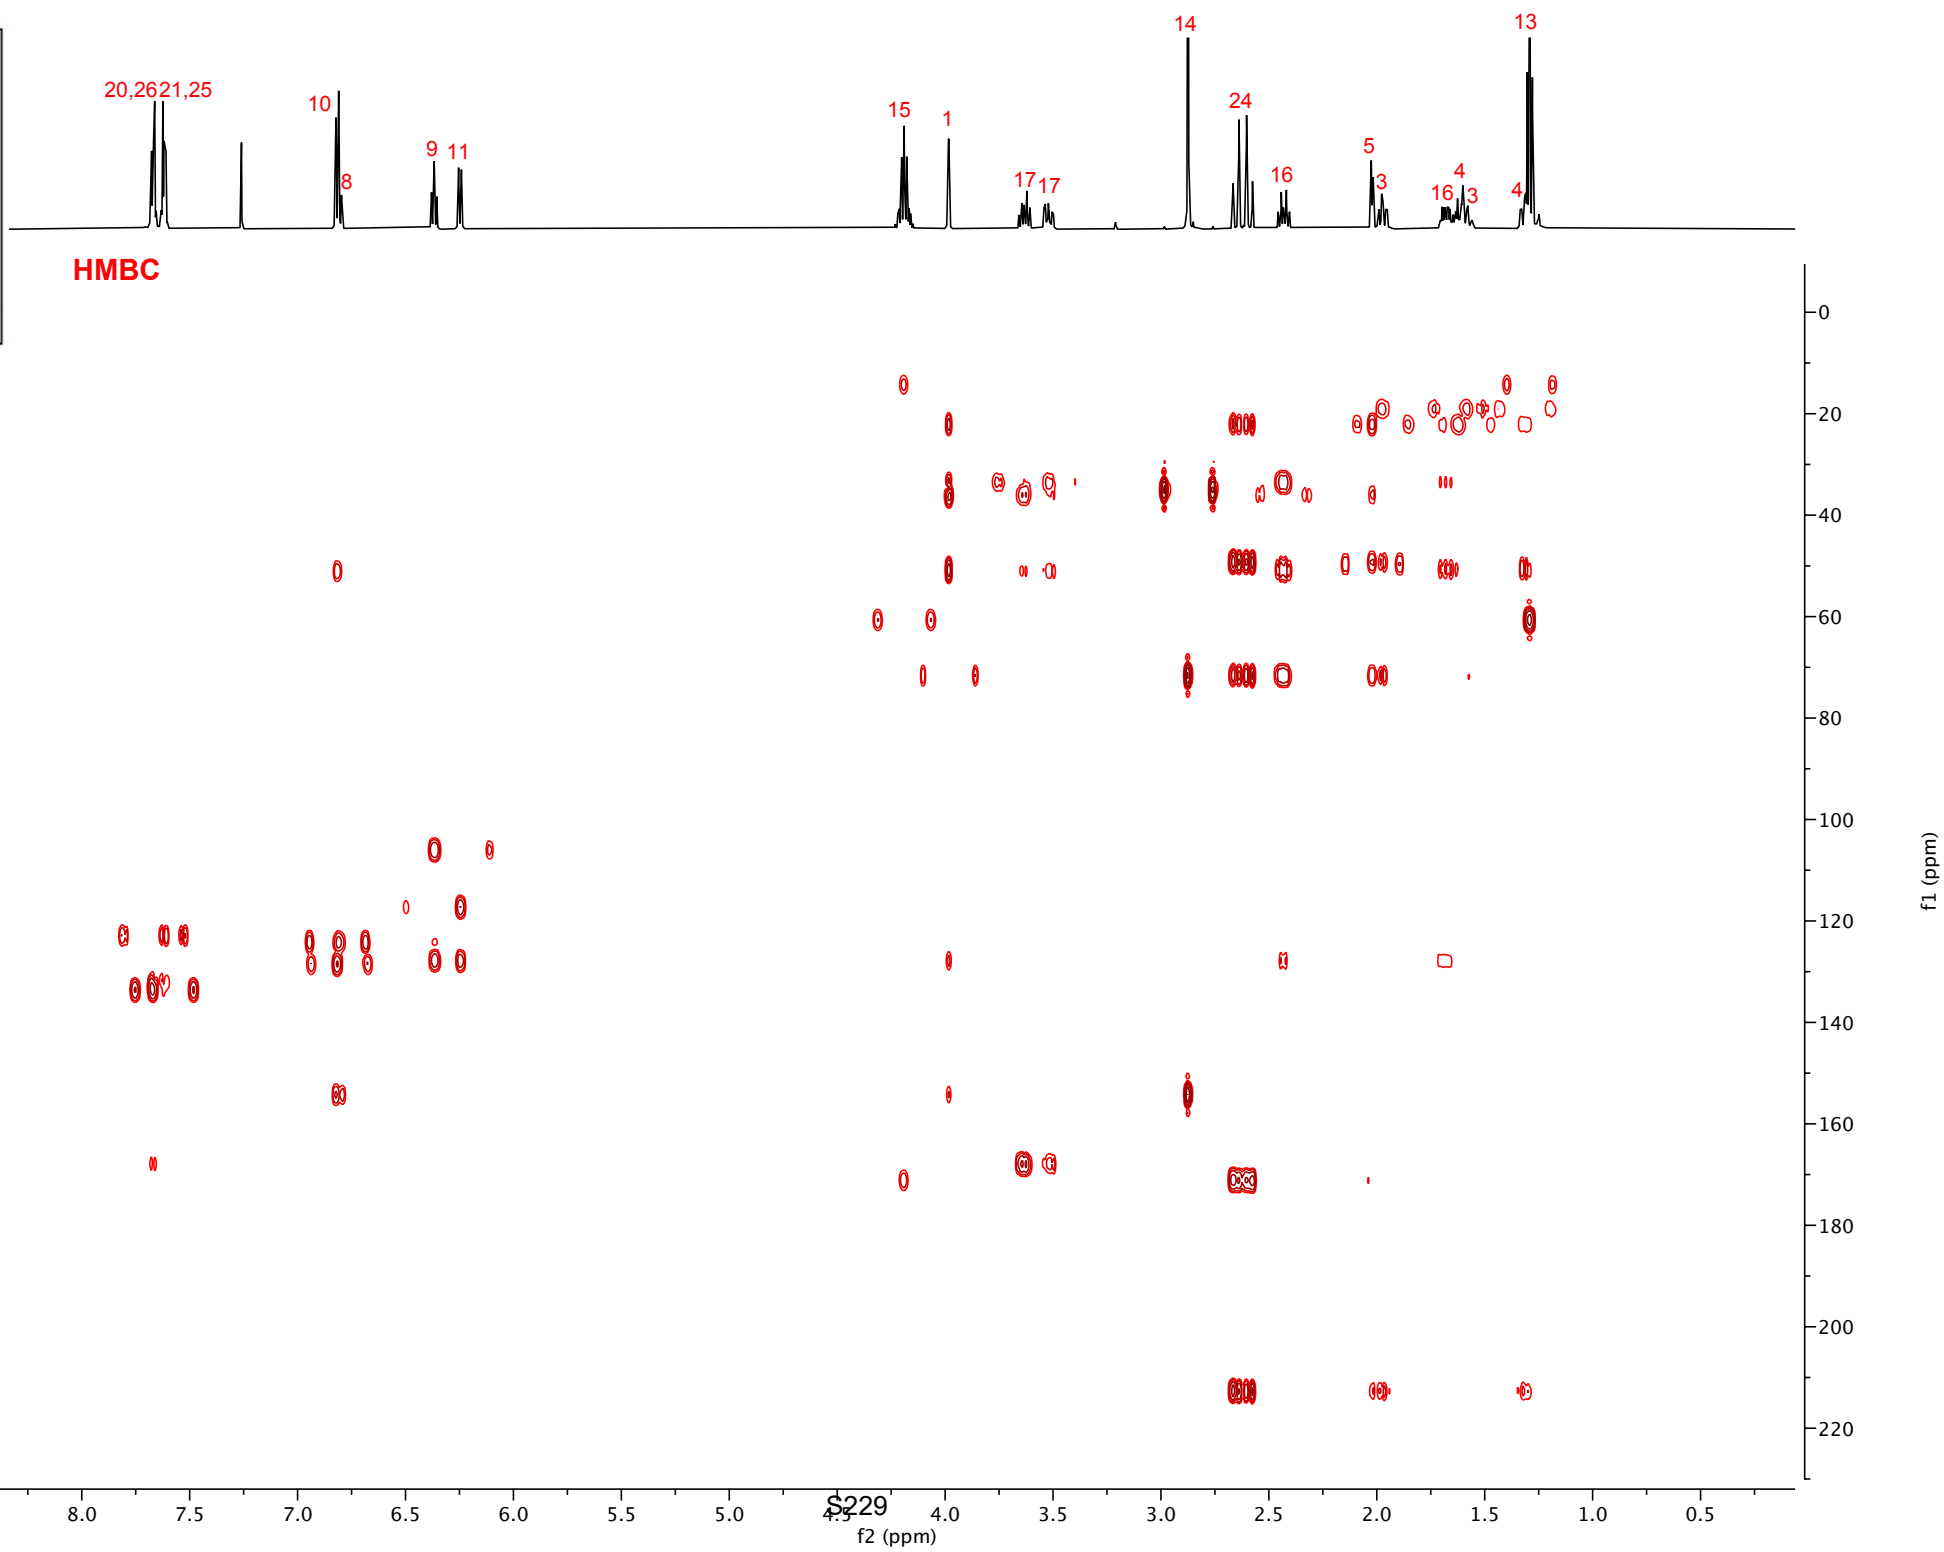

7.80  
7.79  
7.79  
7.79  
7.77  
7.77  
7.70  
7.70  
7.69  
7.69  
7.68  
7.67  
7.01  
7.01  
7.00  
7.00  
6.99  
6.99  
6.64  
6.64  
6.63  
6.62  
6.61  
6.61  
6.37  
6.36  
6.36

4.20  
4.20  
4.19  
4.19  
4.19  
4.18  
4.17  
4.17  
4.16  
4.16  
3.64  
3.63  
3.62  
3.62  
3.61  
3.61  
3.60  
3.60  
3.47  
3.46  
3.46  
3.45  
3.45  
3.44  
3.44  
3.43  
3.42  
2.92  
2.76  
2.73  
2.47  
2.44  
2.30  
2.29  
2.28  
2.28  
2.27  
2.27  
2.26  
2.25  
2.23  
2.22  
2.08  
2.07  
2.06  
2.06  
2.05  
2.05  
2.04  
2.04  
2.04  
2.03  
2.02  
2.02  
1.94  
1.94  
1.93  
1.93  
1.92  
1.92  
1.91  
1.87  
1.85  
1.84  
1.83  
1.82  
1.82  
1.81  
1.81  
1.80  
1.79  
1.79

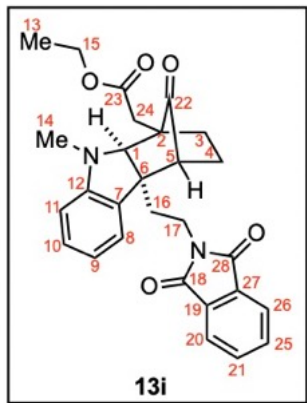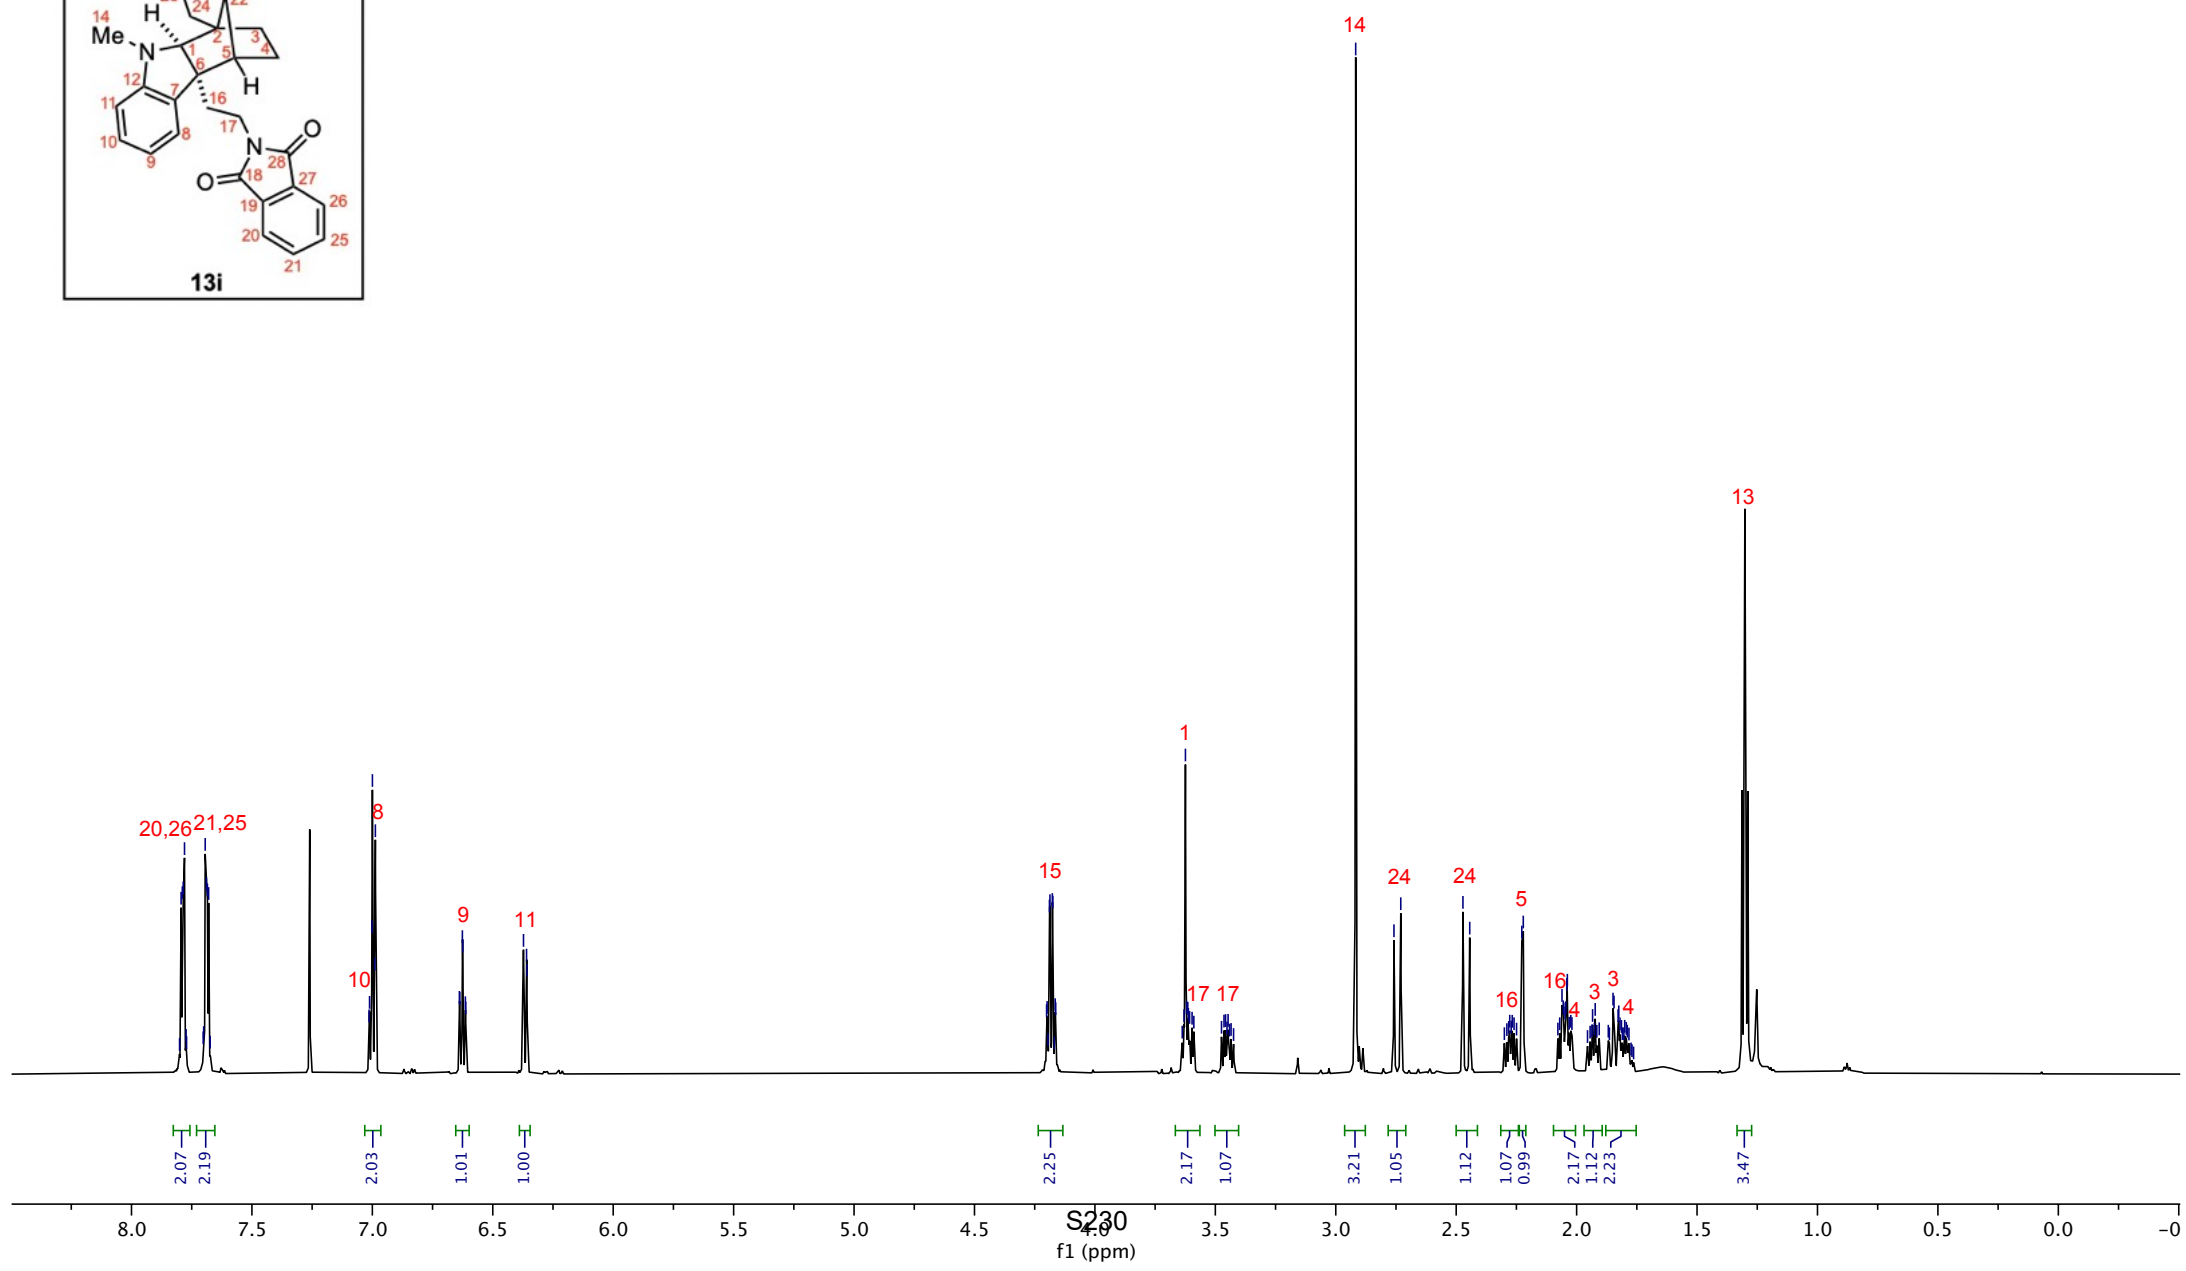

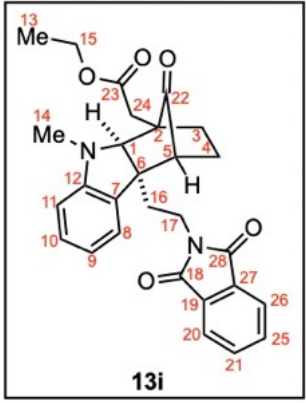

— 212.48

— 172.39

— 168.35

— 152.69

— 134.23

— 132.40

— 130.99

— 129.38

— 124.27

— 123.46

— 119.06

— 108.61

— 76.28

— 60.84

— 50.99

— 49.90

— 49.54

— 37.63

— 35.02

— 34.25

— 31.38

— 25.53

— 18.13

— 14.61

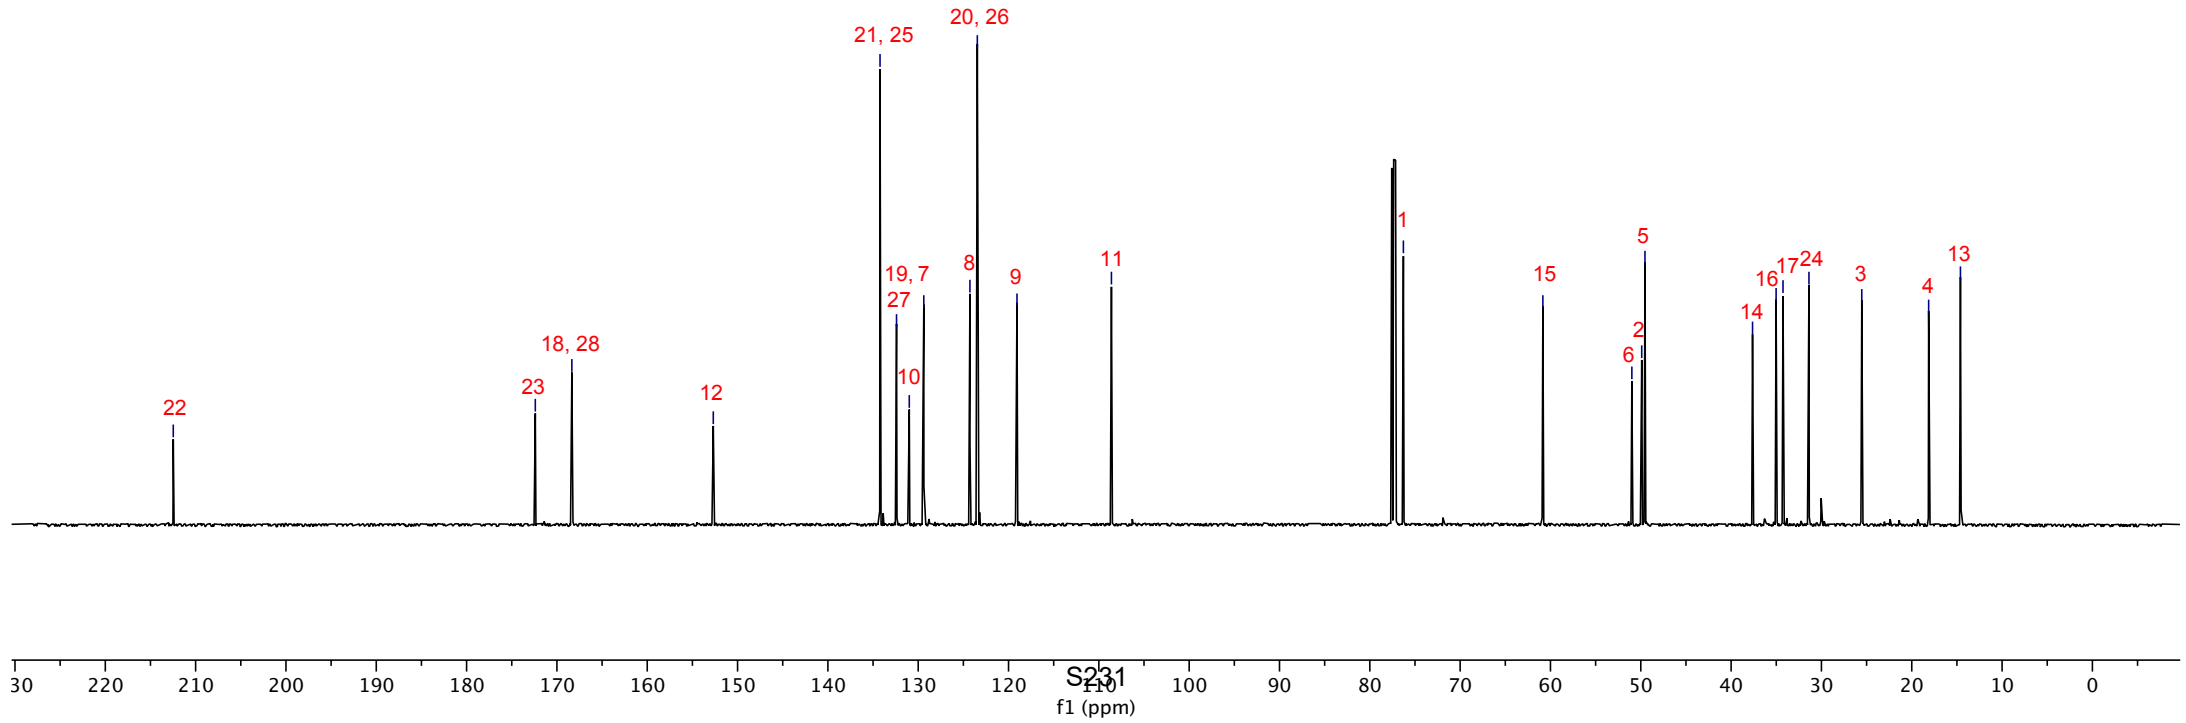



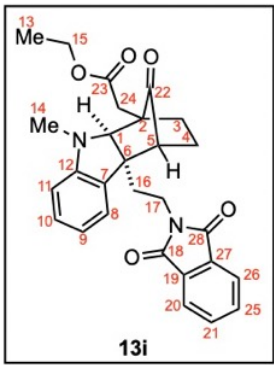

**COSY**

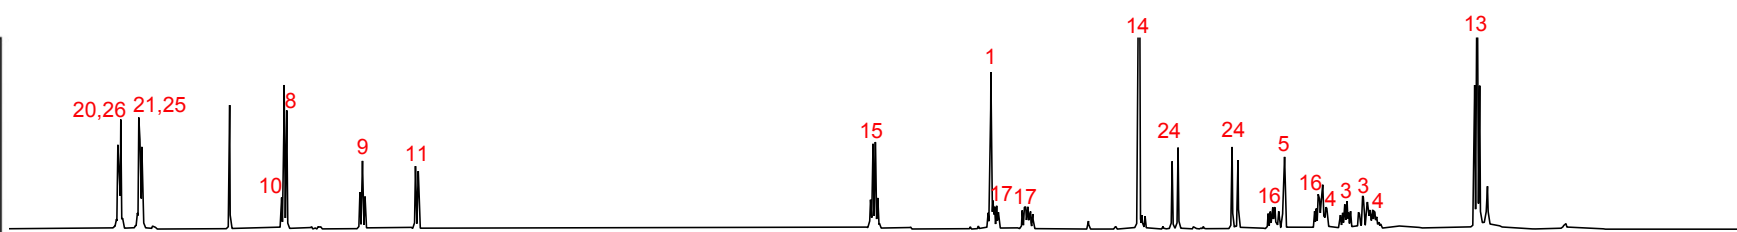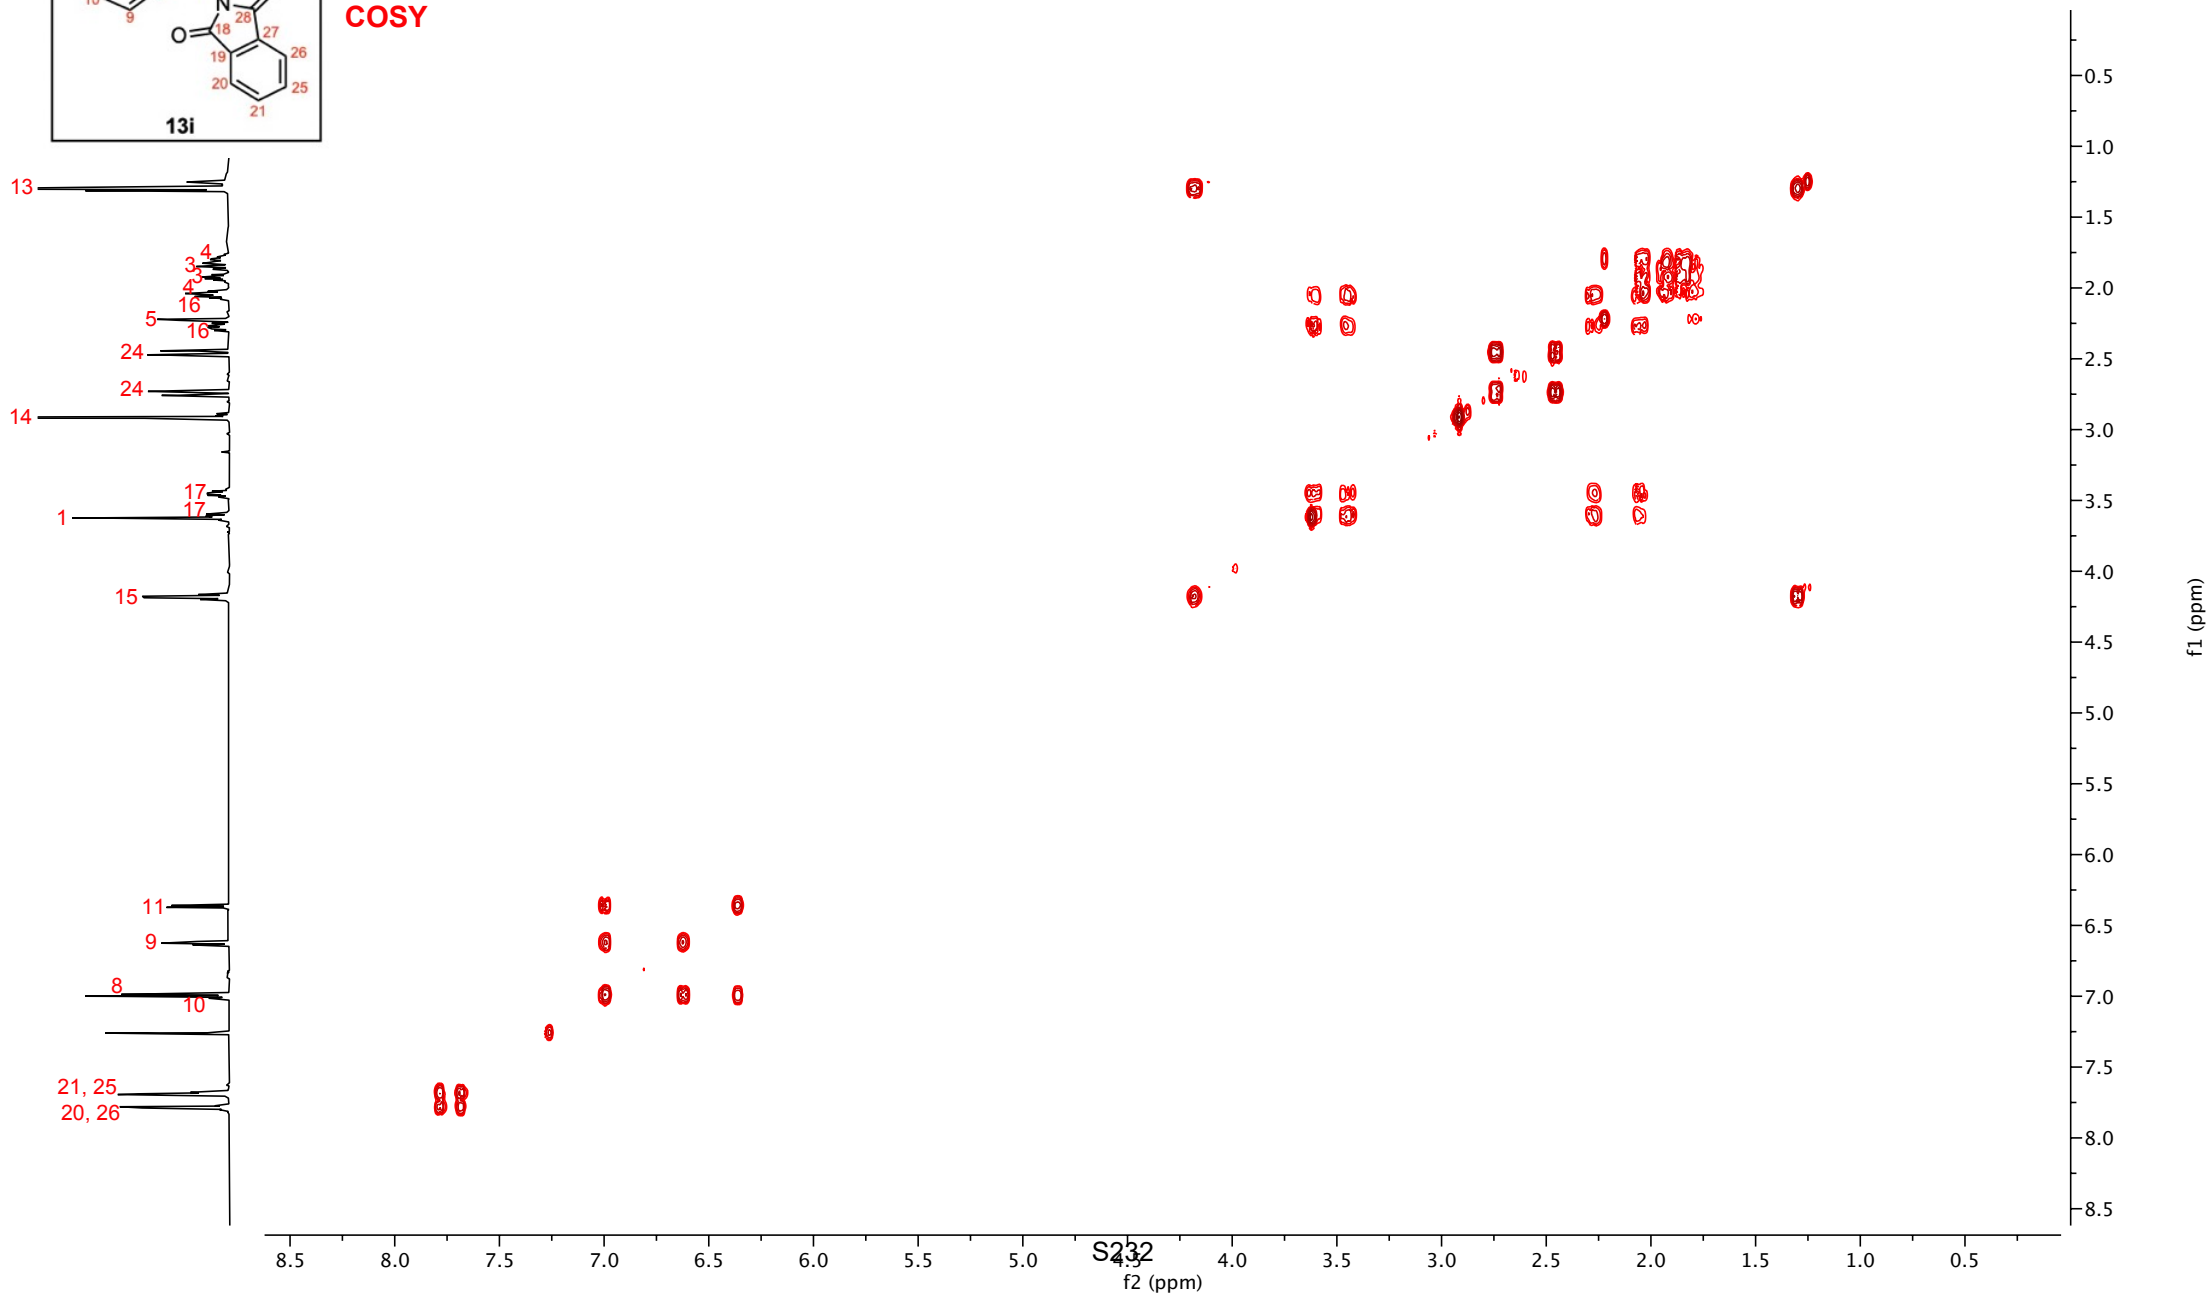

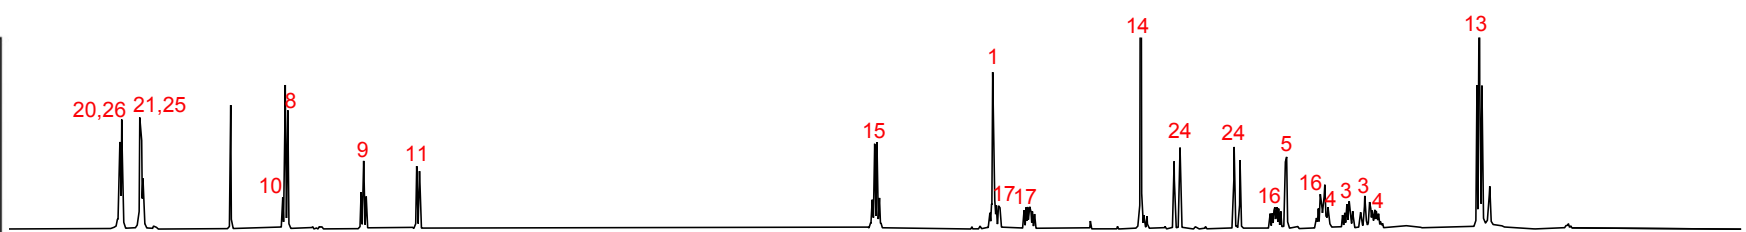

**HSQC**

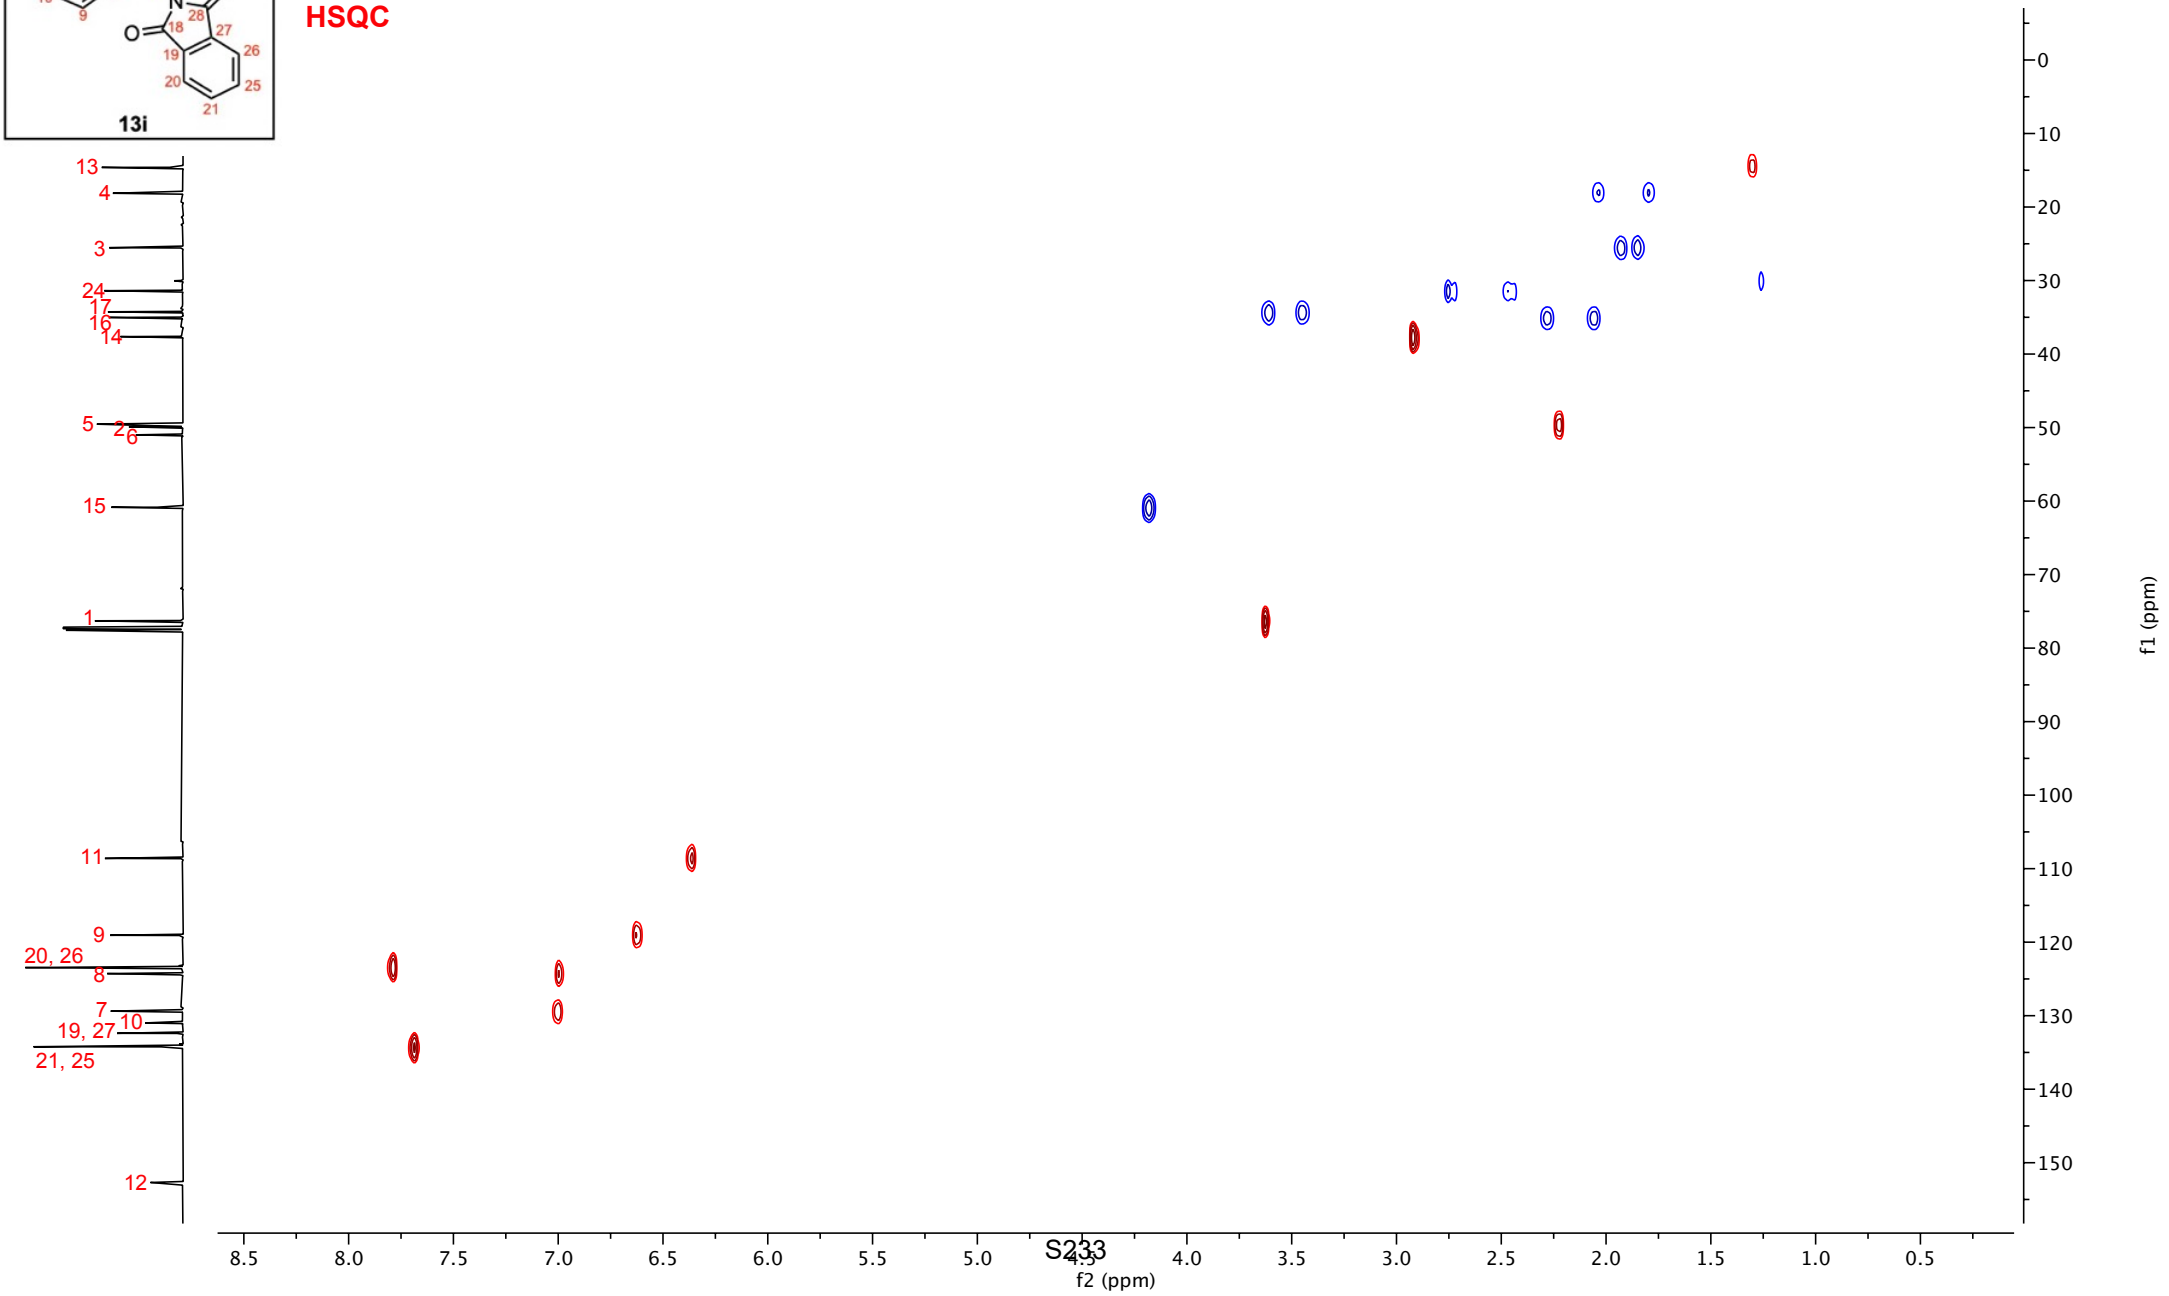

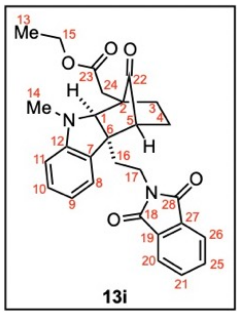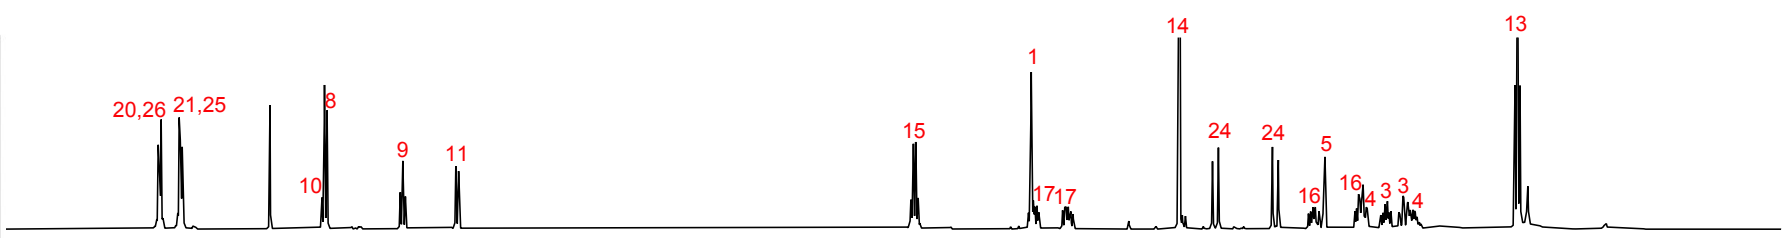

**HMBC**

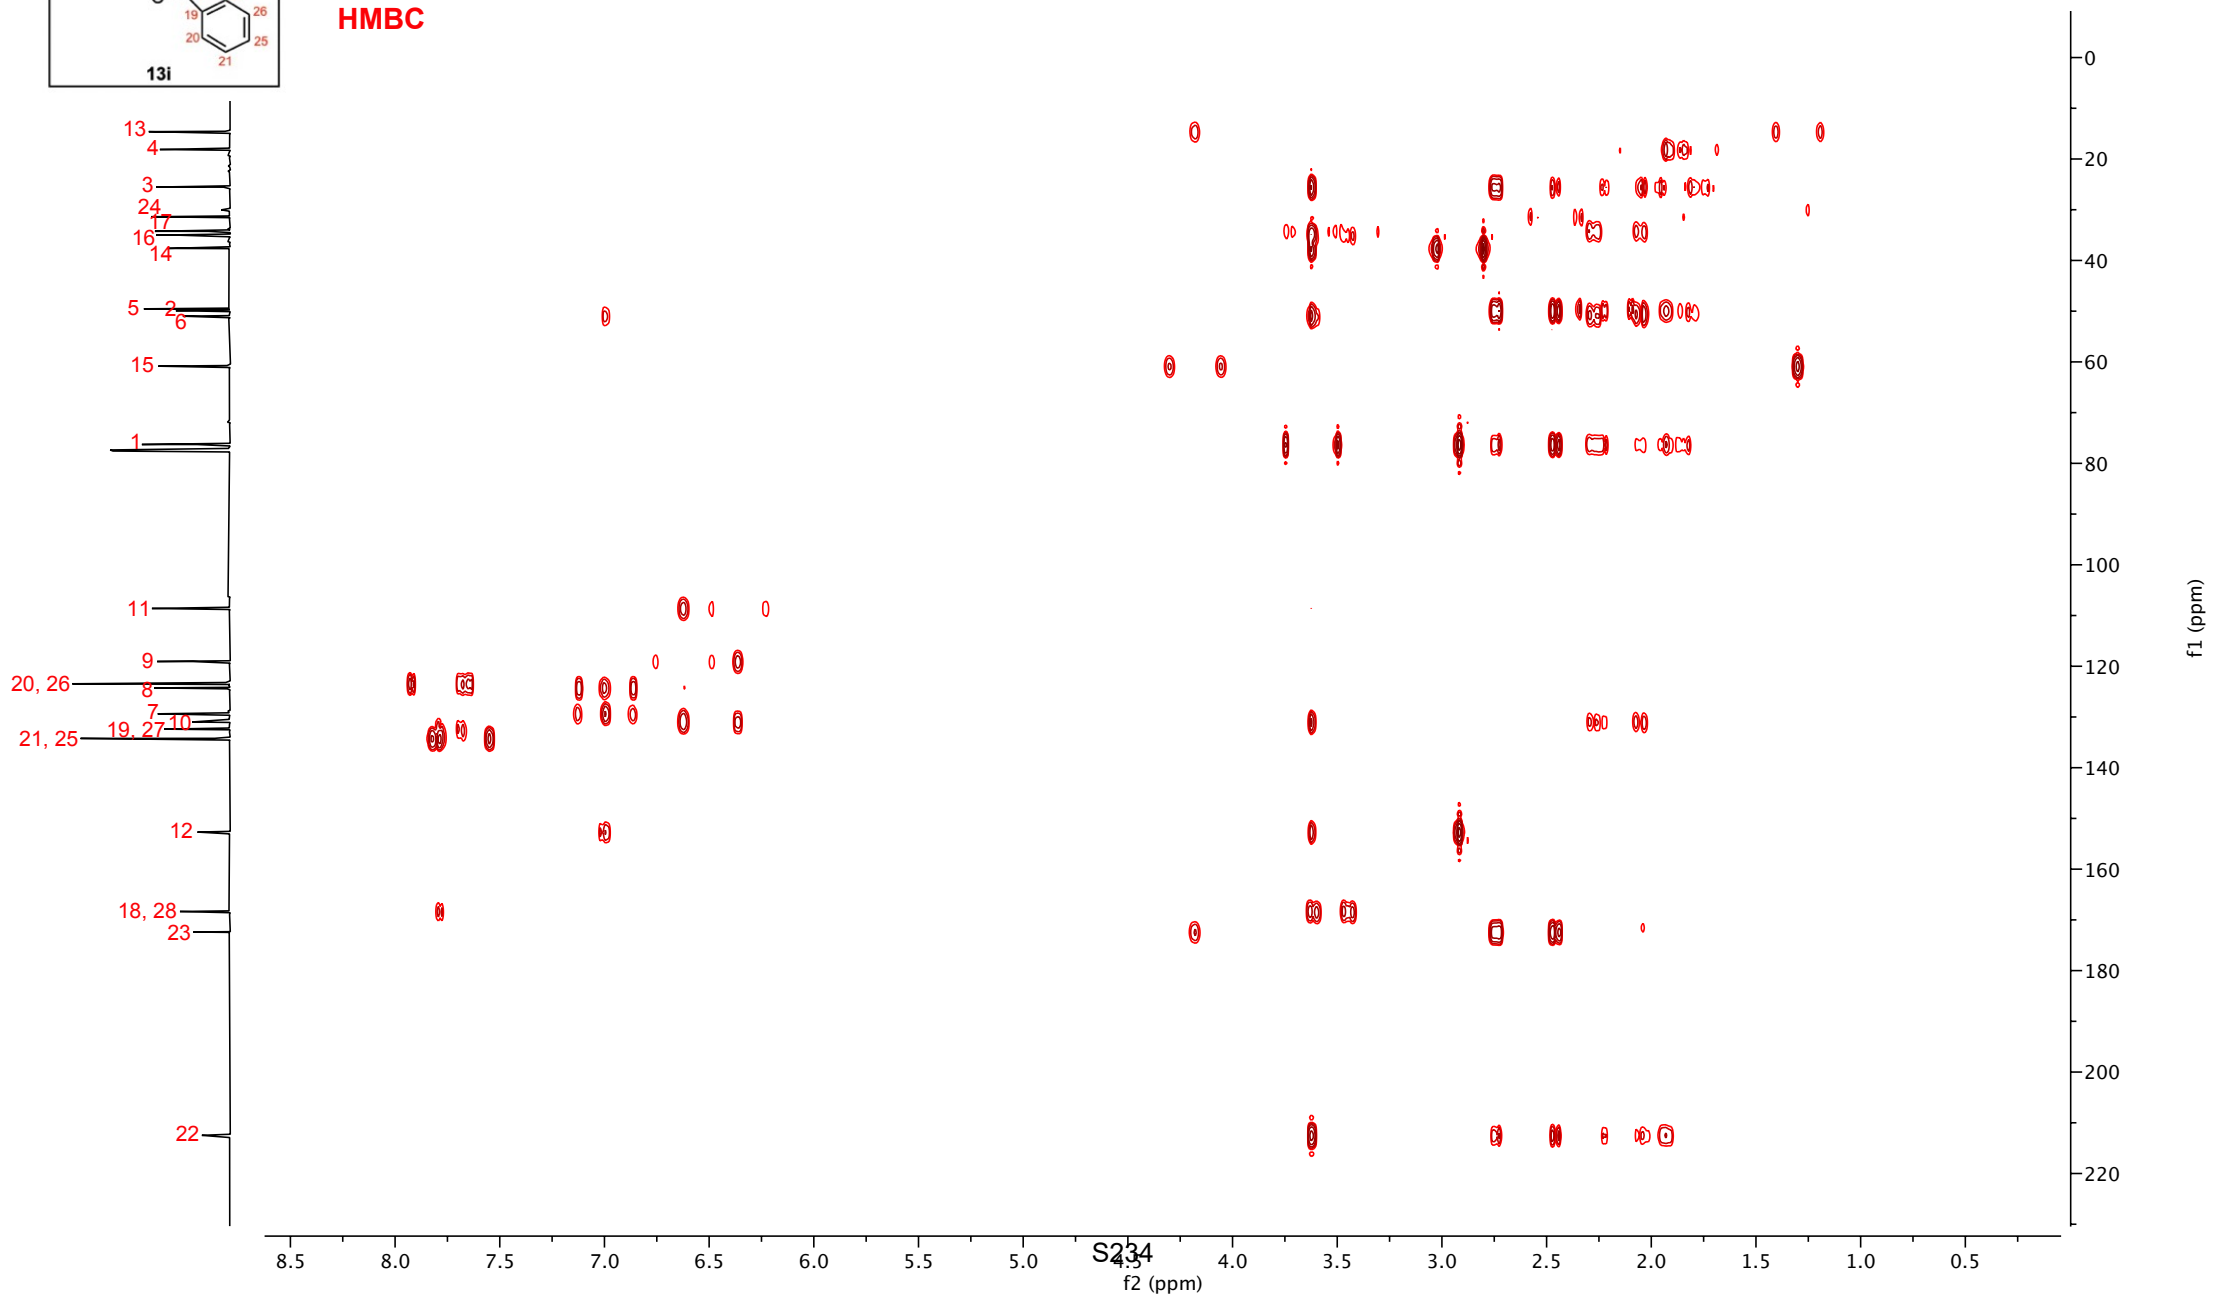

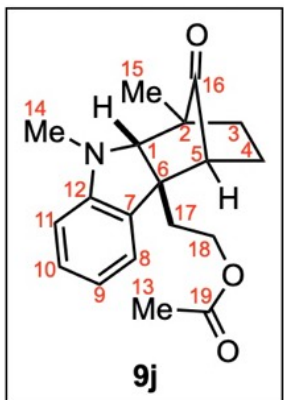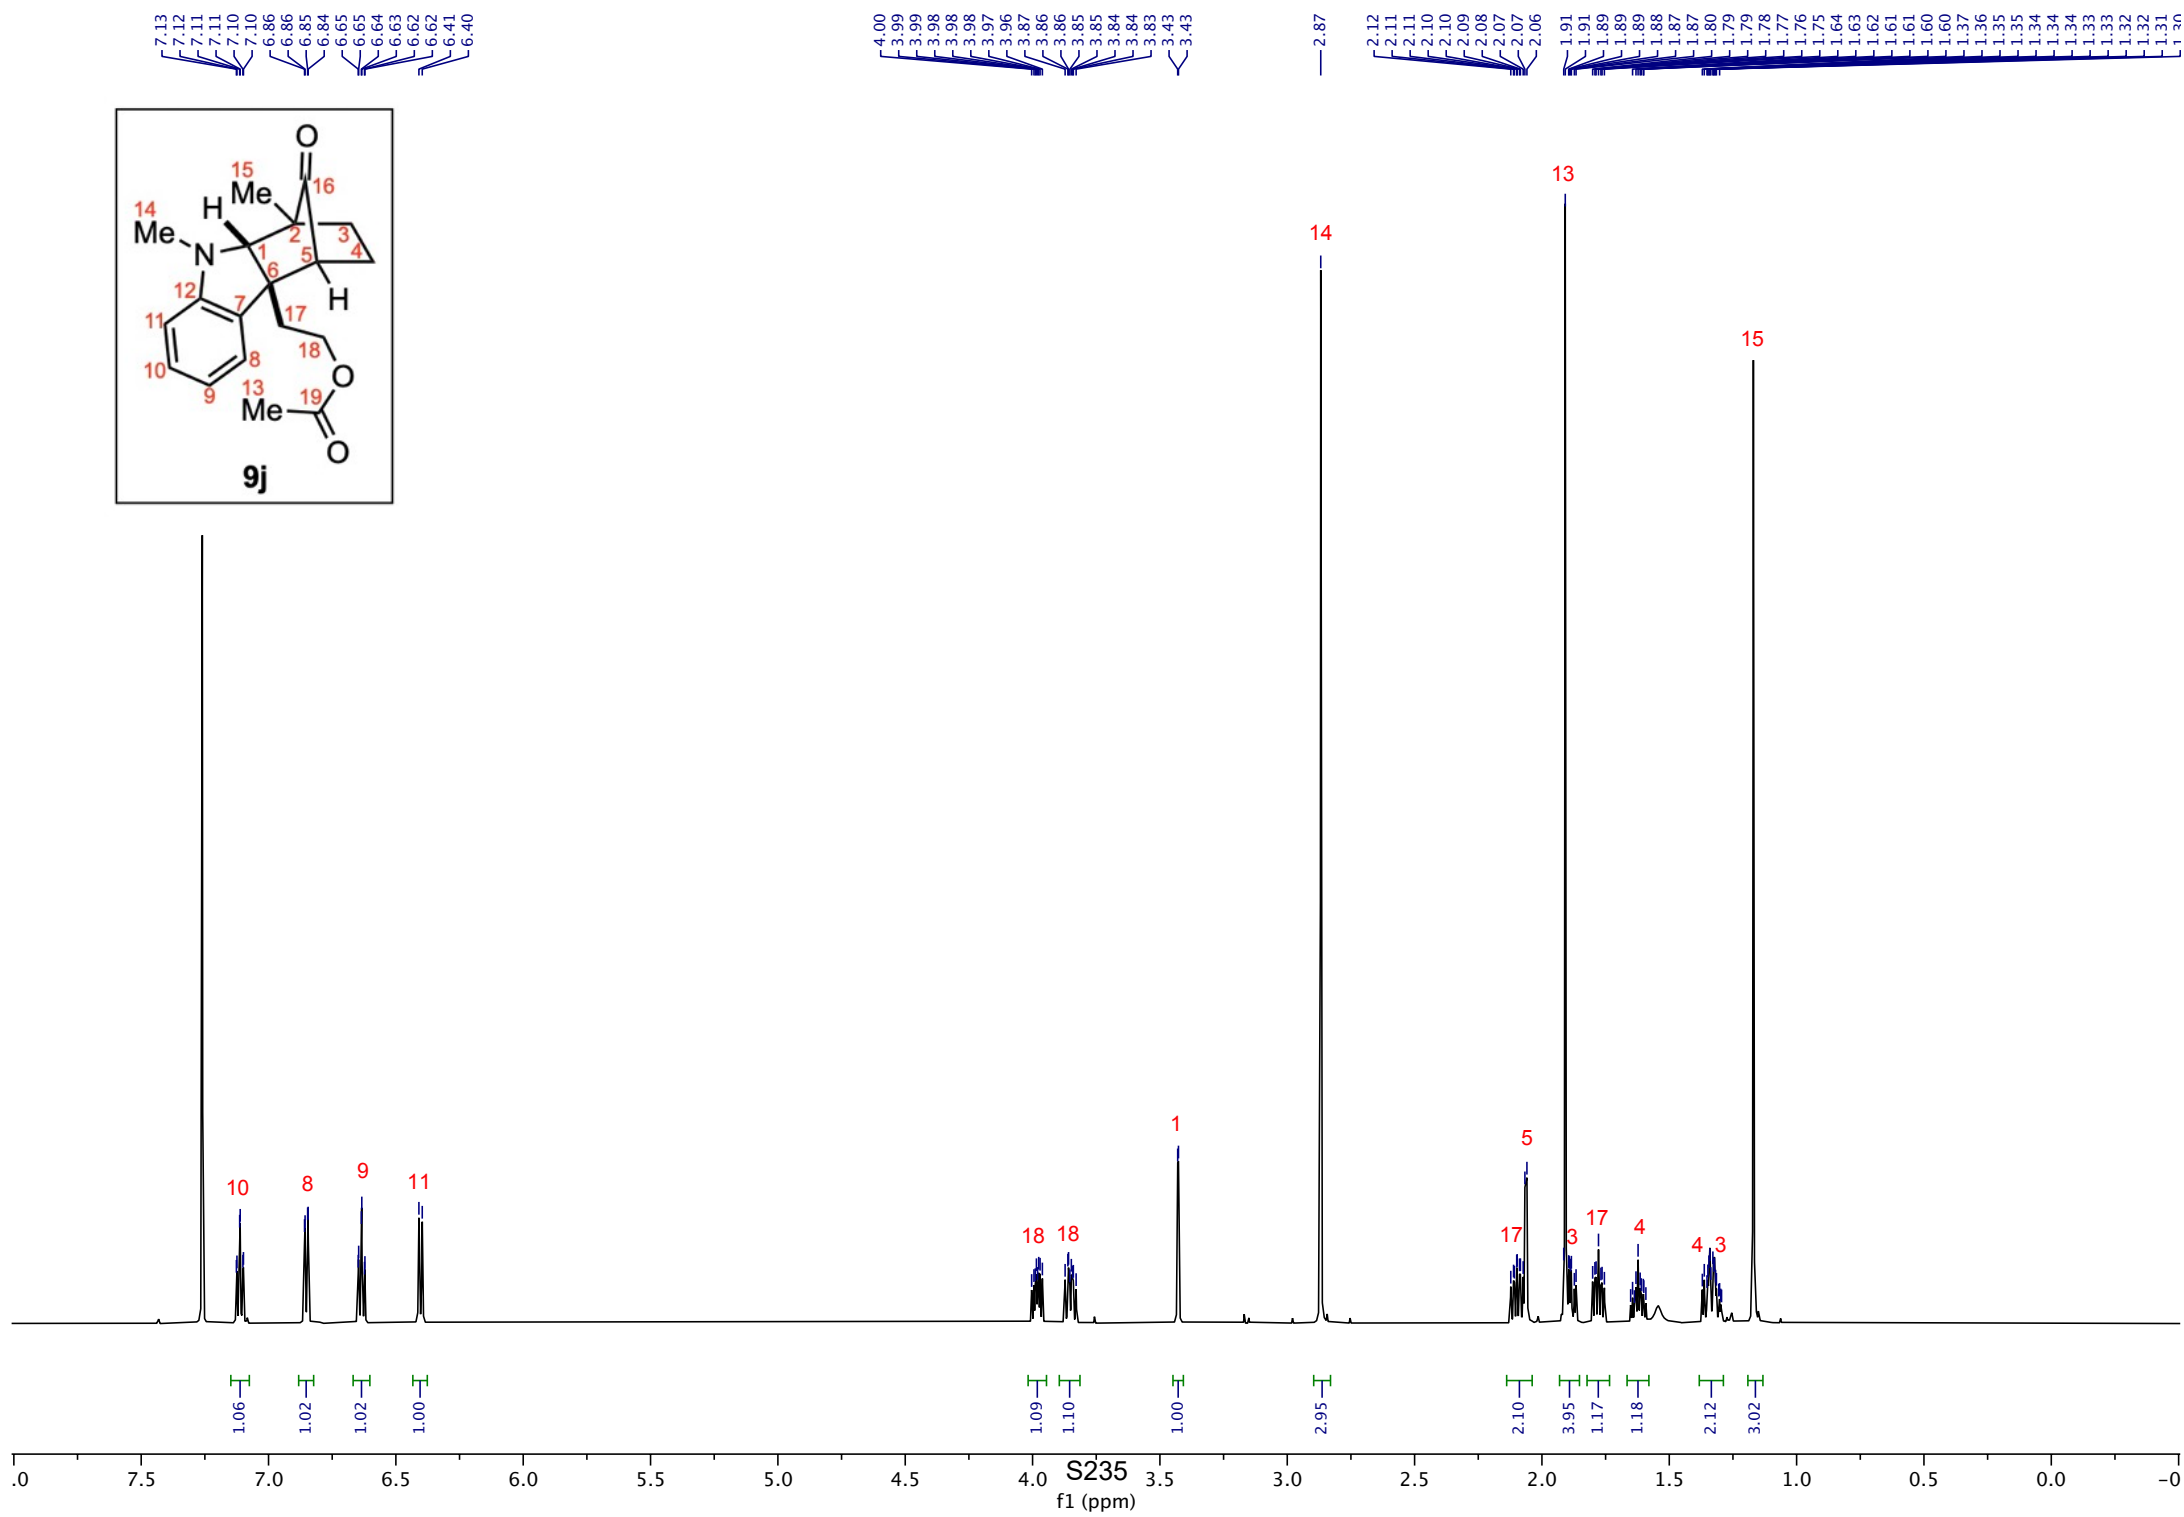

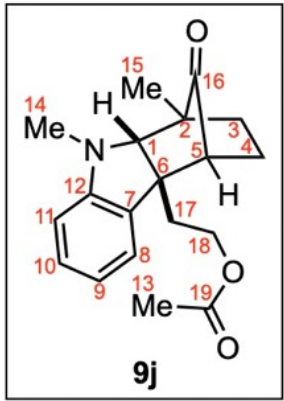

— 215.57 — 171.13 — 154.29 — 129.26 — 128.81 — 124.87 — 117.54 — 106.20 — 74.80 — 61.08 — 50.88 — 49.92 — 47.90 — 38.43 — 35.12 — 23.57 — 21.16 — 19.85 — 15.02

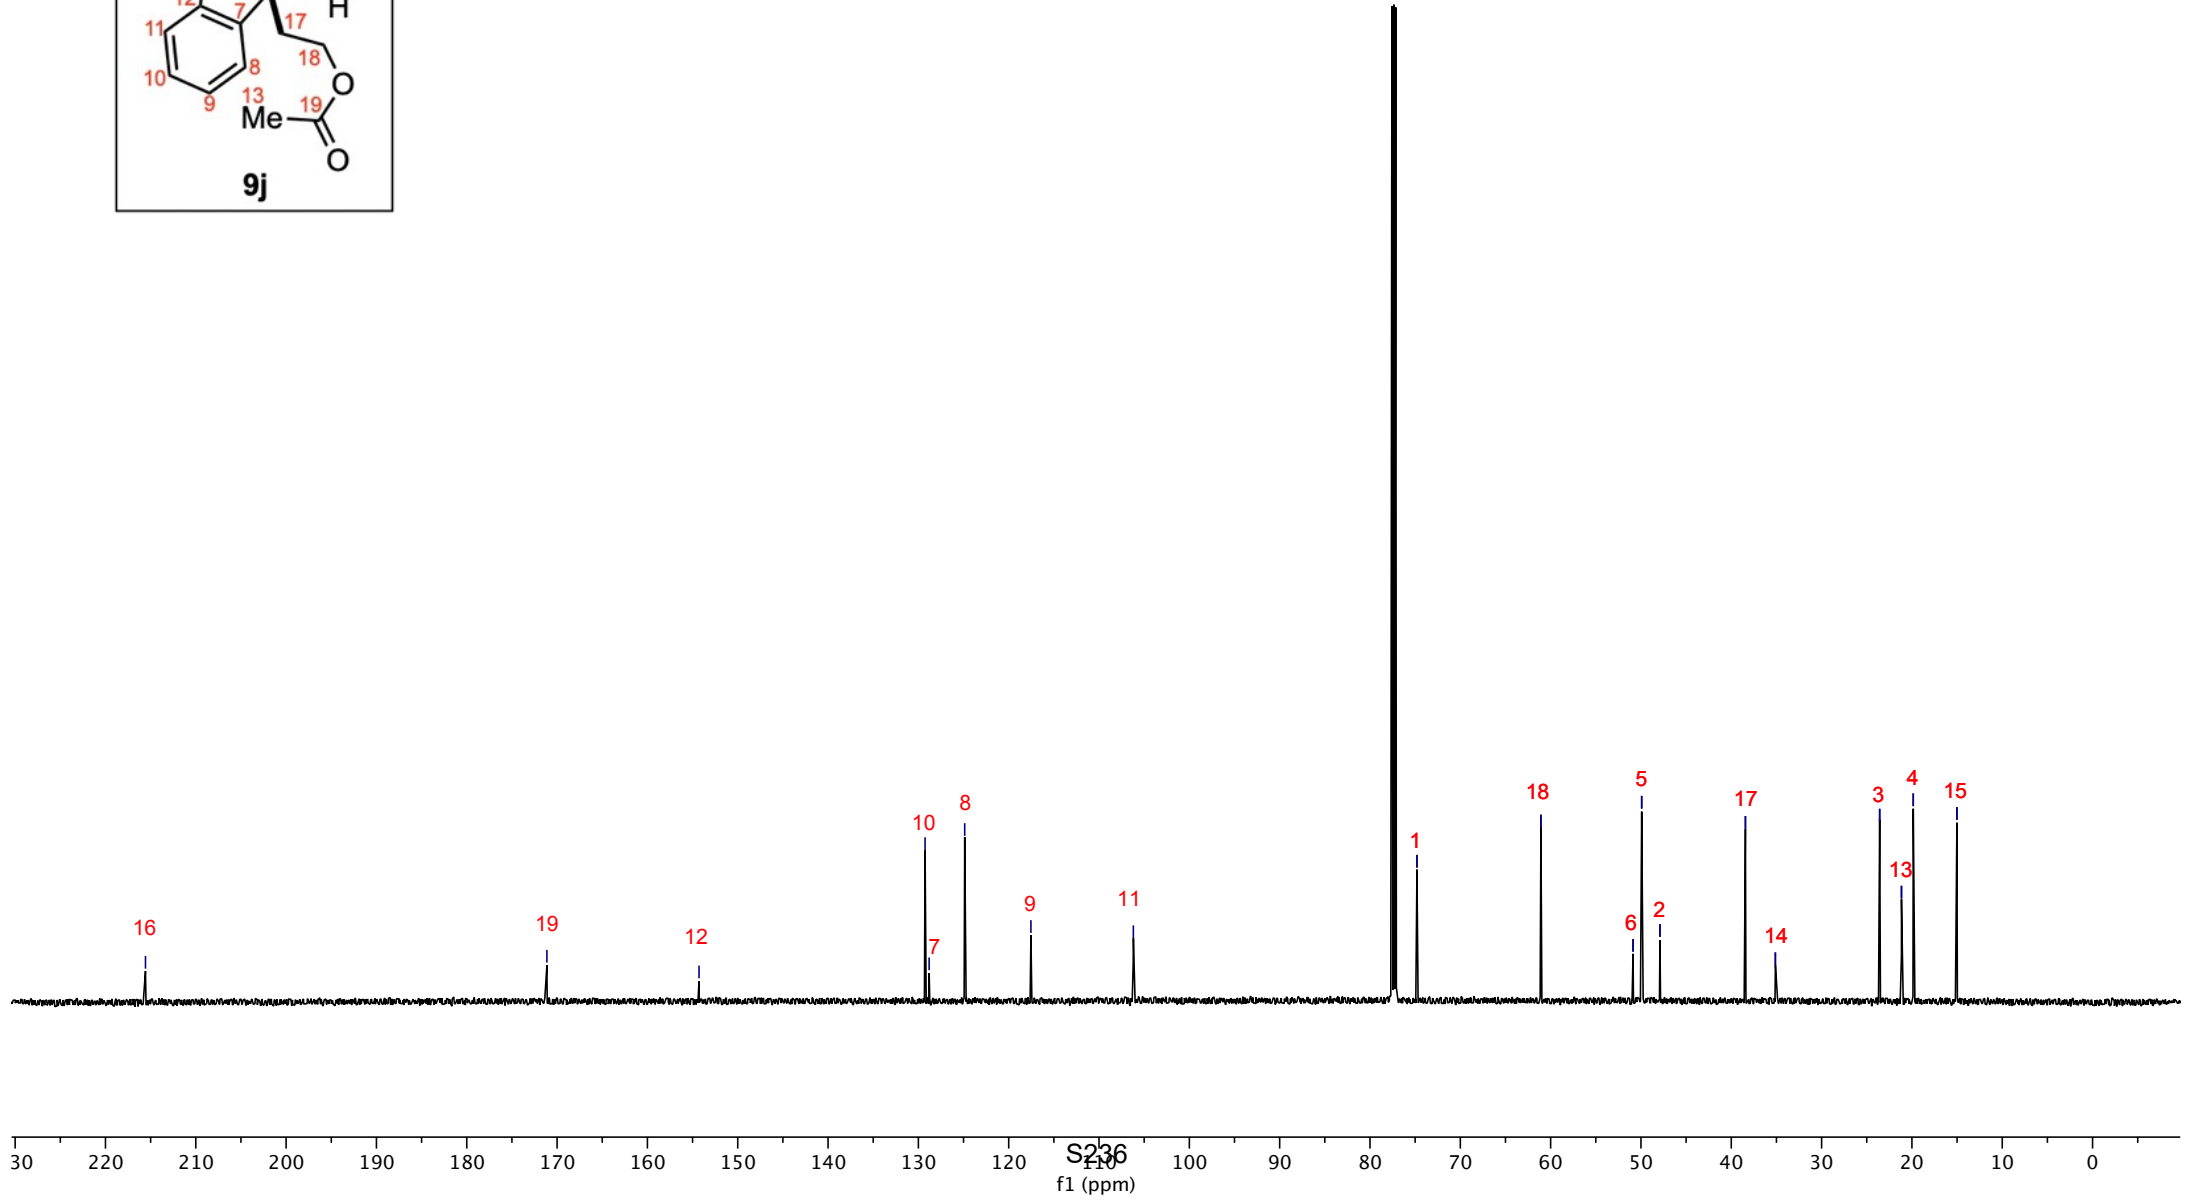

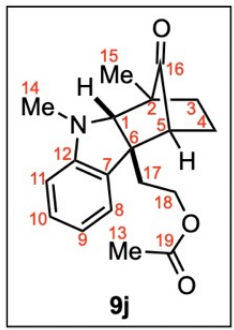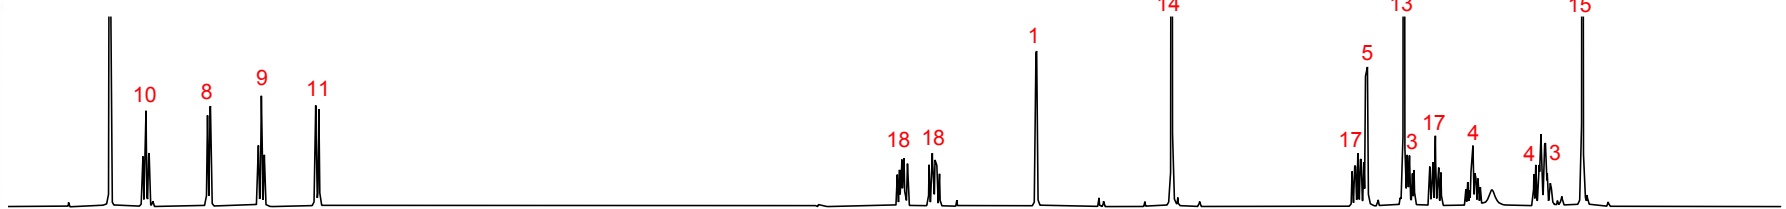

**COSY**

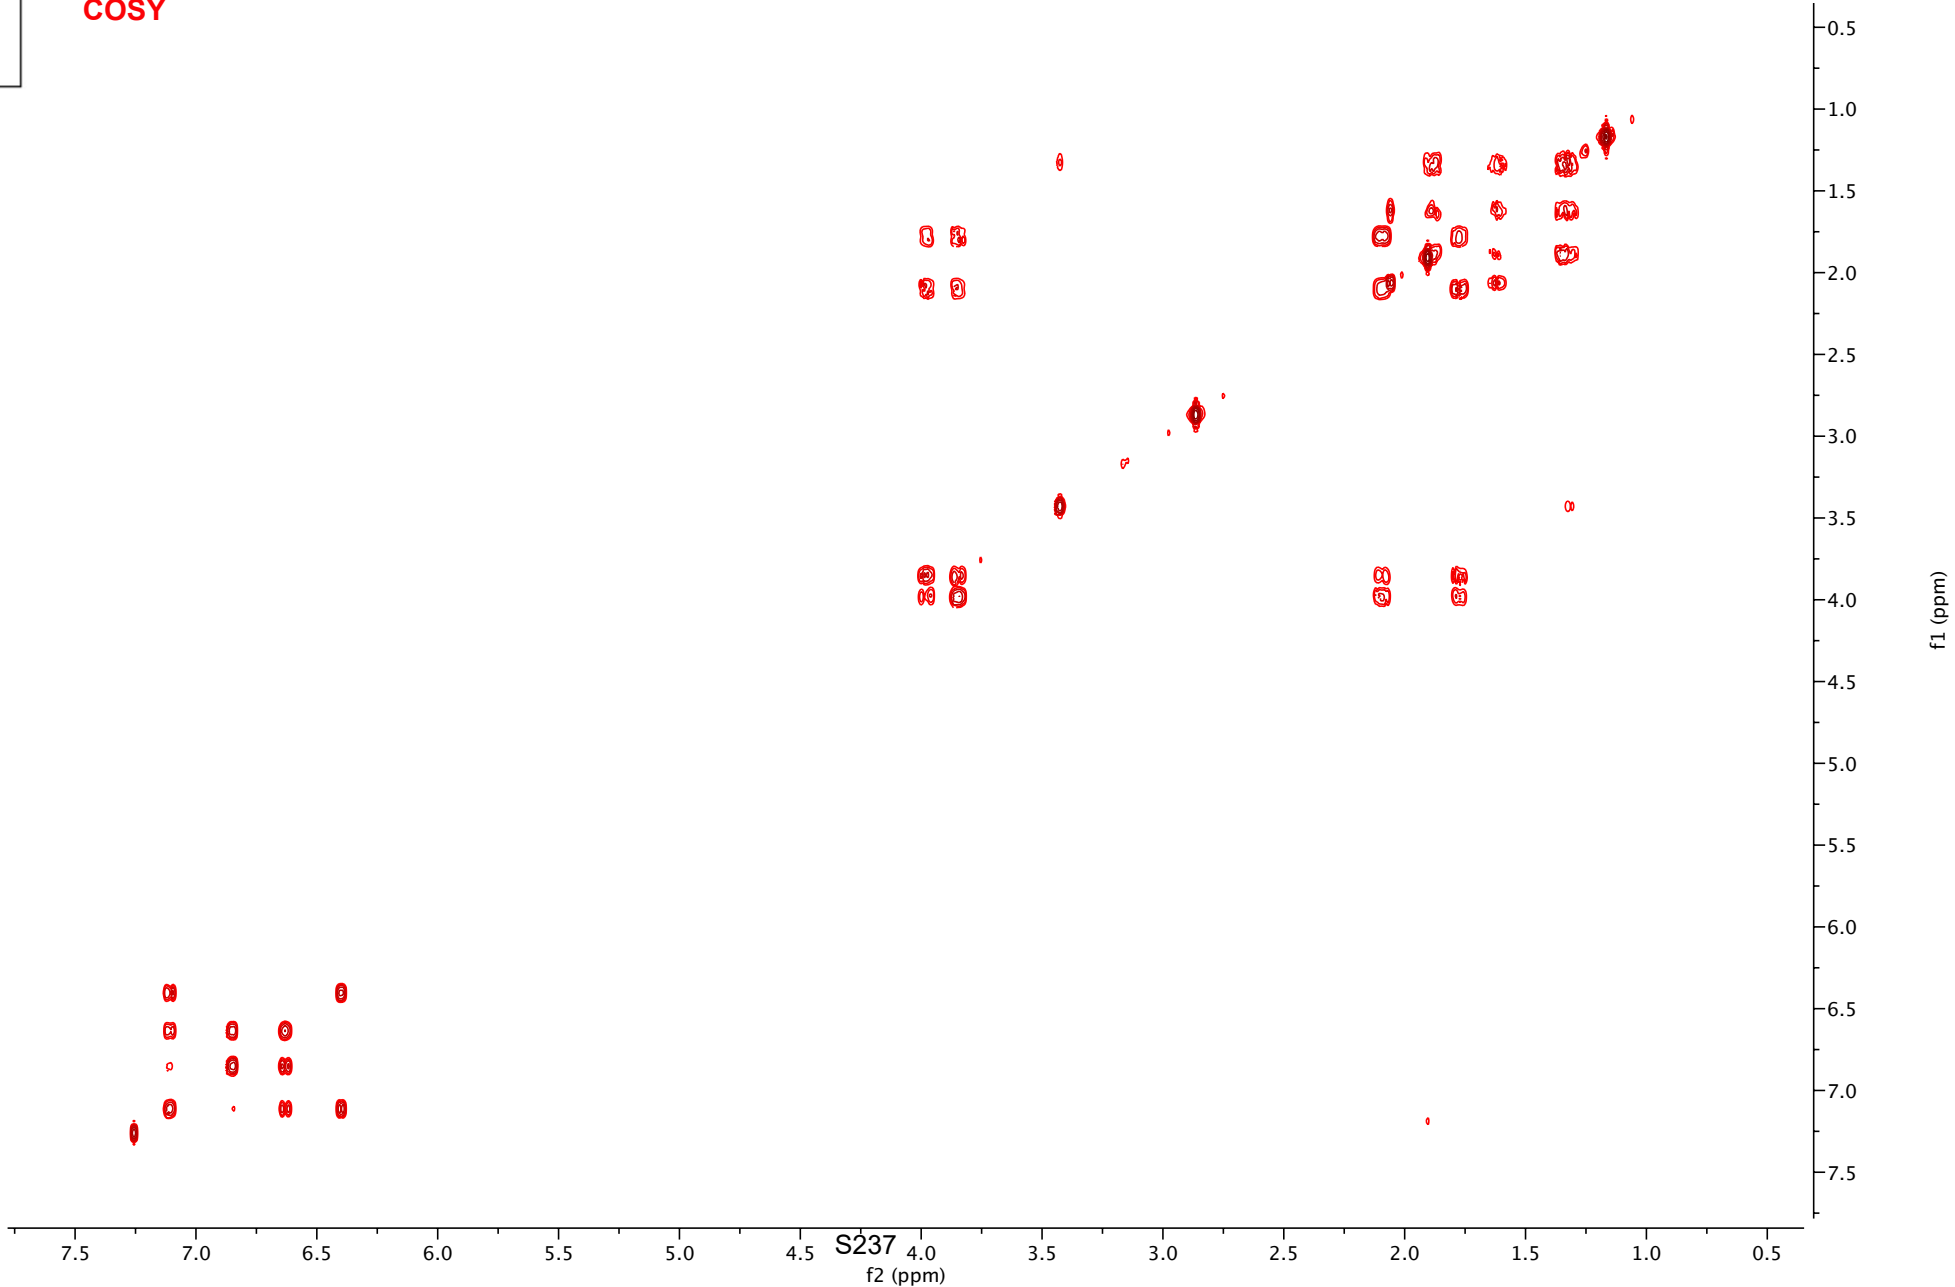

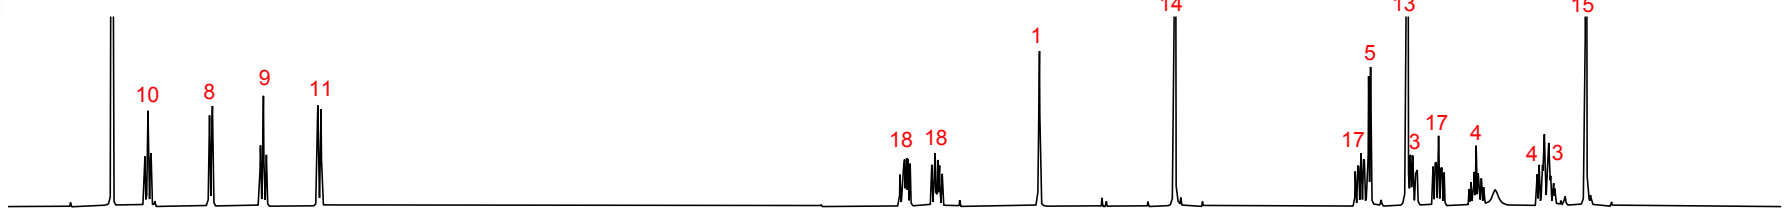

**HSQC**

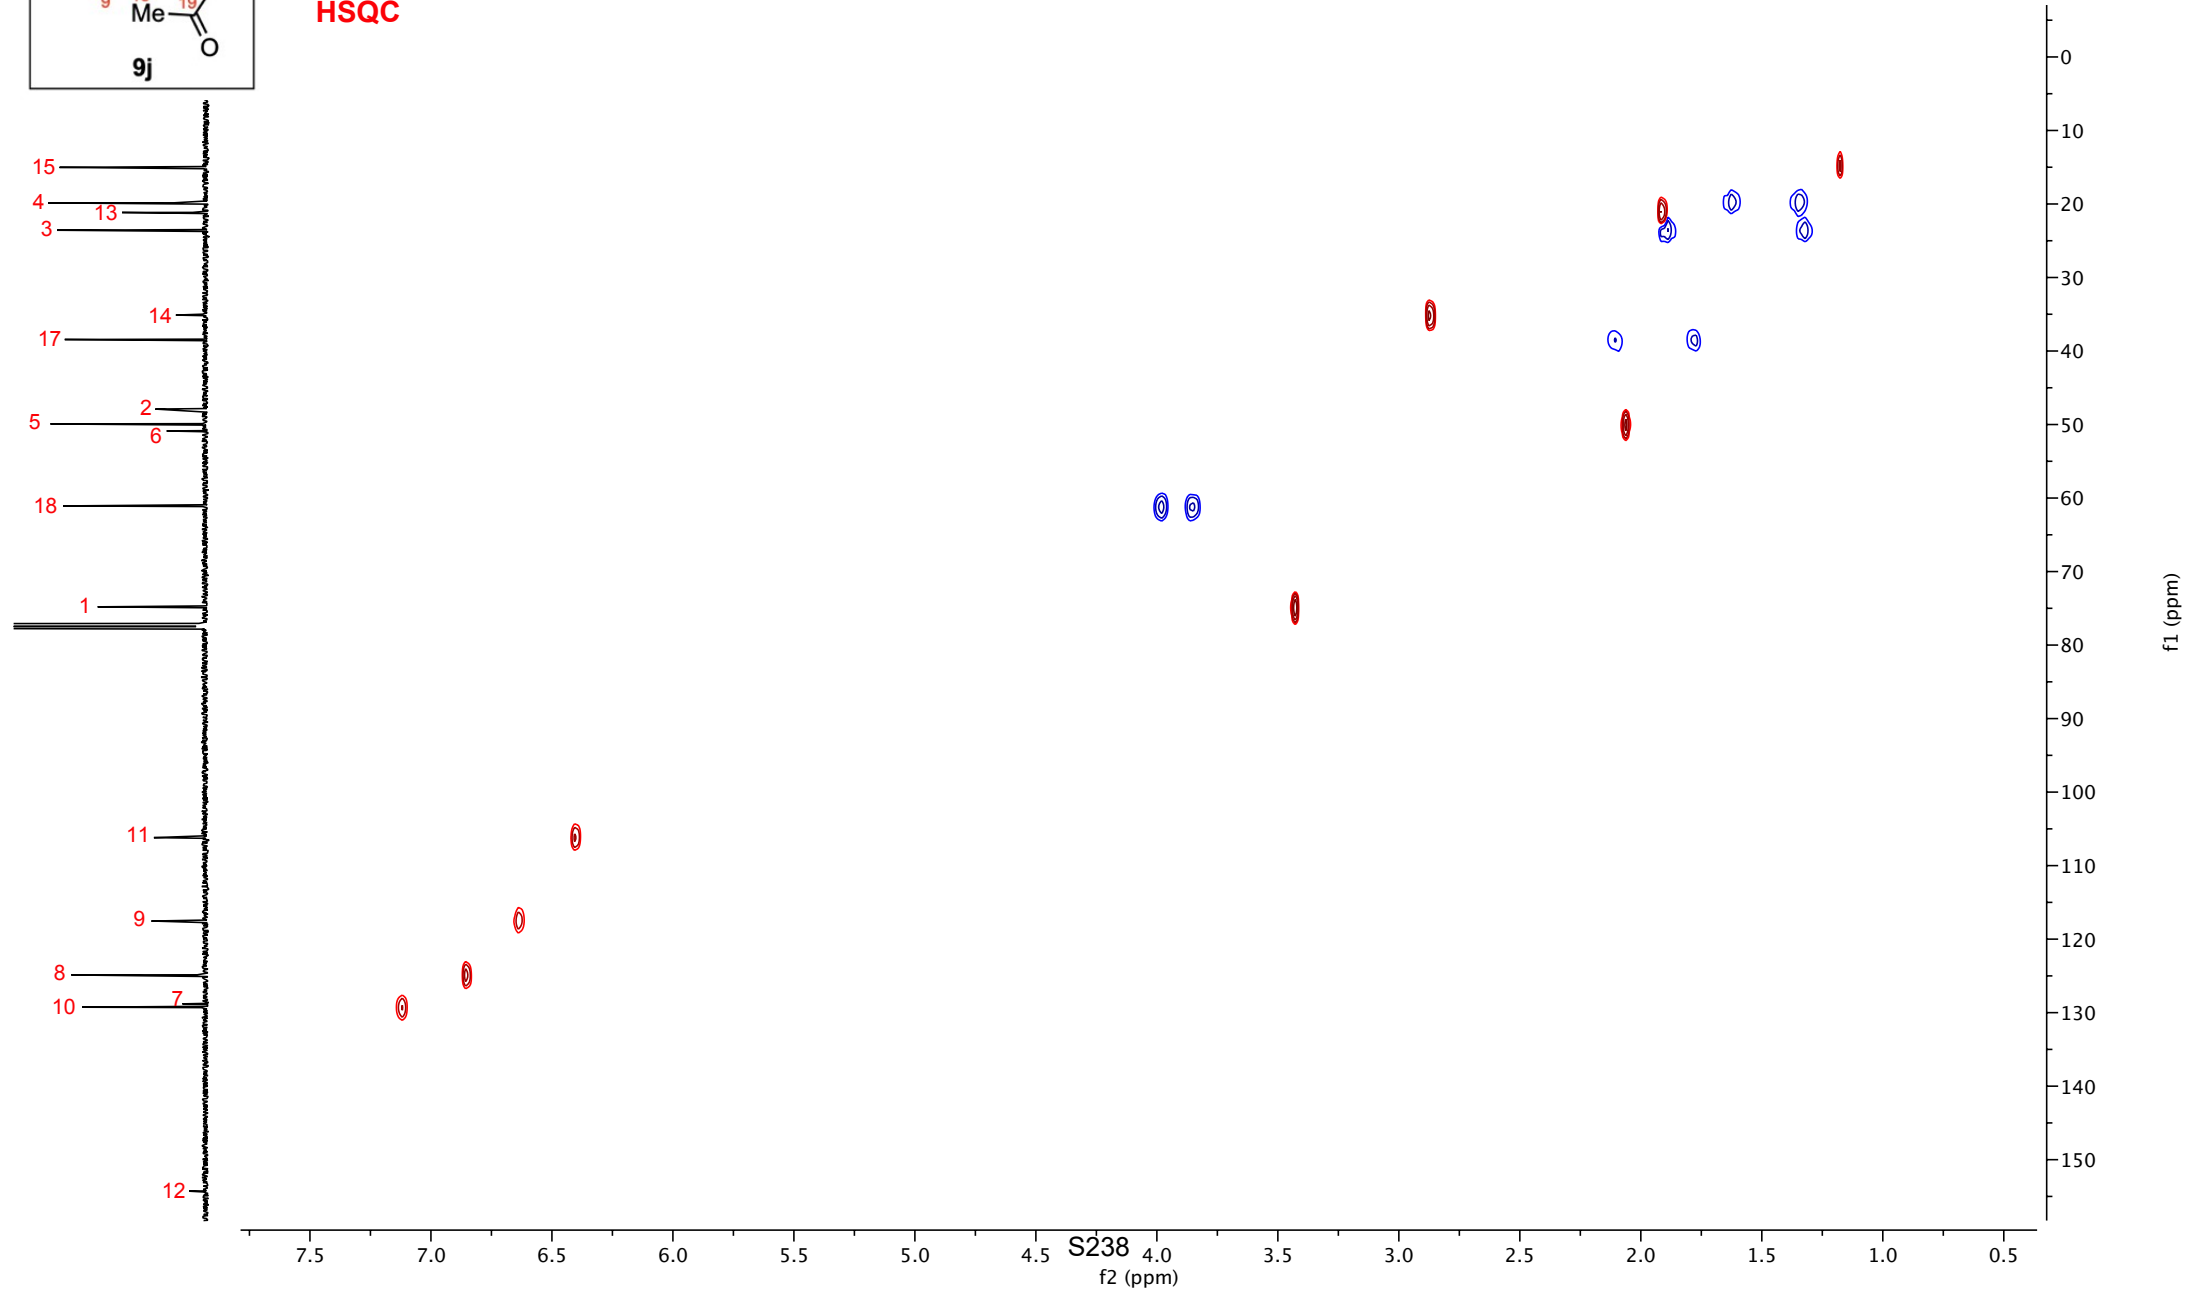

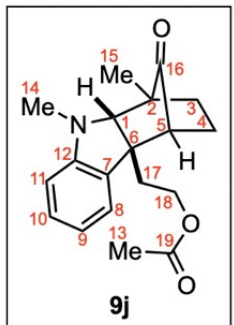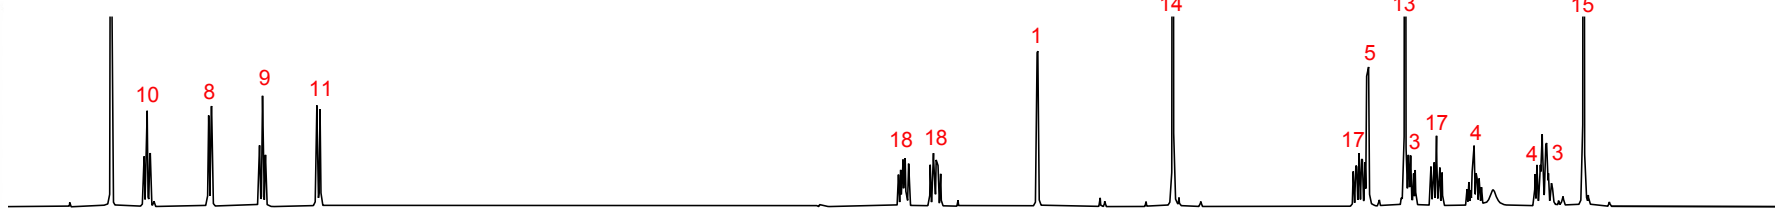

**HMBC**

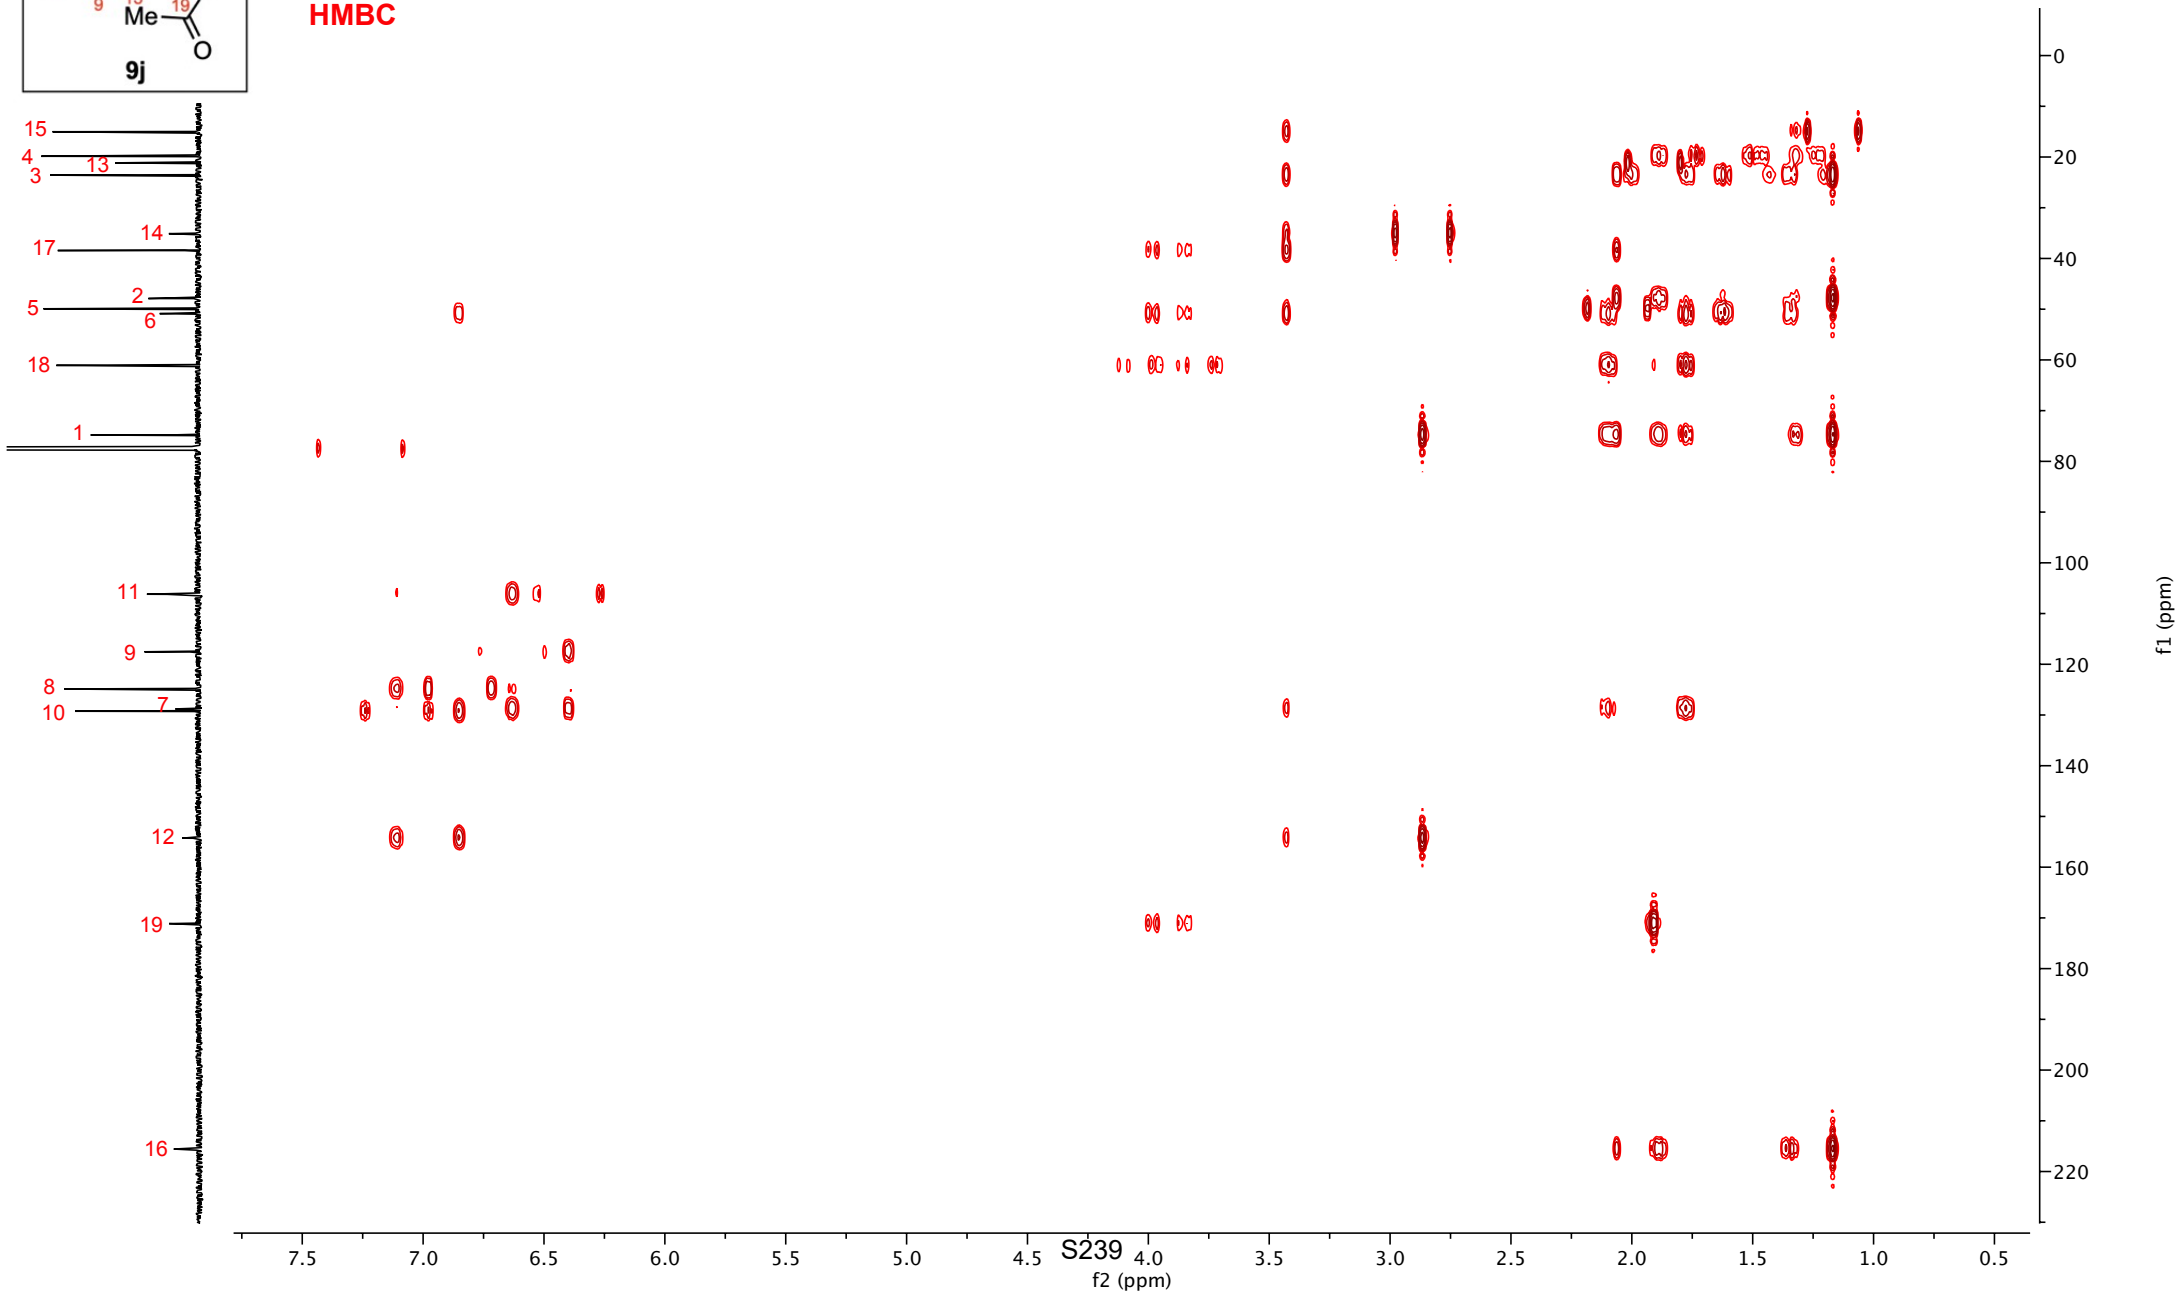



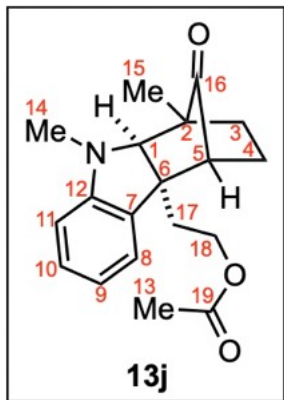

7.05  
7.04  
7.04  
7.03  
7.03  
6.88  
6.87  
6.86  
6.62  
6.61  
6.61  
6.60  
6.51  
6.30

4.05  
4.04  
4.04  
4.03  
4.02  
4.02  
4.01  
3.93  
3.92  
3.91  
3.90  
3.90  
3.89  
3.18

2.87  
2.19  
2.19  
2.16  
2.14  
2.14  
2.13  
2.13  
2.12  
2.12  
2.11  
2.10  
2.09  
2.08  
2.07  
2.06  
2.06  
2.03  
2.02  
2.01  
2.00  
2.00  
1.99  
1.99  
1.98  
1.83  
1.82  
1.81  
1.81  
1.80  
1.80  
1.80  
1.80  
1.79  
1.79  
1.78  
1.67  
1.66  
1.66  
1.66  
1.65  
1.65  
1.64

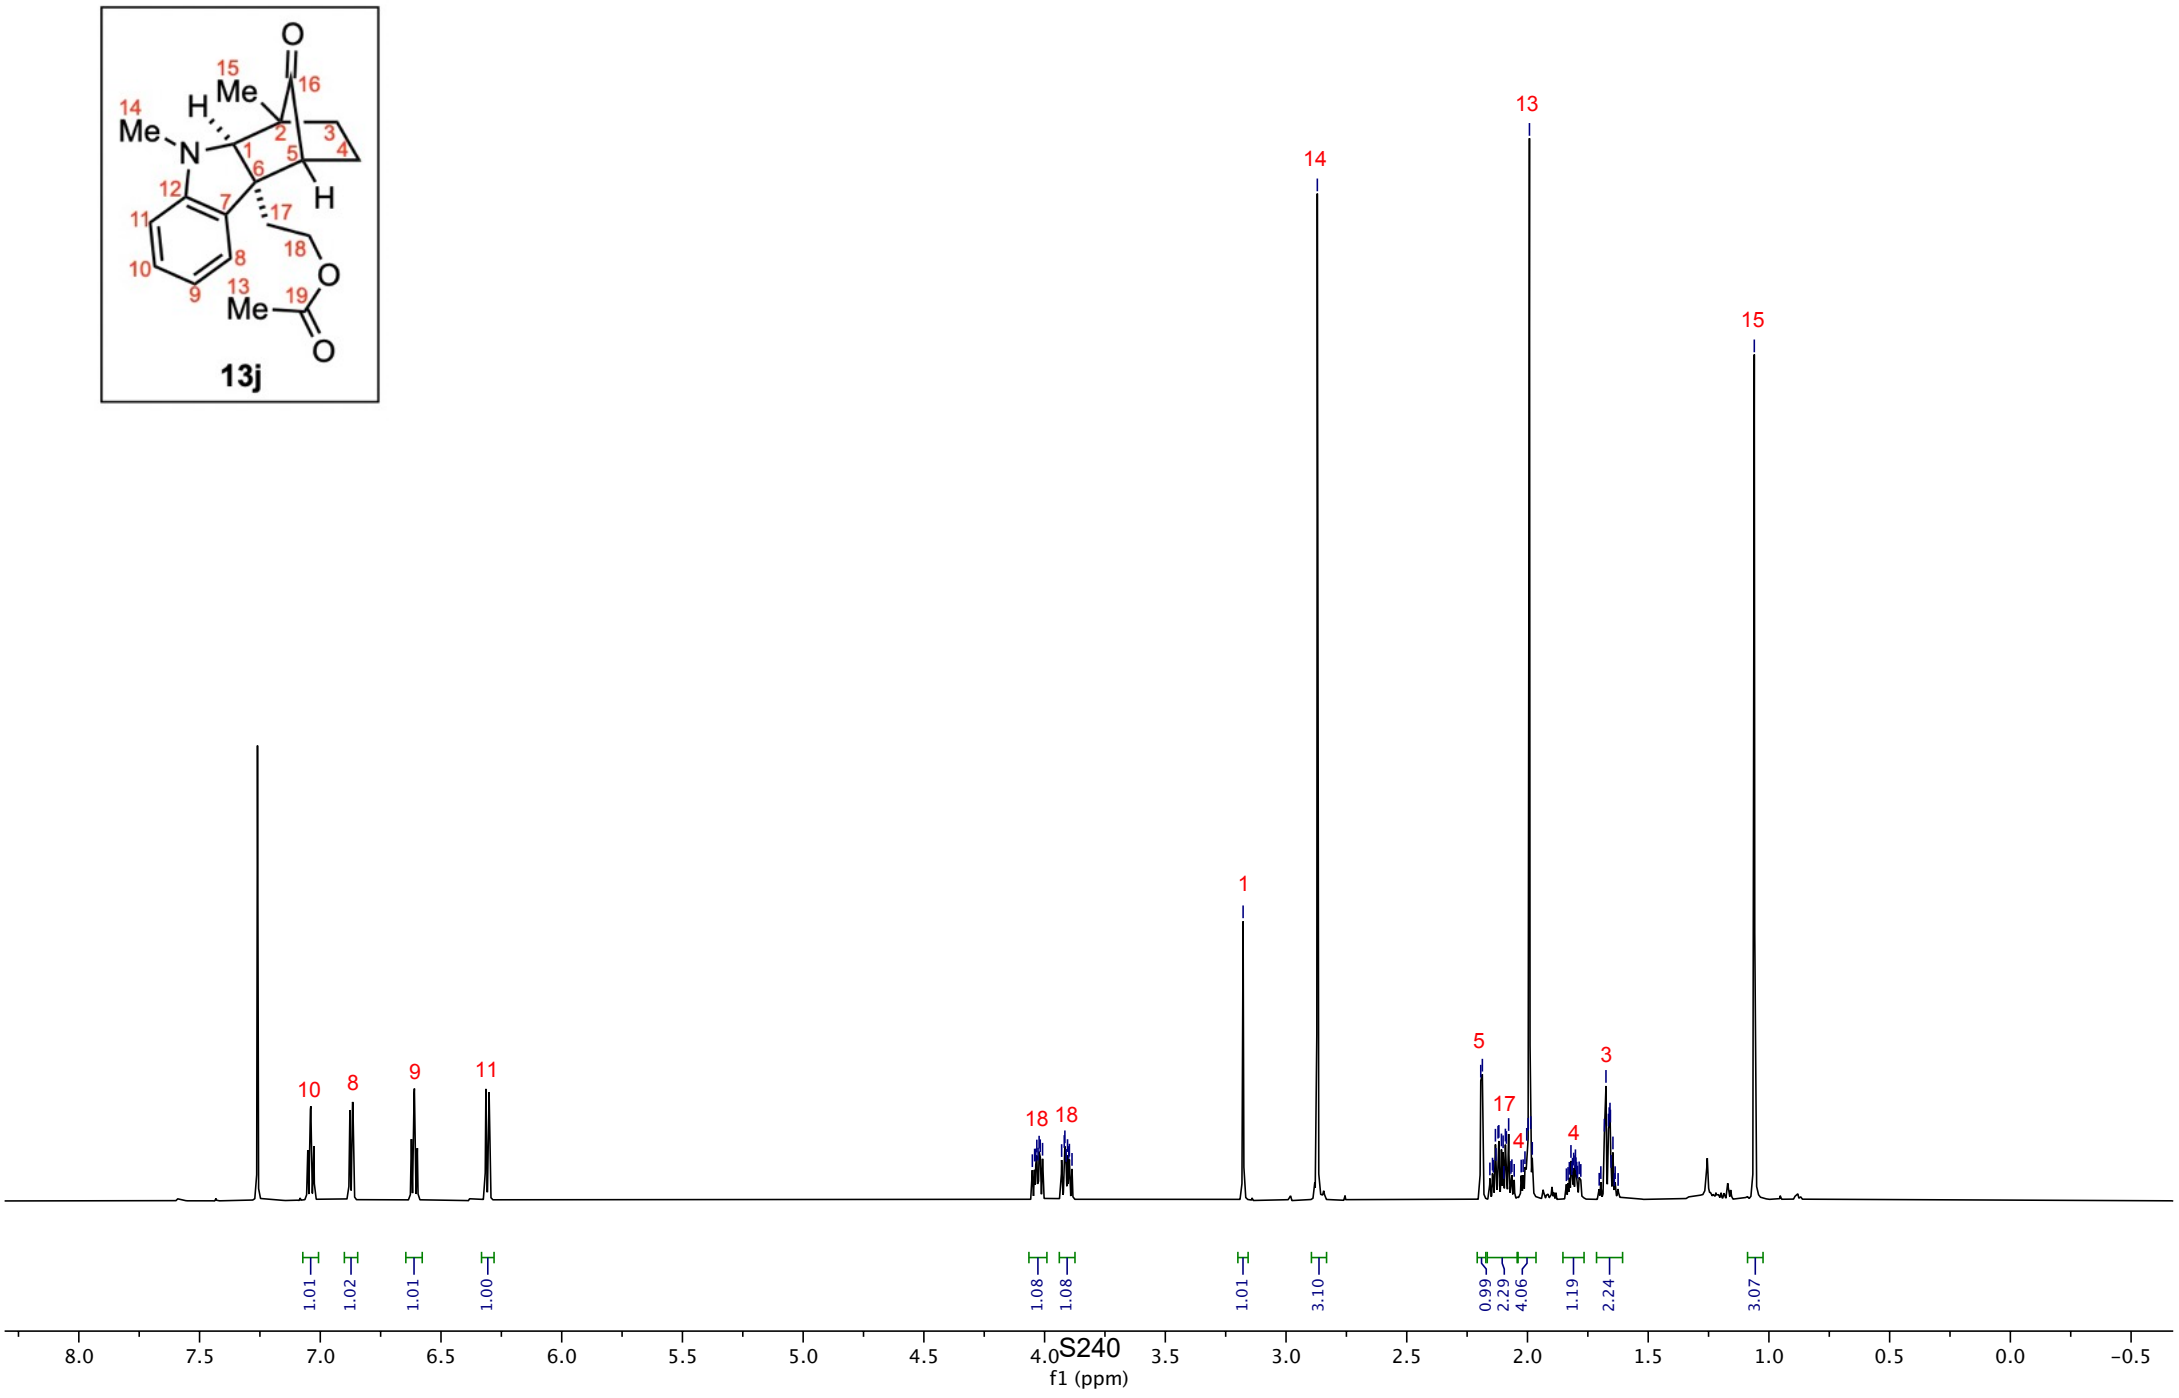

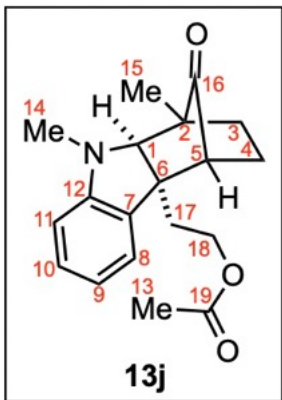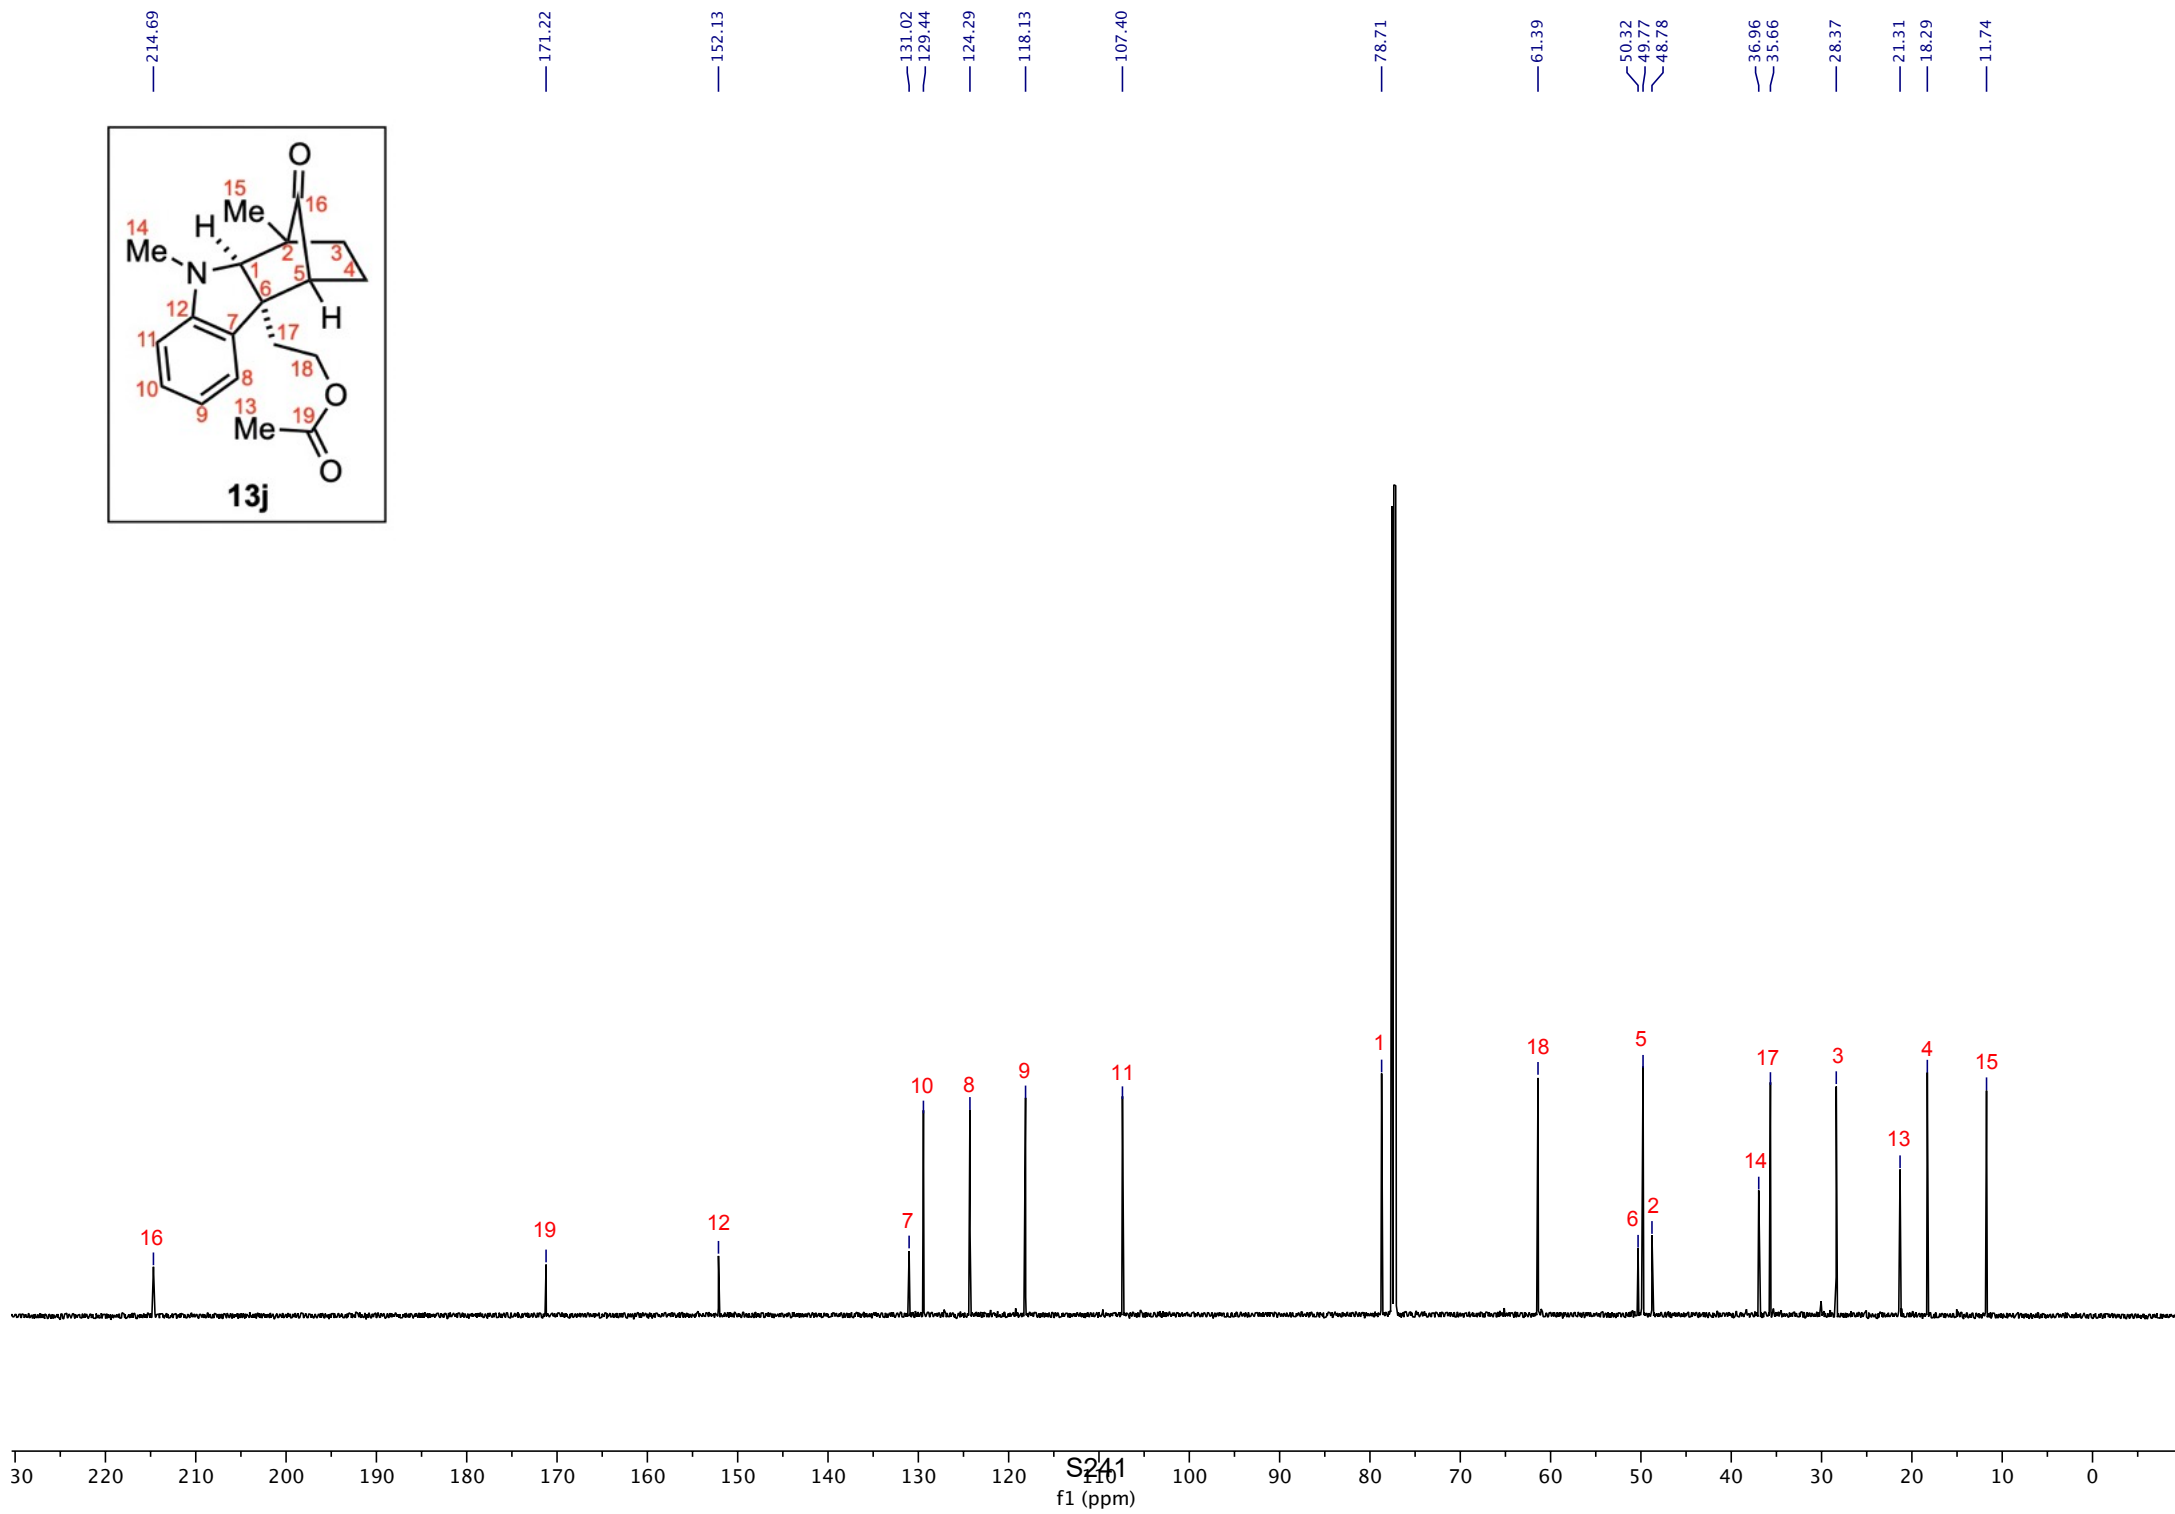

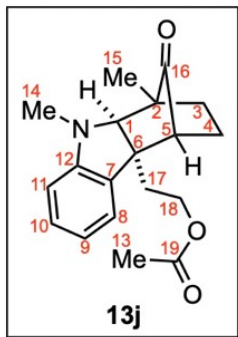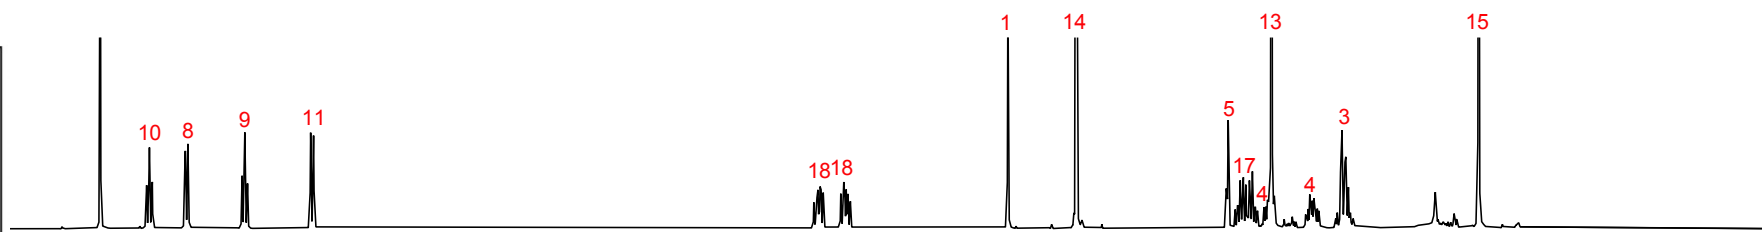

**COSY**

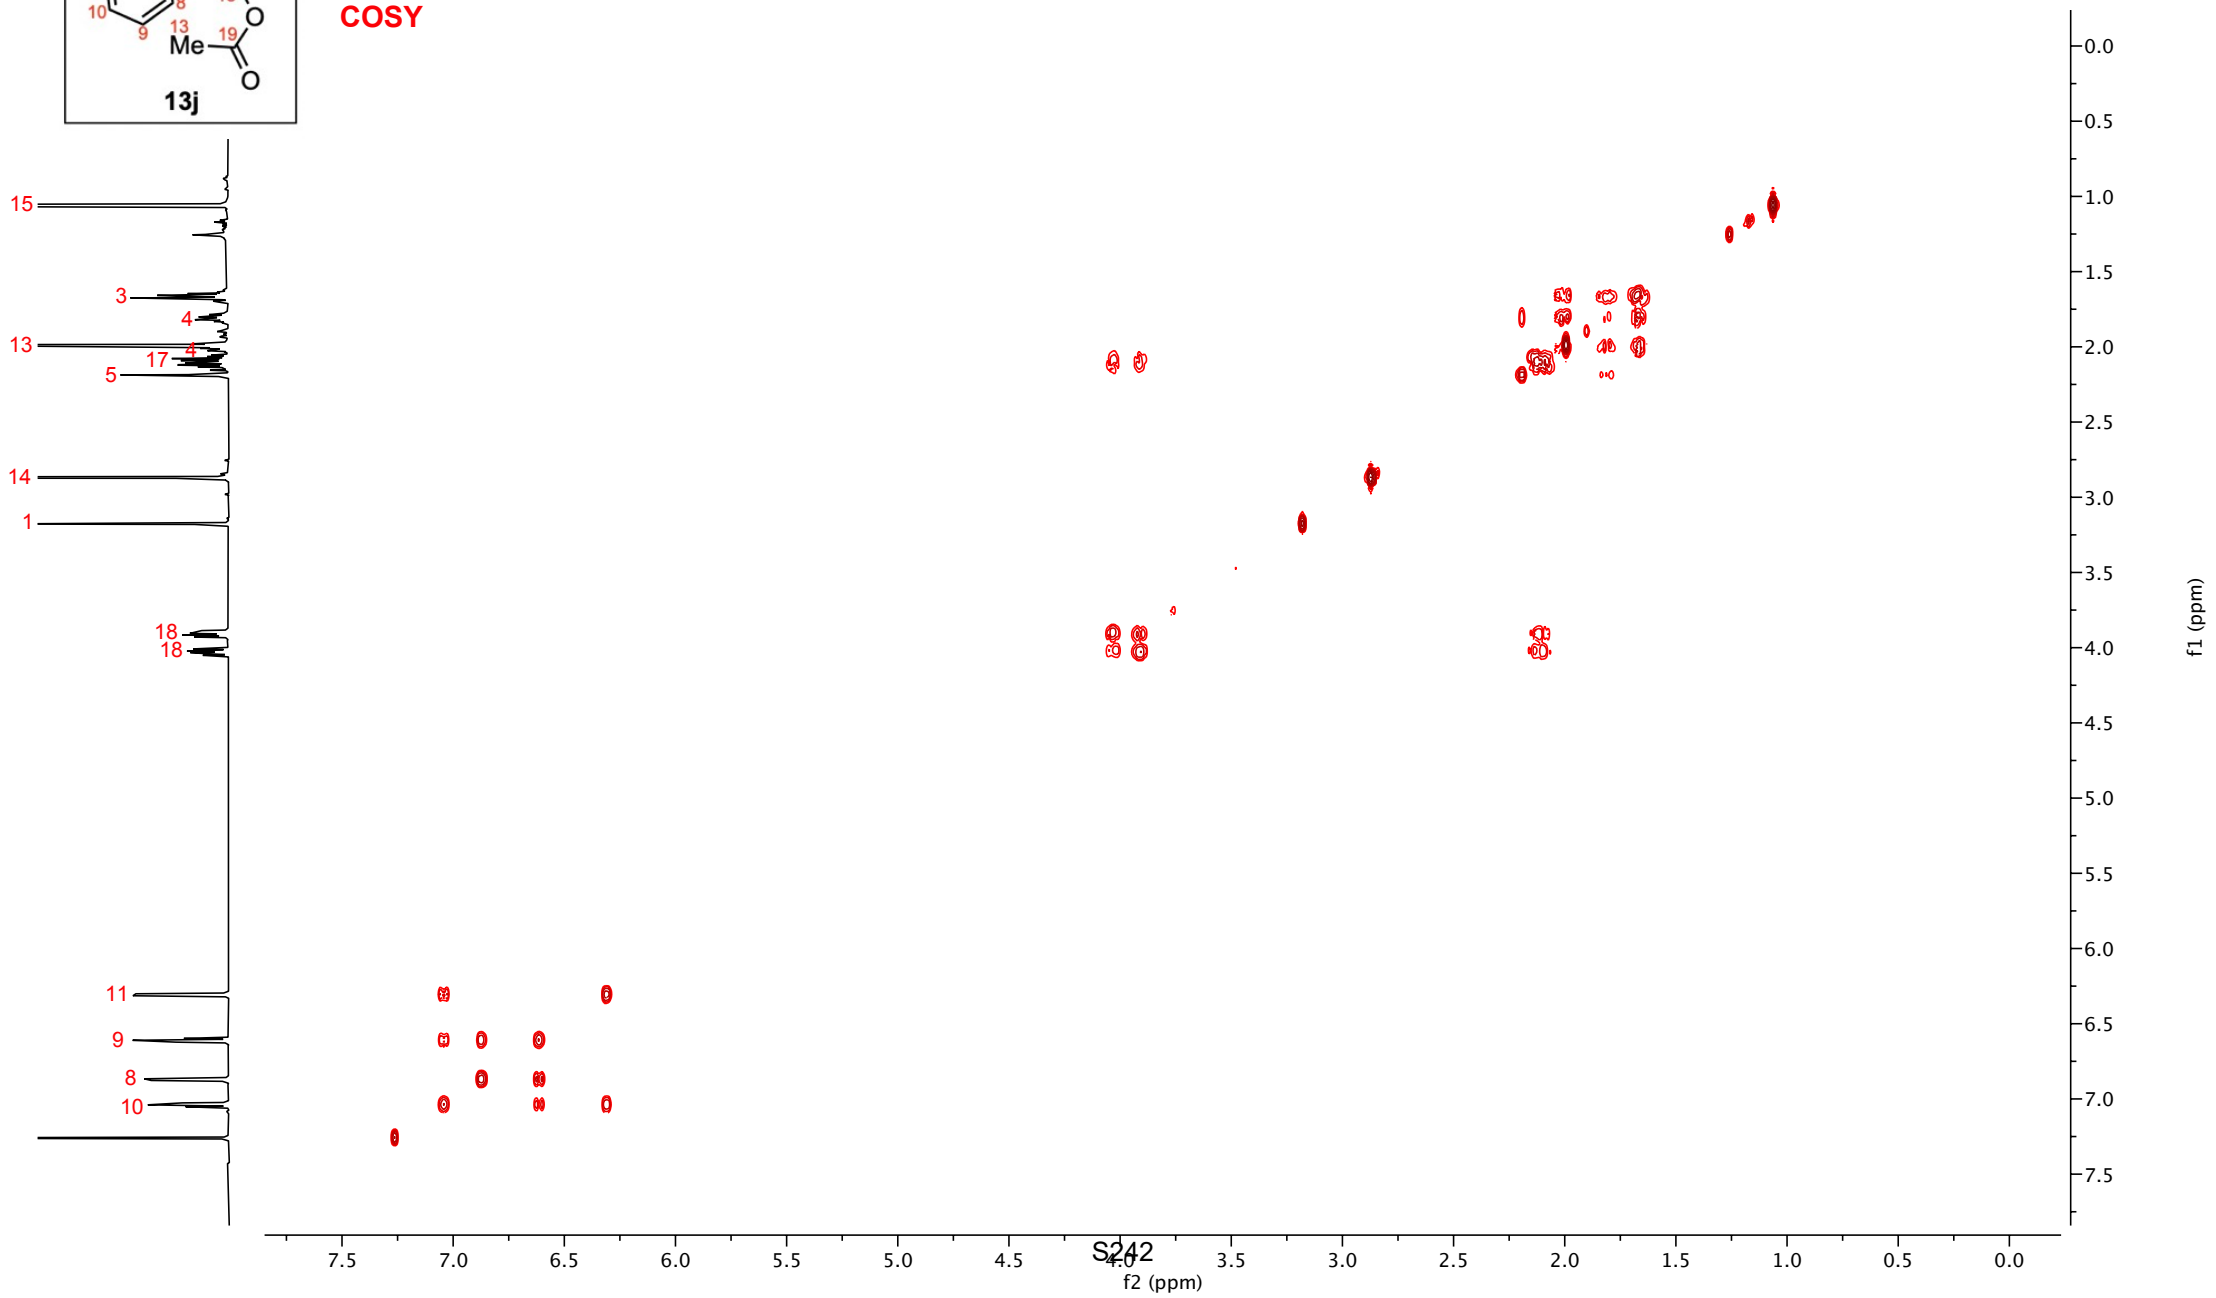

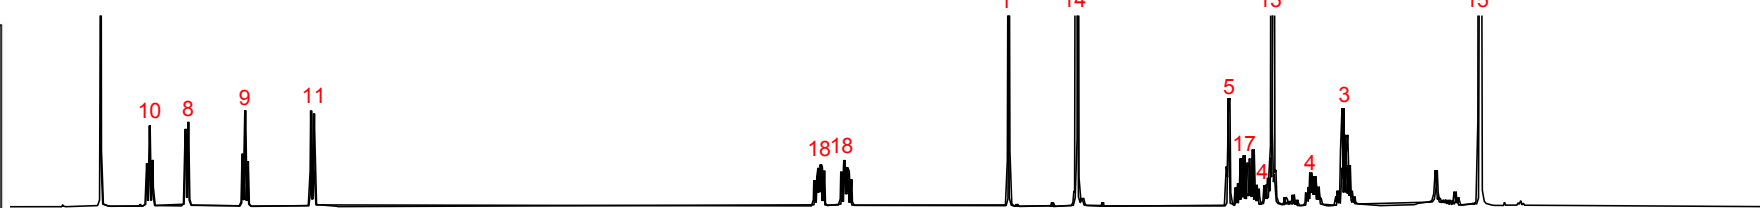

HSQC

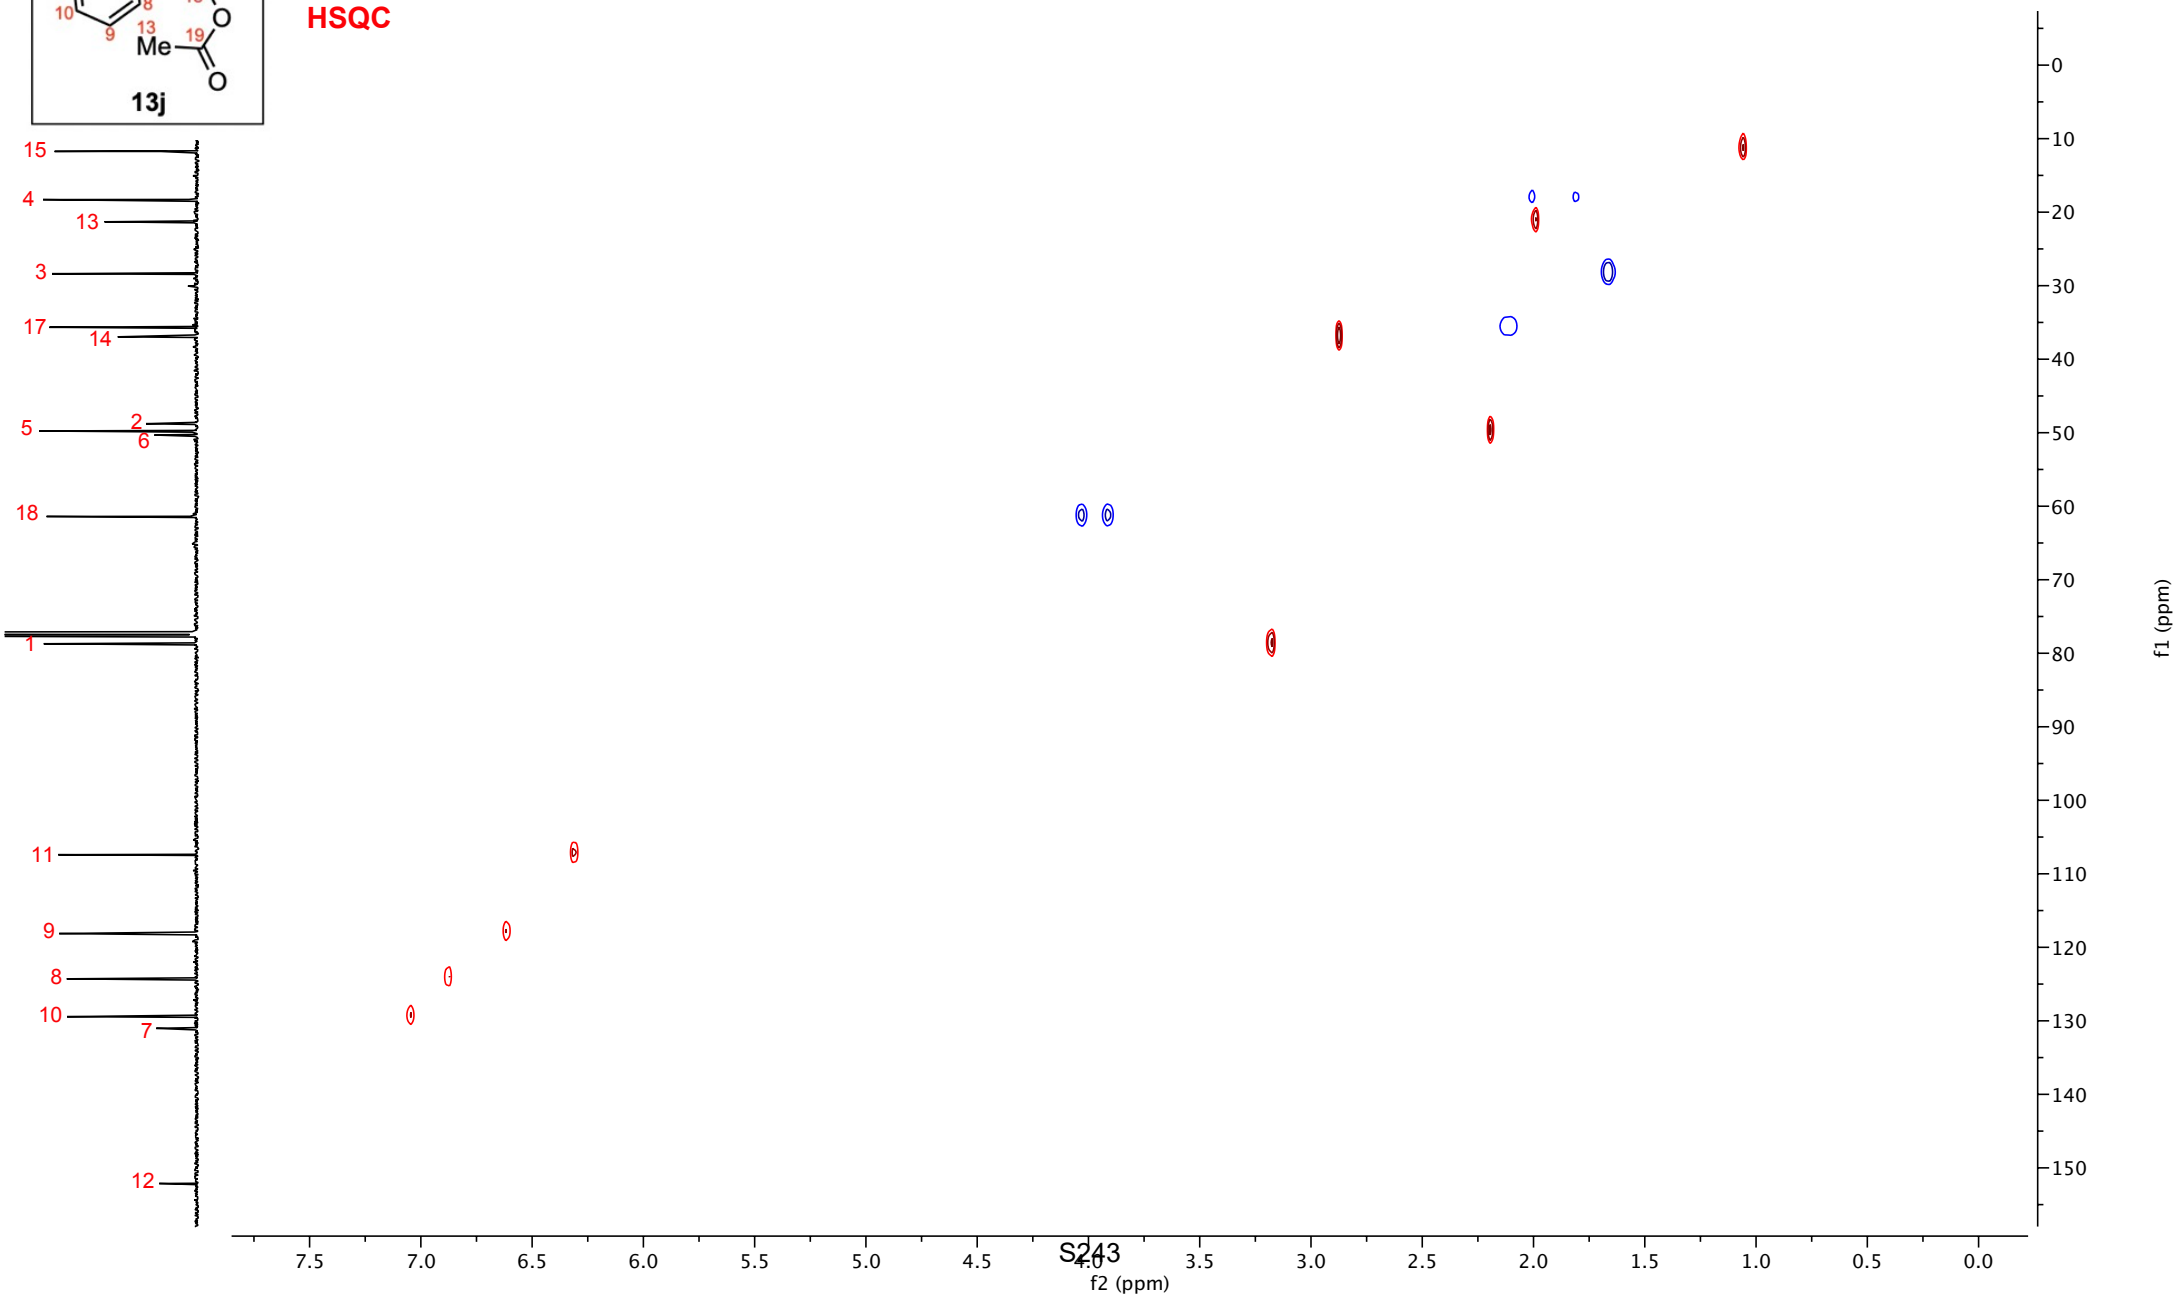

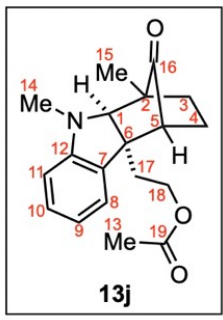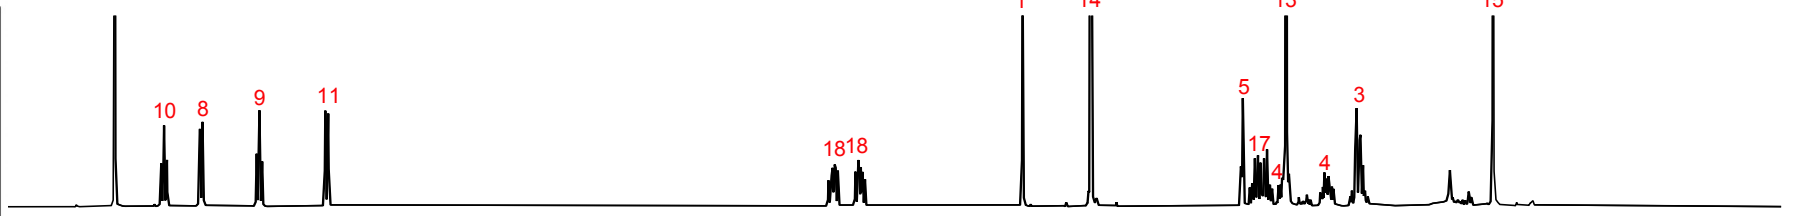

**HMBC**

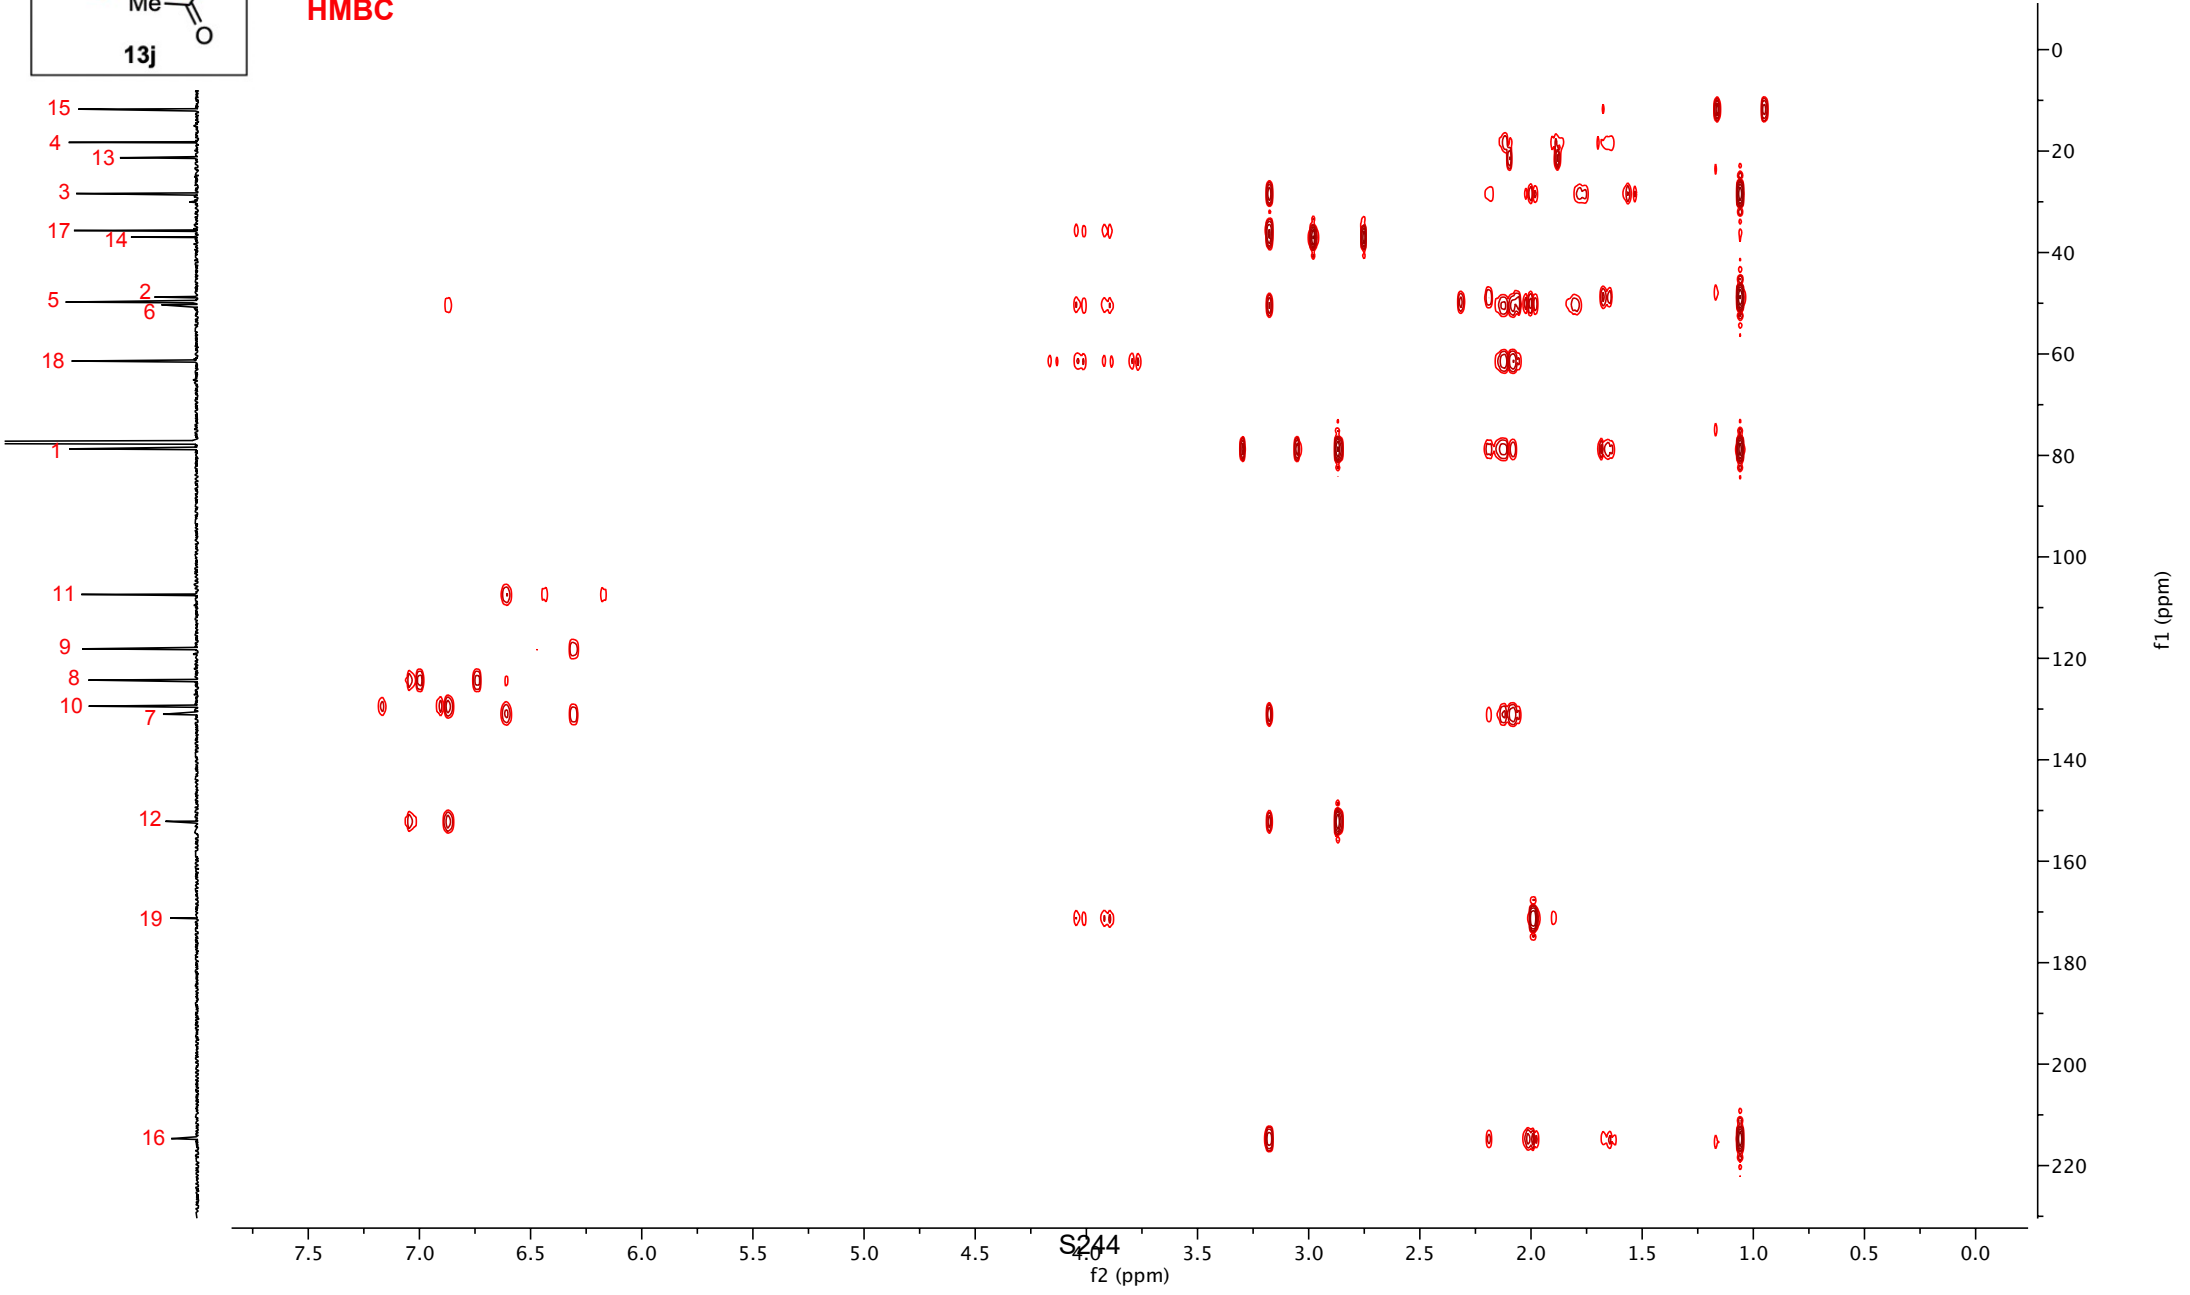

7.33  
7.32  
7.32  
7.31  
7.31  
7.30  
7.29  
7.29  
7.29  
7.28  
7.28  
7.27  
7.27  
7.27  
7.22  
7.22  
7.21  
7.21  
7.21  
7.20  
7.20  
7.19  
7.19  
7.12  
7.10  
7.10  
7.09  
7.08  
6.84  
6.84  
6.82  
6.82  
6.66  
6.66  
6.65  
6.64  
6.63  
6.63  
6.42  
6.41

3.85  
3.85  
3.84  
3.84  
3.84  
3.82  
3.82  
3.50  
3.49

3.02  
2.99  
2.96

2.68

1.83  
1.57  
1.56  
1.55  
1.44  
1.44  
1.43  
1.43  
1.41  
1.41  
1.40  
1.39  
1.39  
1.38  
1.38  
1.35  
1.34  
1.33  
1.33  
1.32  
1.32  
1.30  
1.29  
1.26  
1.26

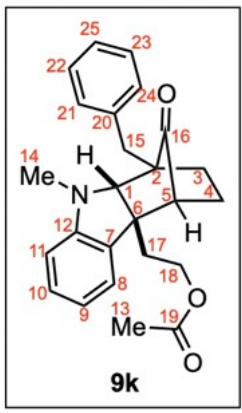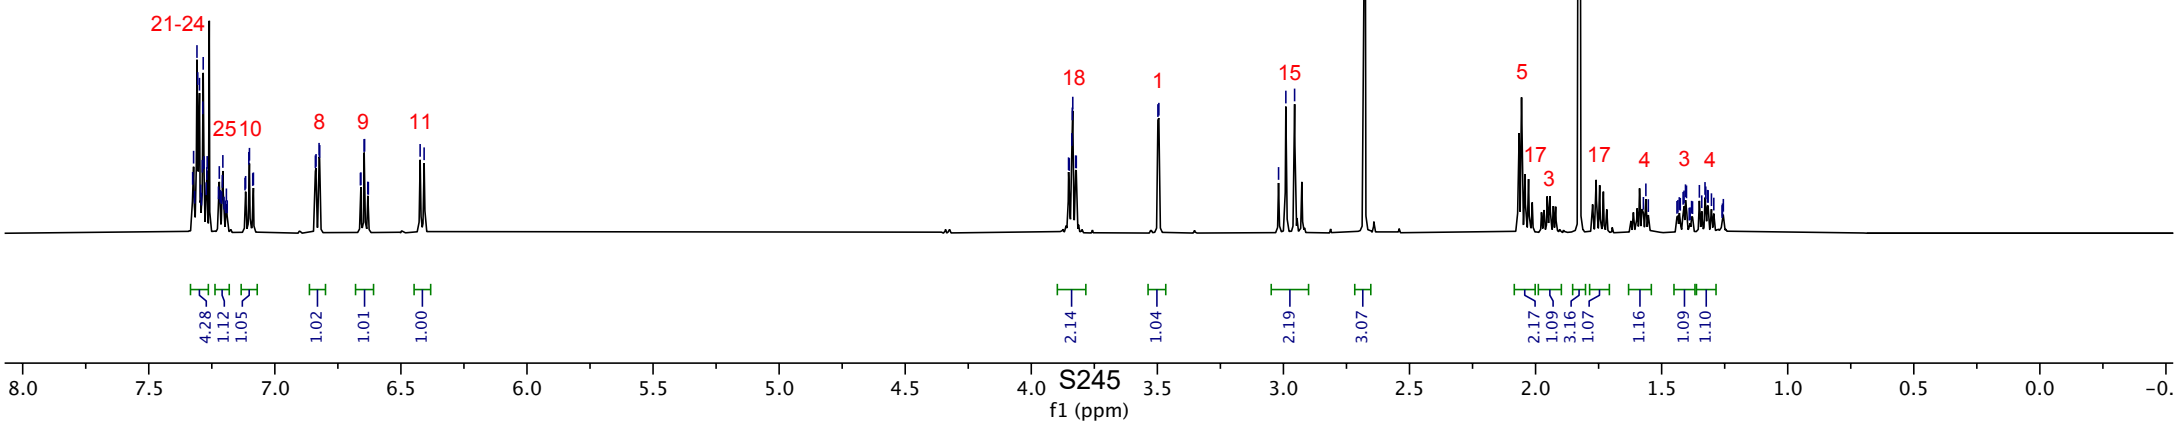

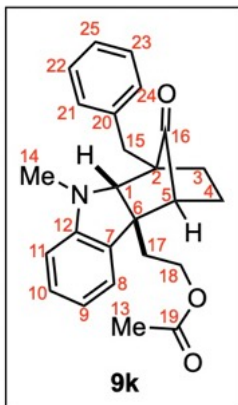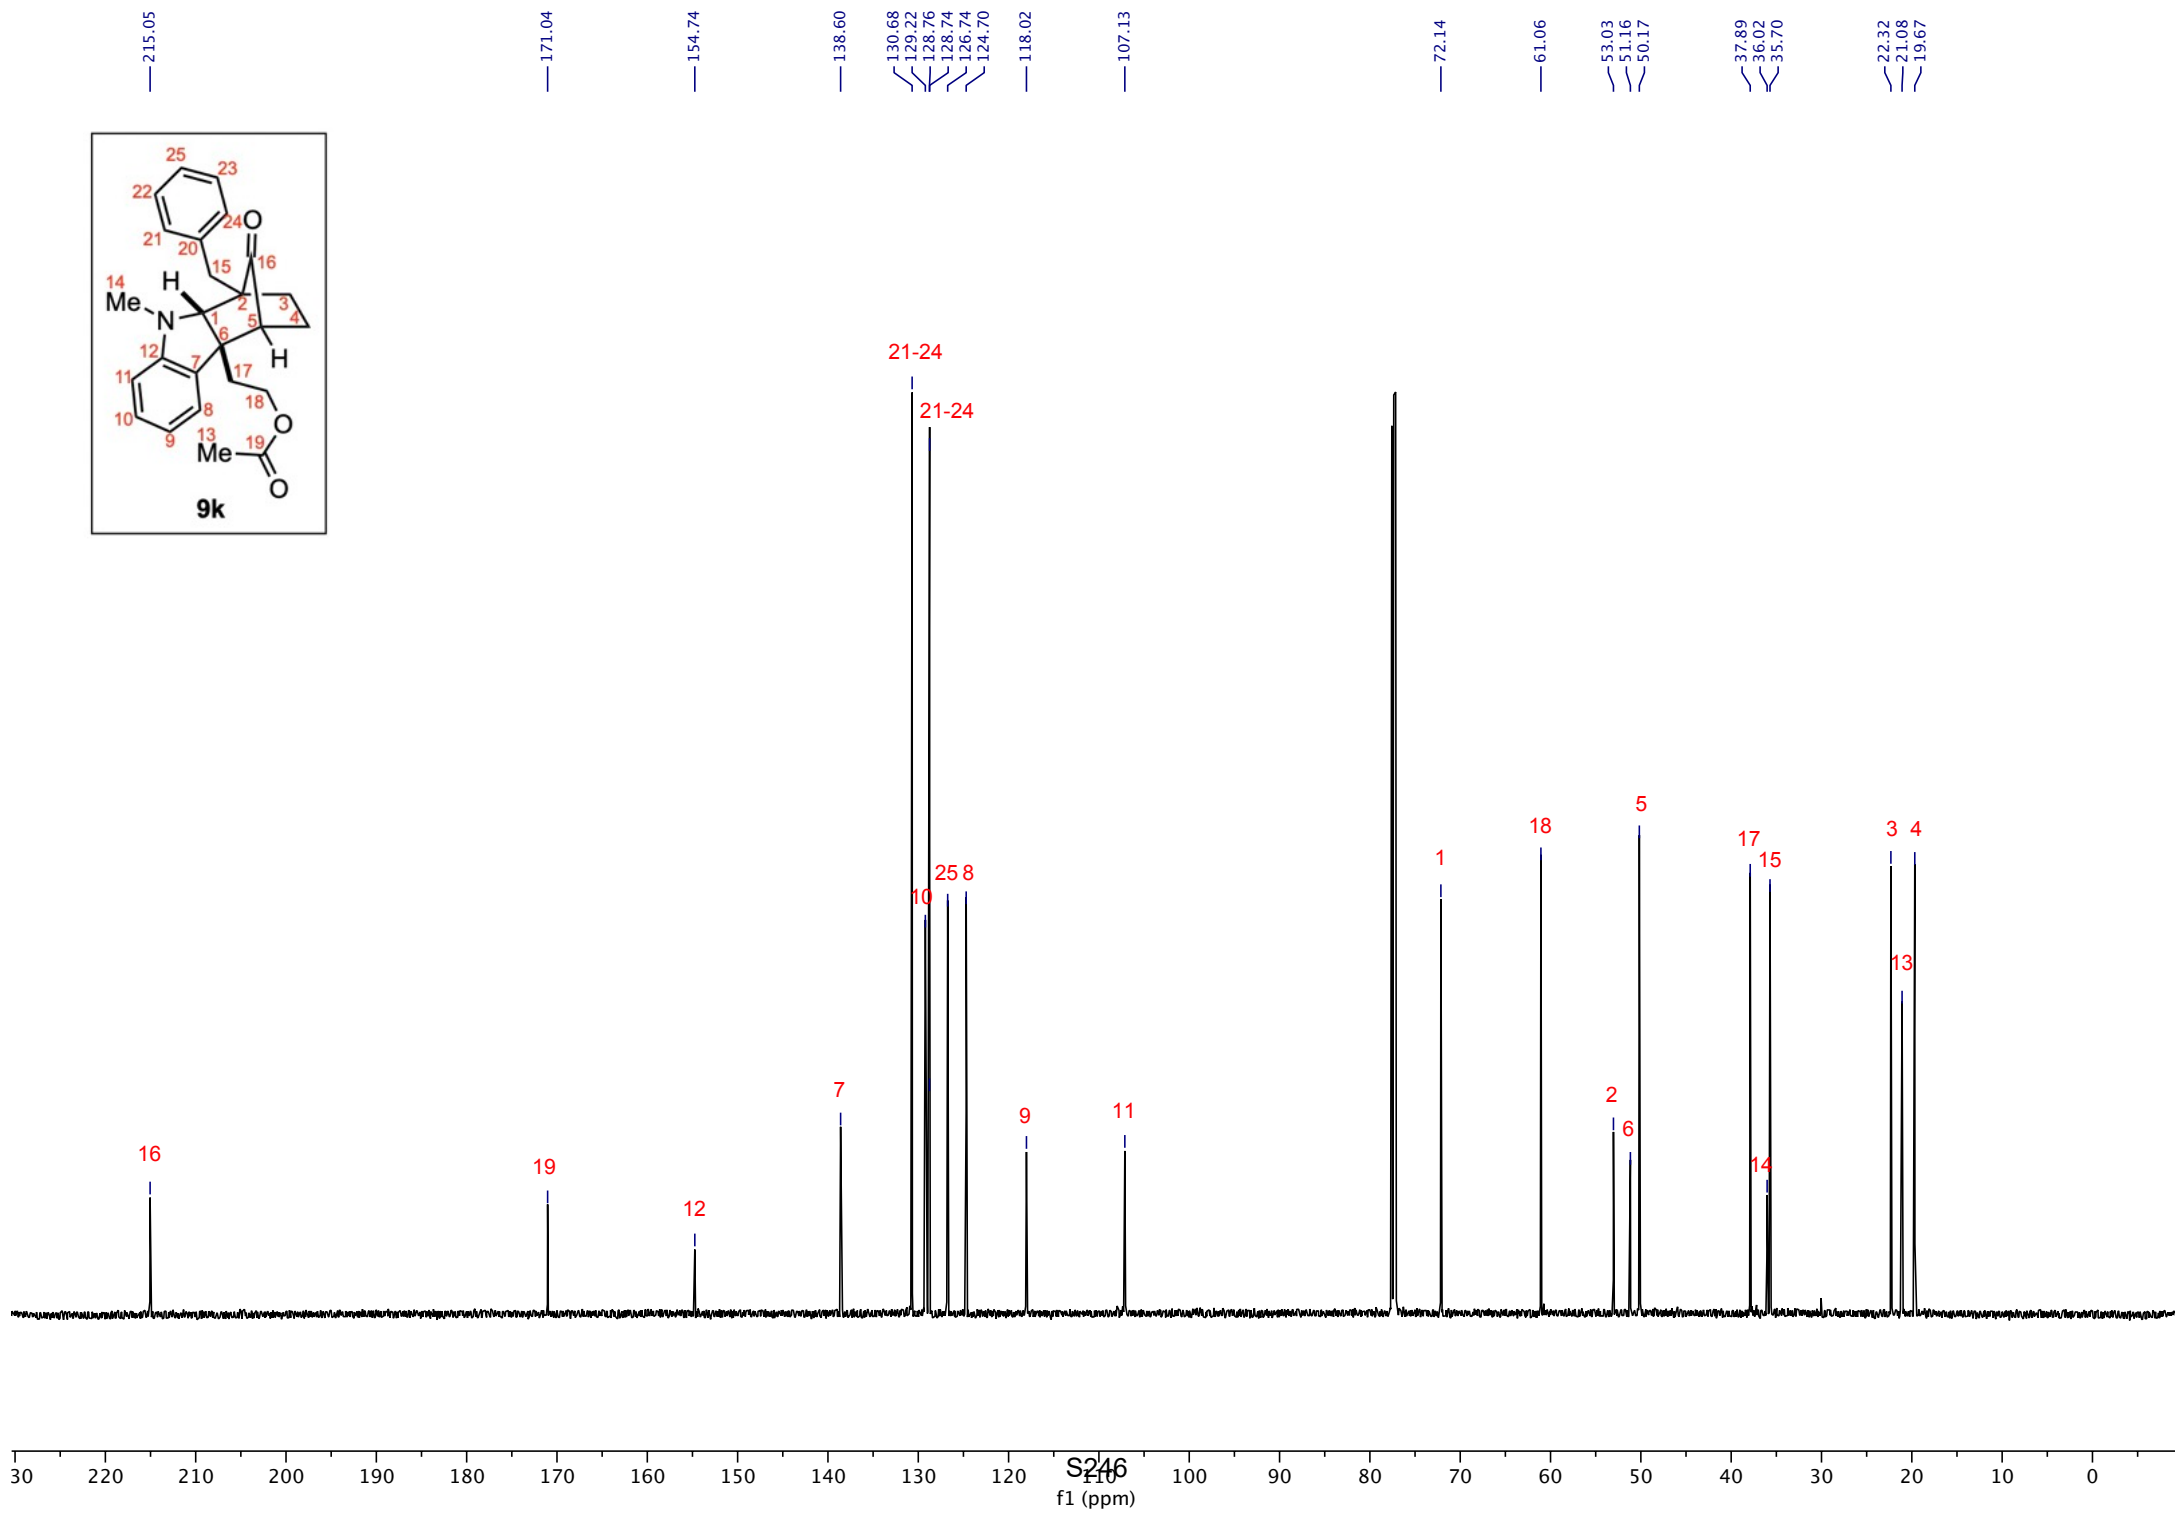

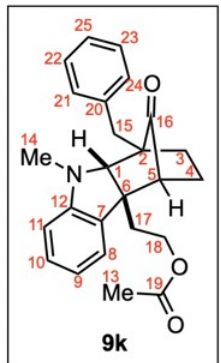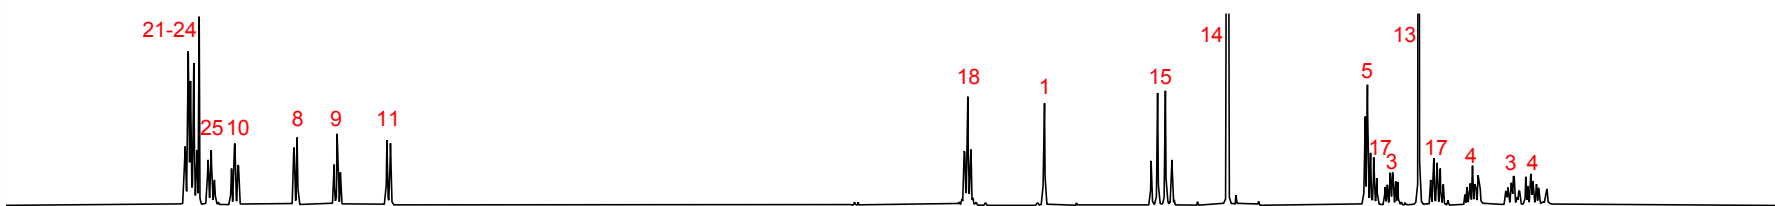

**COSY**

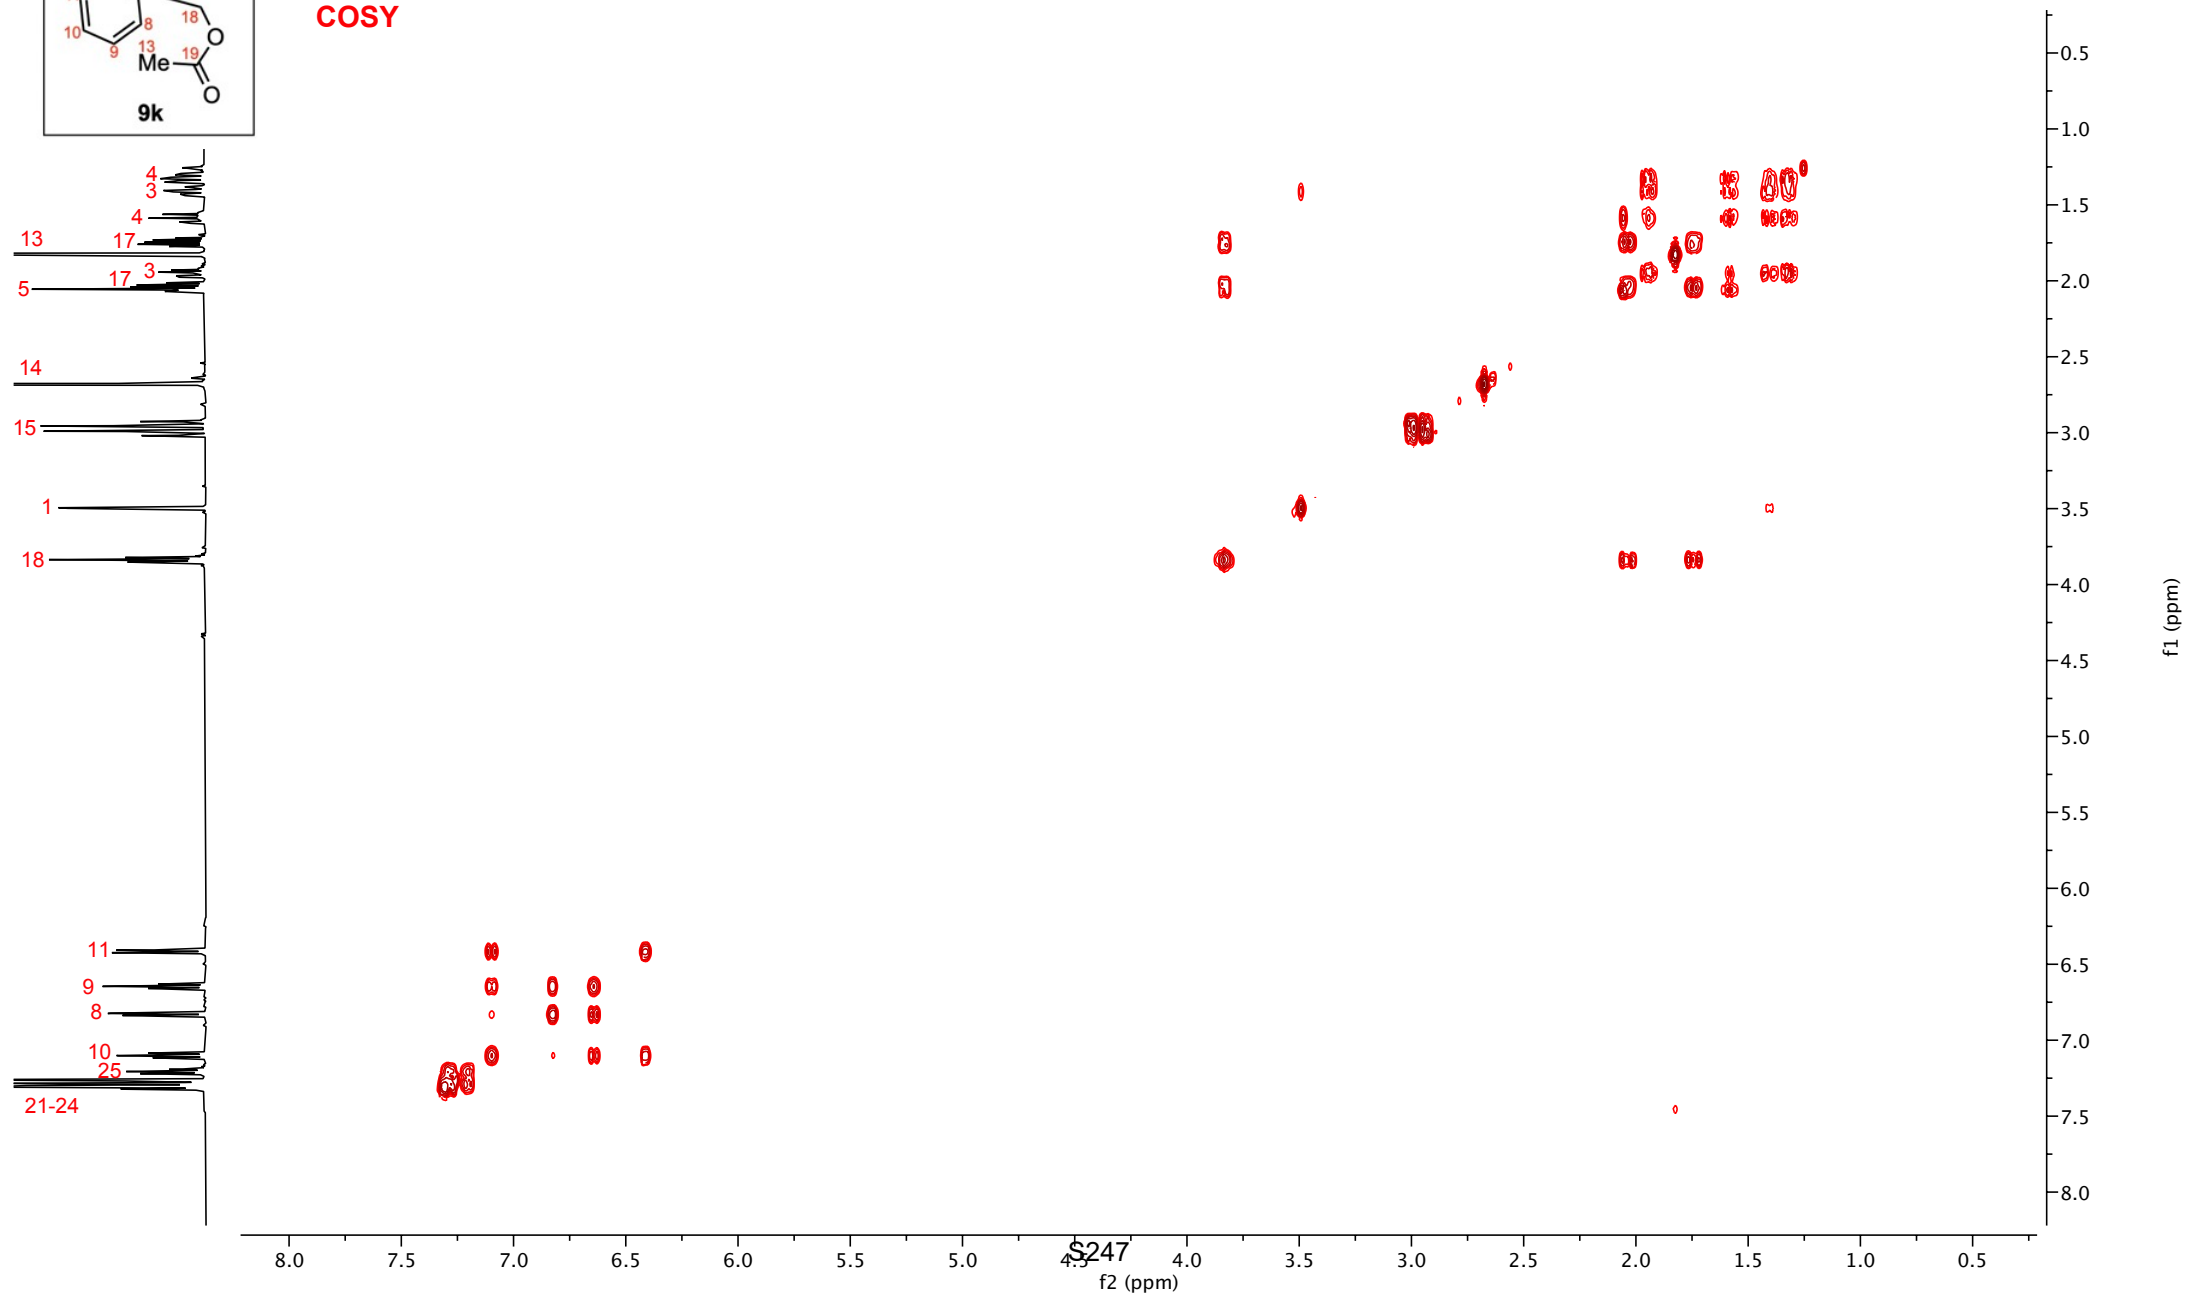



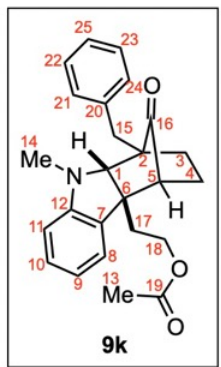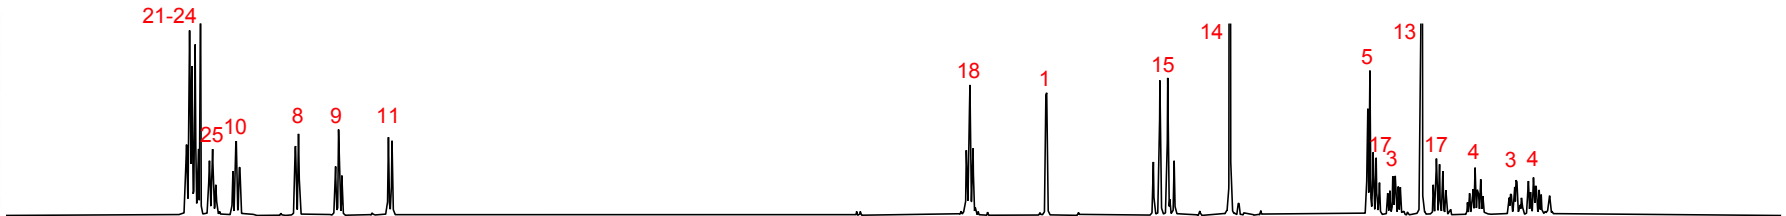

**HSQC**

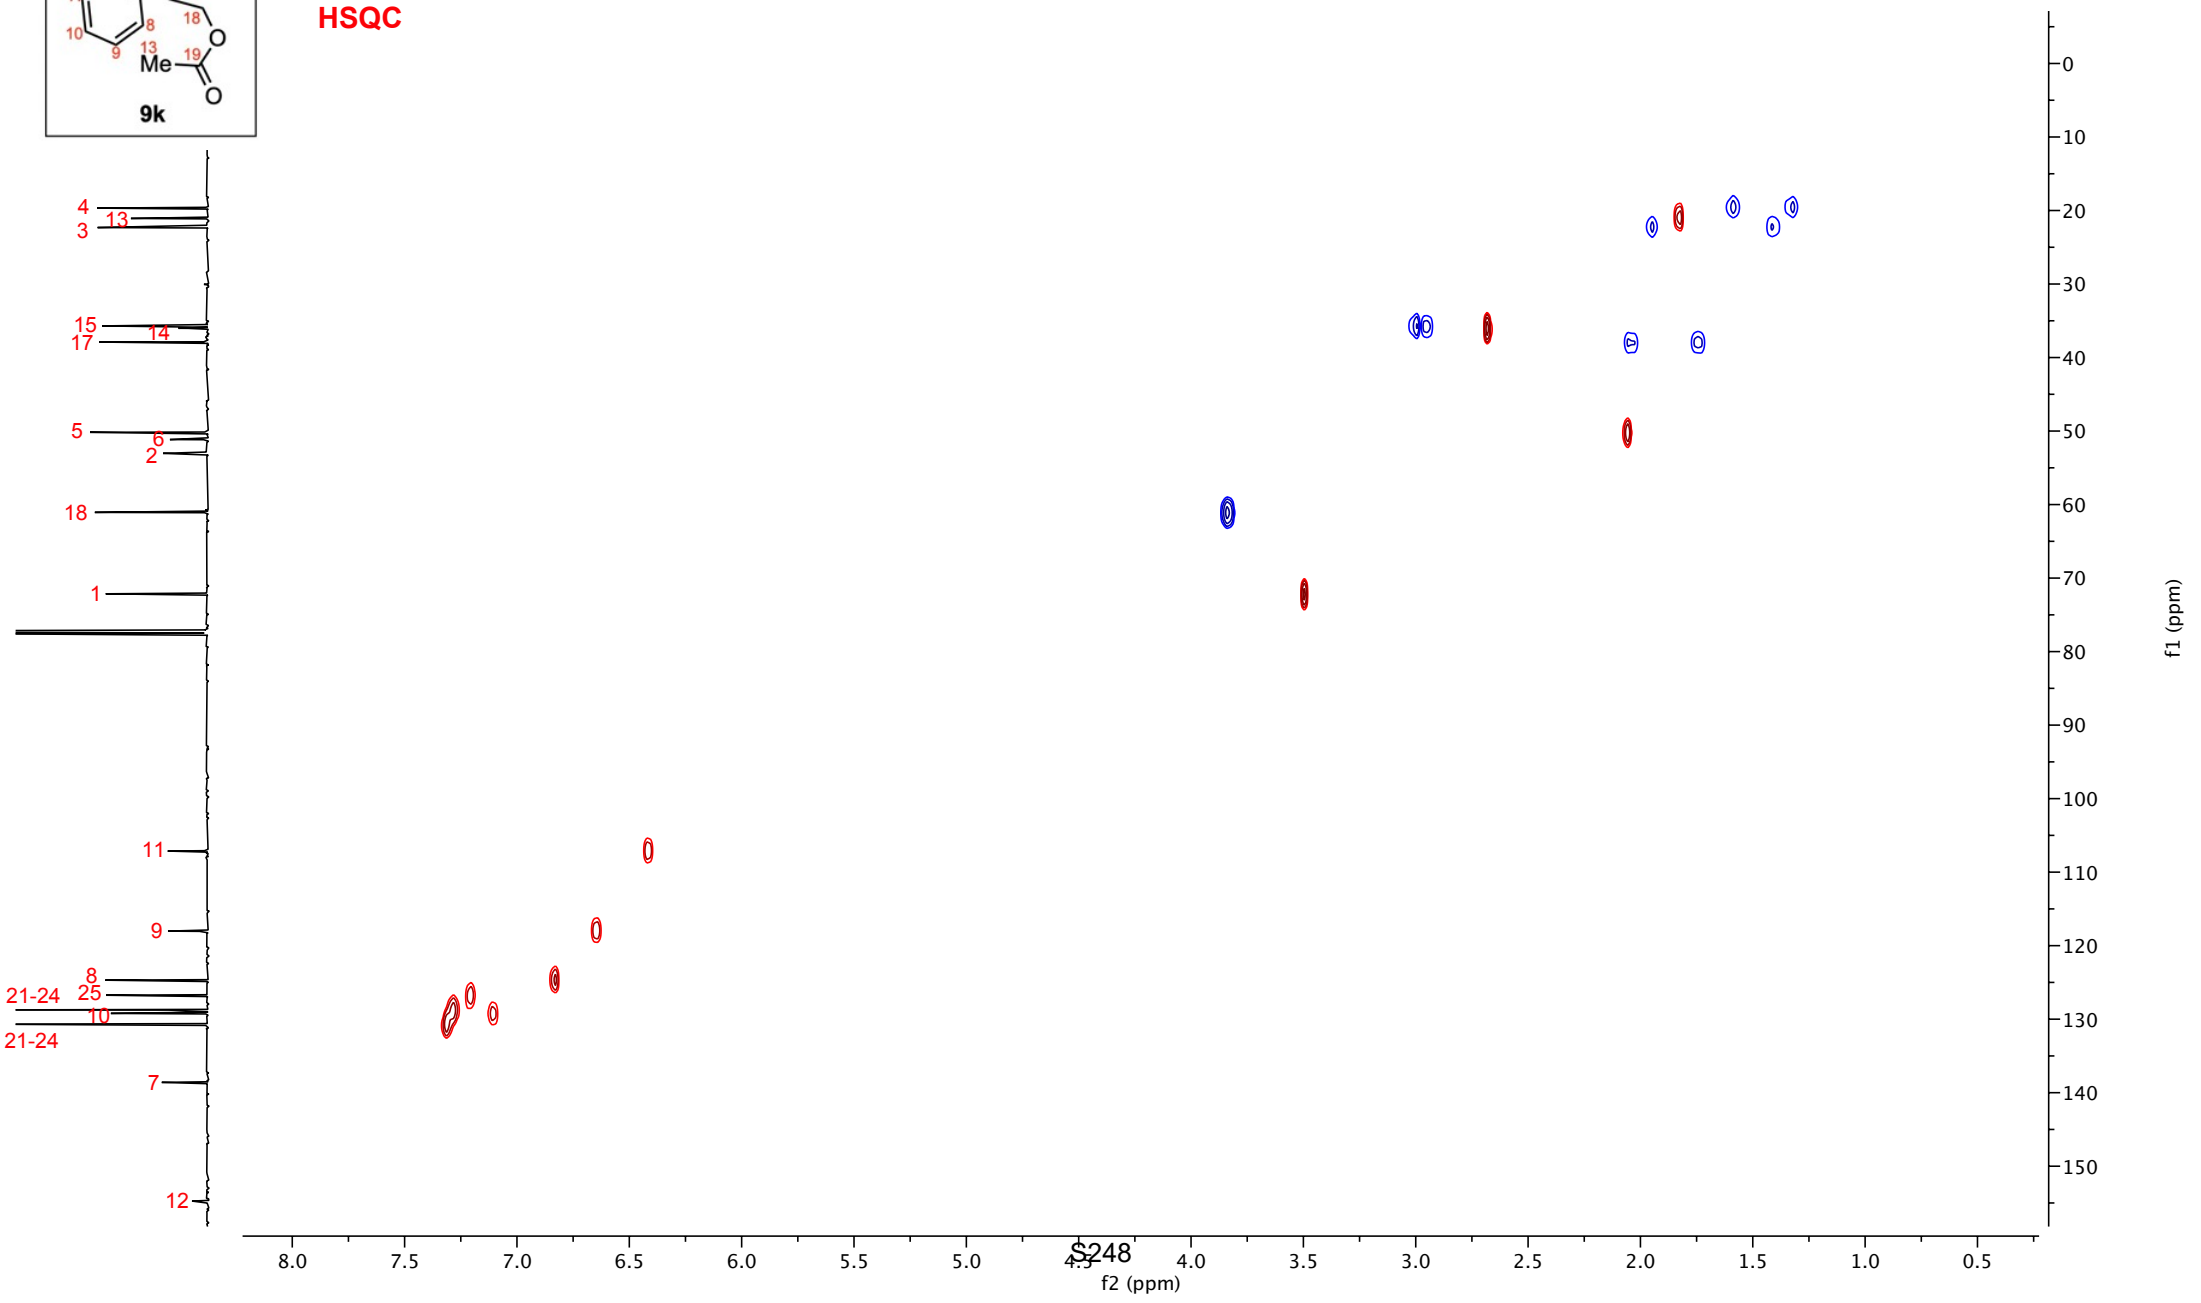

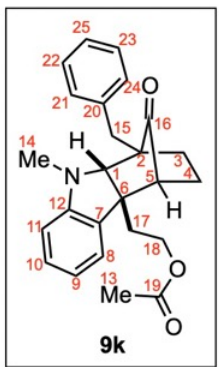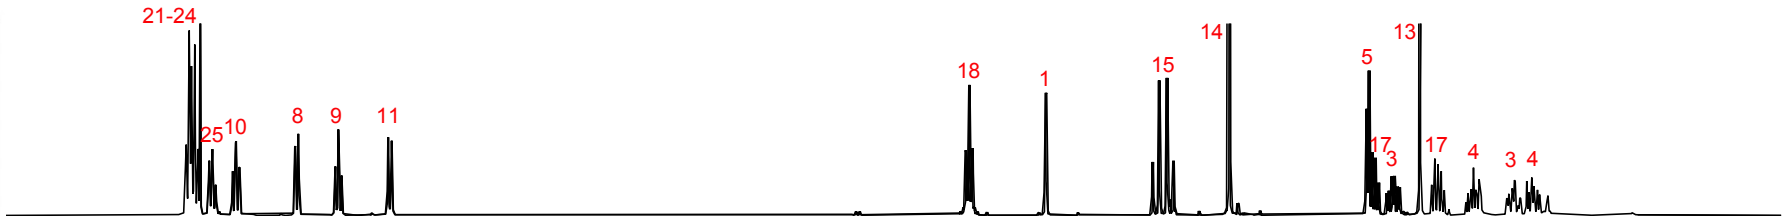

**HMBC**

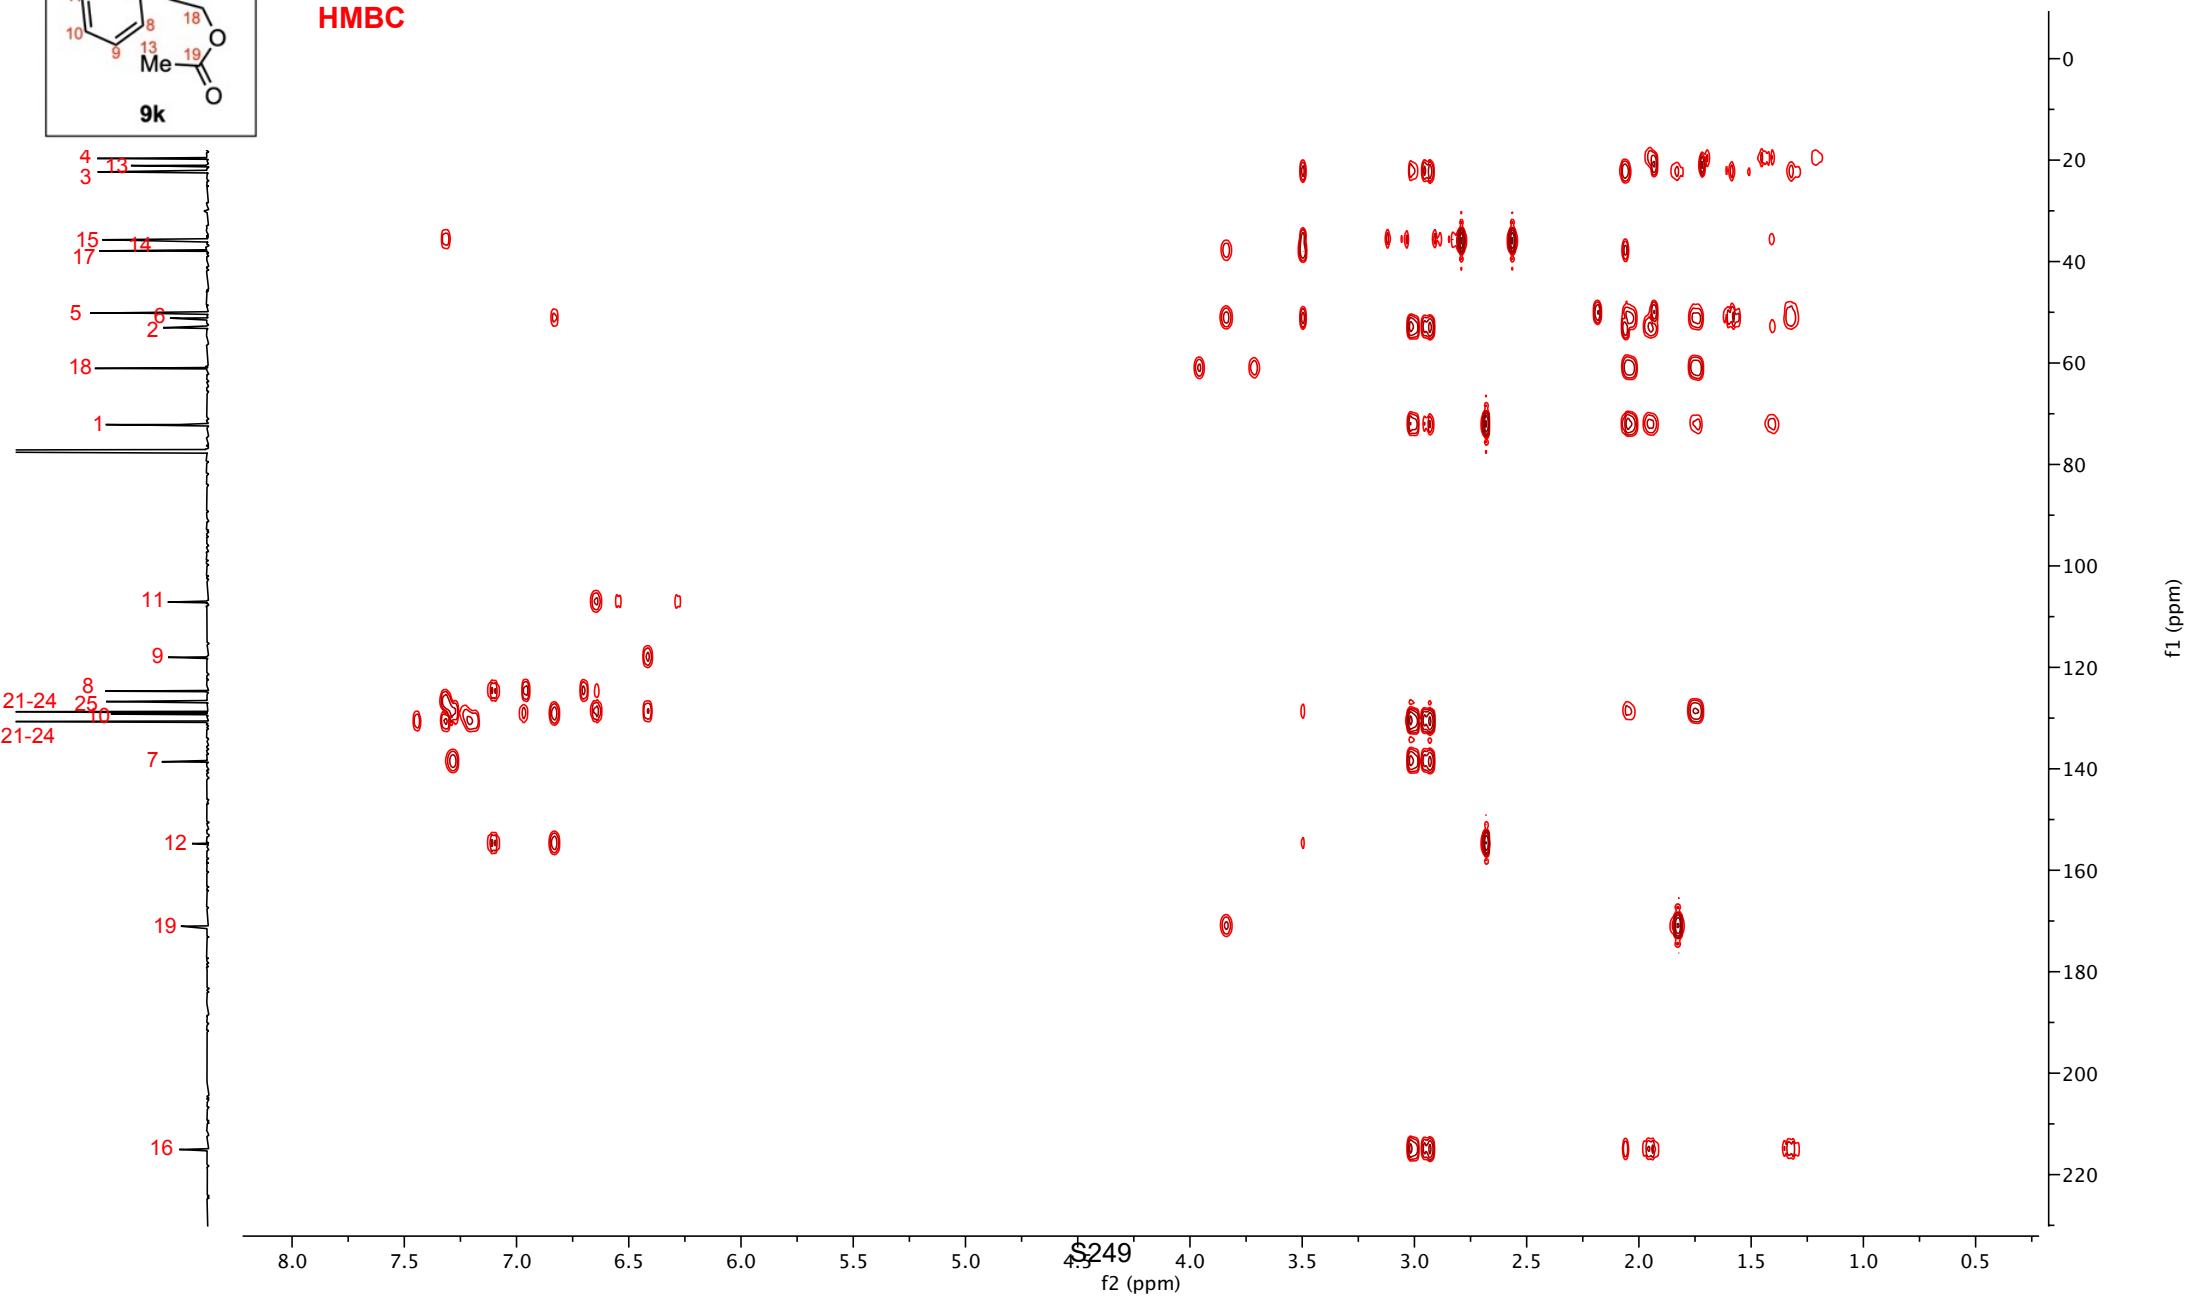

7.28  
7.27  
7.26  
7.25  
7.24  
7.24  
7.19  
7.18  
7.18  
7.17  
7.17  
7.16  
7.08  
7.07  
7.06  
7.06  
7.05  
7.05  
6.89  
6.89  
6.88  
6.87  
6.66  
6.65  
6.64  
6.40  
6.39

4.03  
4.02  
4.02  
4.01  
4.01  
4.00  
4.00  
3.99  
3.91  
3.90  
3.89  
3.88  
3.88  
3.87  
3.31  
3.15  
3.12

2.89  
2.75  
2.73  
2.17  
2.17  
2.15  
2.14  
2.13  
2.13  
2.11  
2.11  
2.10  
2.08  
2.07  
2.06  
2.05  
2.05  
2.04  
2.04  
1.99  
1.98  
1.97  
1.96  
1.96  
1.94  
1.93  
1.72  
1.71  
1.70  
1.69  
1.68  
1.68  
1.66  
1.66  
1.65  
1.65  
1.64  
1.52  
1.51  
1.50  
1.49  
1.49  
1.48

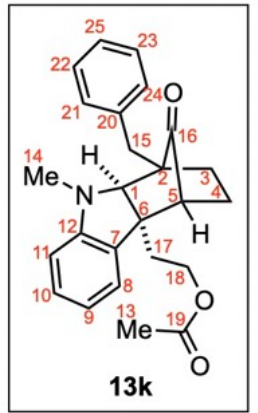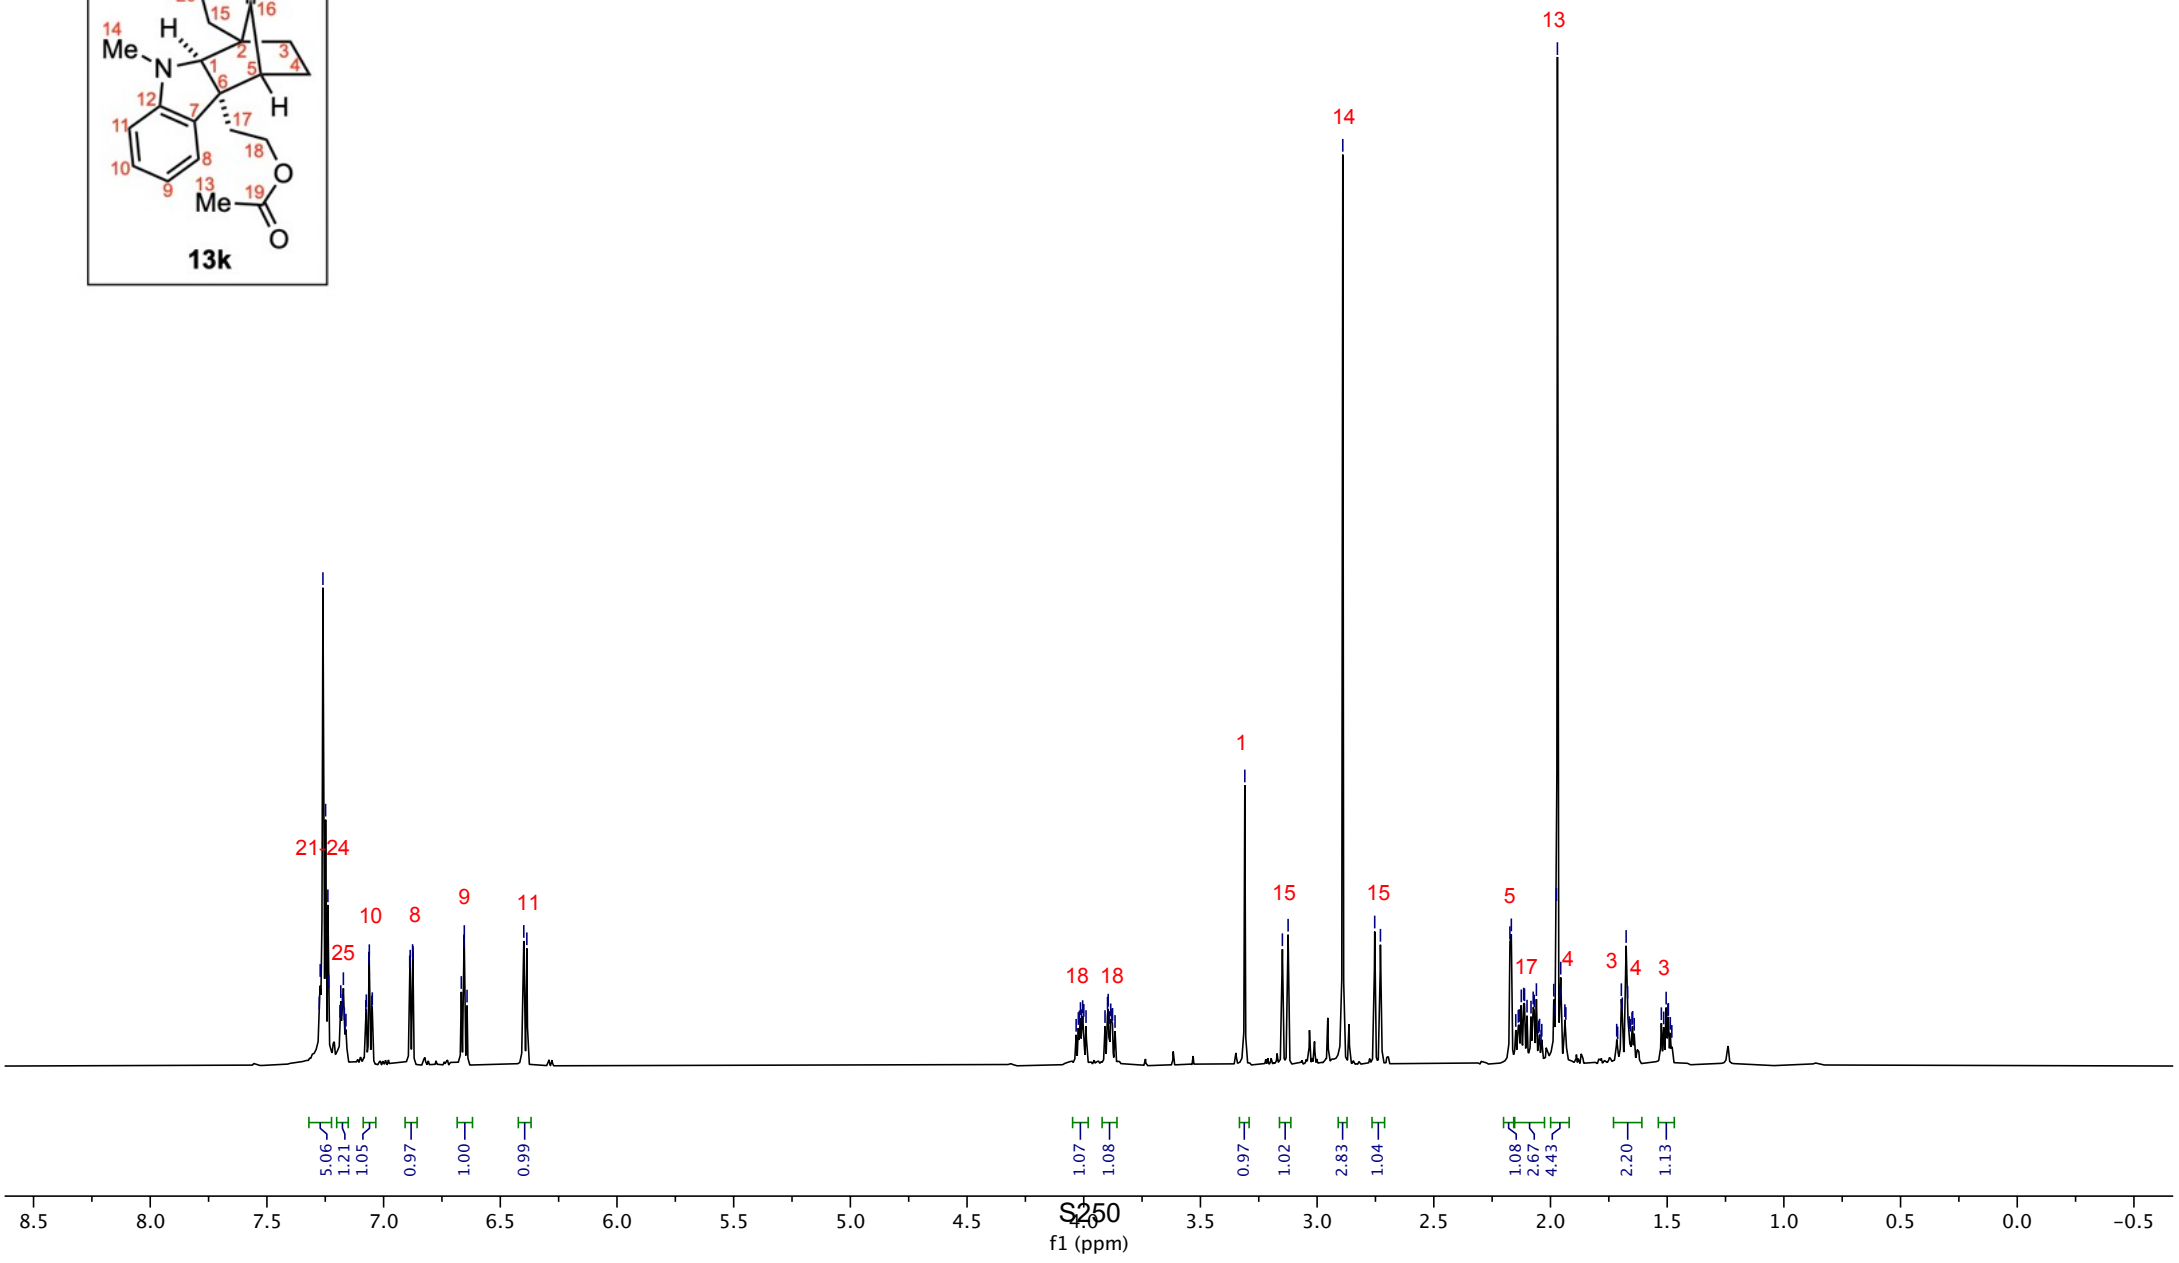

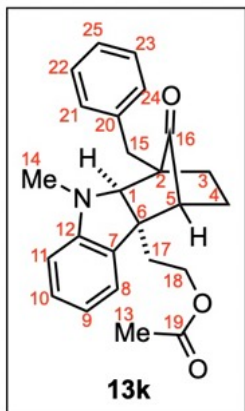

— 213.83

— 171.18

— 152.70

— 138.80

— 131.26  
 — 130.54  
 — 129.45  
 — 128.58  
 — 126.41  
 — 124.24

— 108.51

— 79.00

— 61.34

— 52.94  
 — 50.55  
 — 50.14

— 38.44  
 — 35.69  
 — 32.20

— 24.84  
 — 21.29  
 — 18.27

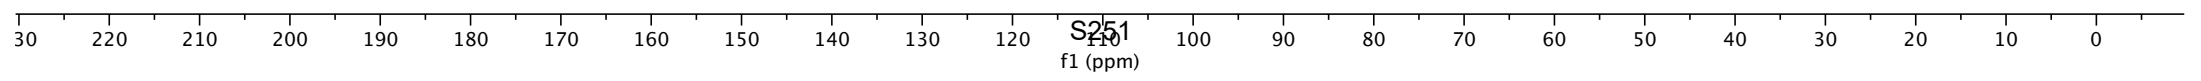

21-24  
 21-24

10  
 8  
 25

9

11

1

18

5

2

6

14

17

15

3

13

4

S251  
 110

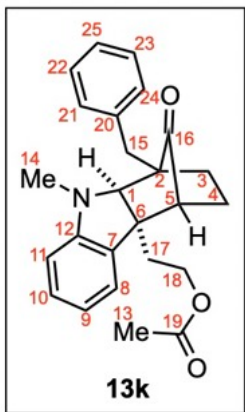

**COSY**

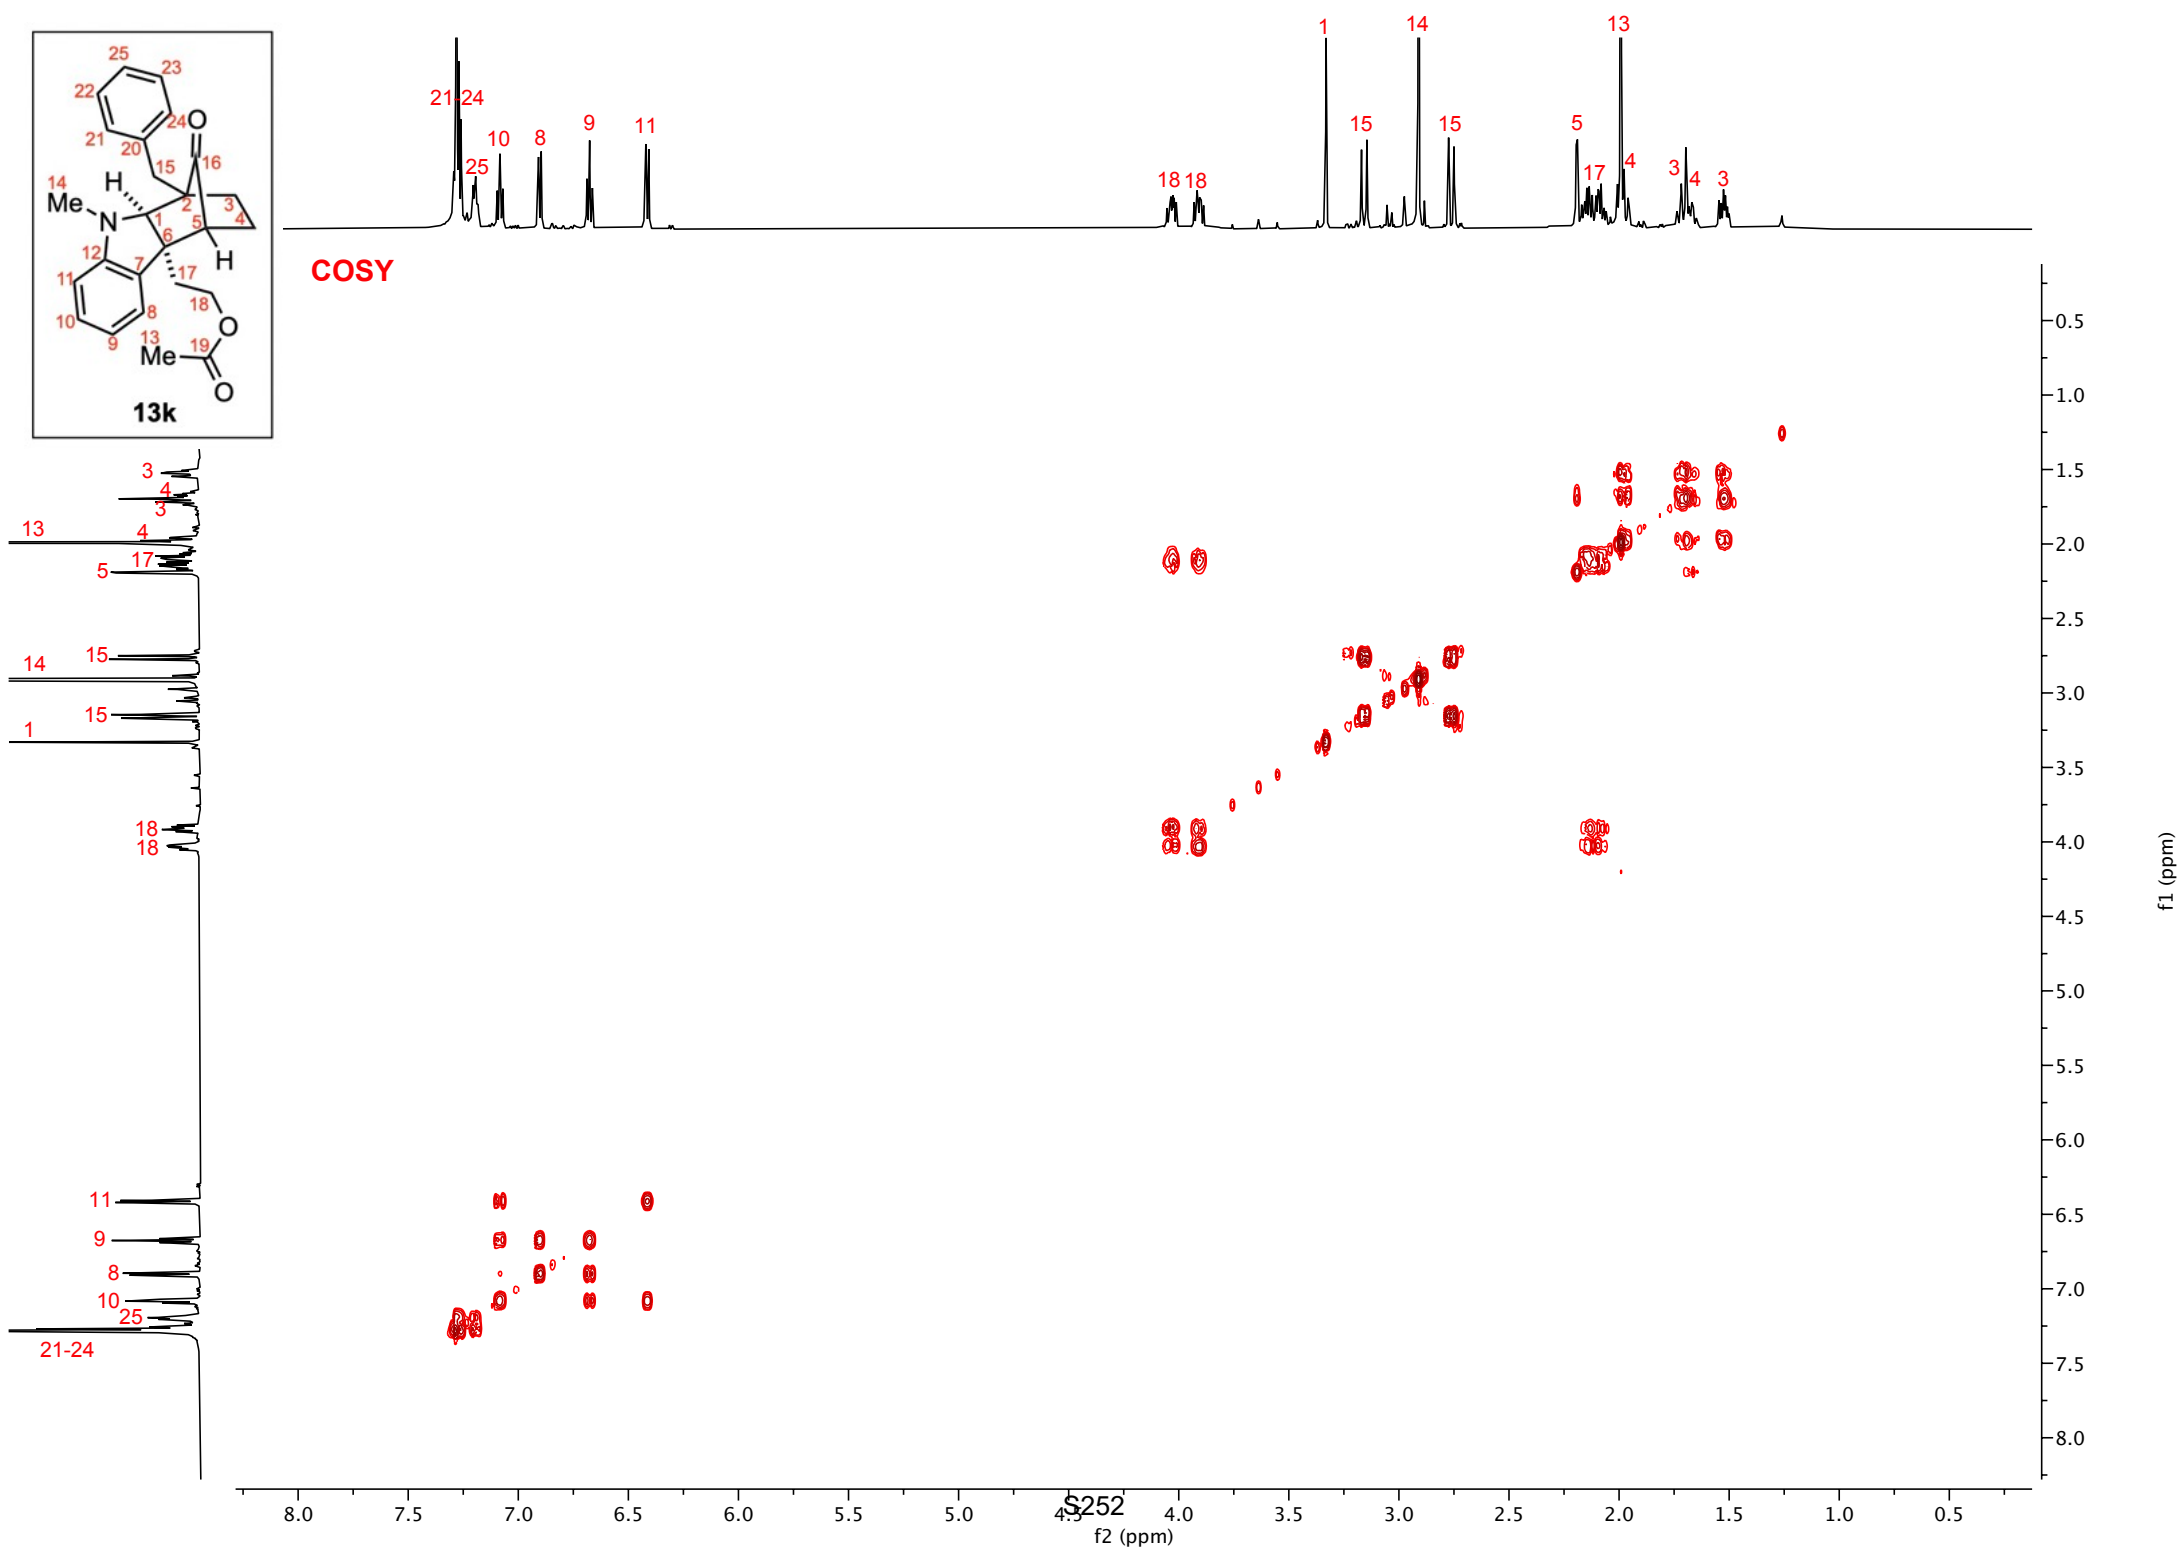

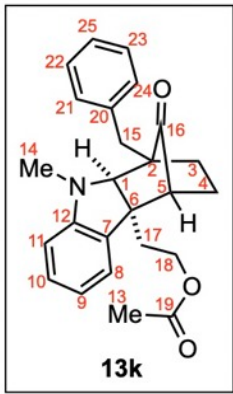

HSQC

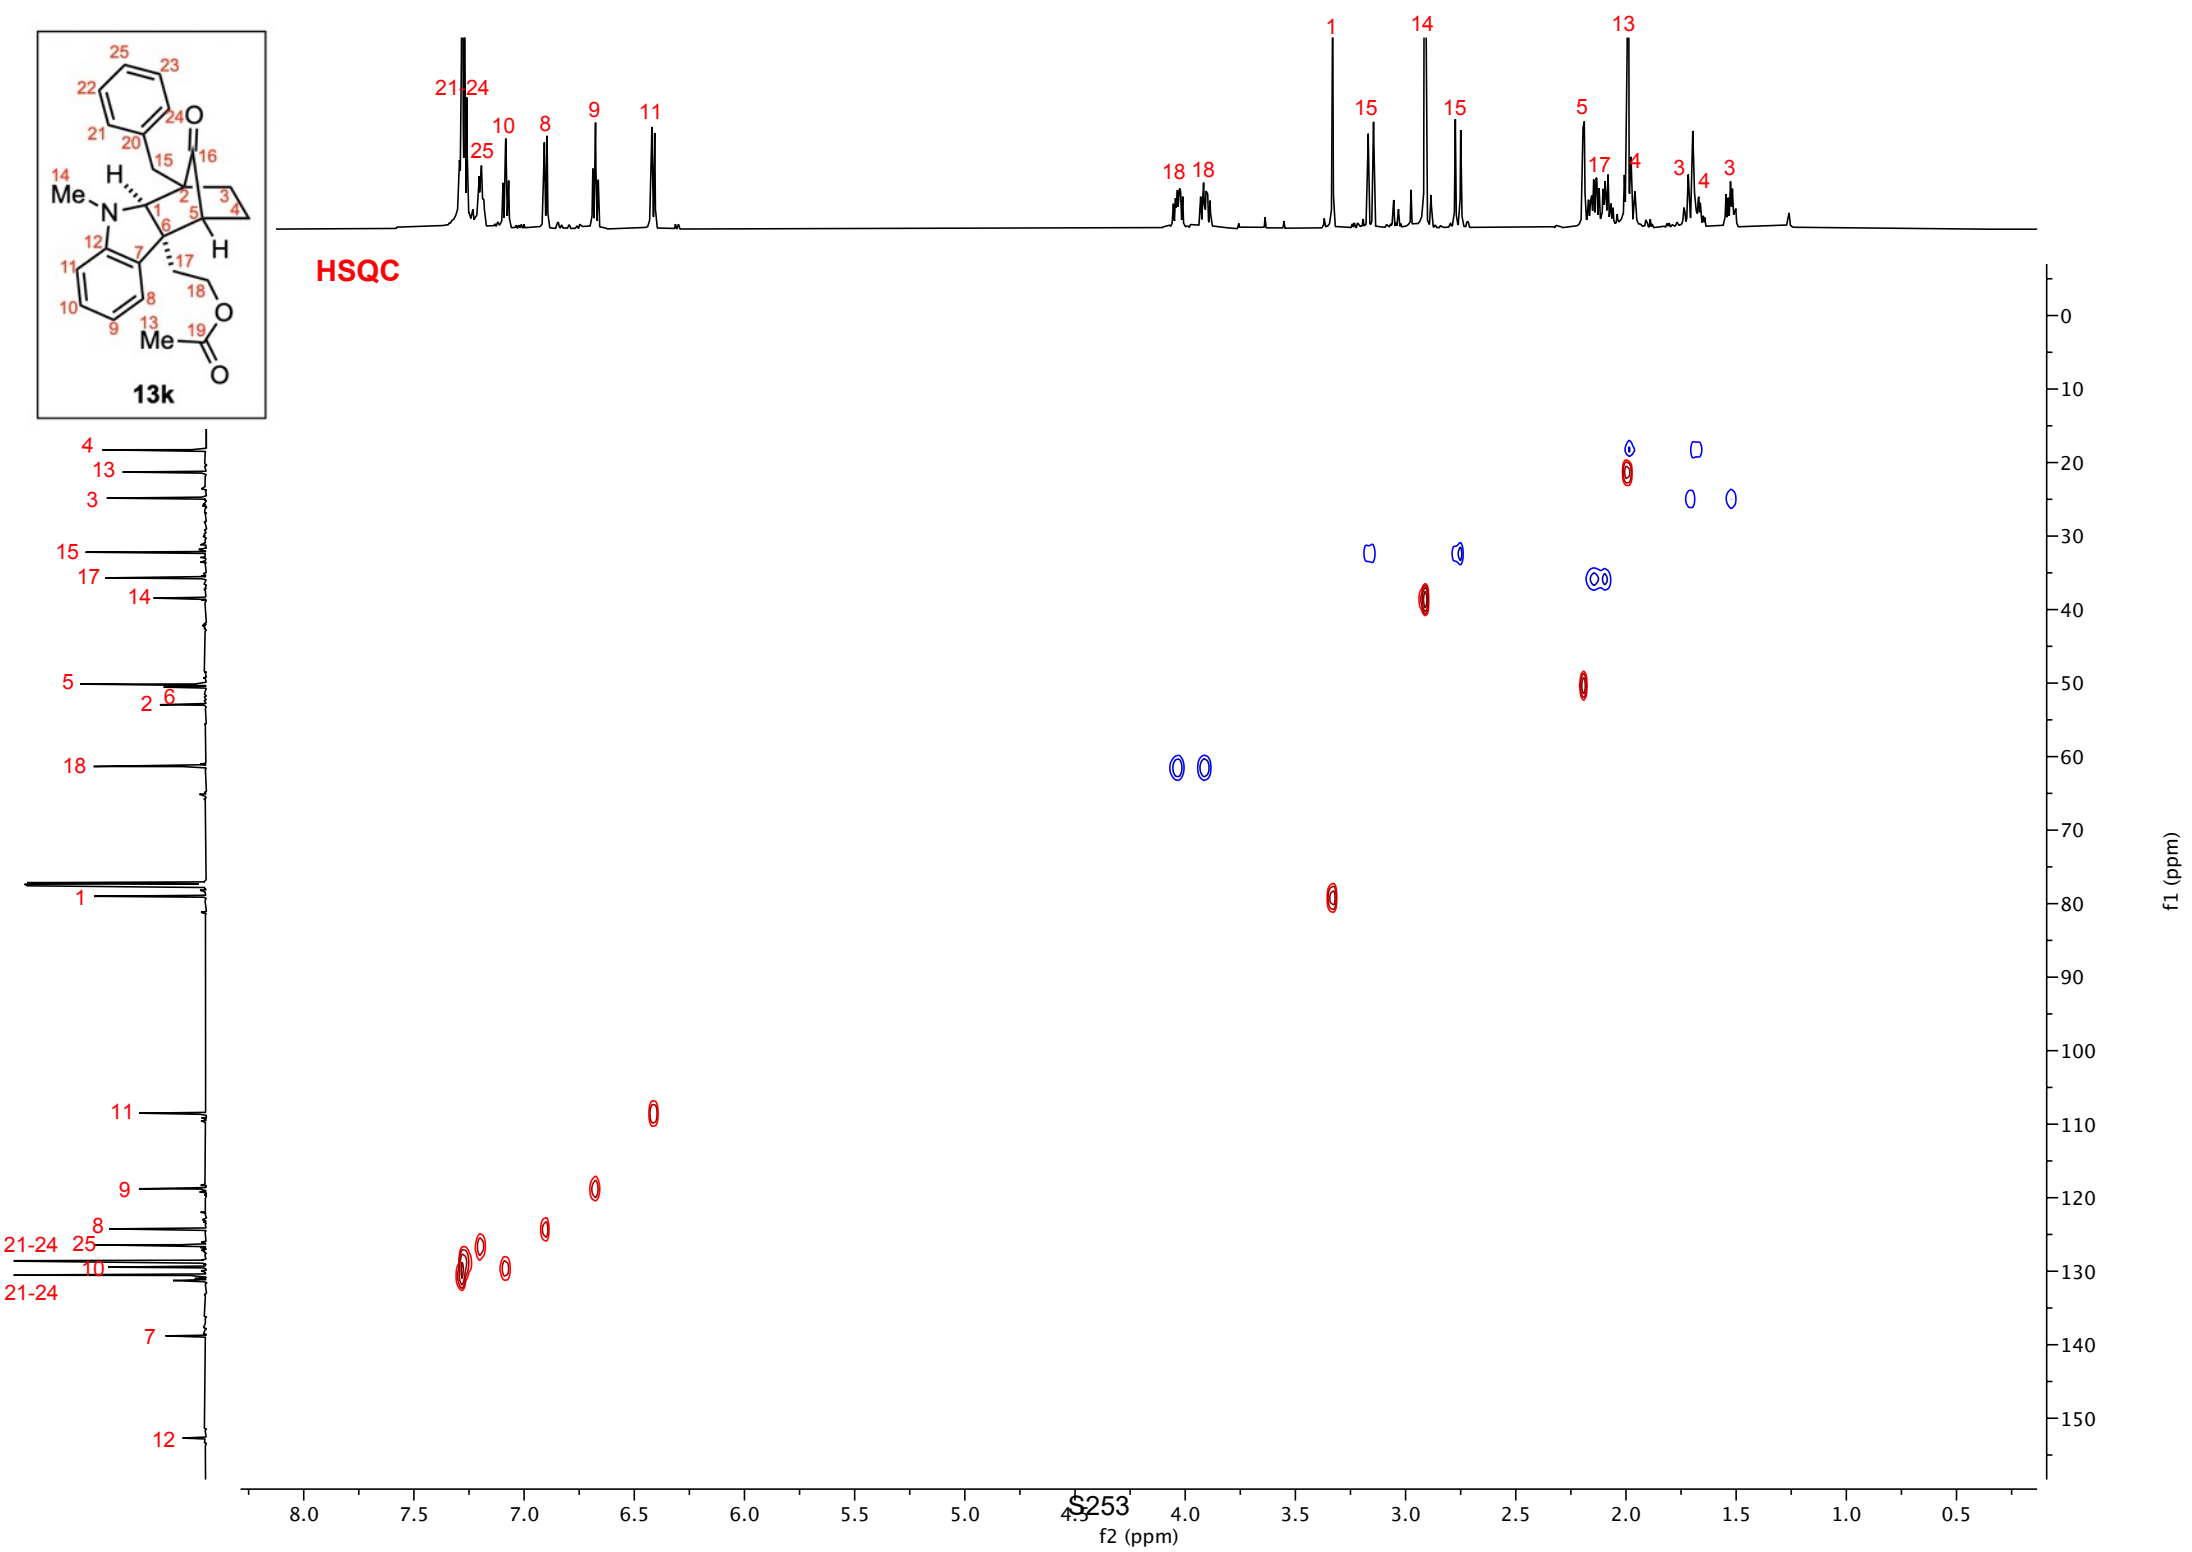

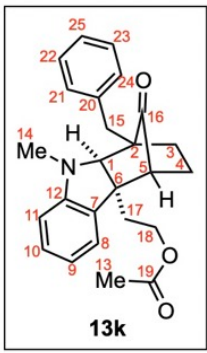

**HMBC**

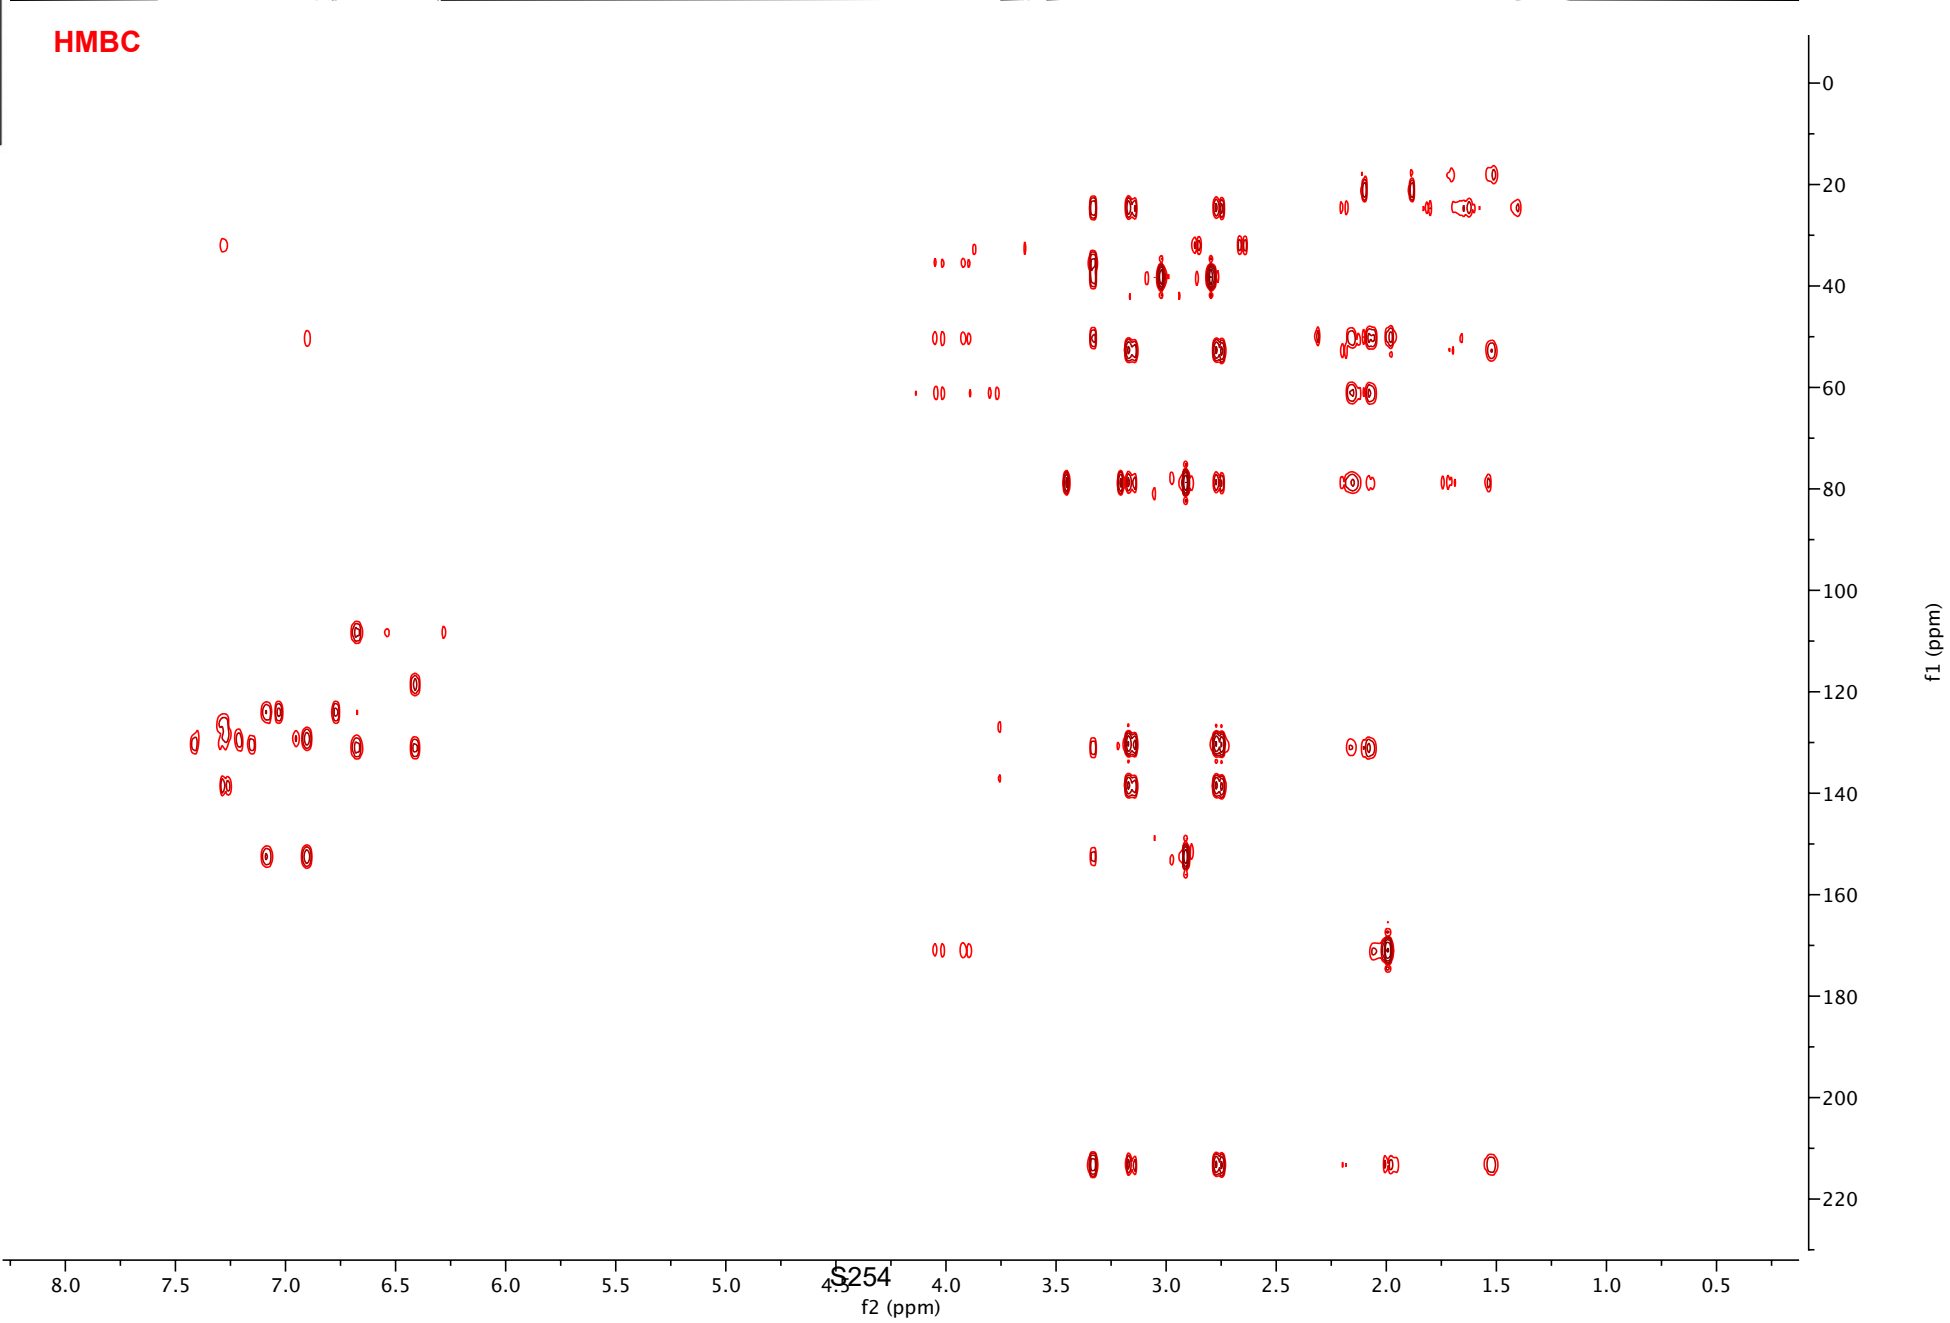

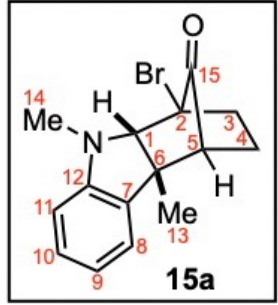

7.16  
7.15  
7.14  
7.13  
6.88  
6.87  
6.87  
6.68  
6.66  
6.65  
6.47  
6.46

3.73  
3.72

2.99  
2.43  
2.42  
2.41  
2.40  
2.40  
2.39  
2.38  
2.07  
2.06  
1.92  
1.91  
1.91  
1.90  
1.89  
1.89  
1.88  
1.87  
1.87  
1.83  
1.82  
1.82  
1.81  
1.80  
1.80  
1.79  
1.78  
1.77  
1.49  
1.48  
1.47  
1.47  
1.46  
1.46  
1.45  
1.44  
1.38

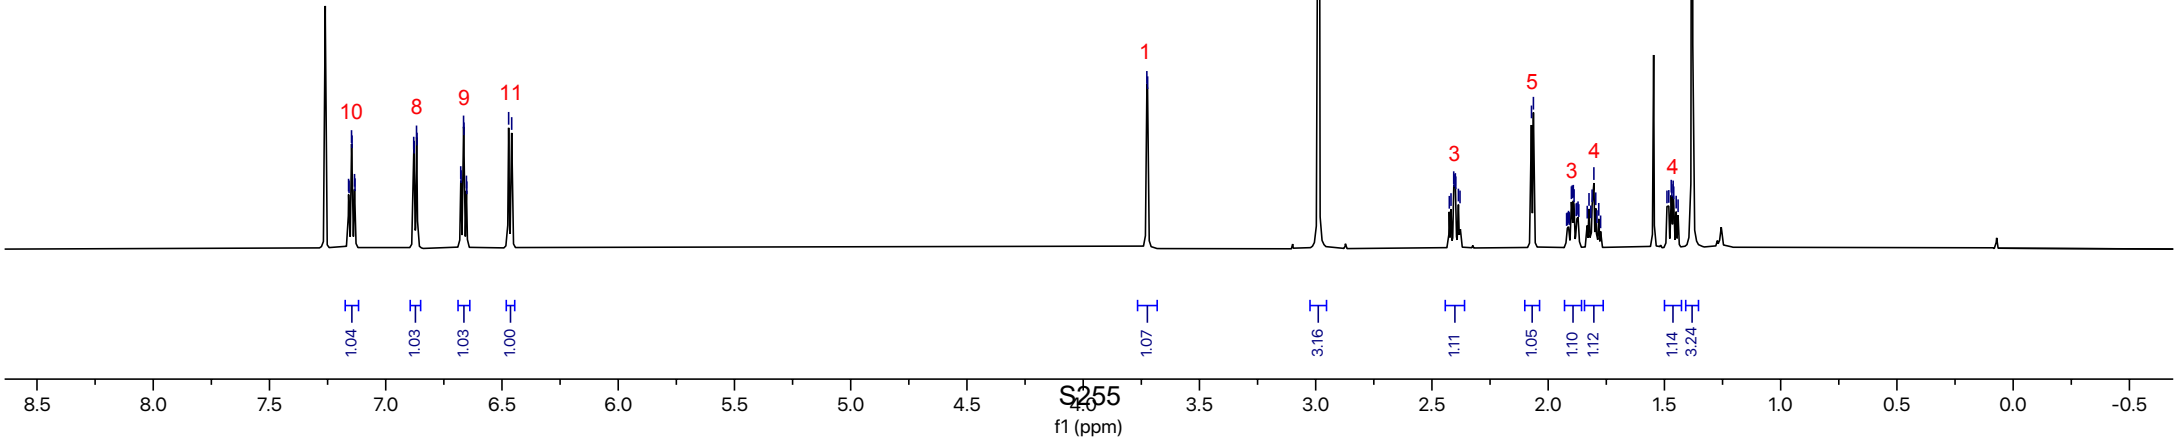



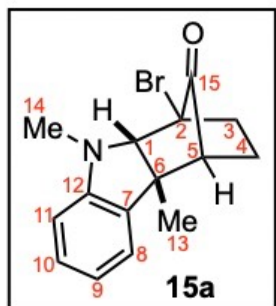

— 206.54

— 153.65

— 130.84

— 129.31

— 124.22

— 117.89

— 106.28

— 78.75

— 63.72

— 50.80

— 45.81

— 34.93

— 28.19

— 26.50

— 21.77

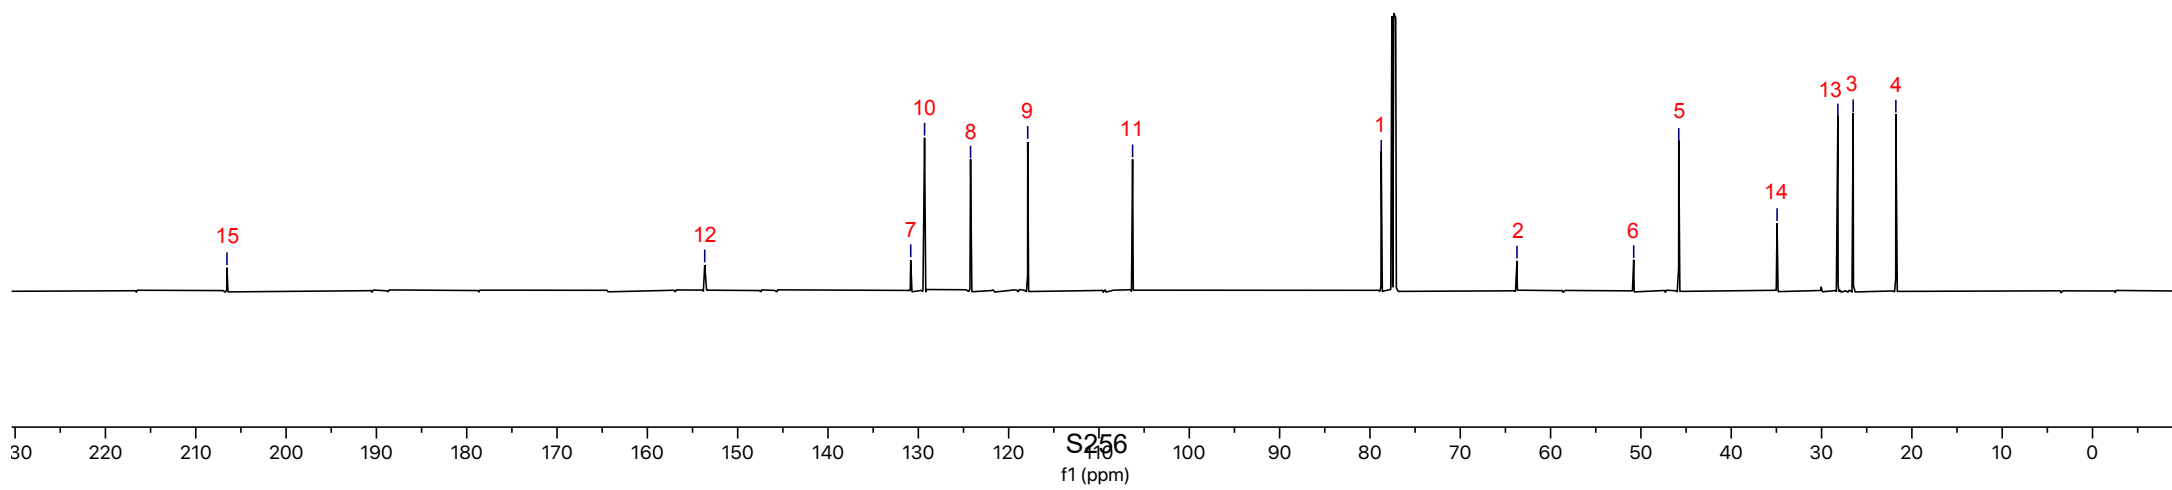

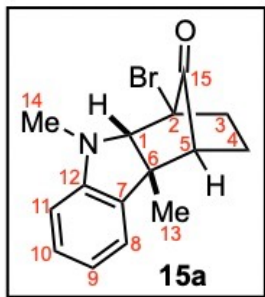

**COSY**

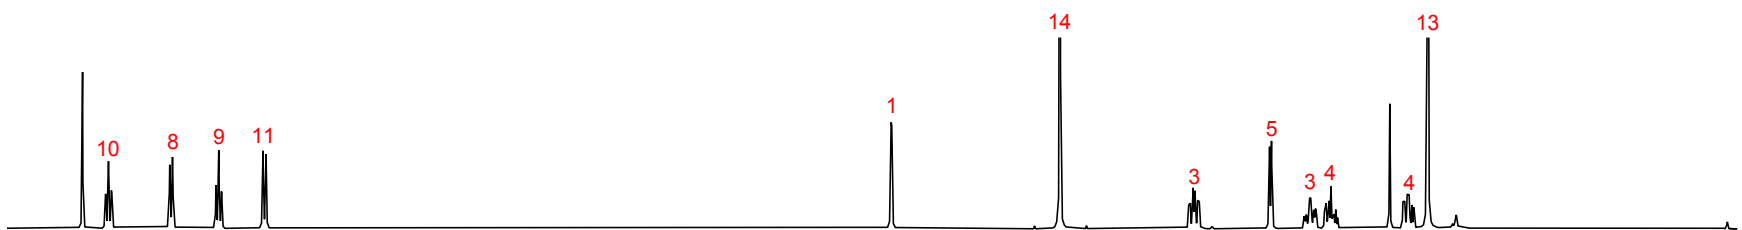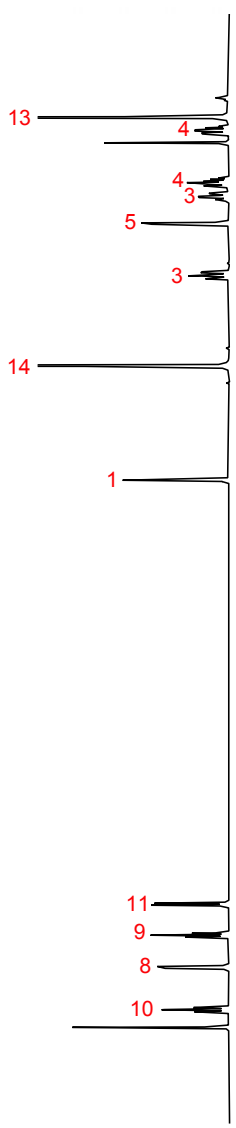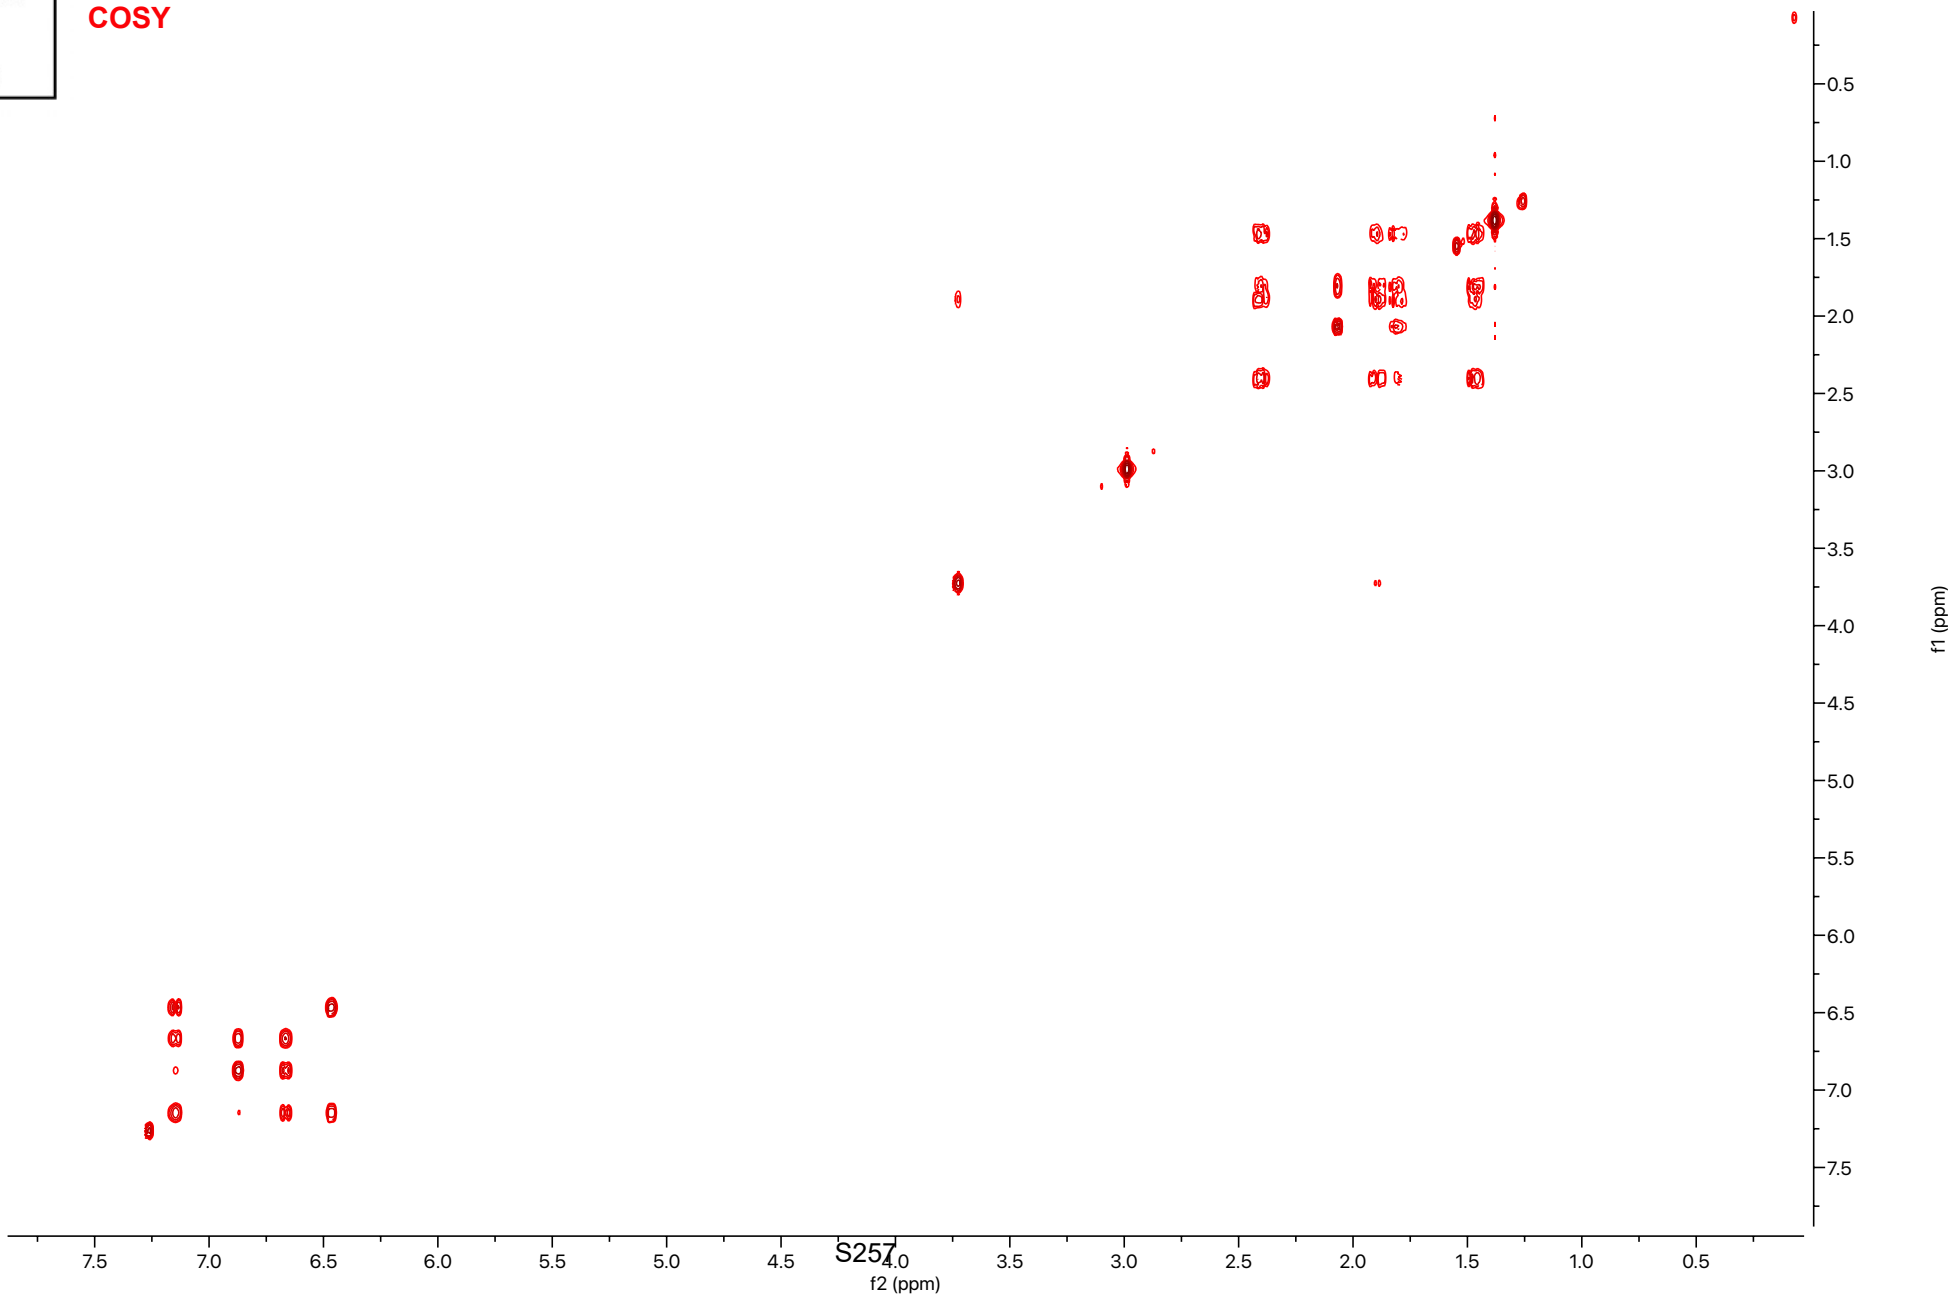



**HSQC**

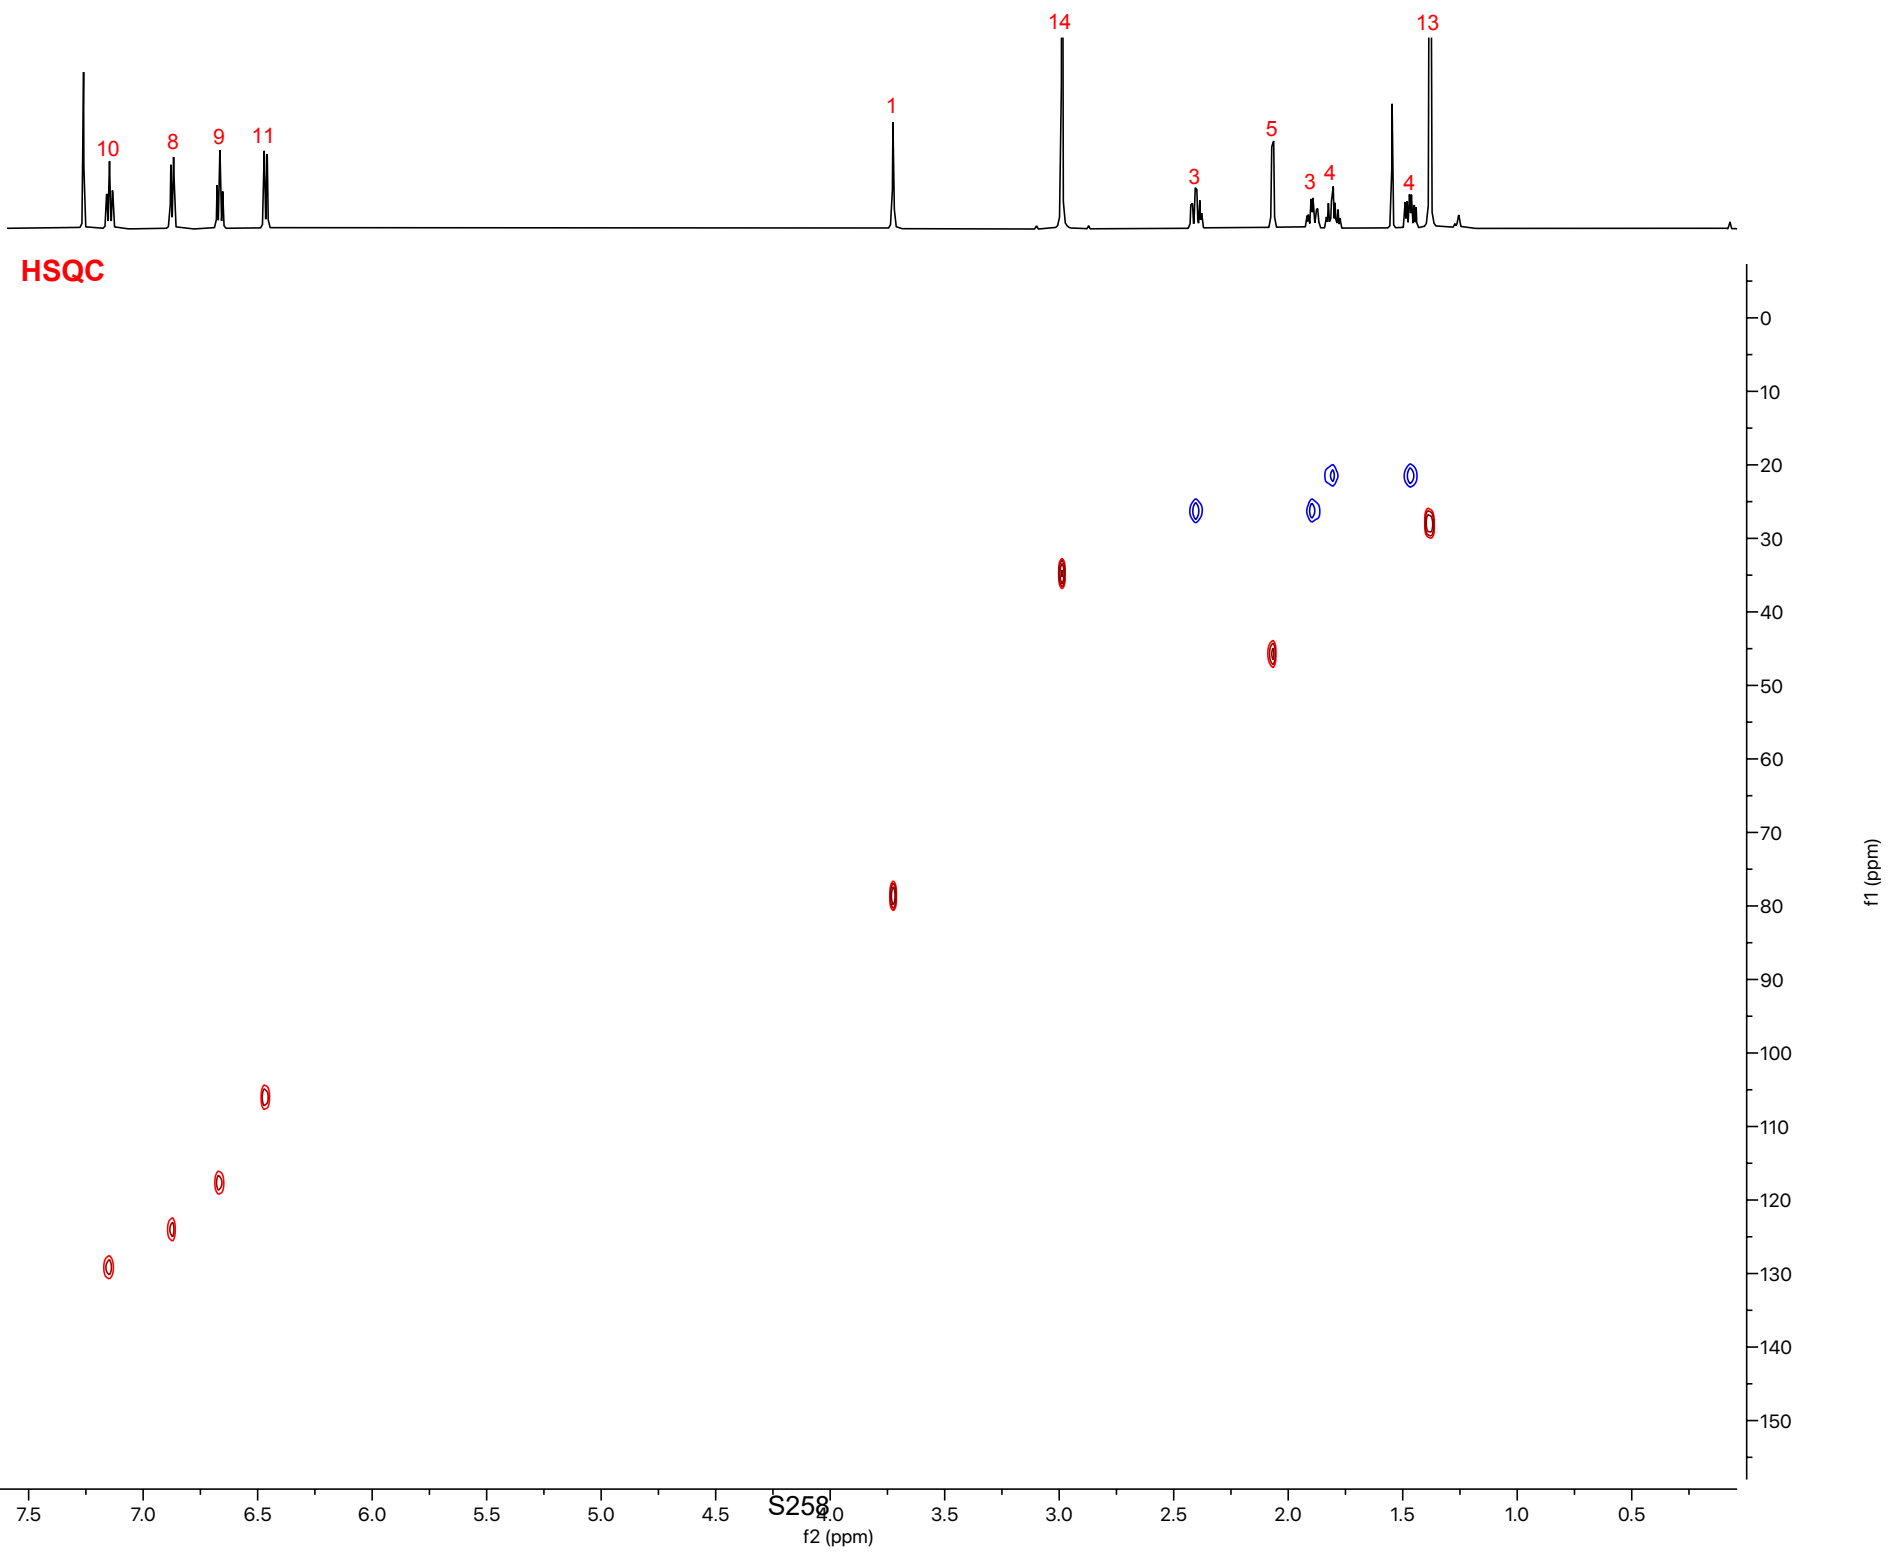



**HMBC**

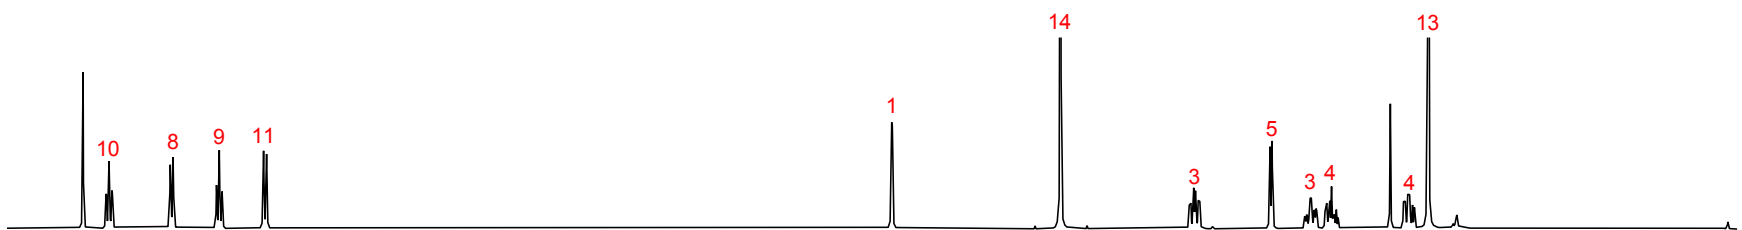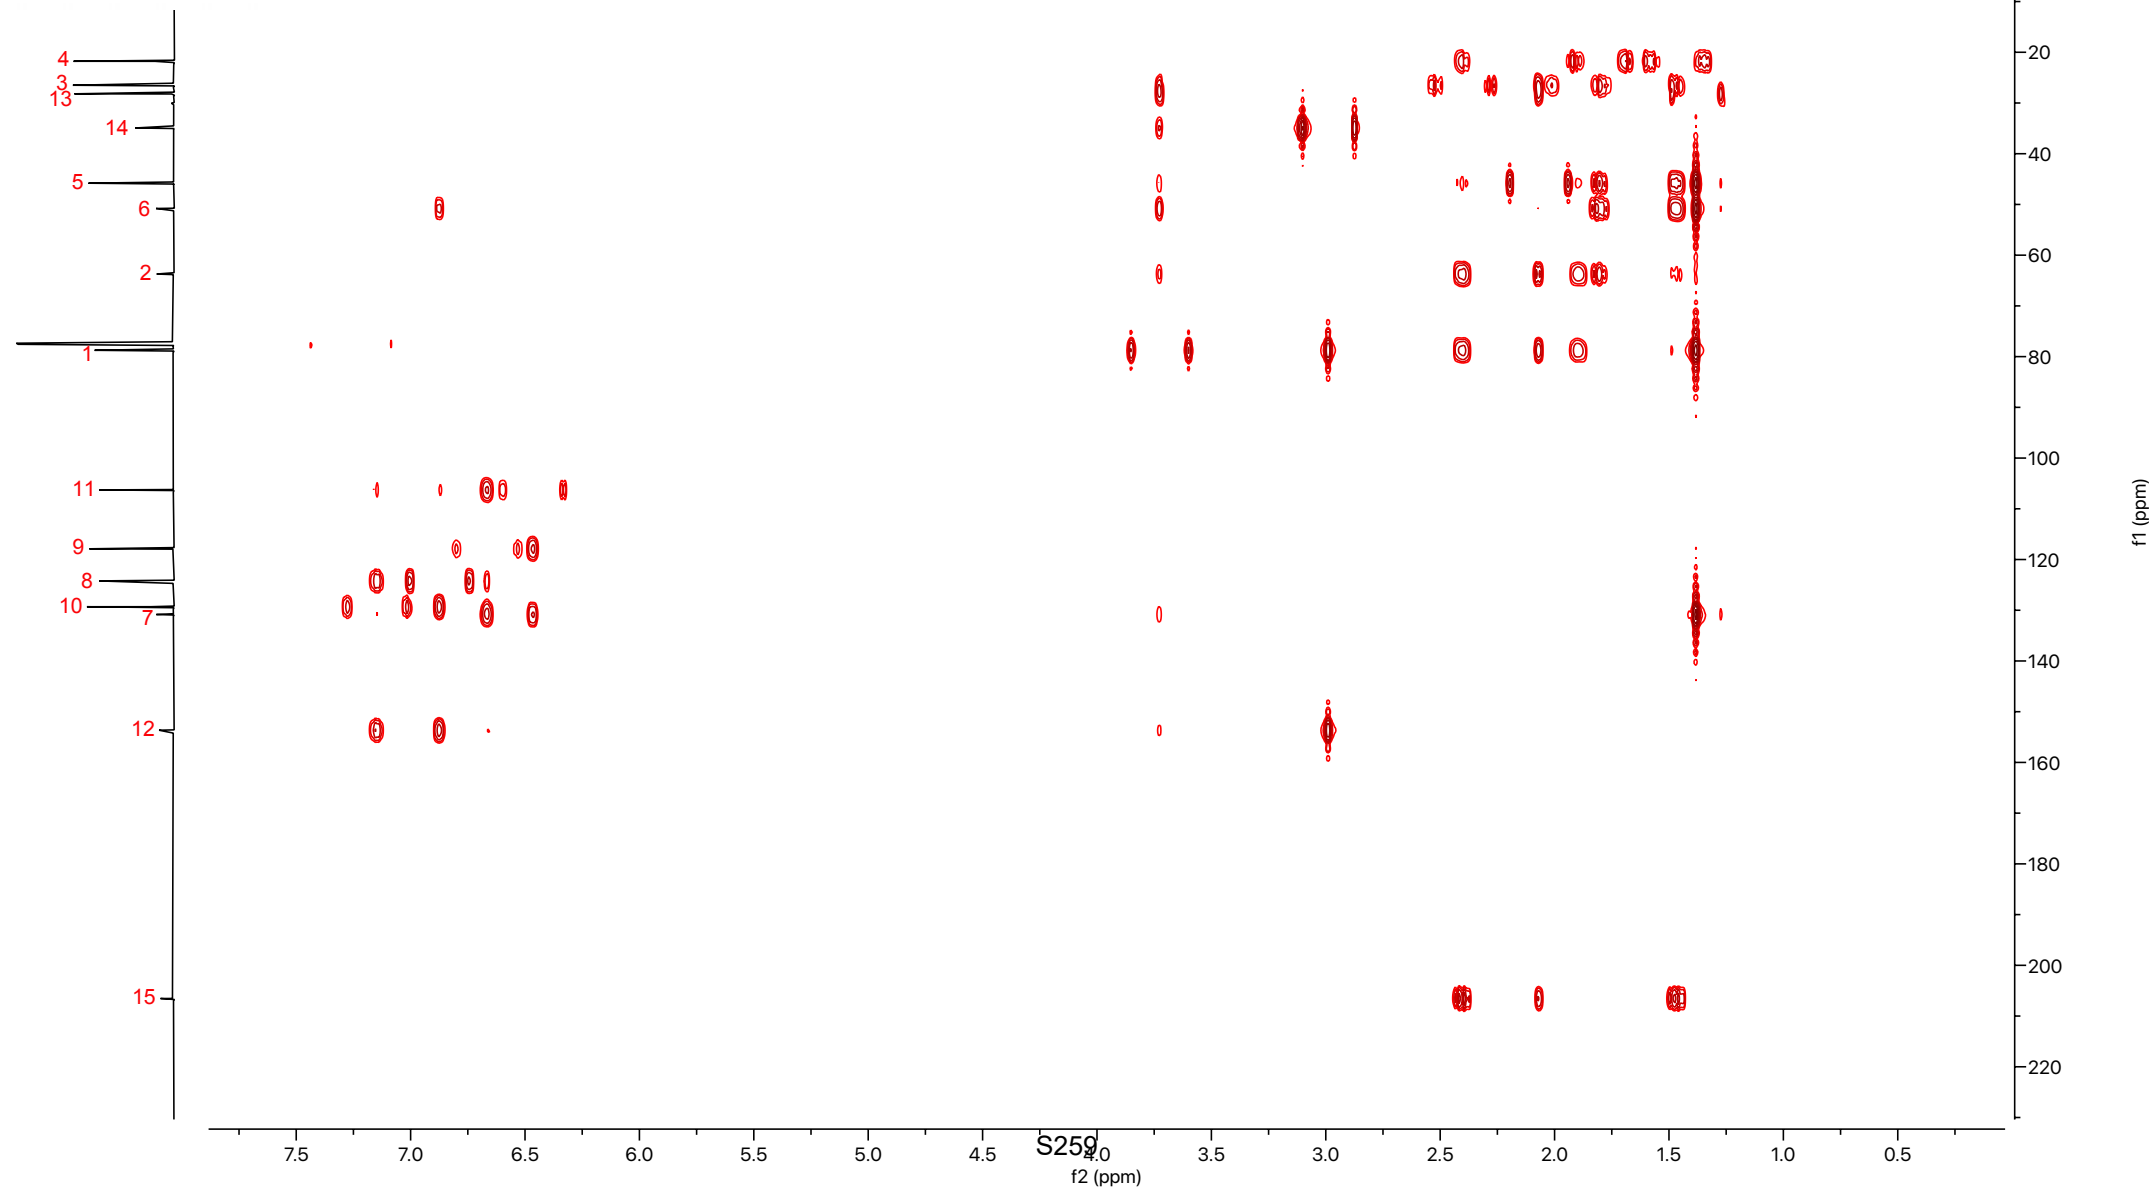

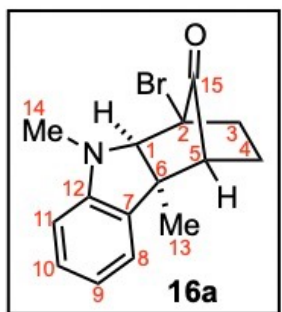

7.08  
7.07  
7.06  
7.05  
6.88  
6.87  
6.86  
6.67  
6.66  
6.65  
6.64  
6.64  
6.39  
6.37

2.31  
2.31  
2.29  
2.29  
2.27  
2.27  
2.27  
2.22  
2.21  
2.20  
2.20  
2.19  
2.19  
2.18  
2.18  
2.17  
2.15  
2.15  
2.13  
2.13  
2.12  
2.11  
2.11  
2.05  
2.03  
2.03  
2.02  
2.02  
2.01  
2.01  
2.01  
2.00  
2.00  
1.99  
1.99  
1.98  
1.97  
1.52

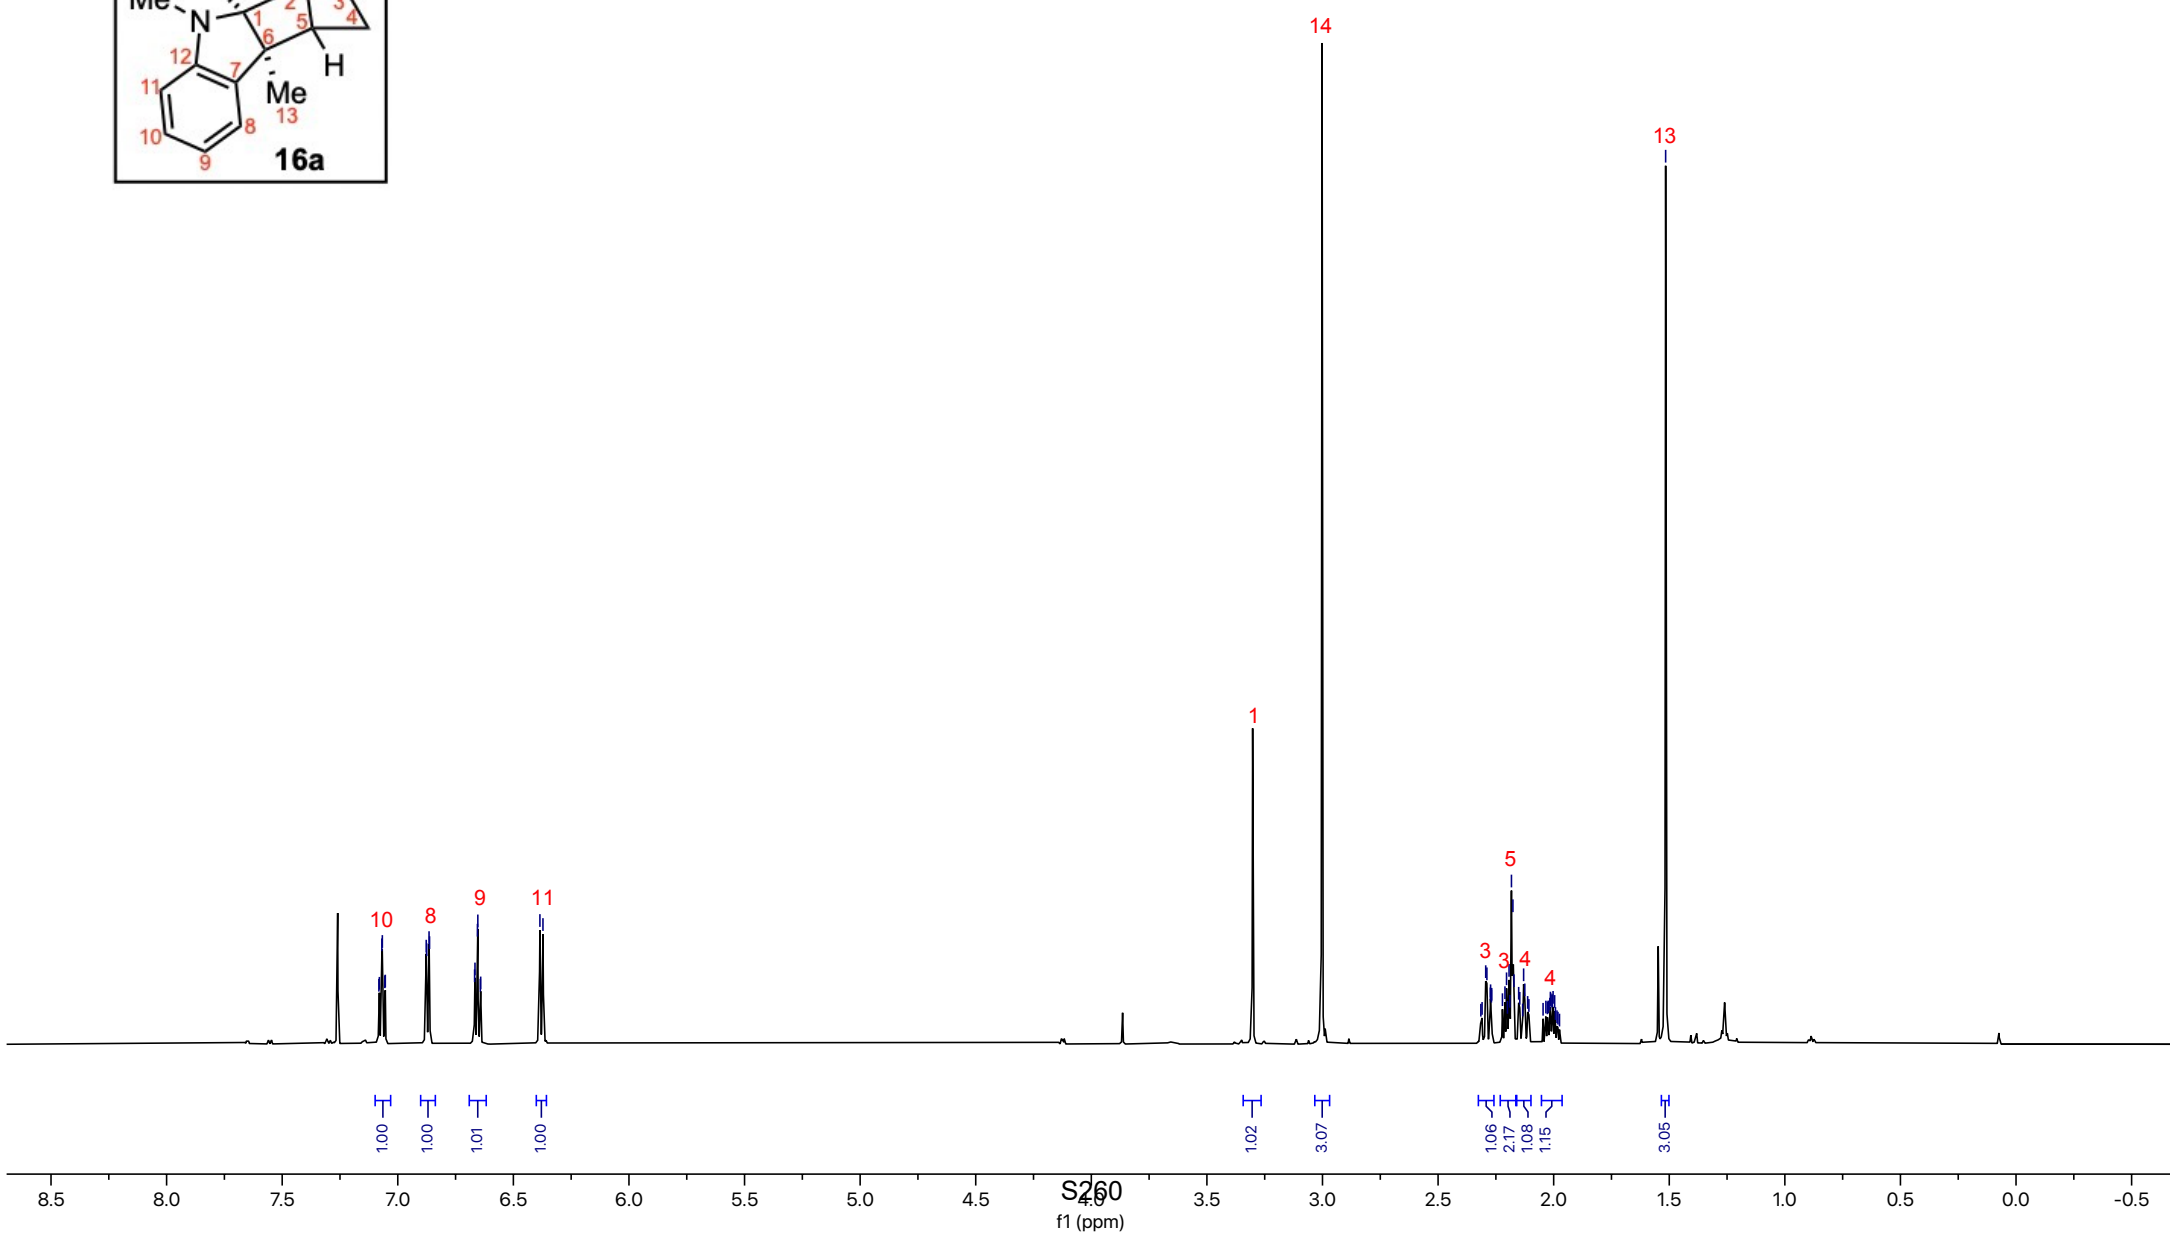



— 205.86

— 151.45

— 133.68

— 129.92

— 123.31

— 118.68

— 107.94

— 80.12

— 66.49

— 50.47

— 45.85

— 38.13

— 31.28

— 25.20

— 20.76

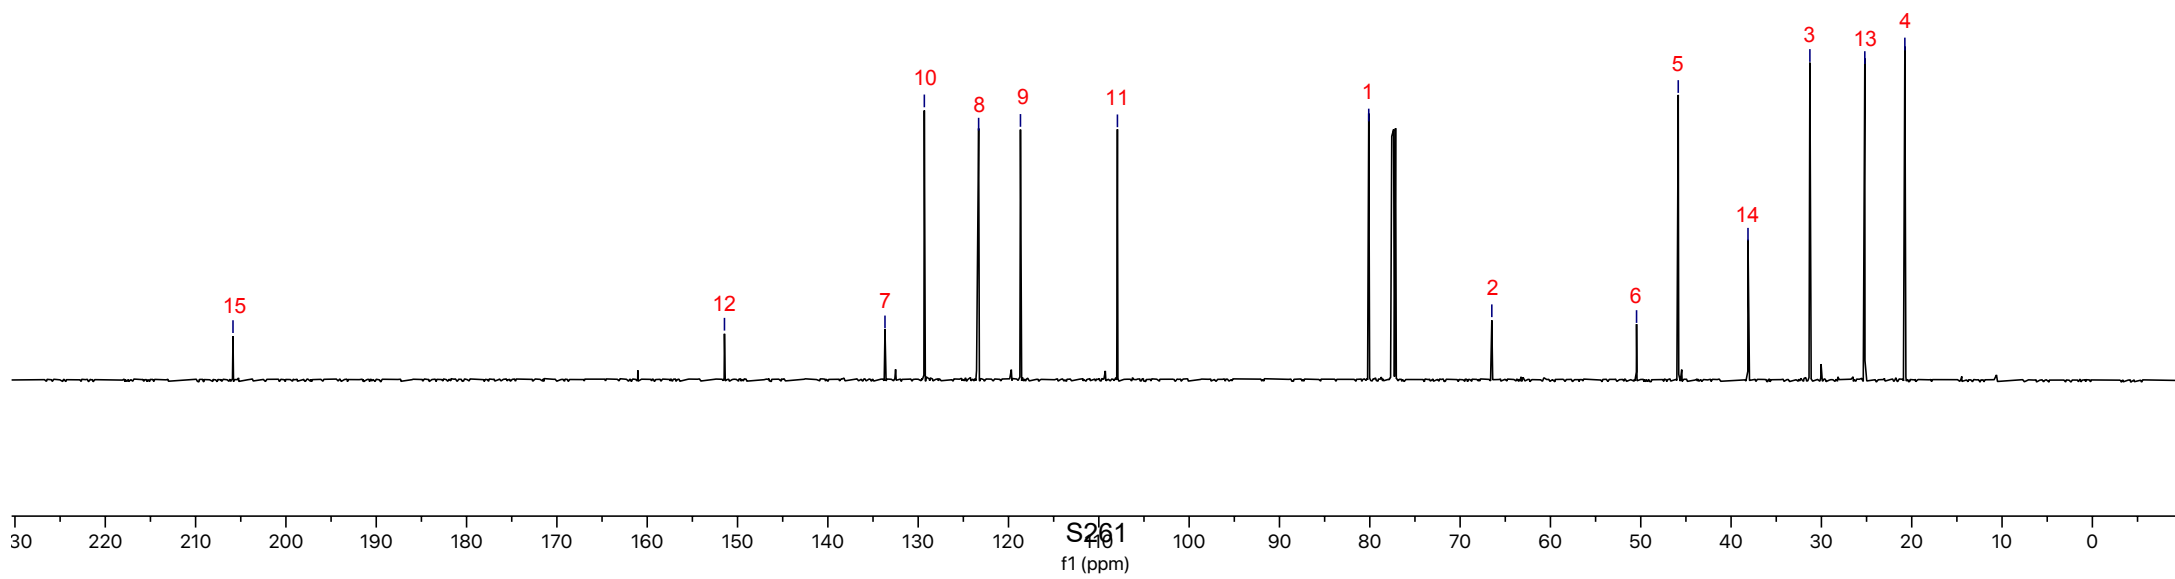

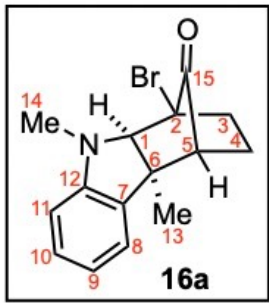

COSY

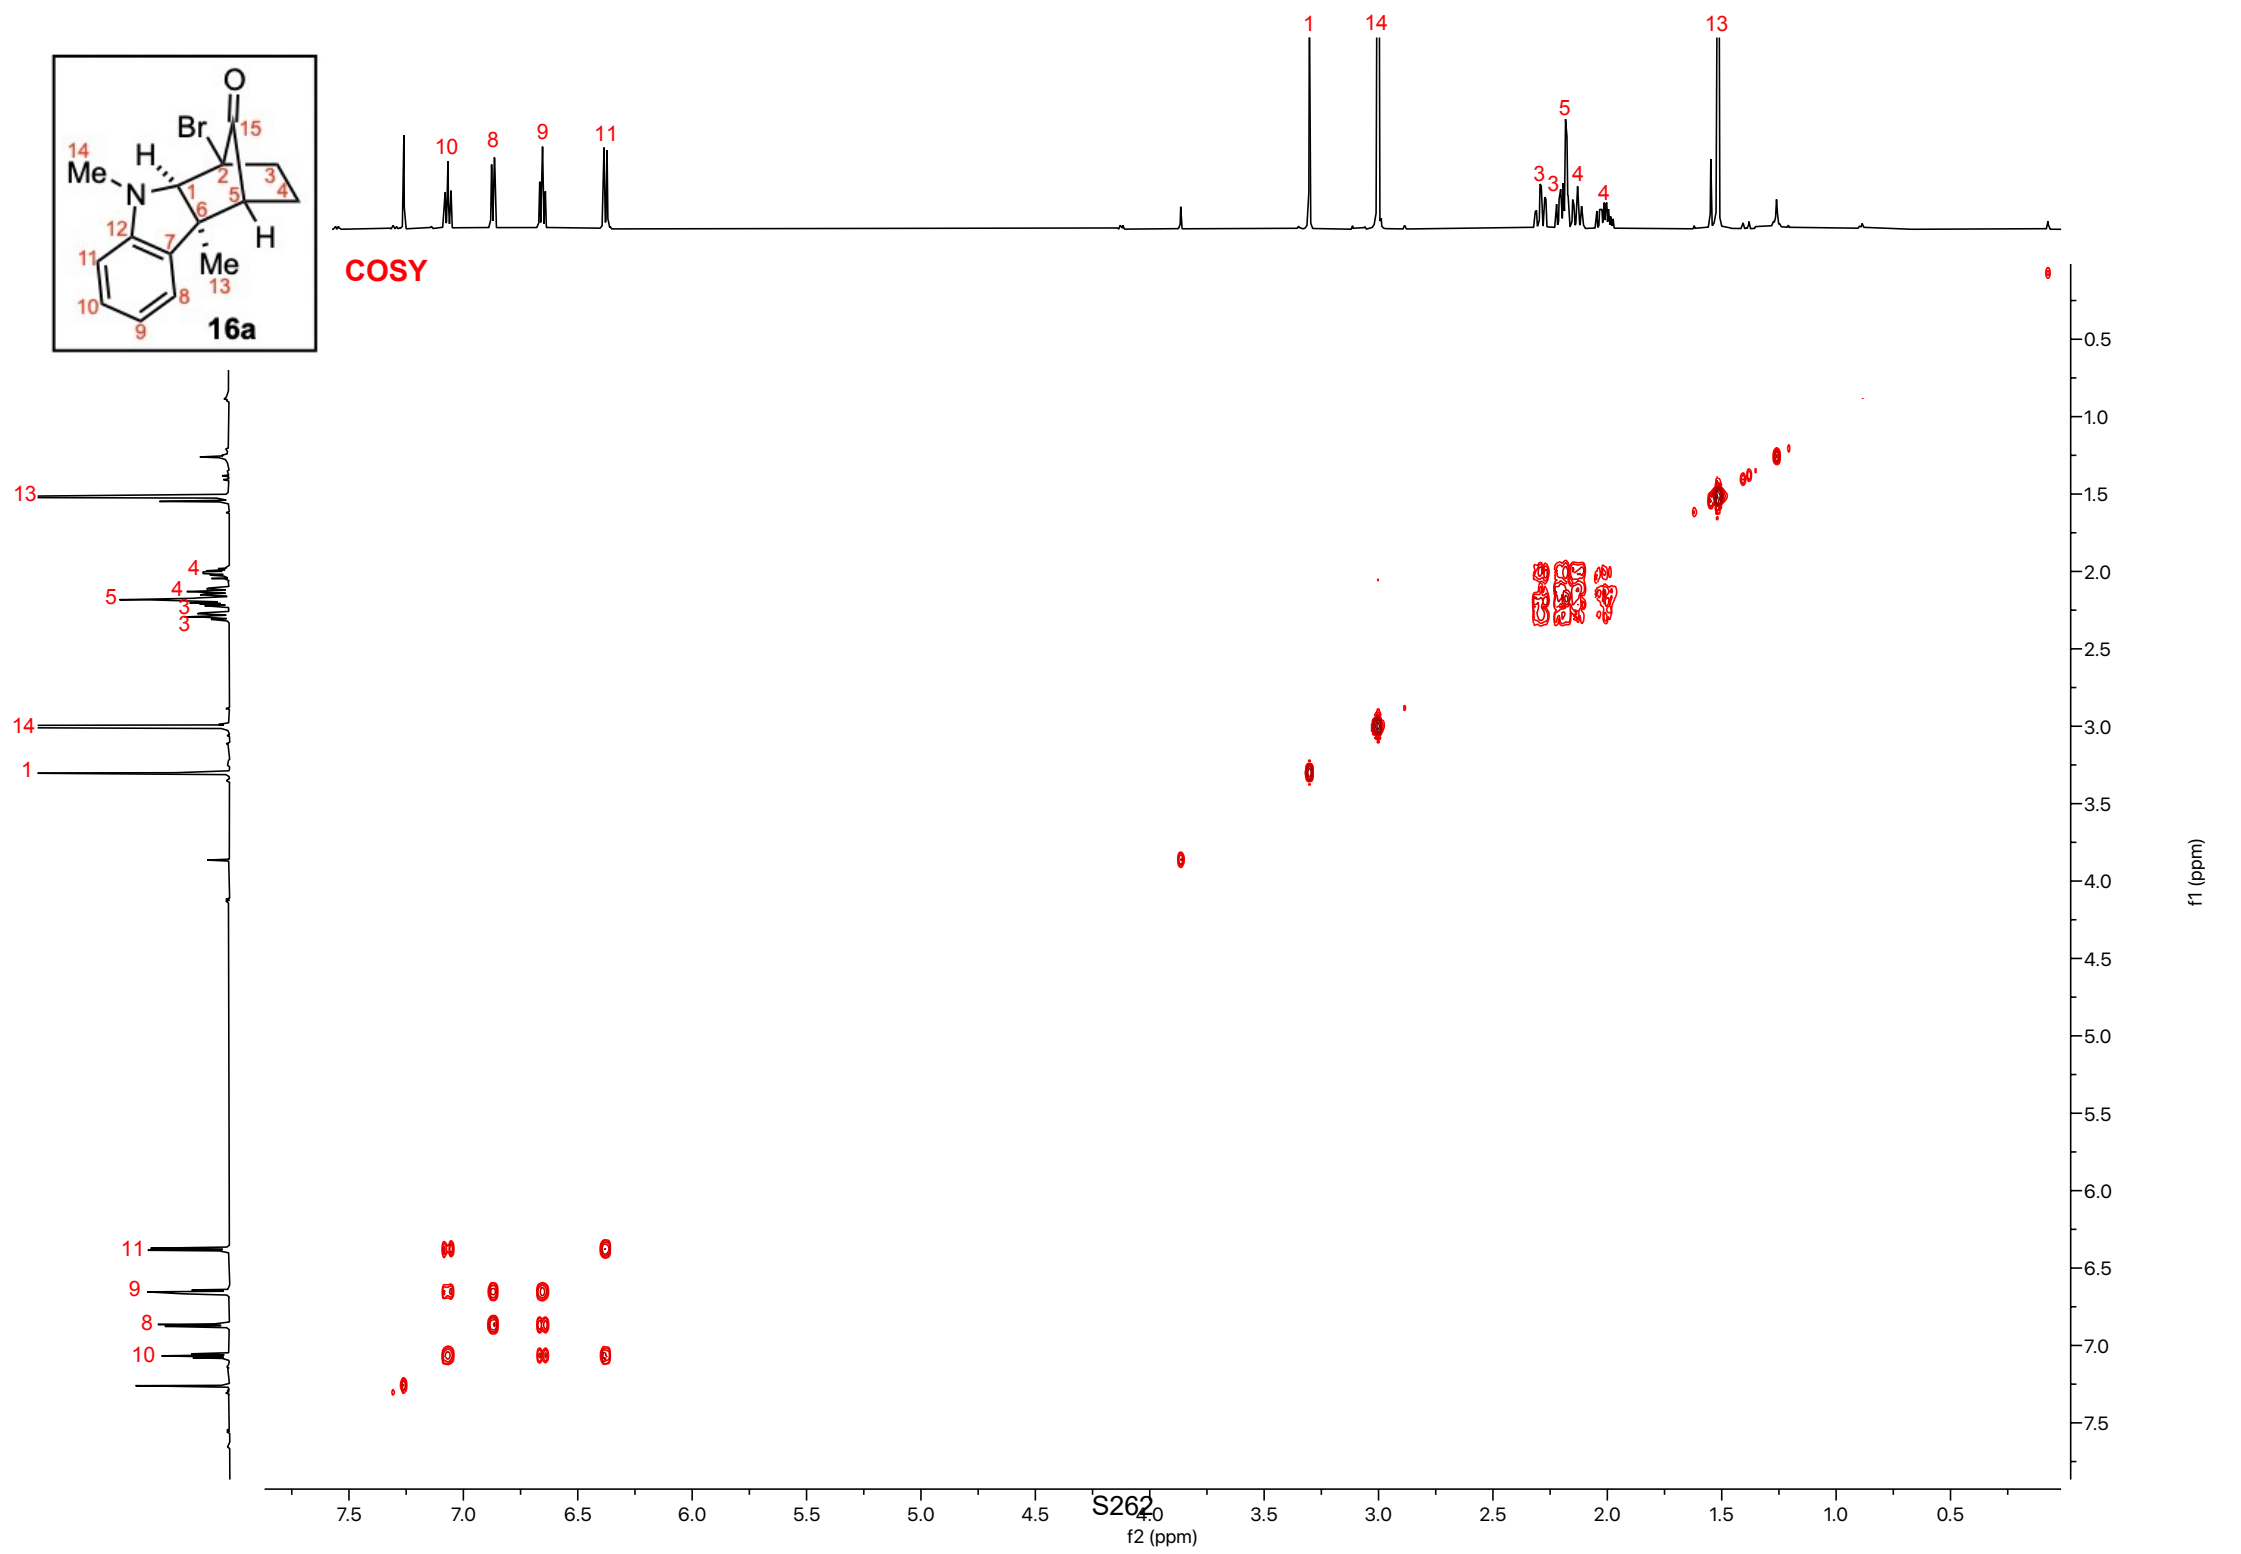



HSQC

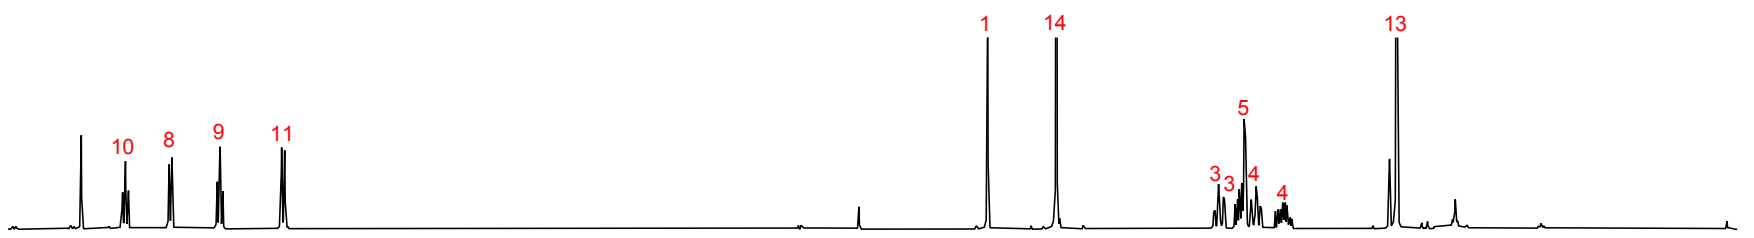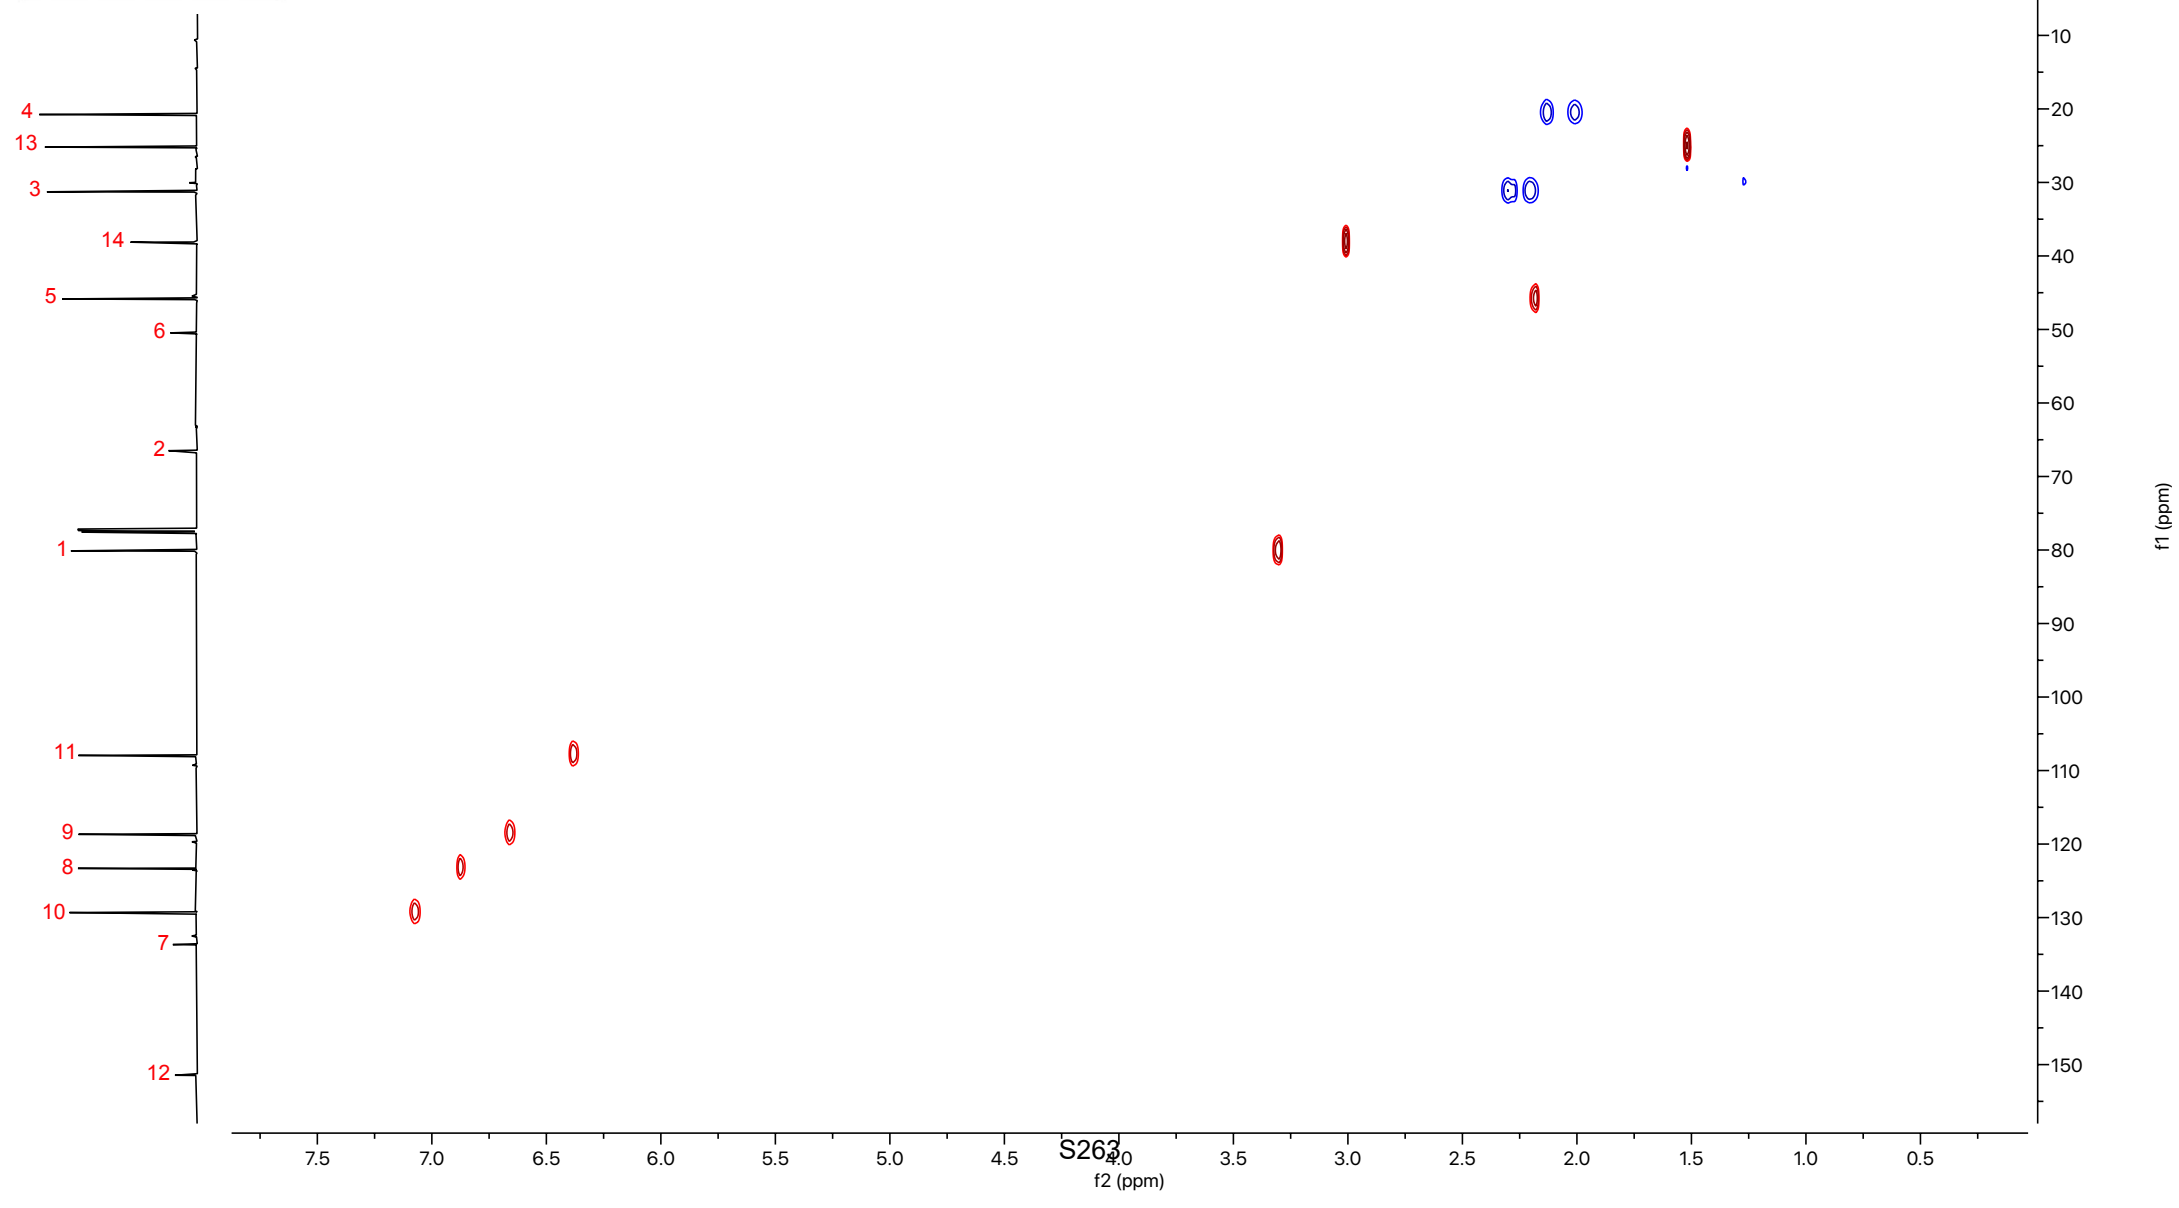





**HMBC**

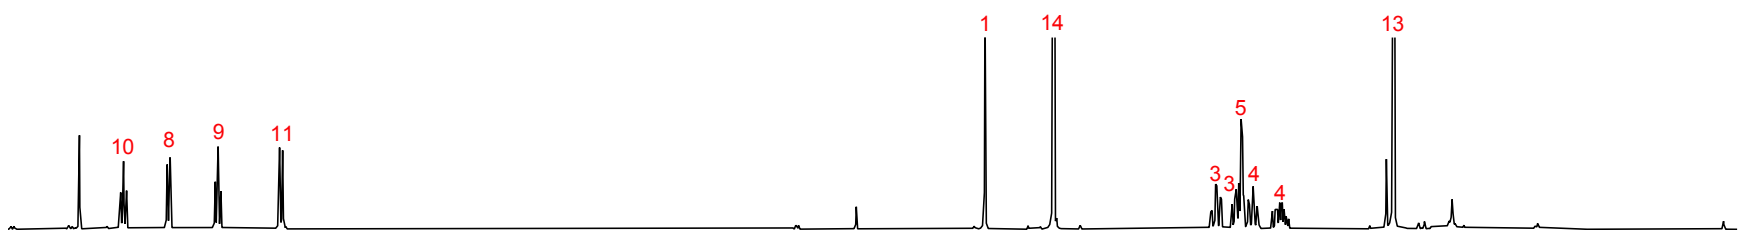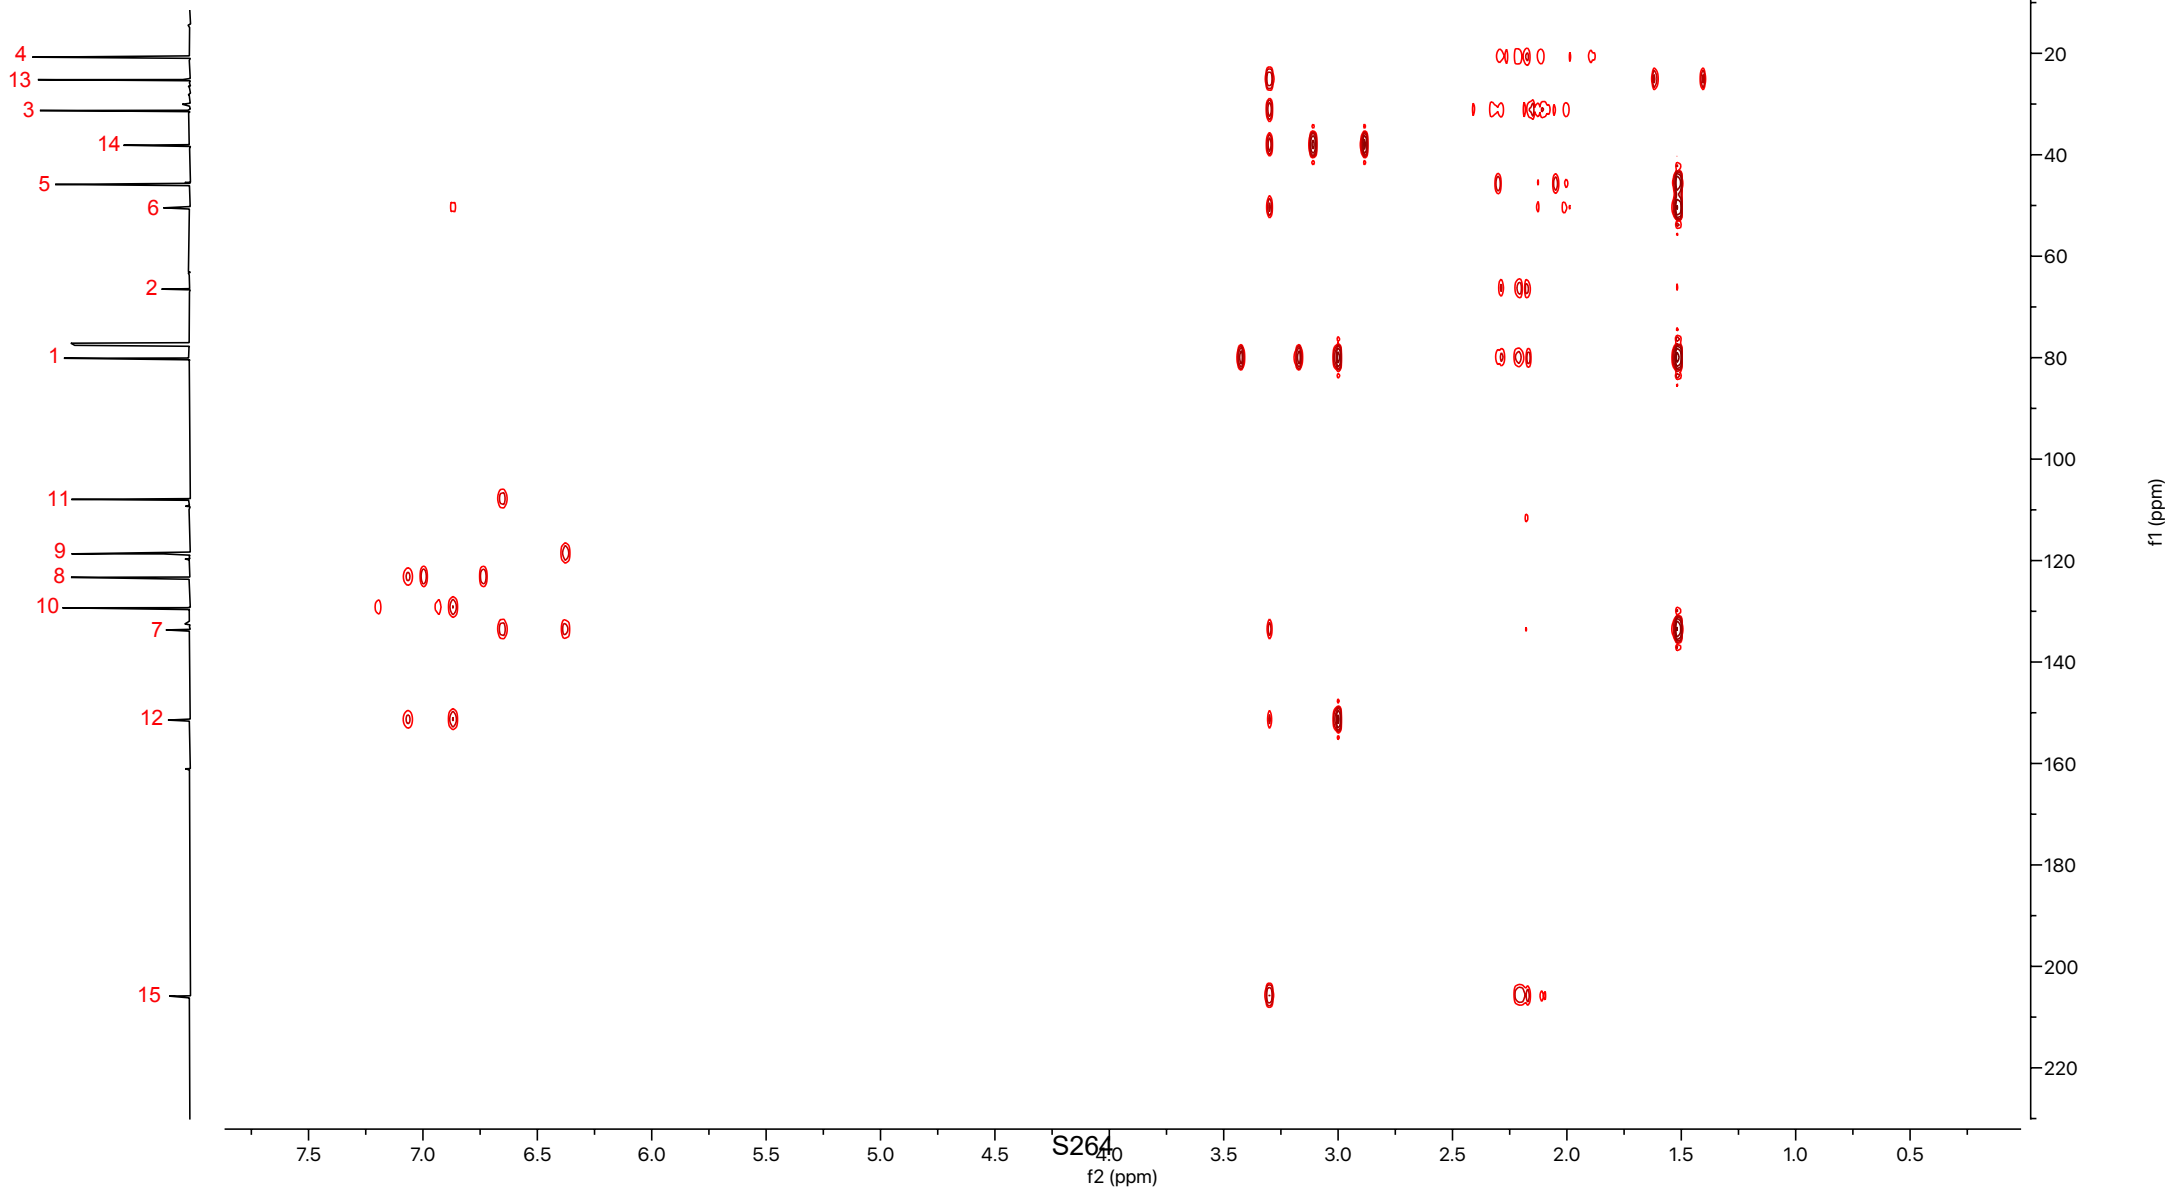

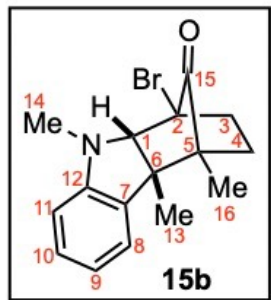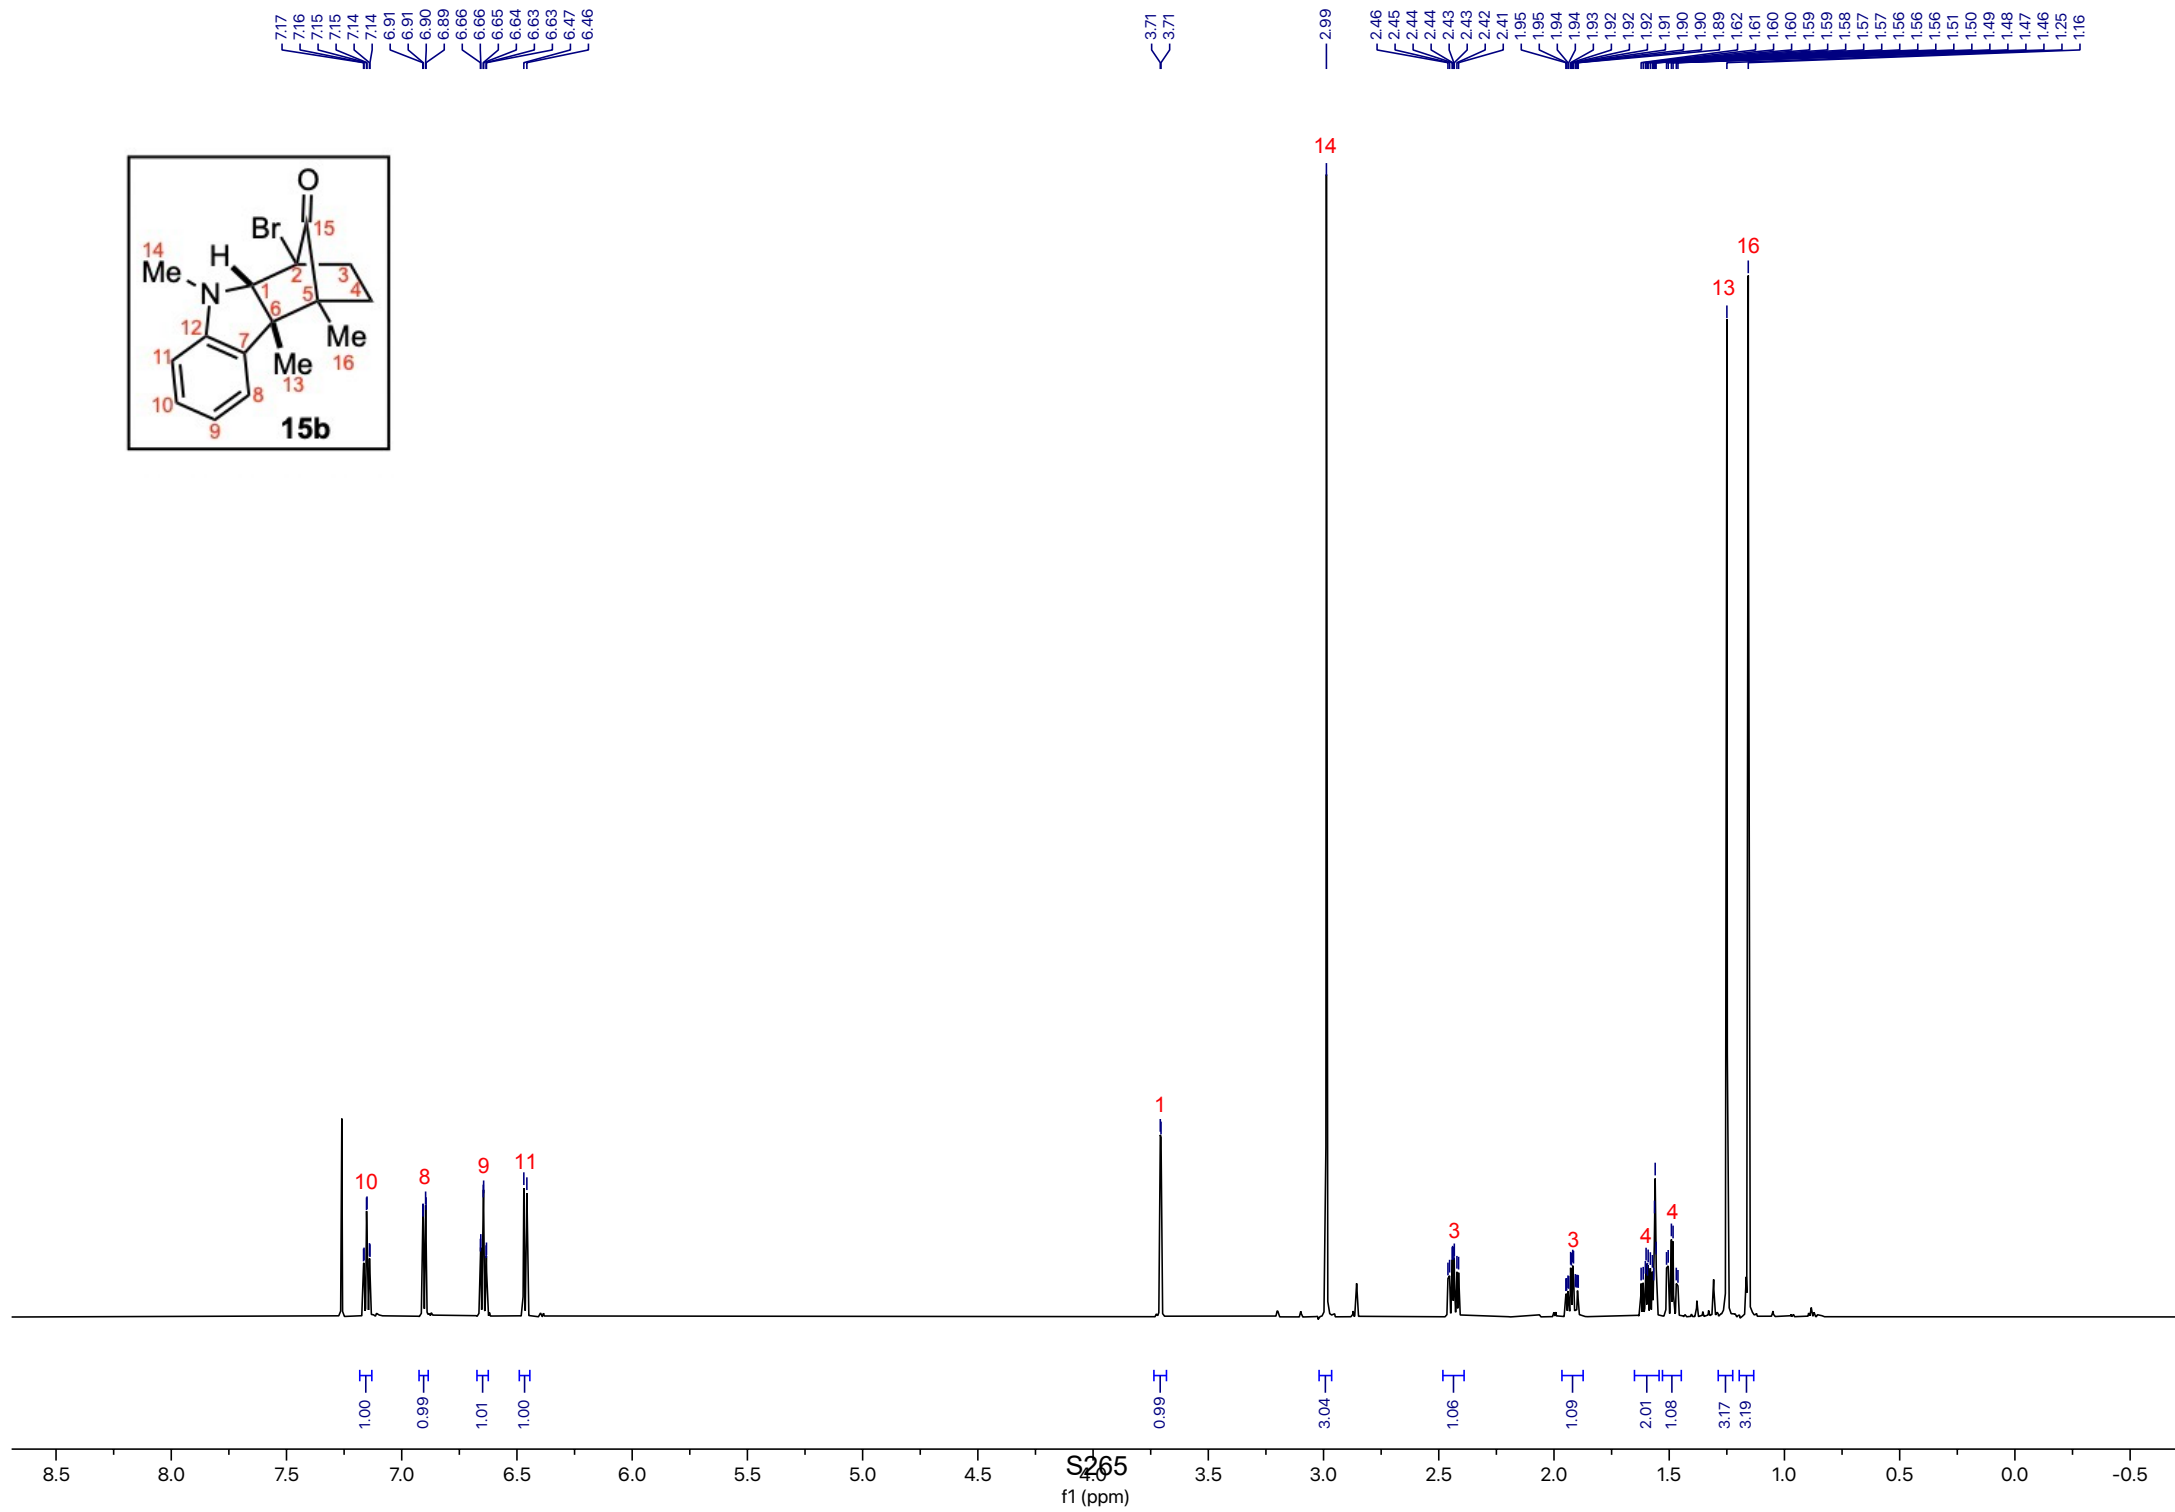

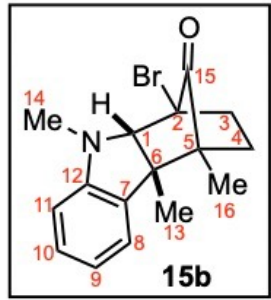

— 208.39

— 153.51

— 130.97

— 129.26

— 123.86

— 117.68

— 106.12

— 79.11

— 63.61

— 52.33

— 45.61

— 34.84

— 29.69

— 27.60

— 26.13

— 11.97

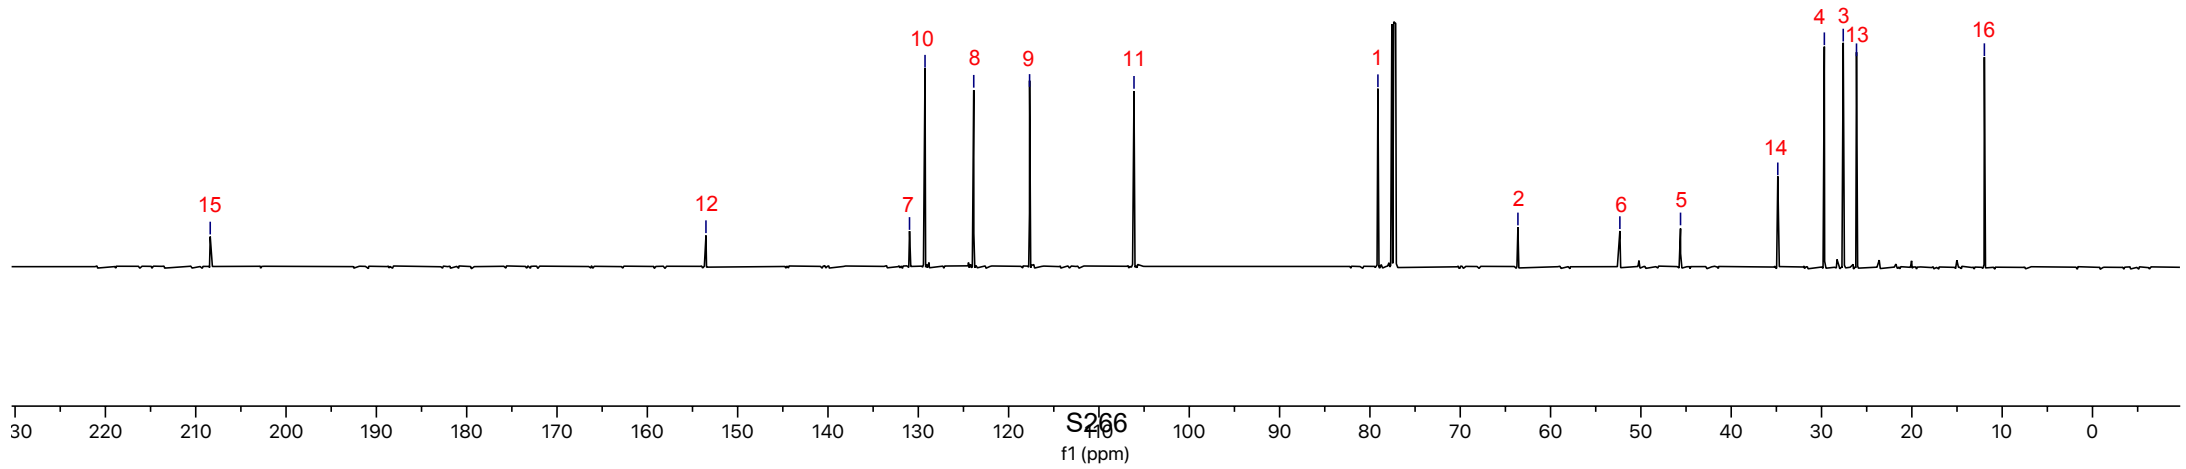

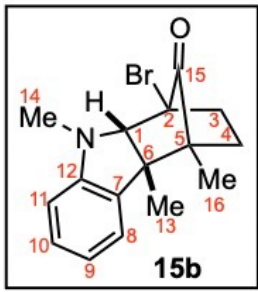

**COSY**

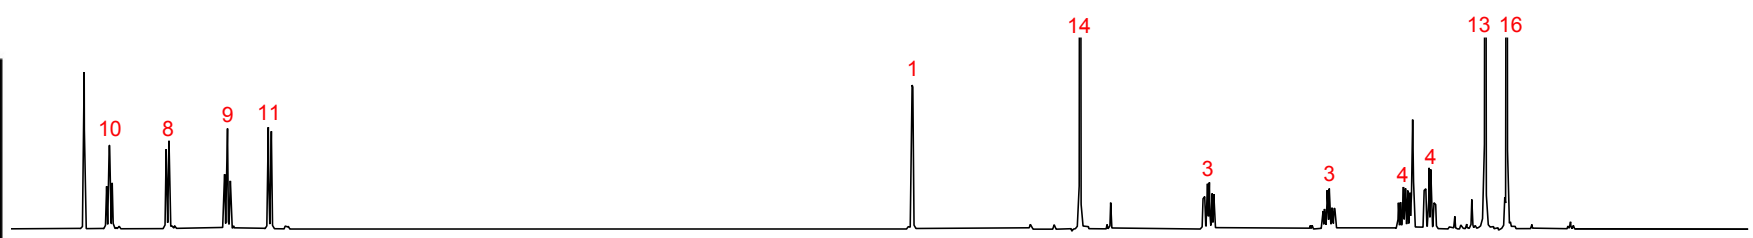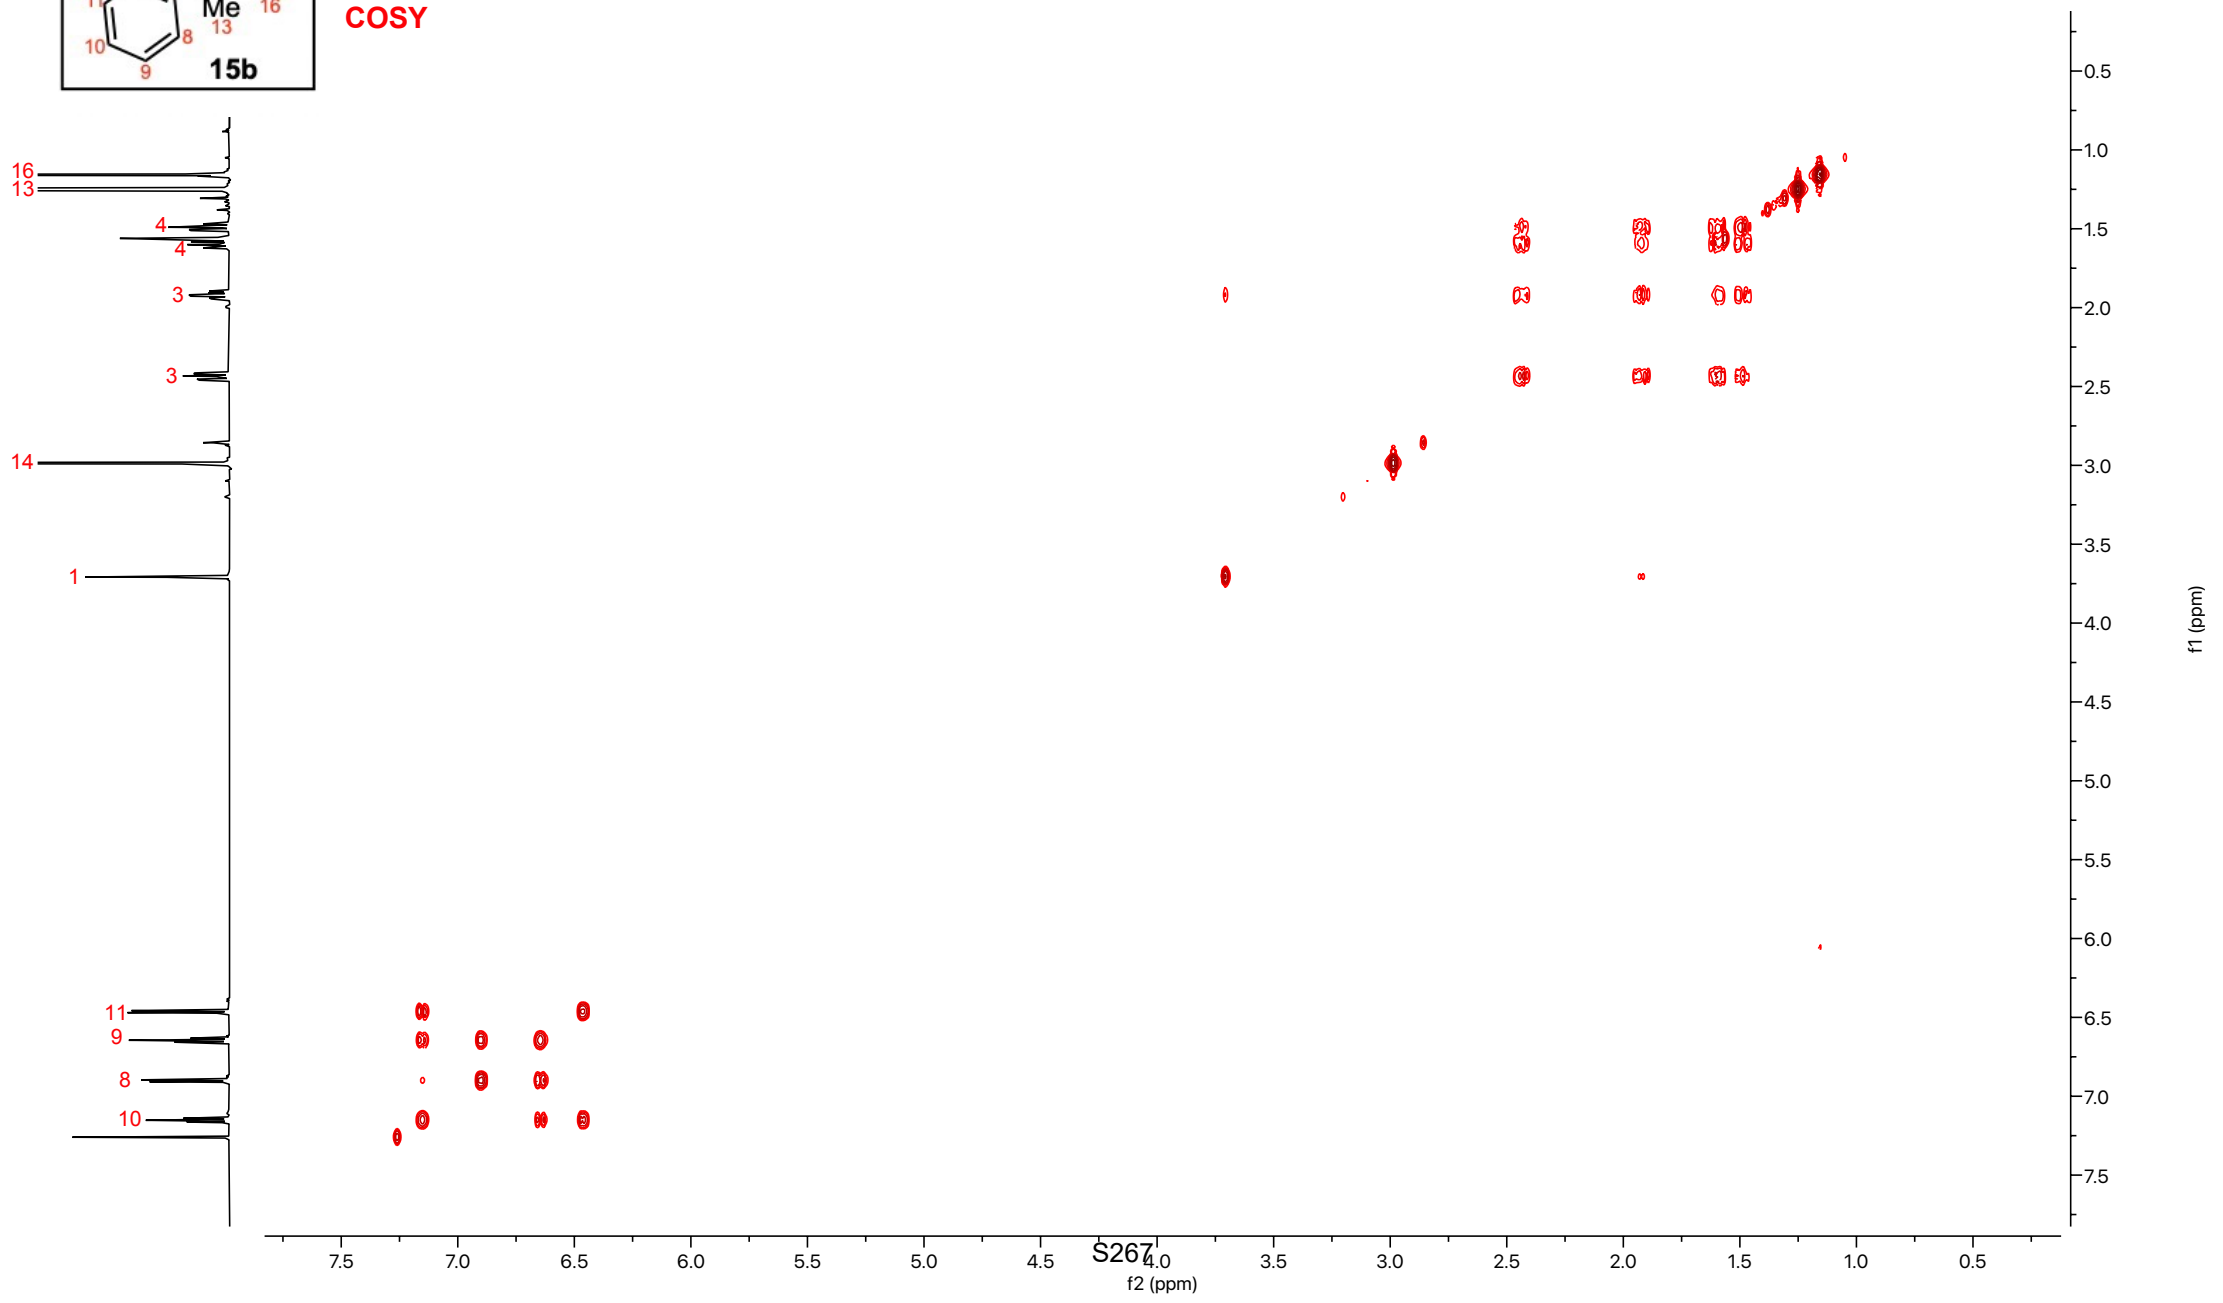

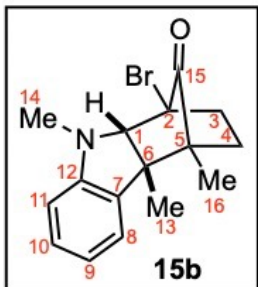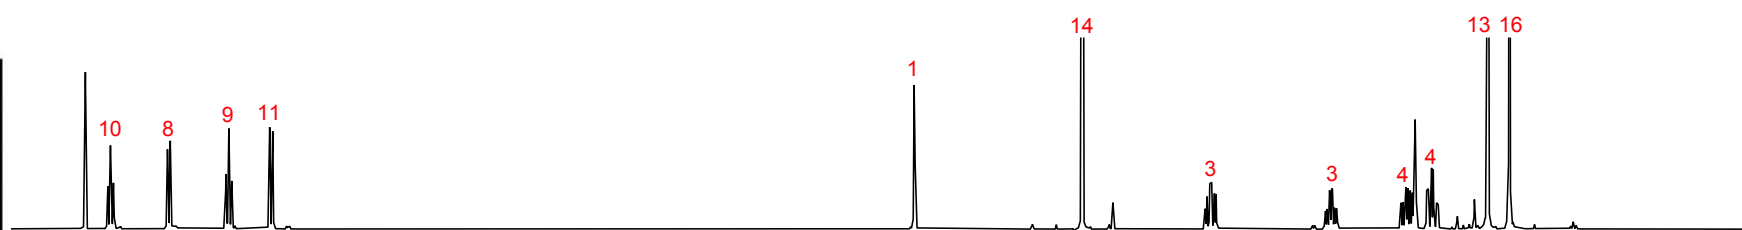

**HSQC**

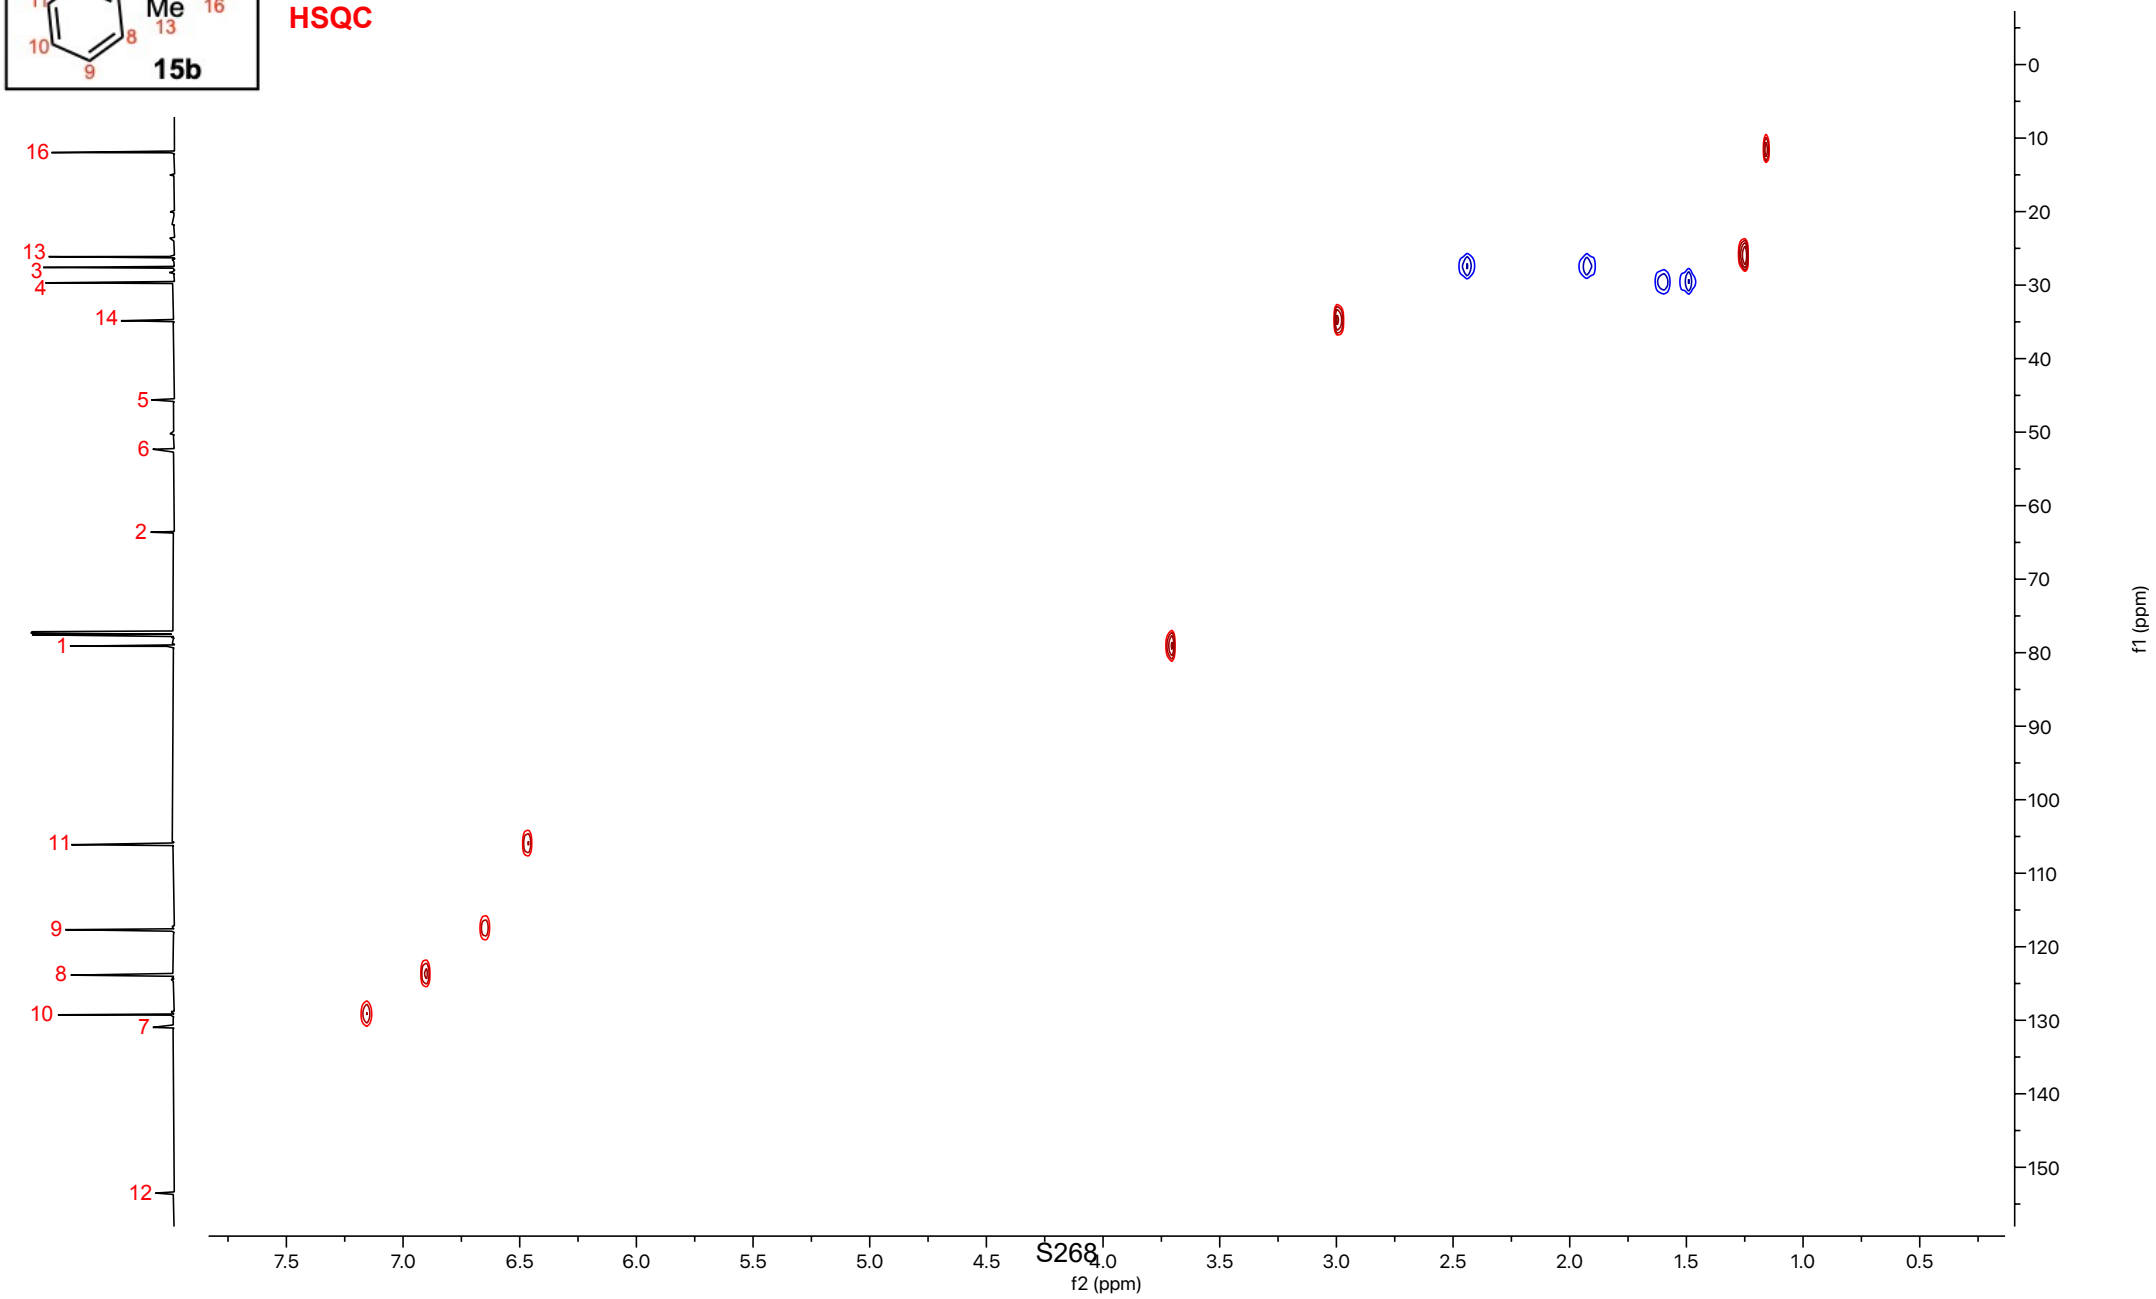

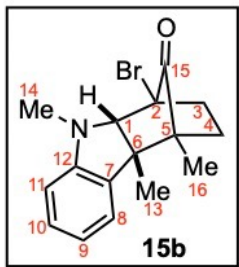

**HMBC**

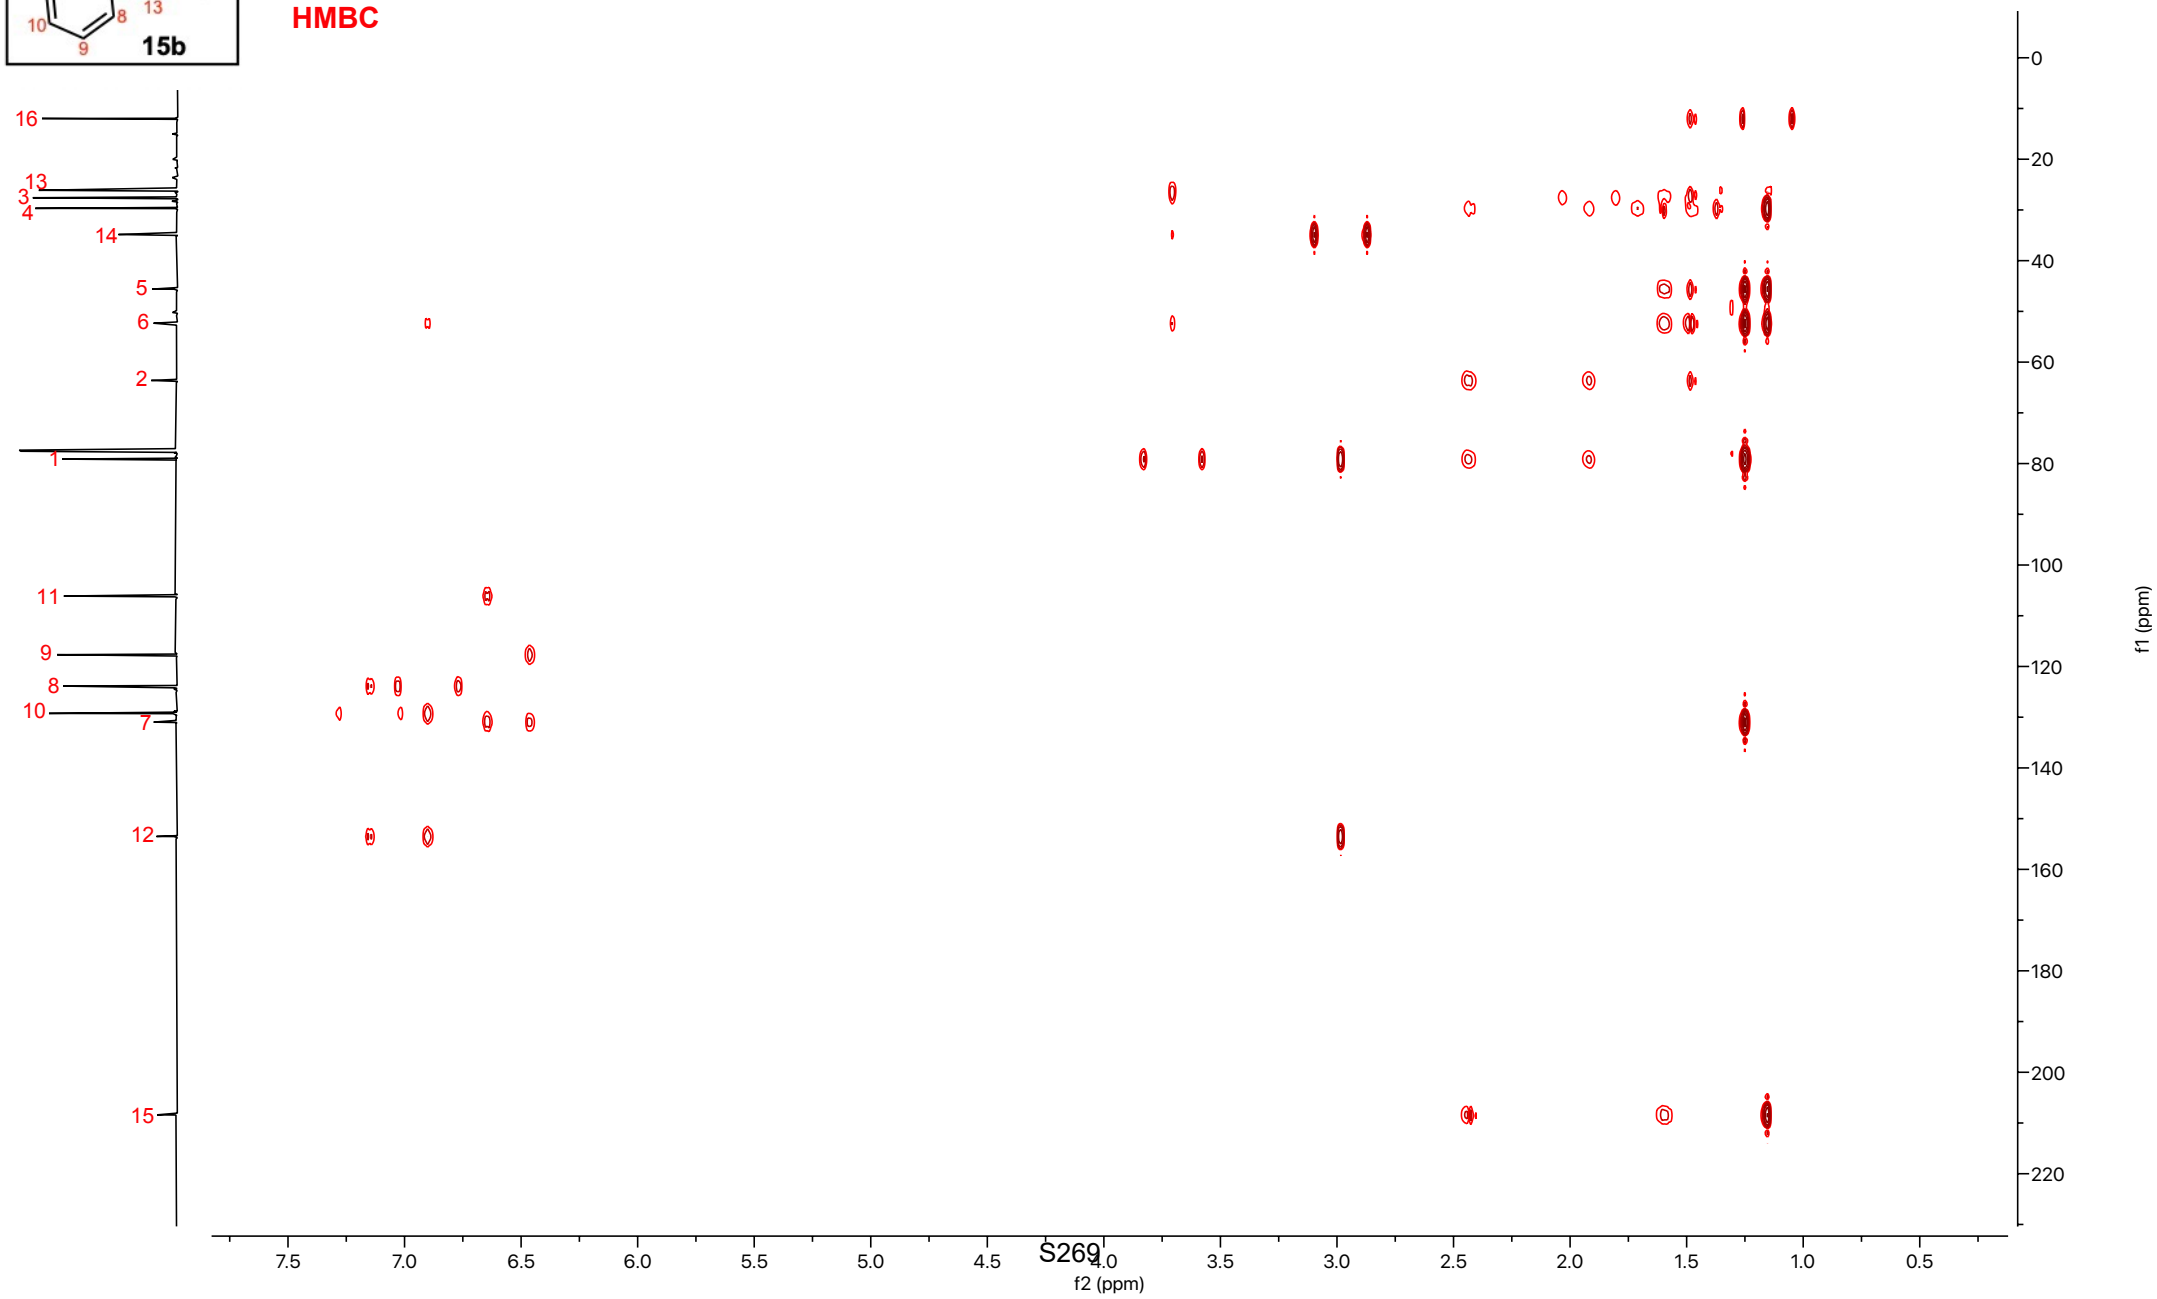



**NOESY**

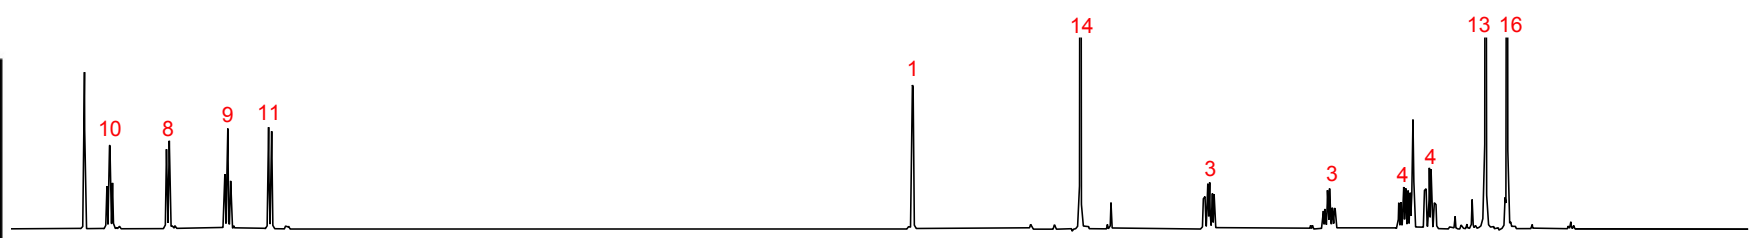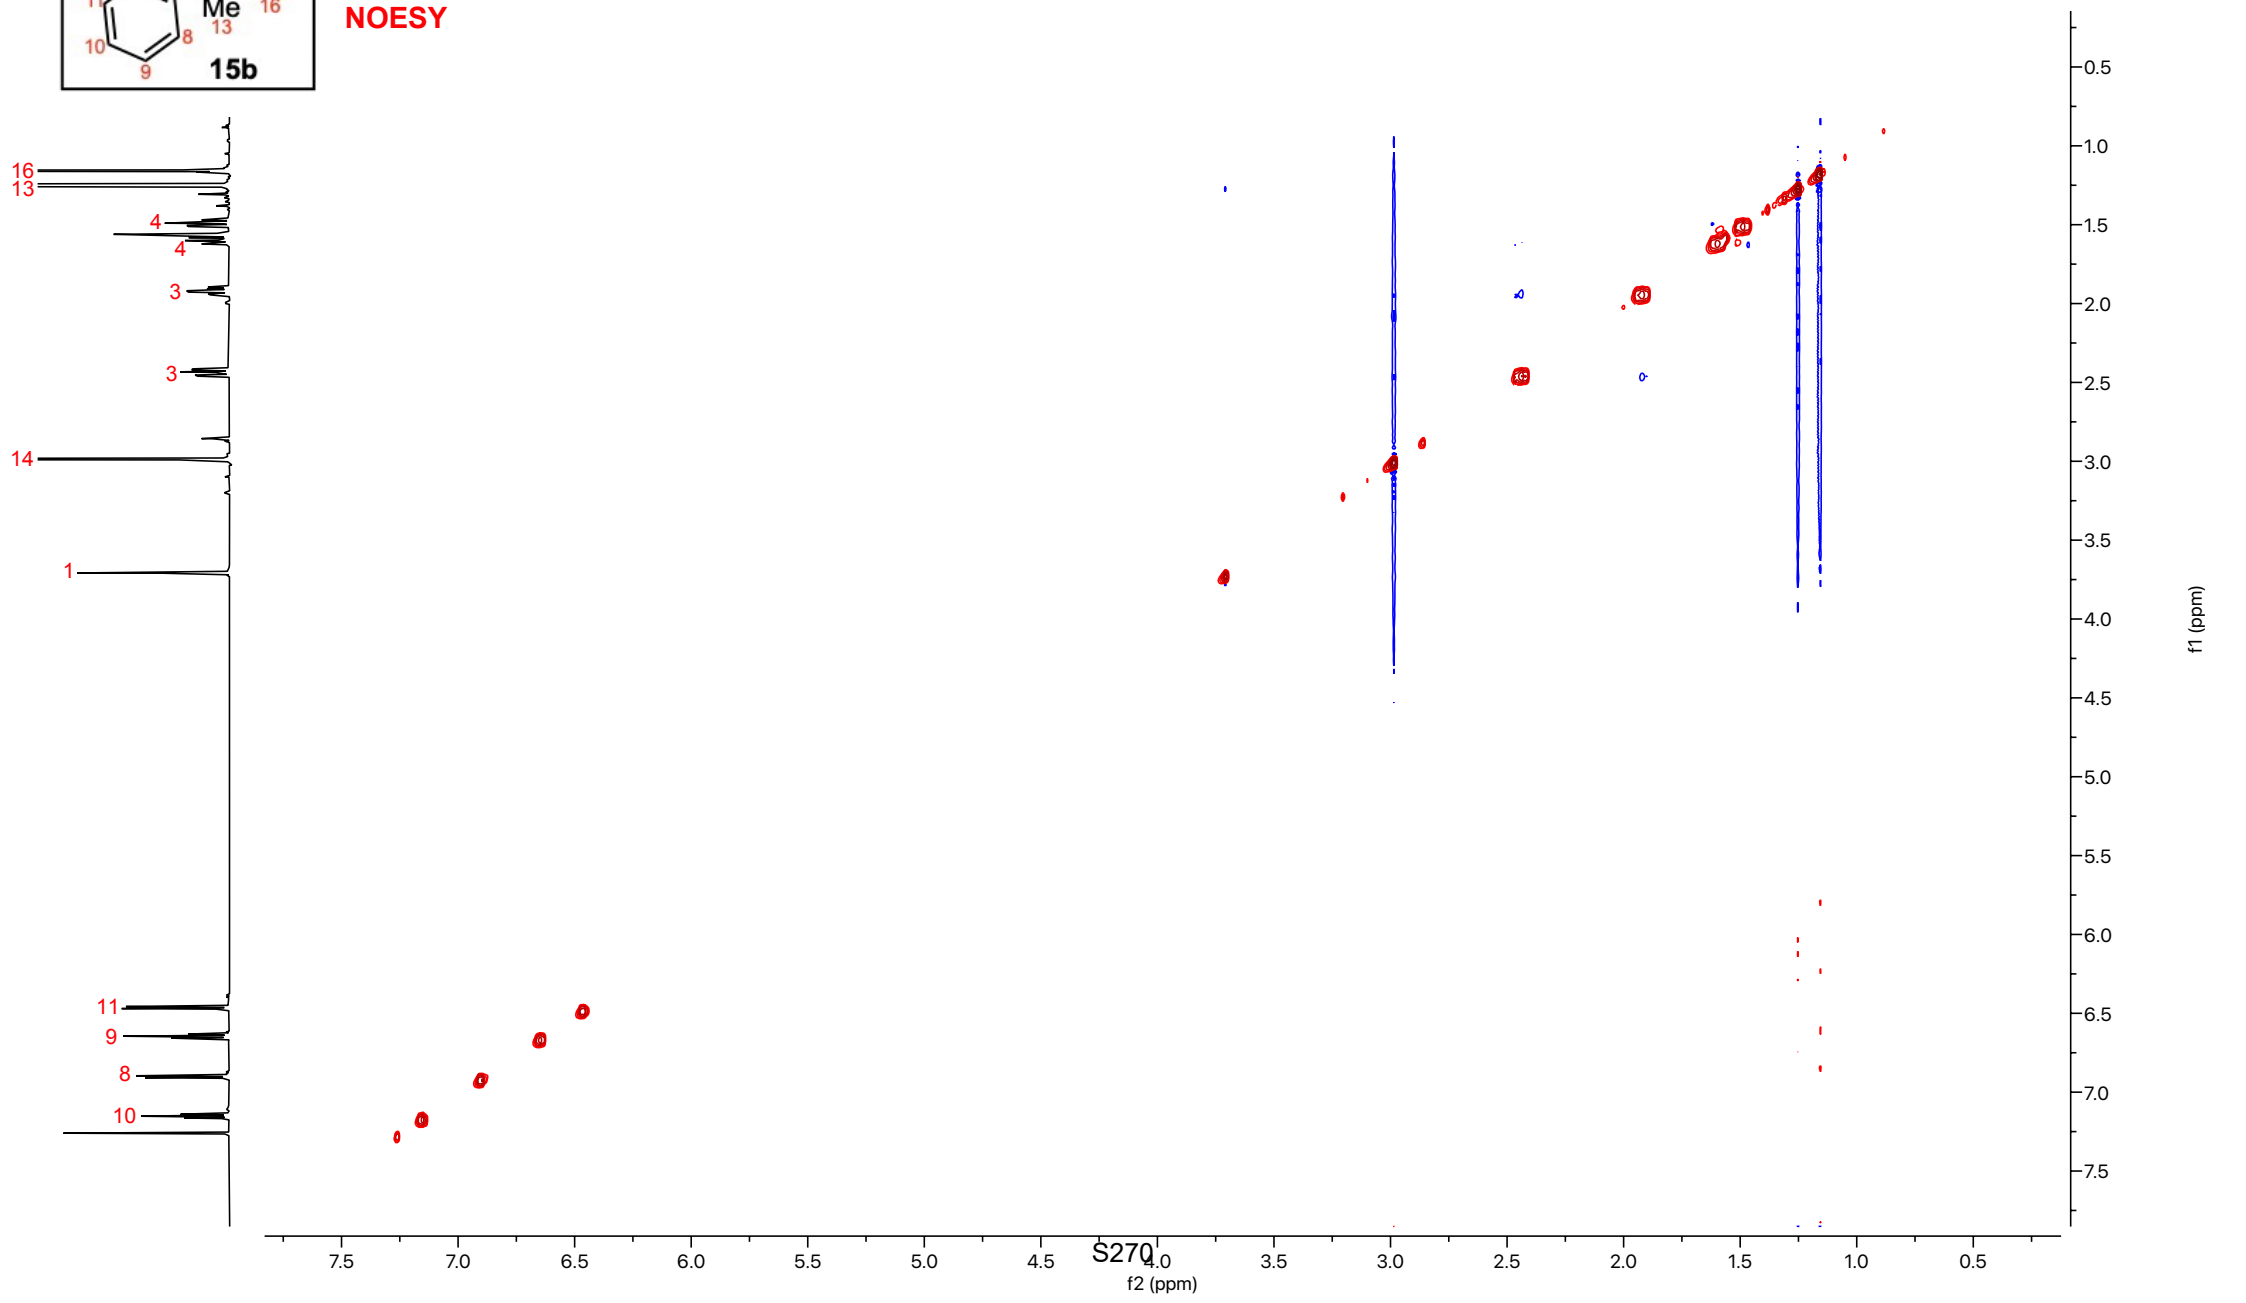

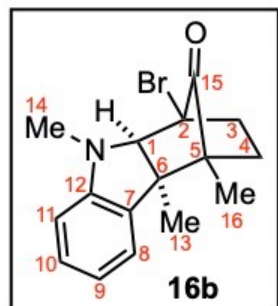

7.08  
7.07  
7.06  
7.05  
6.87  
6.86  
6.86  
6.84  
6.84  
6.63  
6.63  
6.62  
6.61  
6.39  
6.38

3.35  
2.97  
2.33  
2.32  
2.31  
2.30  
2.29  
2.27  
2.25  
2.24  
2.23  
2.23  
2.22  
2.21  
2.20  
2.19  
2.18  
2.17  
2.17  
1.76  
1.74  
1.74  
1.73  
1.72  
1.71  
1.70  
1.69  
1.50  
1.11

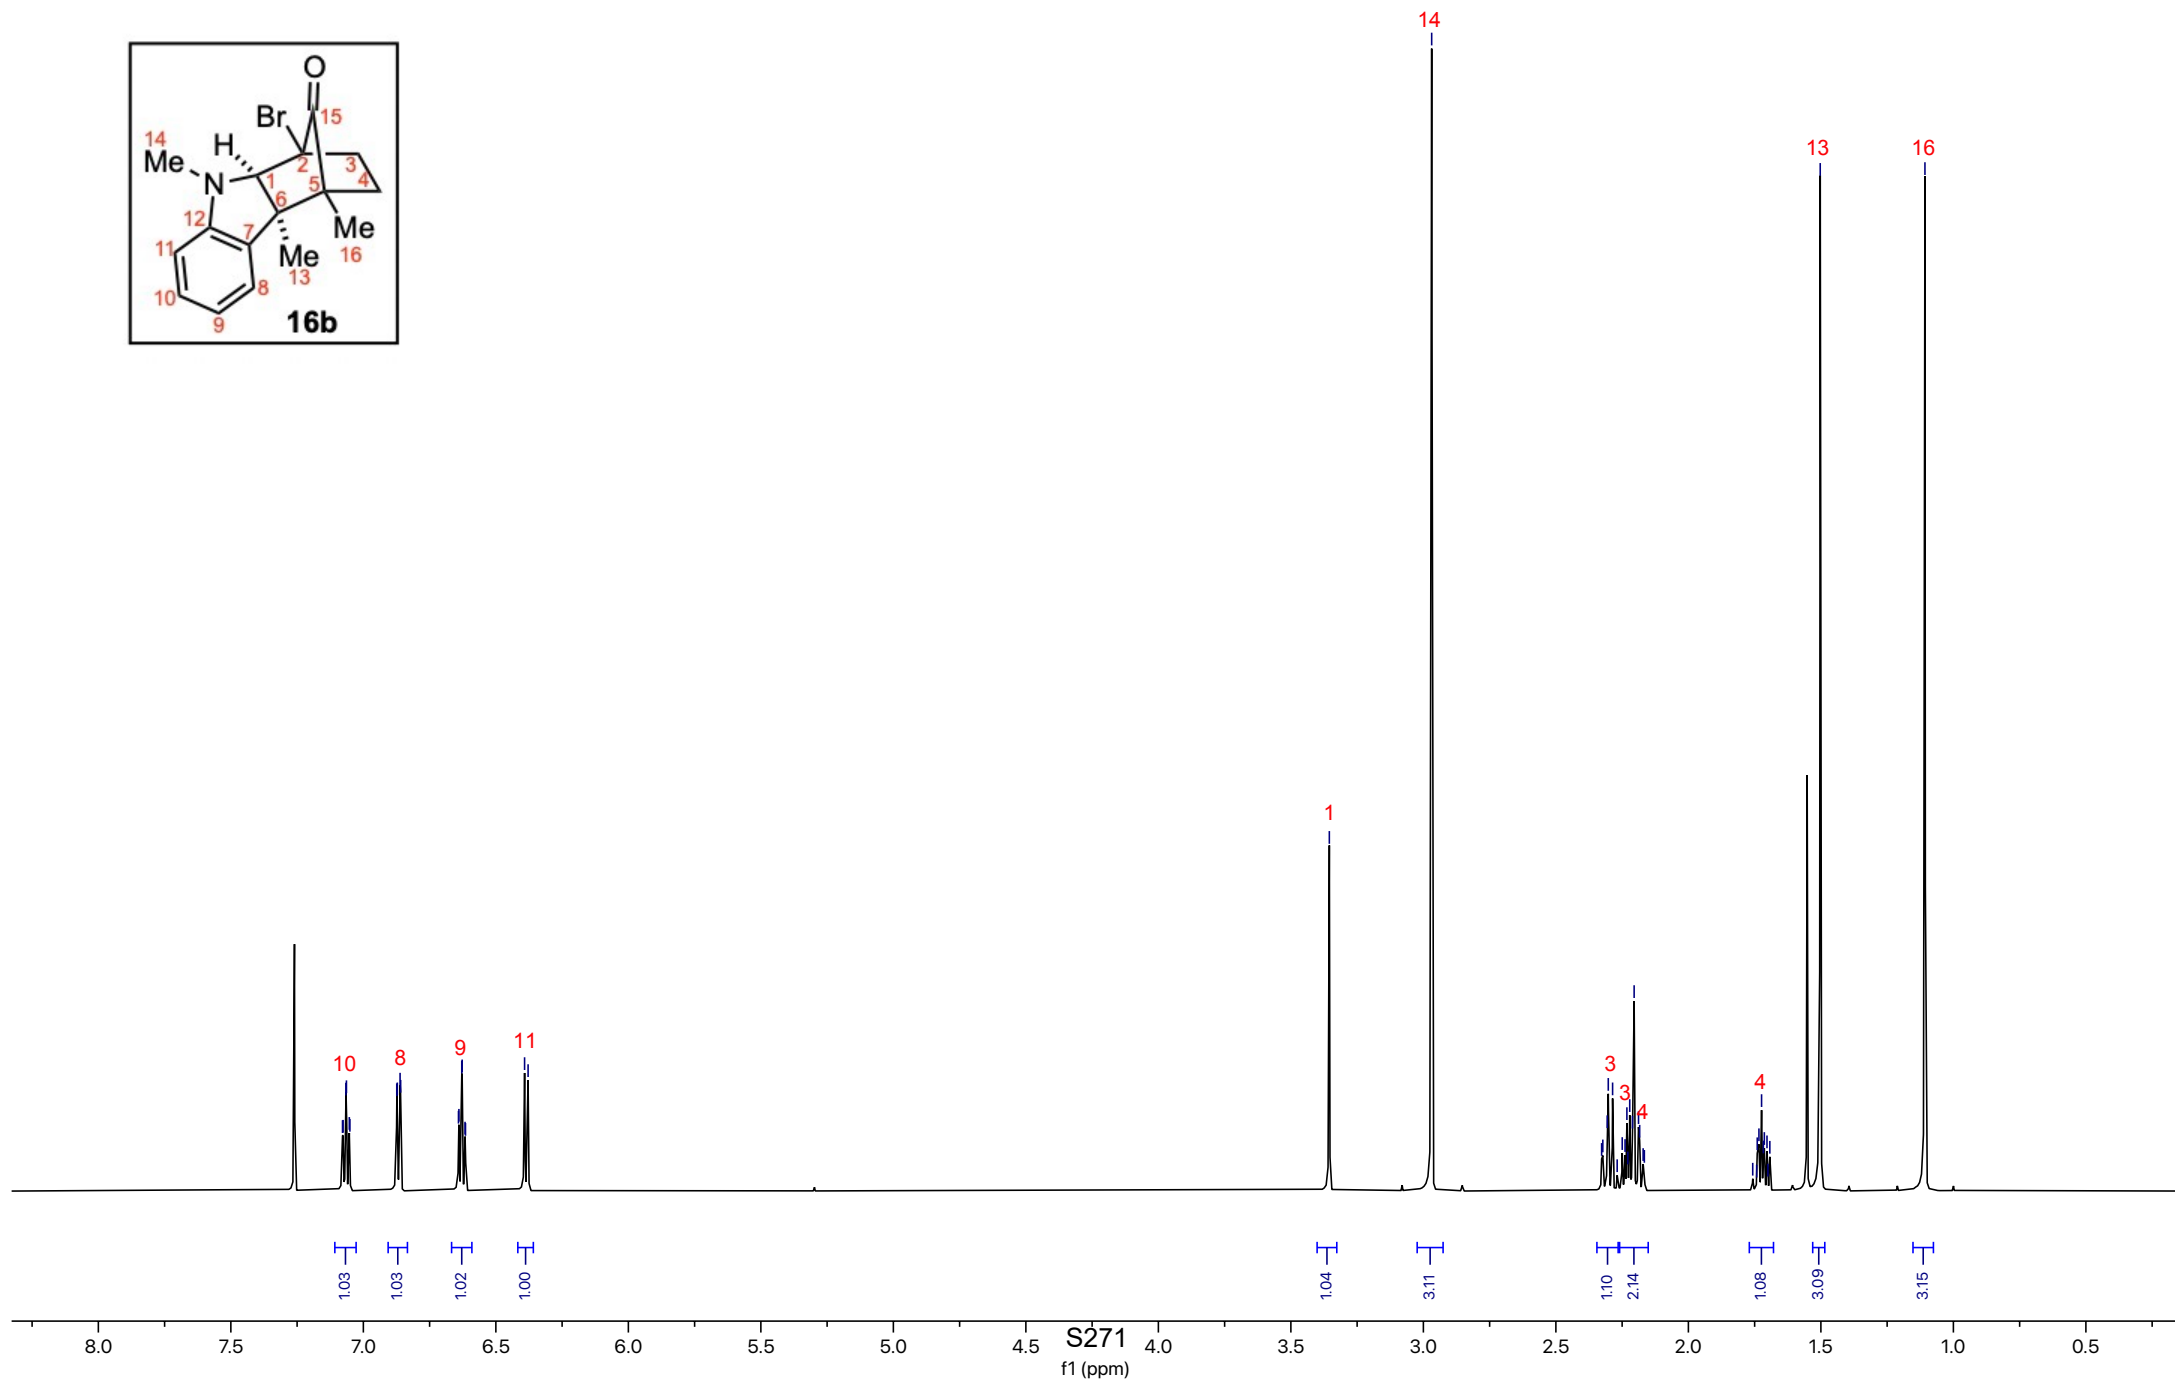



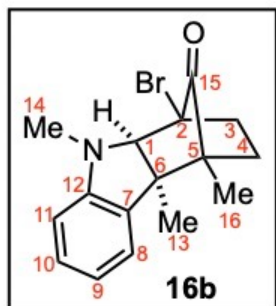

— 207.94

— 152.41

— 132.02  
— 129.12  
— 125.19

— 118.11

— 108.28

— 80.57

— 66.37

— 52.59

— 45.05

— 38.99

— 31.21

— 28.43

— 24.03

— 12.07

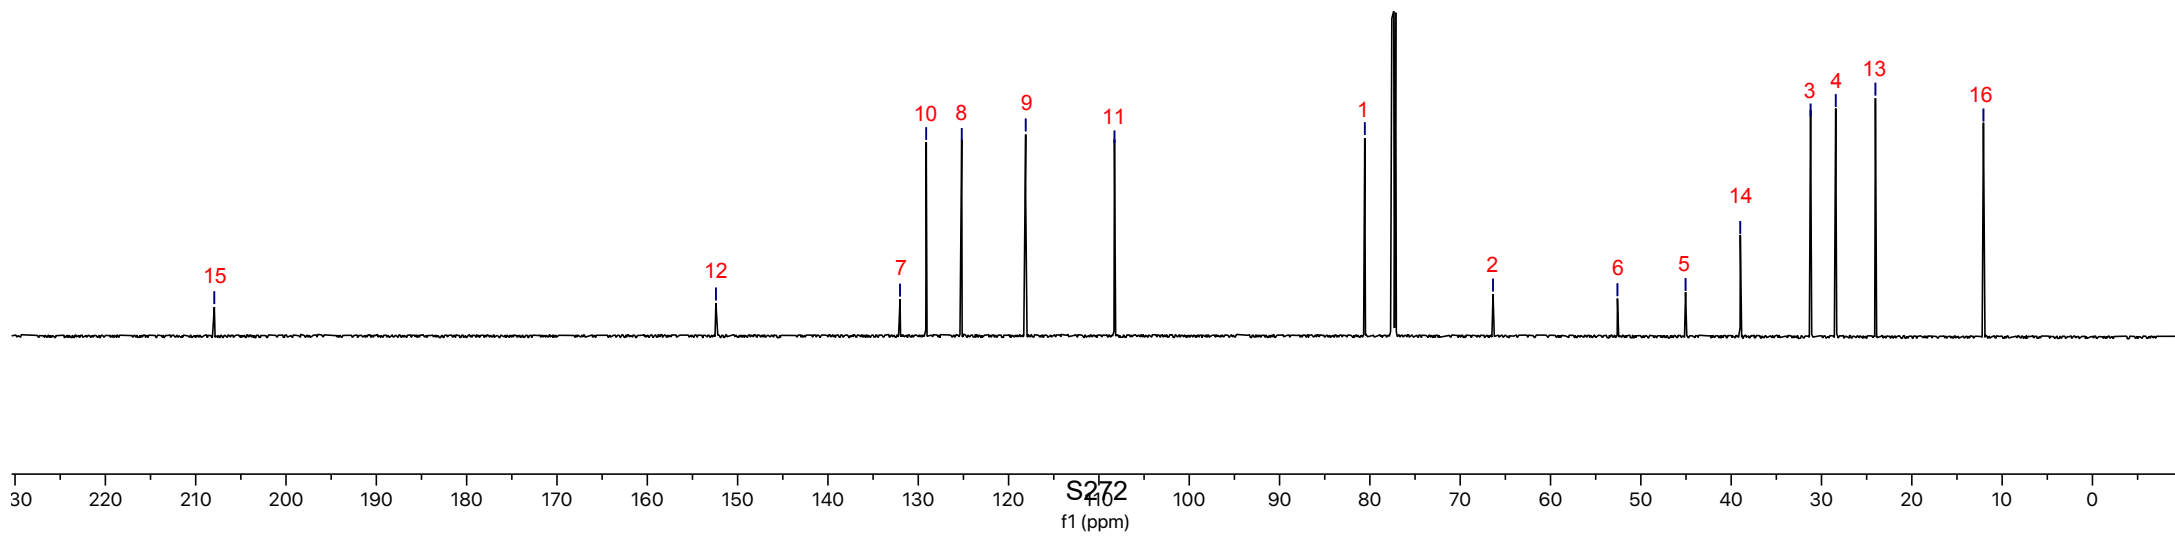

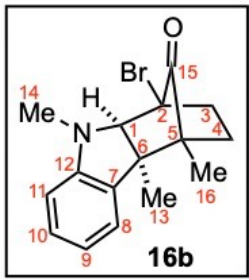

**COSY**

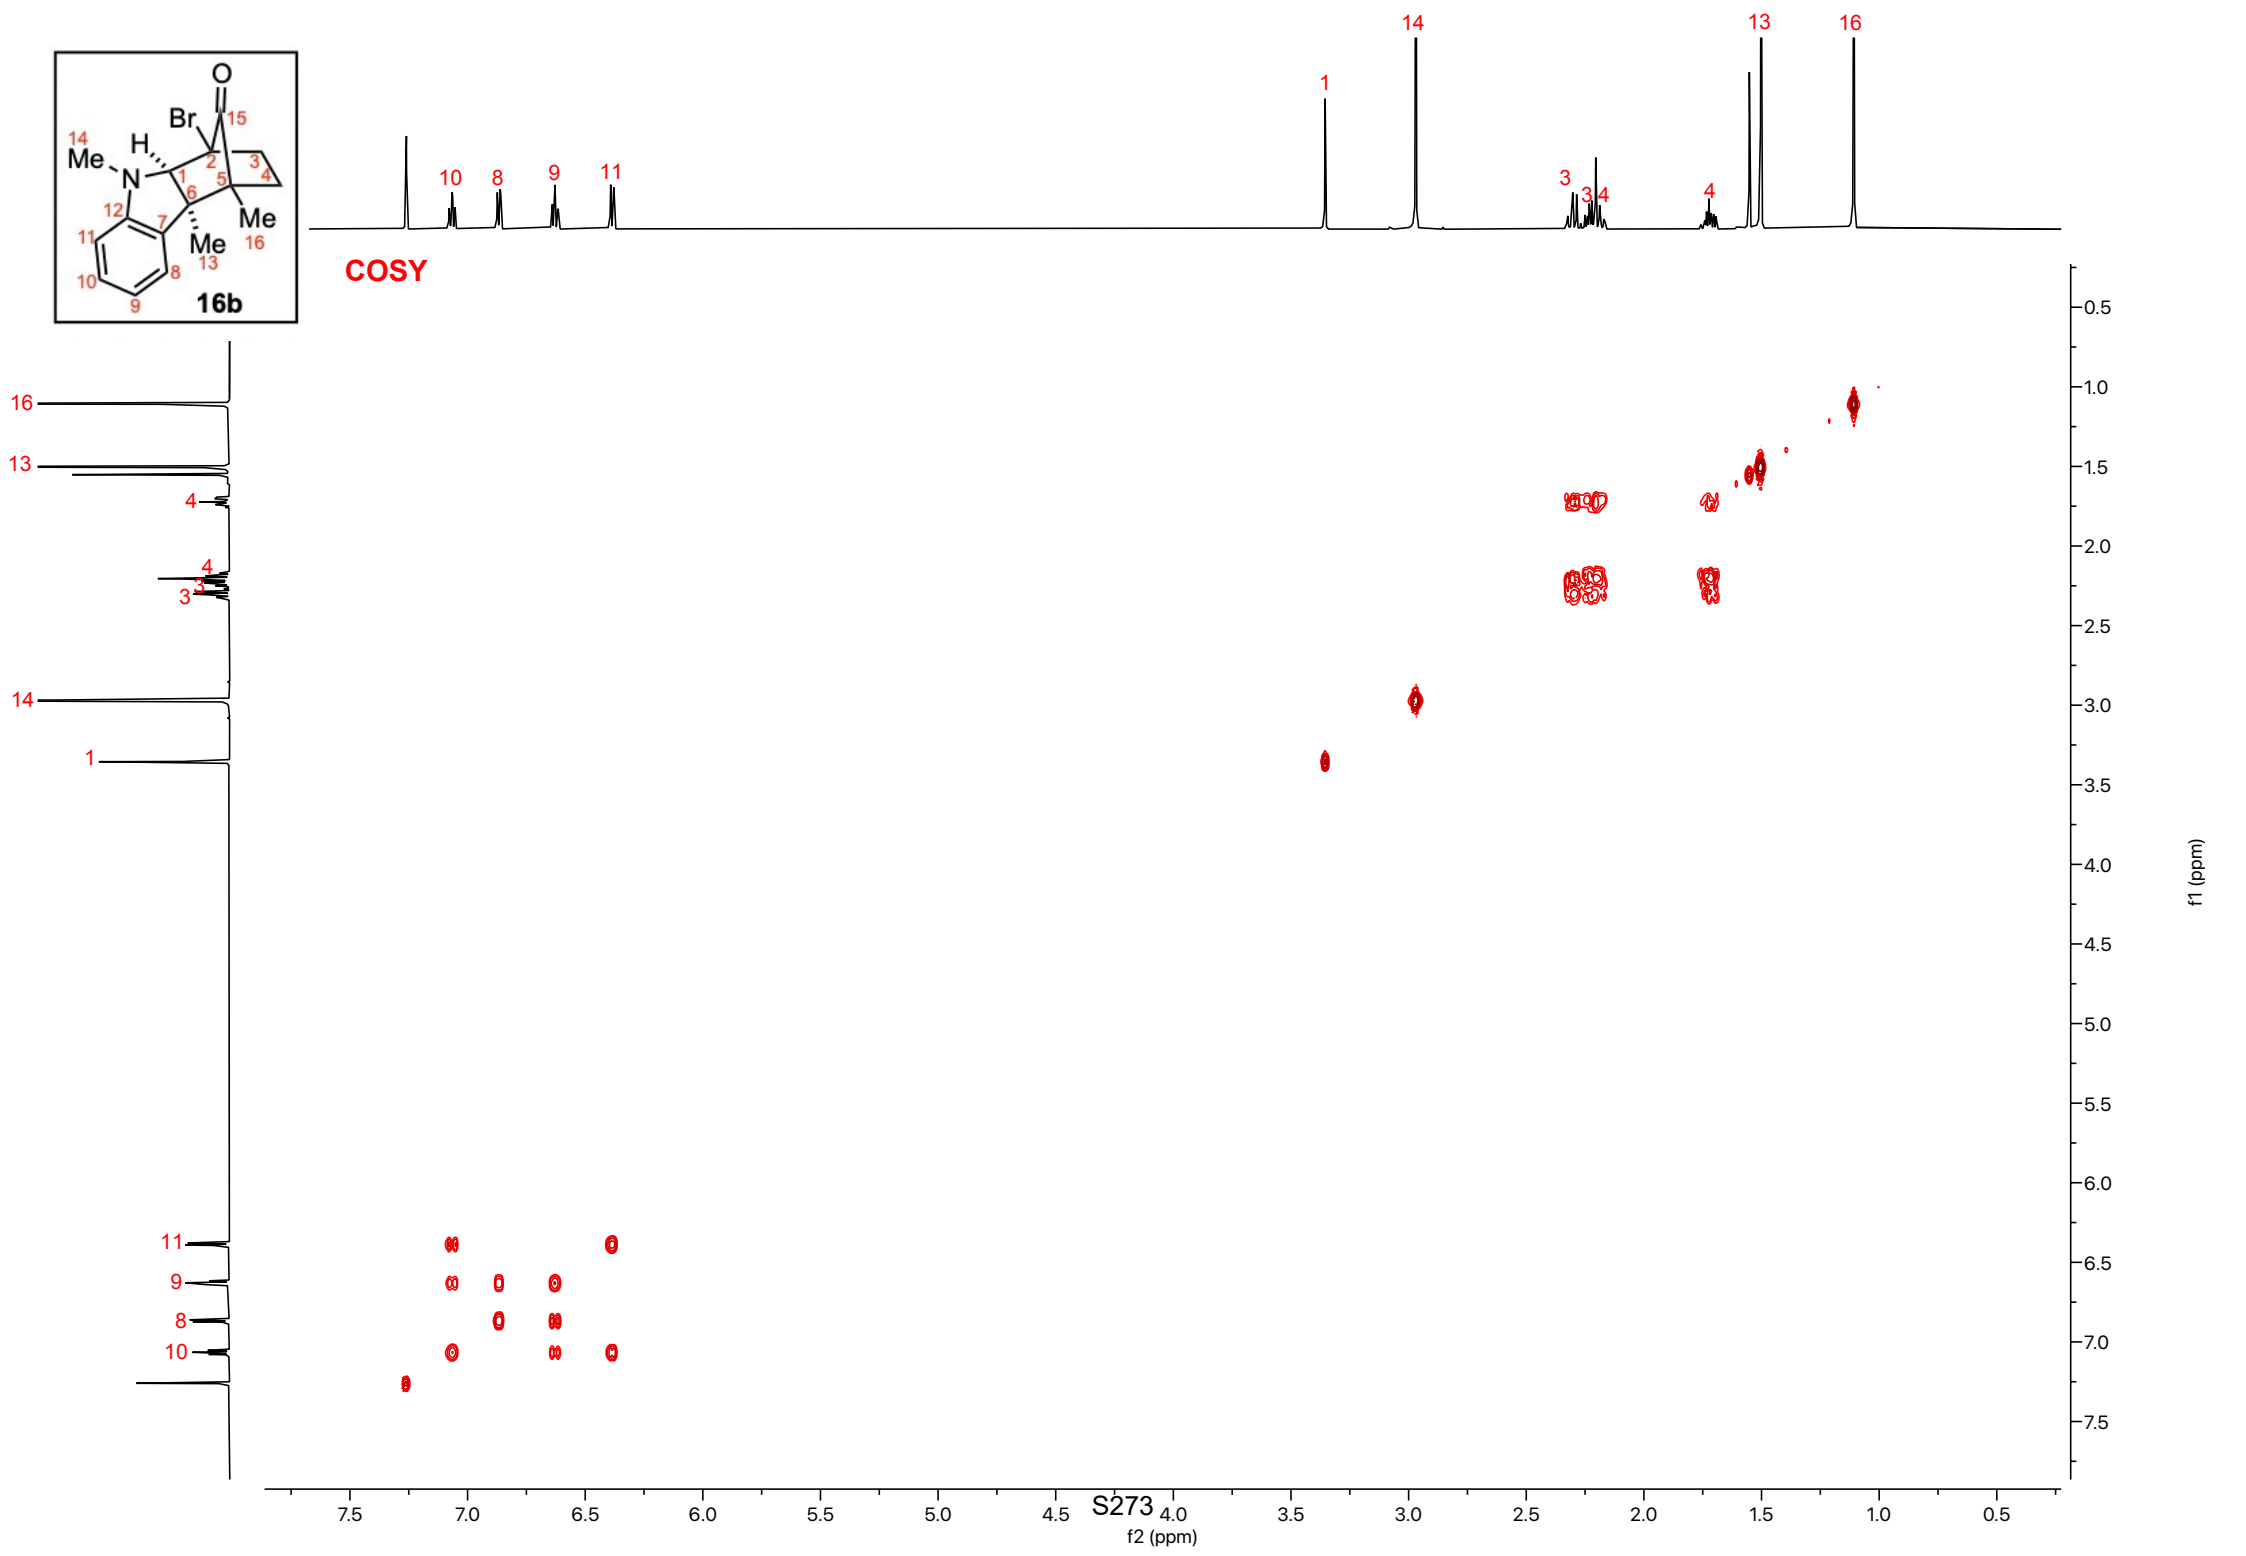

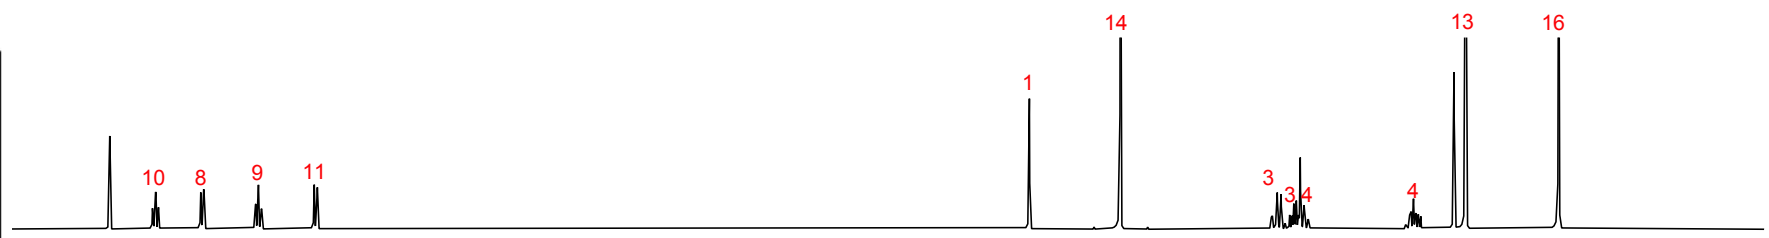

**HSQC**

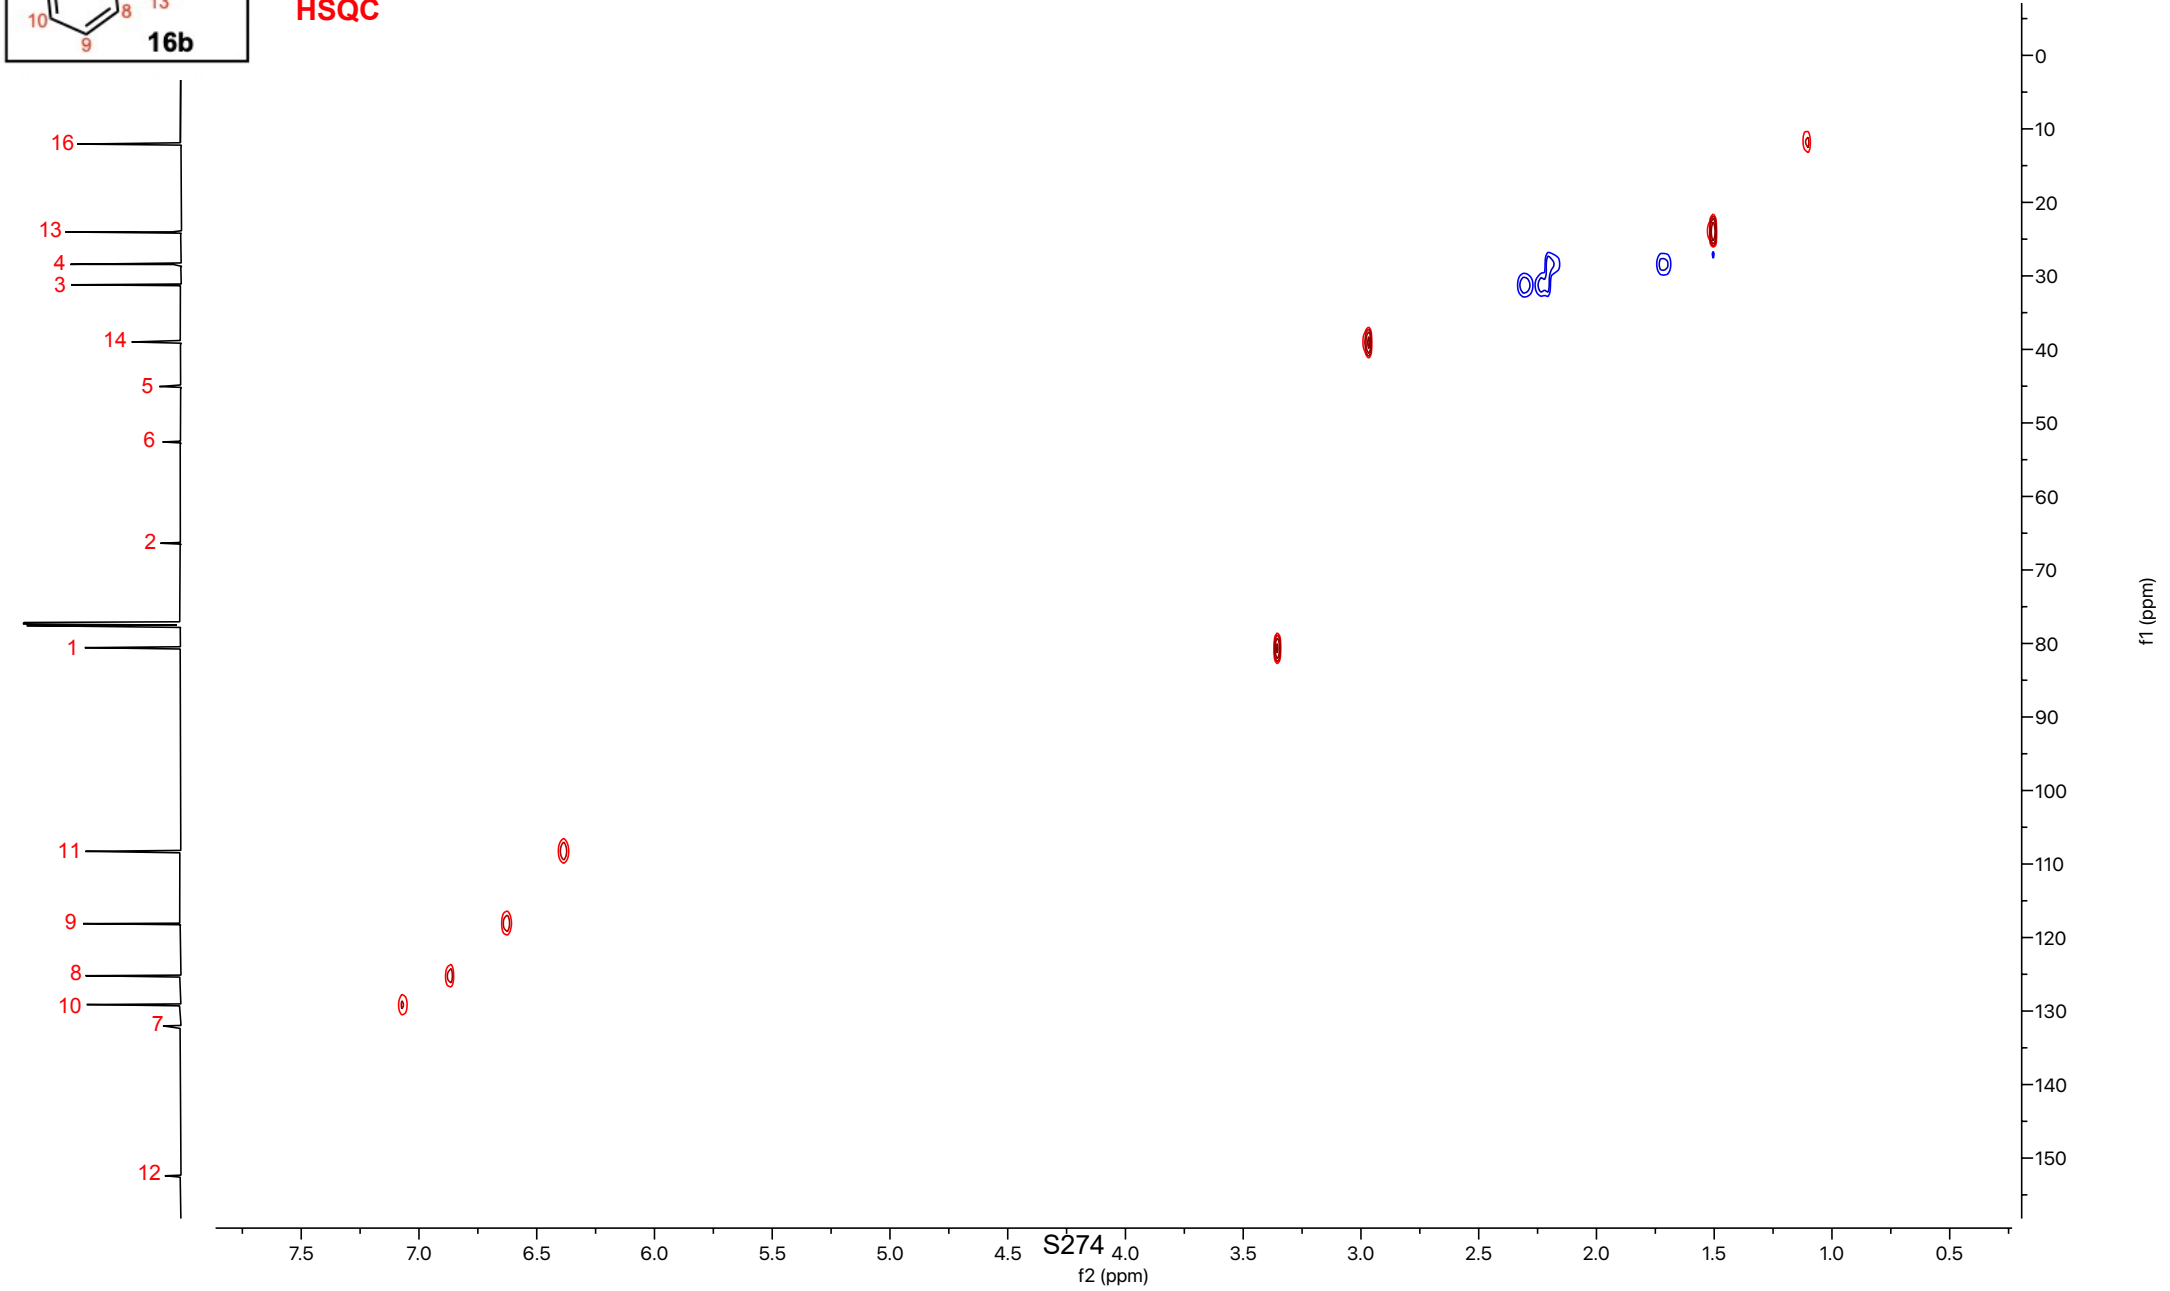

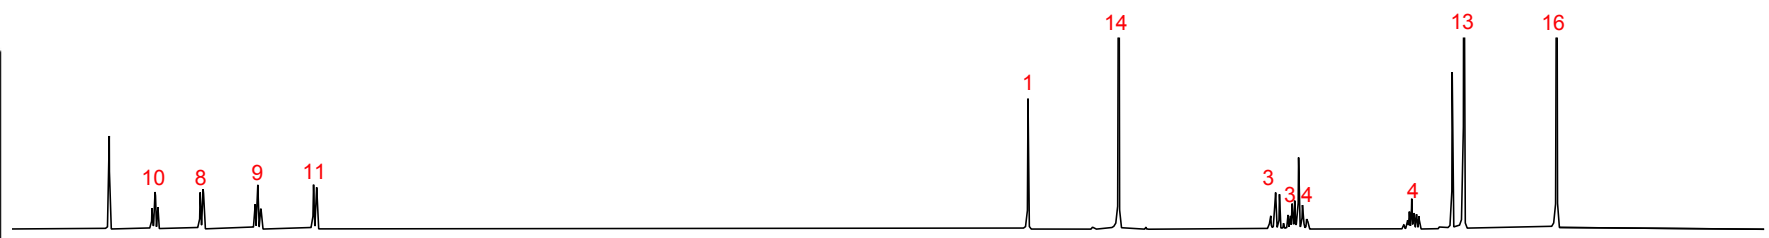

**HMBC**

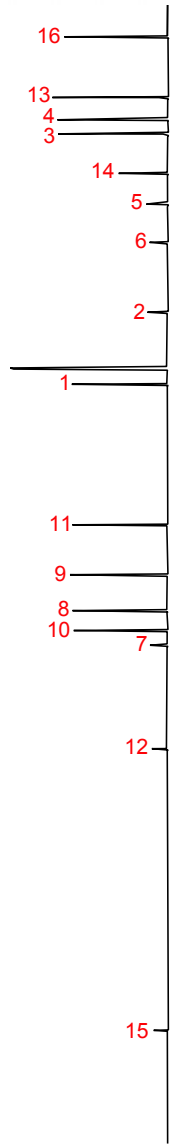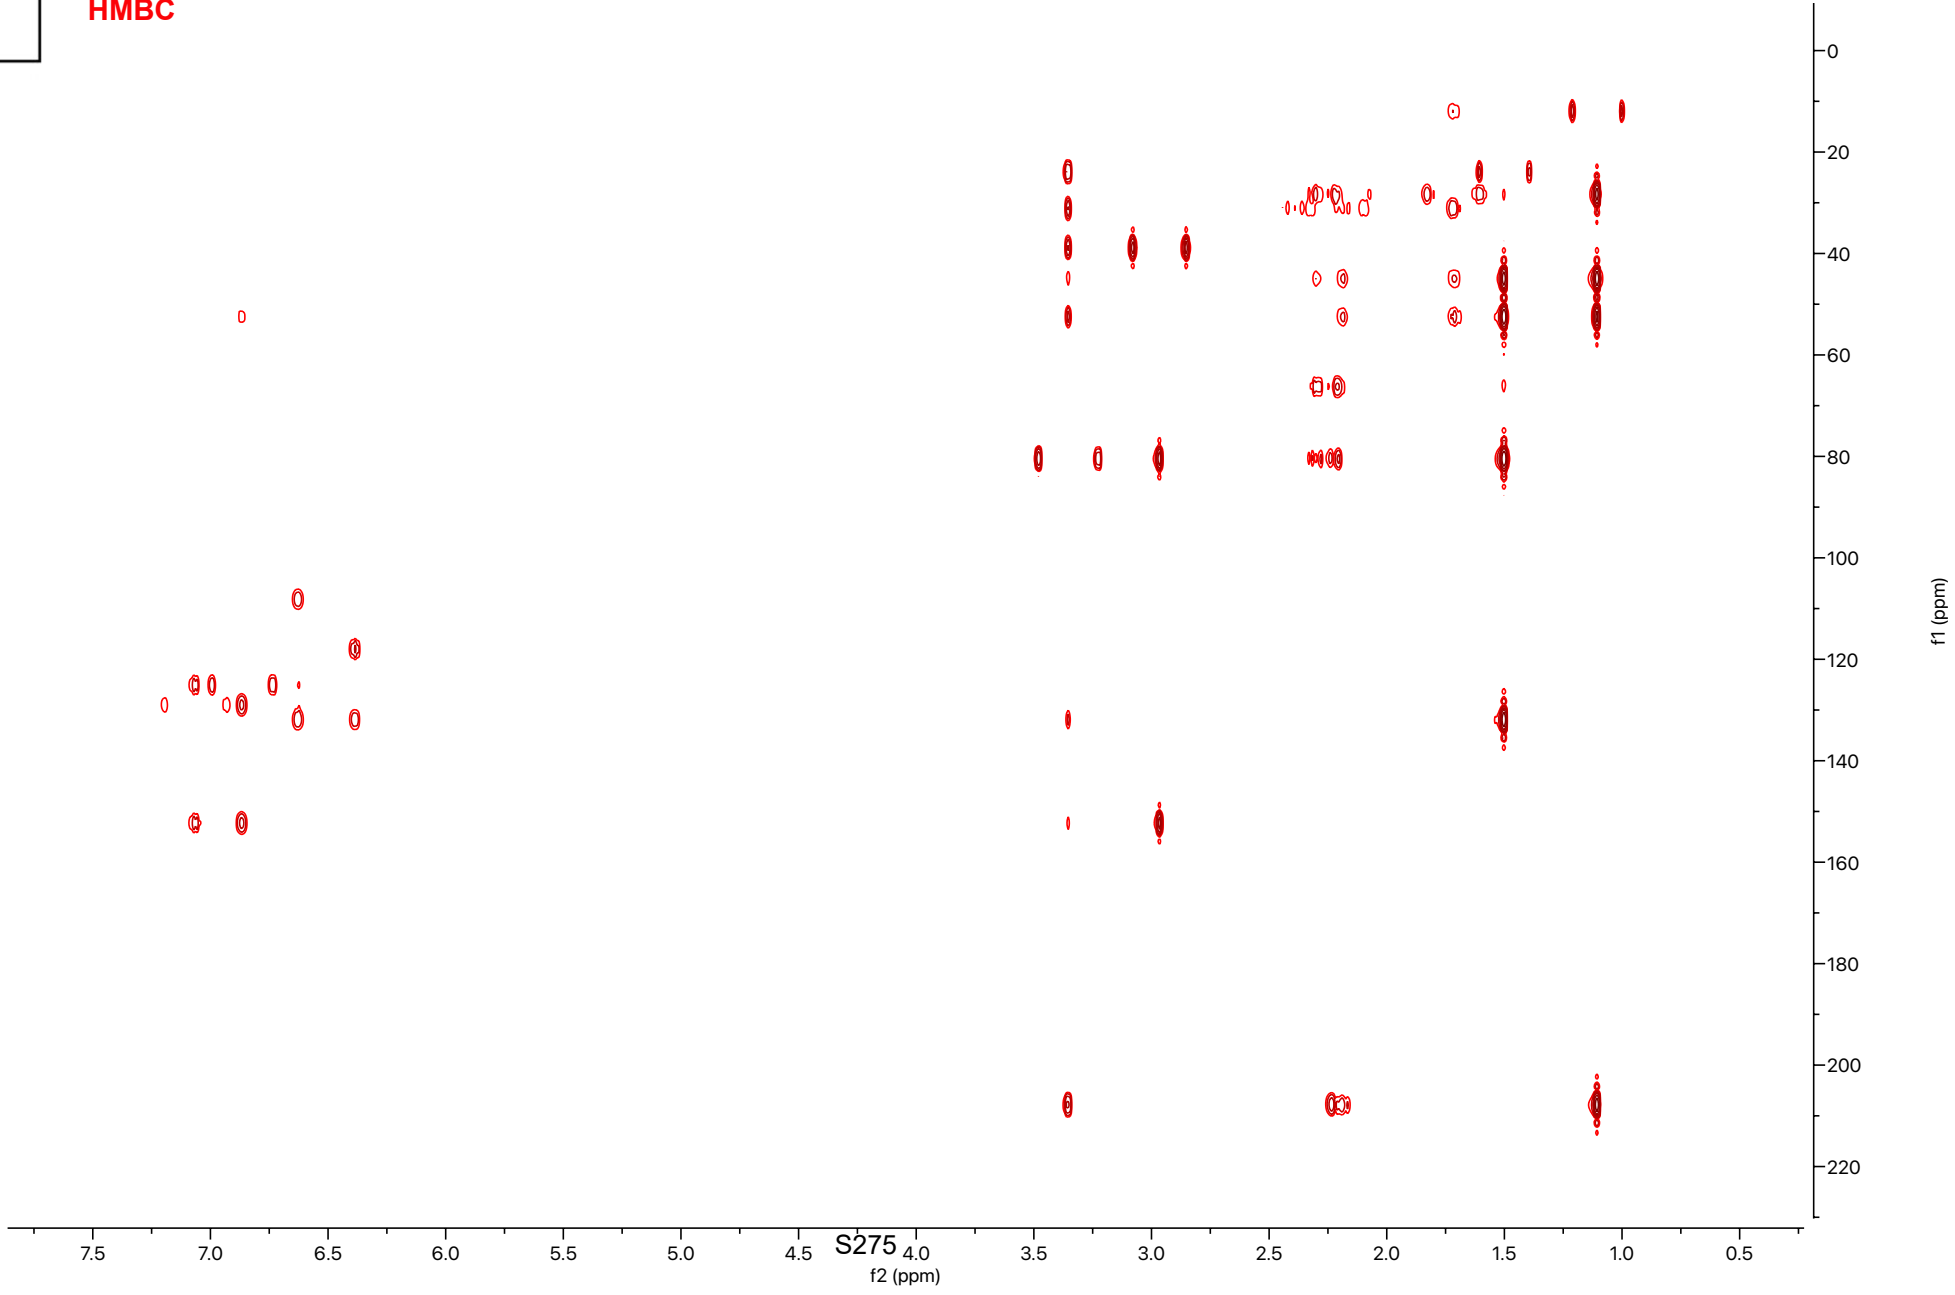

S275

f2 (ppm)

f1 (ppm)

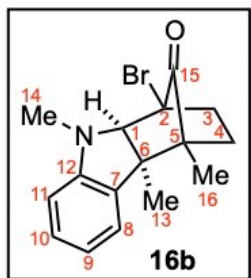

**NOESY**

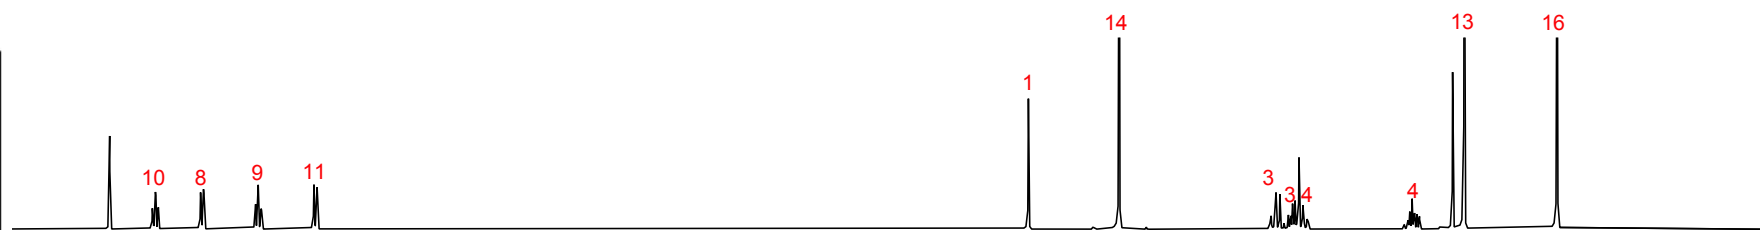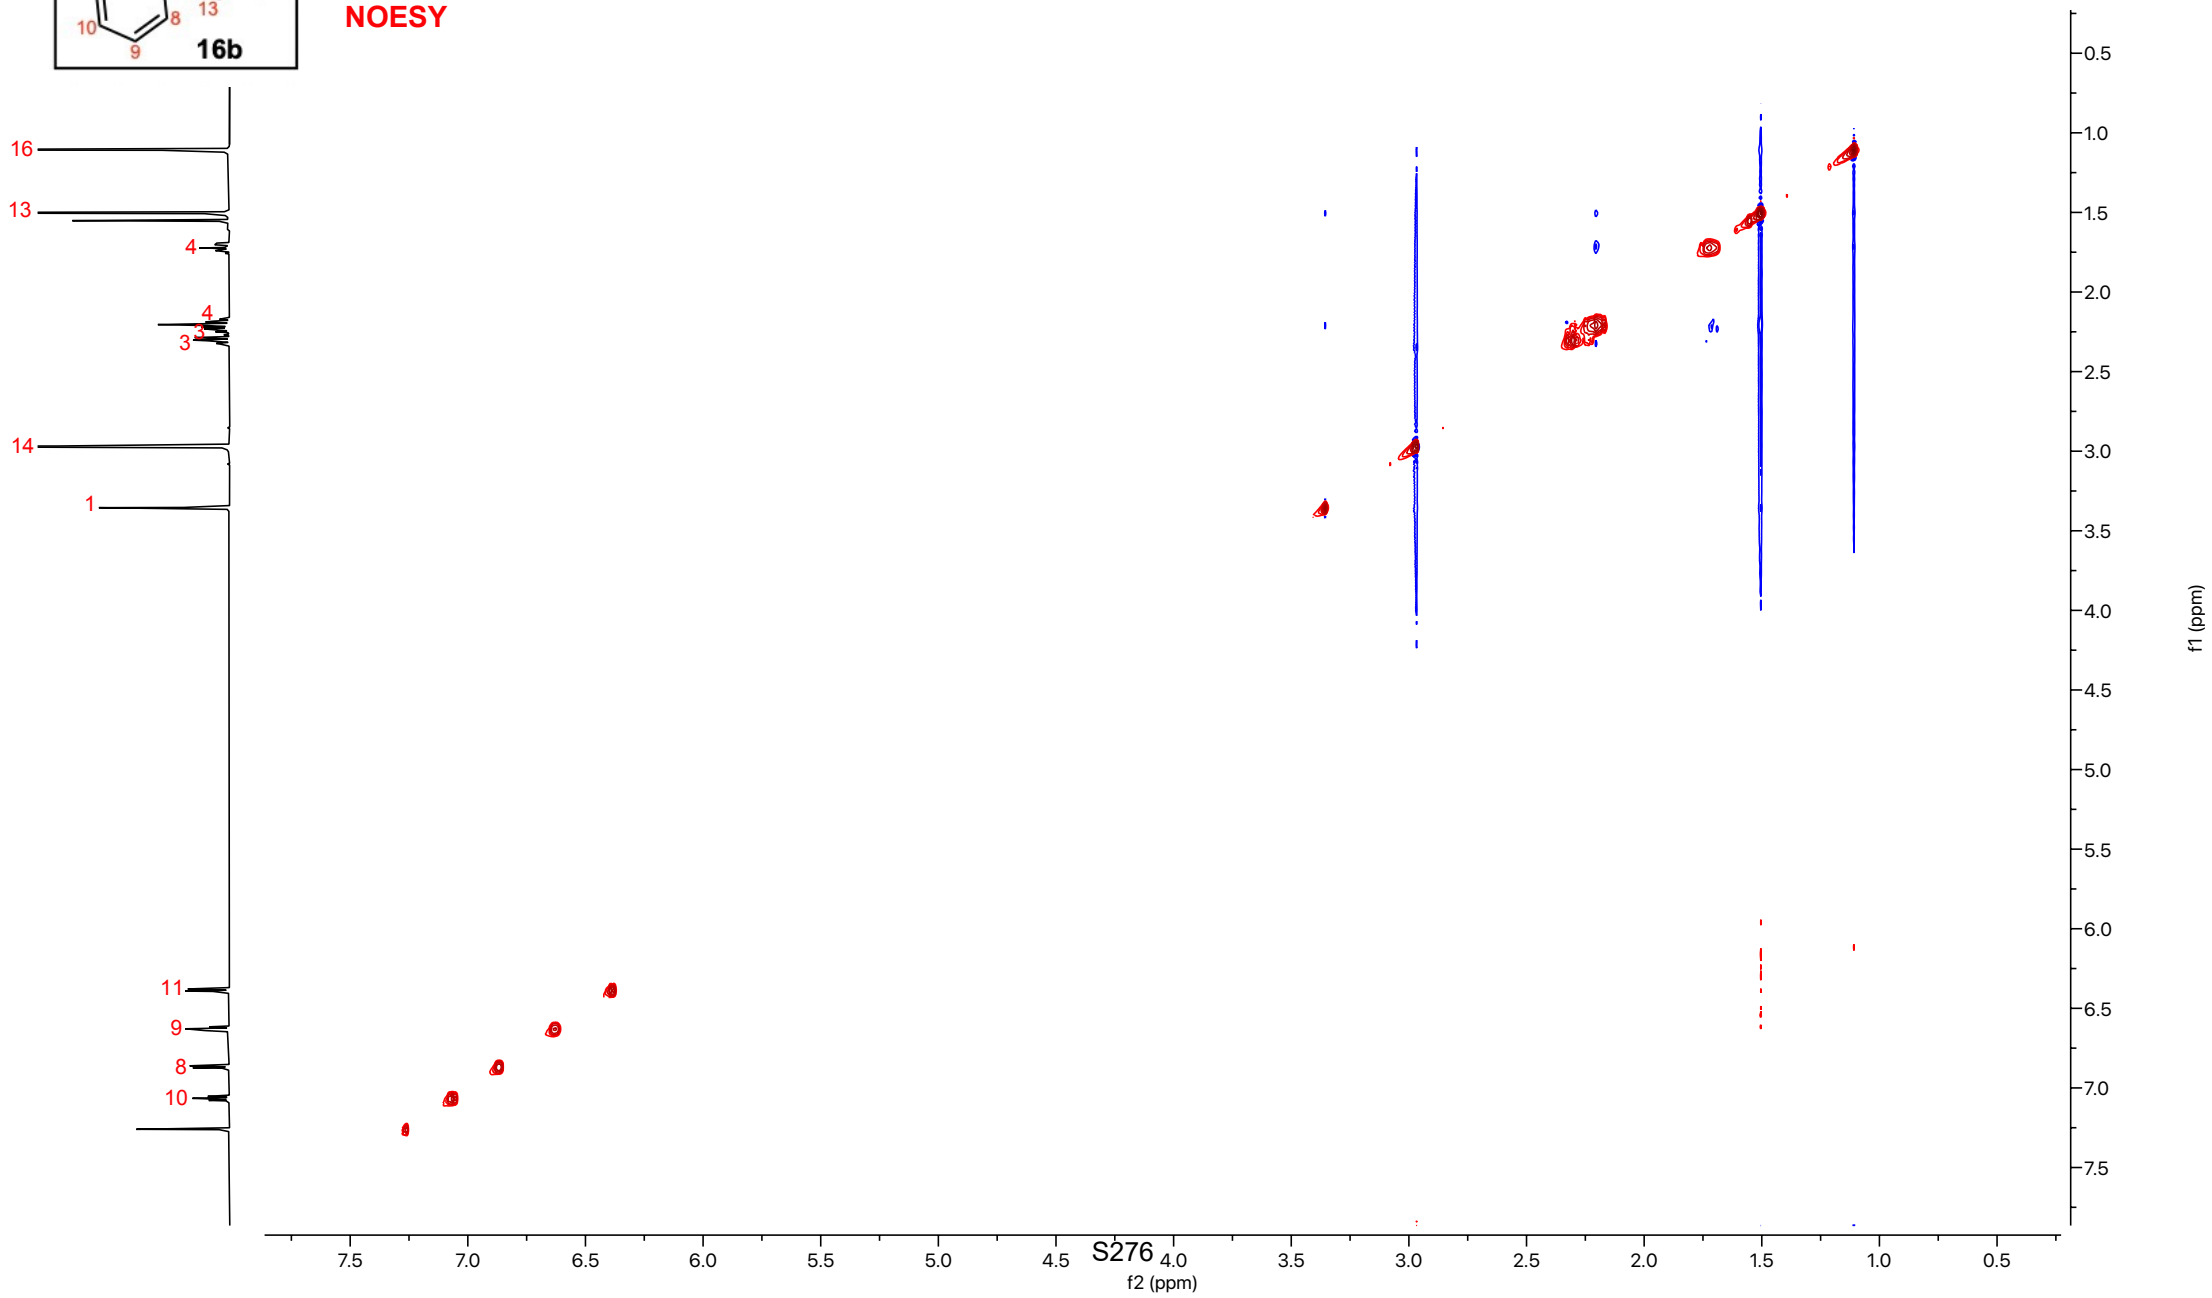

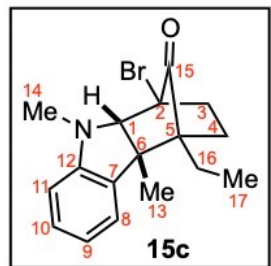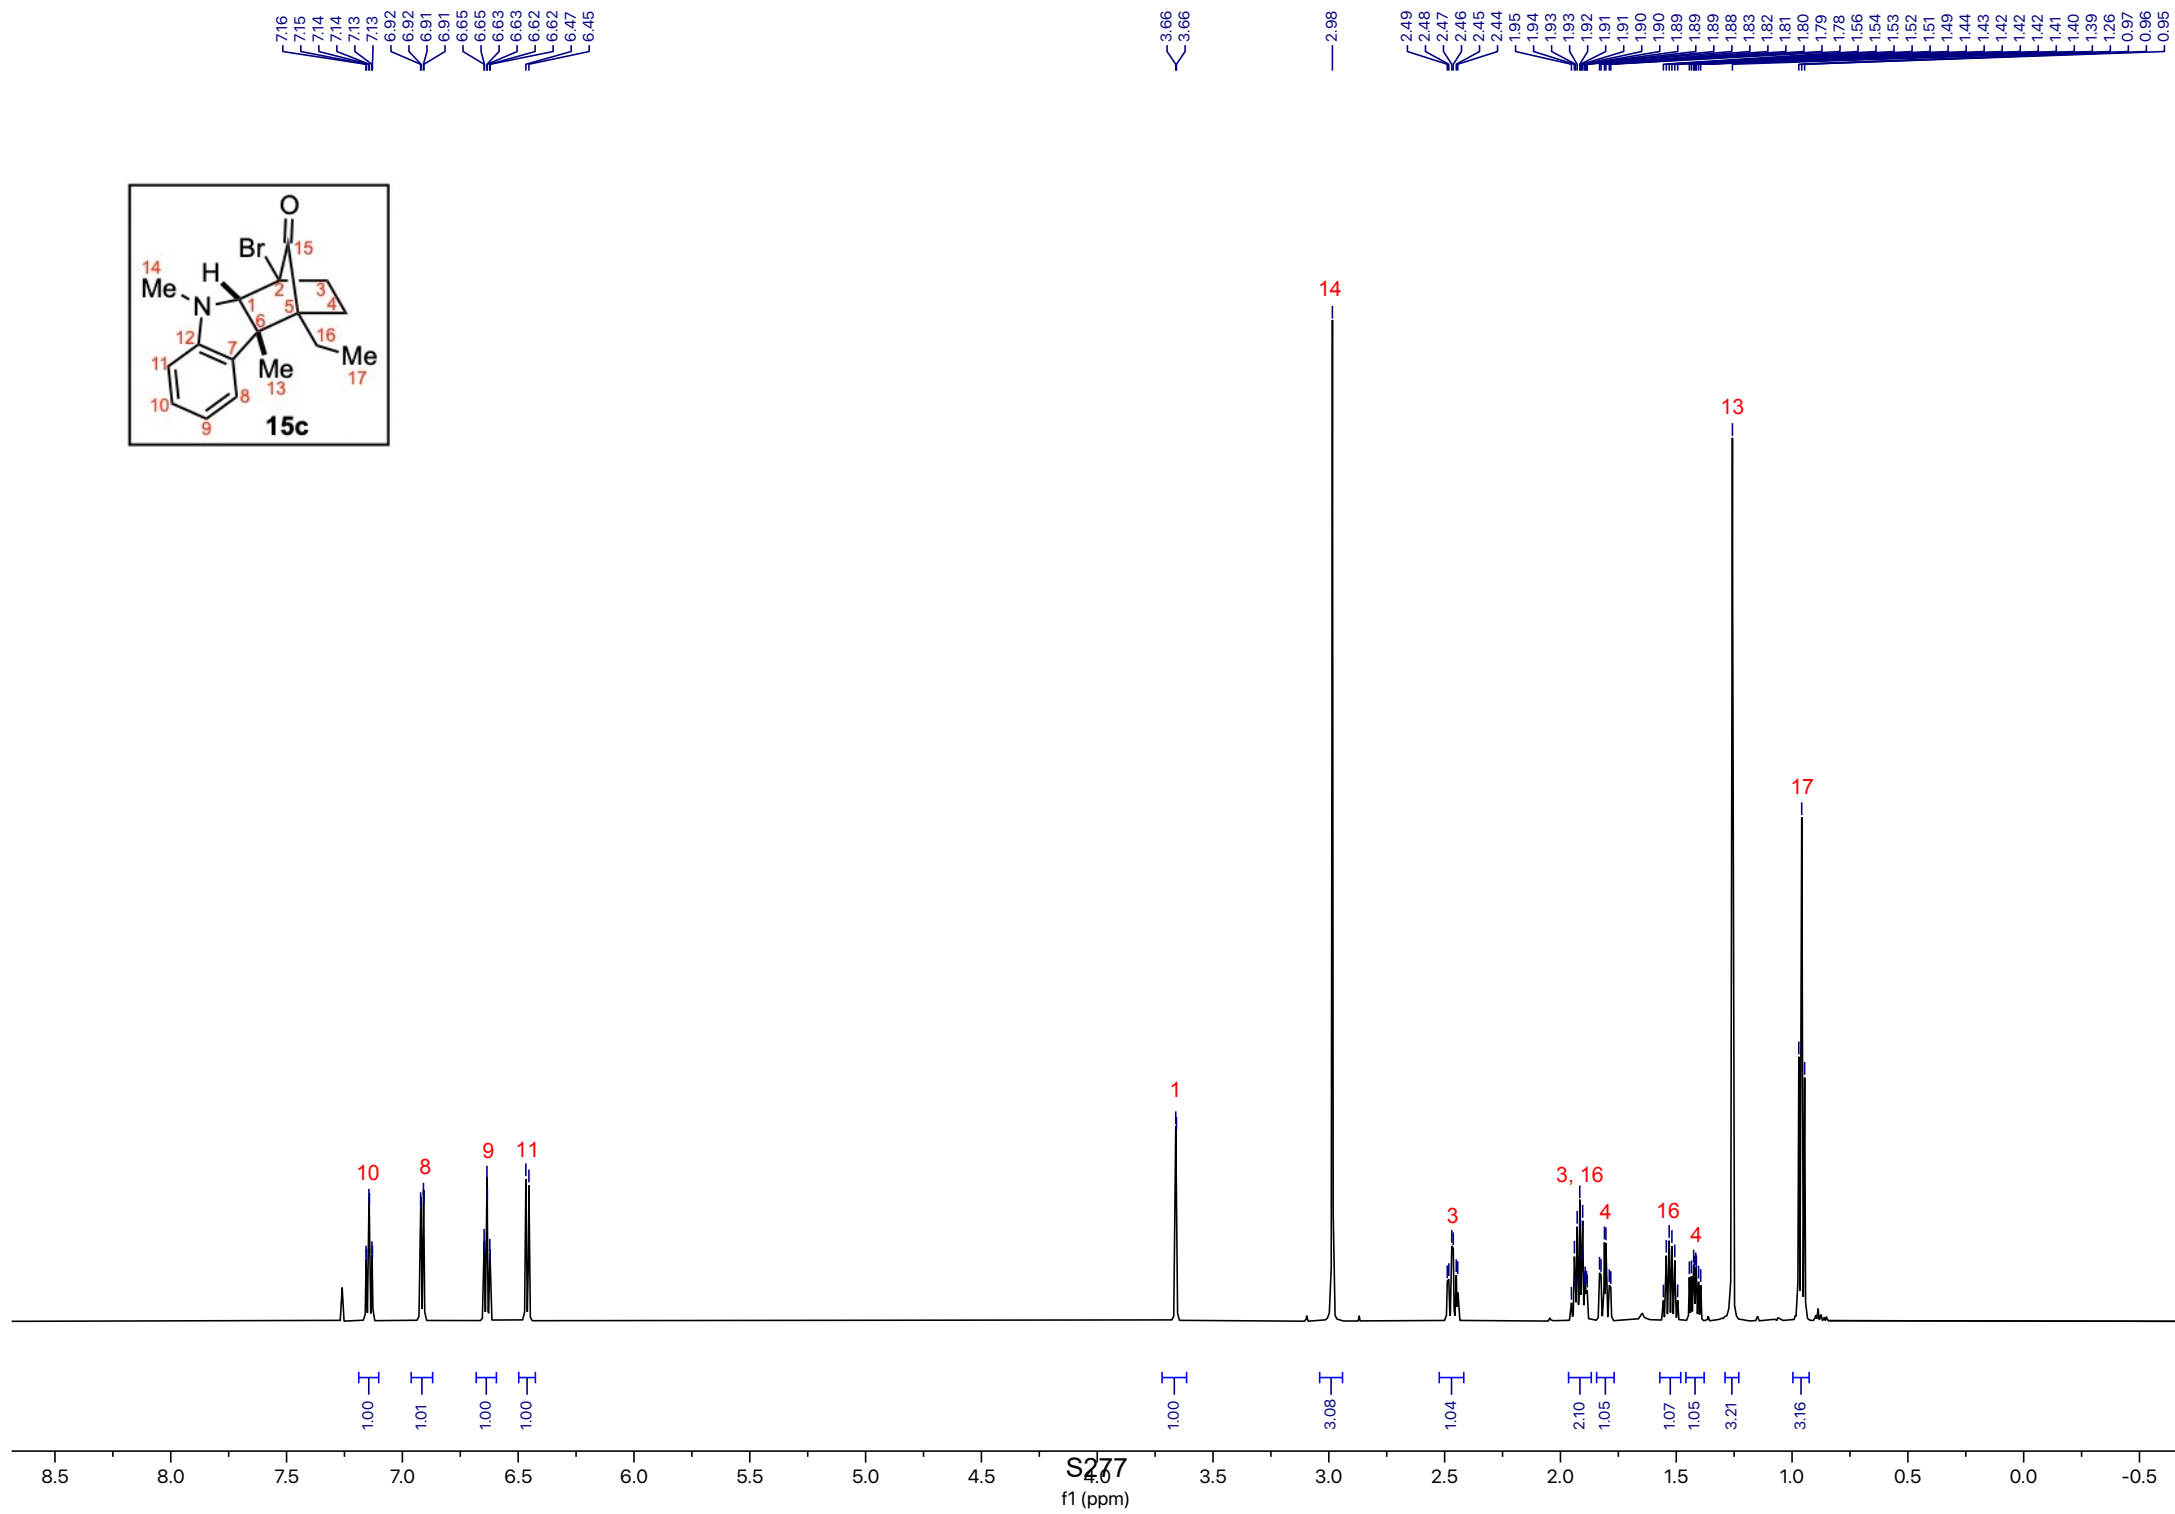

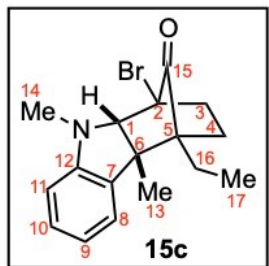

— 207.86

— 153.63

— 130.96  
— 129.15

— 124.44

— 117.57

— 106.06

— 79.16

— 63.80

— 53.15

— 49.03

— 34.85

— 27.41  
— 25.91  
— 24.16

— 18.33

— 9.34

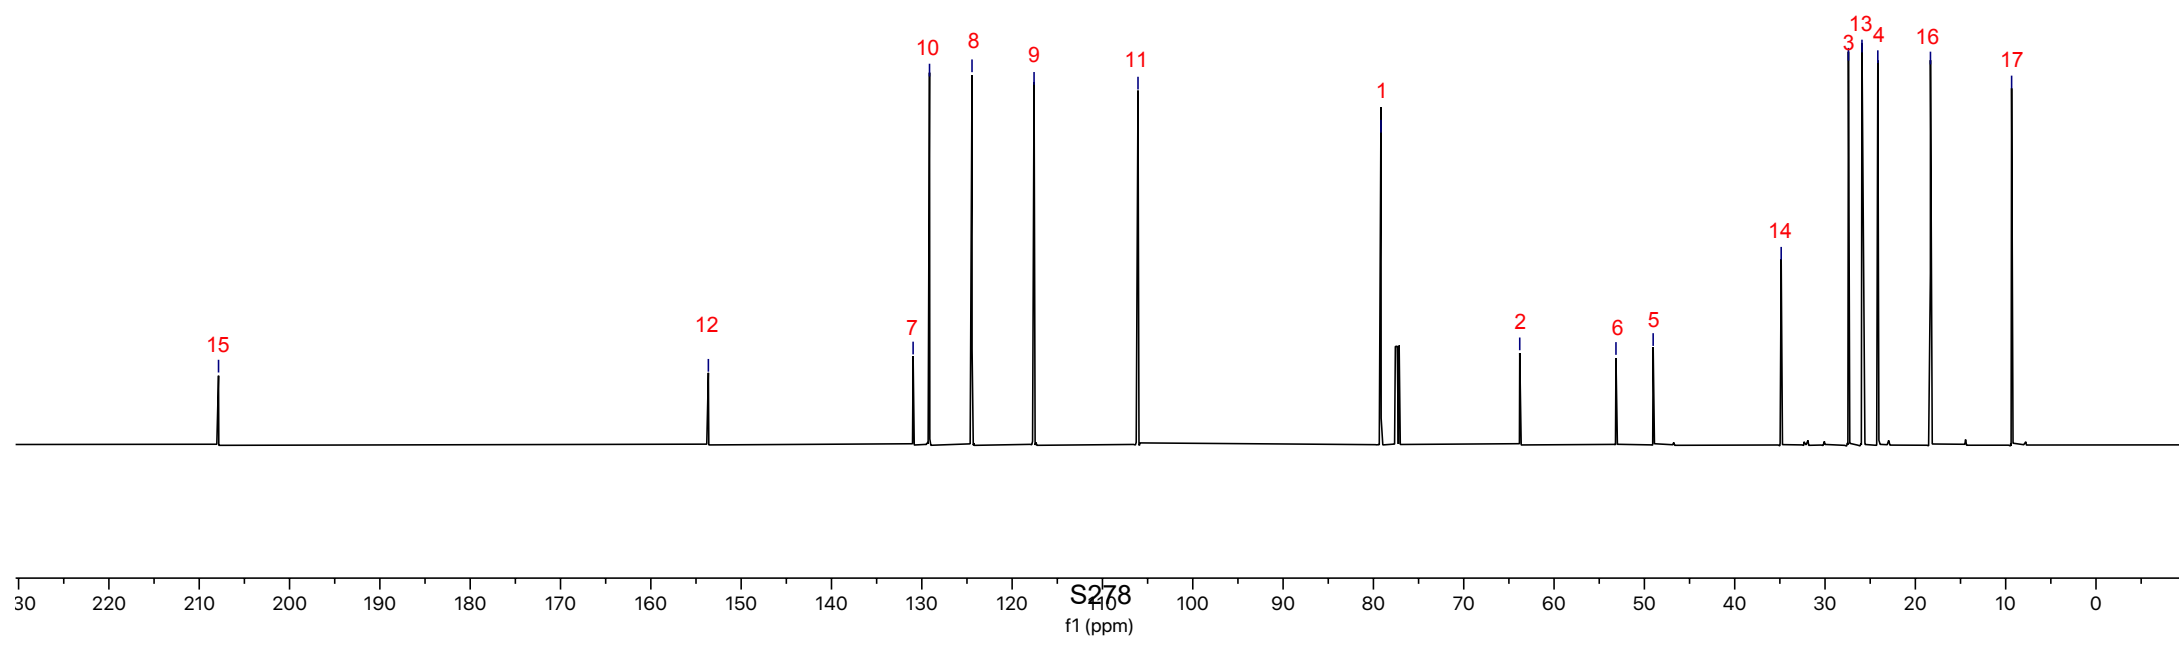

S278  
440  
f1 (ppm)

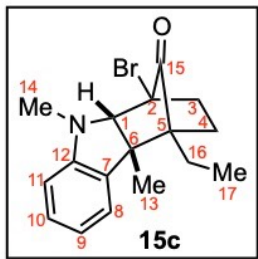

**COSY**

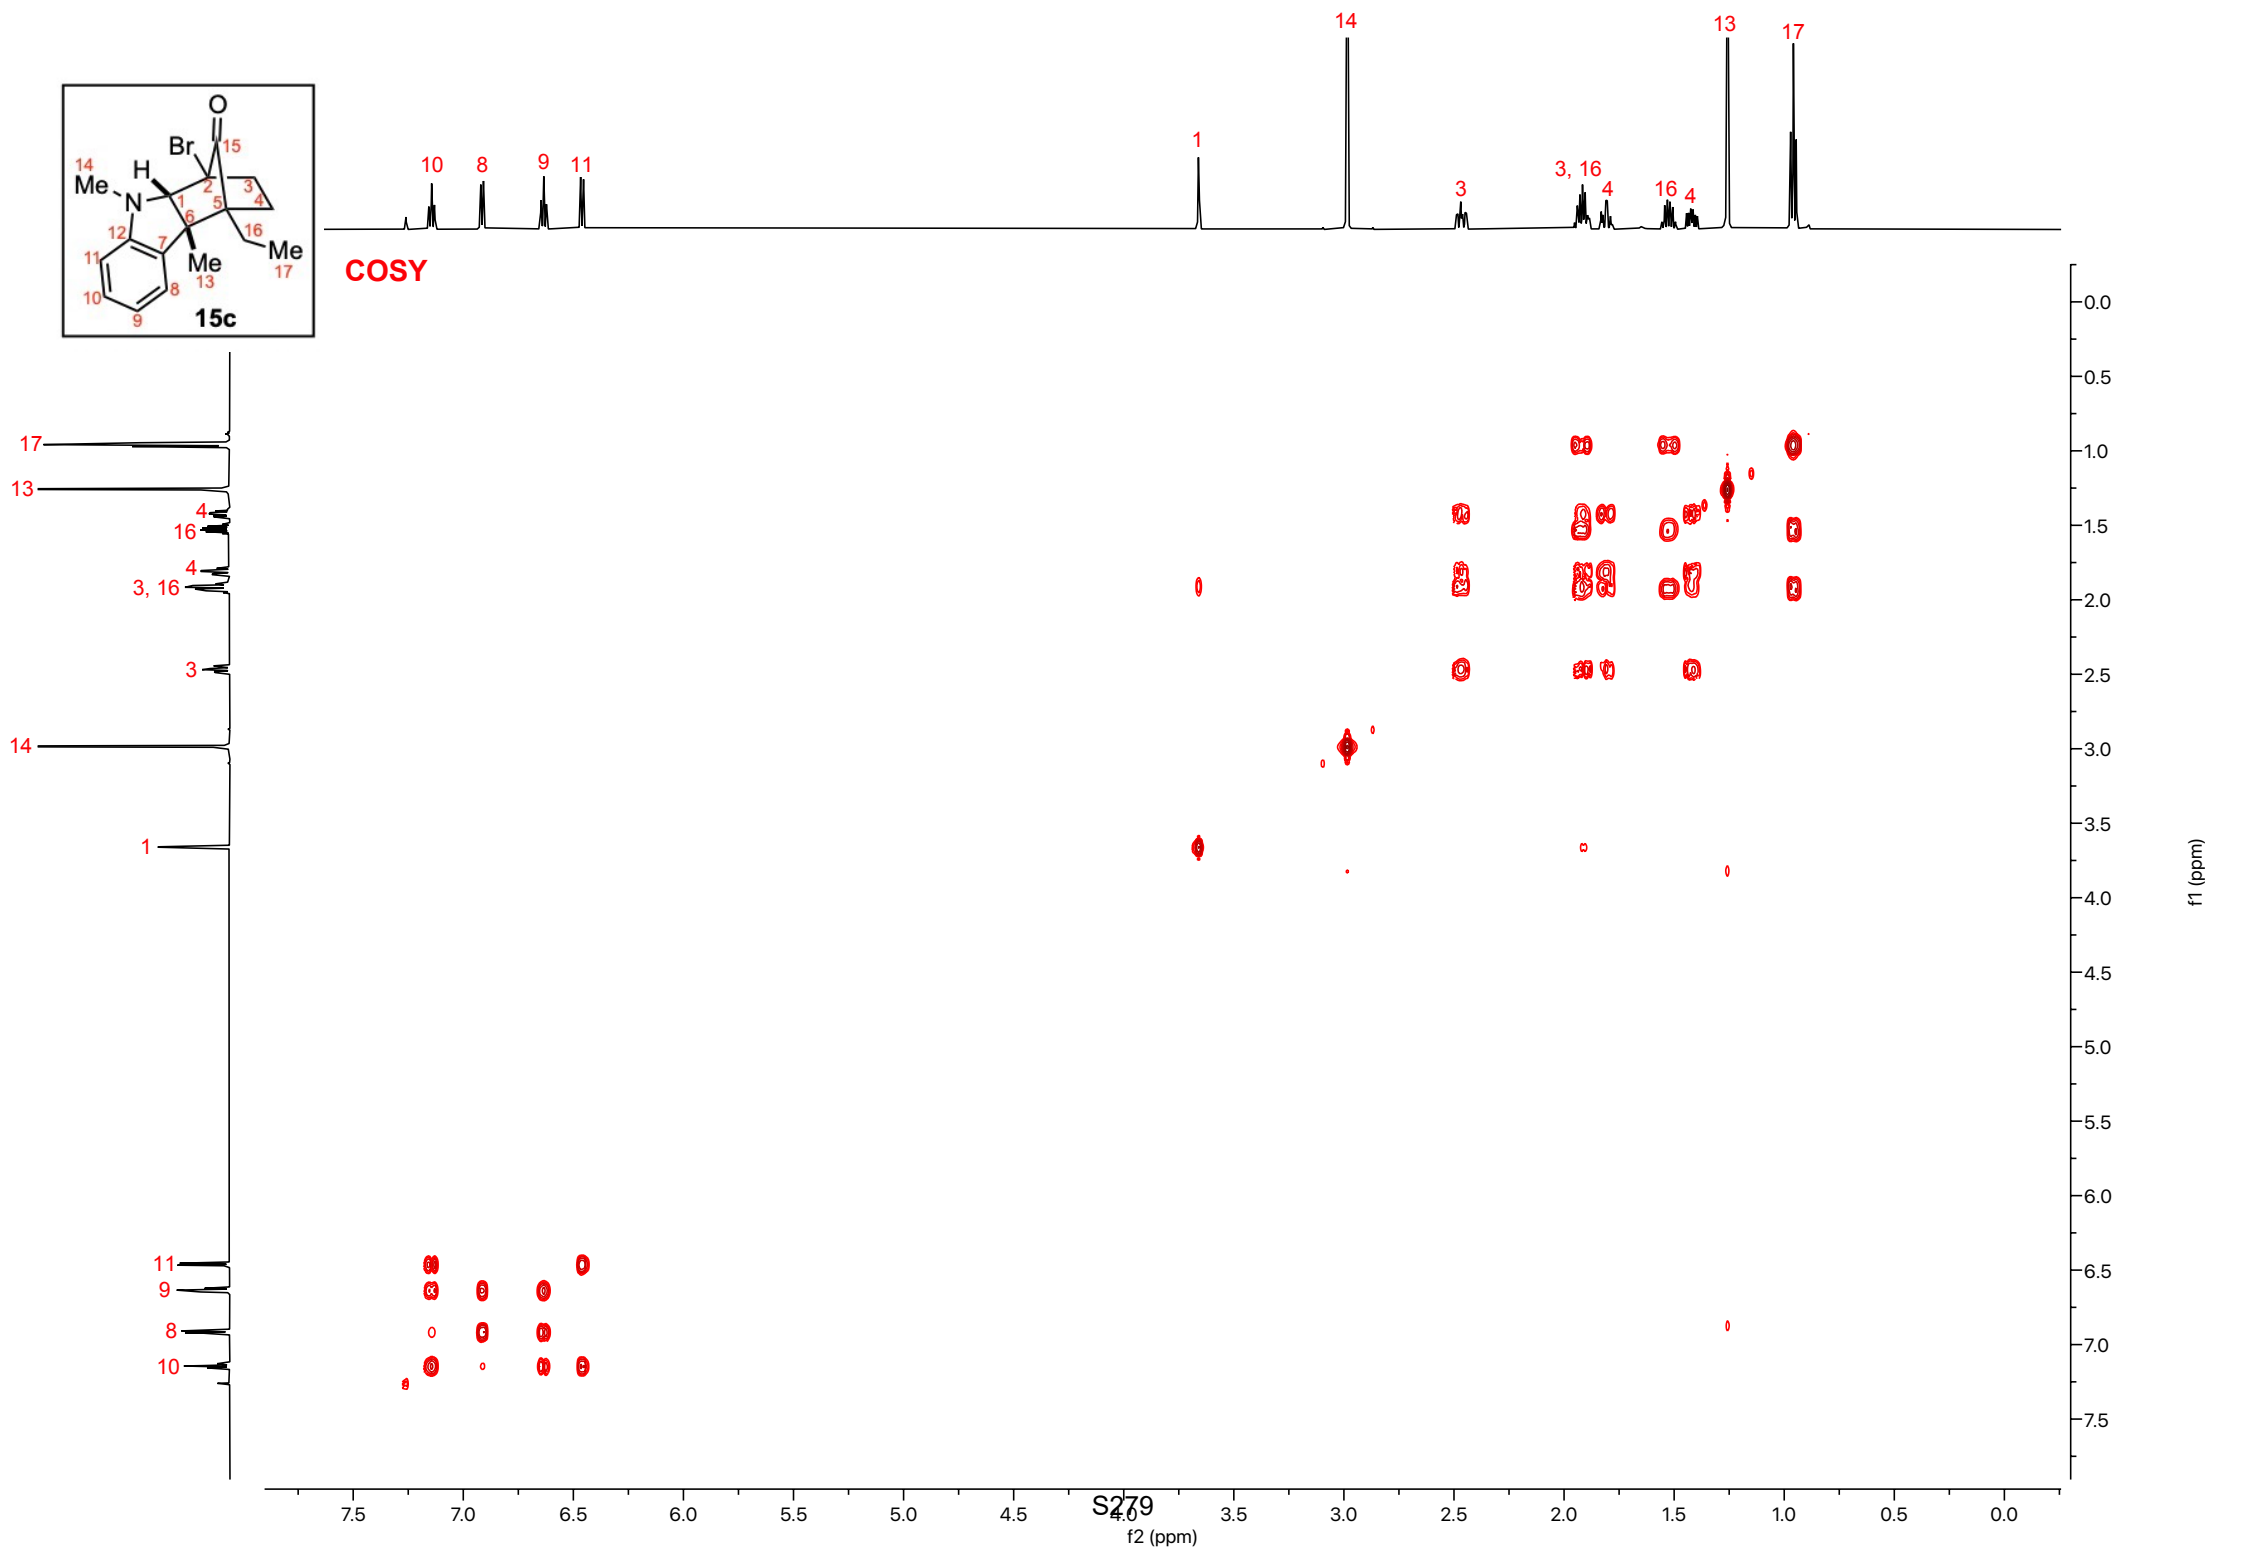



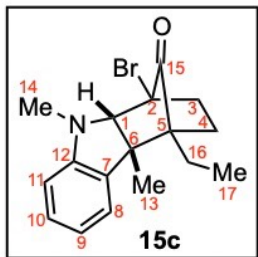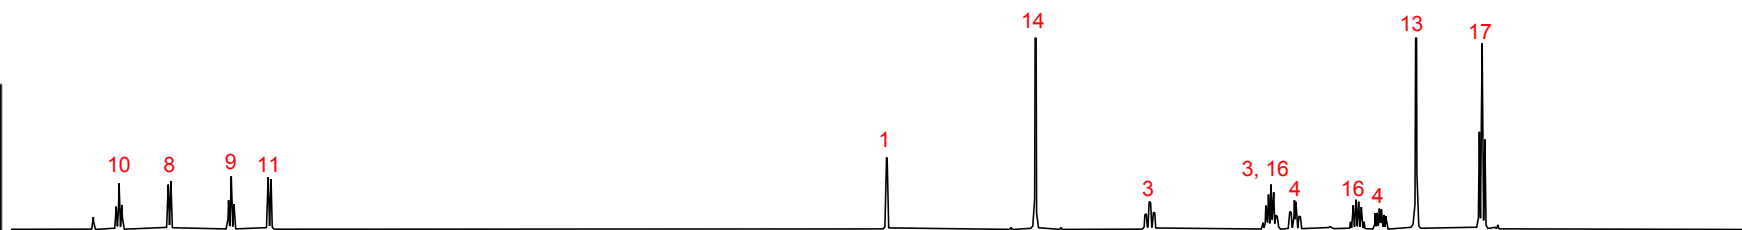

**HSQC**

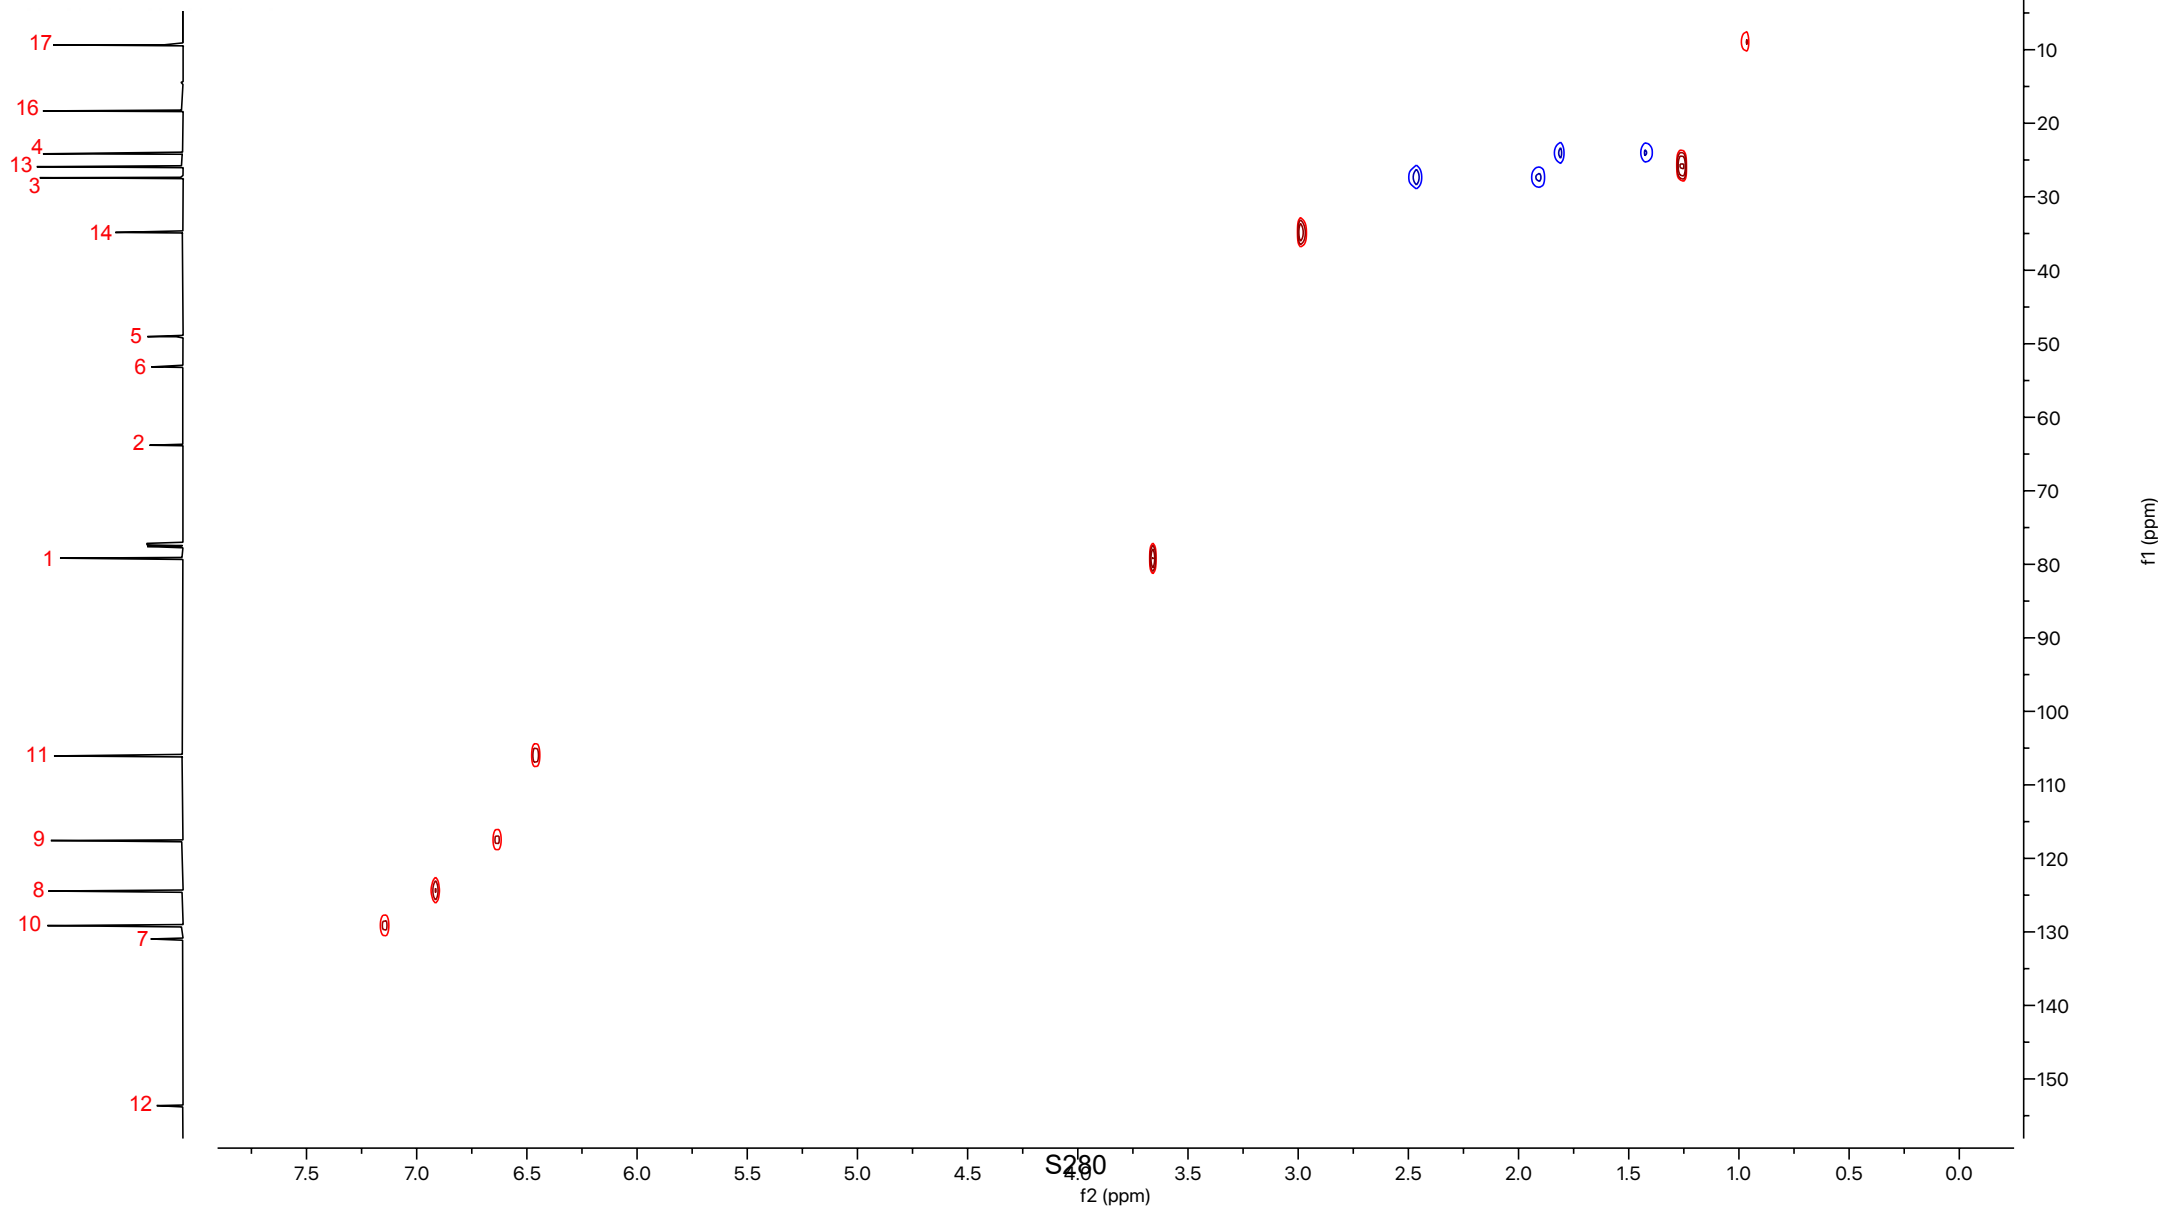



**HMBC**

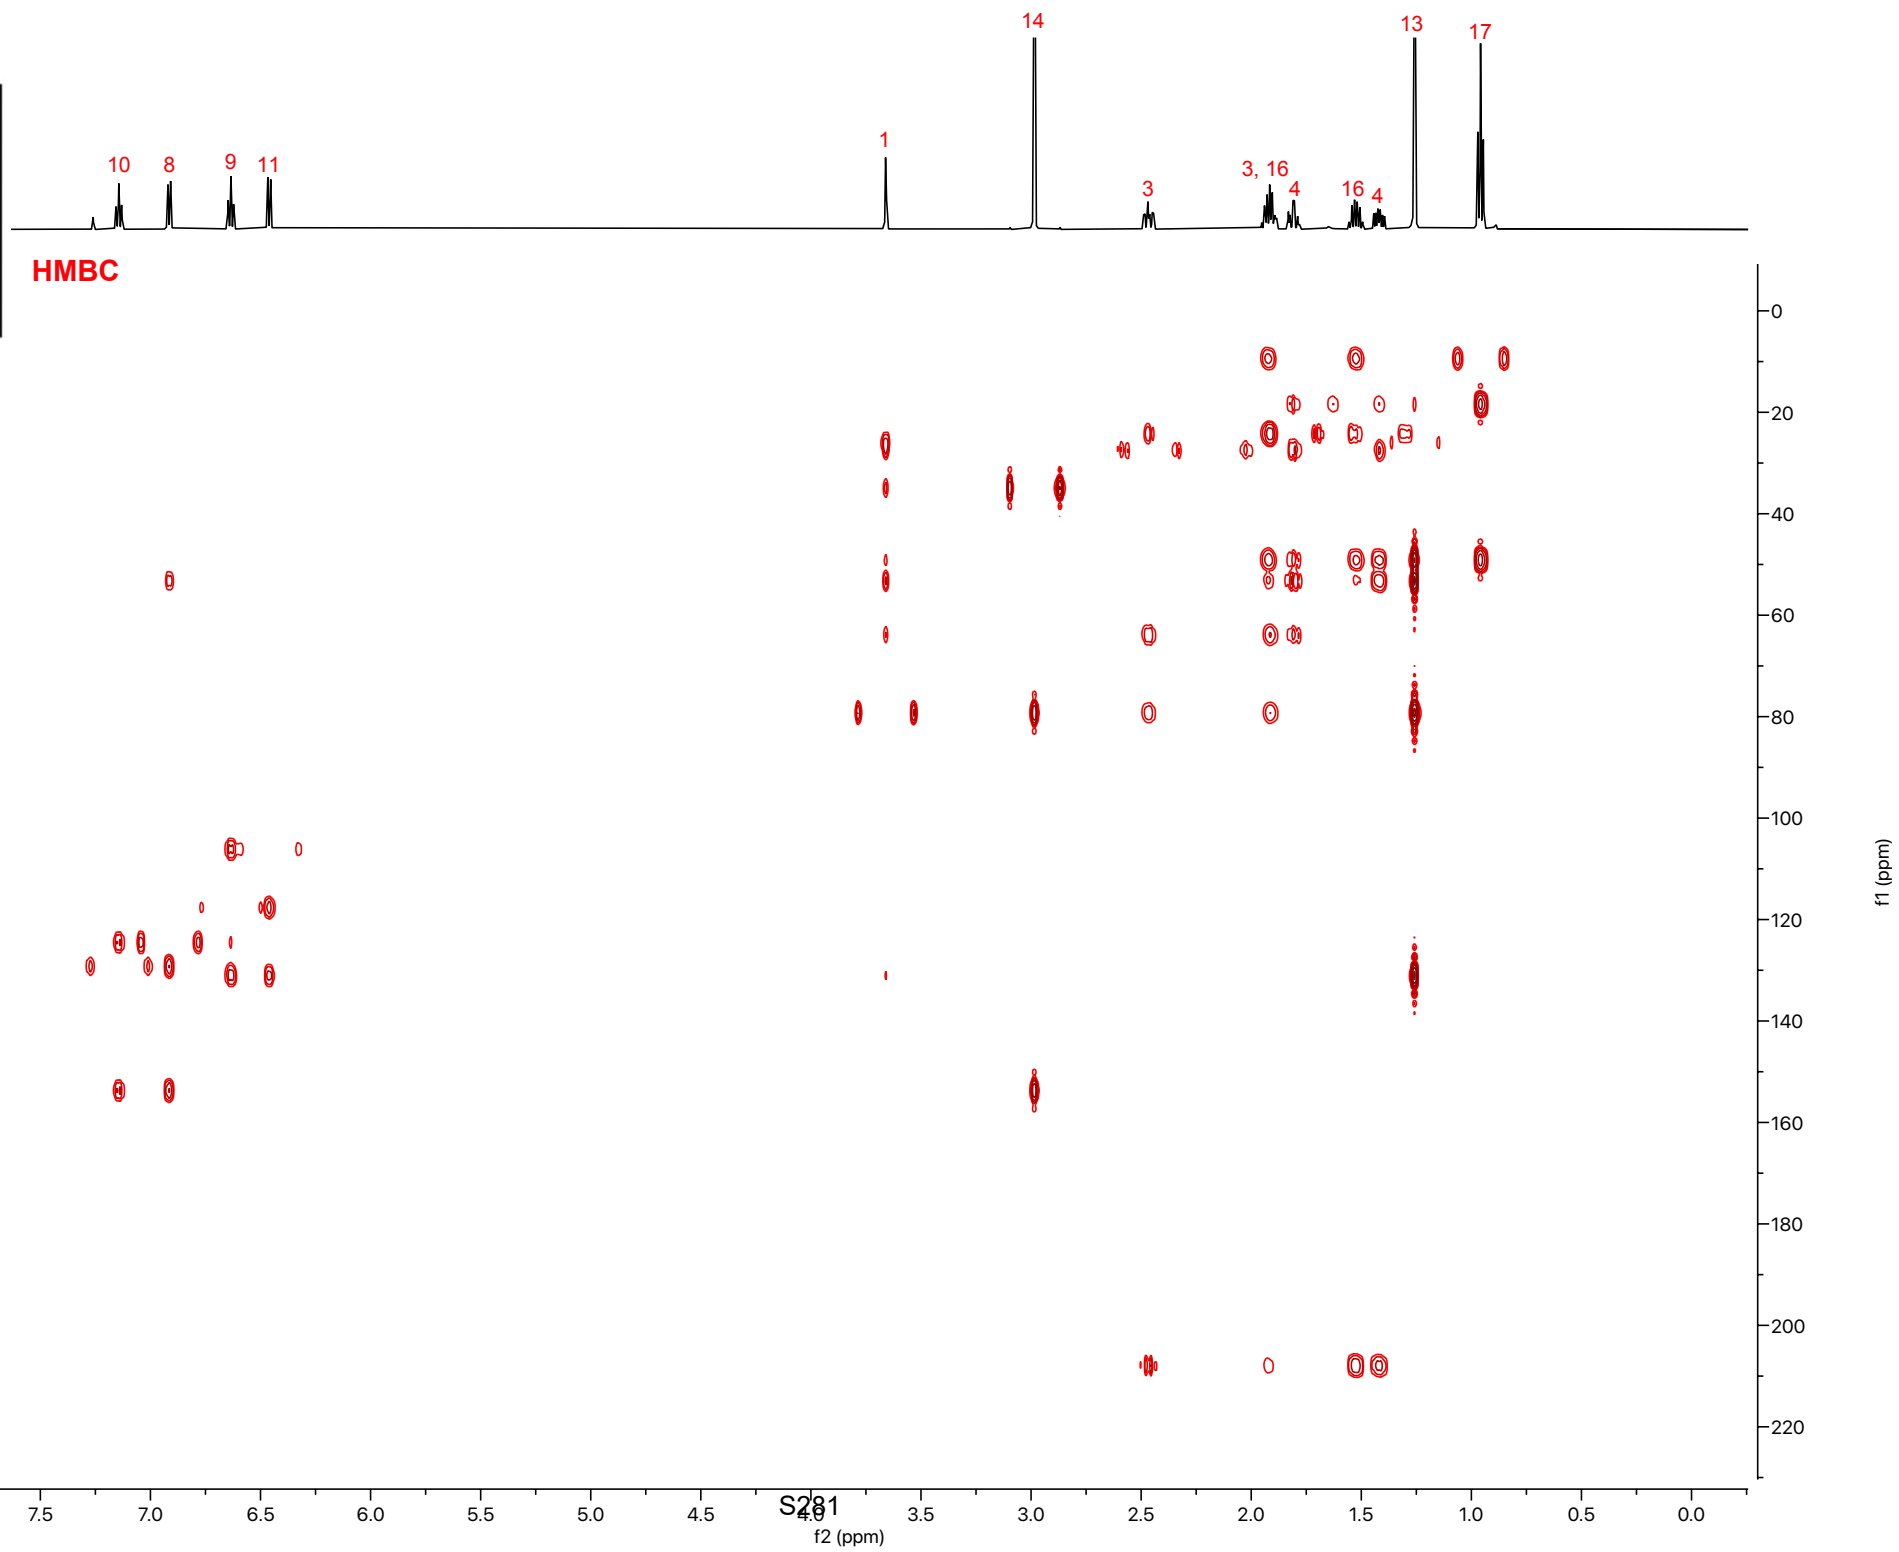

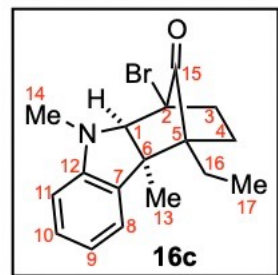

7.08  
7.08  
7.07  
7.07  
7.06  
7.06  
6.91  
6.91  
6.90  
6.89  
6.89  
6.65  
6.65  
6.64  
6.64  
6.63  
6.63  
6.40  
6.38

3.29  
2.96  
2.96  
2.33  
2.33  
2.31  
2.31  
2.29  
2.29  
2.29  
2.26  
2.26  
2.24  
2.24  
2.23  
2.23  
2.22  
2.22  
2.21  
2.21  
2.12  
2.12  
2.10  
2.10  
2.09  
2.09  
2.08  
2.08  
1.95  
1.95  
1.94  
1.94  
1.93  
1.93  
1.92  
1.91  
1.91  
1.90  
1.90  
1.67  
1.67  
1.66  
1.66  
1.65  
1.65  
1.64  
1.64  
1.64  
1.64  
1.62  
1.62  
1.60  
1.60  
1.54  
1.54  
1.00  
1.00  
0.99  
0.99

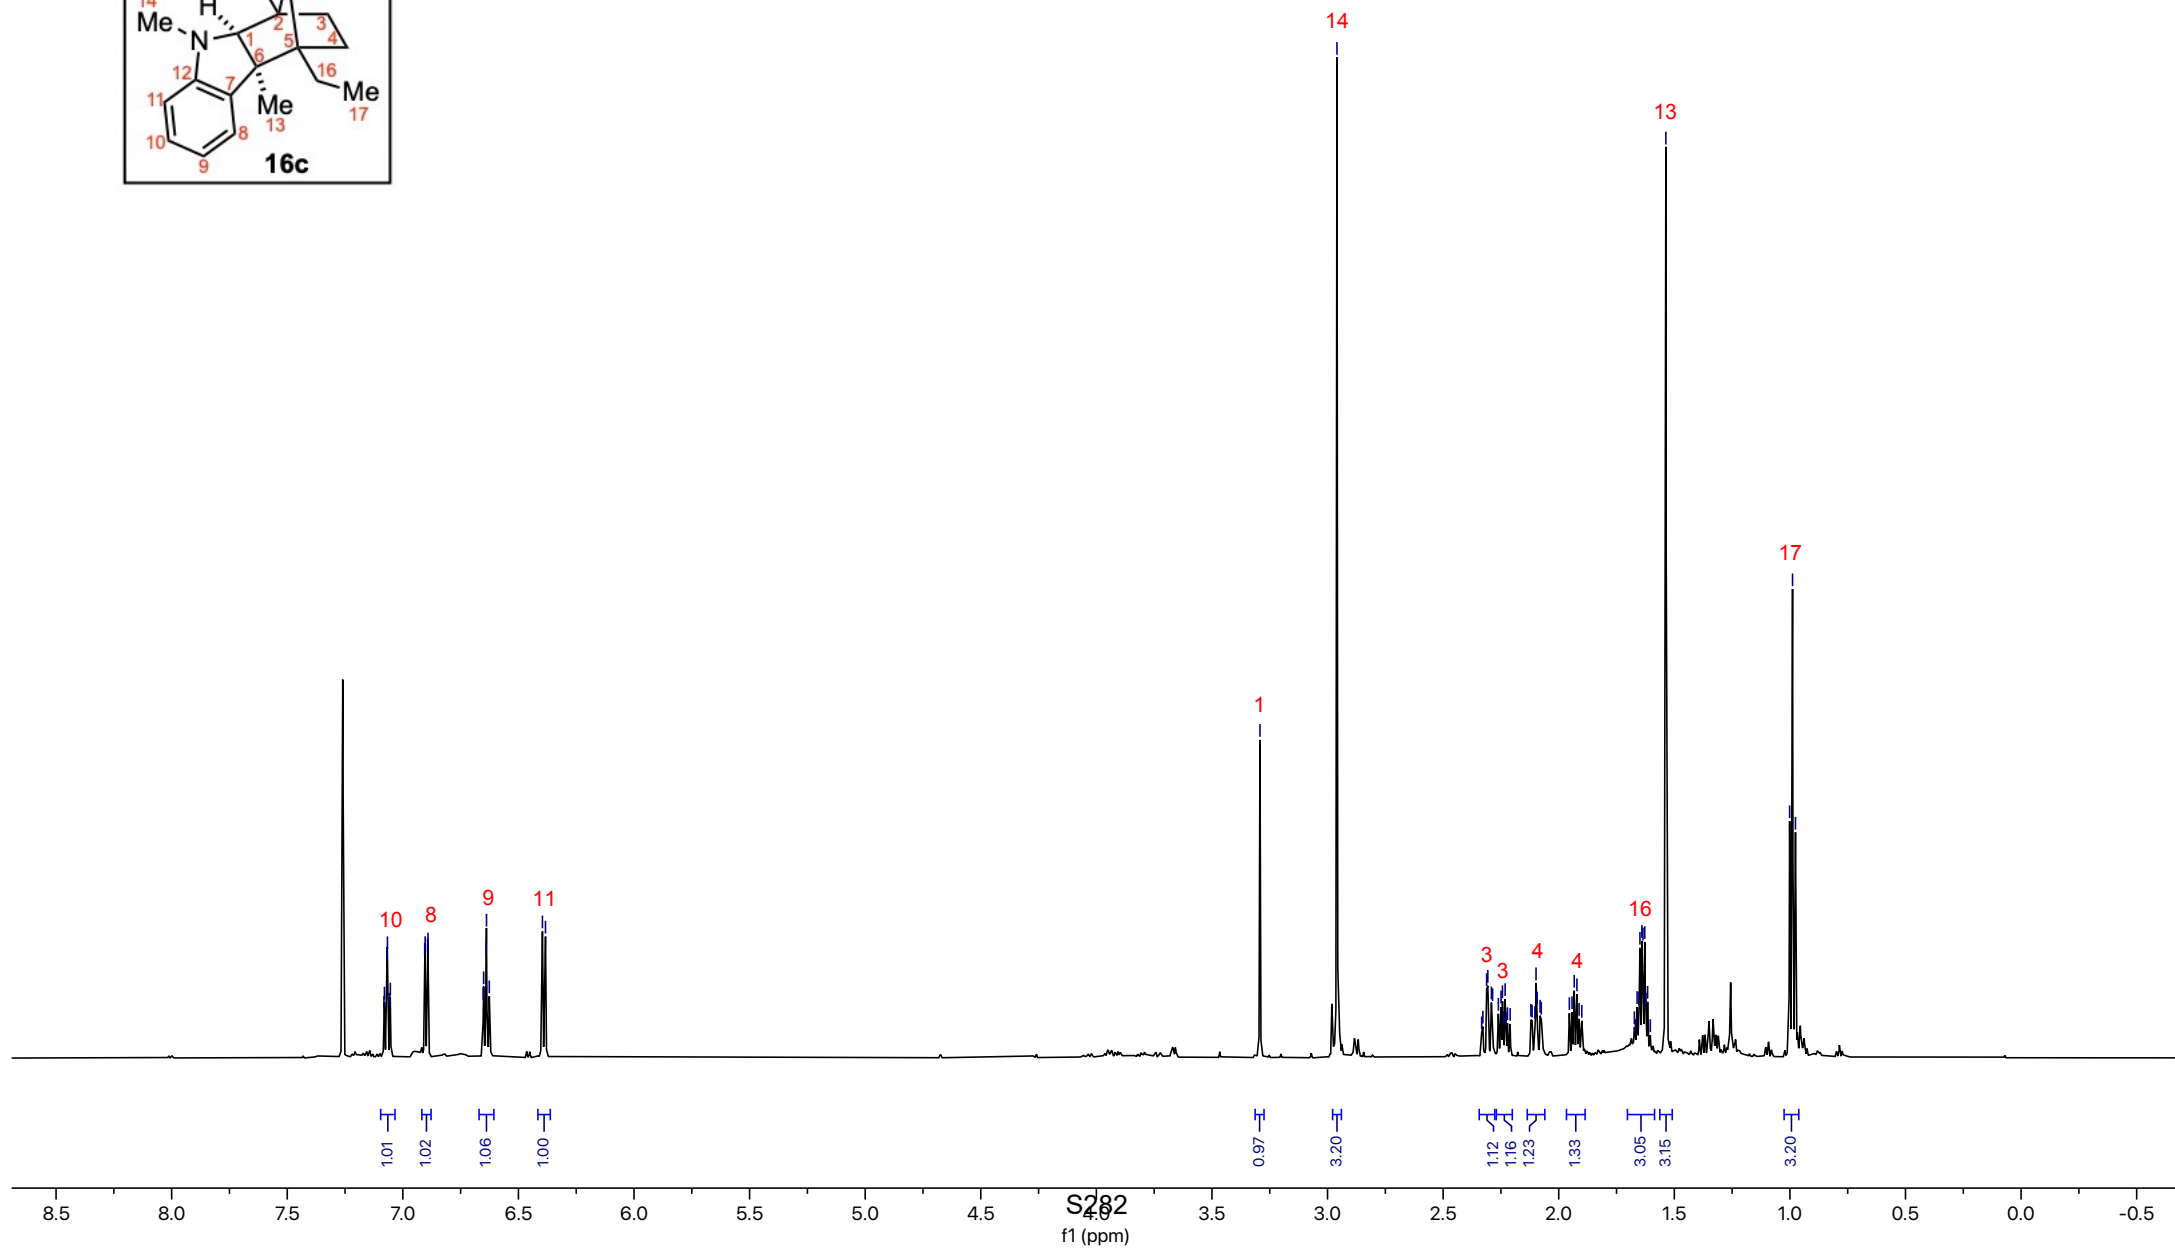

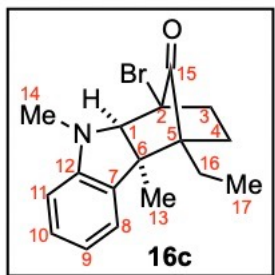

— 207.56

— 152.60

— 131.72

— 129.12

— 125.36

— 118.16

— 108.38

— 80.94

— 66.28

— 53.42

— 48.09

— 39.08

— 30.89

— 25.45

— 23.63

— 19.53

— 9.95

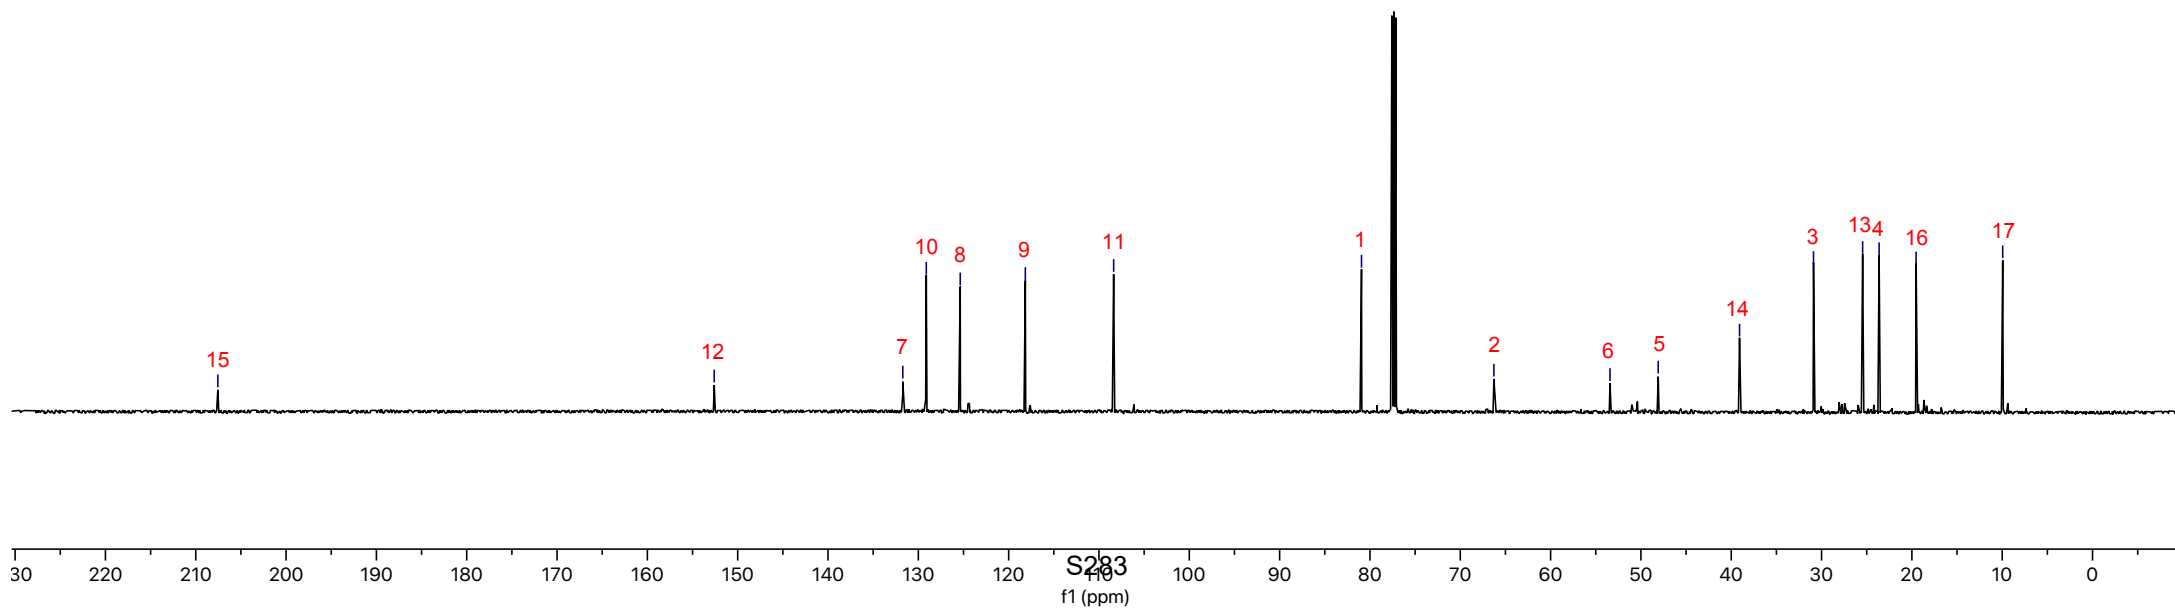

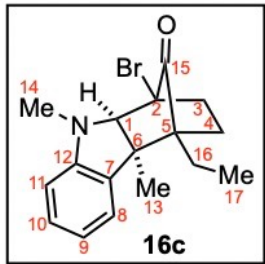

COSY

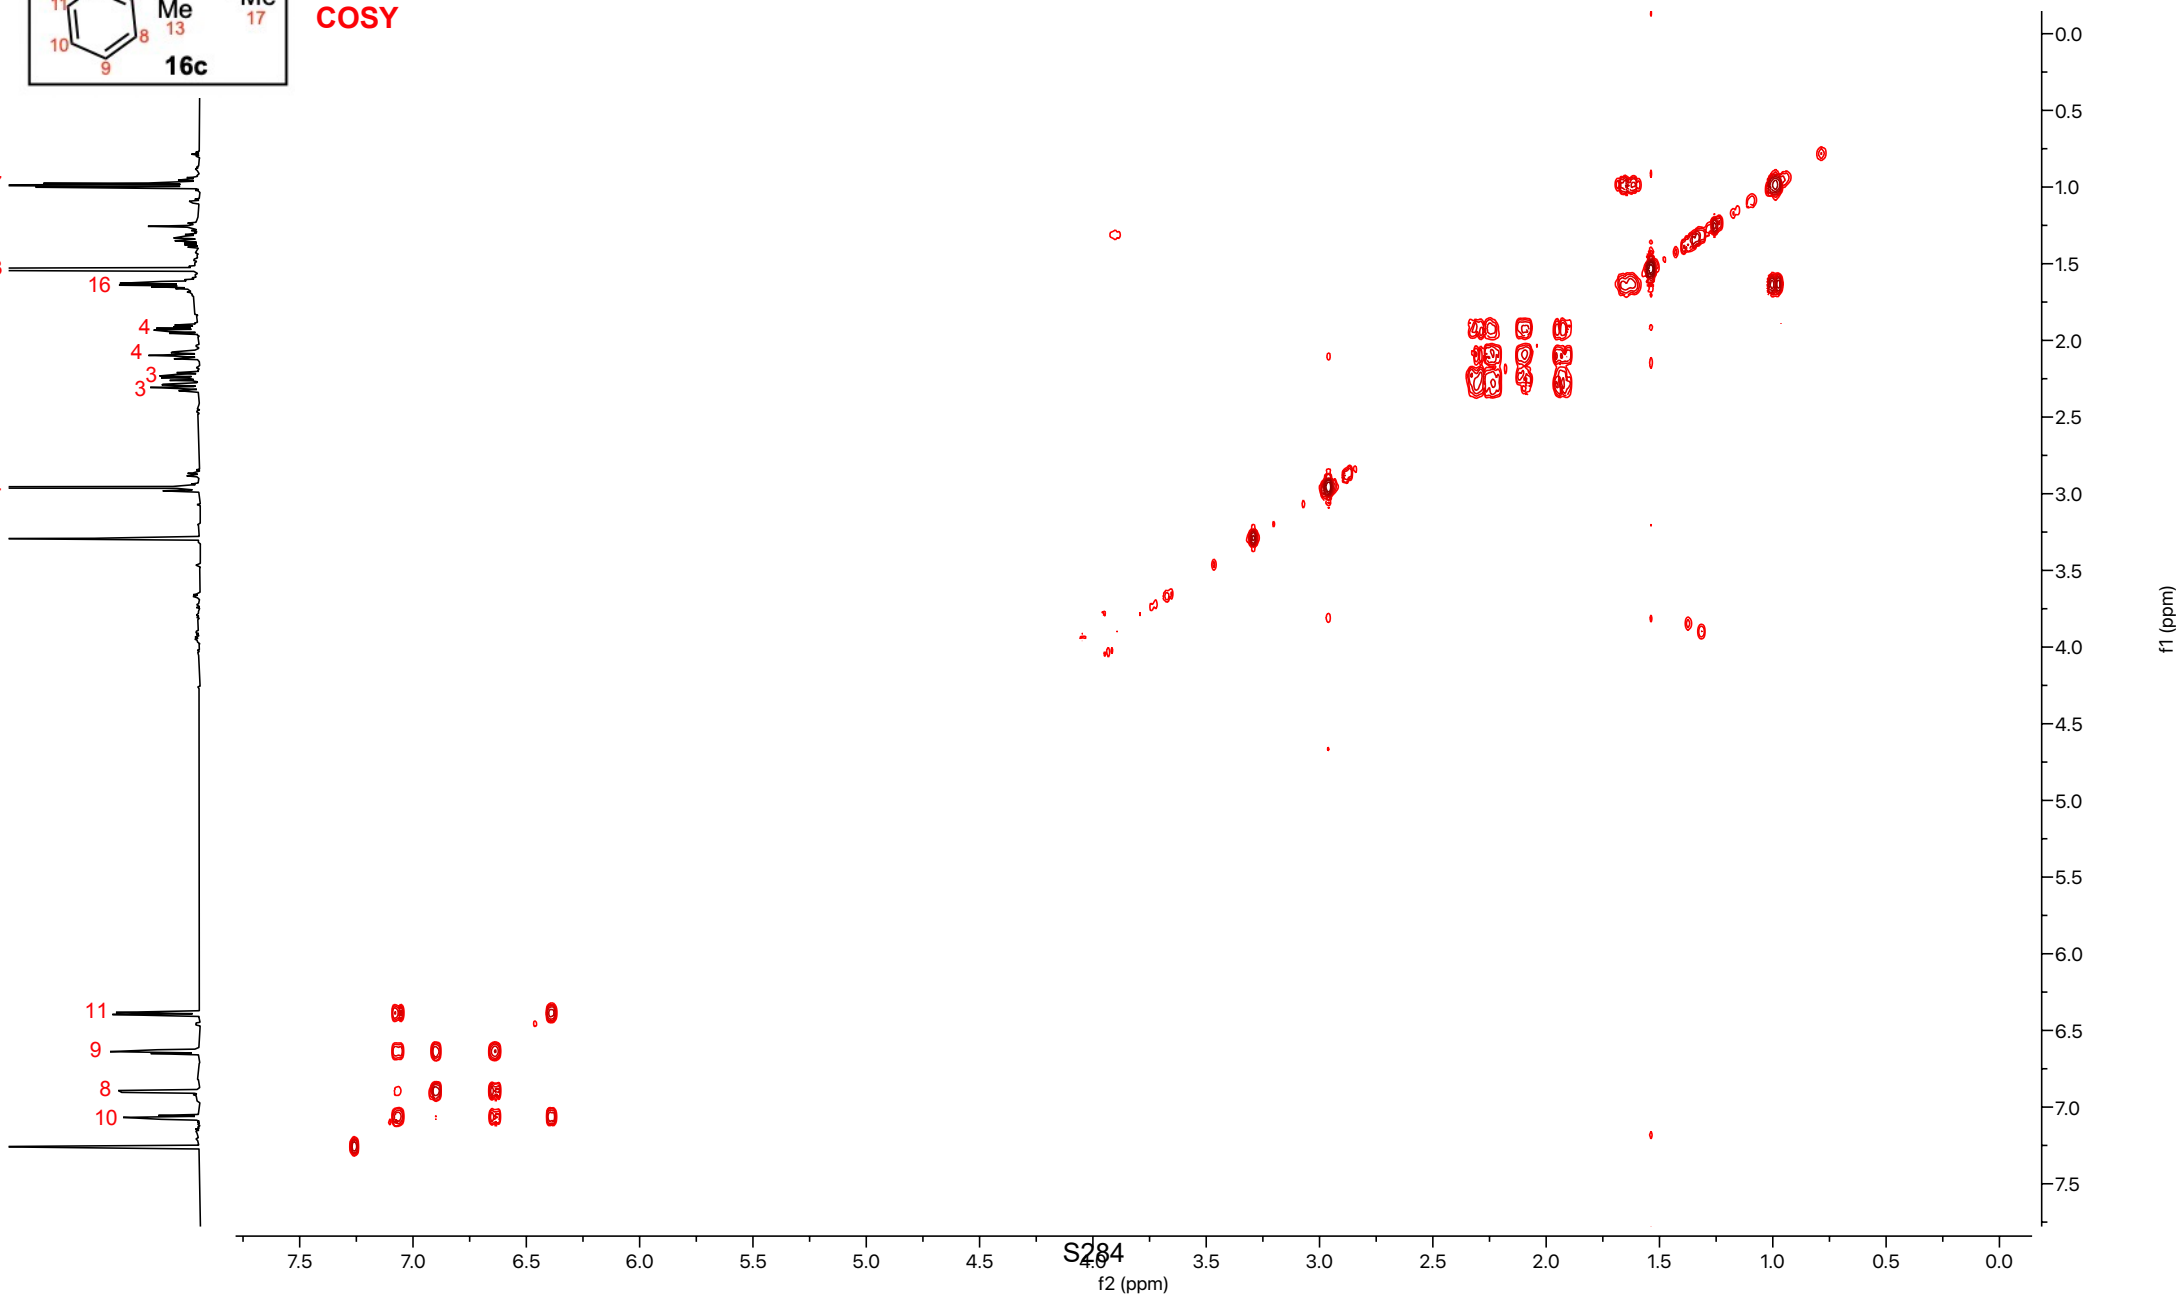

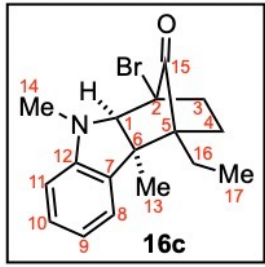

**HSQC**

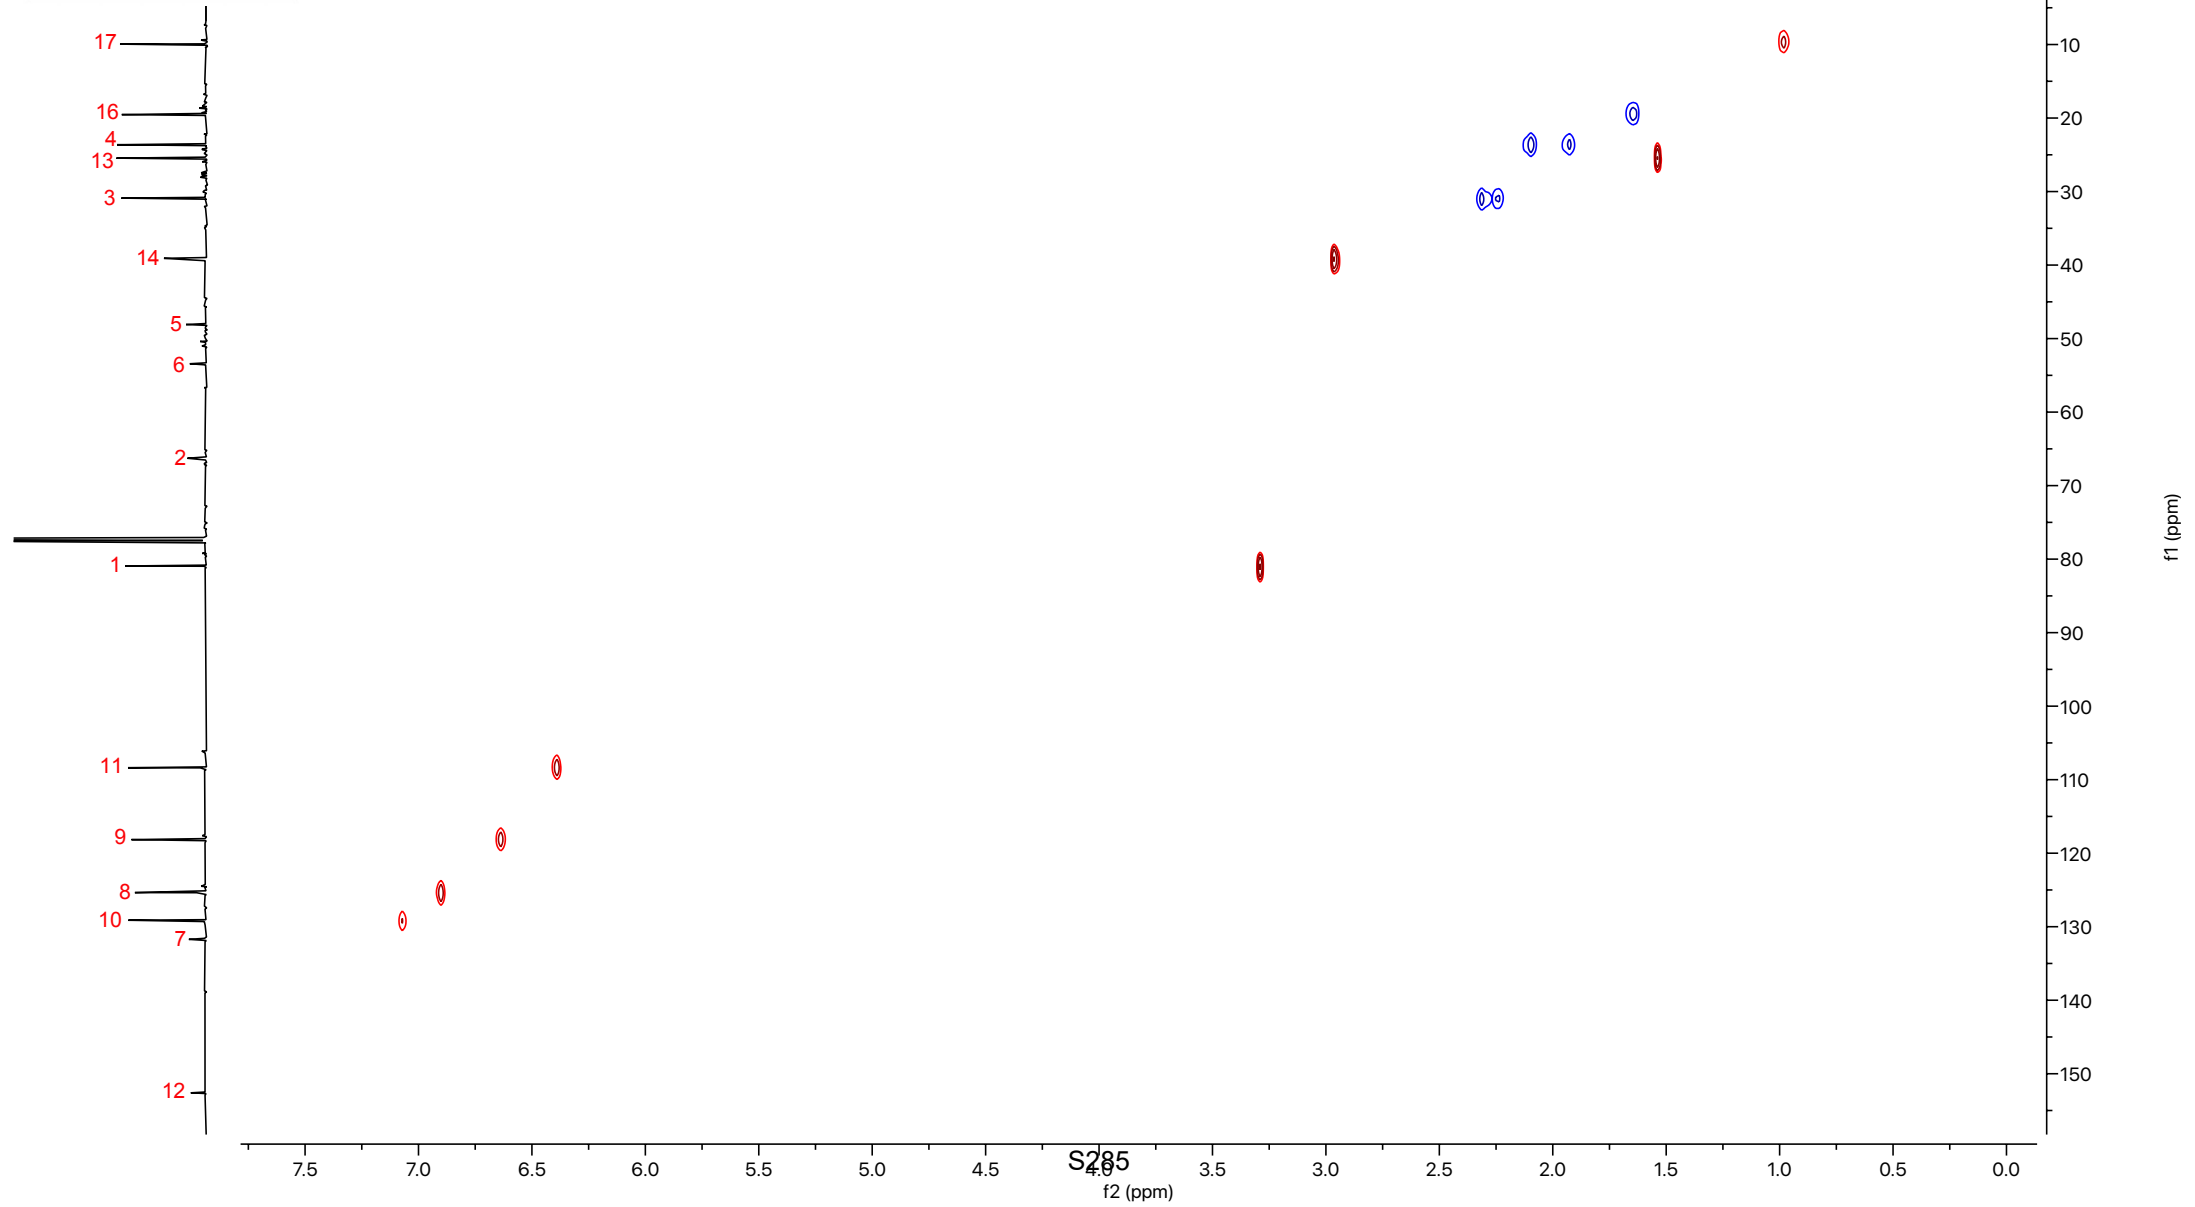

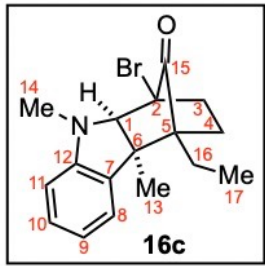

**HMBC**

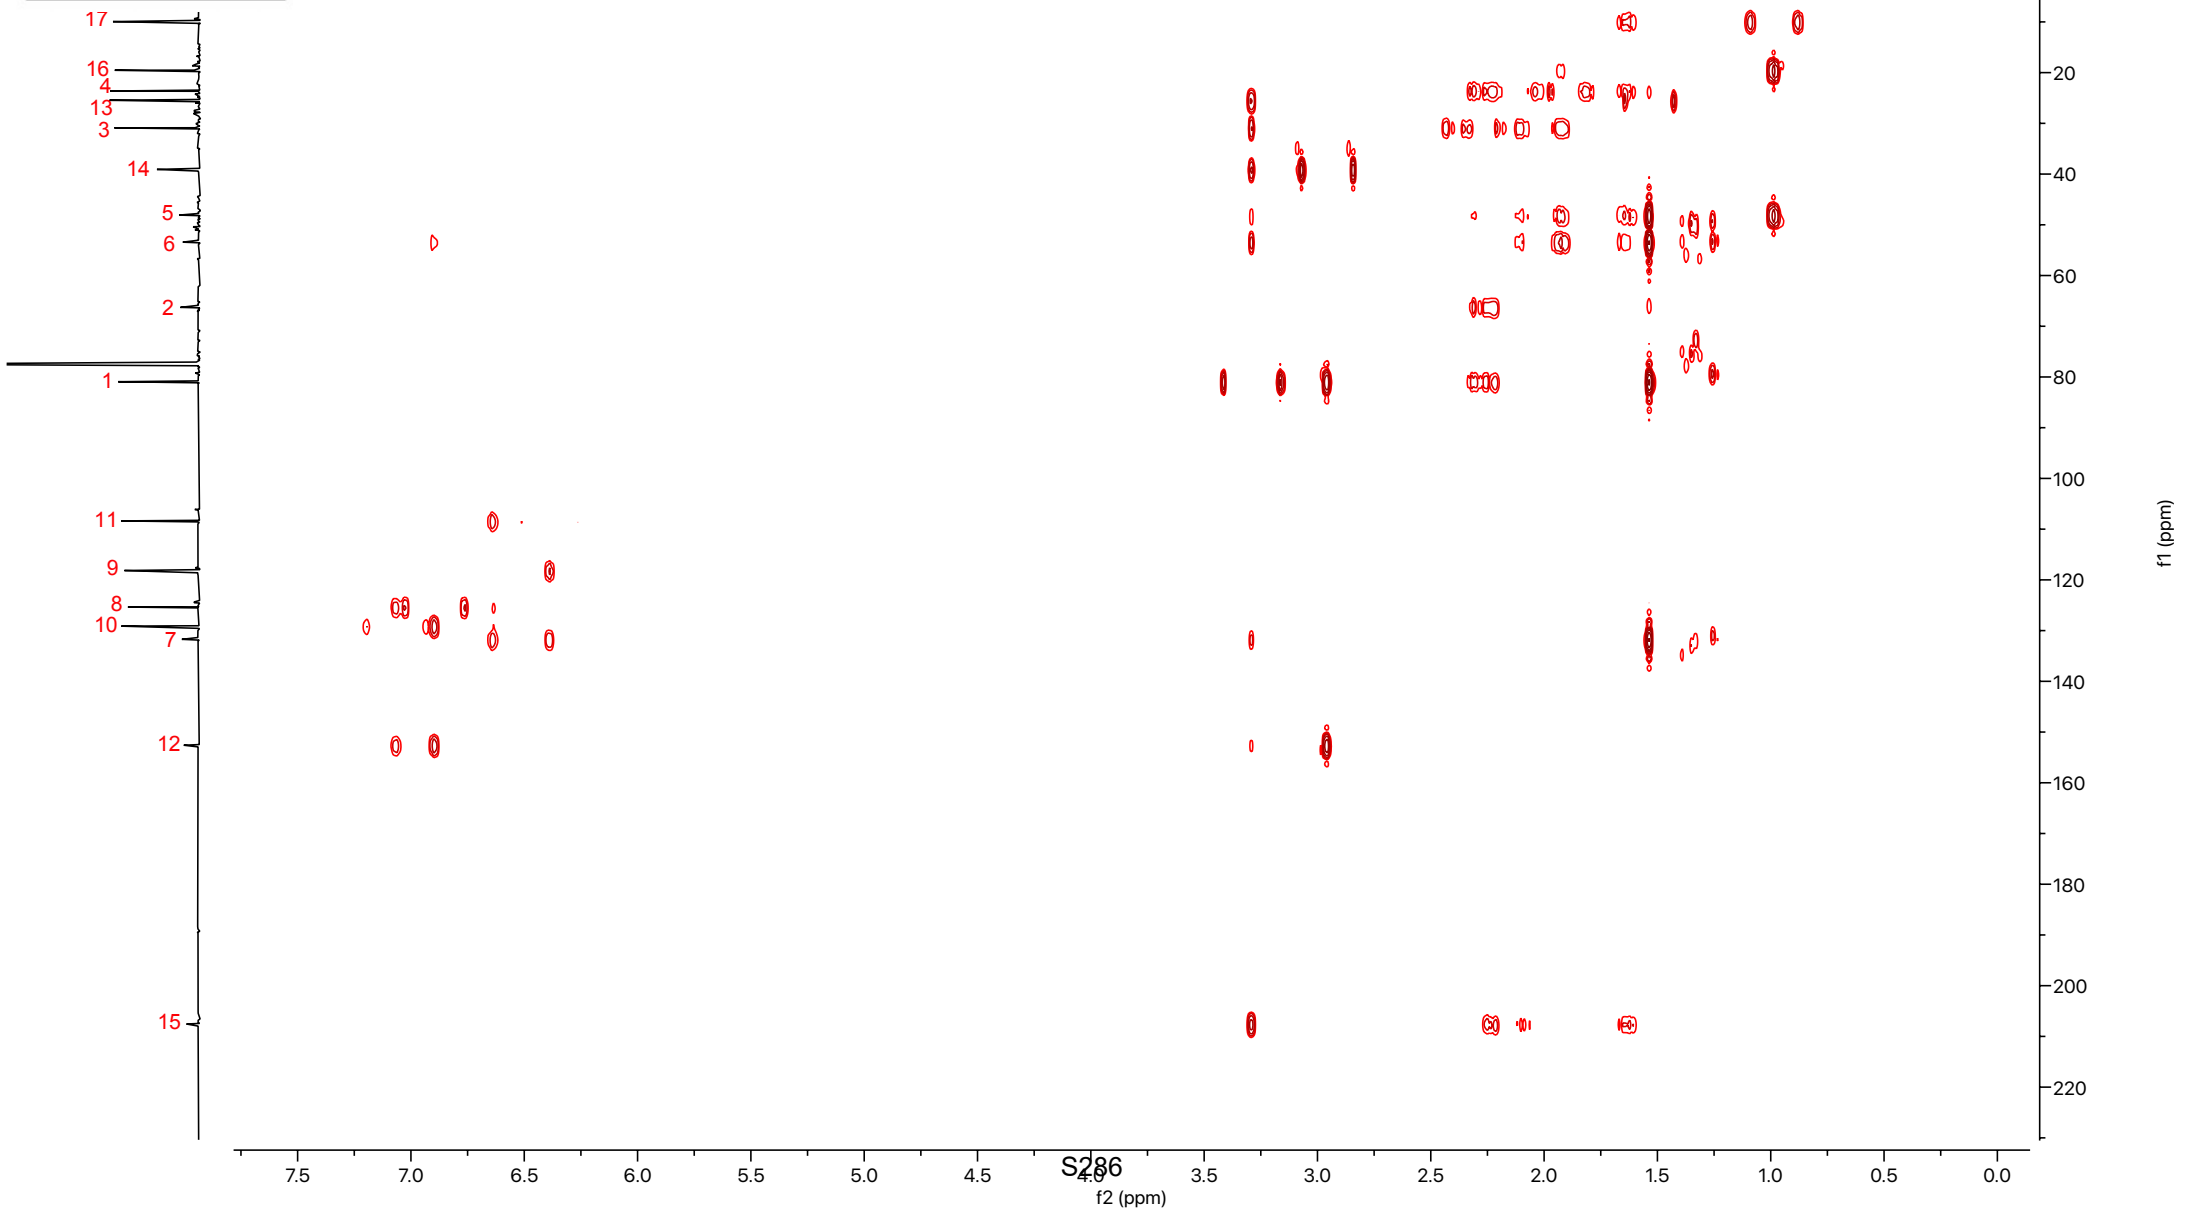

7.27  
7.27  
7.27  
7.26  
7.26  
7.25  
7.25  
7.24  
7.24  
7.23  
7.23  
7.22  
7.22  
7.22  
7.21  
7.20  
7.15  
7.15  
7.14  
7.14  
7.12  
7.12  
6.65  
6.64  
6.63  
6.60  
6.60  
6.59  
6.59  
6.58  
6.57  
6.45  
6.44

3.69  
3.69

3.36  
3.33

2.97  
2.72  
2.70  
2.43  
2.42  
2.41  
2.40  
2.40  
2.40  
2.39  
2.38  
1.80  
1.80  
1.79  
1.79  
1.78  
1.78  
1.77  
1.77  
1.76  
1.76  
1.75  
1.75  
1.52  
1.51  
1.50  
1.49  
1.48  
1.47  
1.47  
1.46  
1.45  
1.45  
1.44  
1.44  
1.43  
1.43  
1.42  
1.42  
1.38

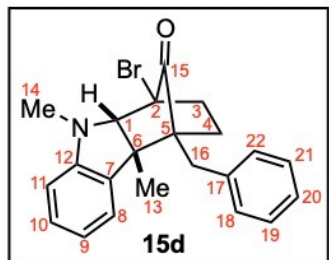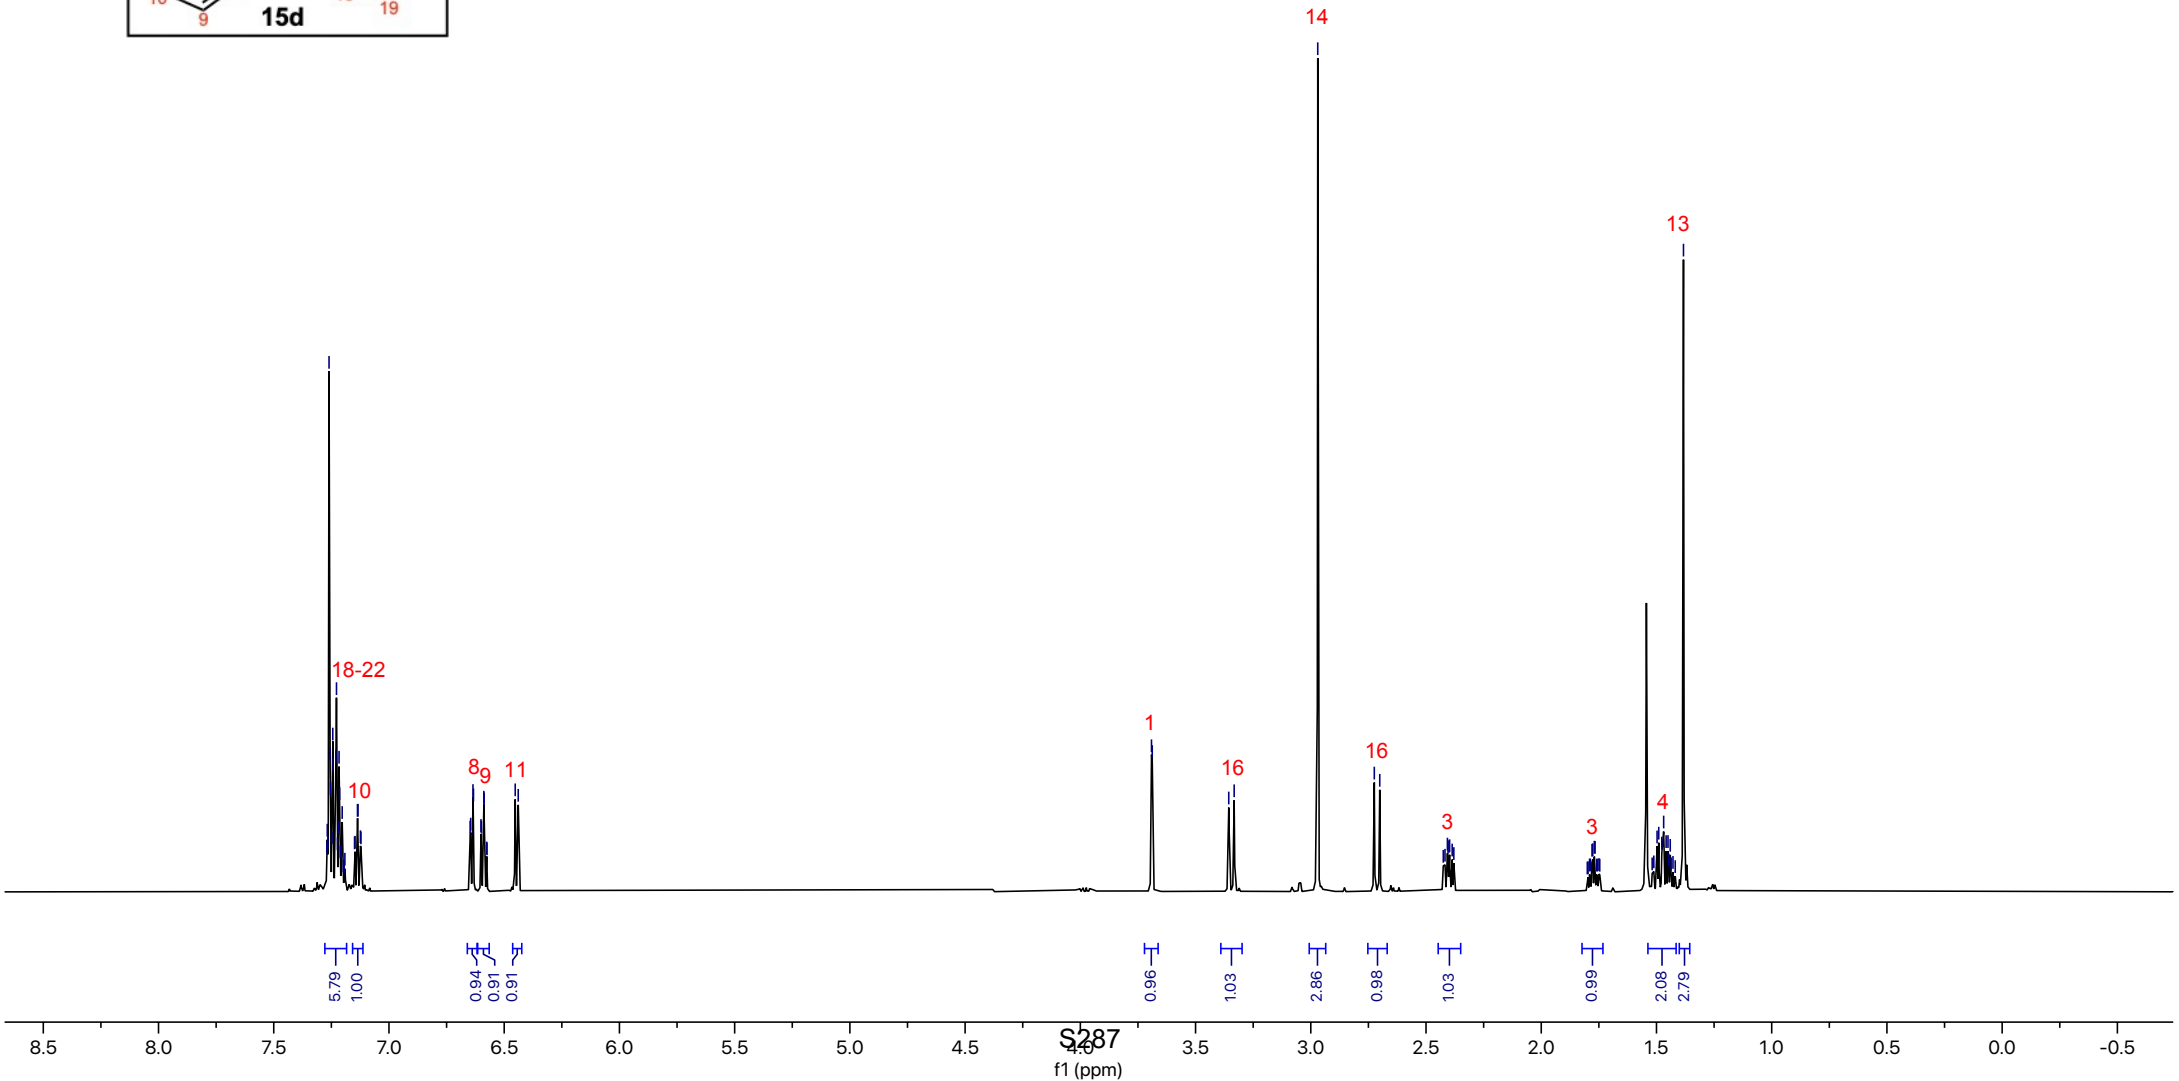



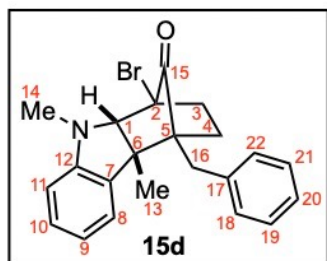

— 207.50

— 153.64

— 137.58

— 130.92

— 130.71

— 129.26

— 128.76

— 126.84

— 124.34

— 117.74

— 106.11

— 79.13

— 77.57

— 63.53

— 53.22

— 49.94

— 34.84

— 32.68

— 27.49

— 25.92

— 25.54

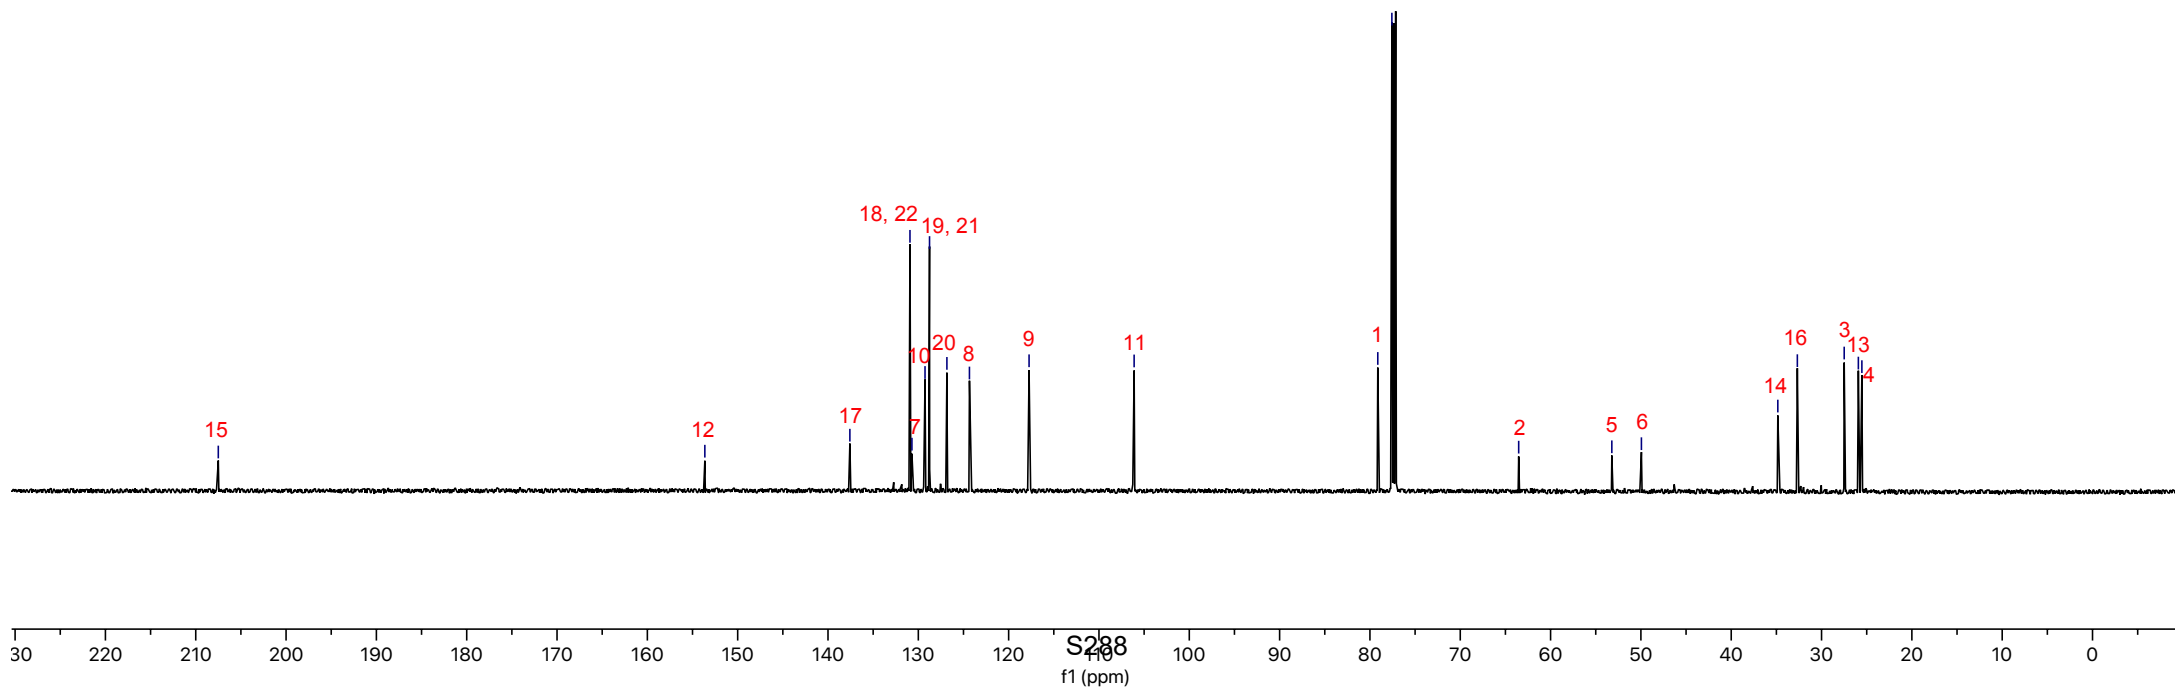

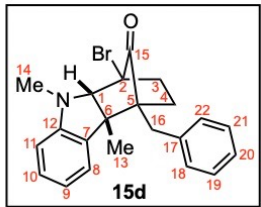

**COSY**

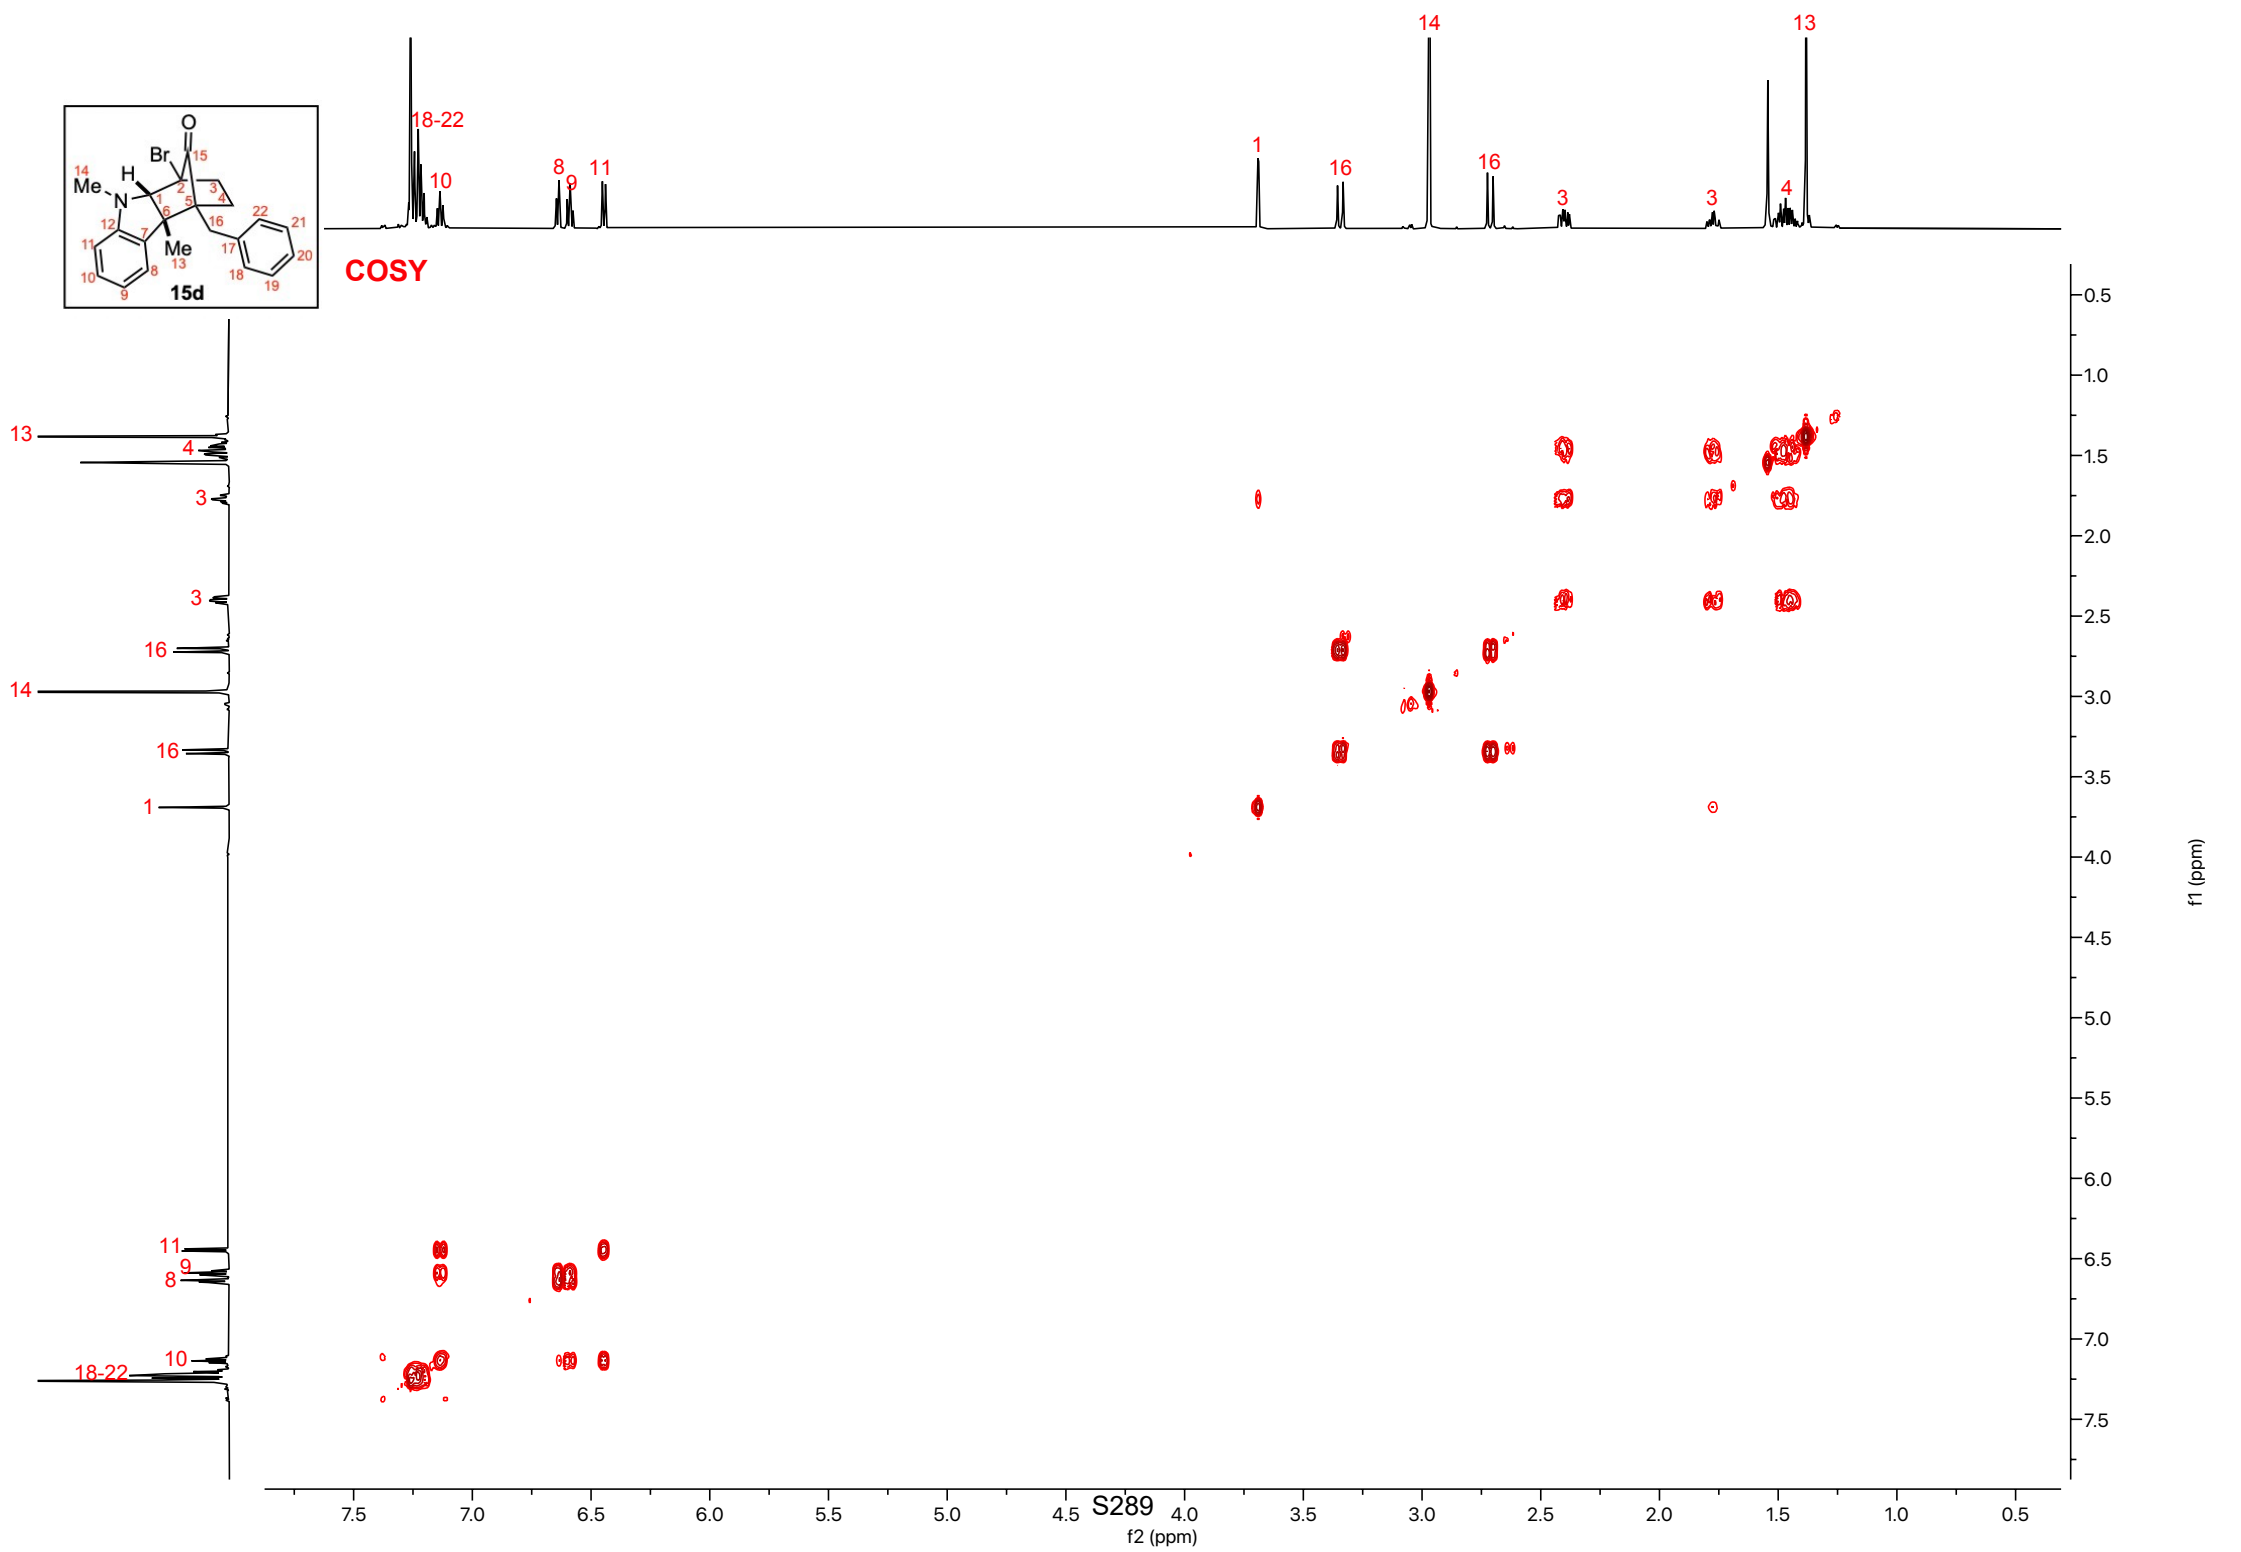

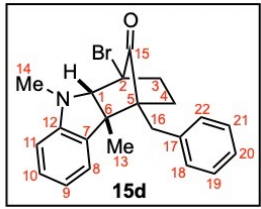

HSQC

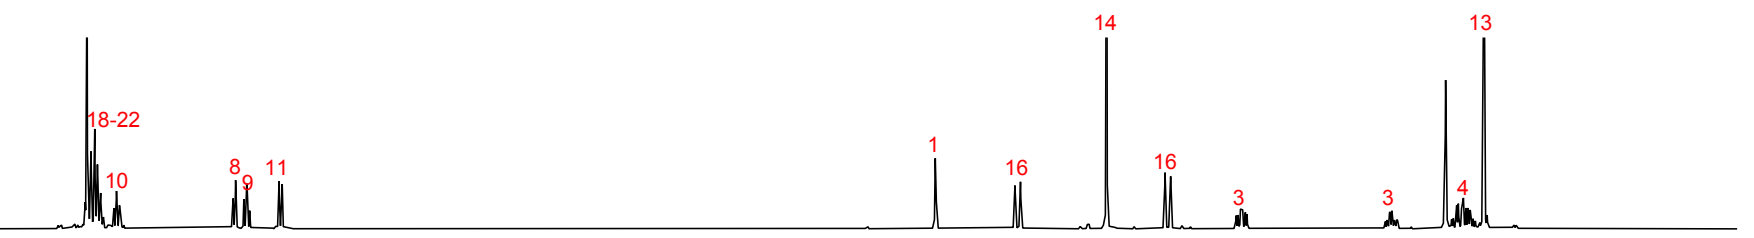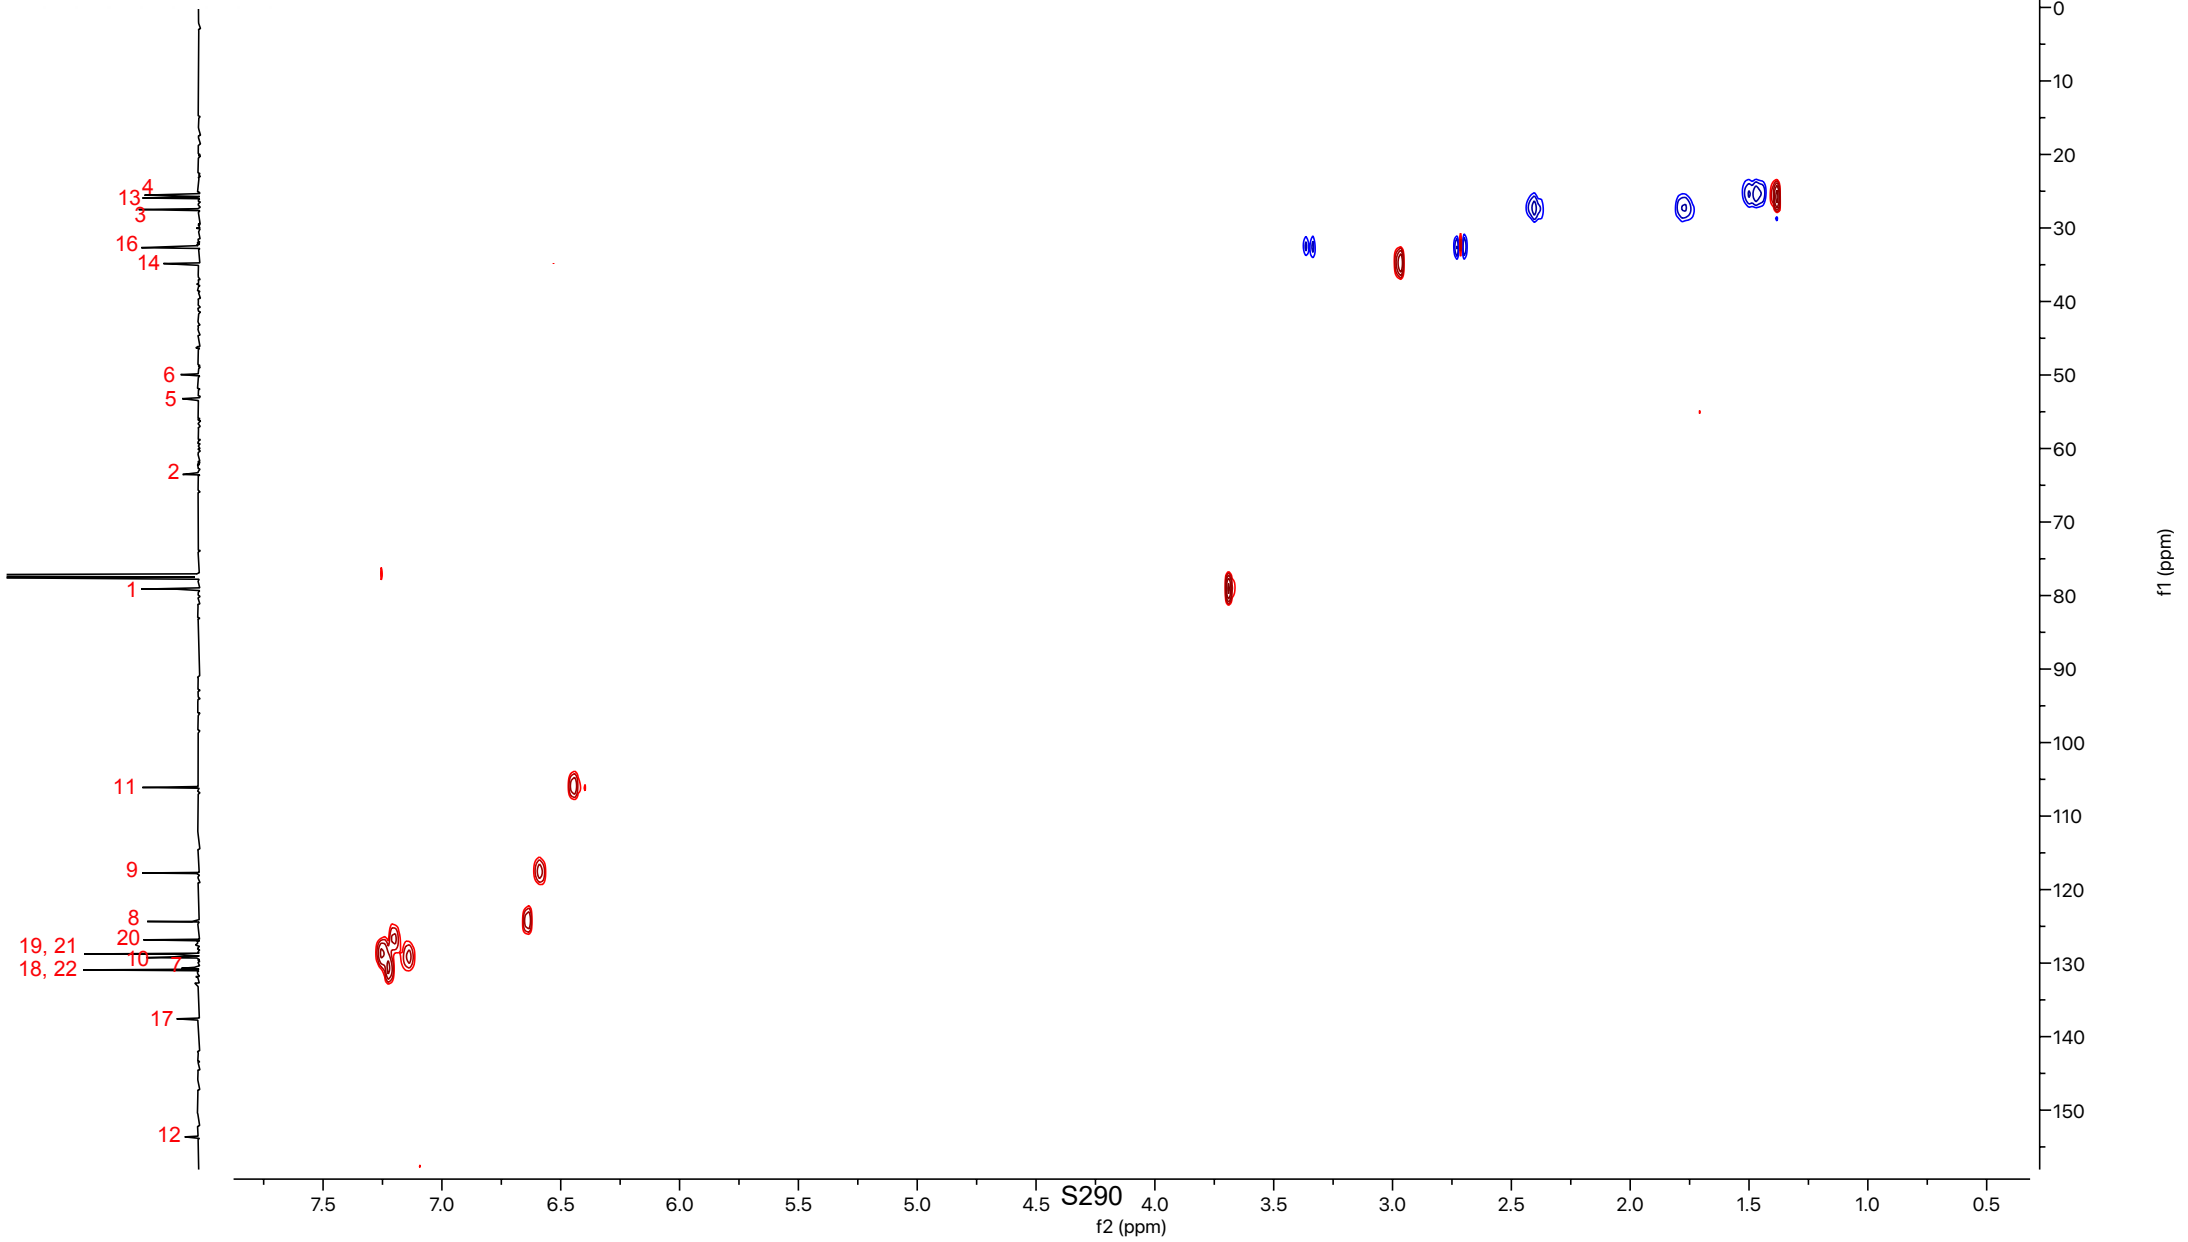

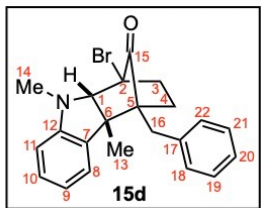

**HMBC**

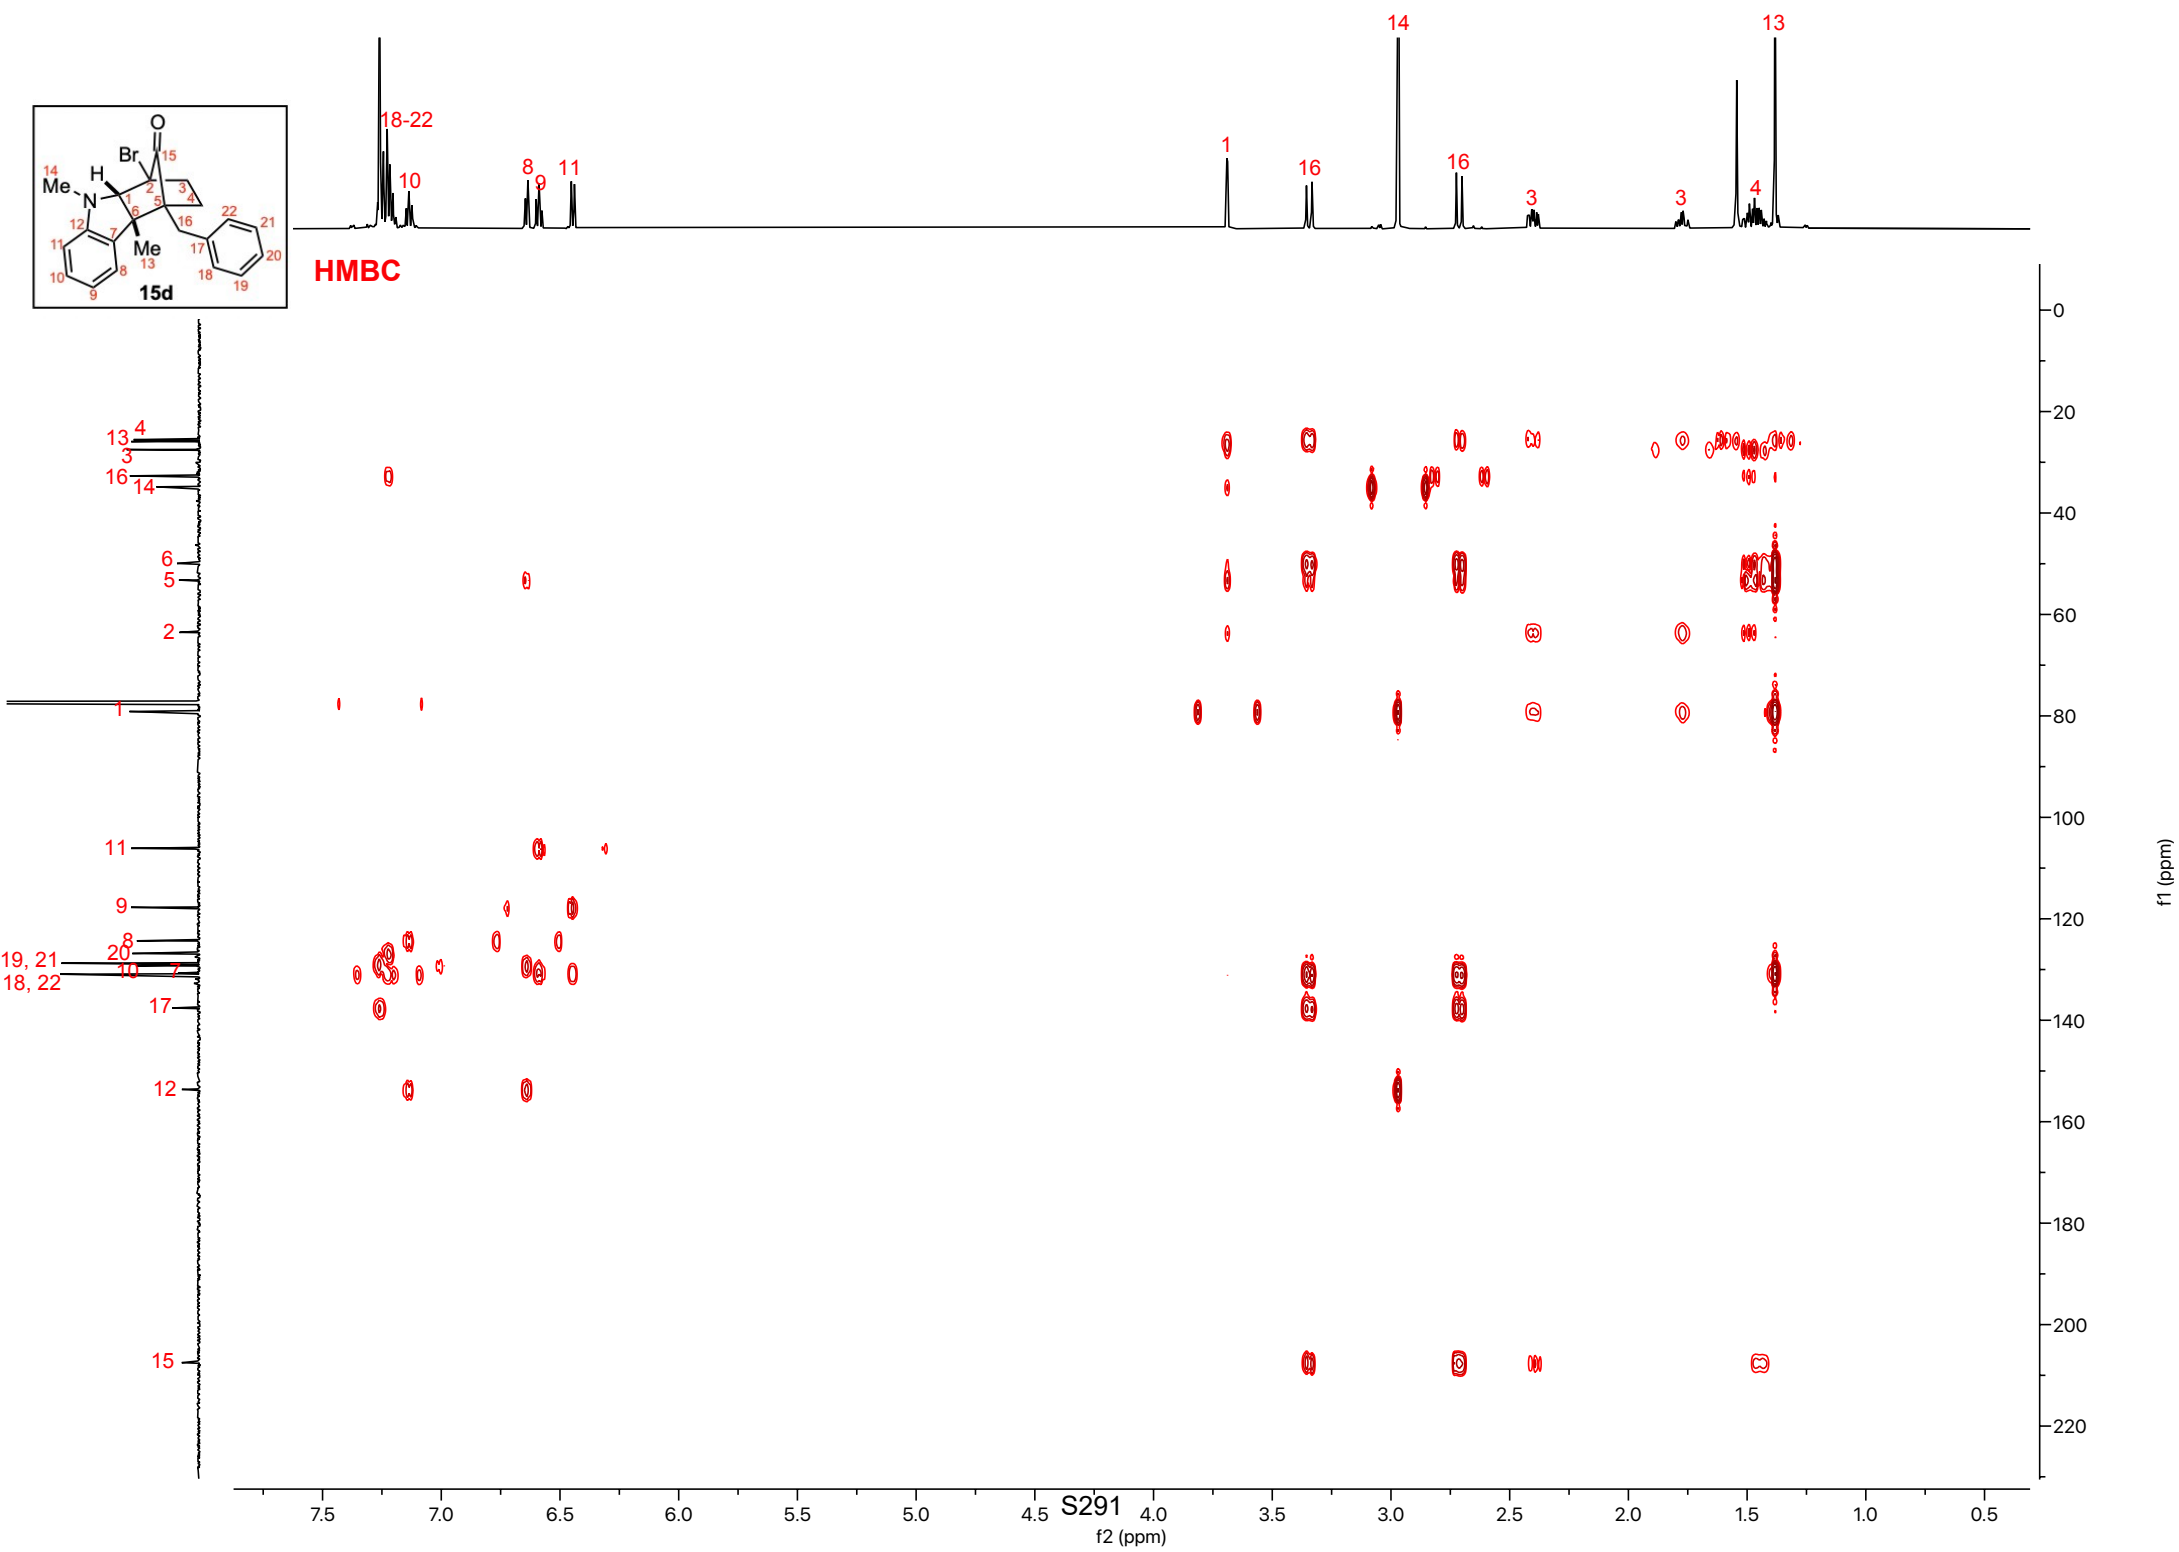

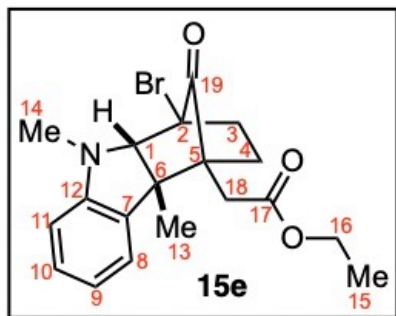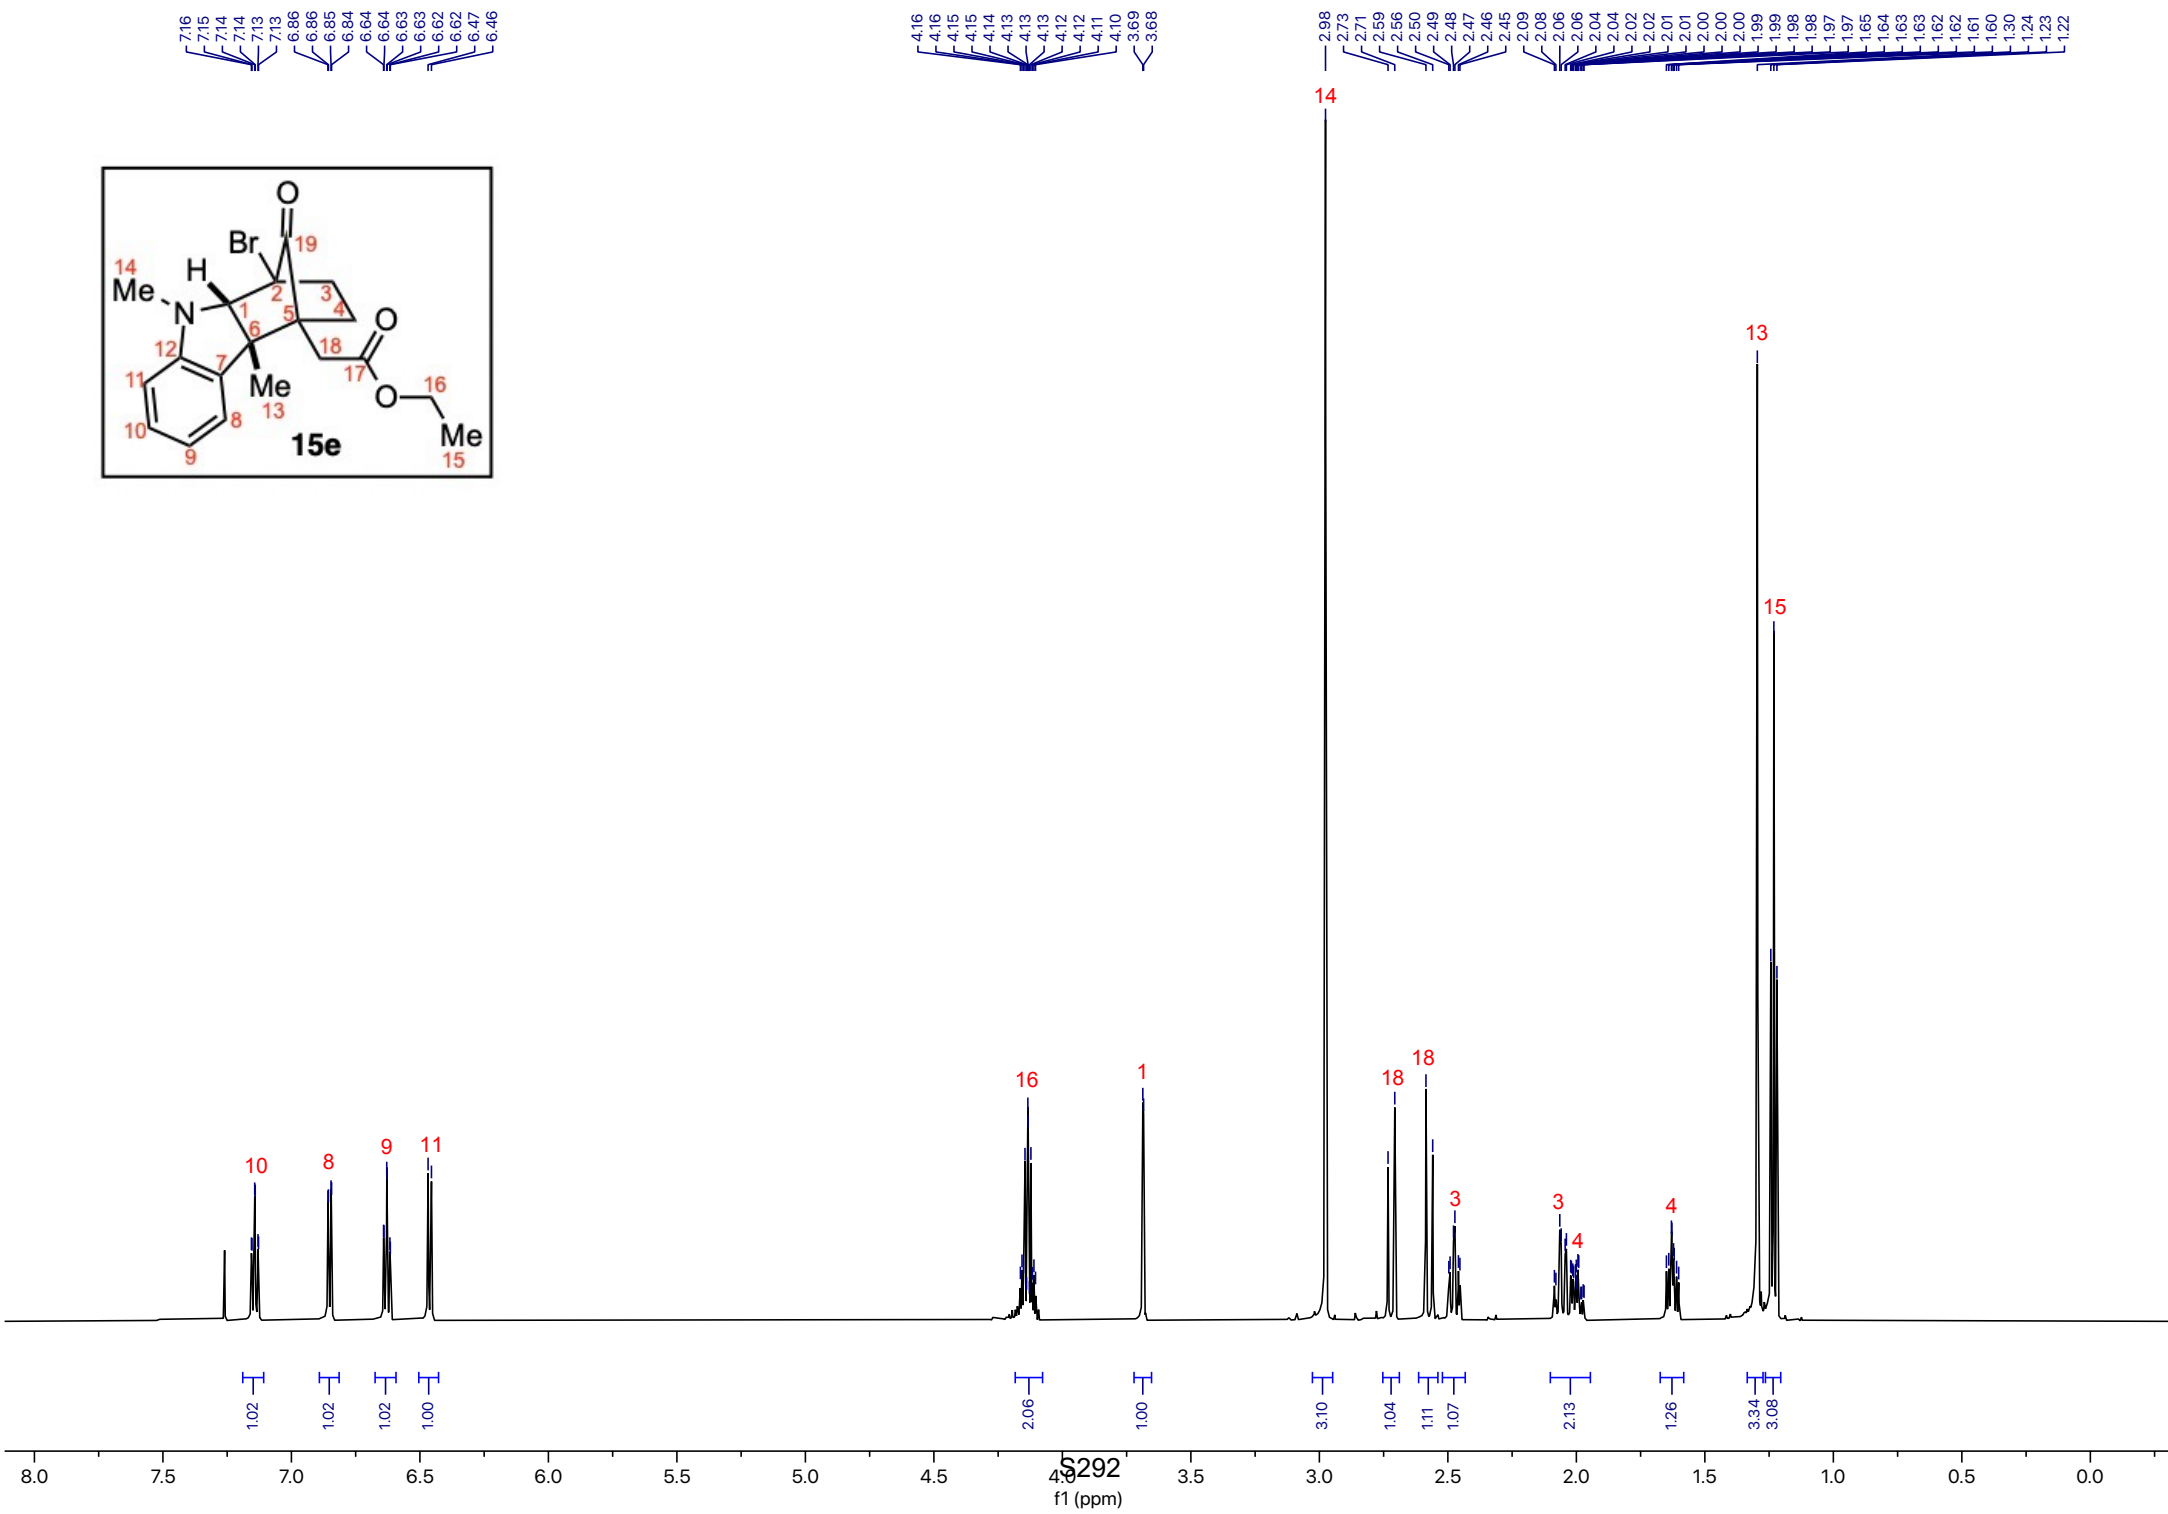

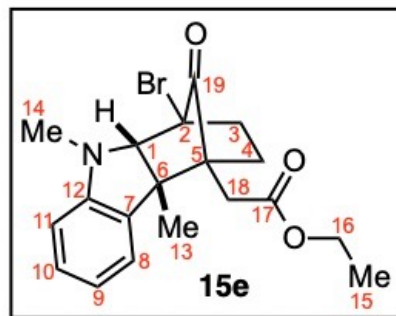

— 205.57

— 171.06

— 153.59

— 130.10  
— 129.42

— 124.49

— 117.80

— 106.27

— 79.22

— 62.88  
— 61.05

— 52.94

— 47.28

— 34.97  
— 31.58

— 27.64  
— 26.53

— 25.88

— 14.43

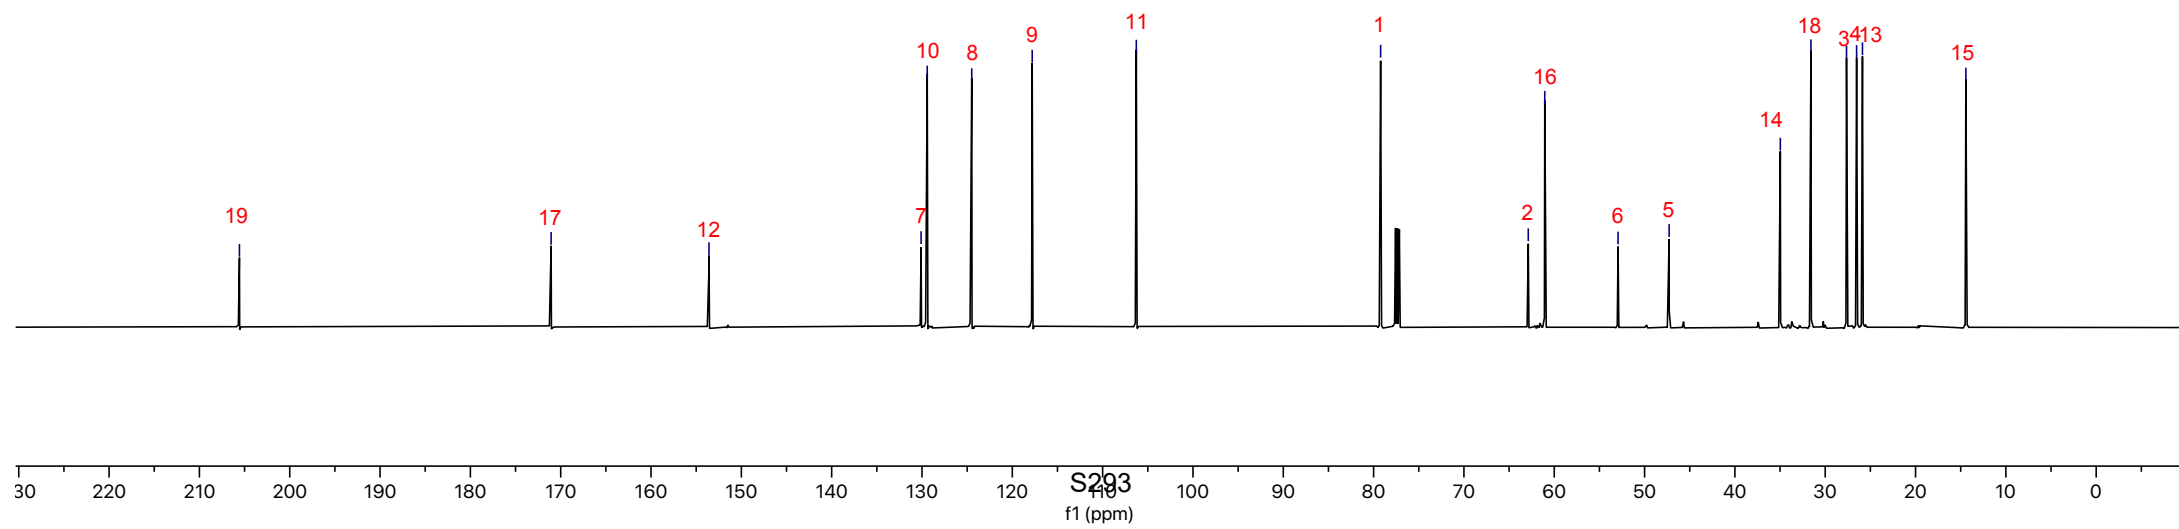

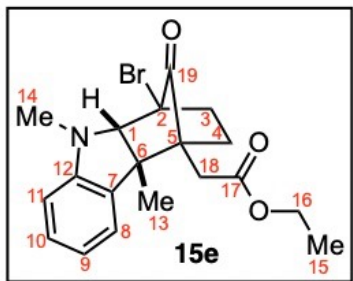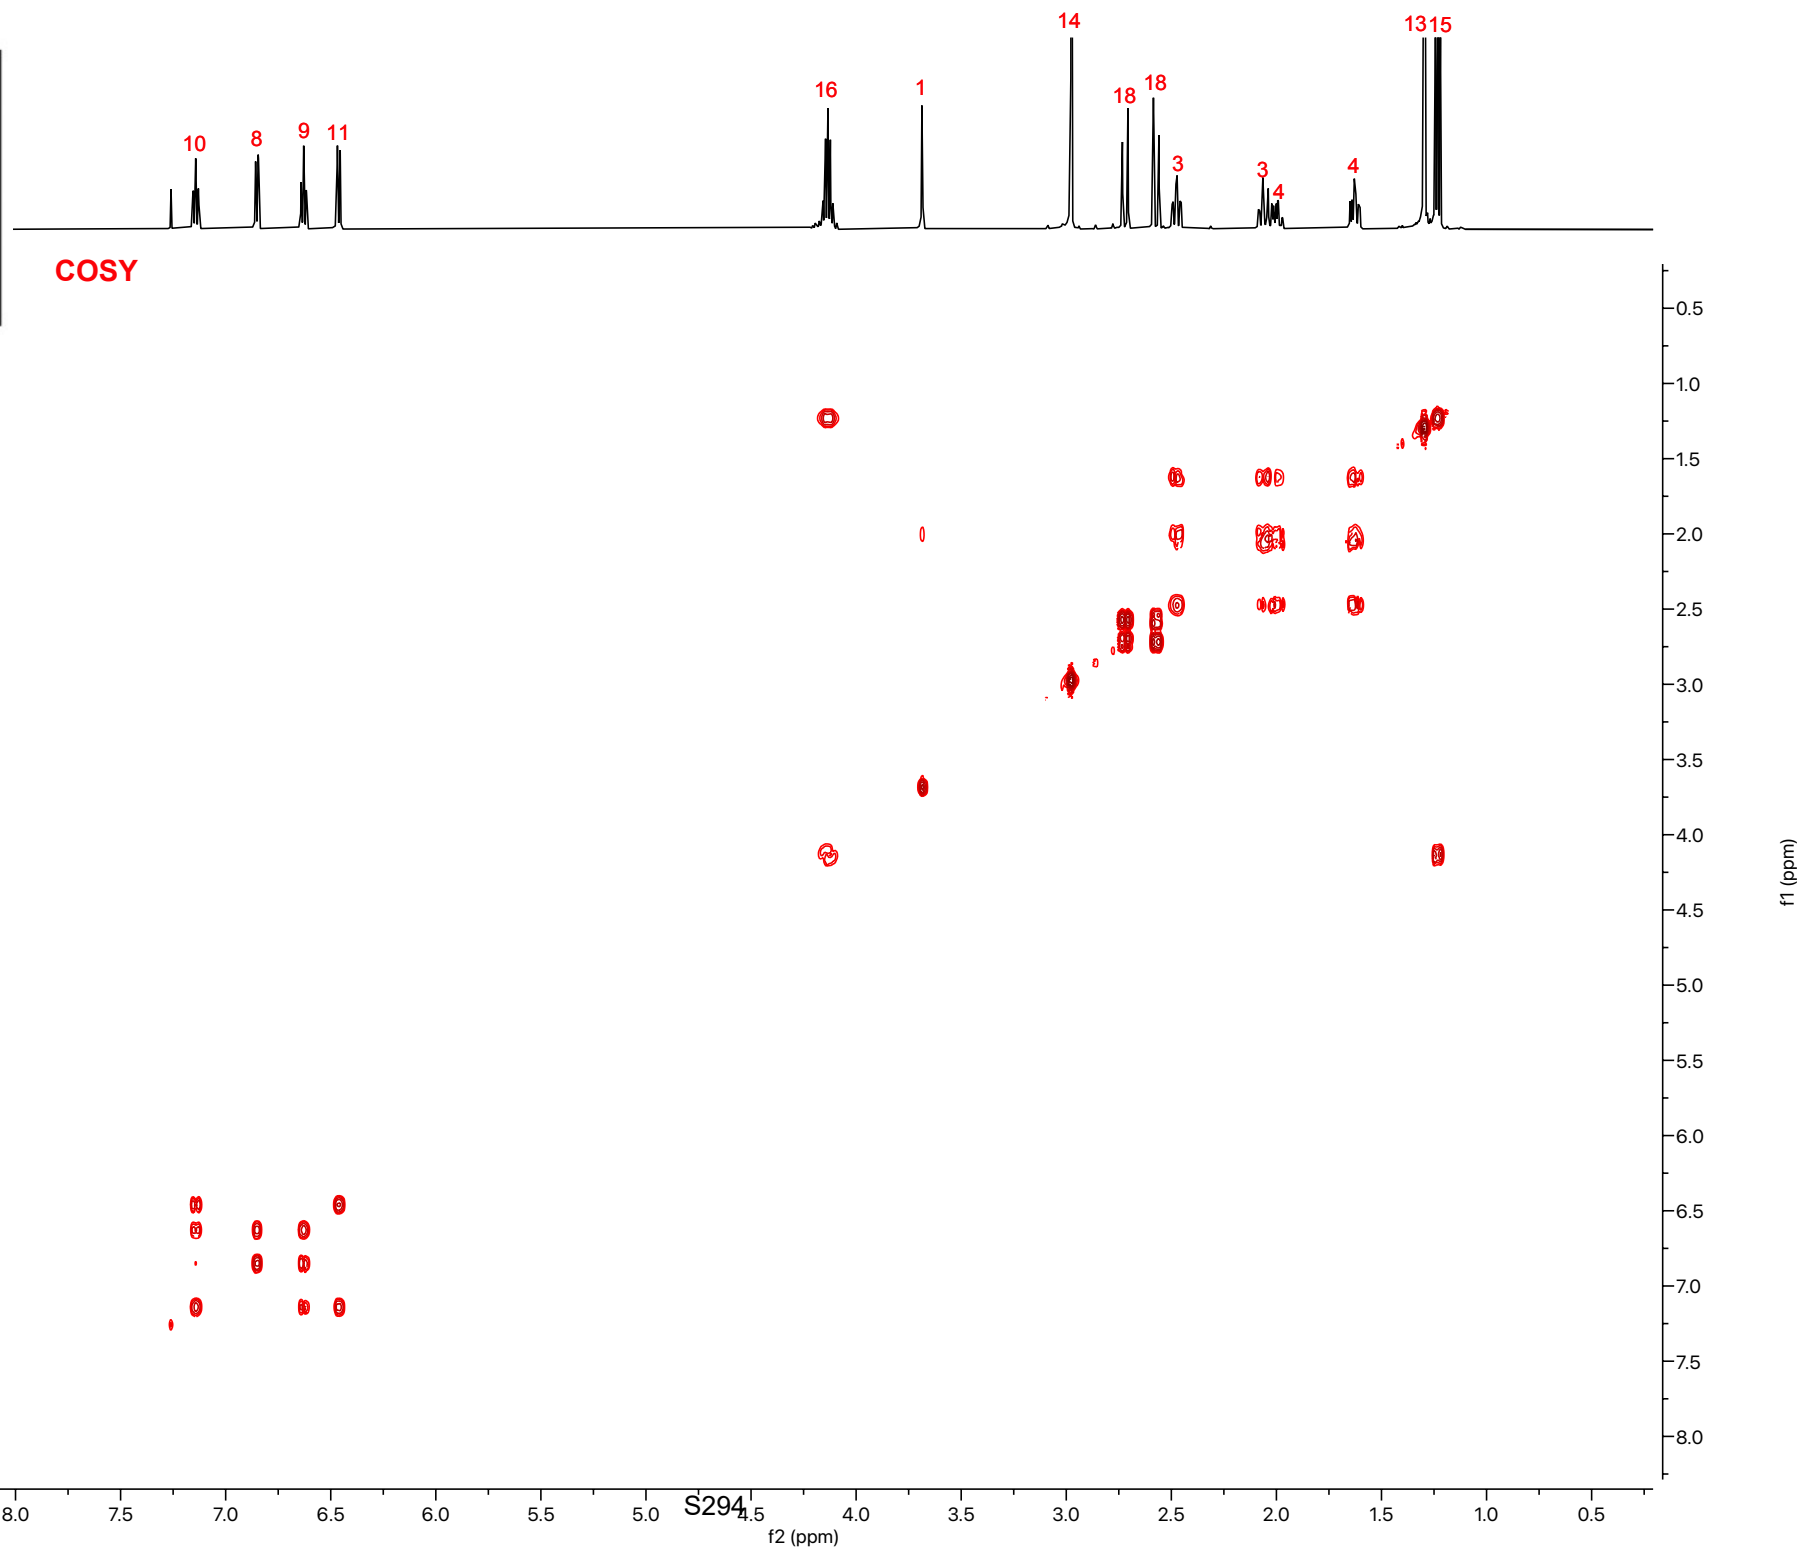

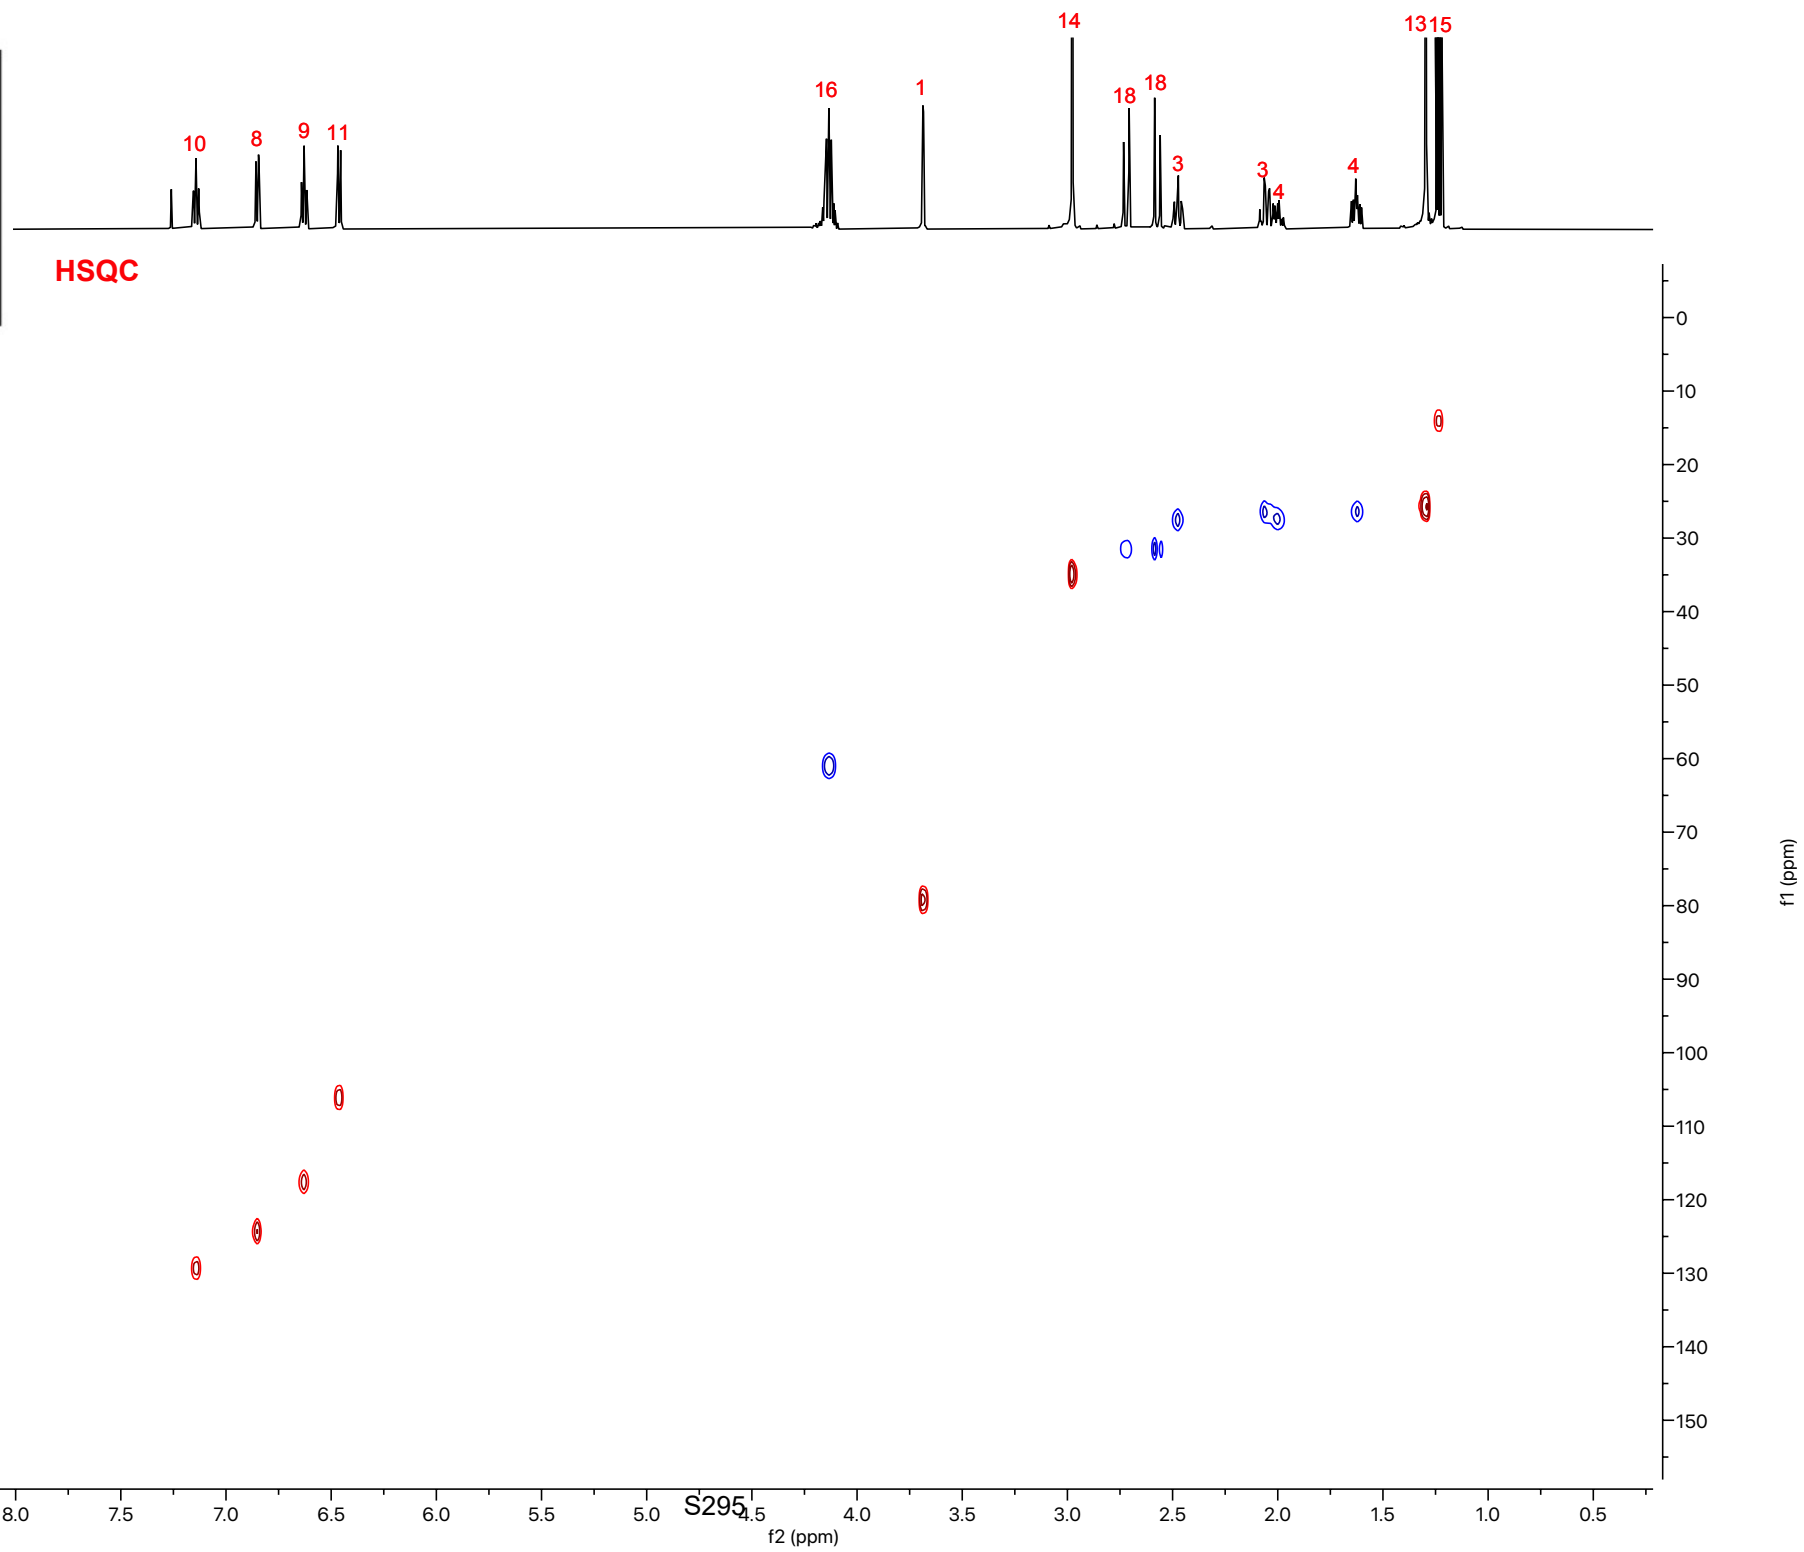



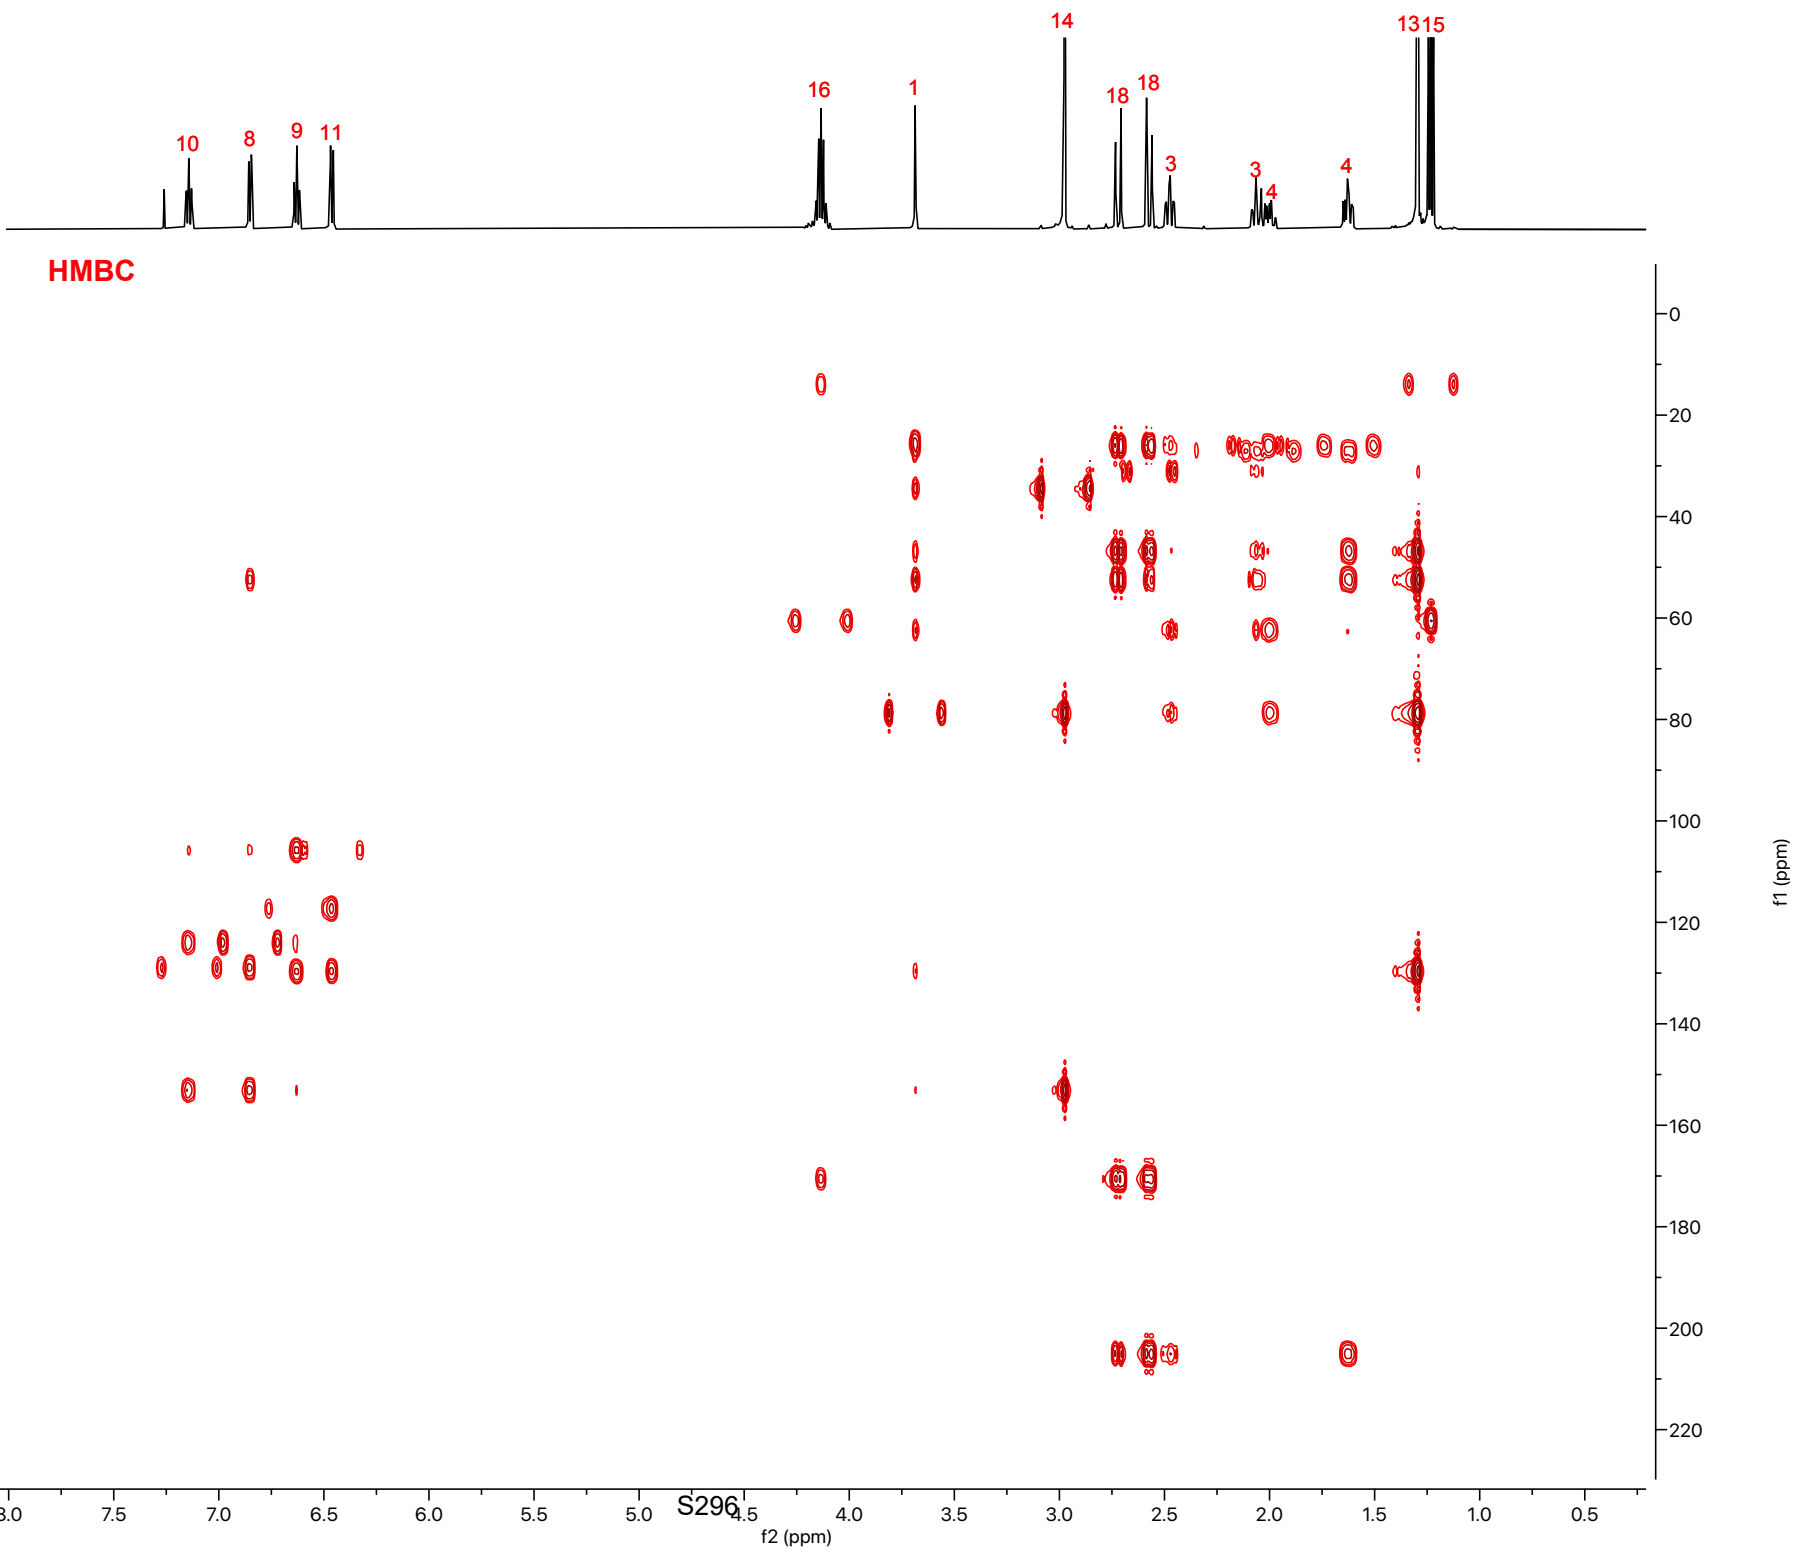

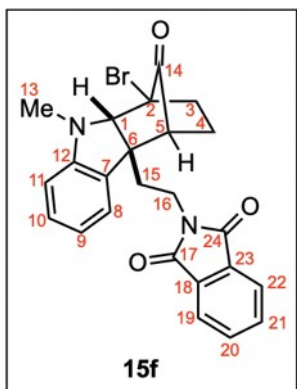

7.69  
7.68  
7.68  
7.67  
7.64  
7.63  
7.63  
7.62  
6.85  
6.84  
6.84  
6.83  
6.83  
6.81  
6.81  
6.80  
6.80  
6.80  
6.41  
6.39  
6.39  
6.38  
6.38  
6.38  
6.29  
6.28

4.10  
4.10  
3.61  
3.60  
3.60  
3.59  
3.58  
3.57  
3.56  
3.52  
3.51  
3.51  
3.50  
3.50  
3.49  
3.48  
3.48  
3.03  
2.48  
2.47  
2.46  
2.46  
2.45  
2.43  
2.40  
2.39  
2.38  
2.38  
2.37  
2.37  
2.36  
2.35  
2.06  
2.05  
1.90  
1.90  
1.89  
1.89  
1.88  
1.88  
1.87  
1.87  
1.79  
1.78  
1.77  
1.77  
1.76  
1.74  
1.74  
1.74  
1.73  
1.72  
1.72  
1.71  
1.70  
1.70  
1.69  
1.49  
1.49  
1.47  
1.47  
1.46  
1.46  
1.45  
1.45

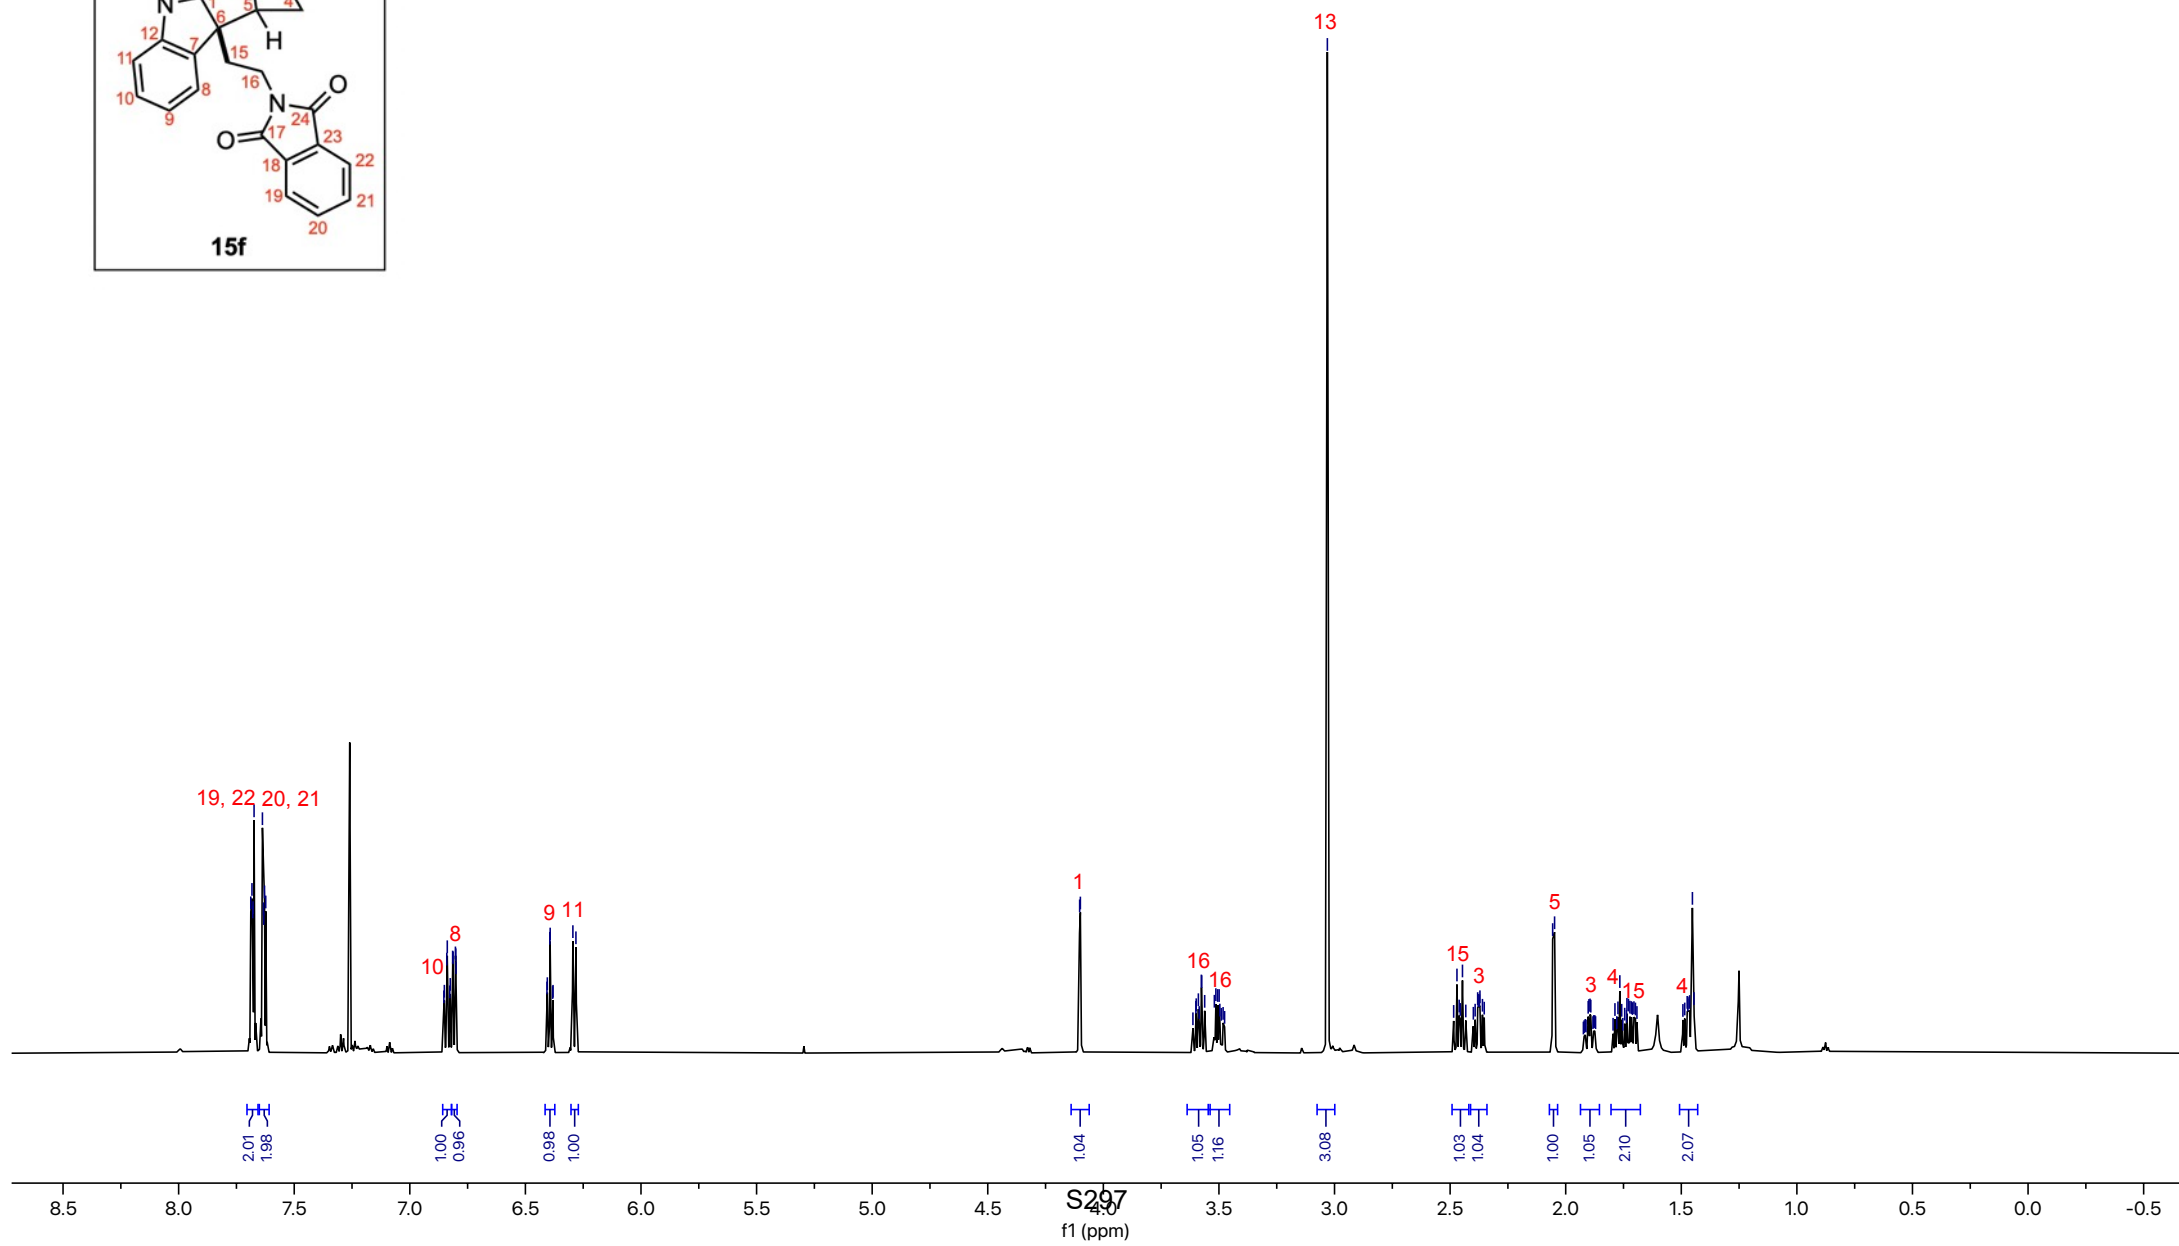



— 206.43

— 168.15

— 153.88

— 133.99

— 132.25

— 129.26

— 127.09

— 124.28

— 123.29

— 117.84

— 106.21

— 74.73

— 63.42

— 53.42

— 45.88

— 36.57

— 34.46

— 33.60

— 26.75

— 21.18

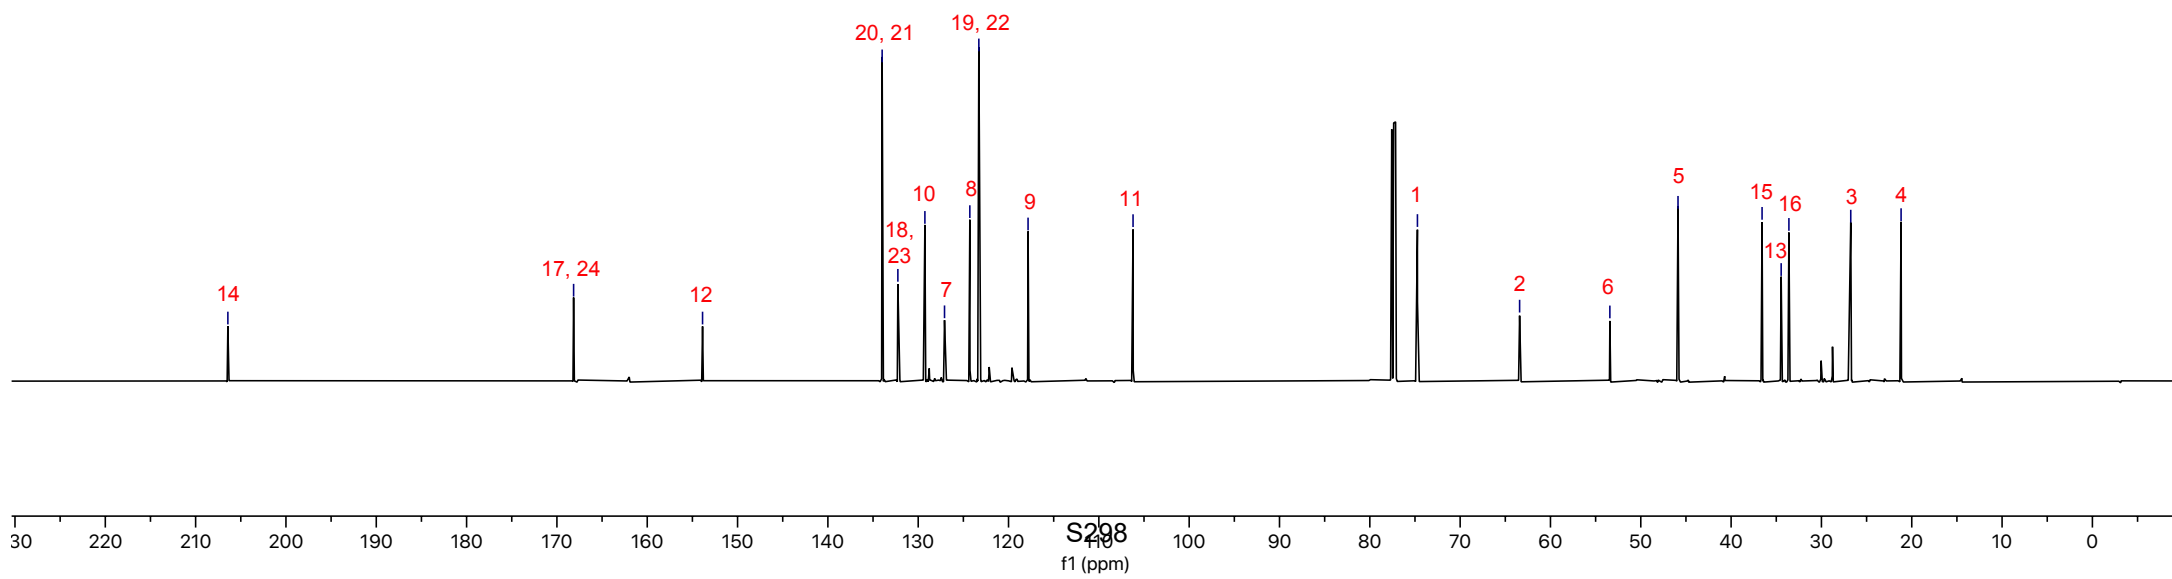

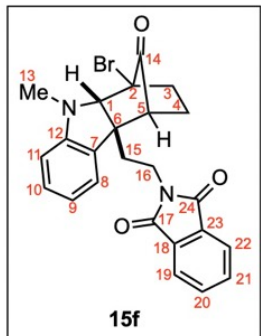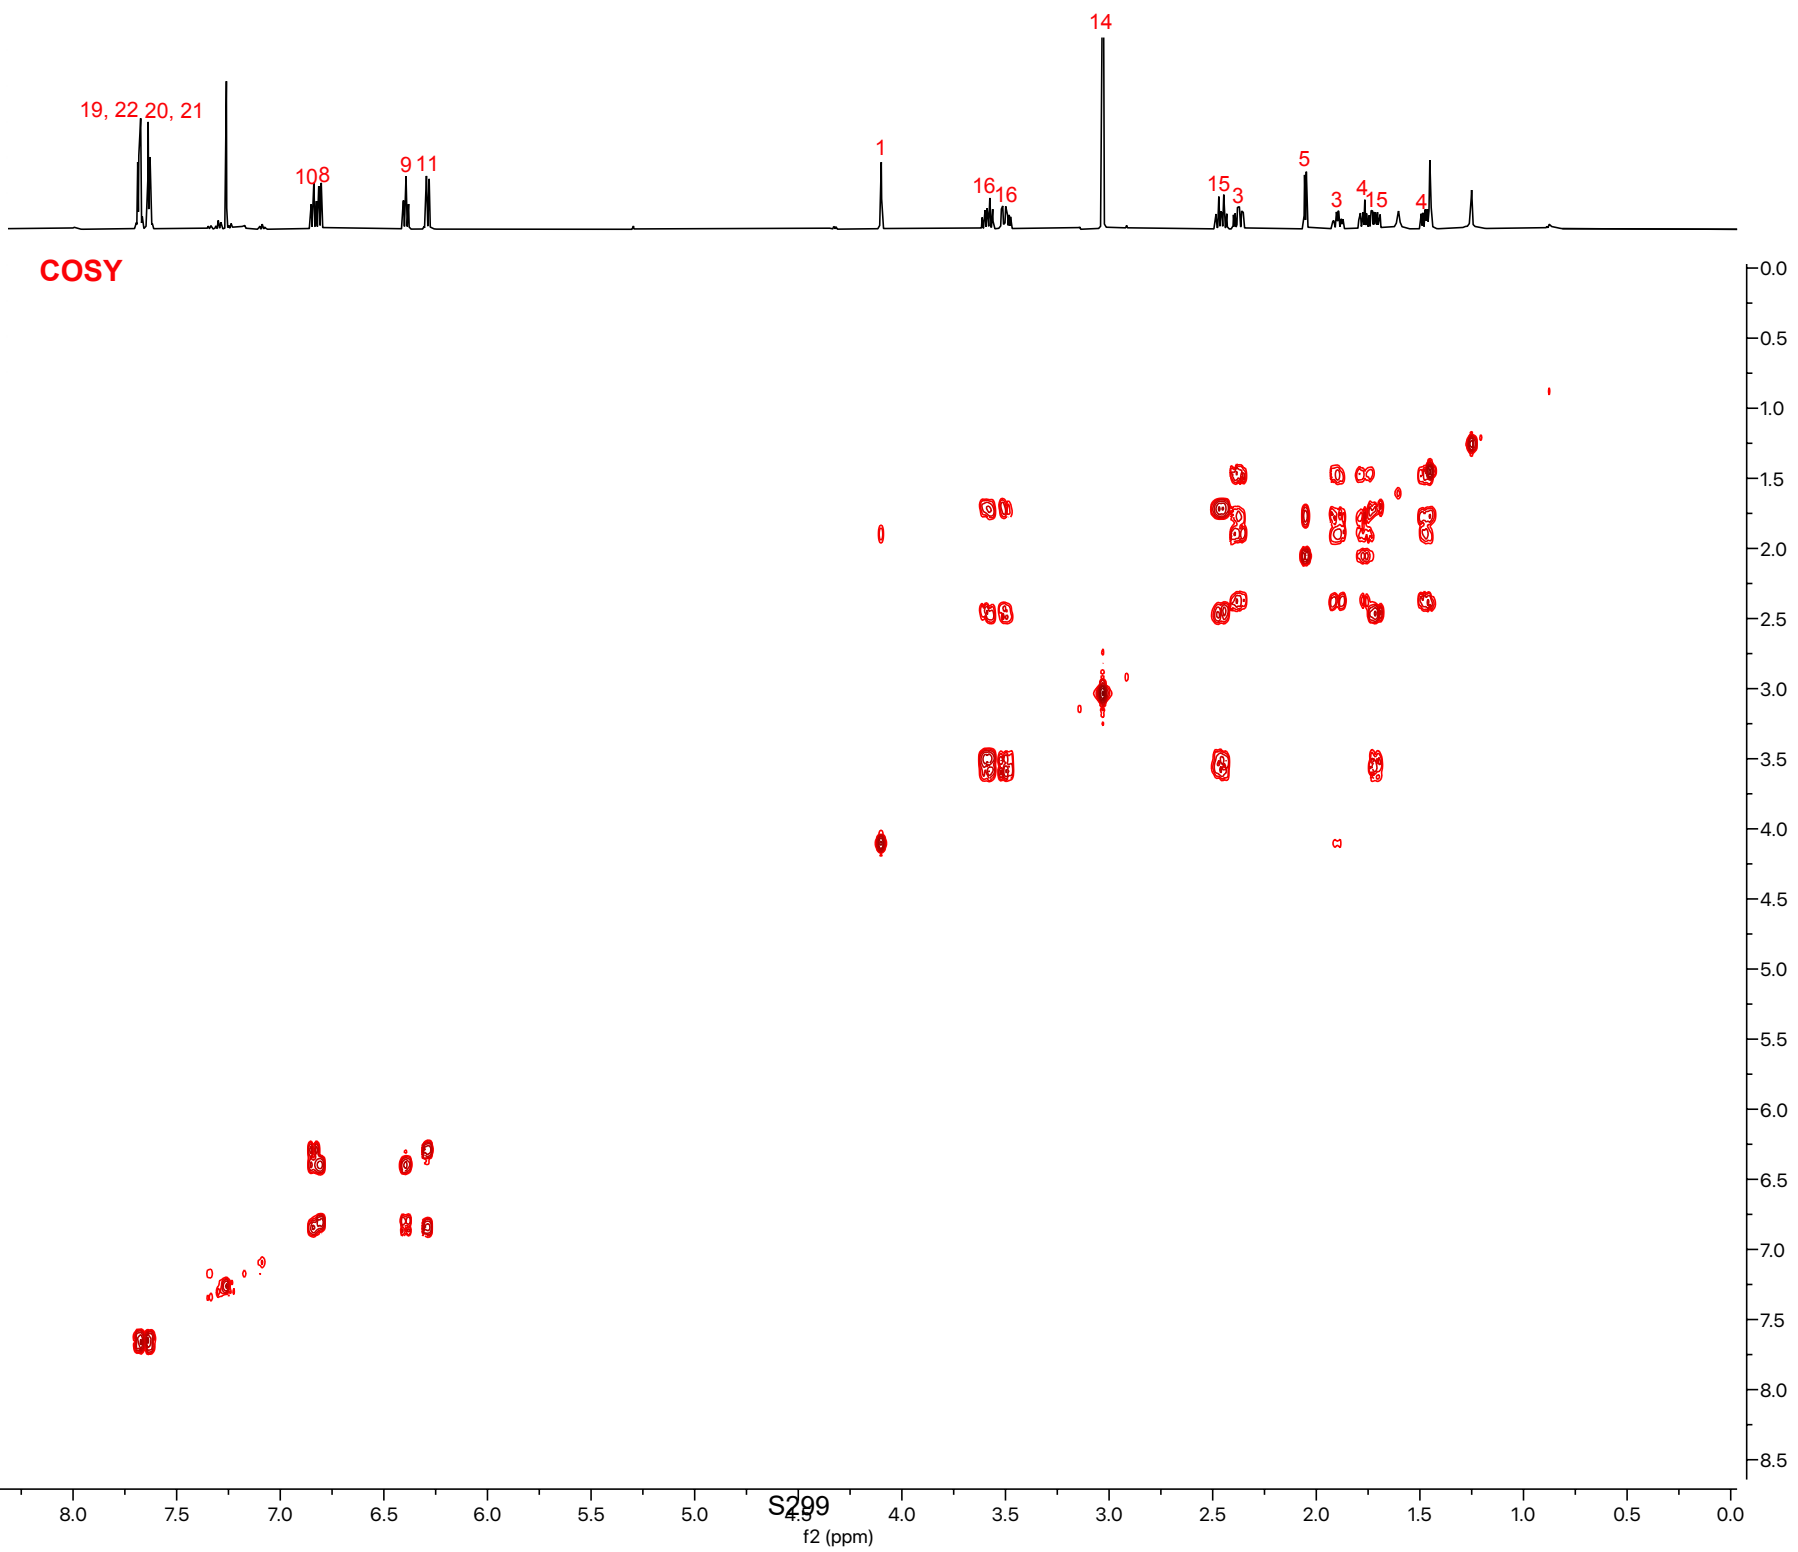

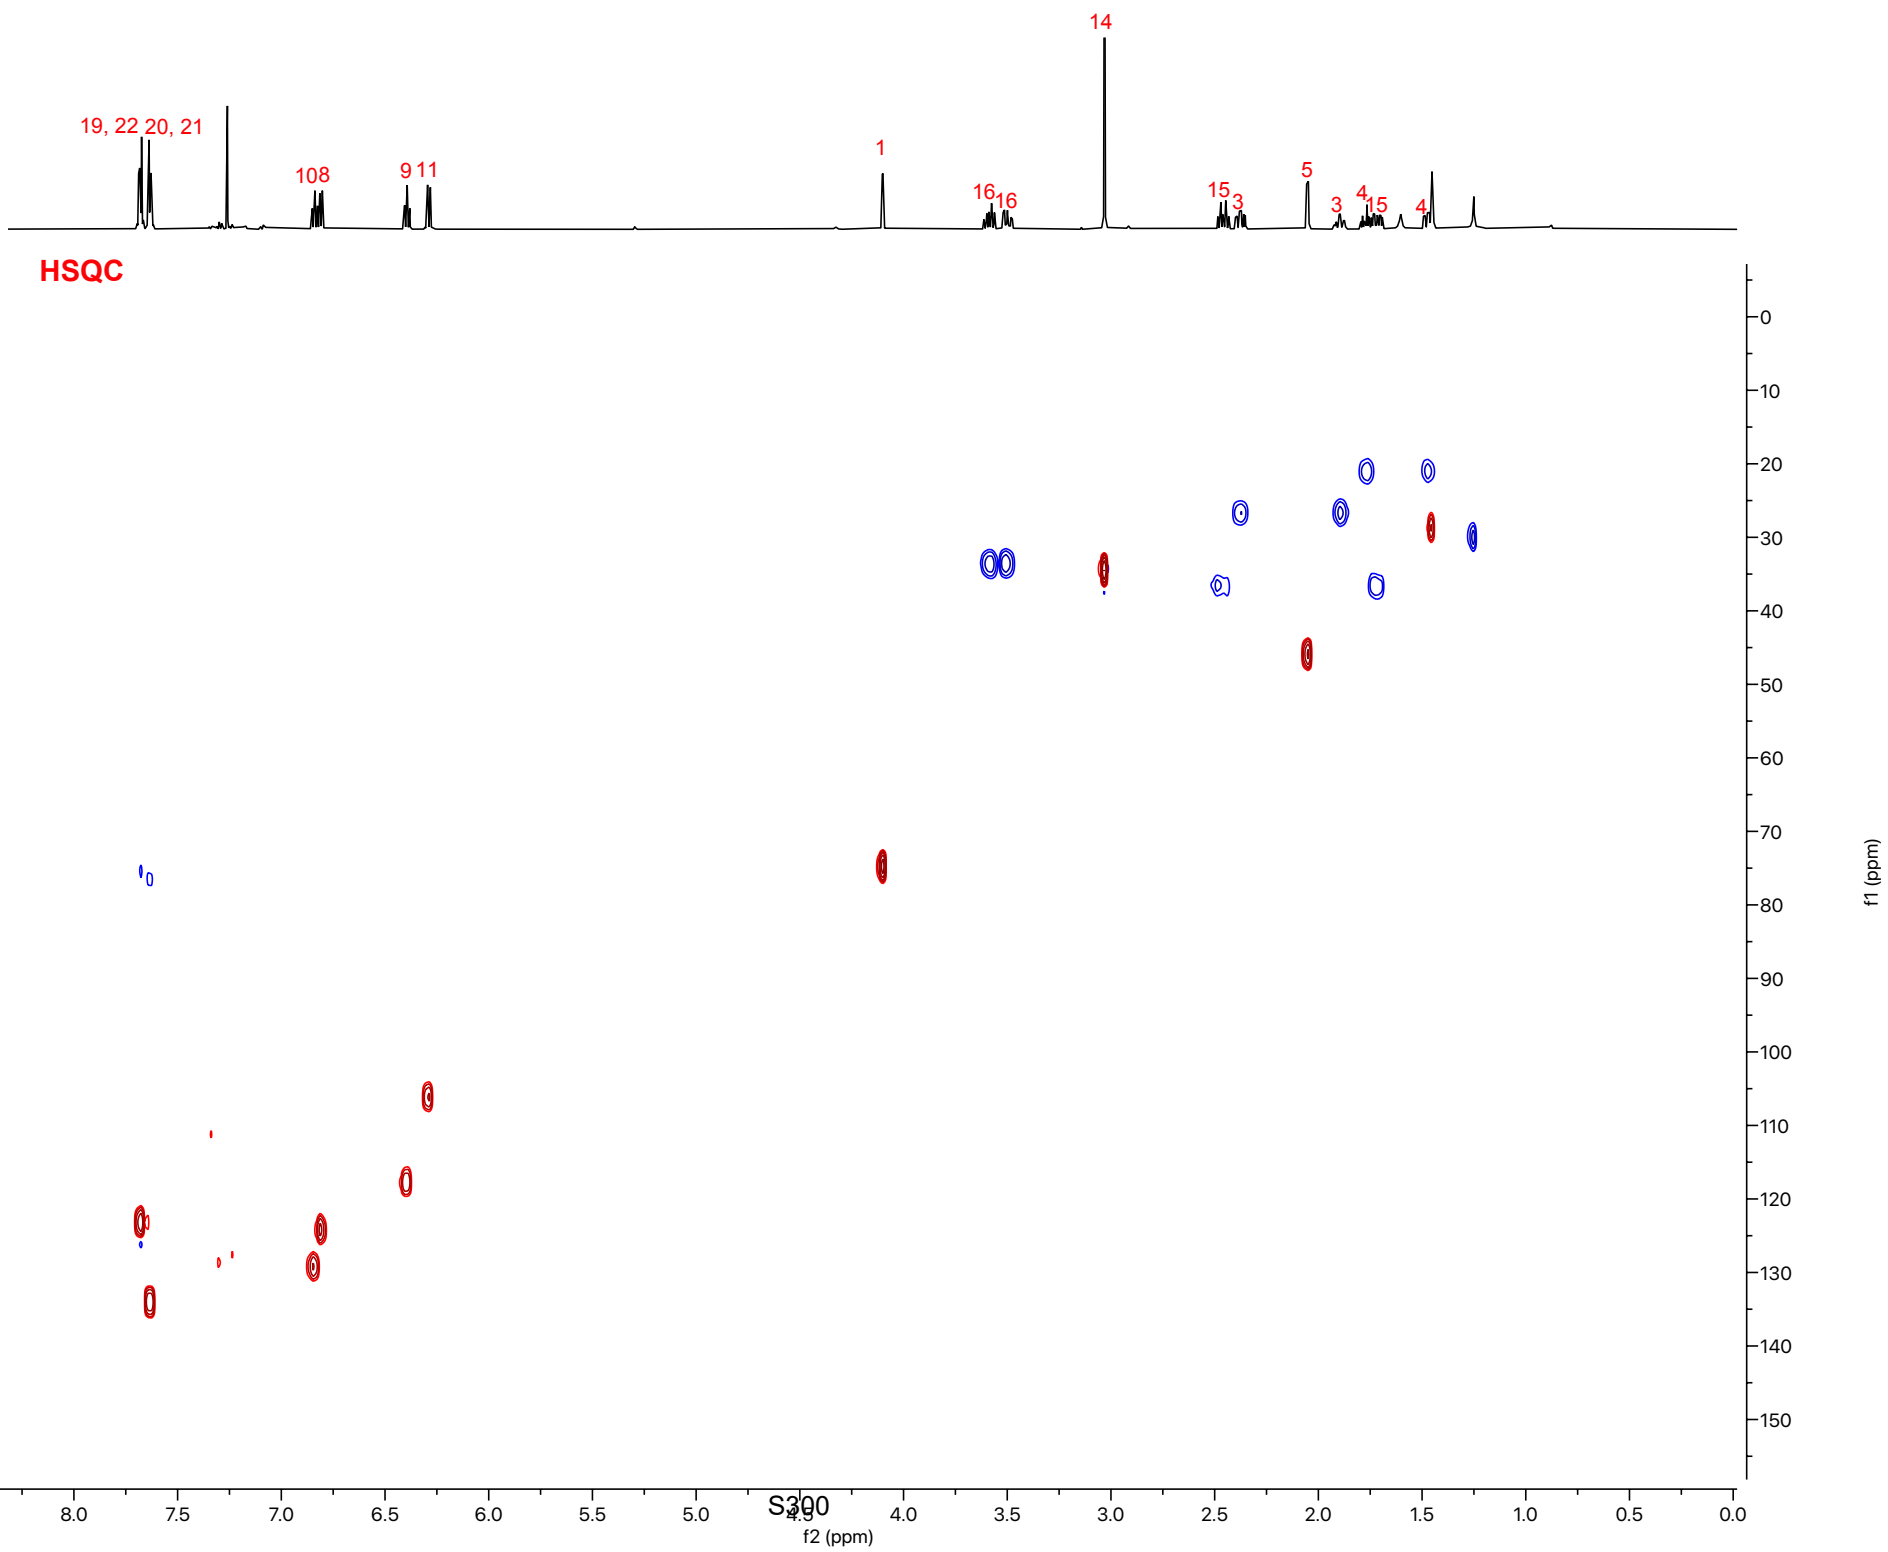

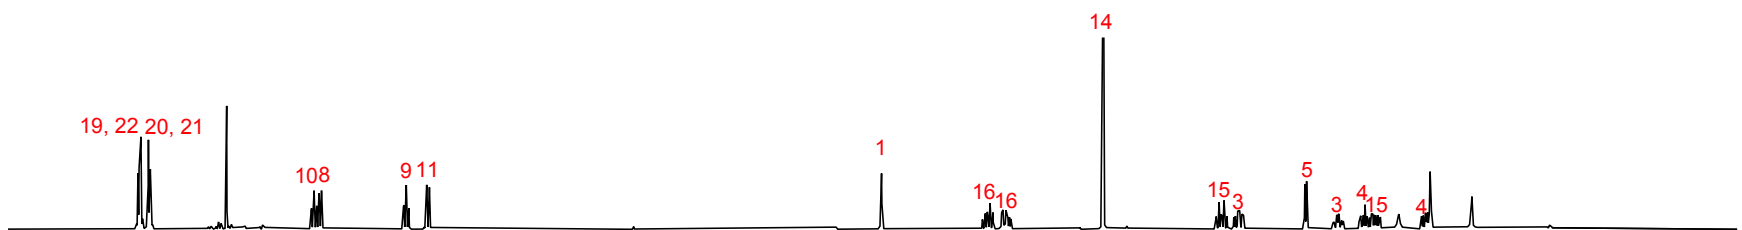

**HMBC**

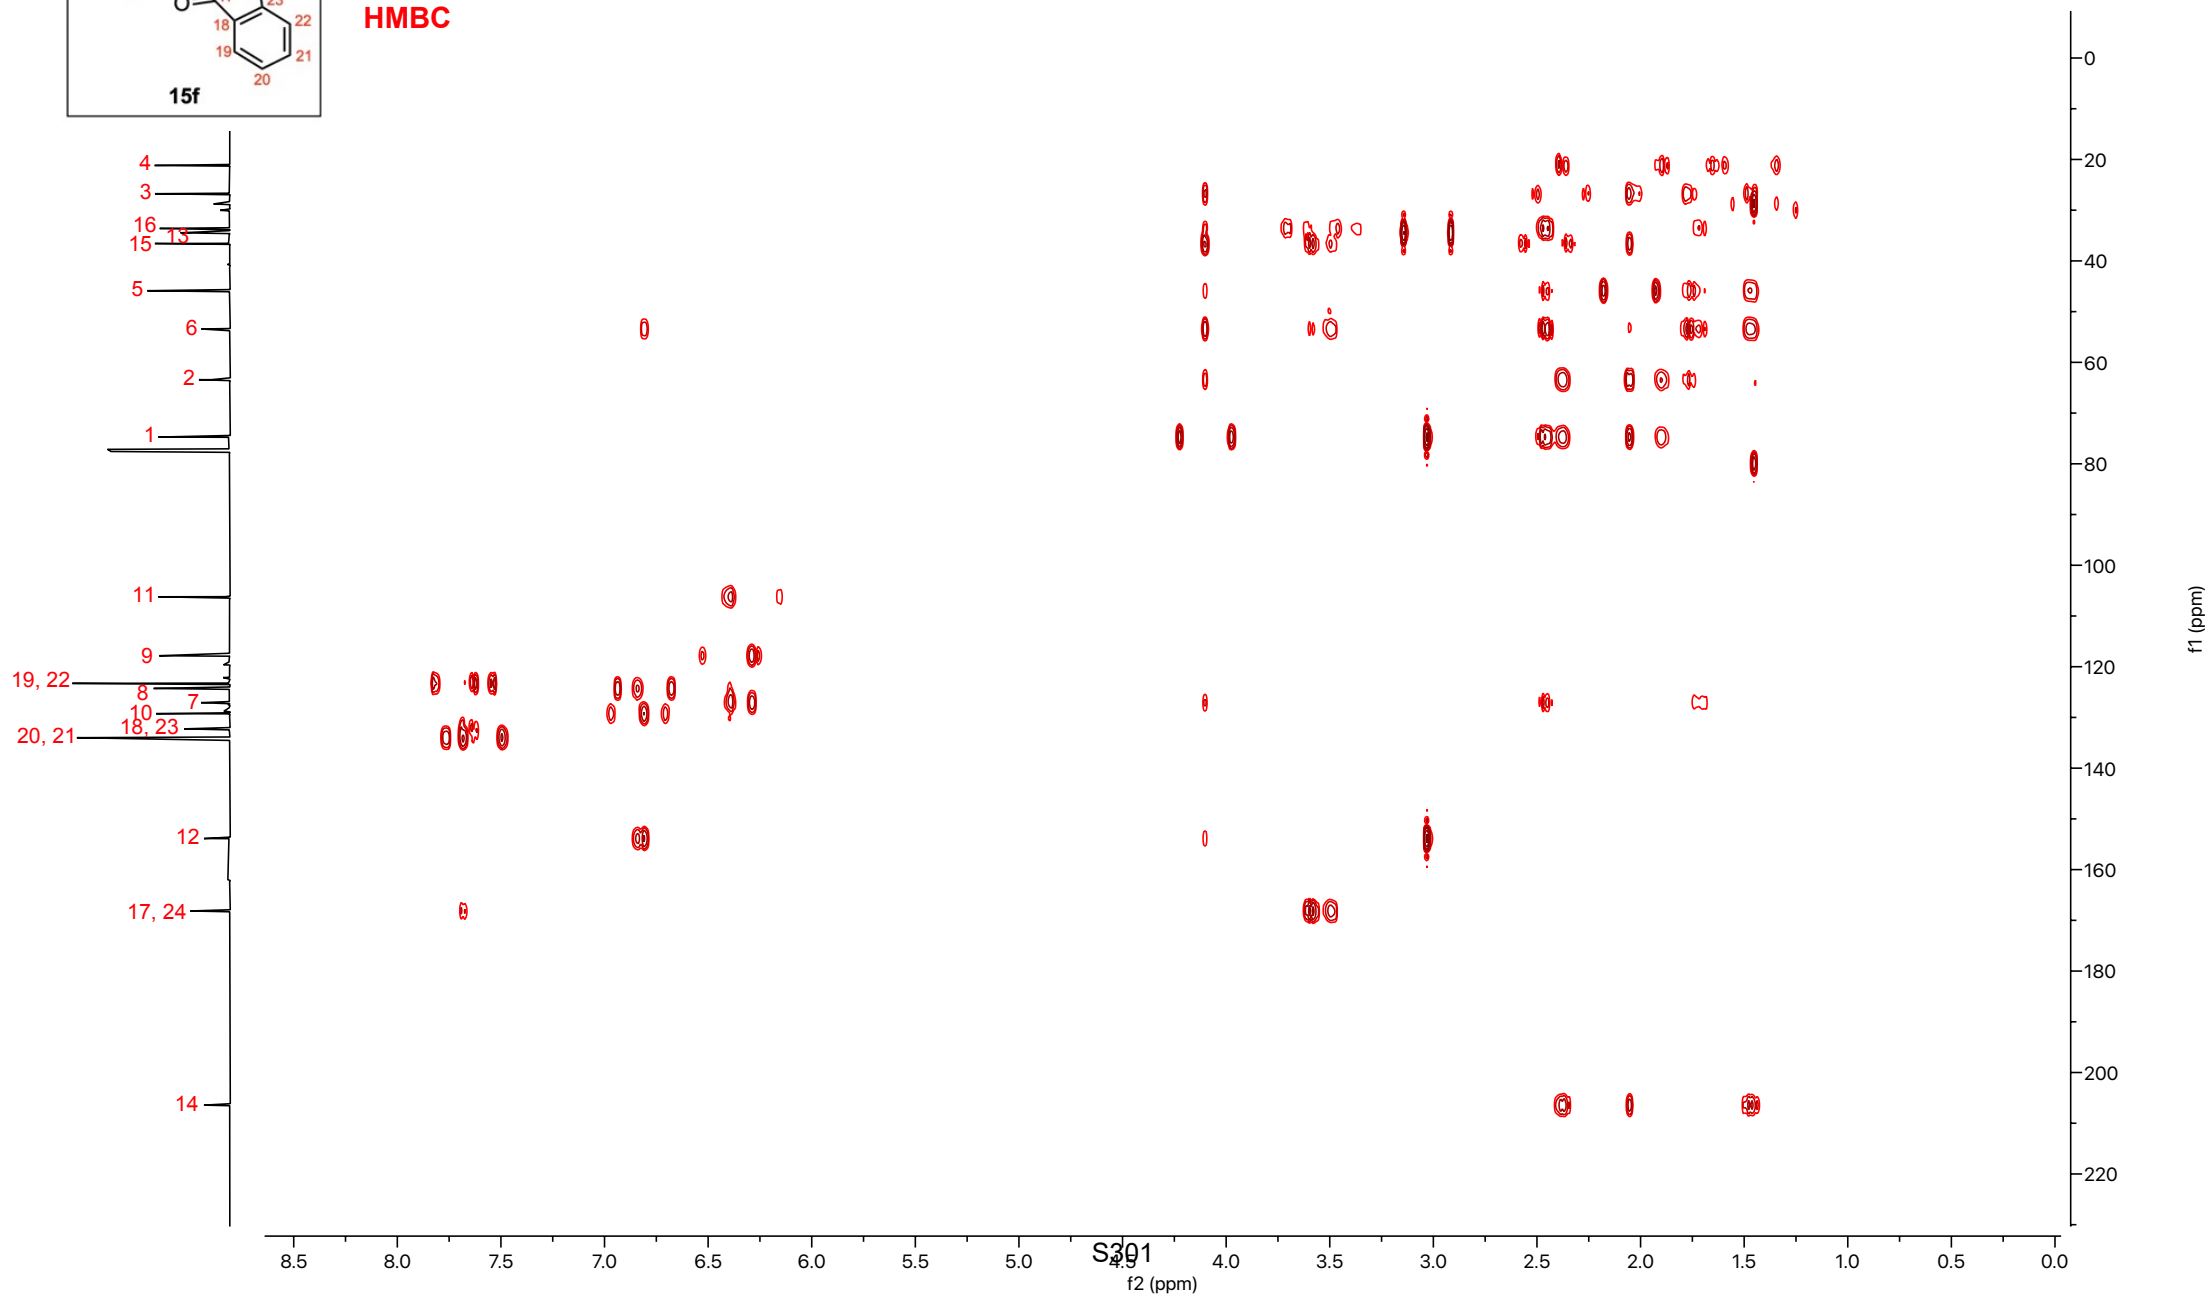

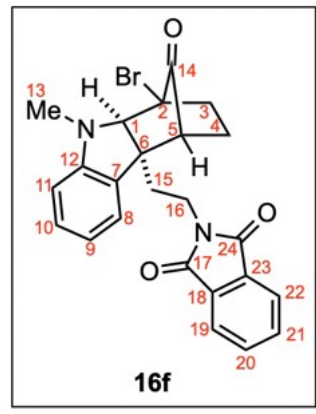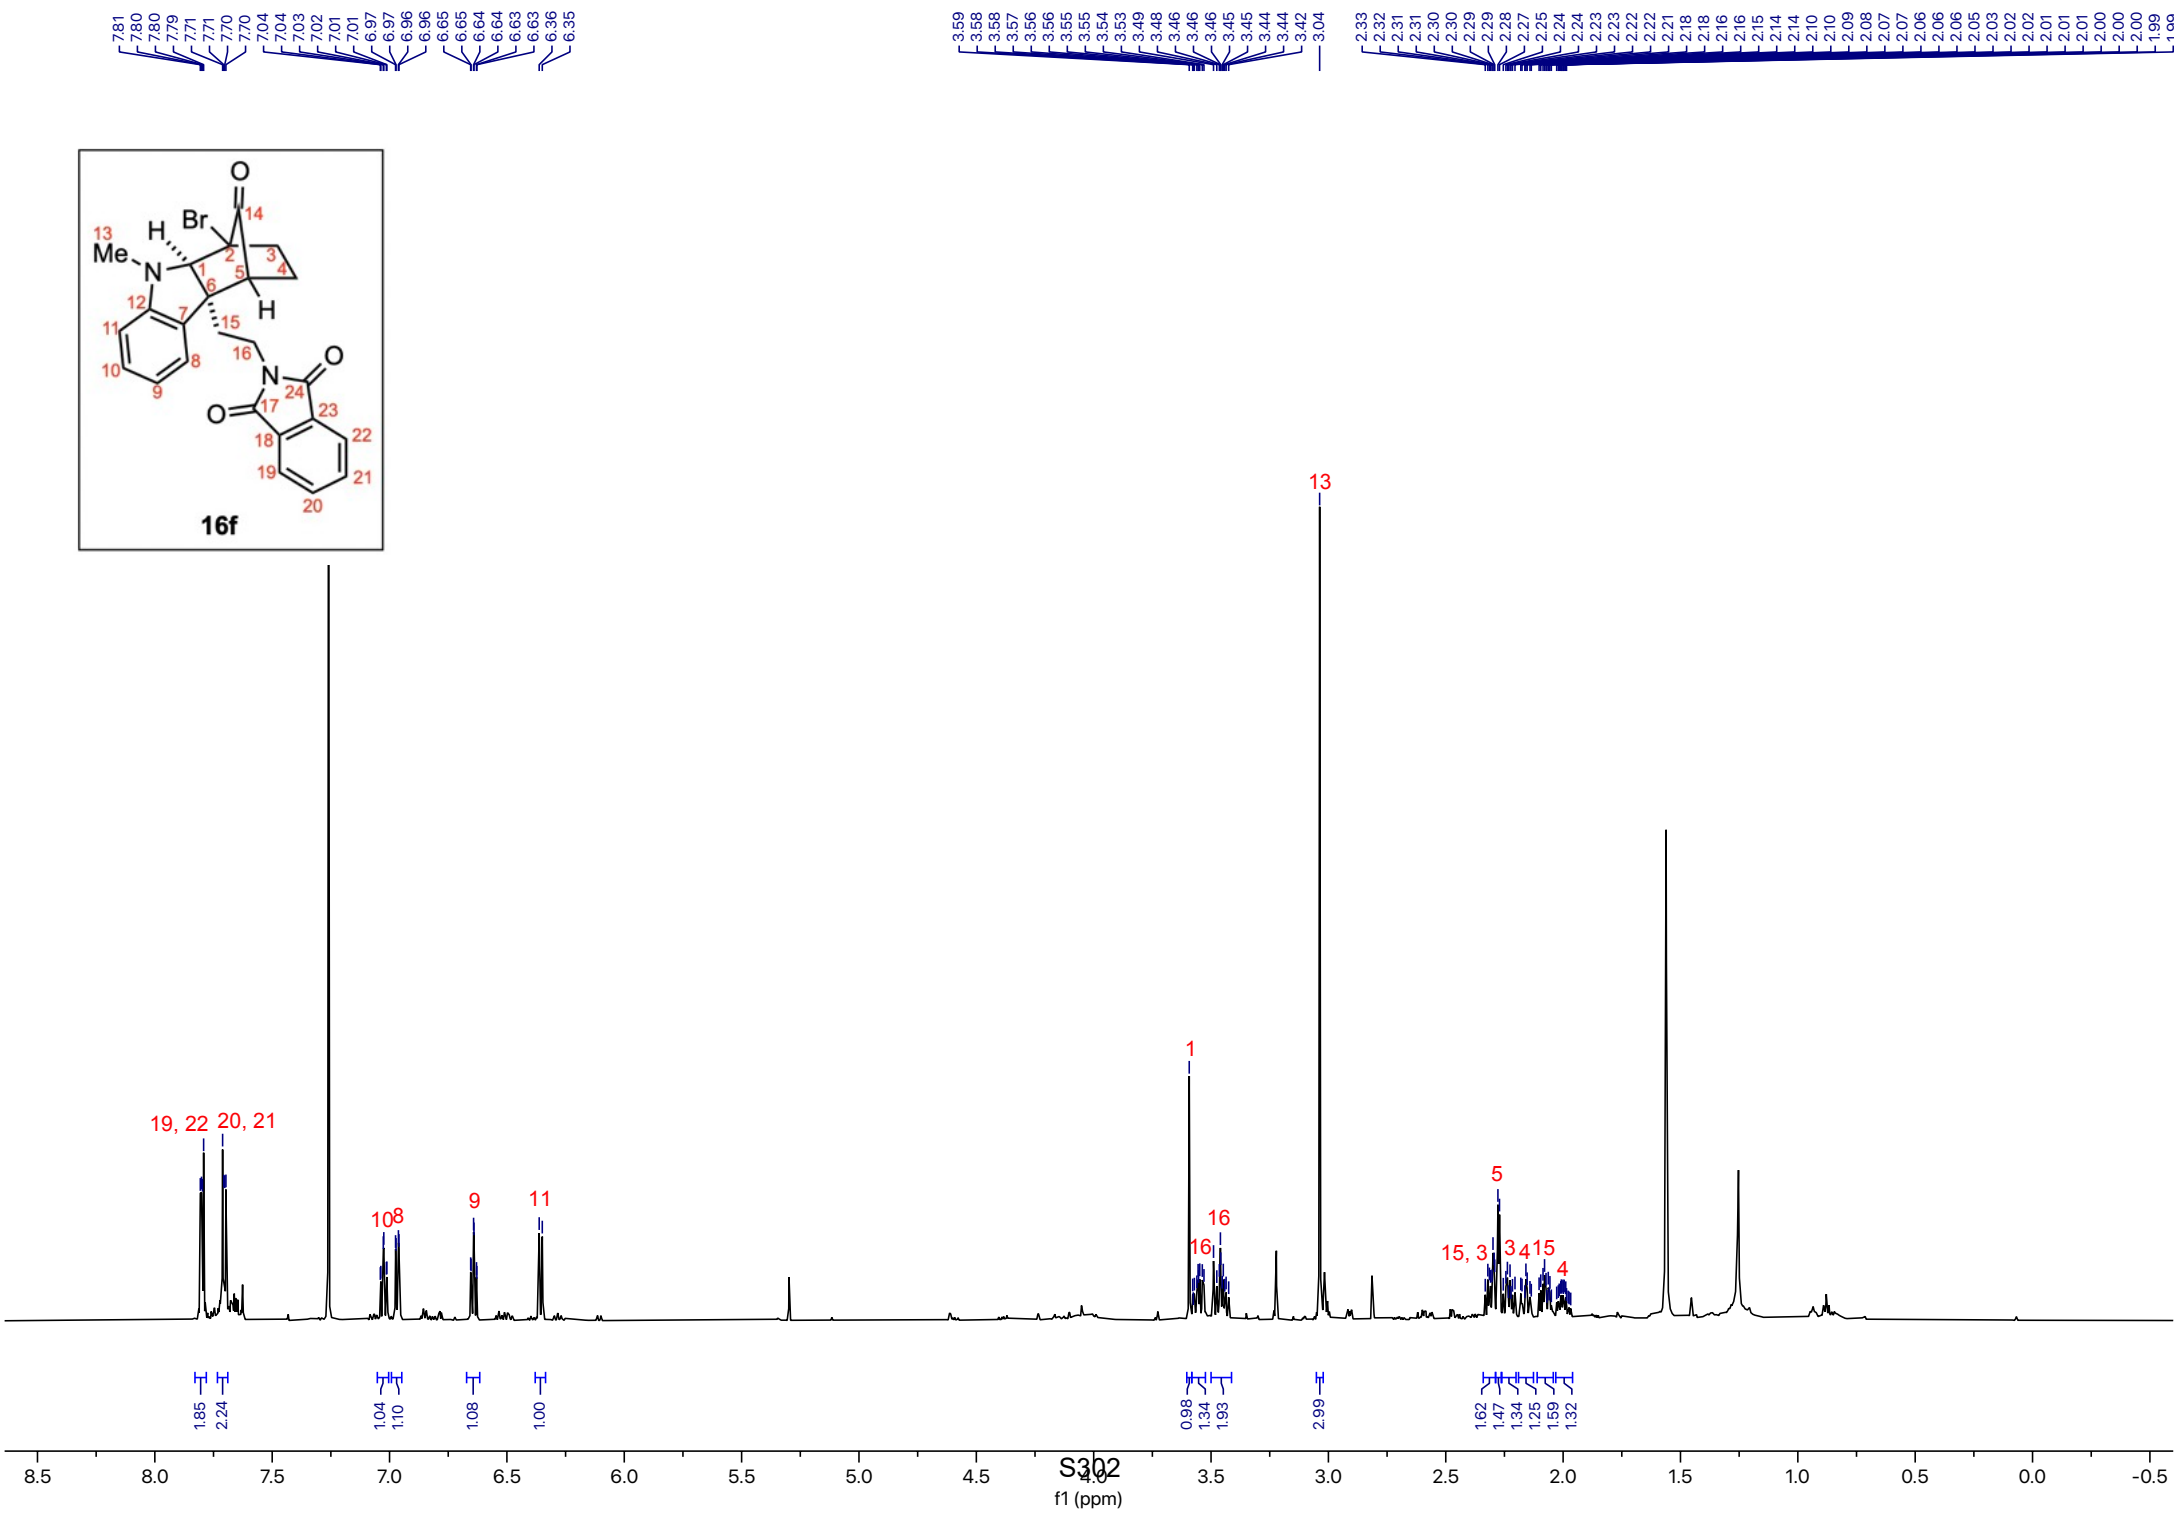

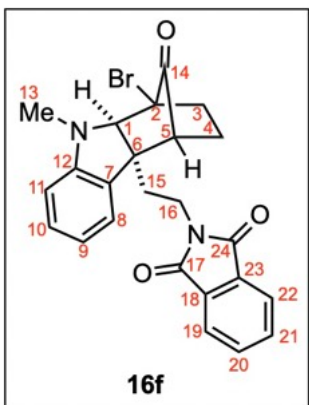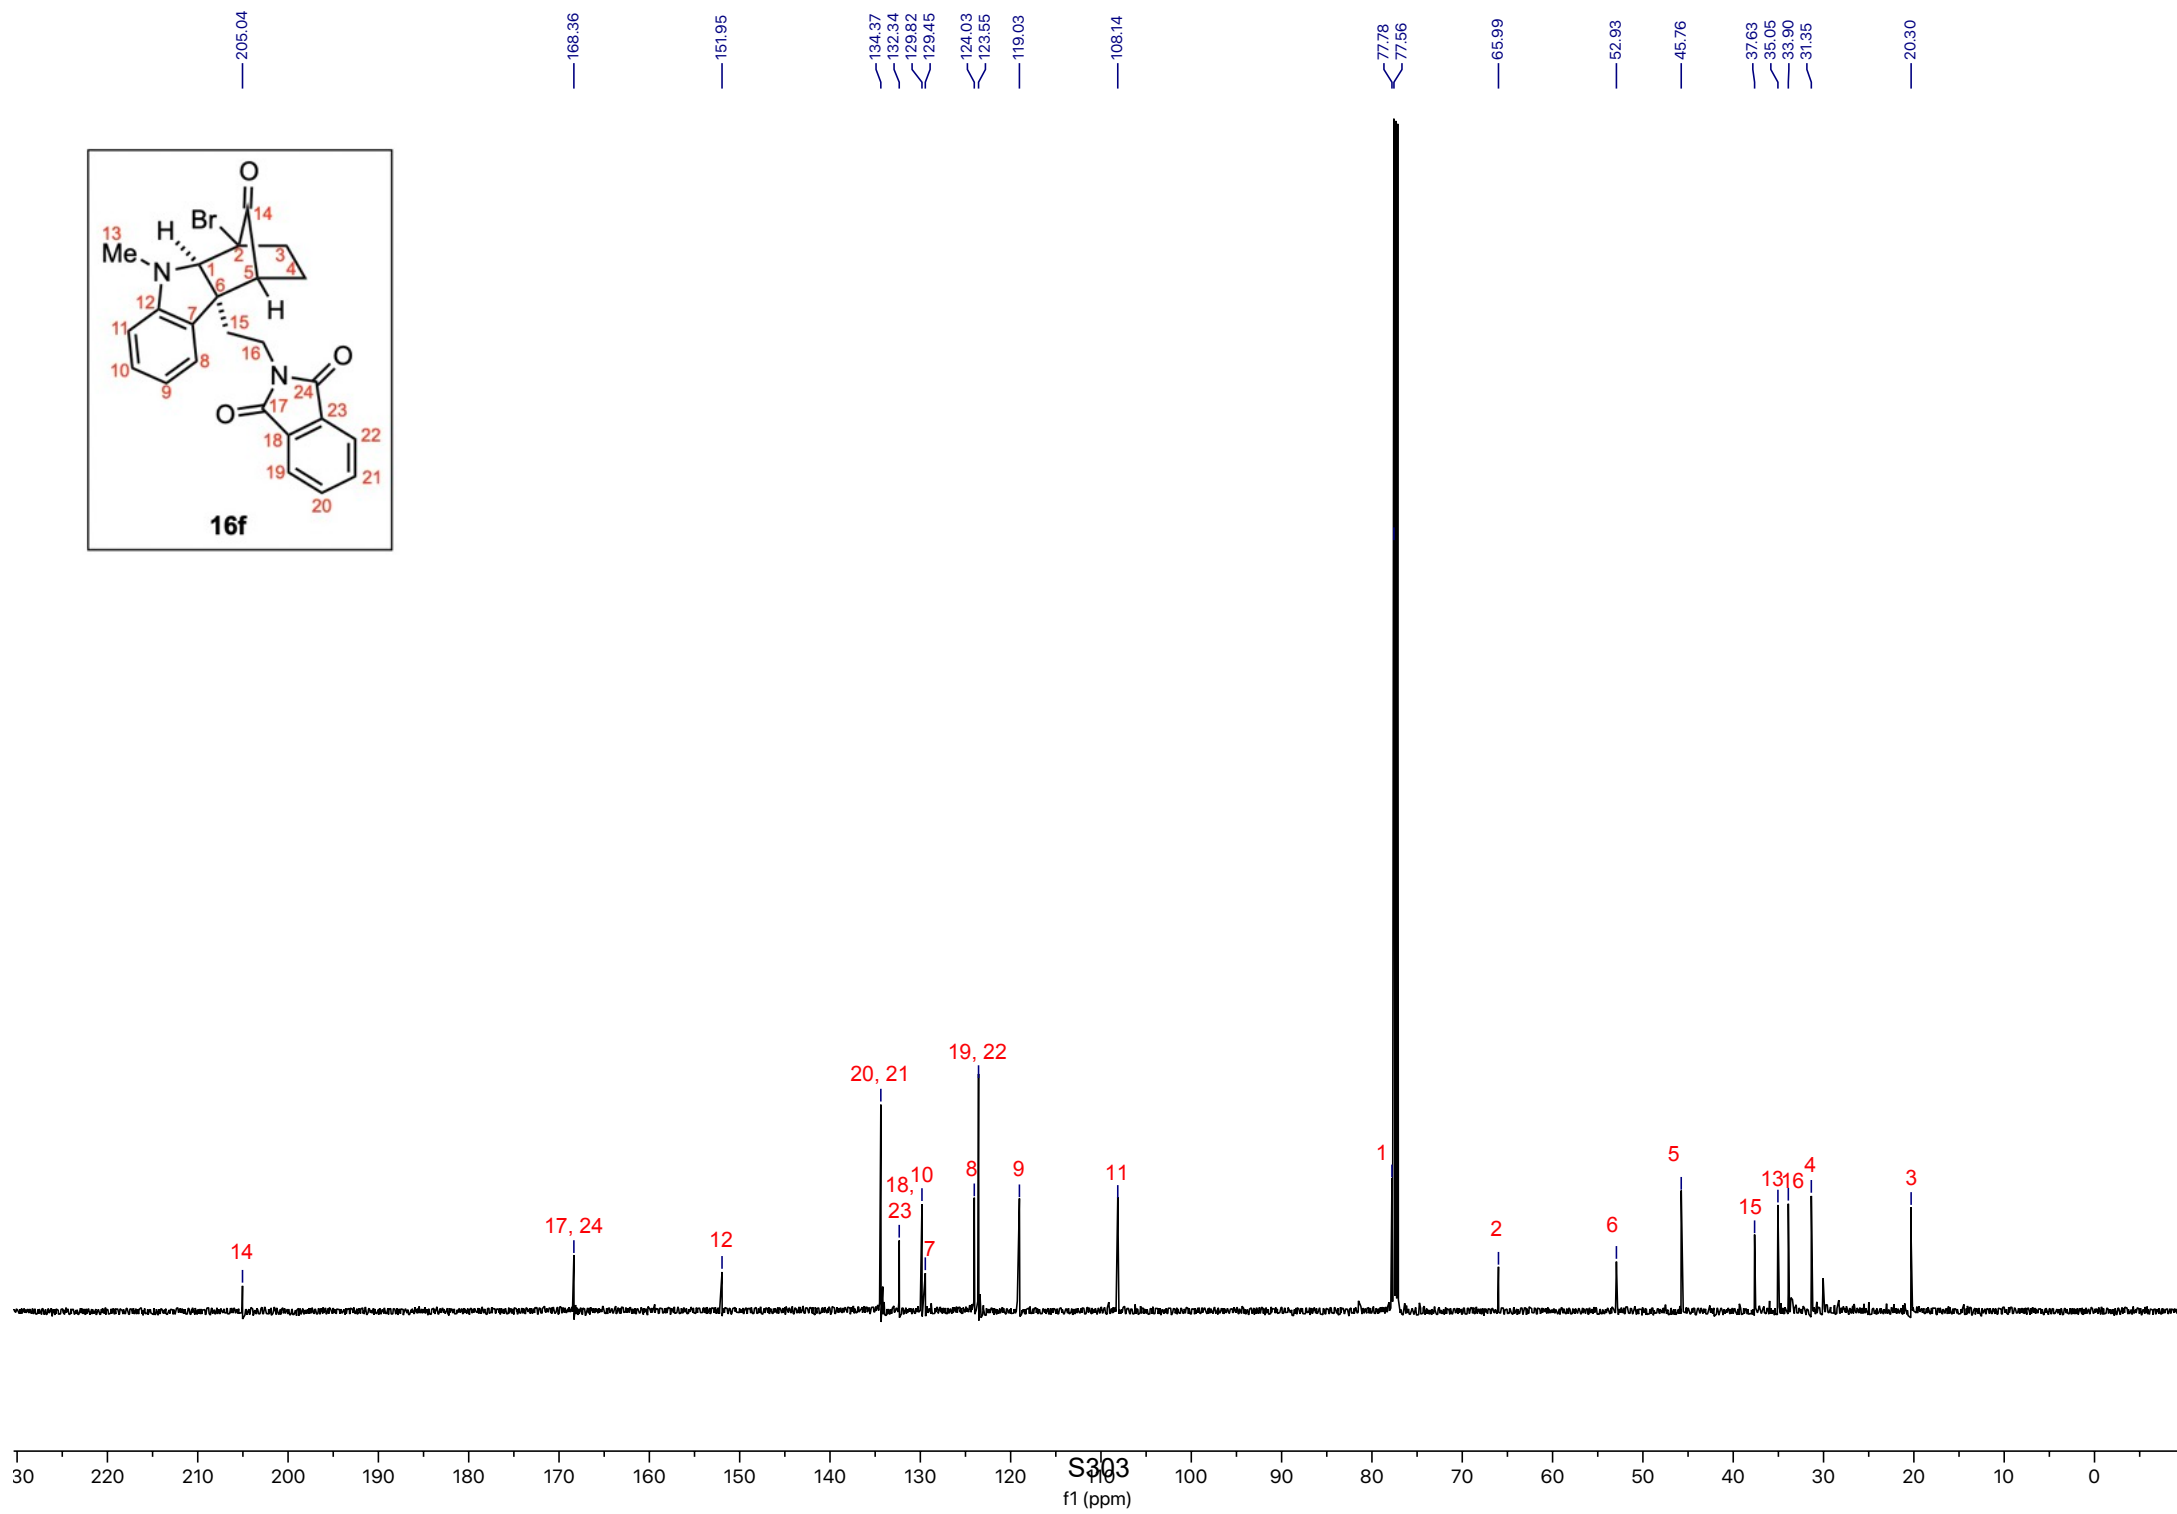



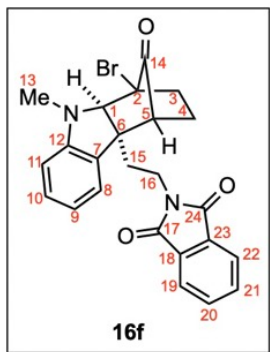

19, 22 20, 21

108

9

11

1

16

13

5

15, 3

3

4

**COSY**

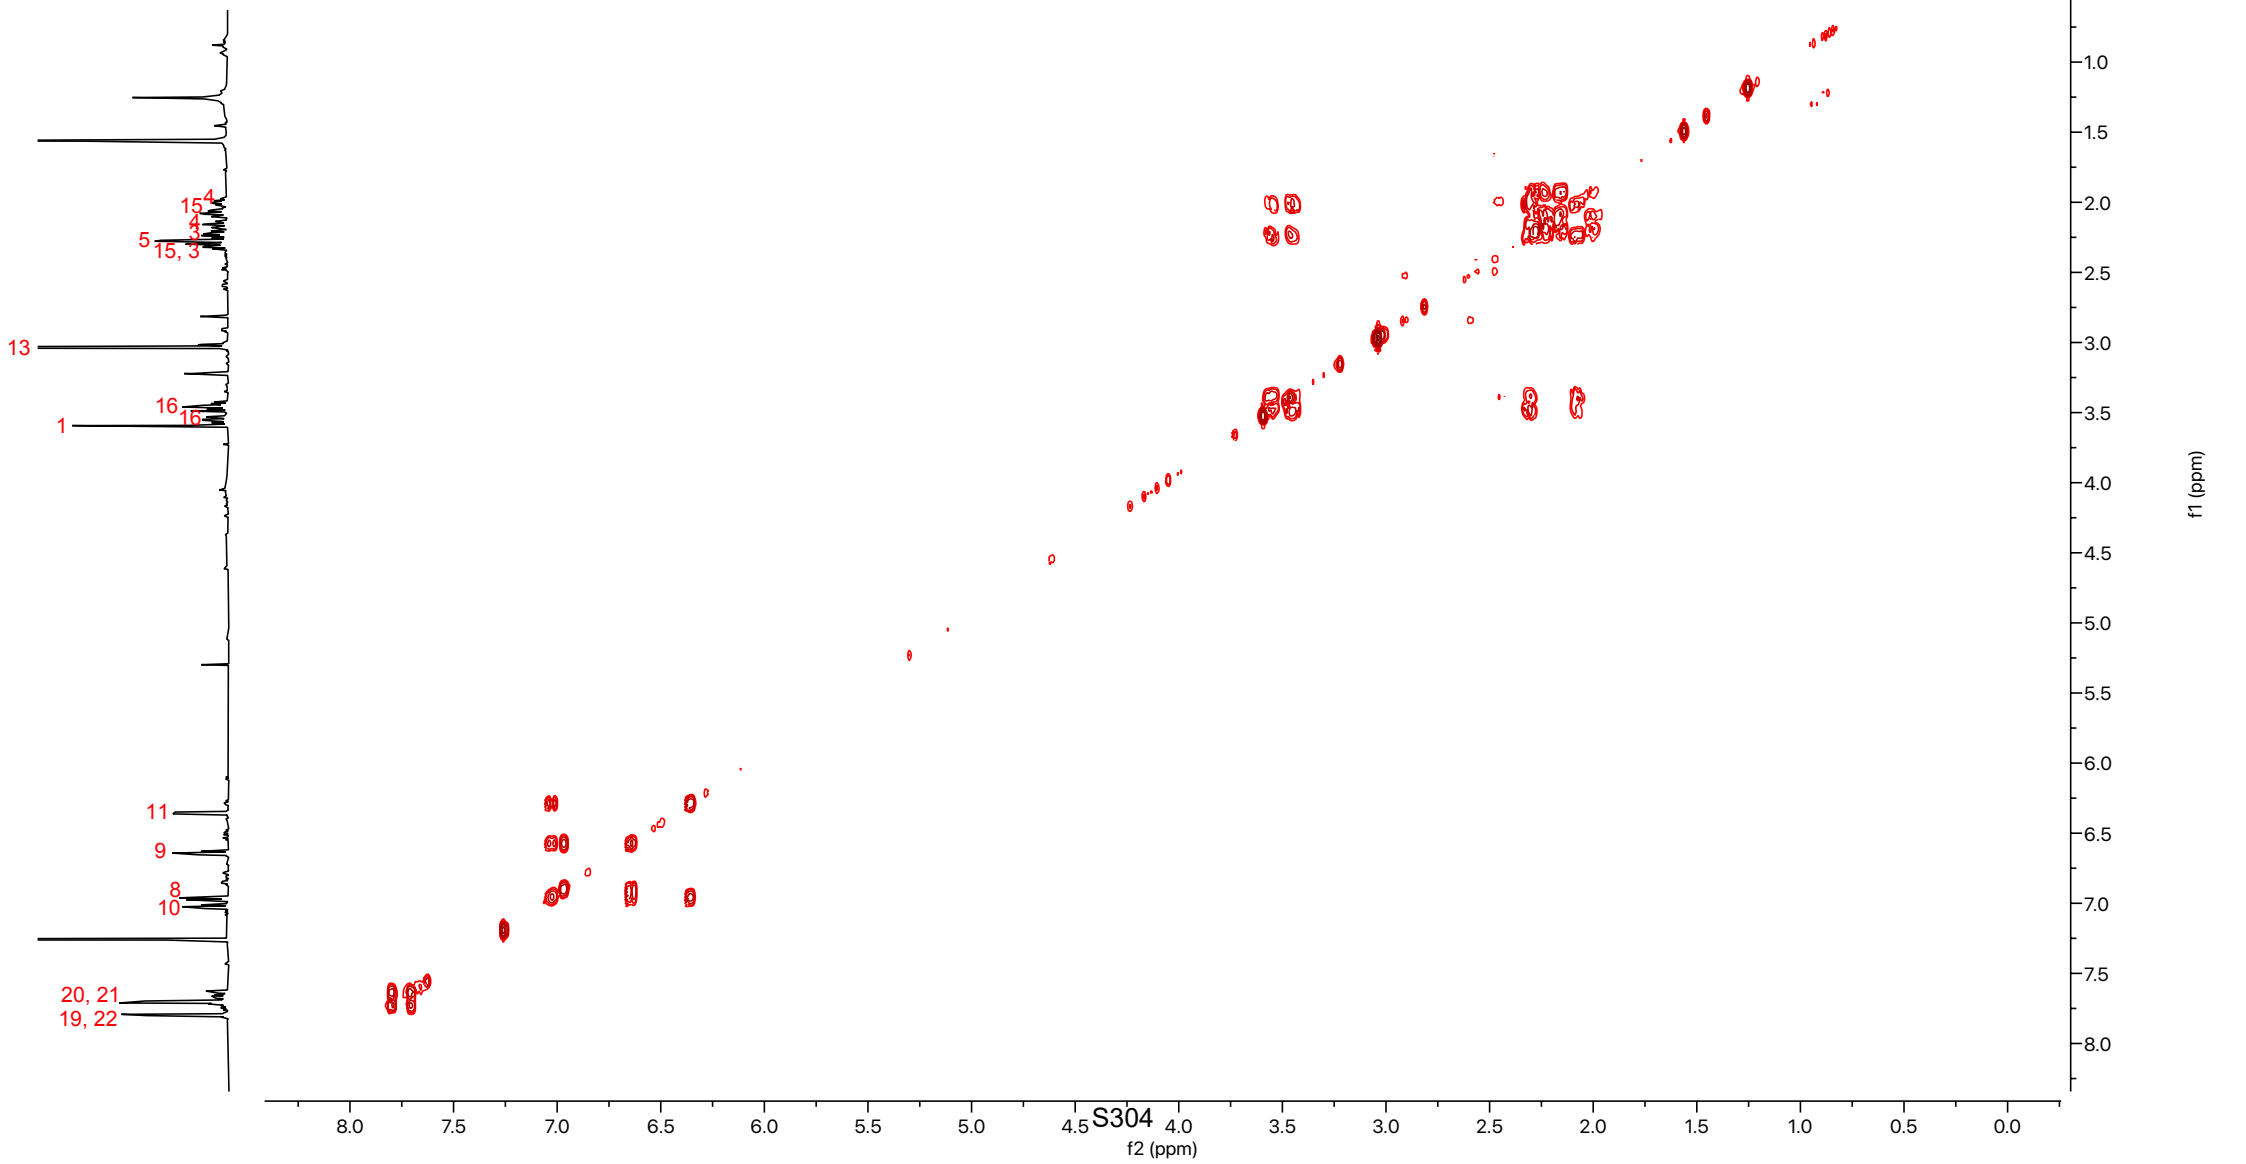

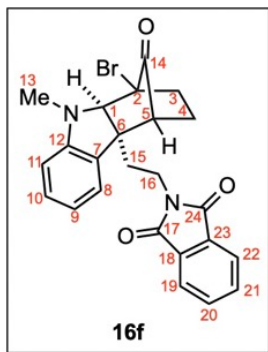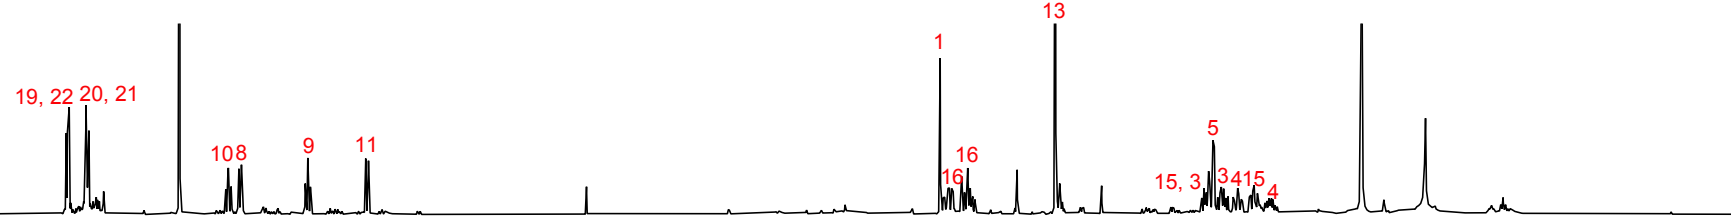

**HSQC**

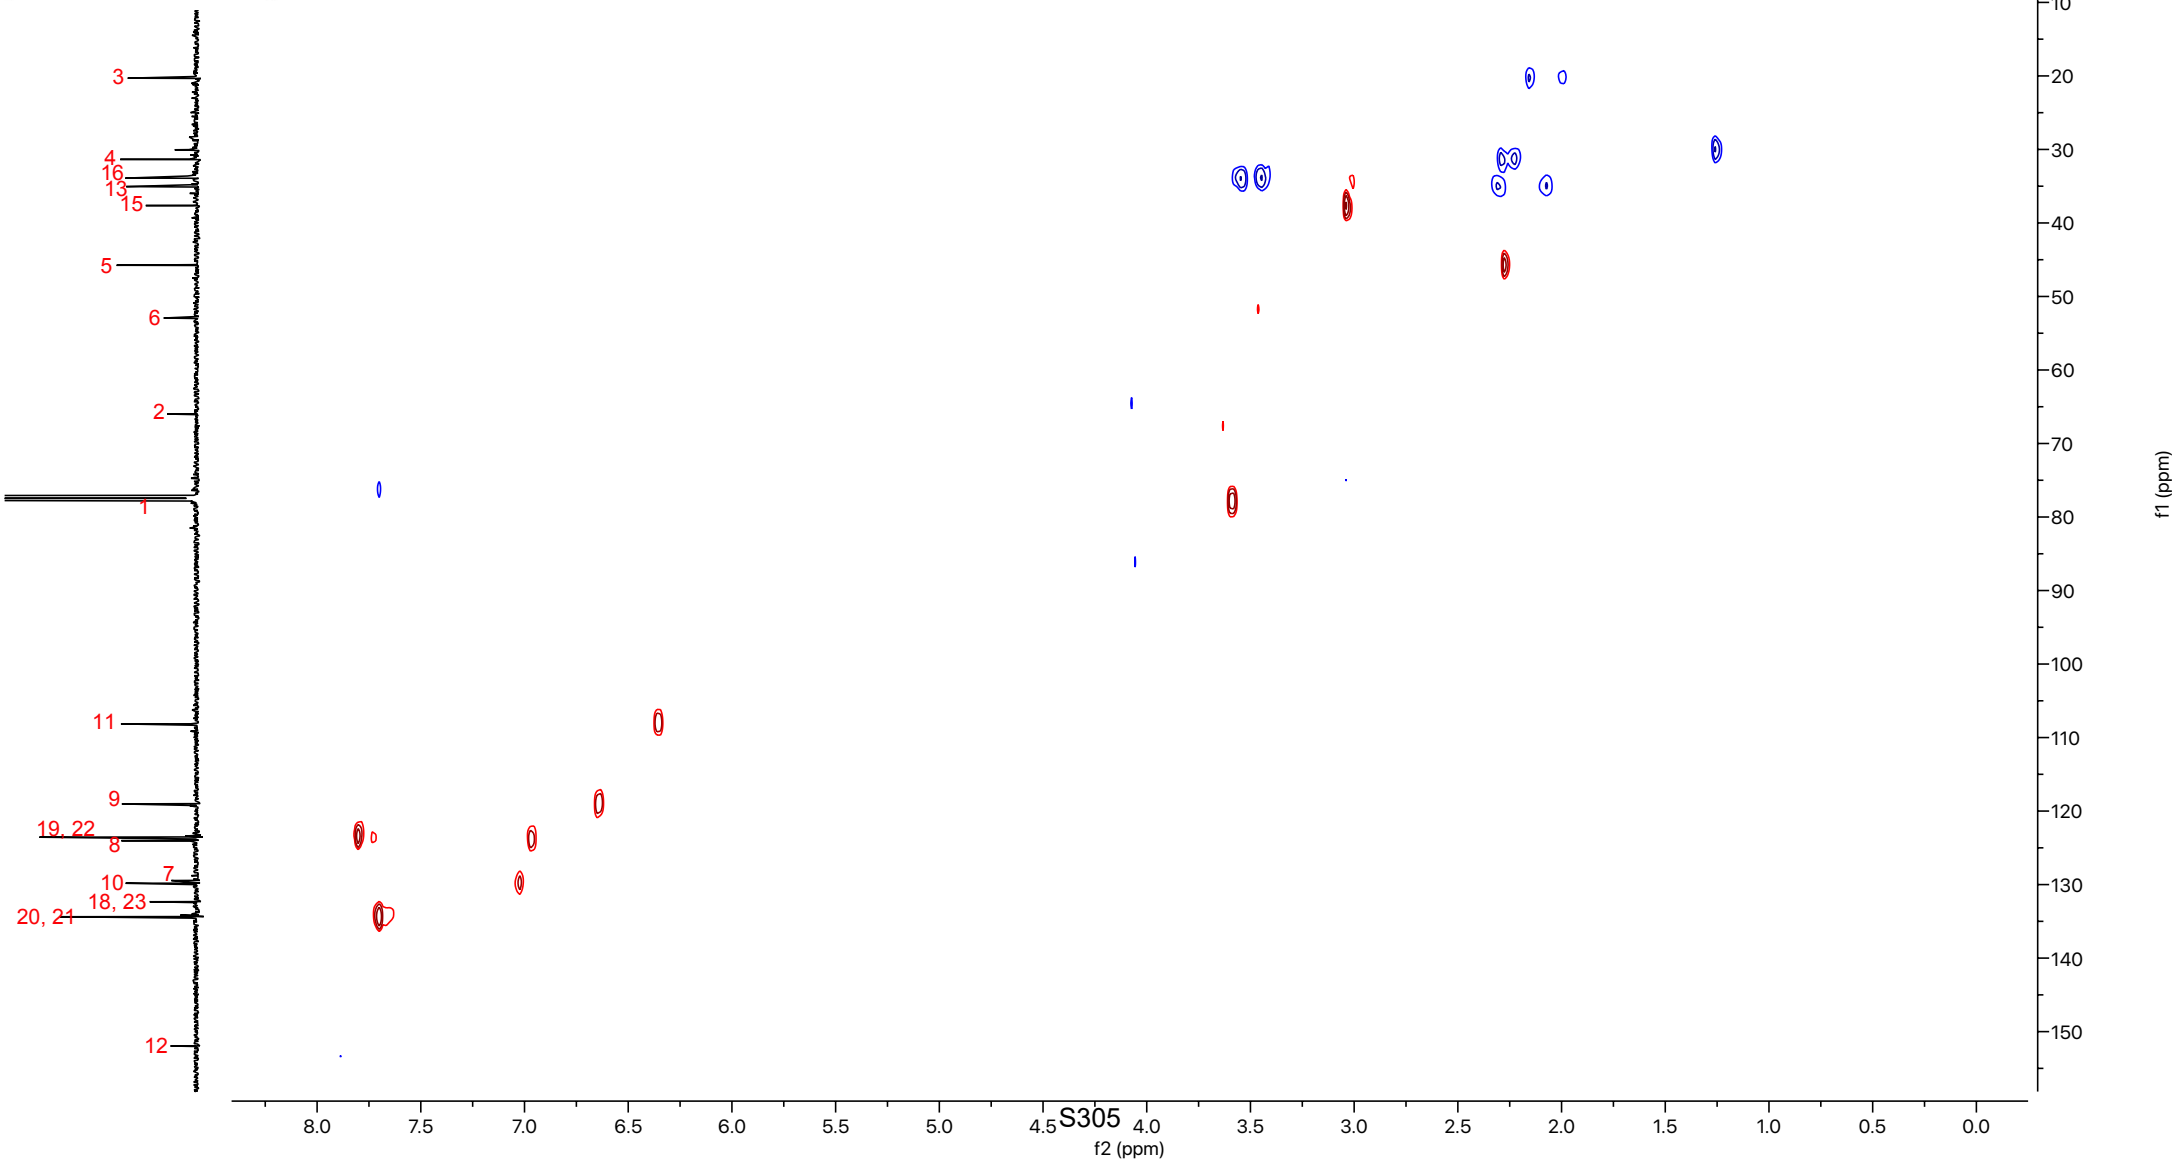

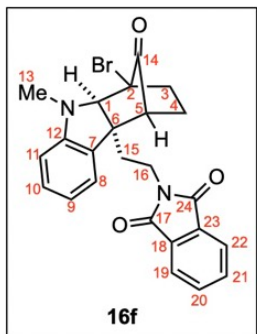

19, 22 20, 21

108

9

11

1

16

13

5

15, 3

3

4

**HMBC**

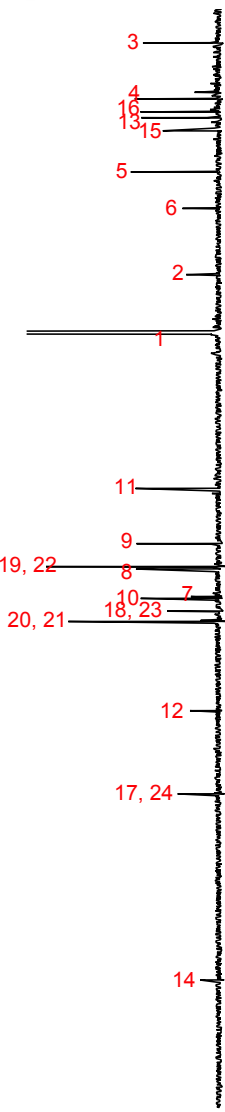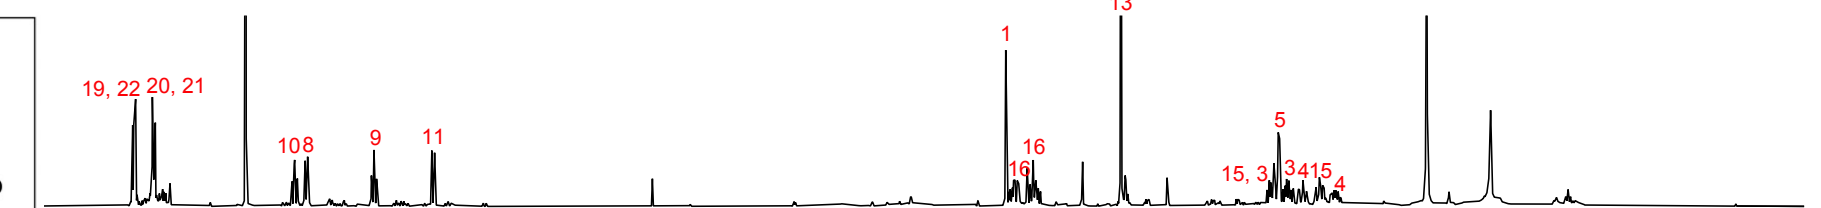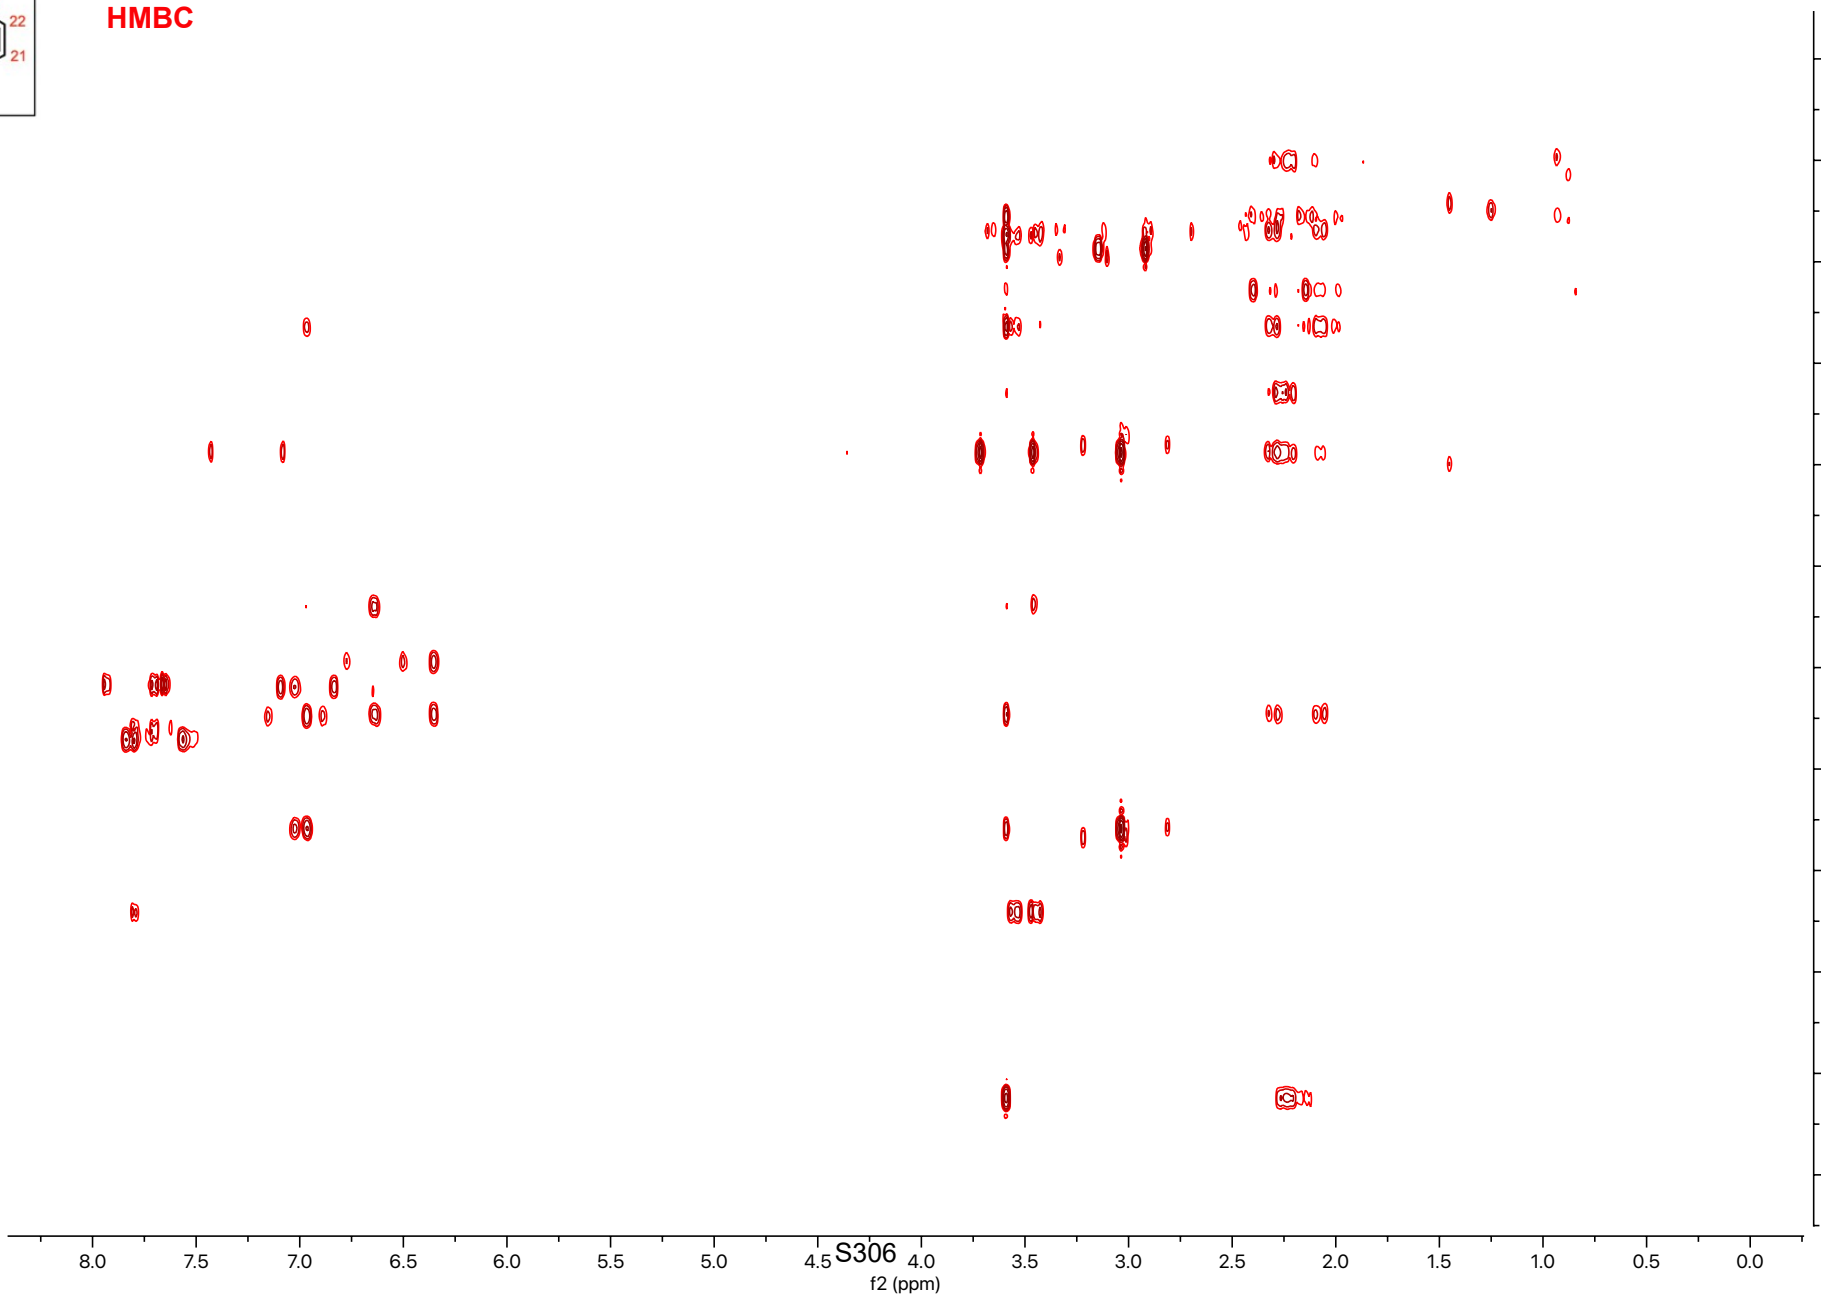

f1 (ppm)

S306

f2 (ppm)

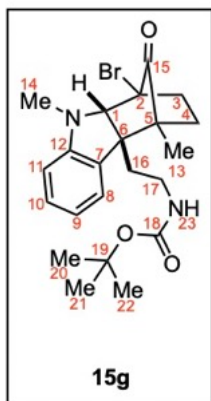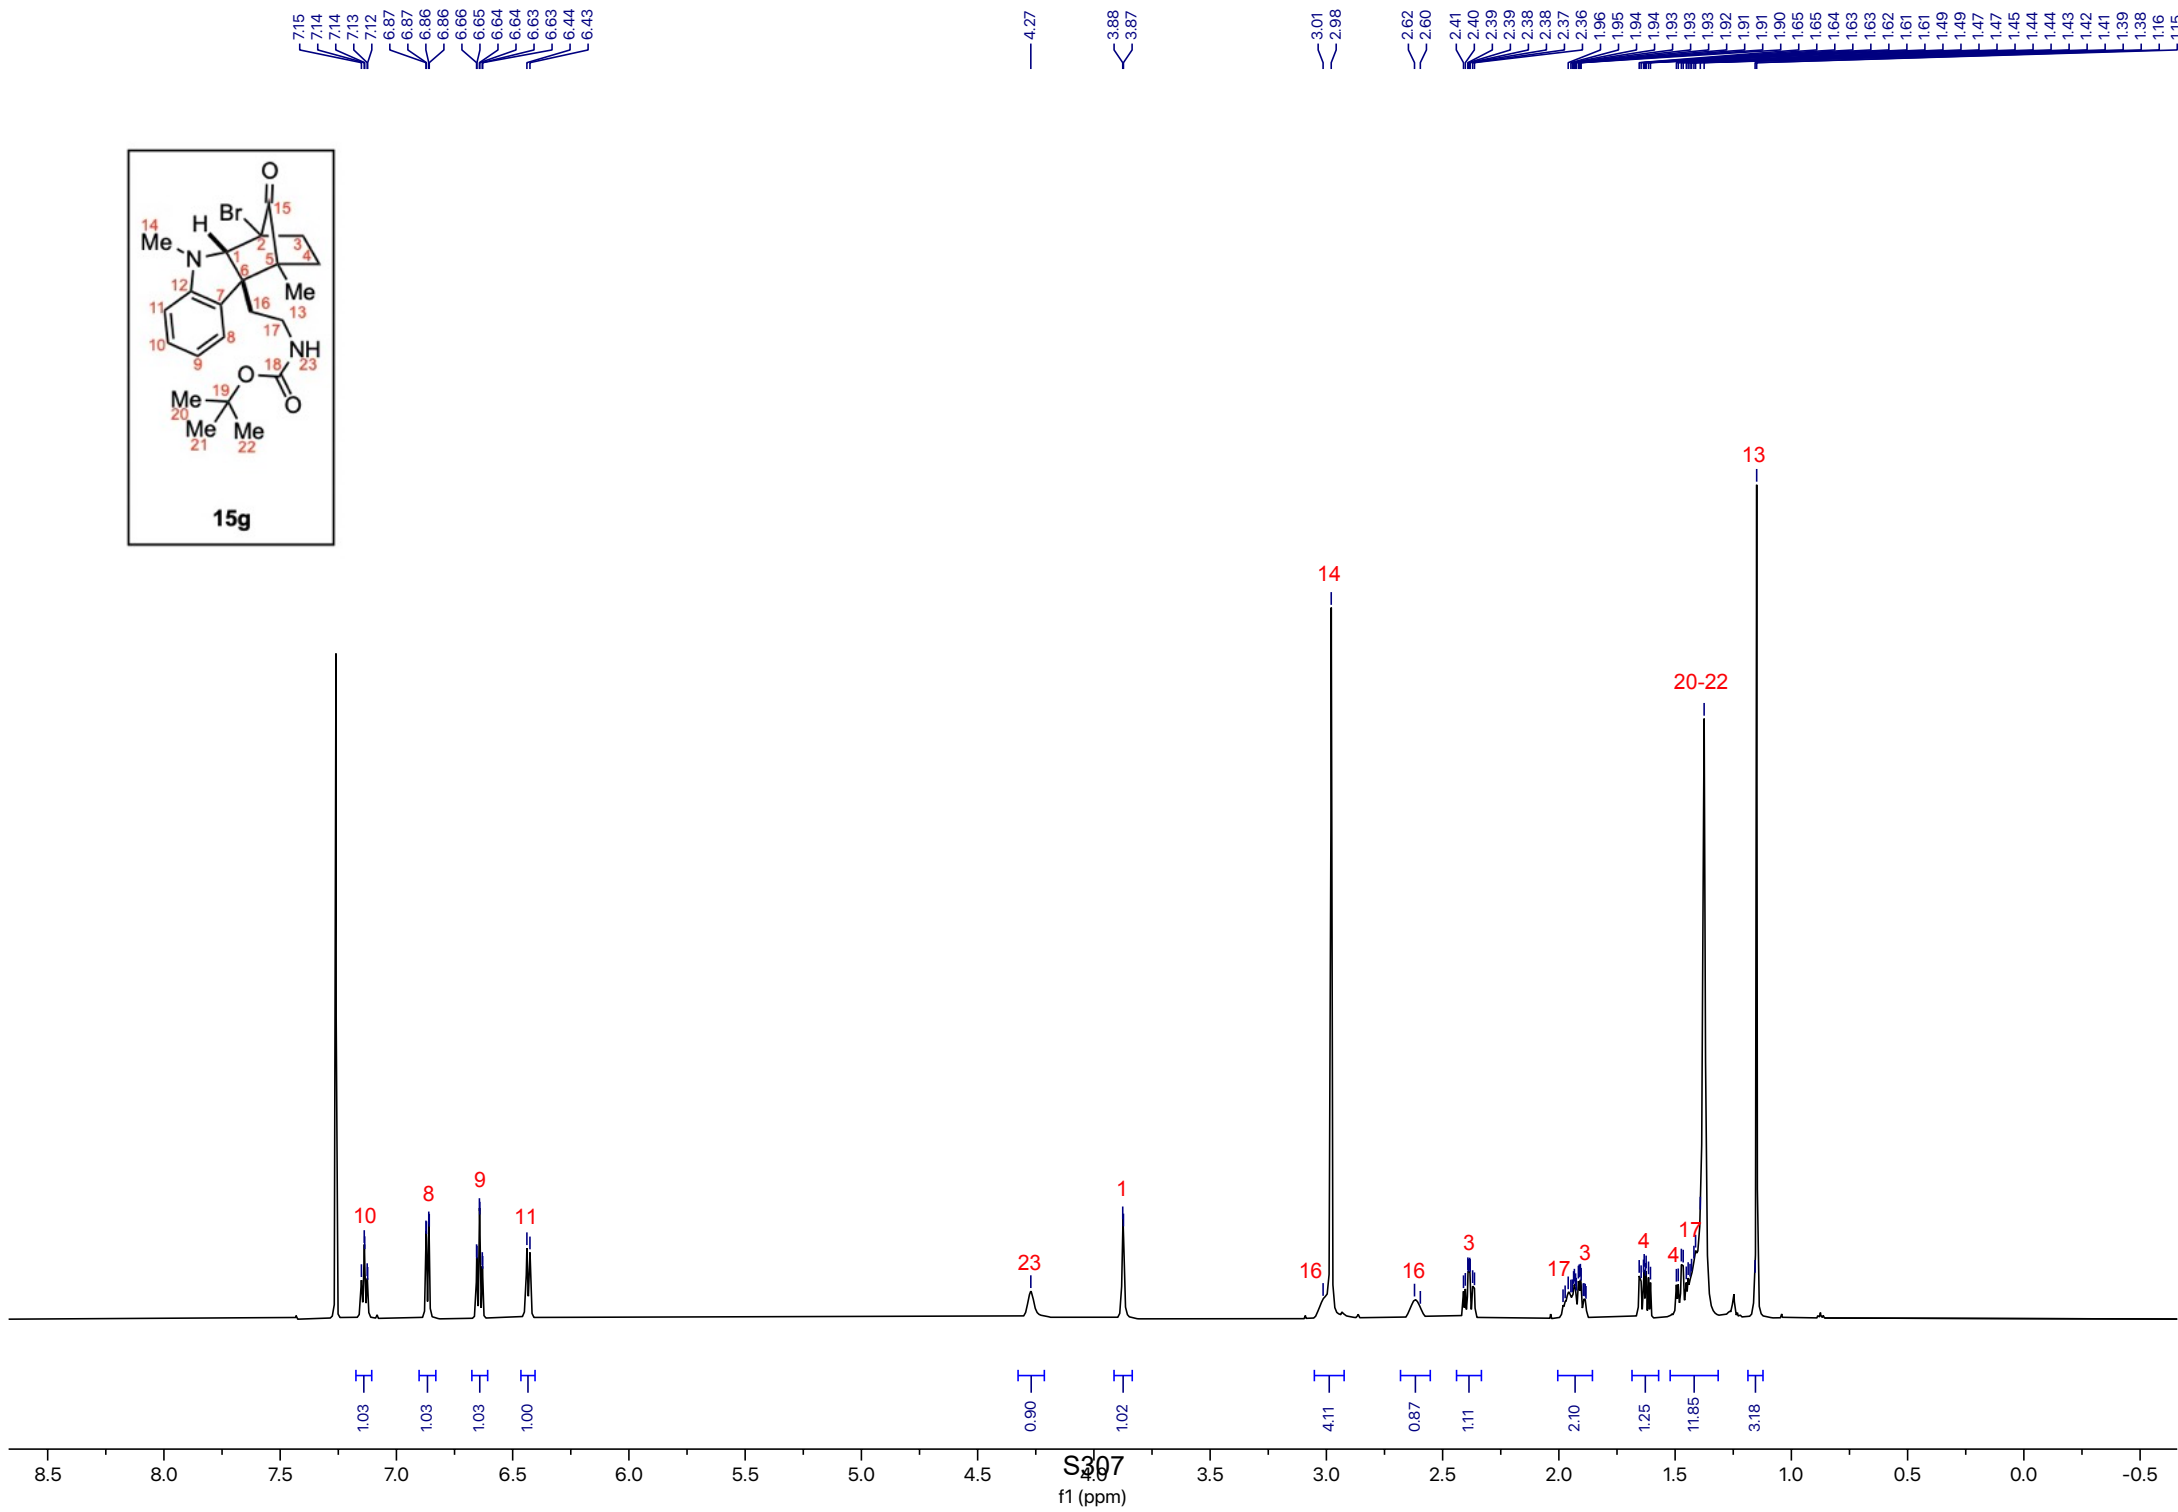

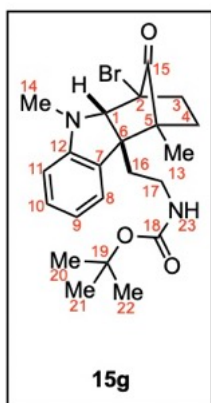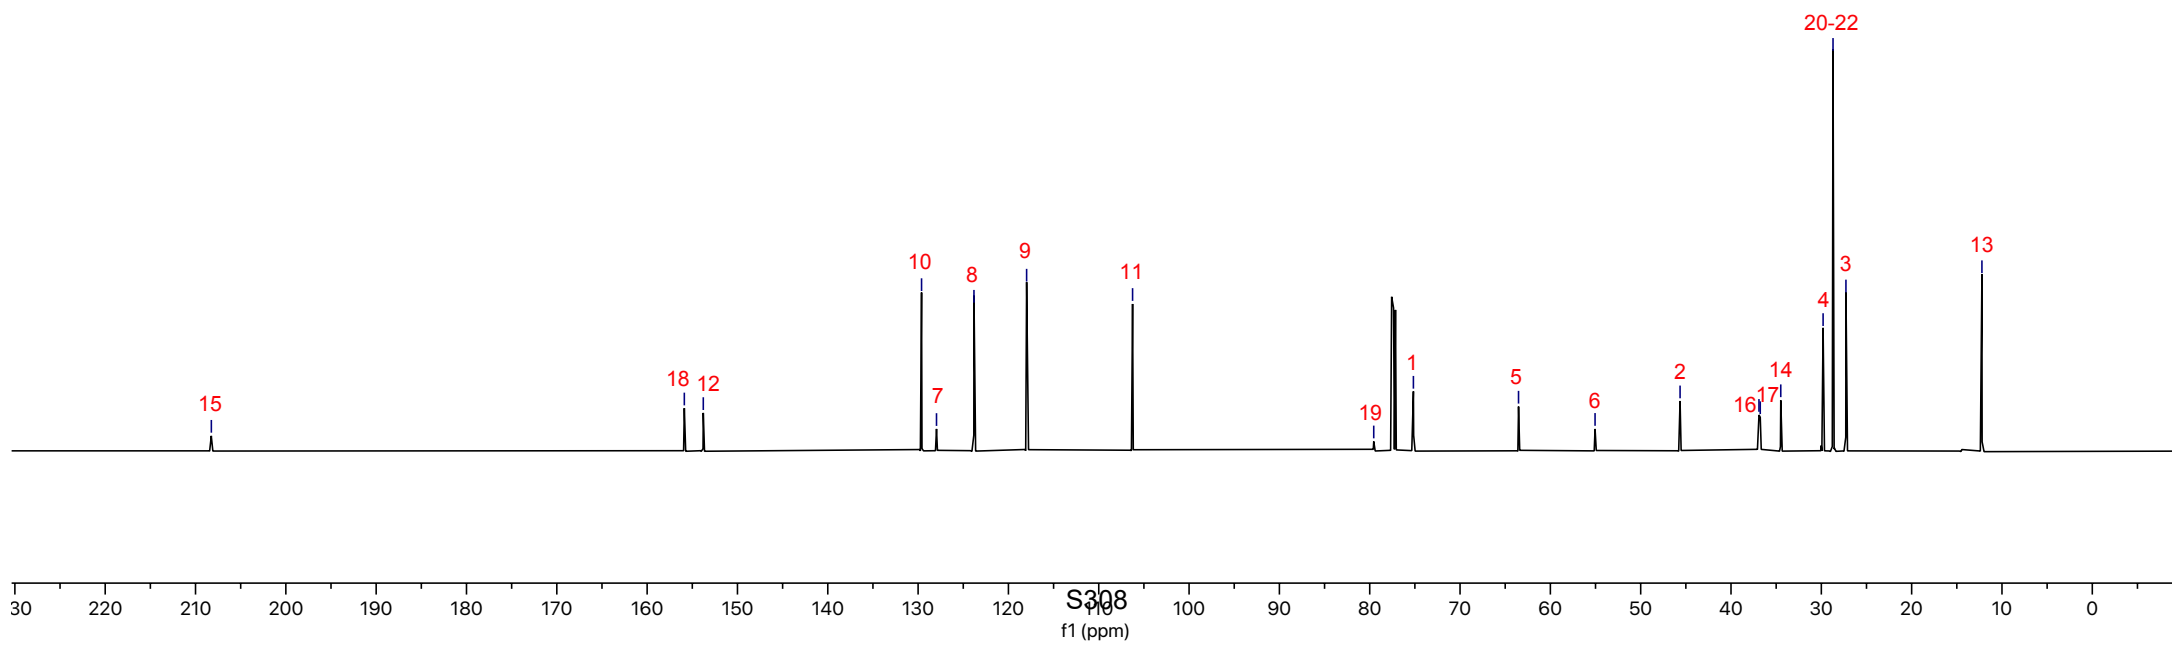

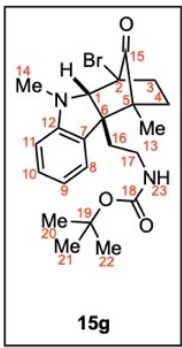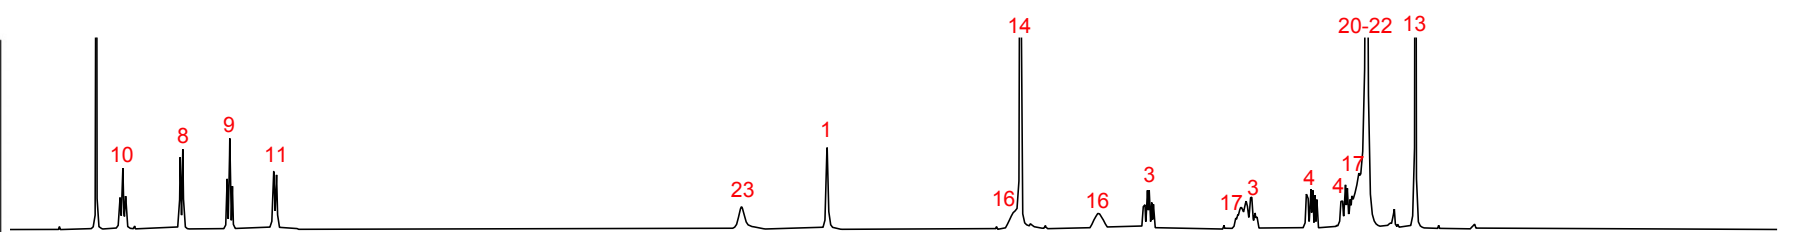

**COSY**

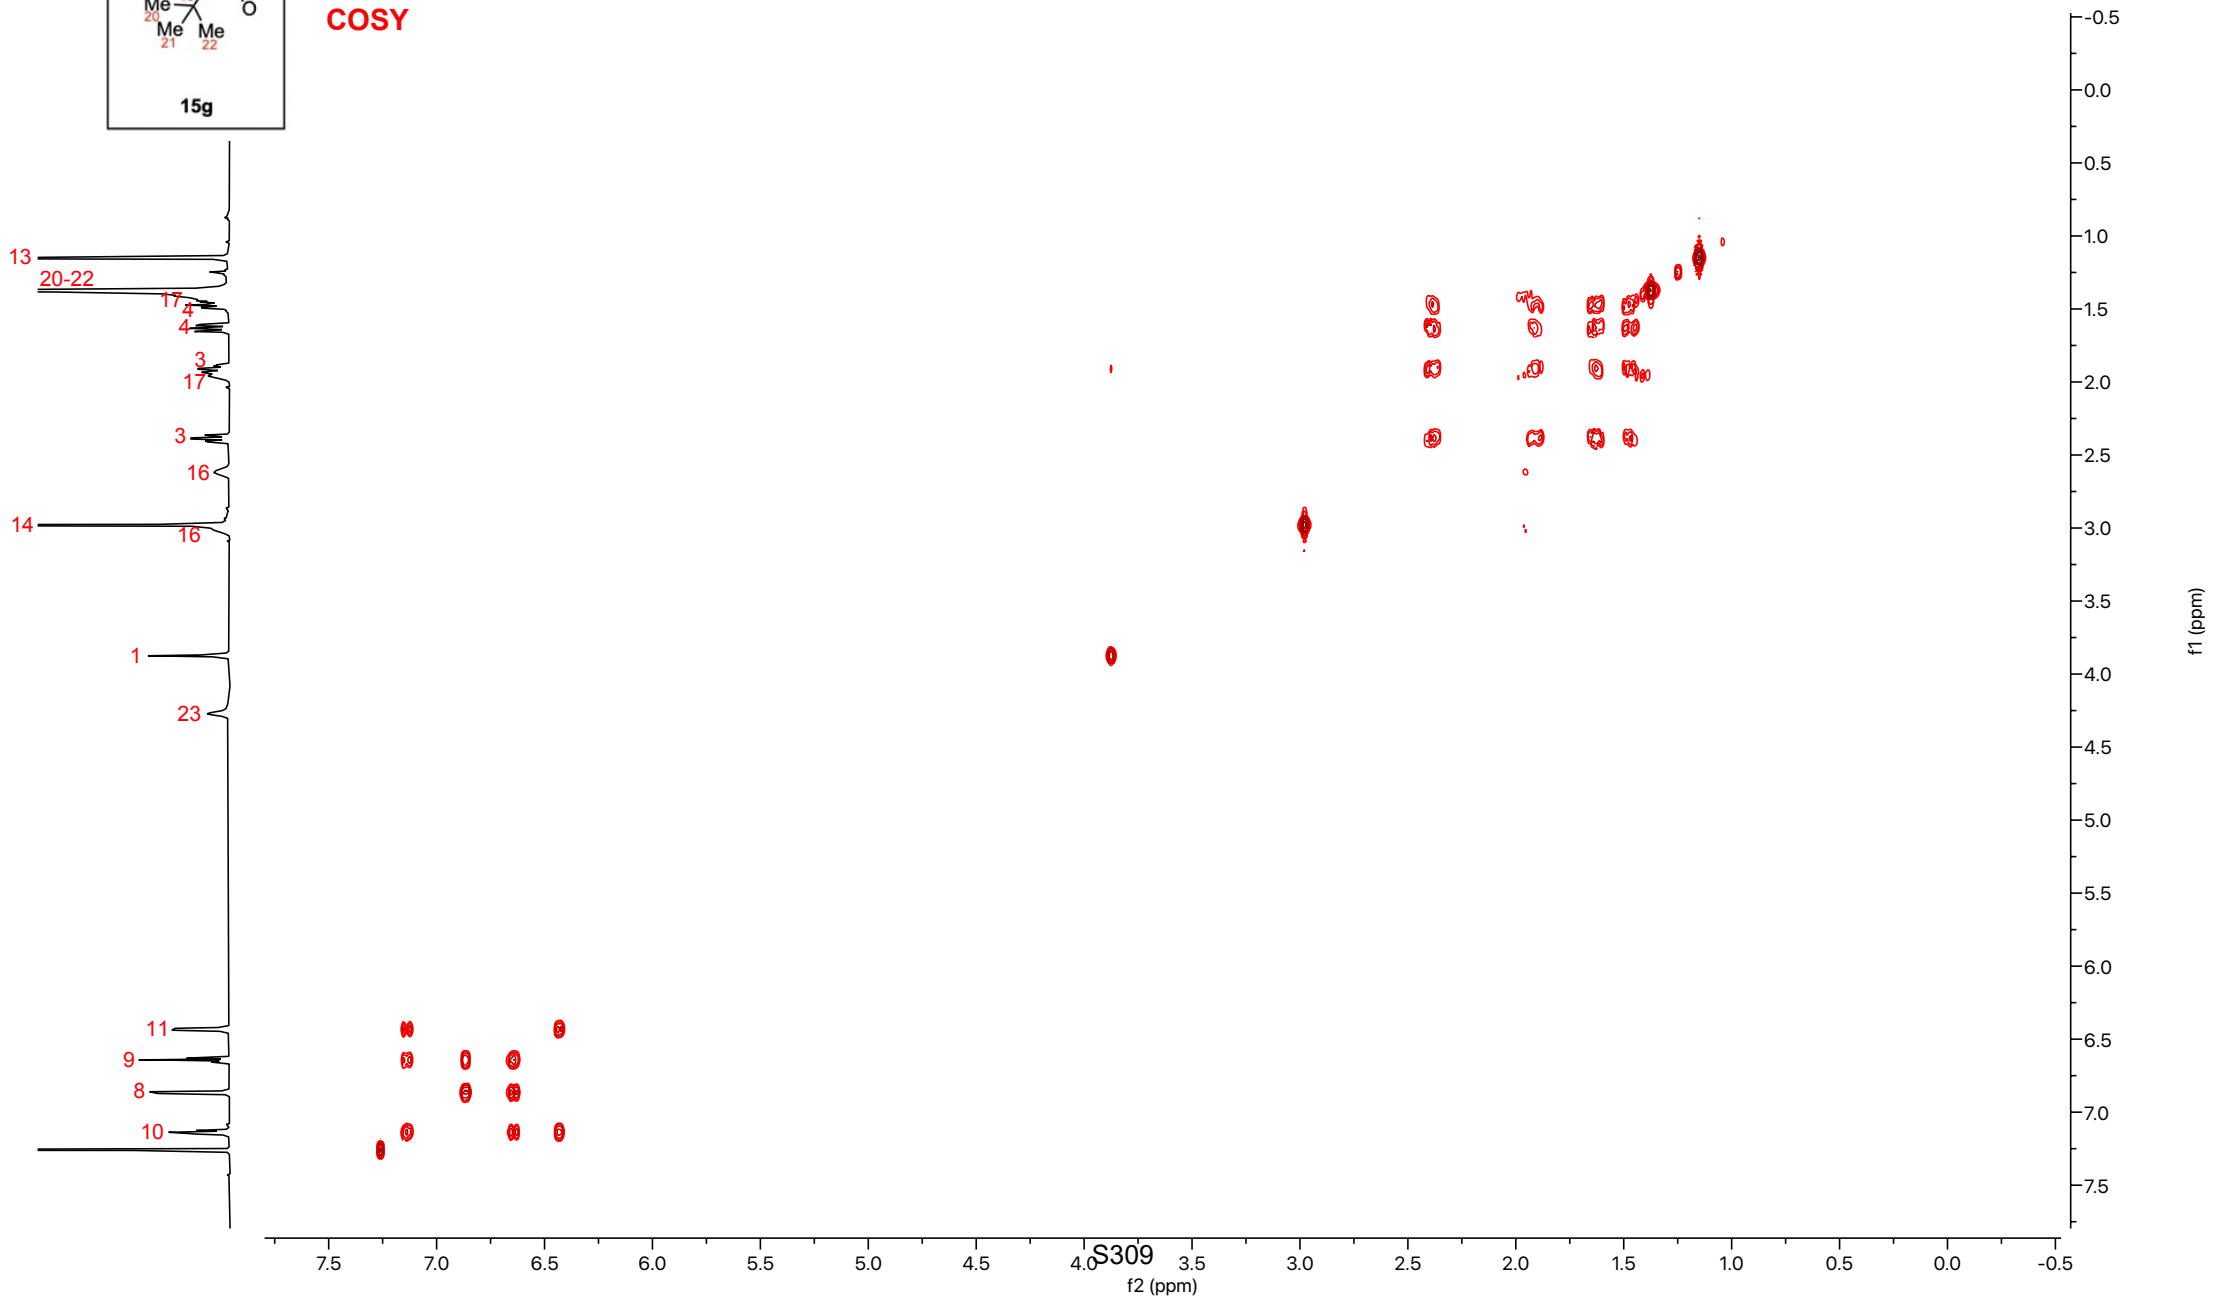

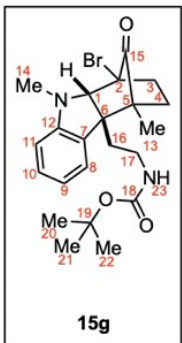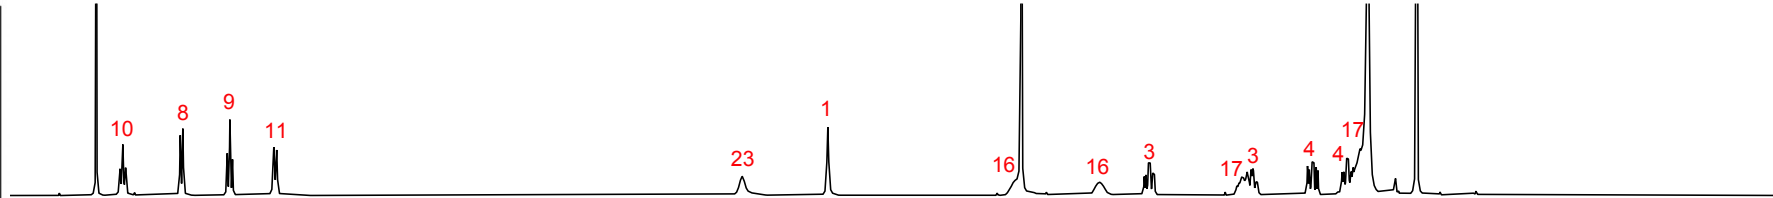

HSQC

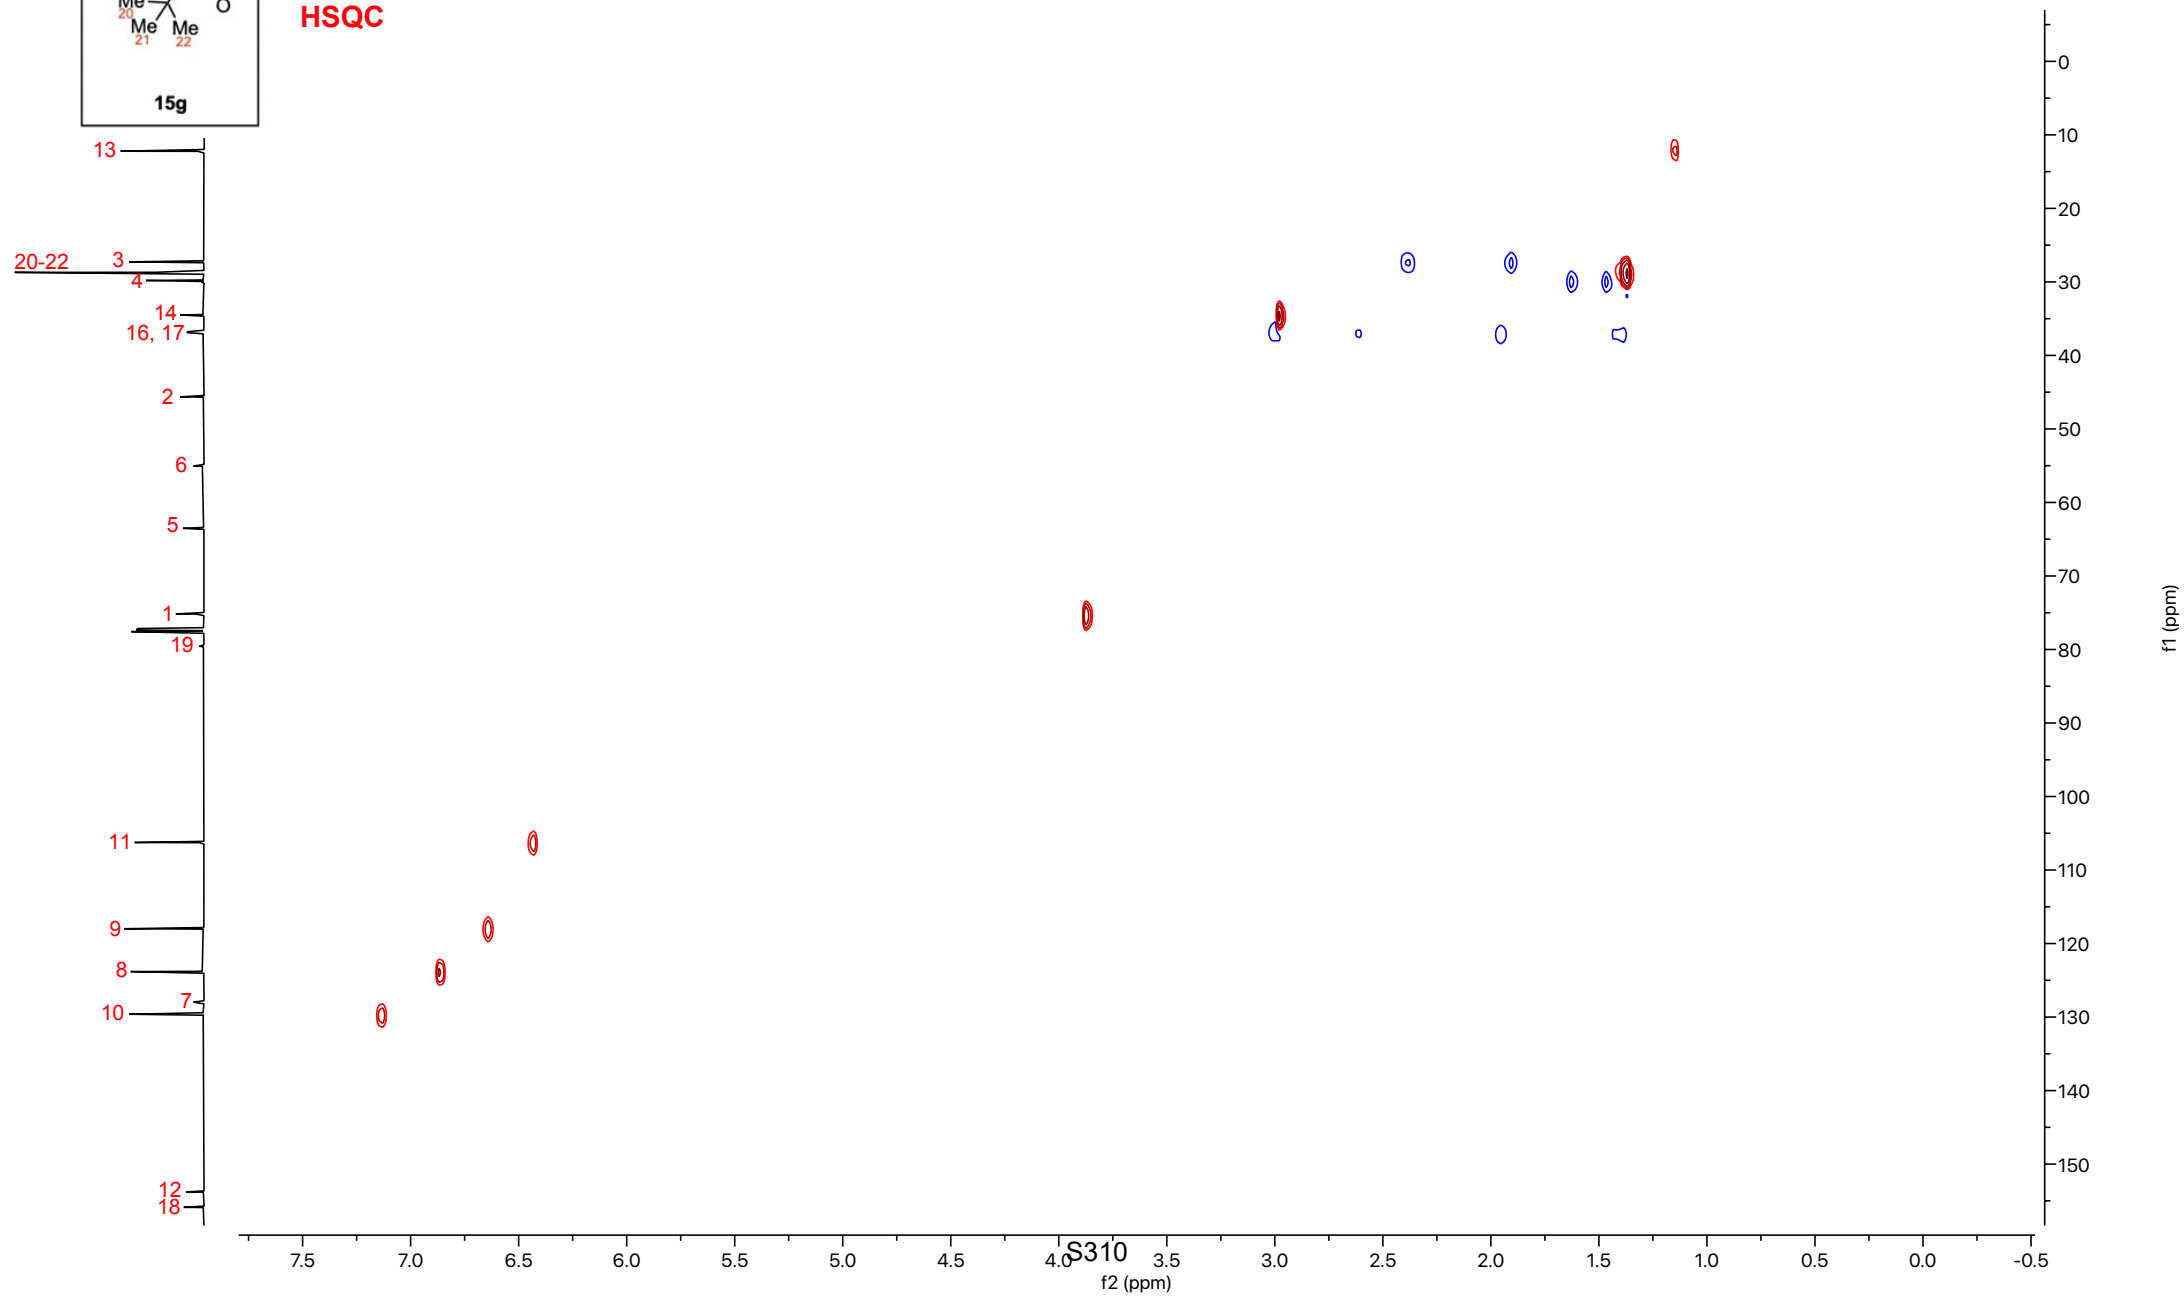

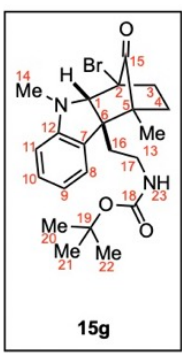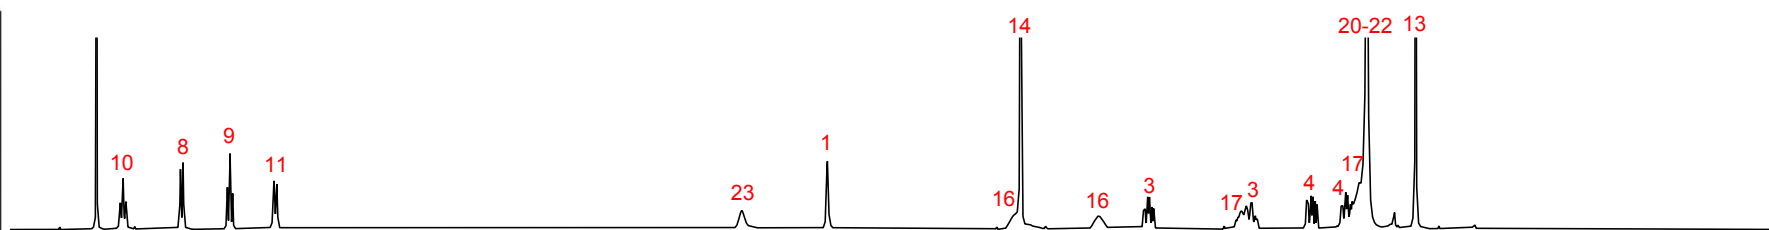

**HMBC**

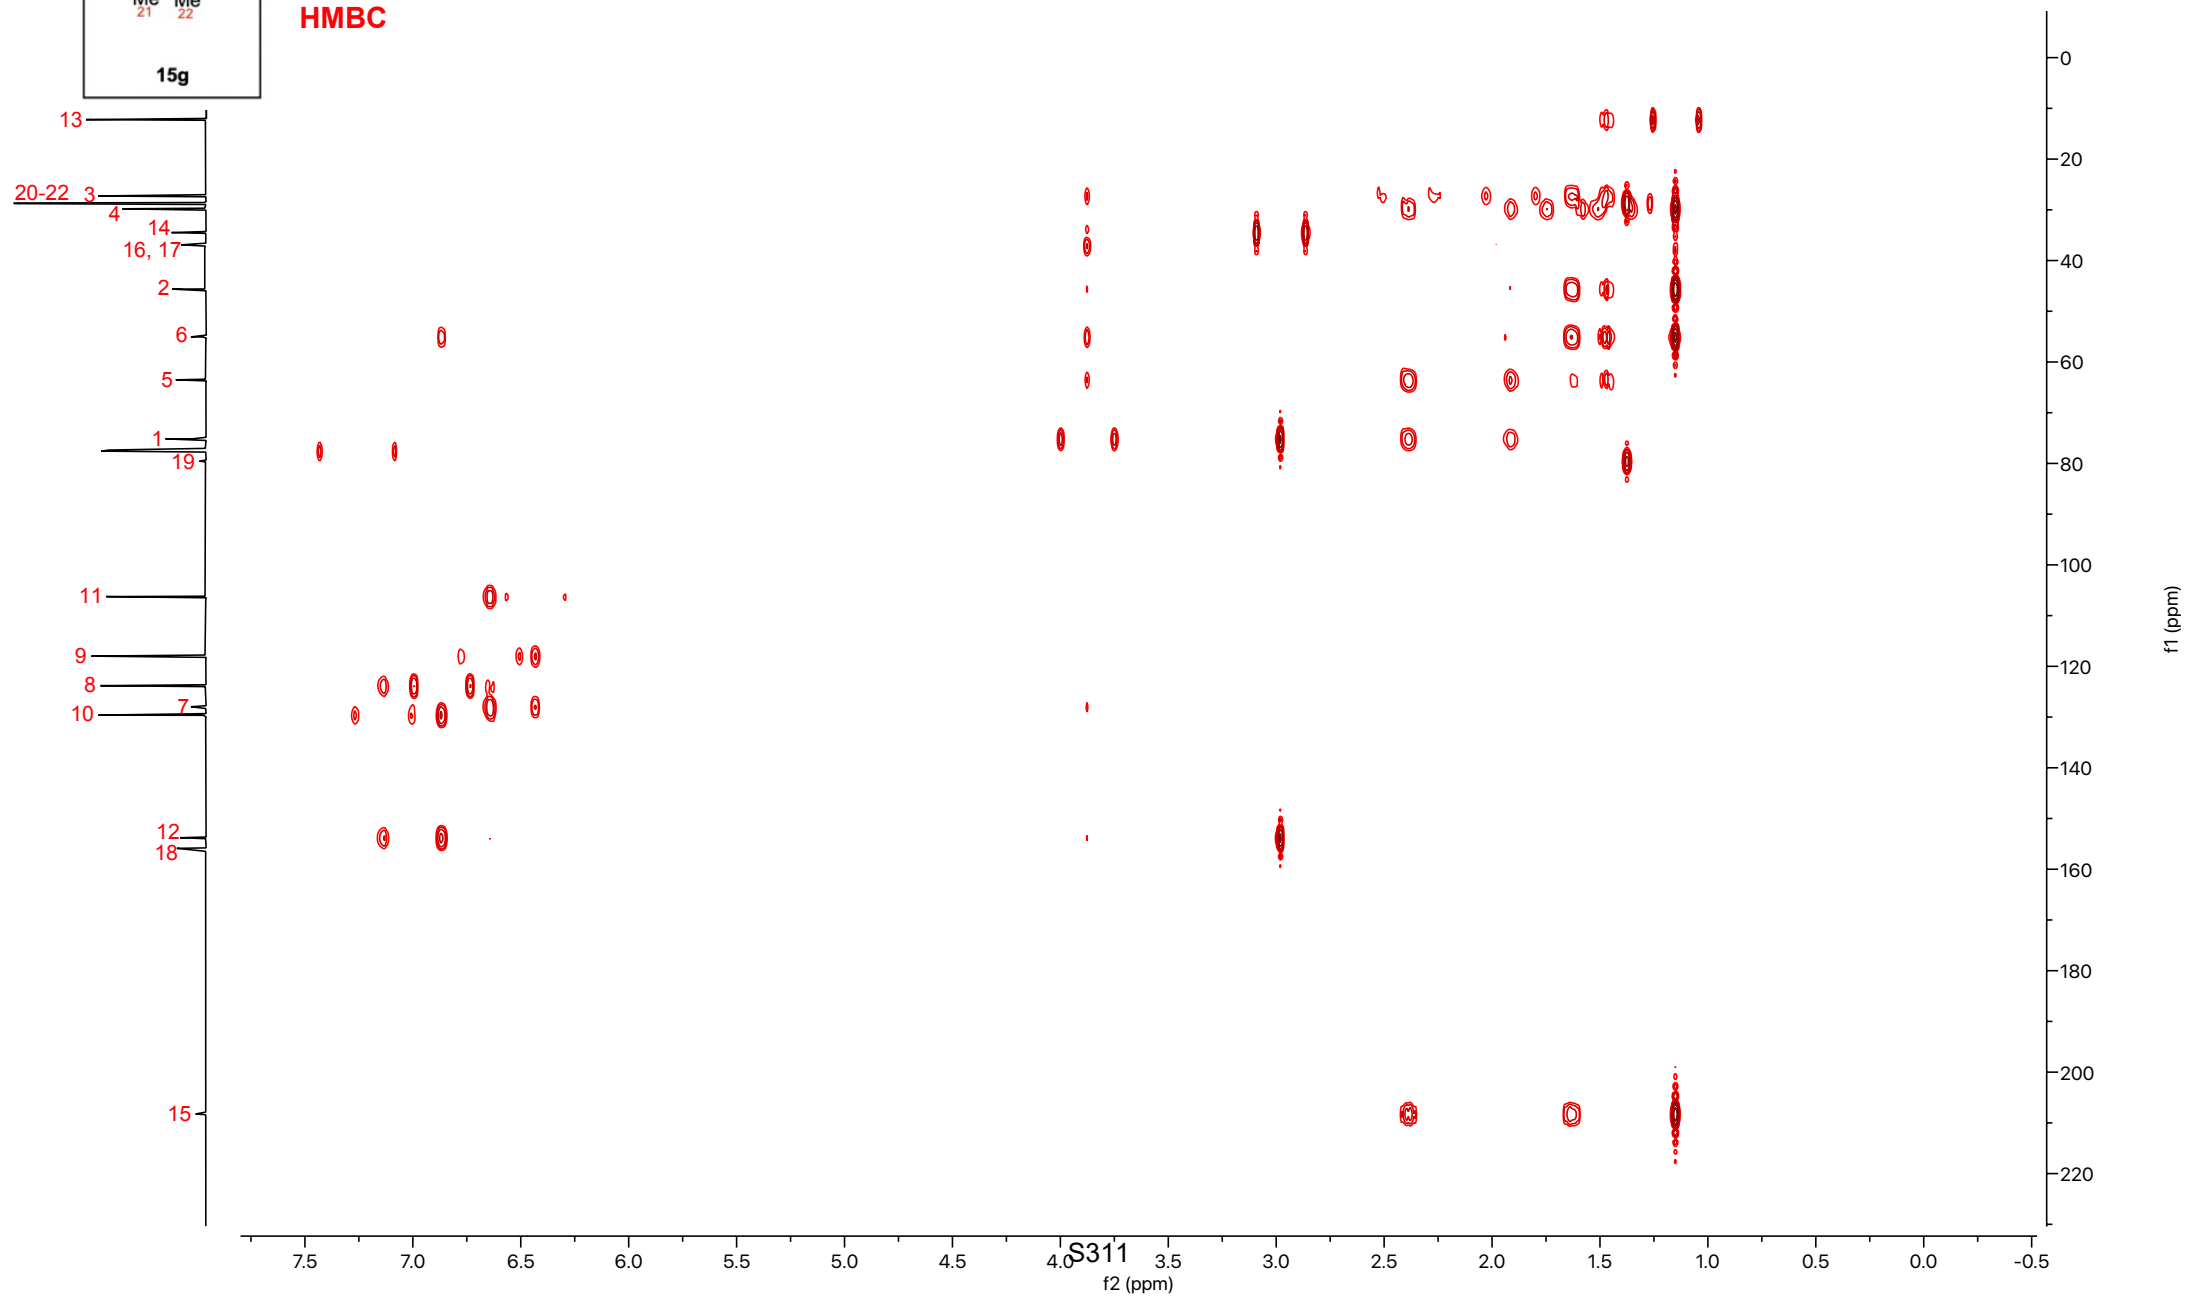



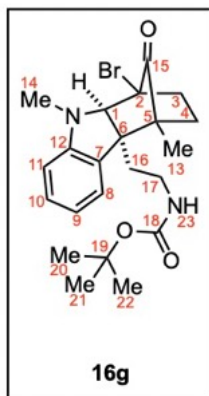

7.08  
7.07  
7.06  
7.05  
7.05  
6.84  
6.84  
6.83  
6.83  
6.64  
6.63  
6.62  
6.62  
6.61  
6.61  
6.37  
6.36

4.36

3.56

2.96

2.67  
2.66  
2.65  
2.31  
2.29  
2.28  
2.27  
2.26  
2.25  
2.24  
2.24  
2.22  
2.08  
2.07  
2.06  
2.04  
1.98  
1.98  
1.97  
1.96  
1.95  
1.94  
1.71  
1.70  
1.70  
1.69  
1.68  
1.68  
1.49  
1.45  
1.45  
1.44  
1.44  
1.42  
1.40  
1.38  
1.15  
1.13

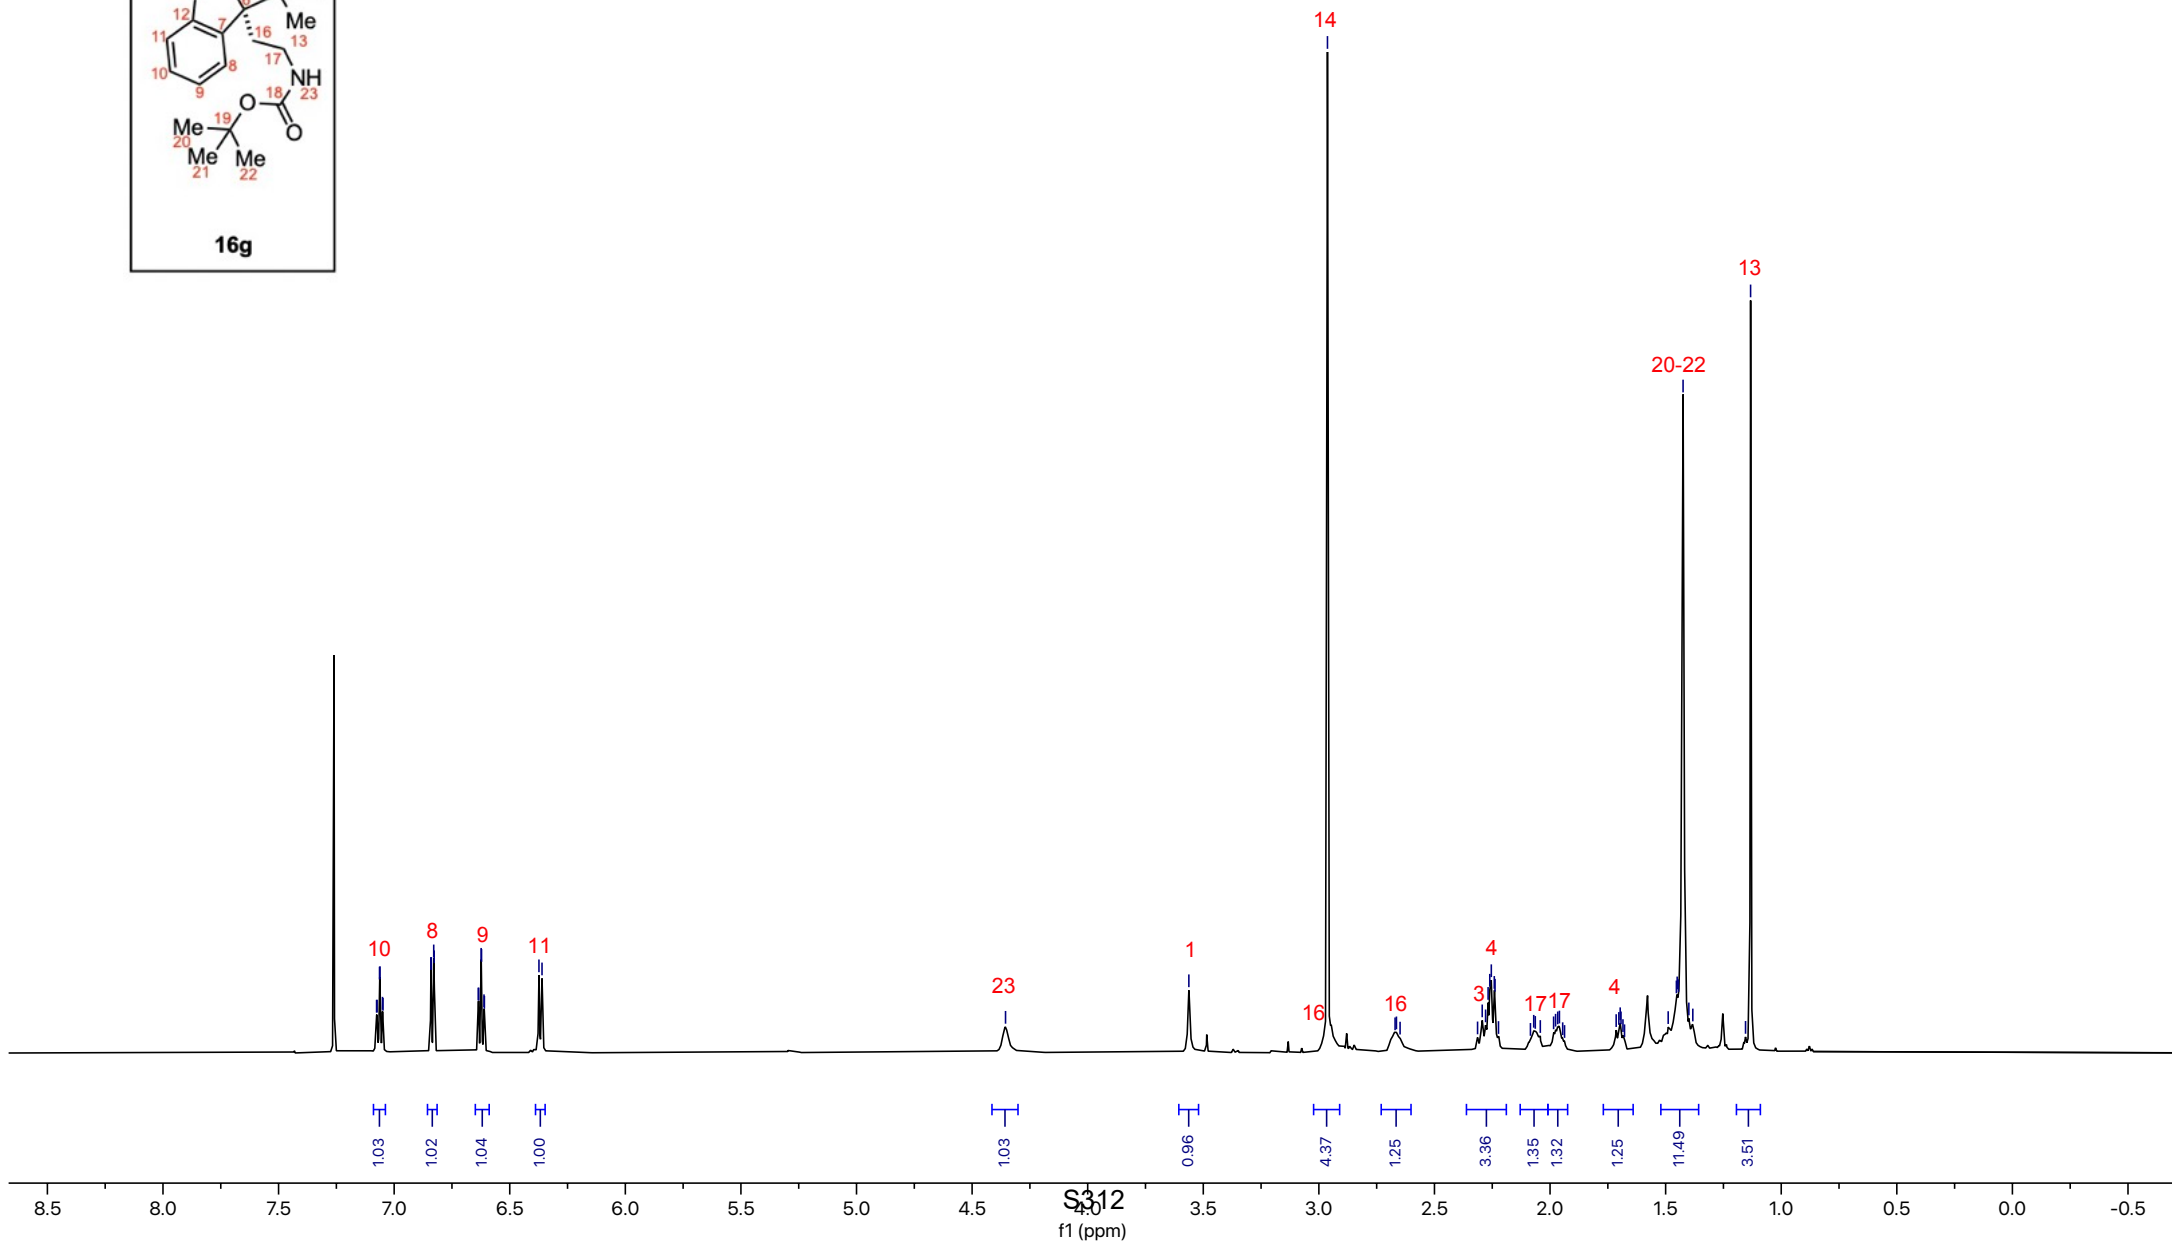

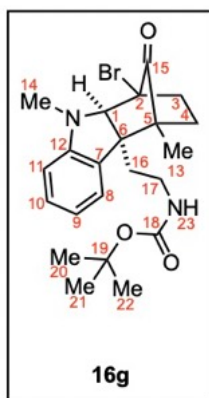

— 207.71

— 156.10  
— 153.04

— 129.58  
— 127.89  
— 125.83

— 118.17

— 108.38

— 79.77  
— 78.09

— 66.04

— 55.22

— 45.44

— 38.48  
— 37.20  
— 34.57  
— 31.38  
— 28.77  
— 28.72  
— 28.05

— 12.46

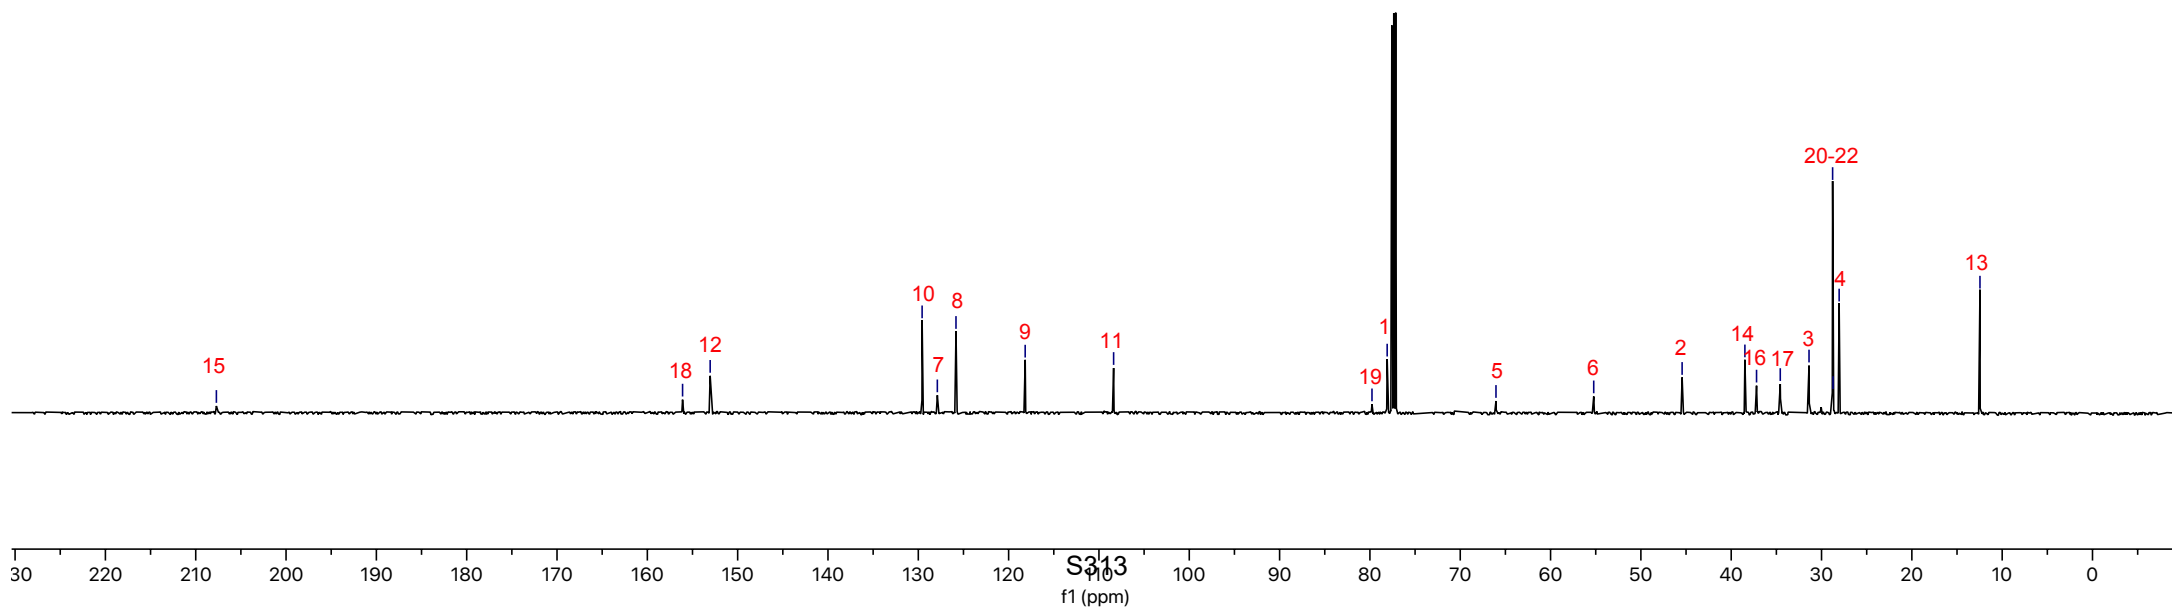

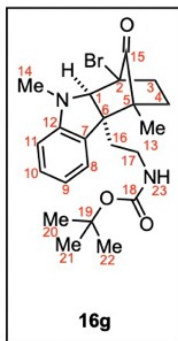

**COSY**

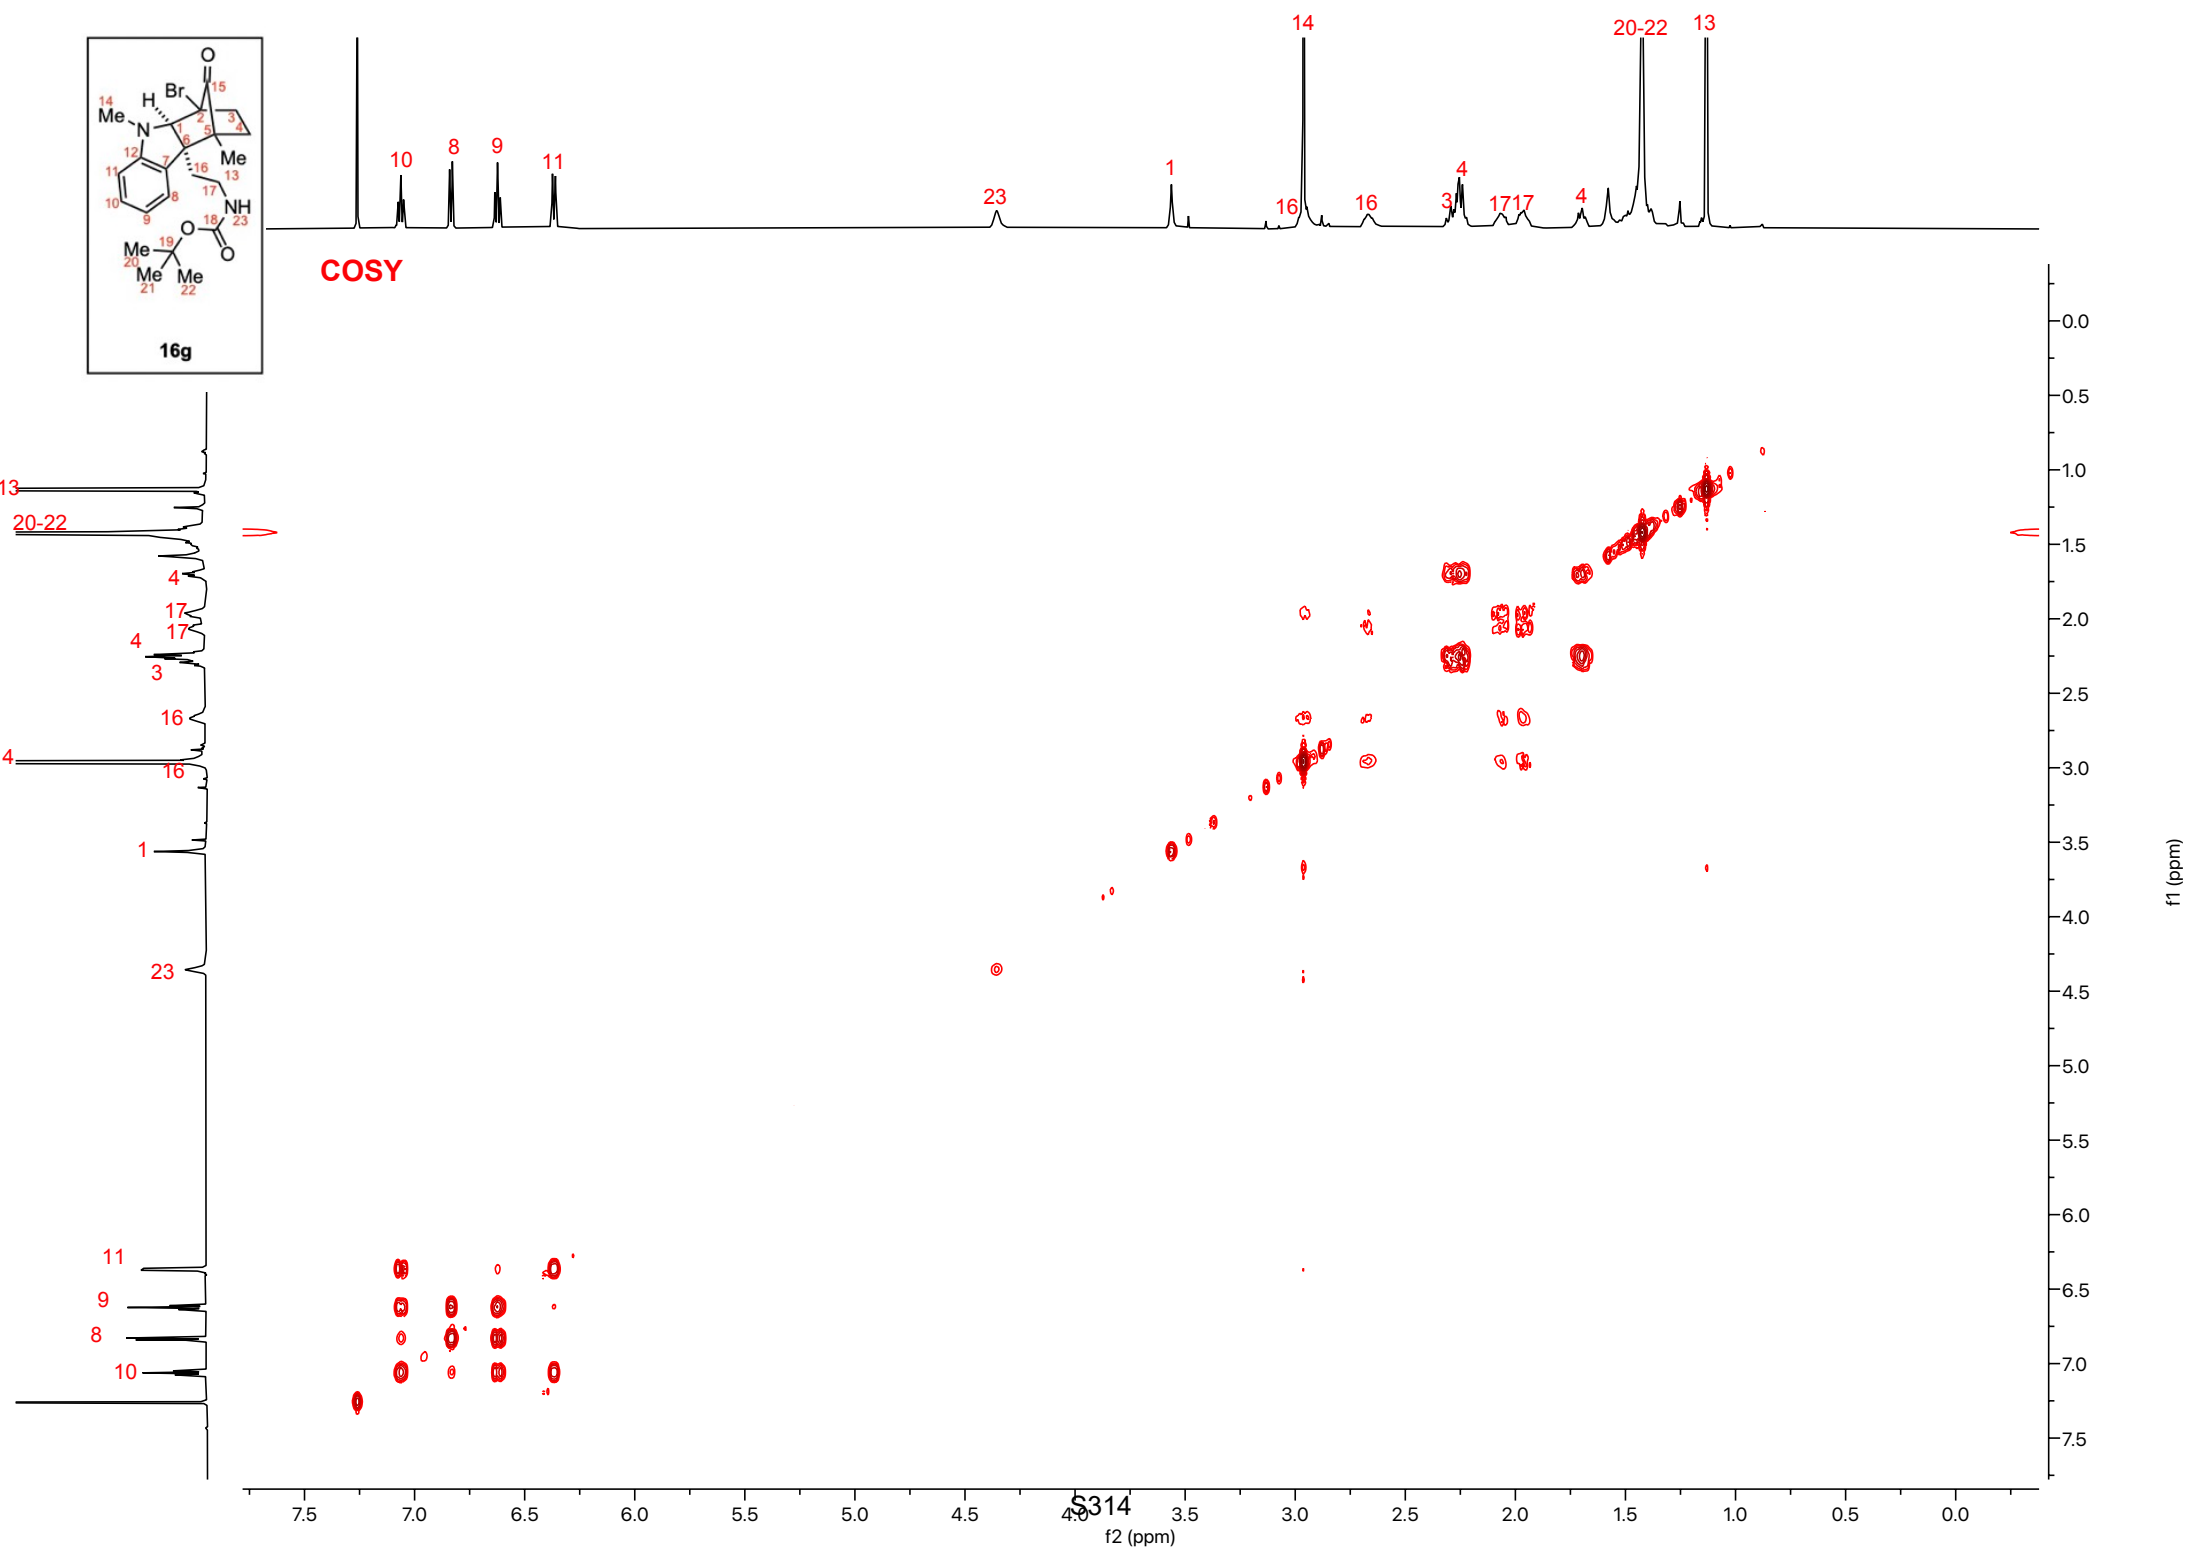

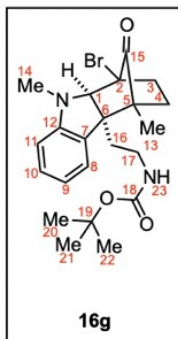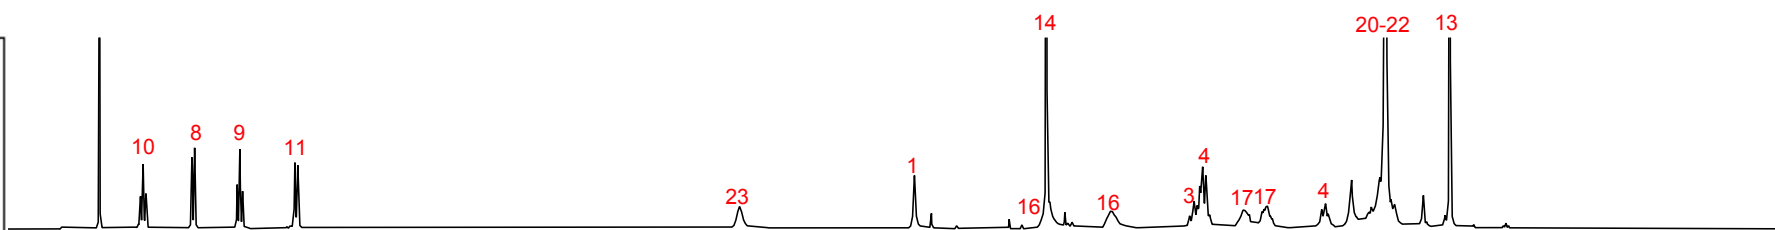

**HSQC**

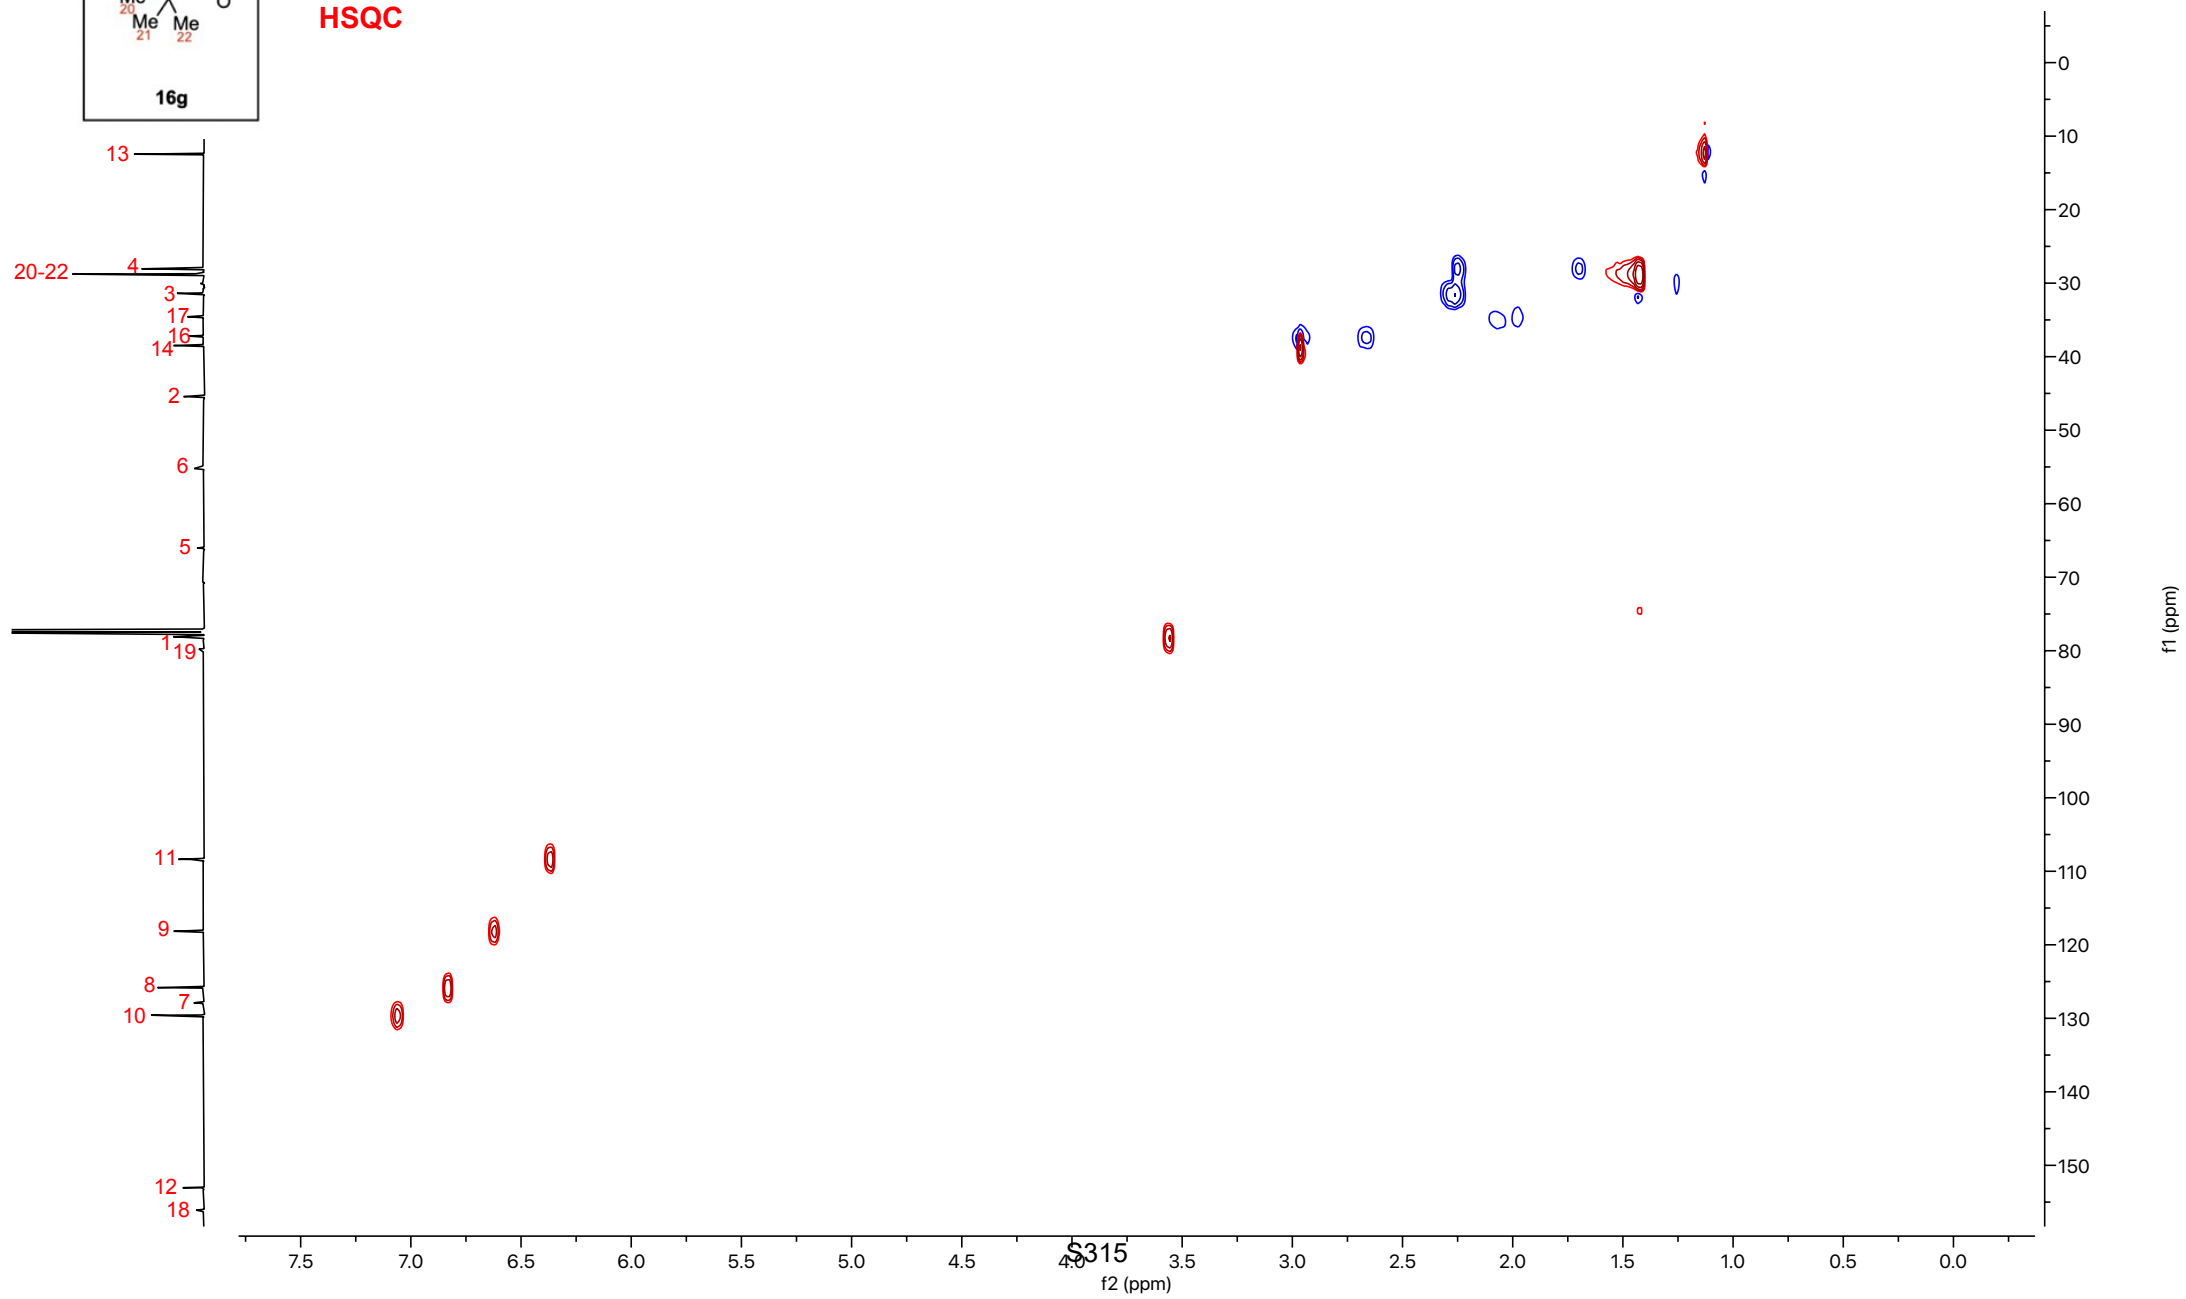

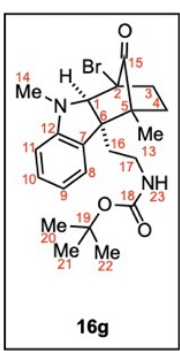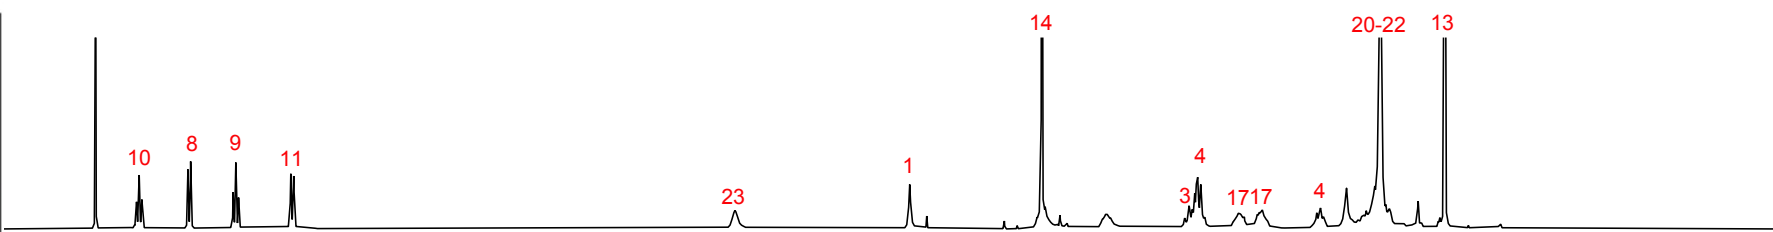

**HMBC**

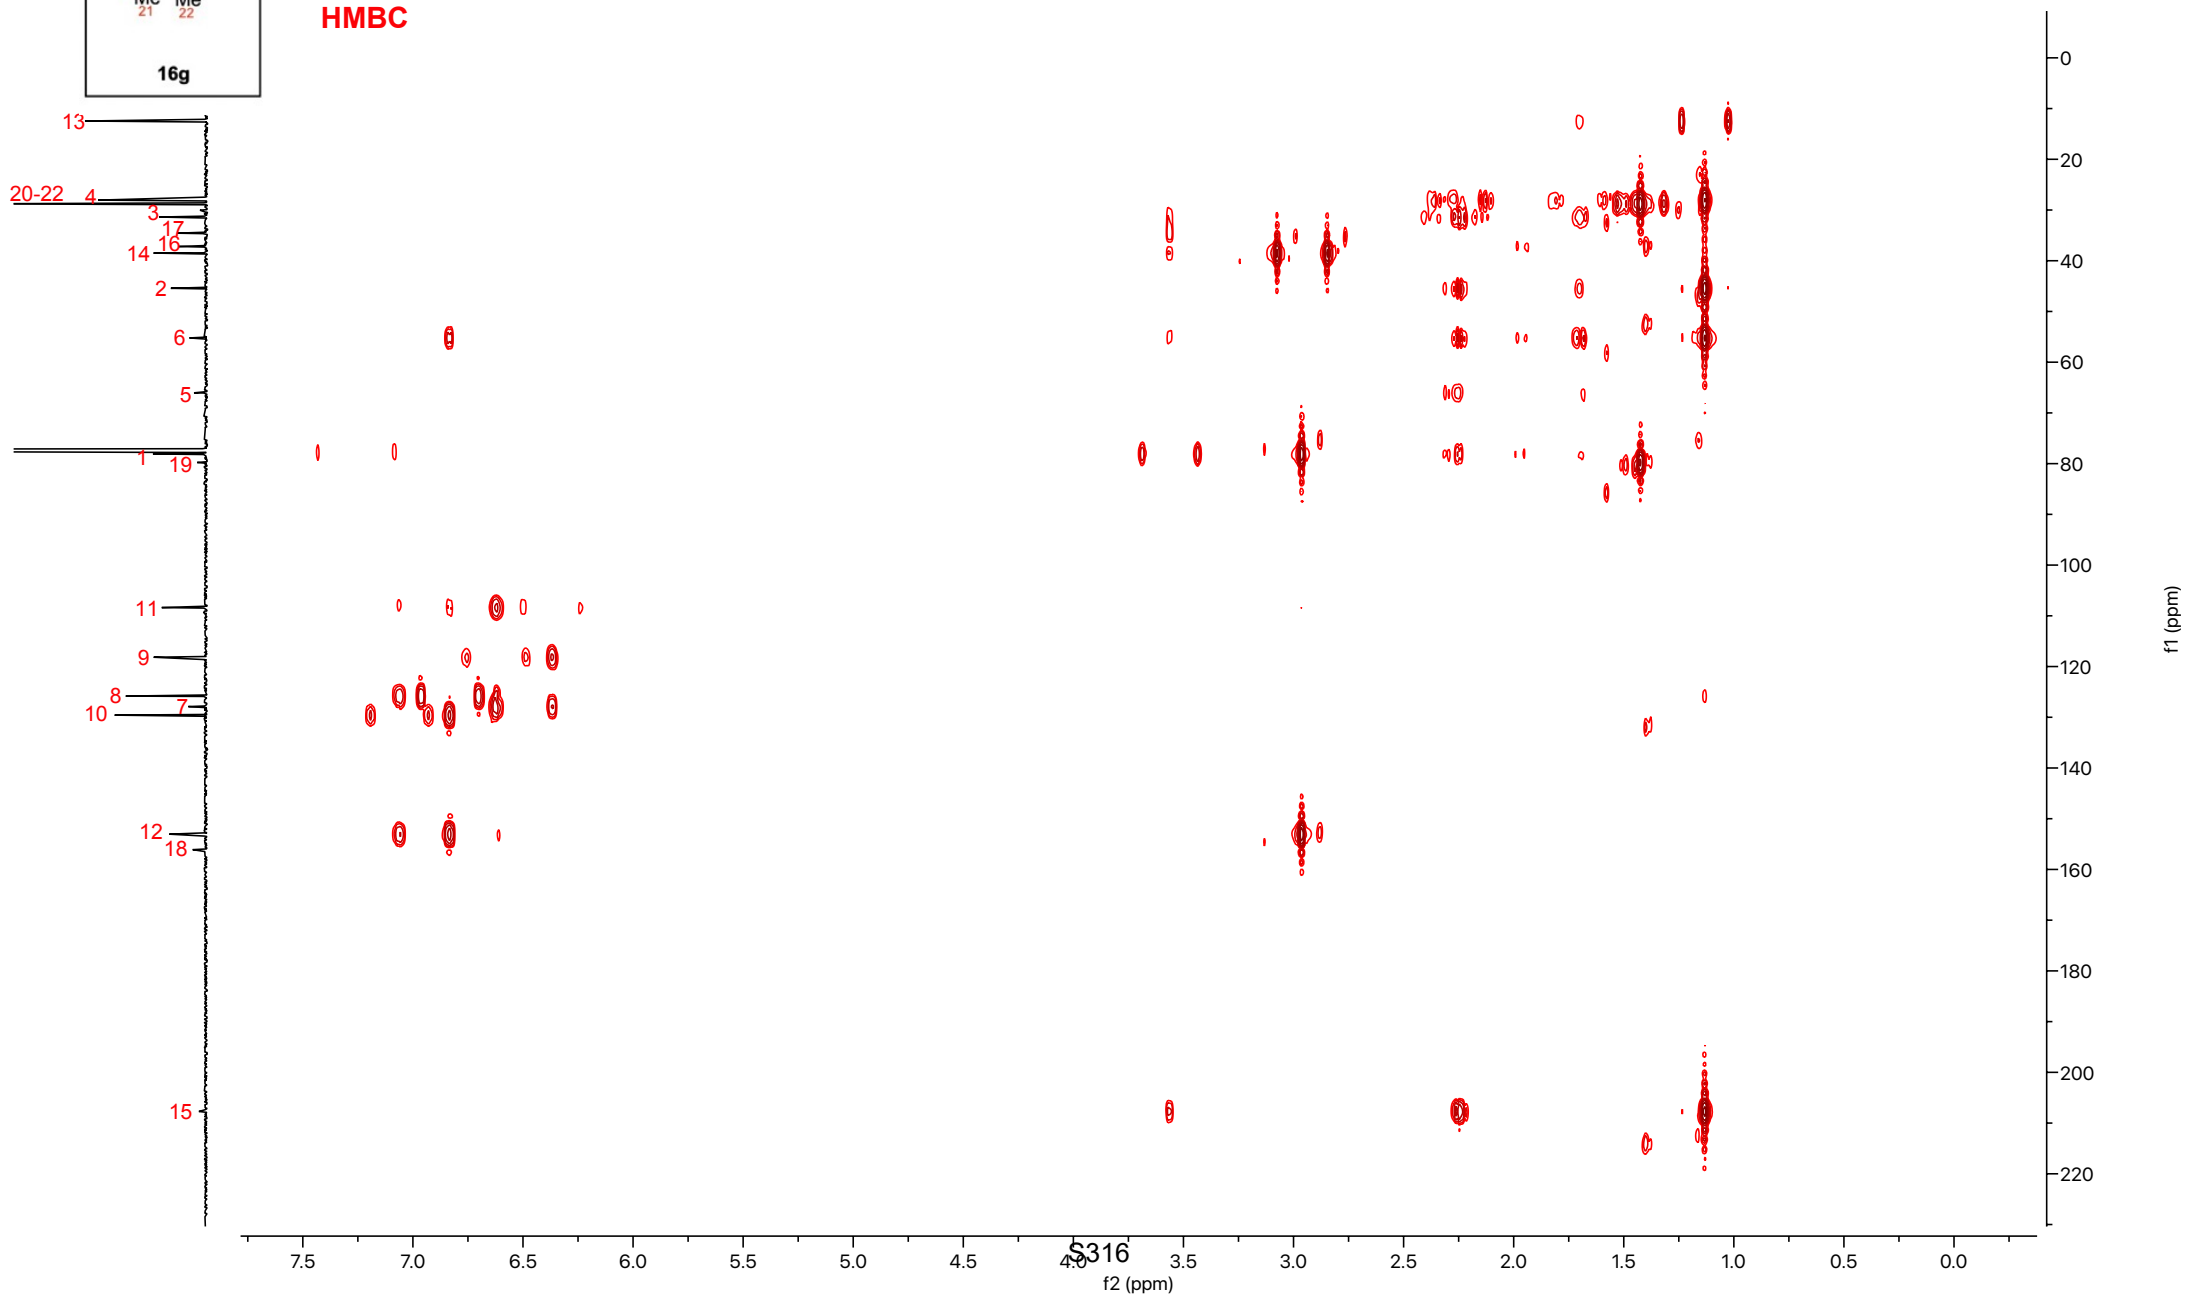

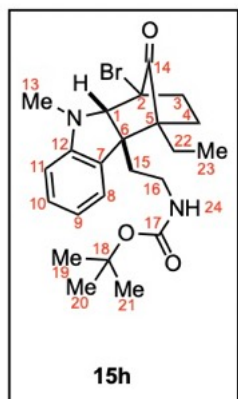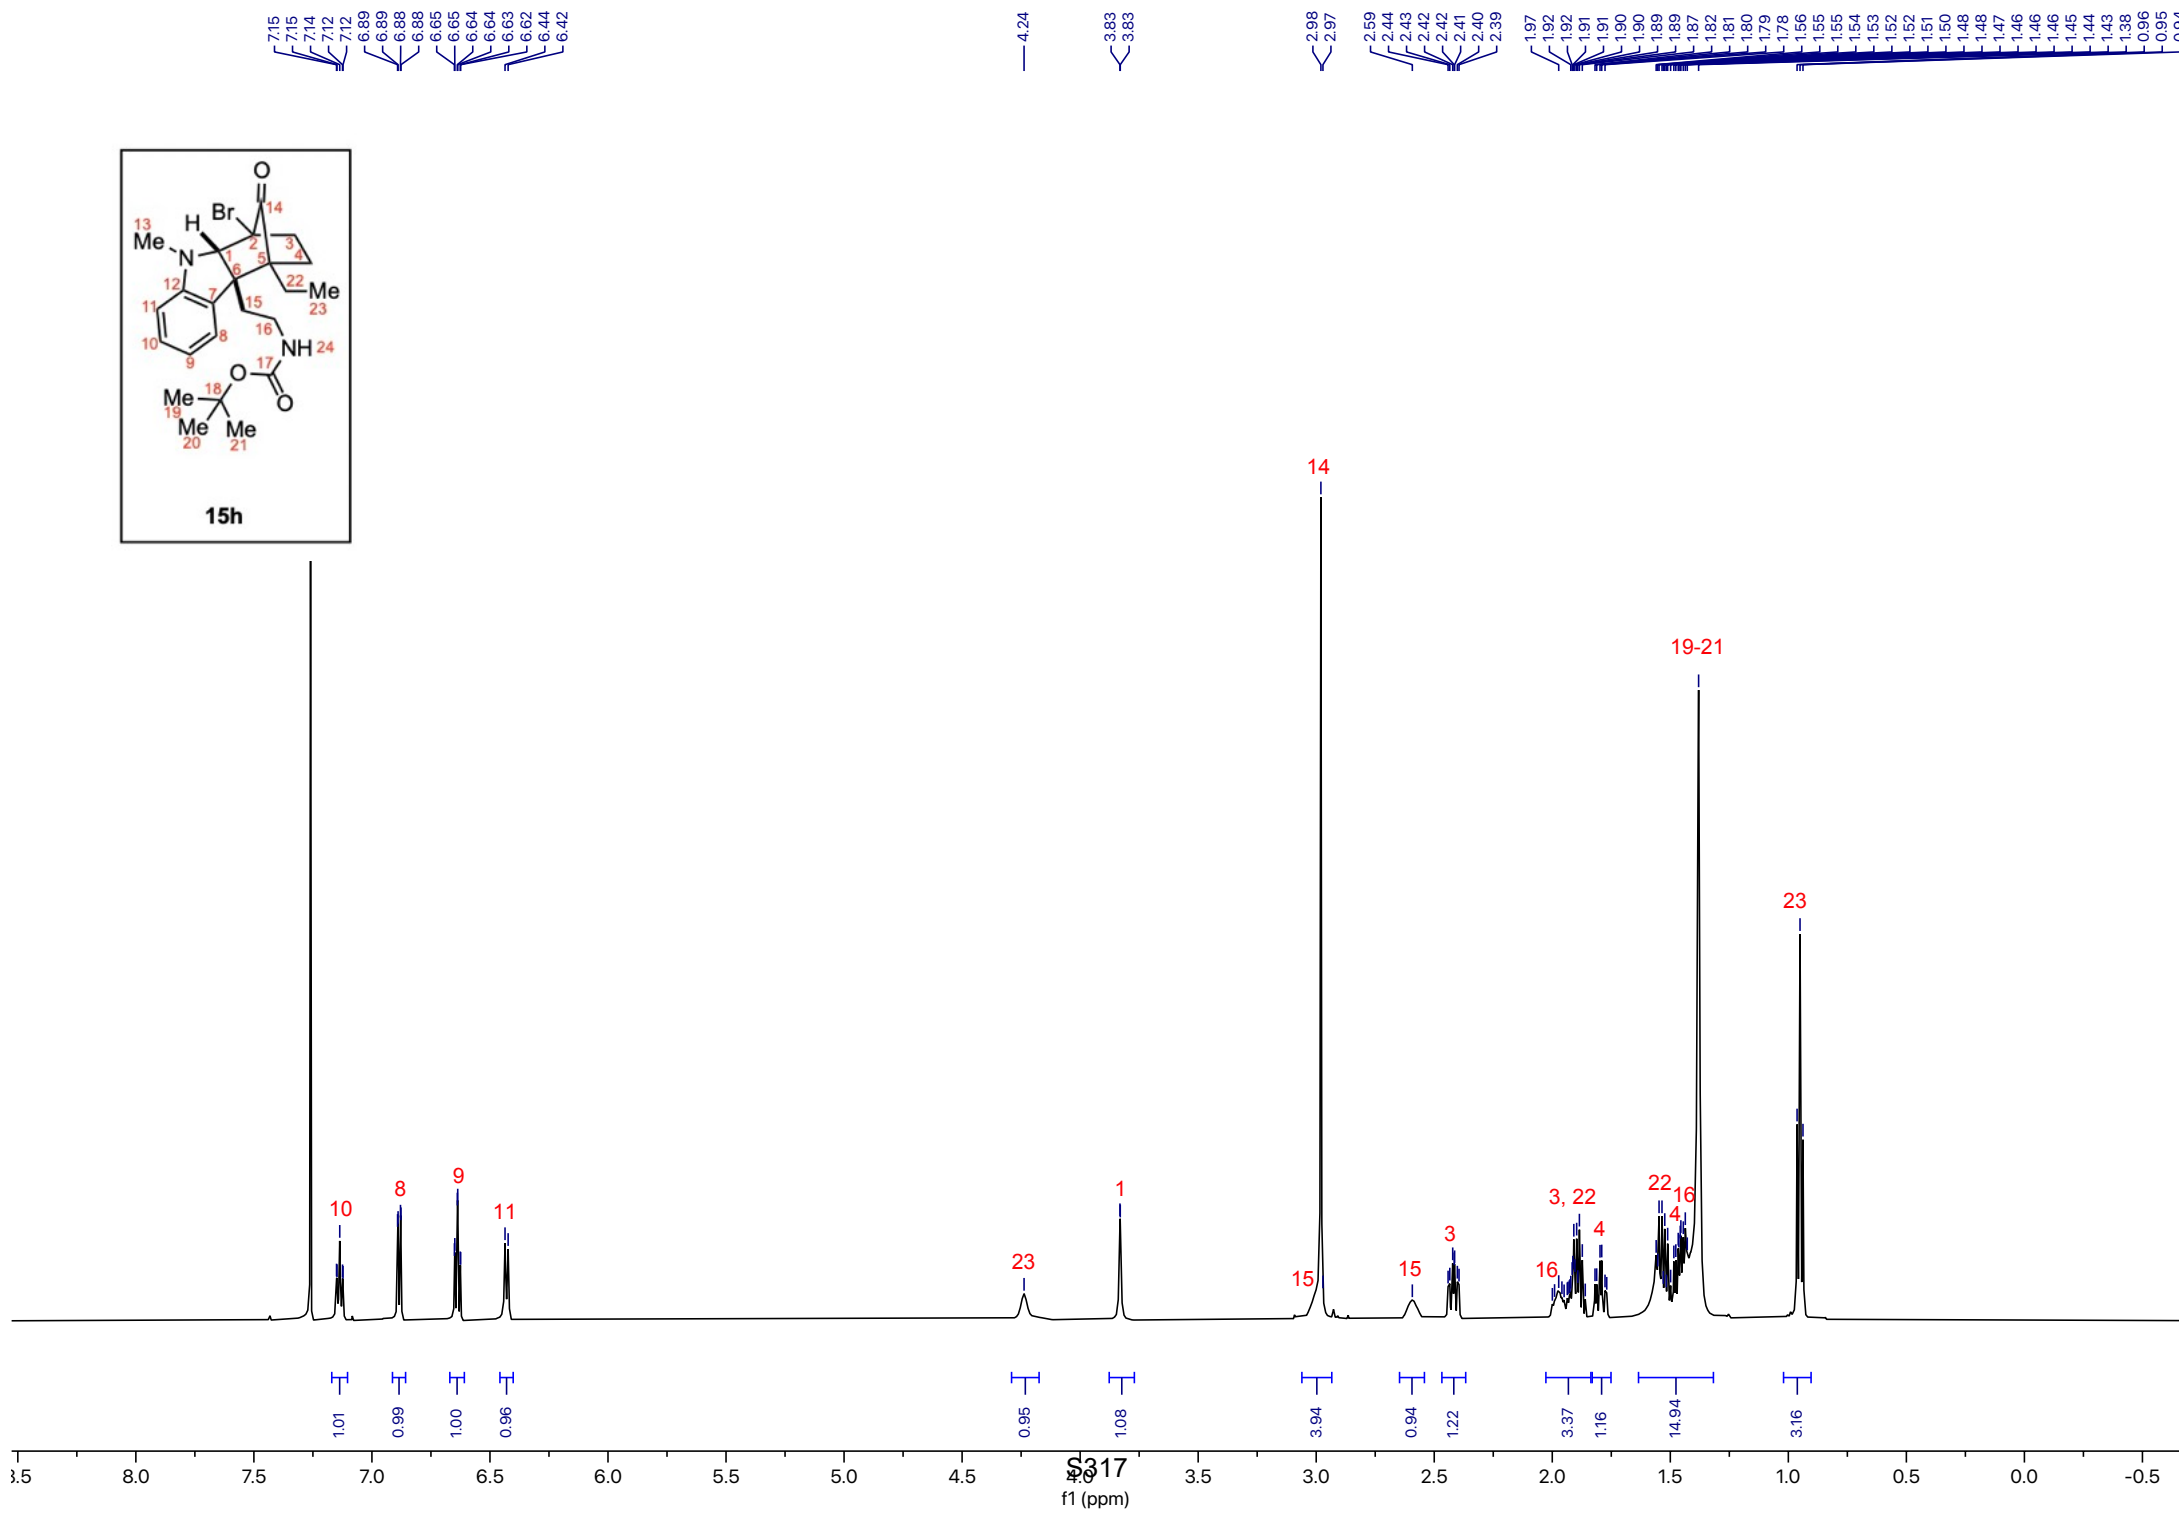

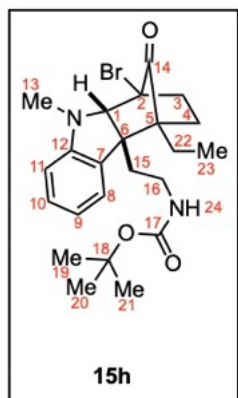

— 207.94

— 155.91  
— 154.02

— 129.59  
— 127.95  
— 124.56

— 117.93

— 106.24

— 79.60  
— 75.18

— 63.76

— 56.04  
— 49.14

— 36.83  
— 36.64  
— 34.53

— 28.73  
— 27.11  
— 24.31

— 18.61

— 9.53

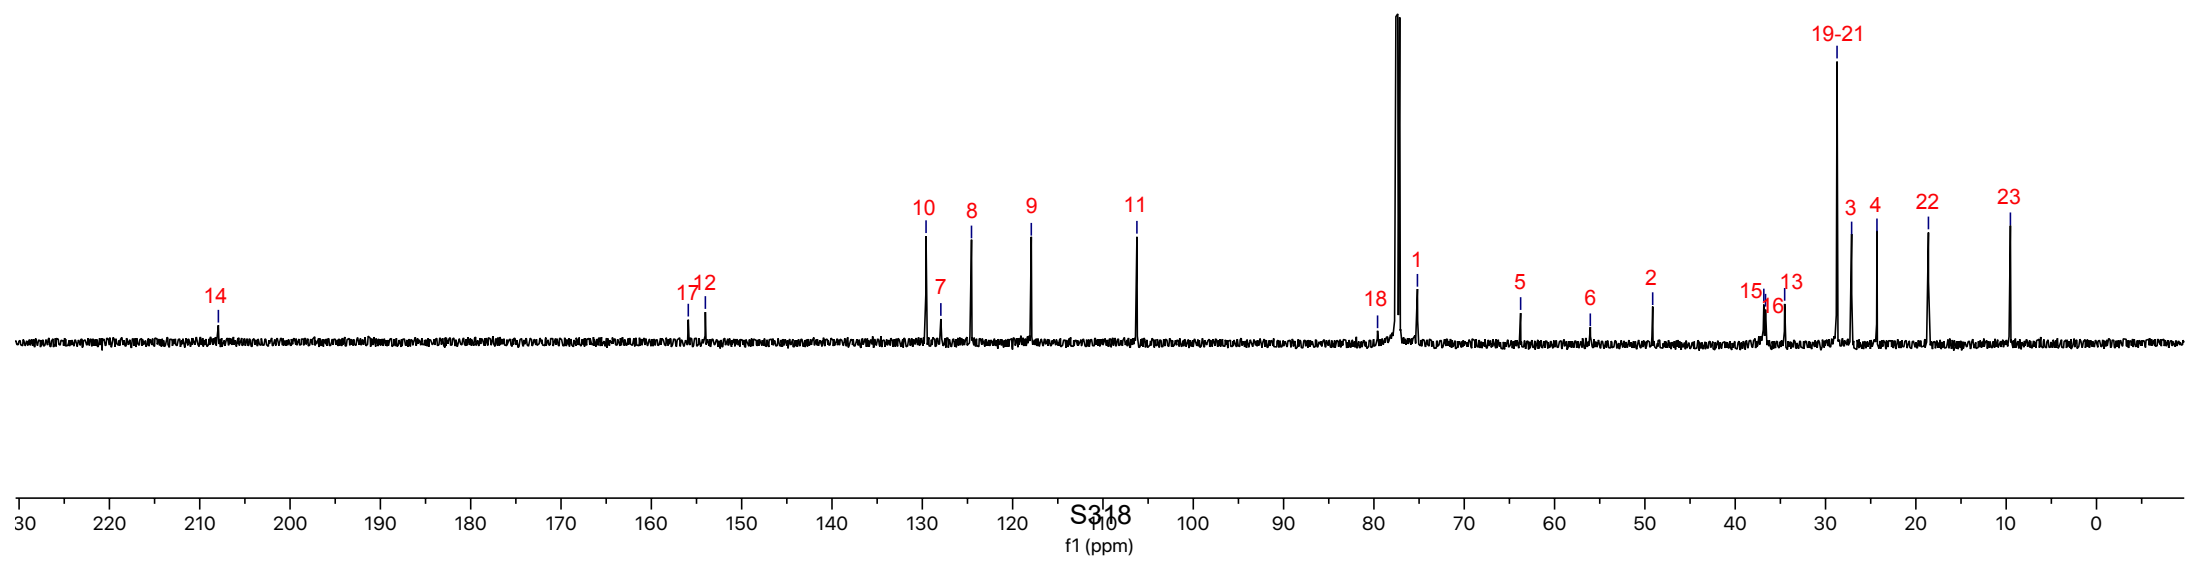

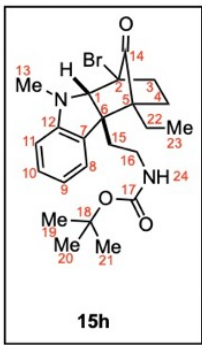

**COSY**

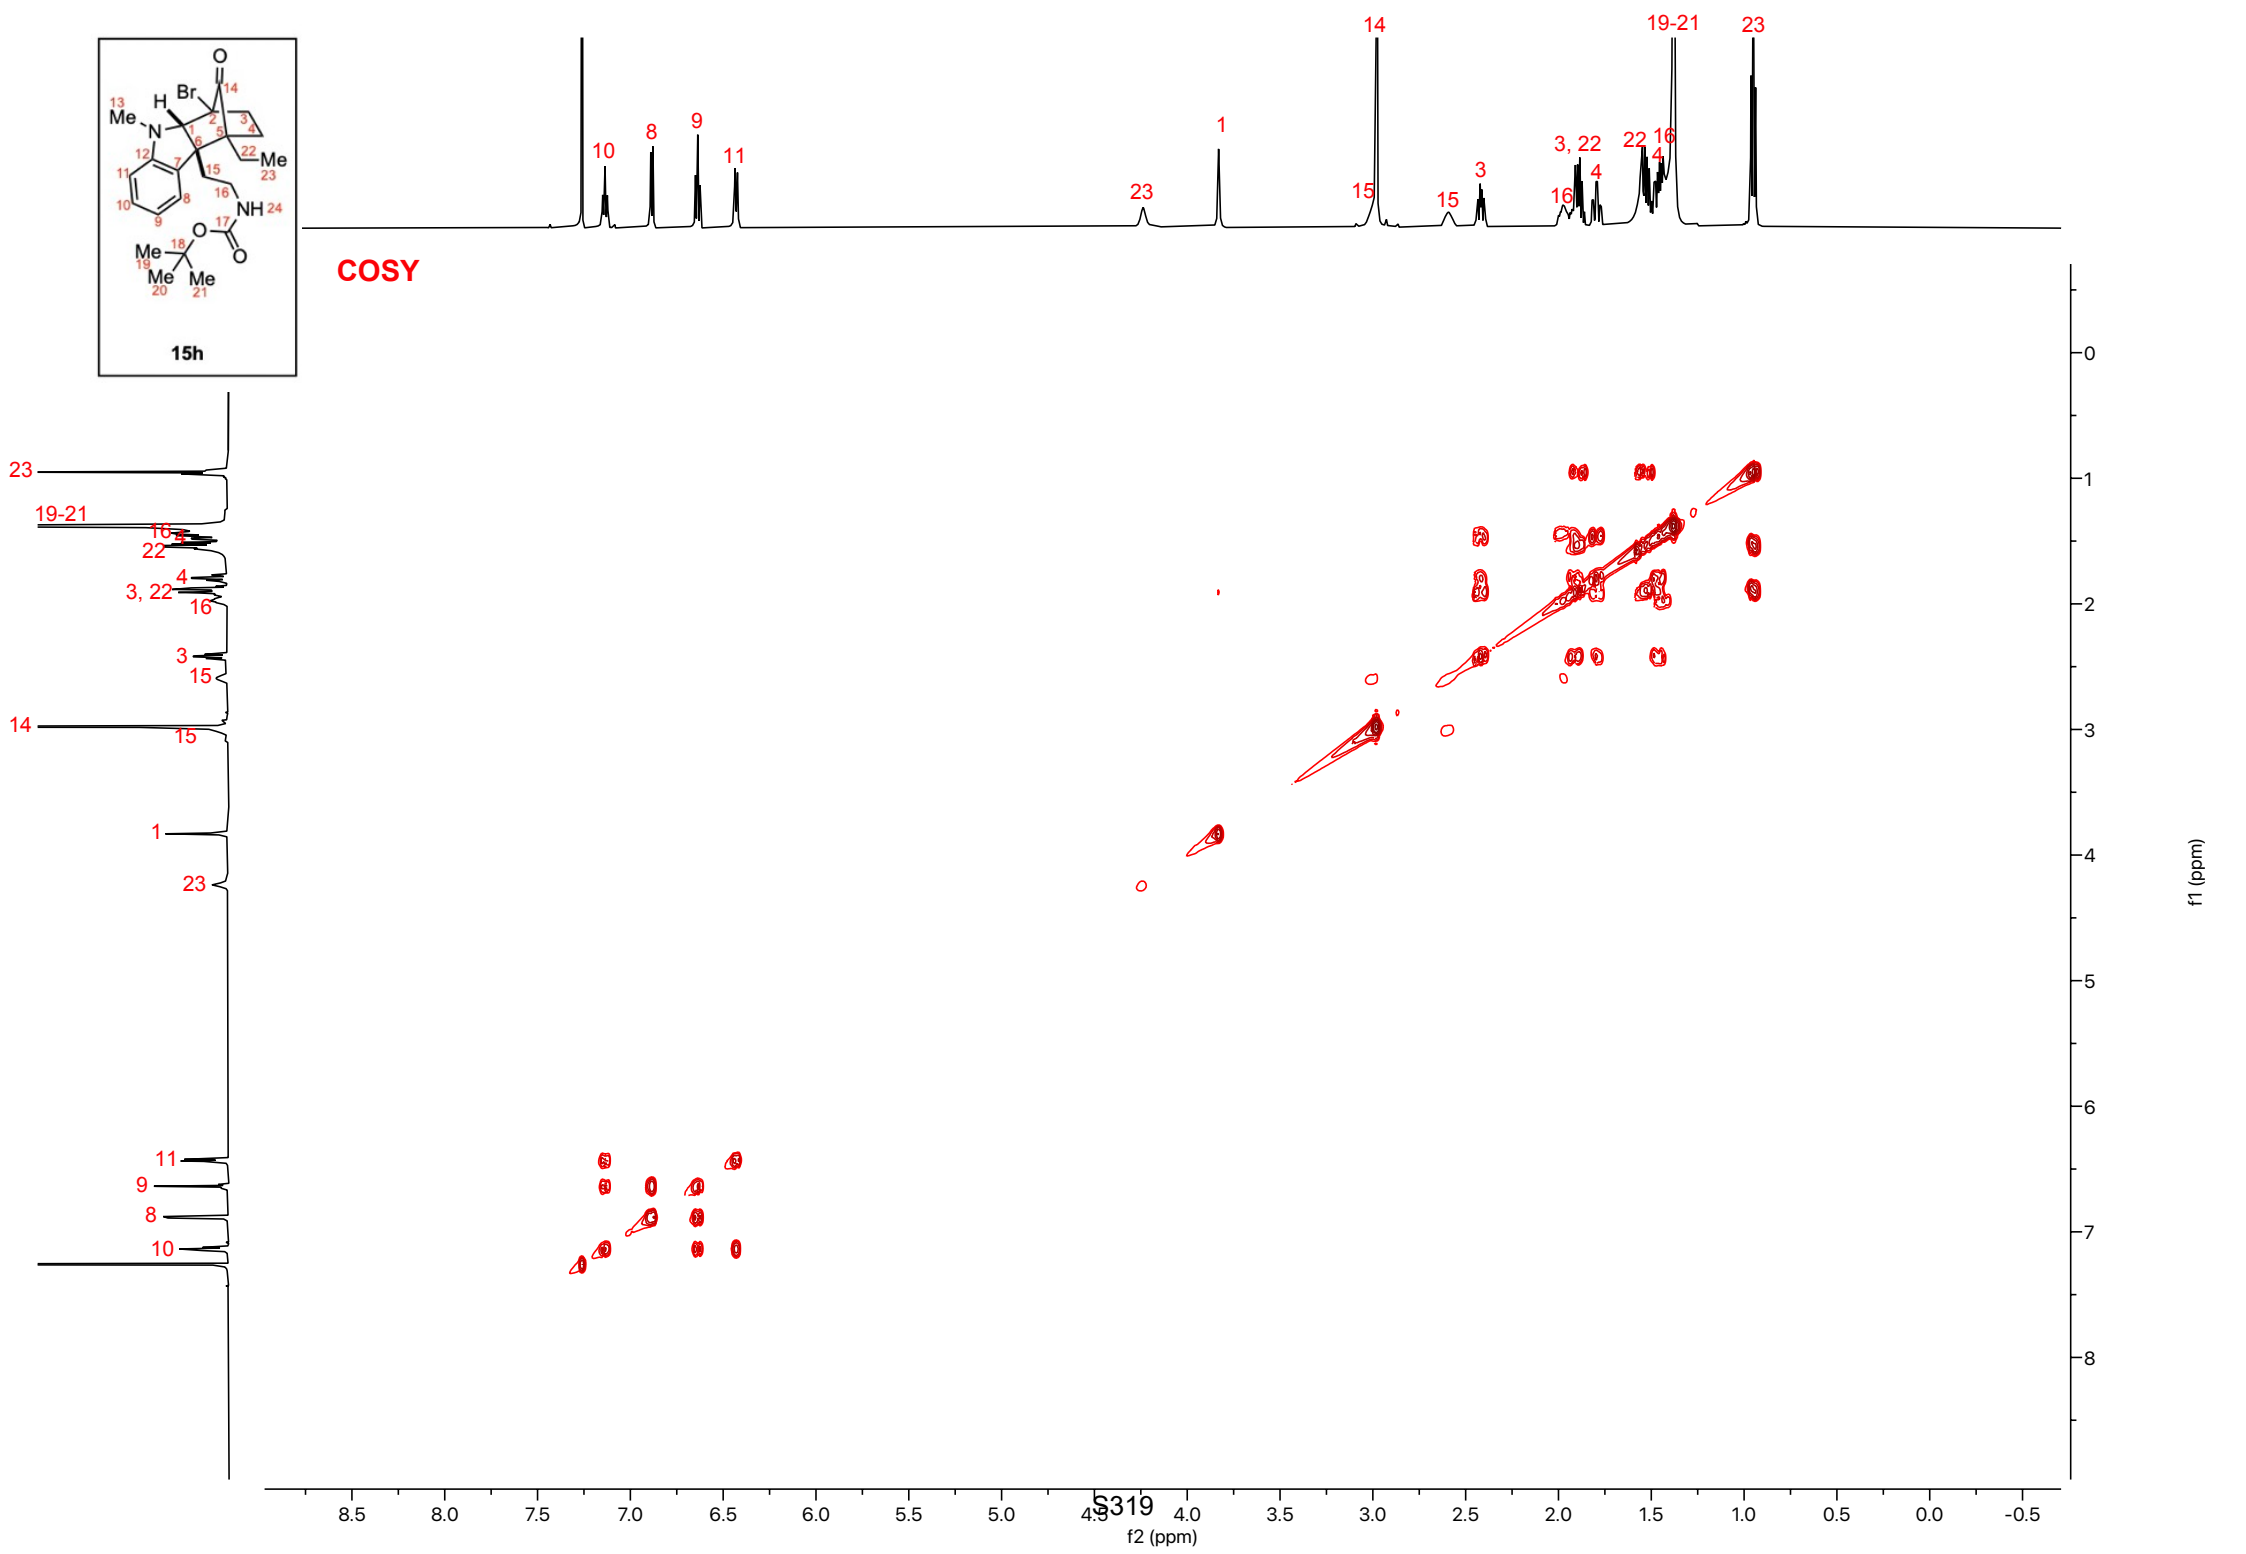





HSQC

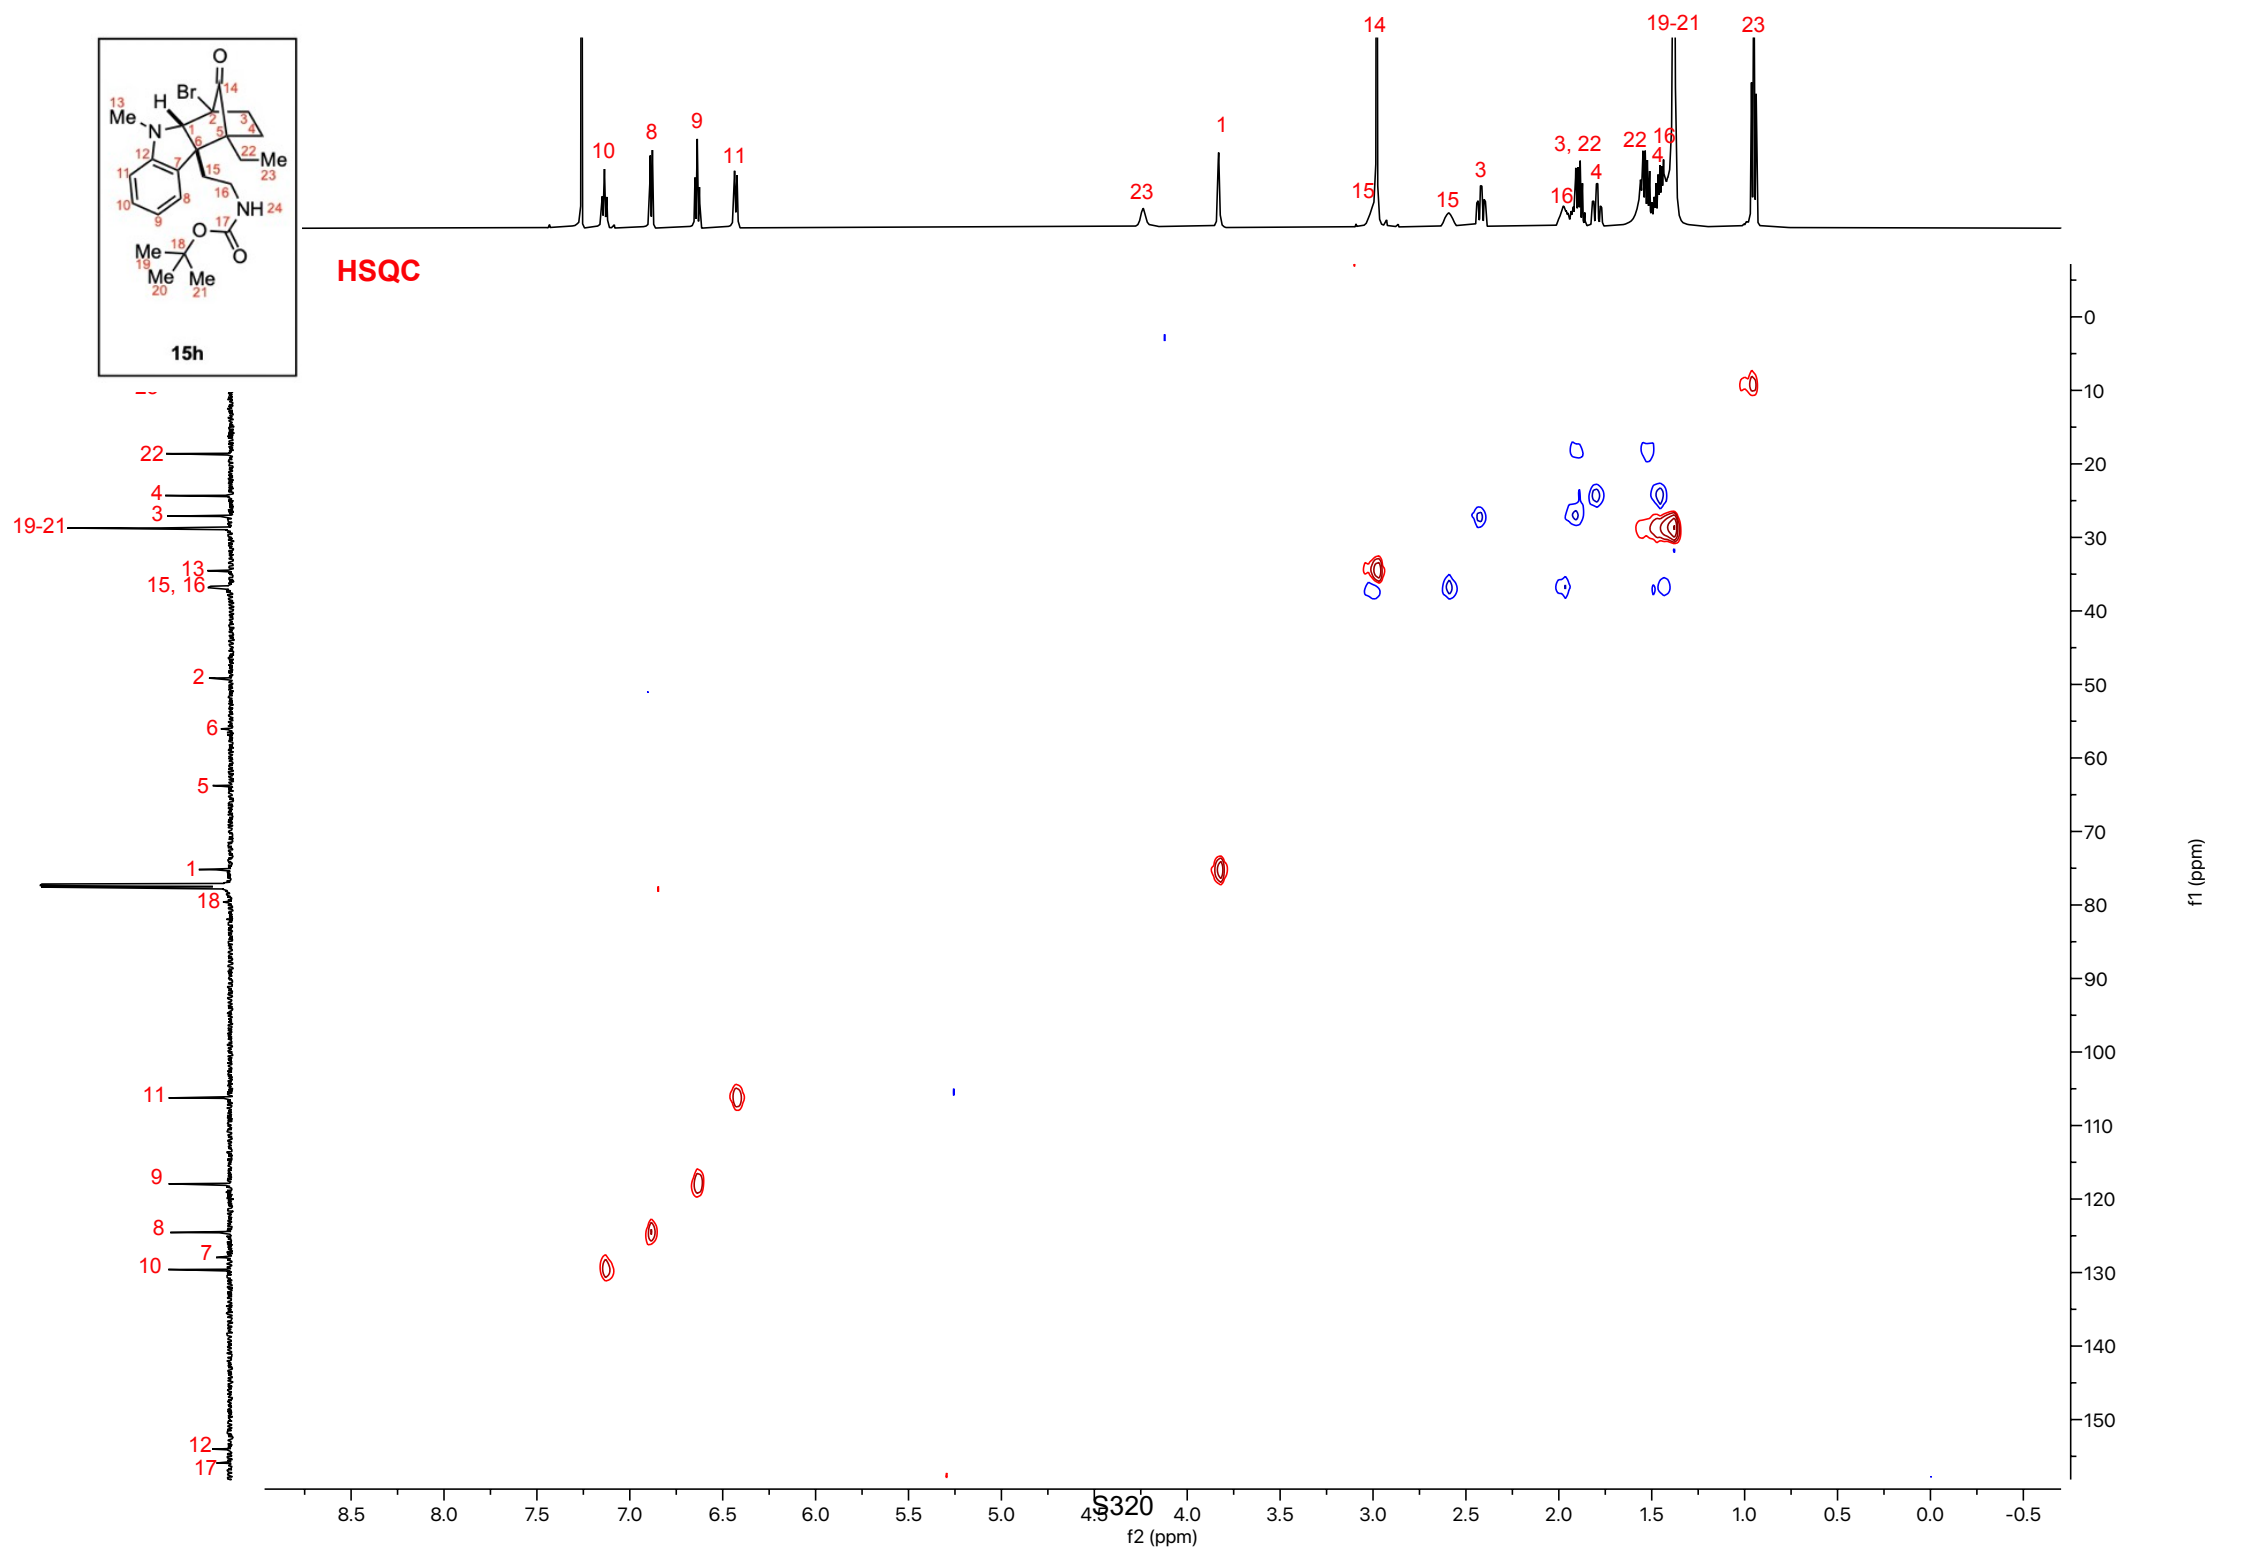



**HMBC**

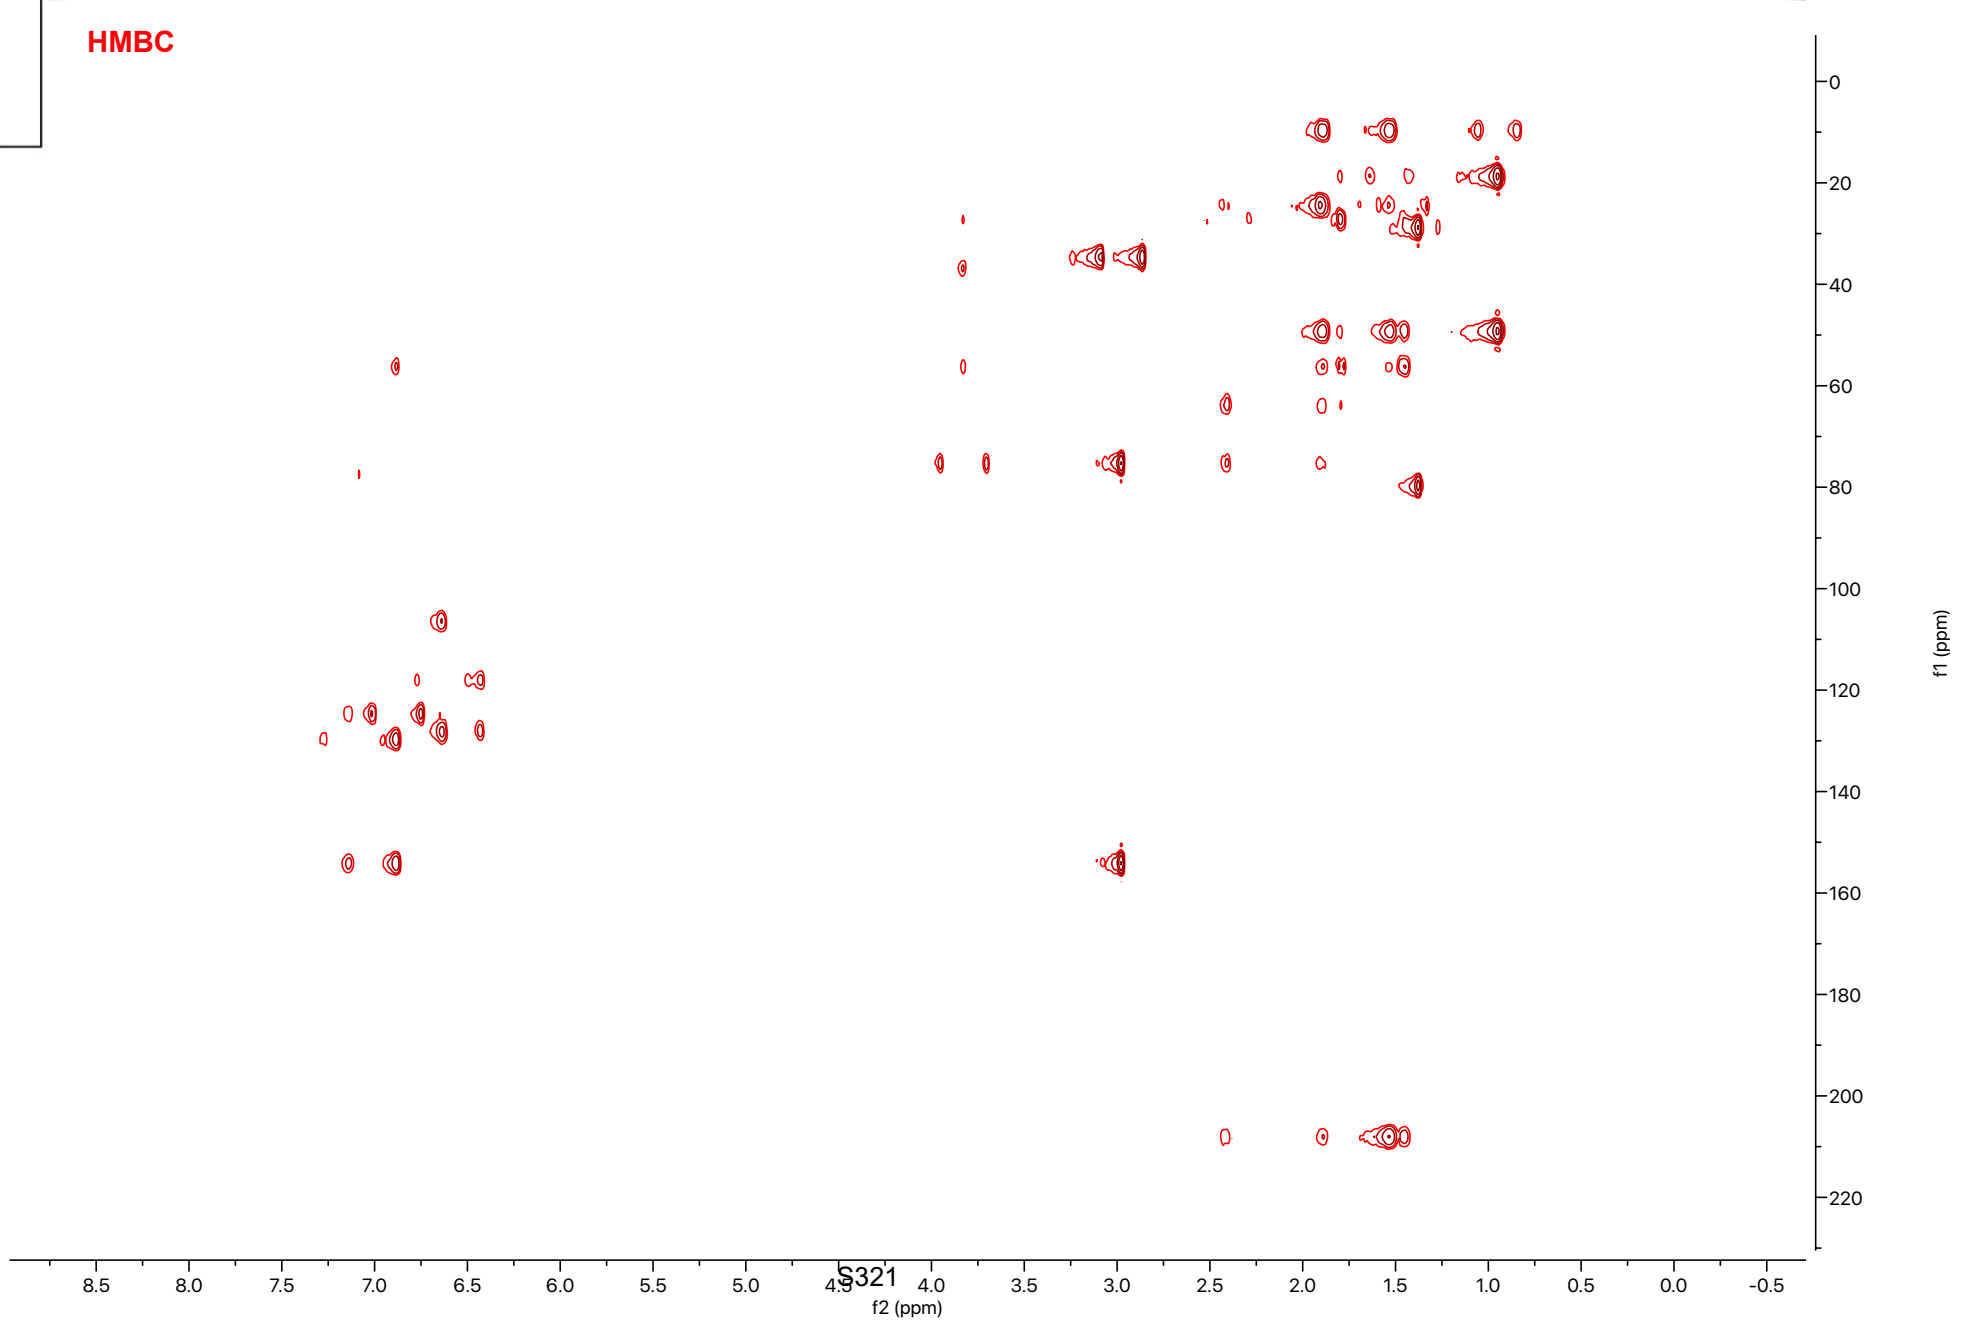

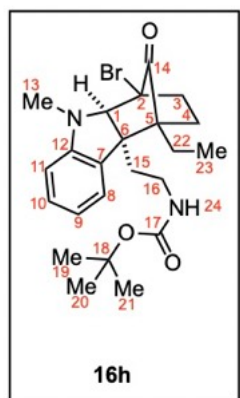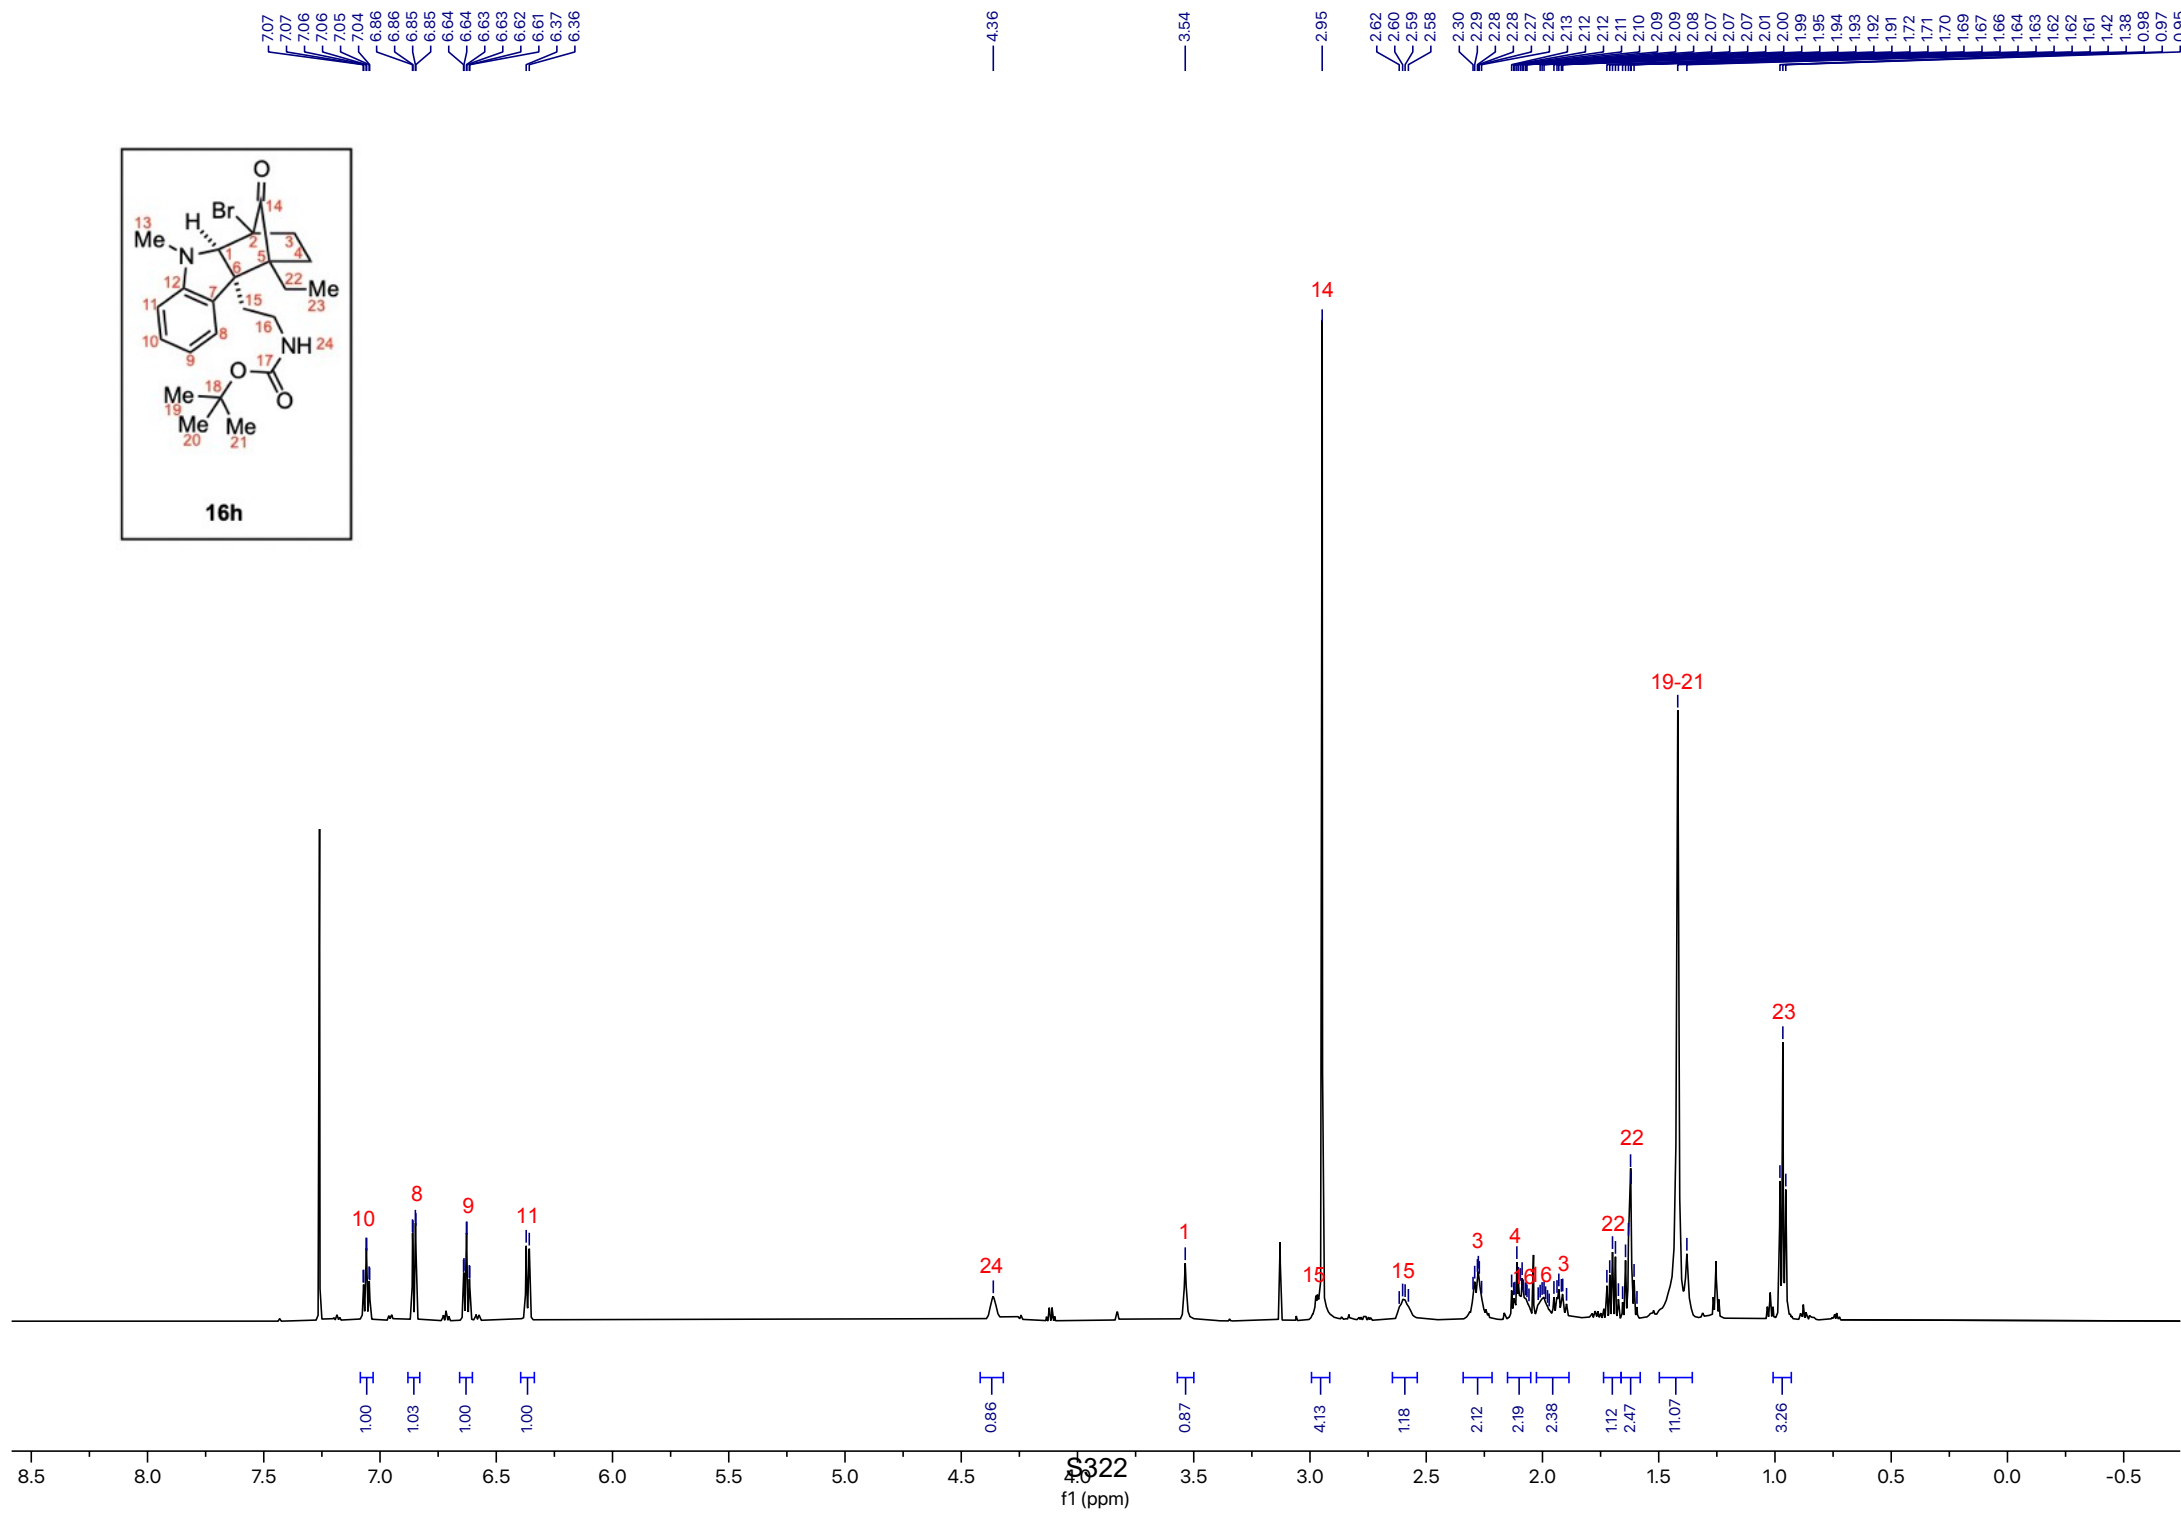



— 207.33

— 156.07  
— 153.24

— 129.55  
— 127.59  
— 125.97

— 118.18

— 108.44

— 79.73  
— 78.02

— 65.98

— 56.07

— 48.42

— 38.54  
— 37.26  
— 35.47

— 31.01  
— 28.76

— 23.03  
— 19.57

— 9.99

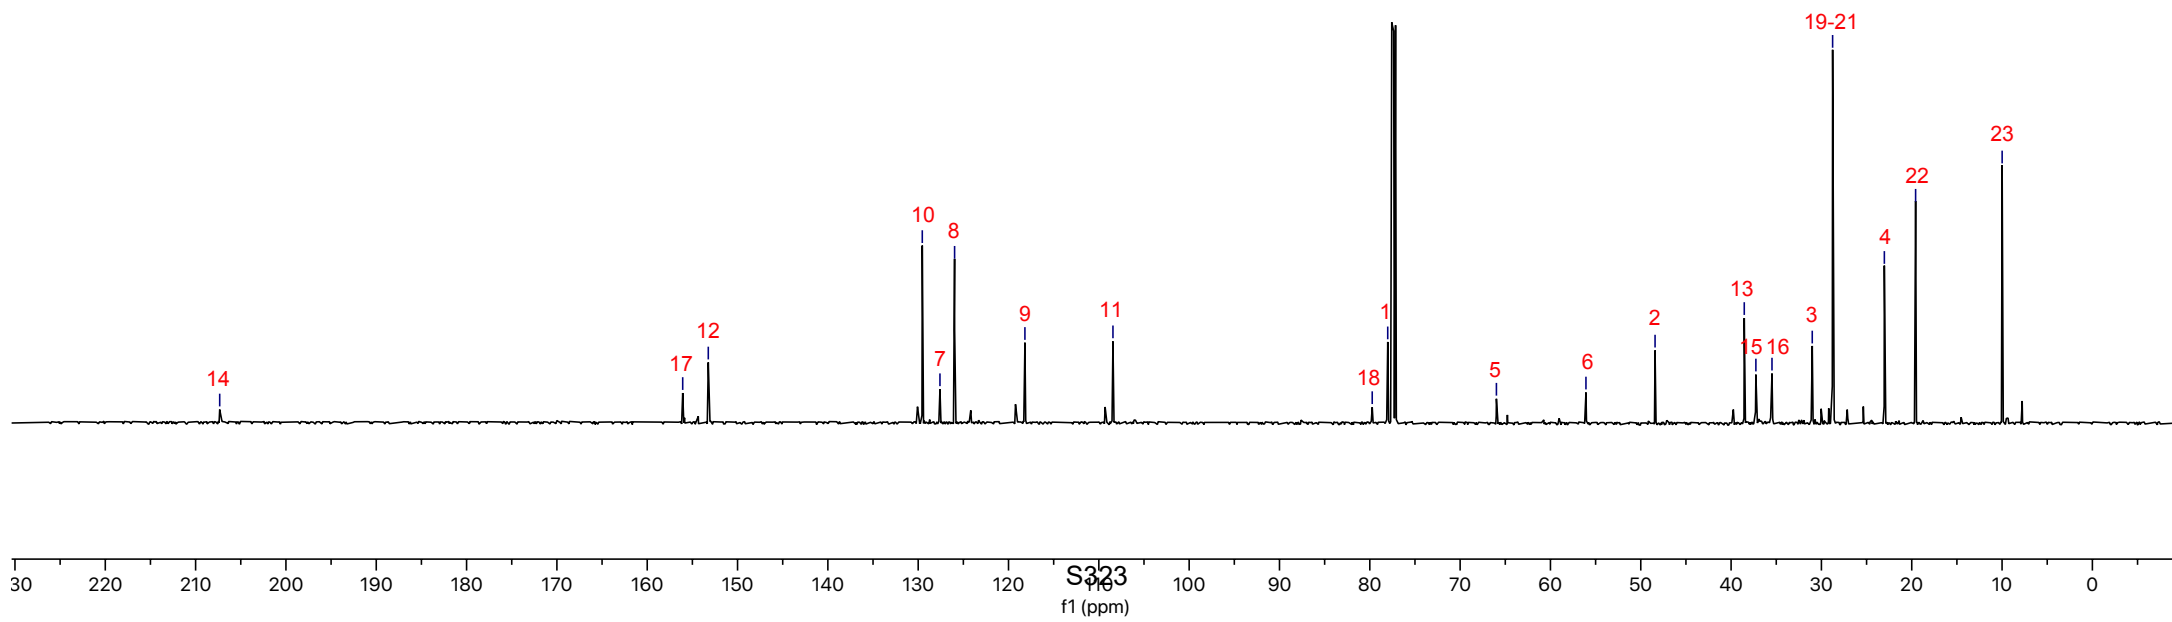

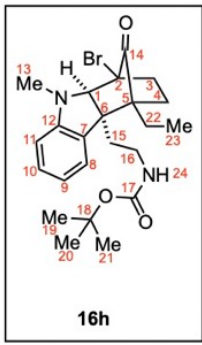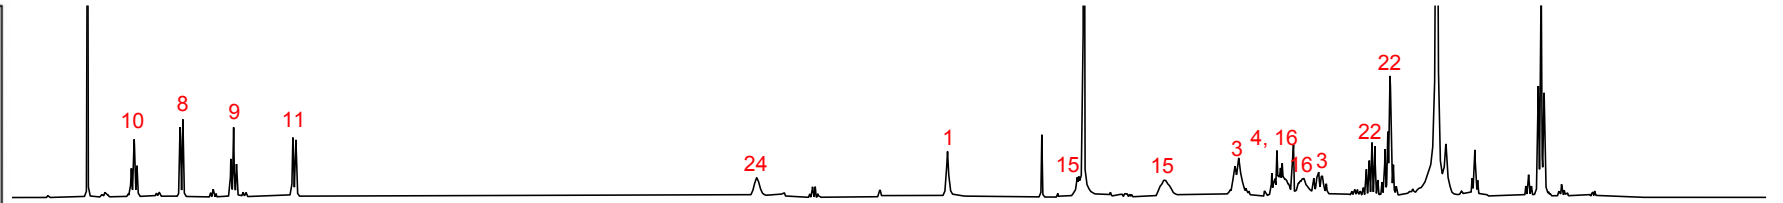

**COSY**

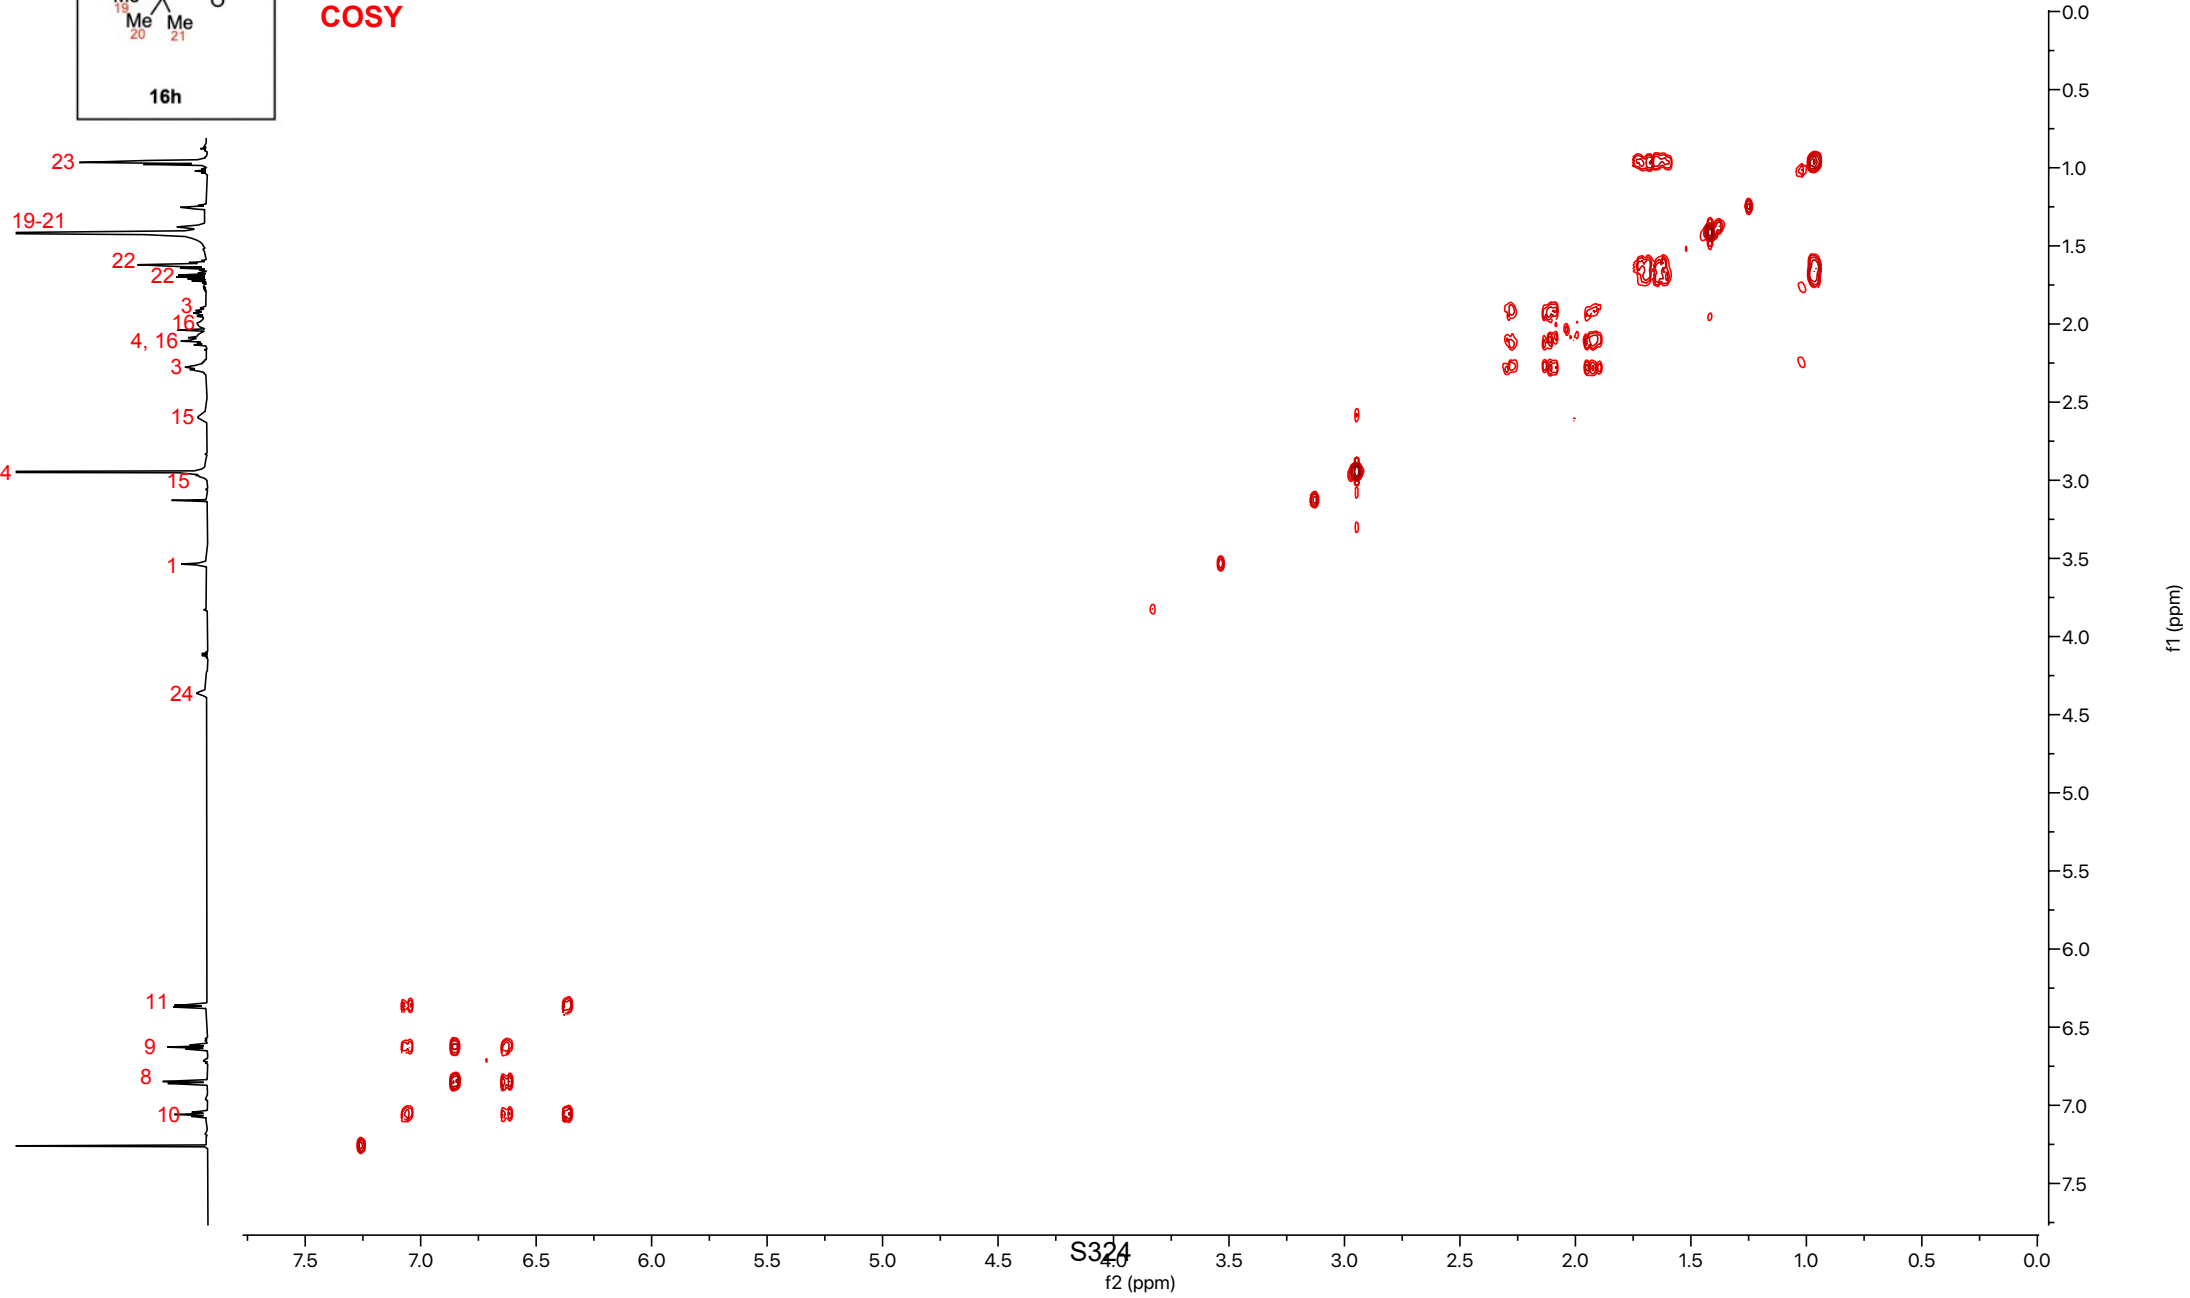

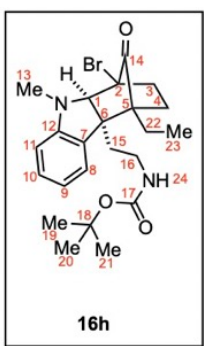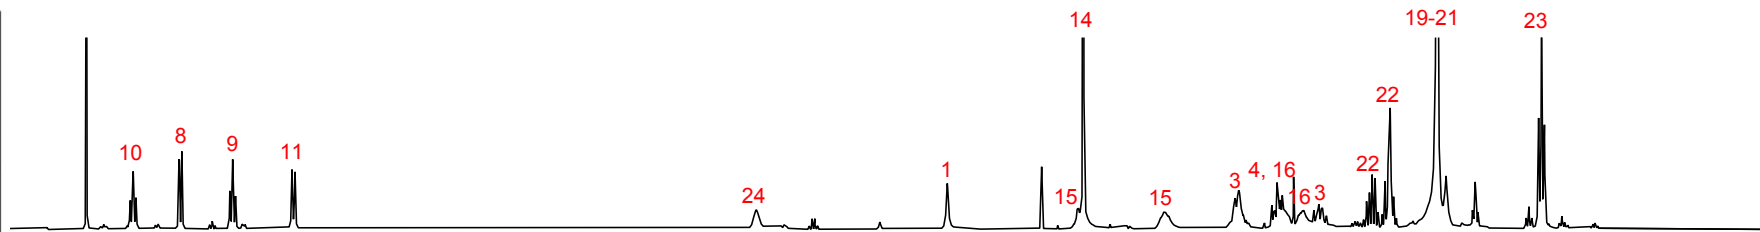

**HSQC**

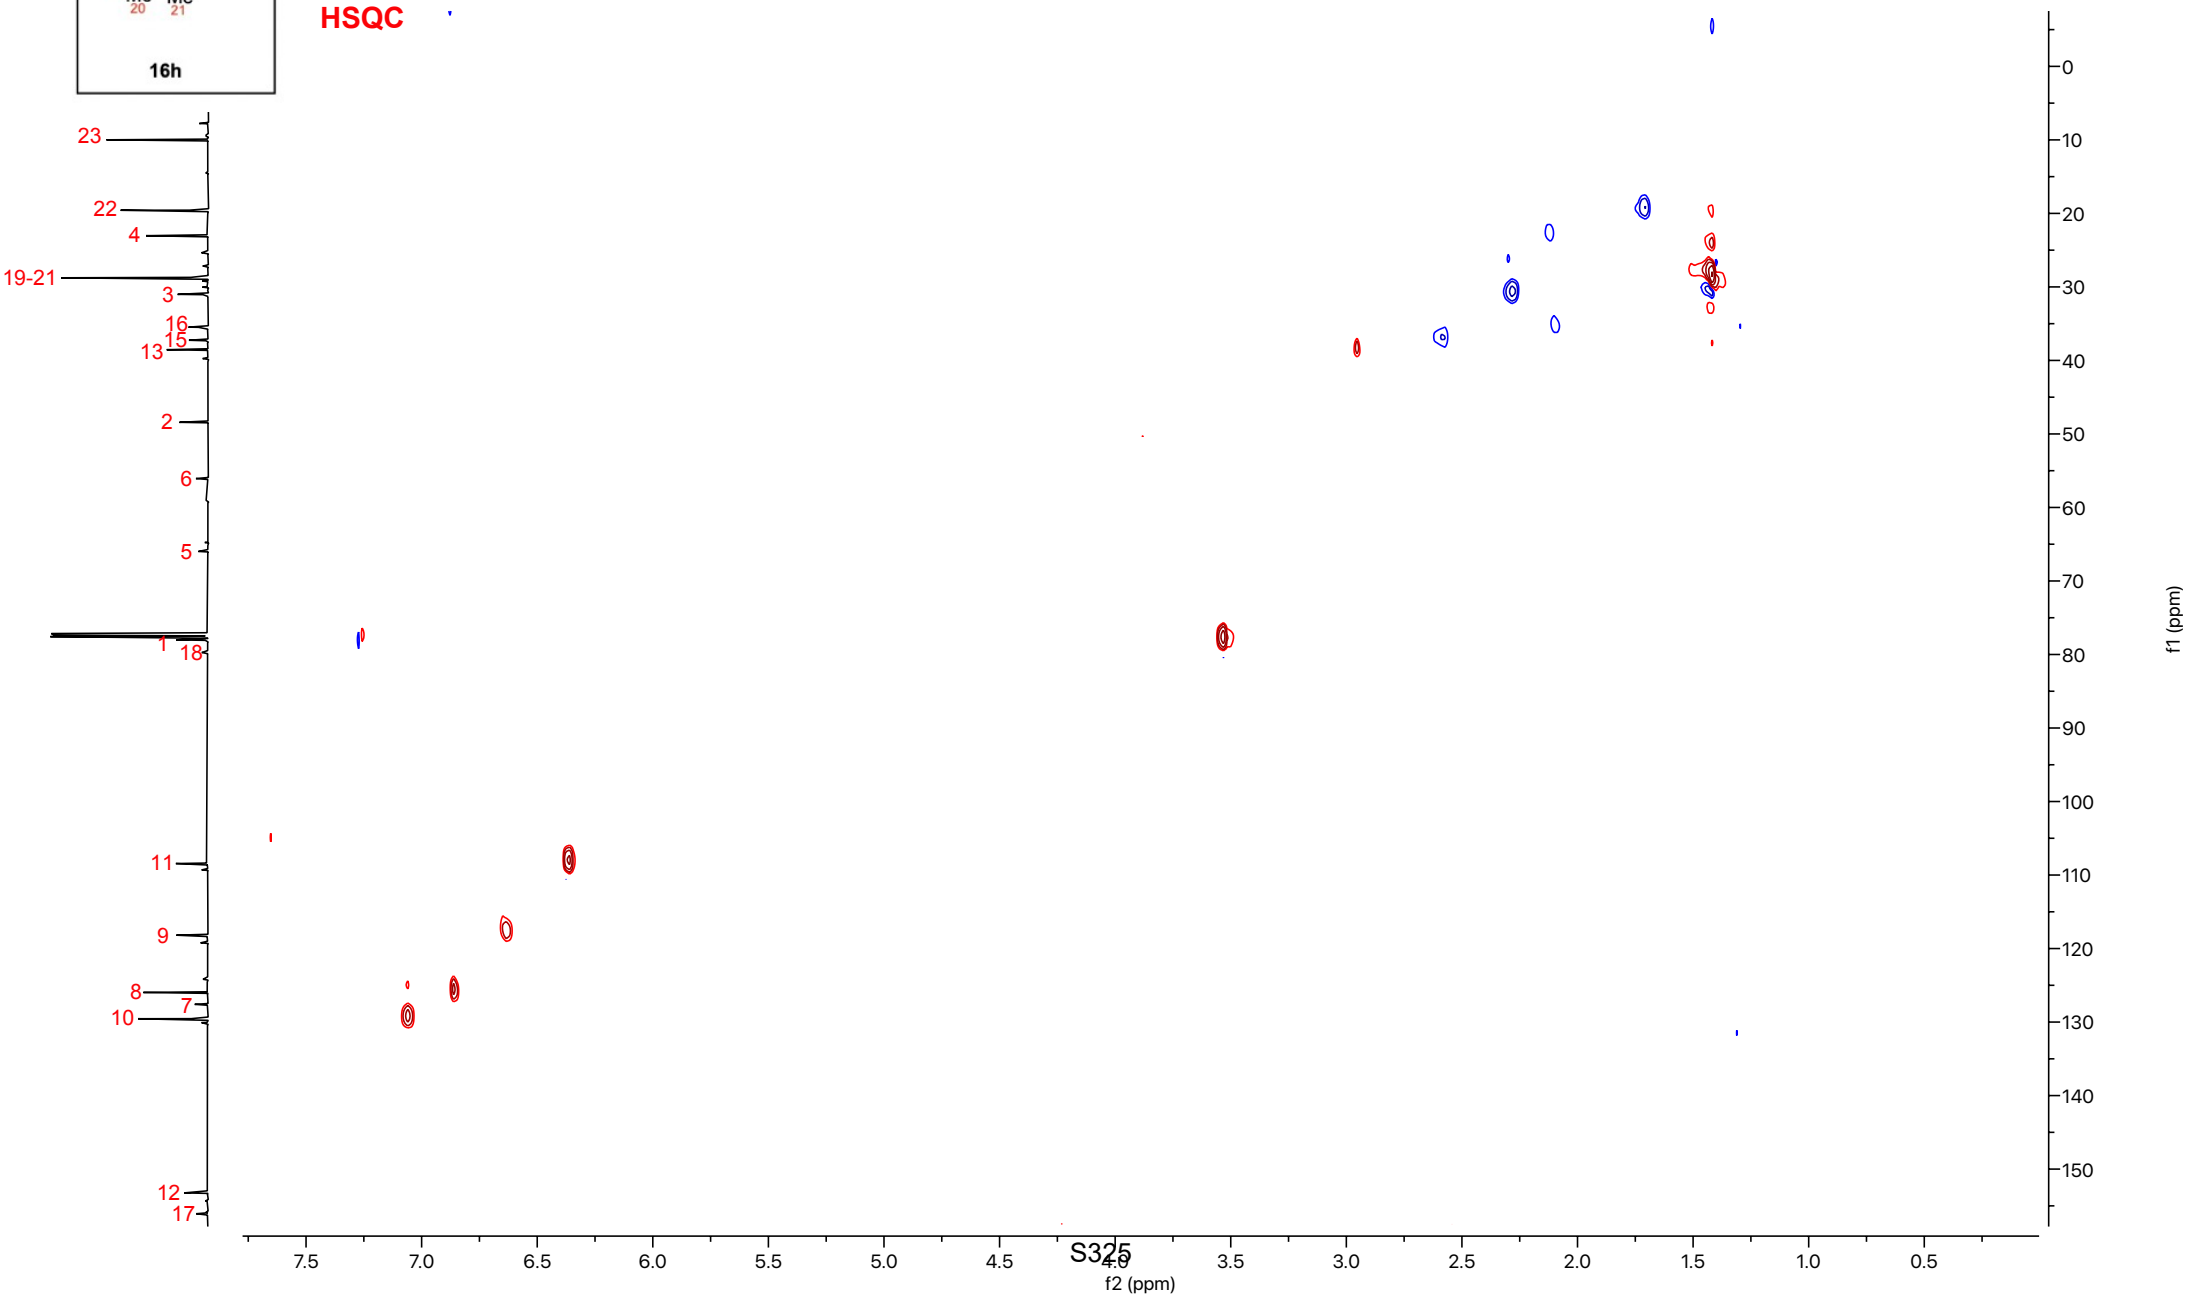

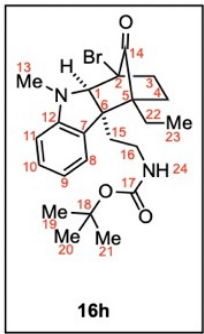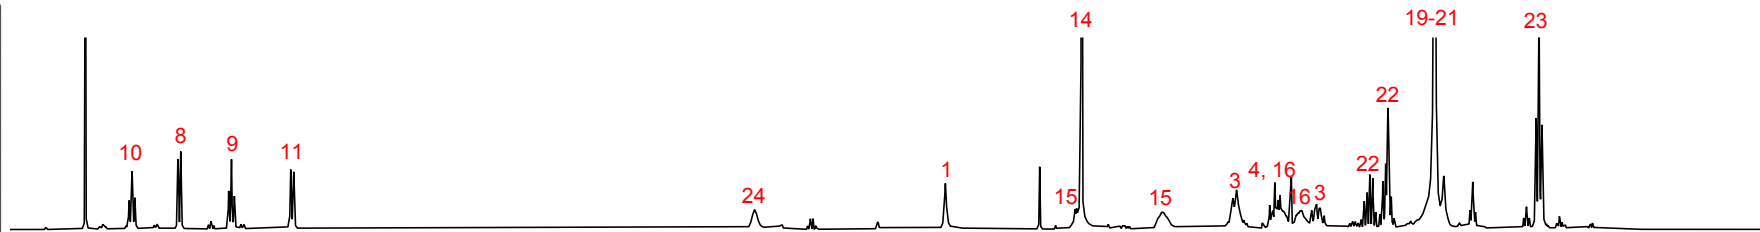

**HMBC**

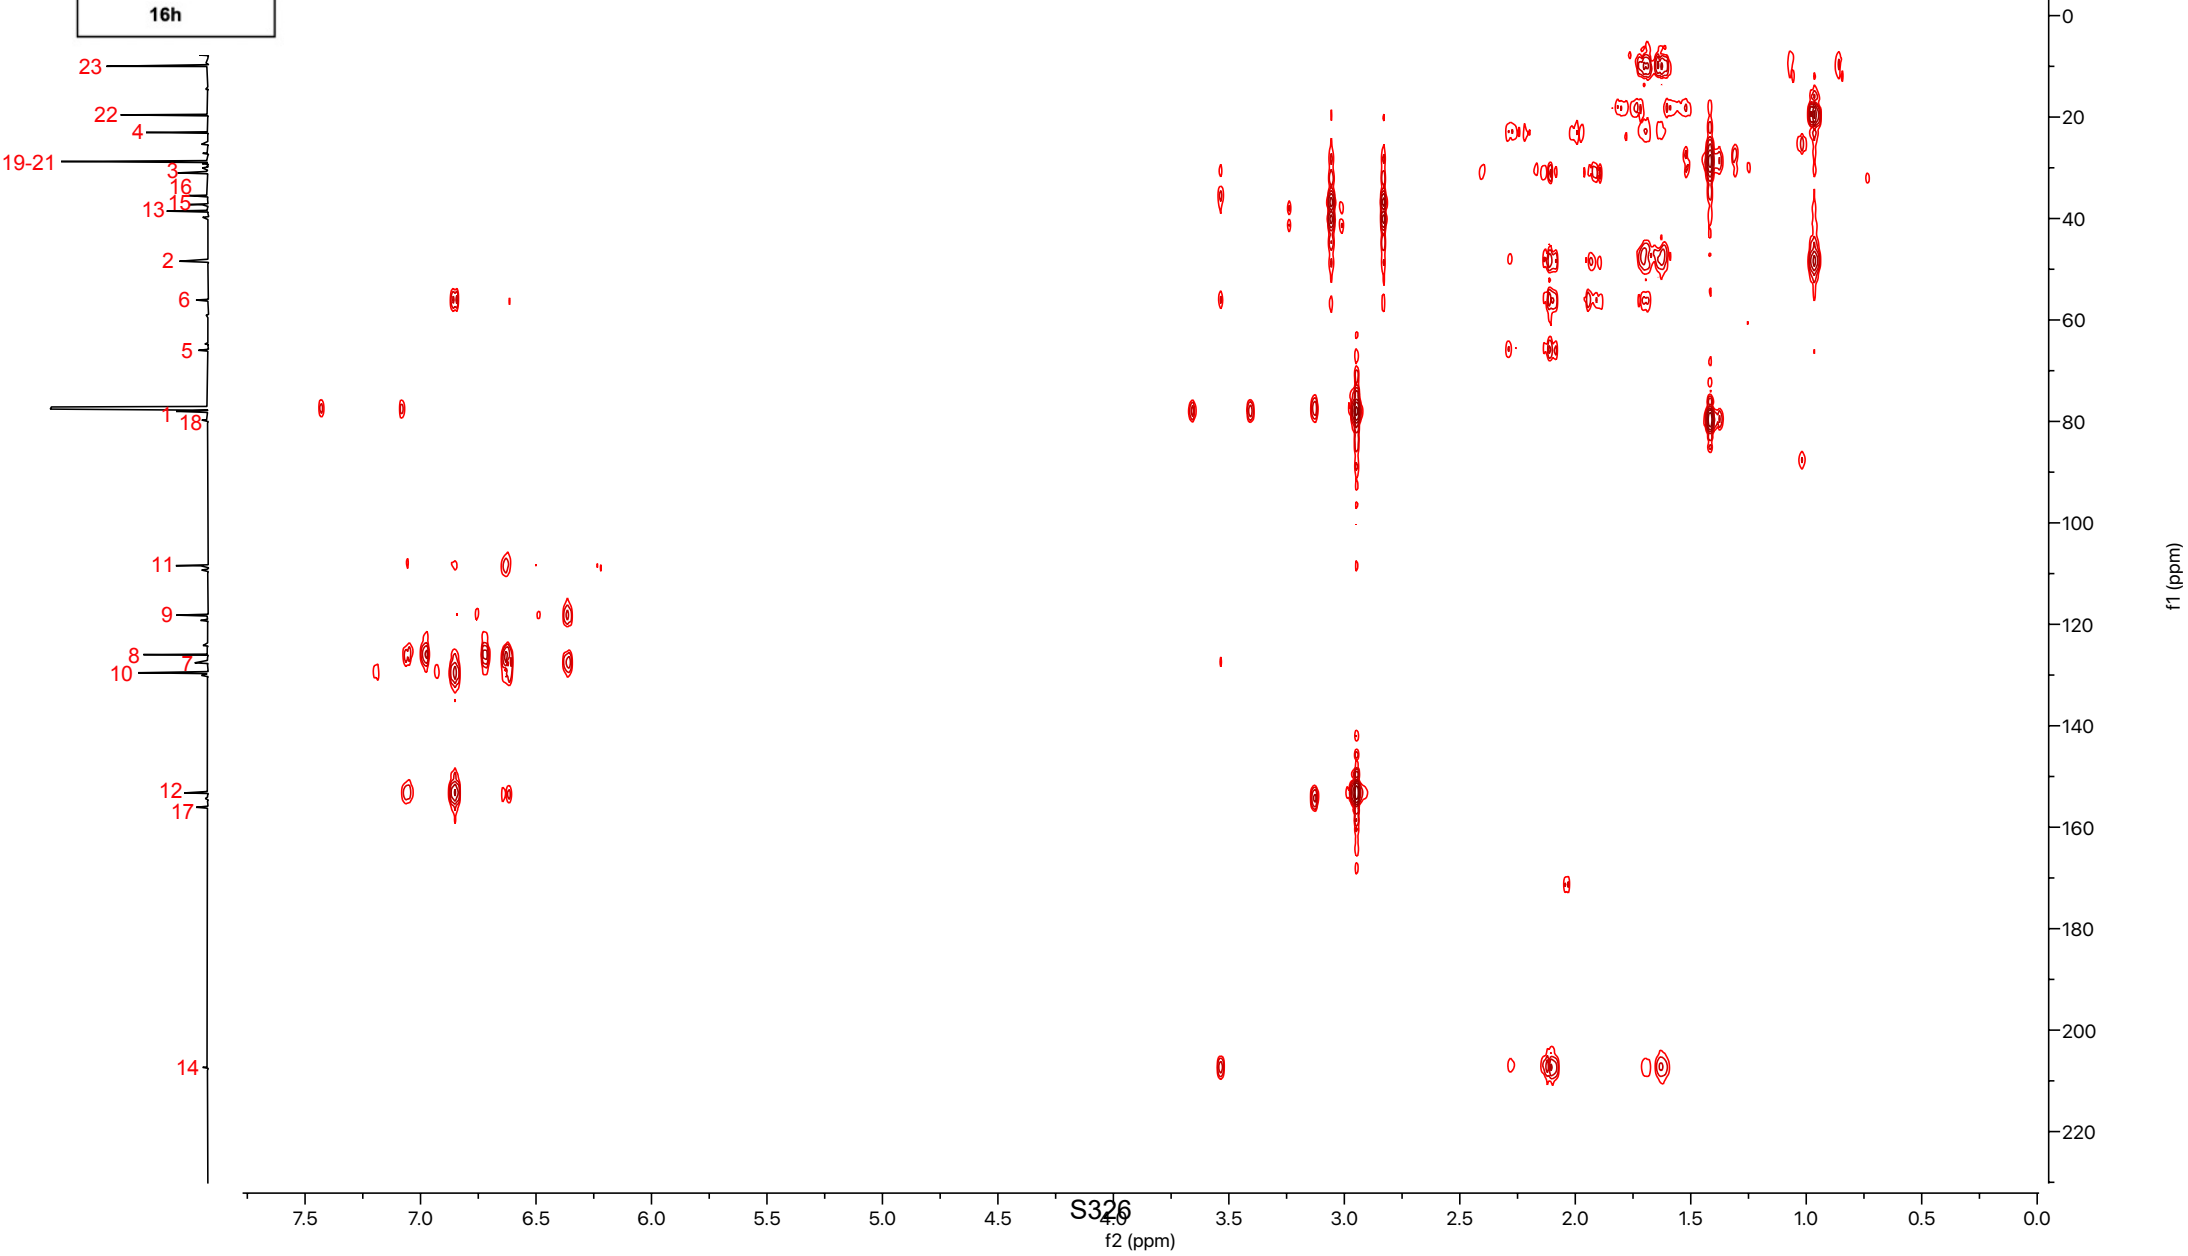

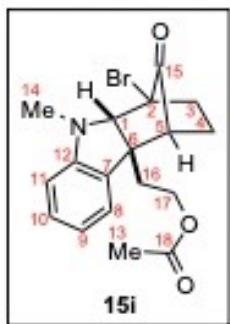

7.15  
7.14  
7.13  
7.12  
7.12  
6.84  
6.84  
6.82  
6.82  
6.67  
6.67  
6.66  
6.66  
6.65  
6.64  
6.46  
6.45

3.96  
3.96  
3.94  
3.93  
3.93  
3.92  
3.92  
3.91  
3.91  
3.90  
3.90  
3.89  
3.88  
3.87

2.99  
2.39  
2.38  
2.37  
2.37  
2.37  
2.36  
2.35  
2.35  
2.14  
2.13  
2.13  
2.12  
2.11  
2.10  
1.91  
1.91  
1.90  
1.89  
1.89  
1.89  
1.88  
1.88  
1.88  
1.87  
1.87  
1.87  
1.86  
1.86  
1.85  
1.85  
1.82  
1.82  
1.80  
1.79  
1.77  
1.77  
1.53  
1.52  
1.51  
1.51  
1.49  
1.49

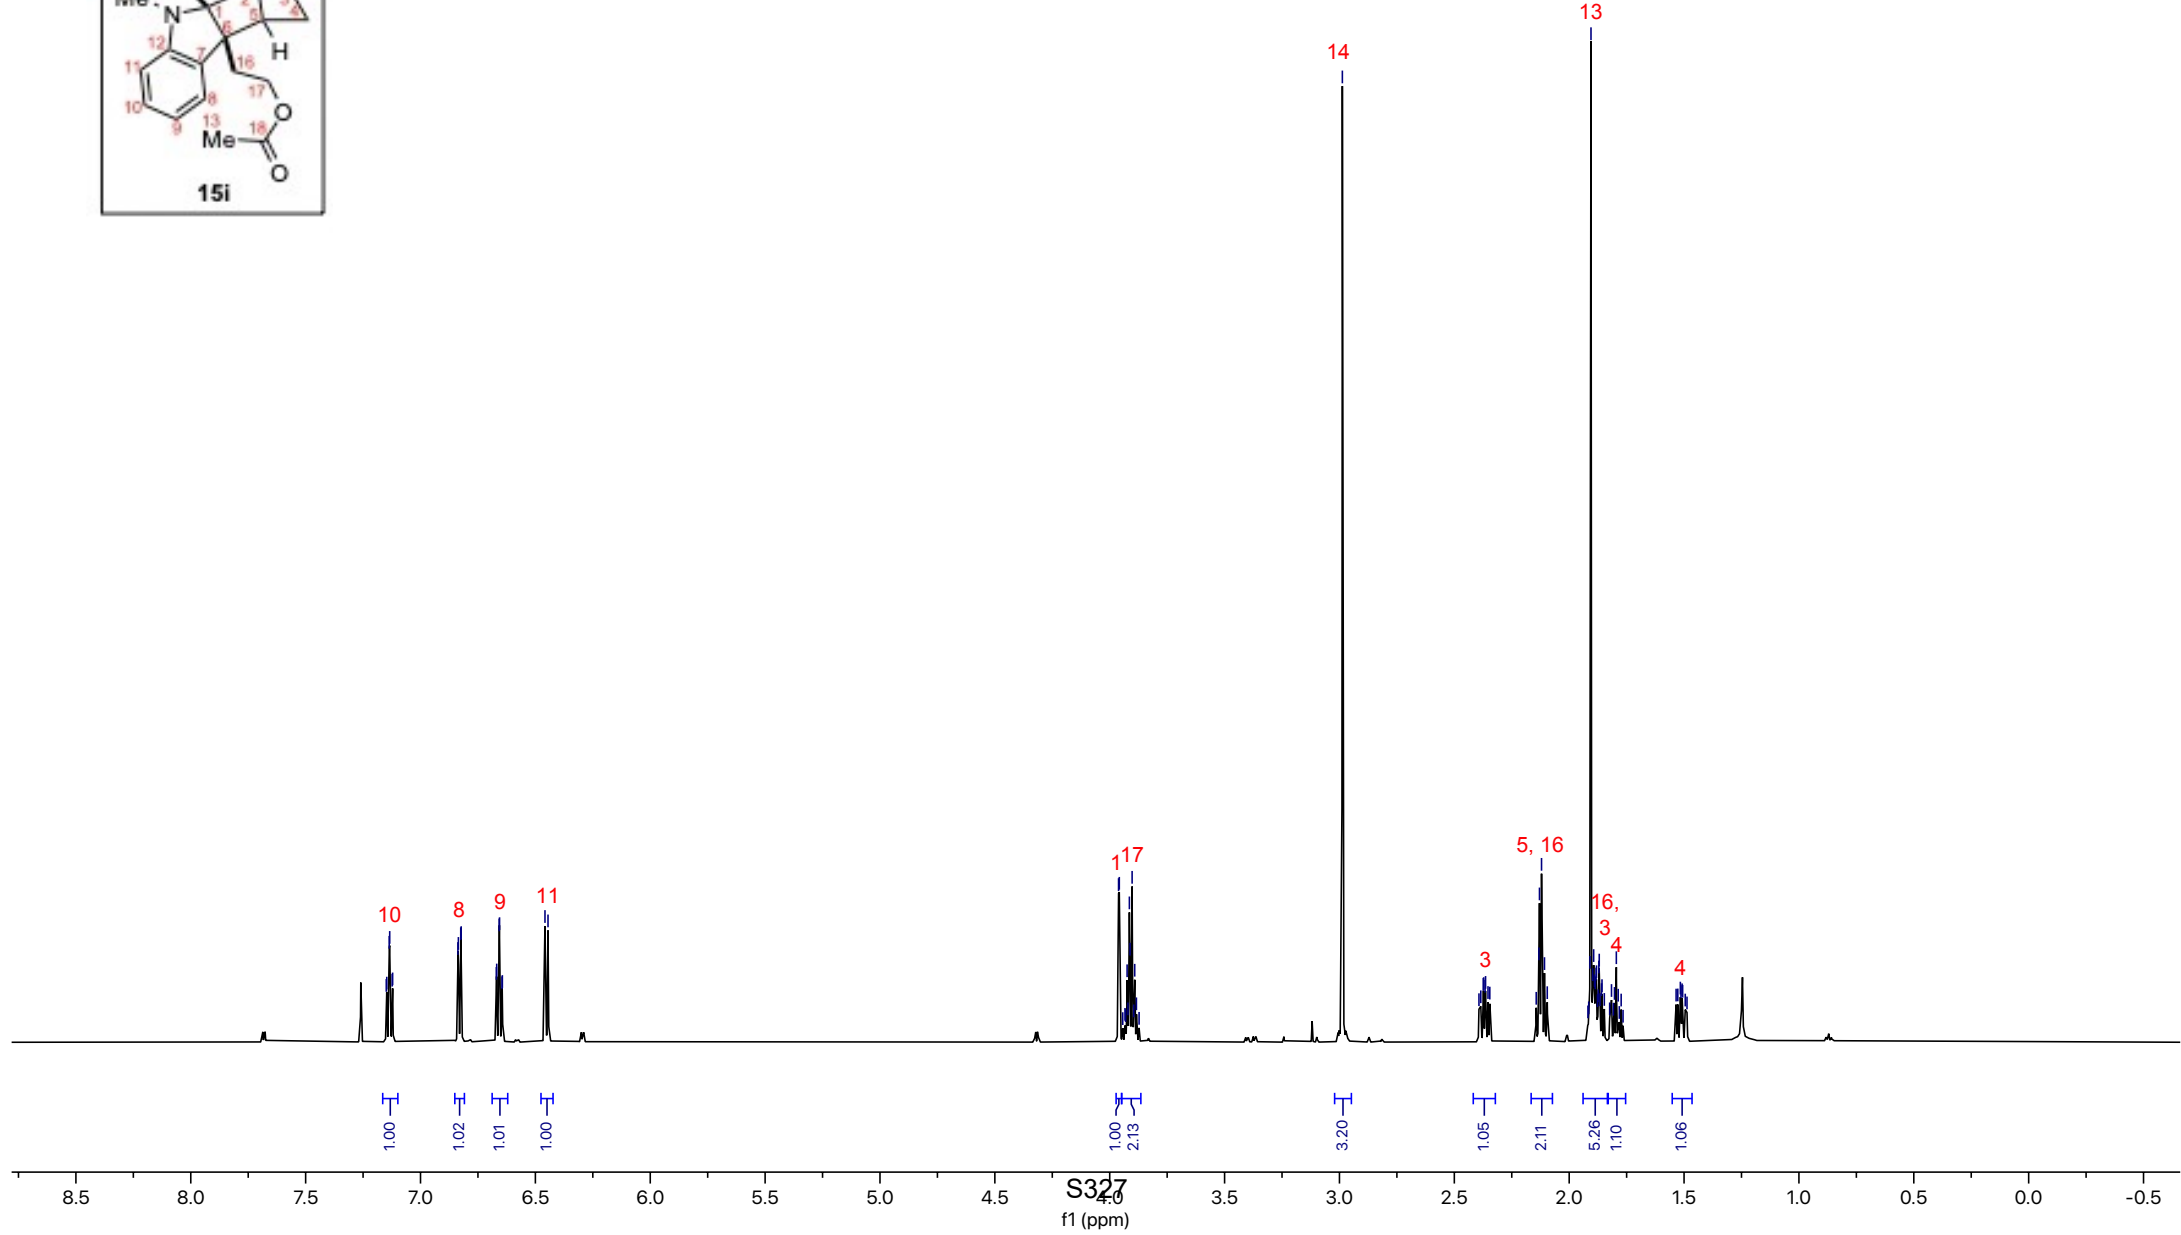





— 206.32

— 170.96

— 154.05

— 129.71  
— 127.59  
— 124.58

— 118.04

— 106.59

— 75.84

— 63.37  
— 60.75

— 53.32

— 45.44

— 38.27  
— 34.80

— 26.46  
— 21.55  
— 21.07

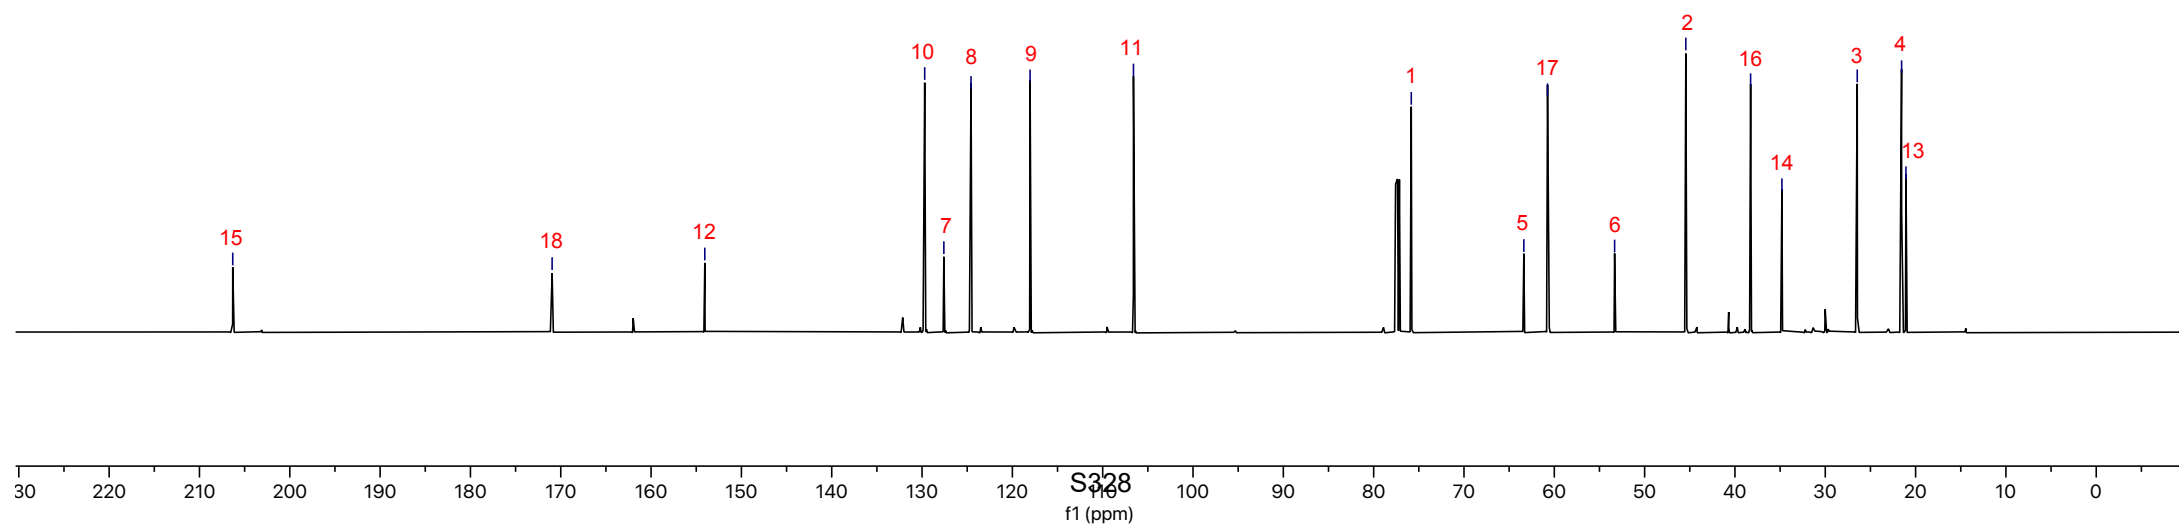

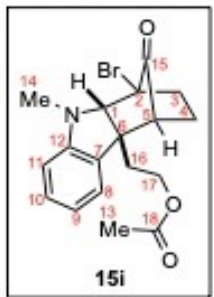

COSY

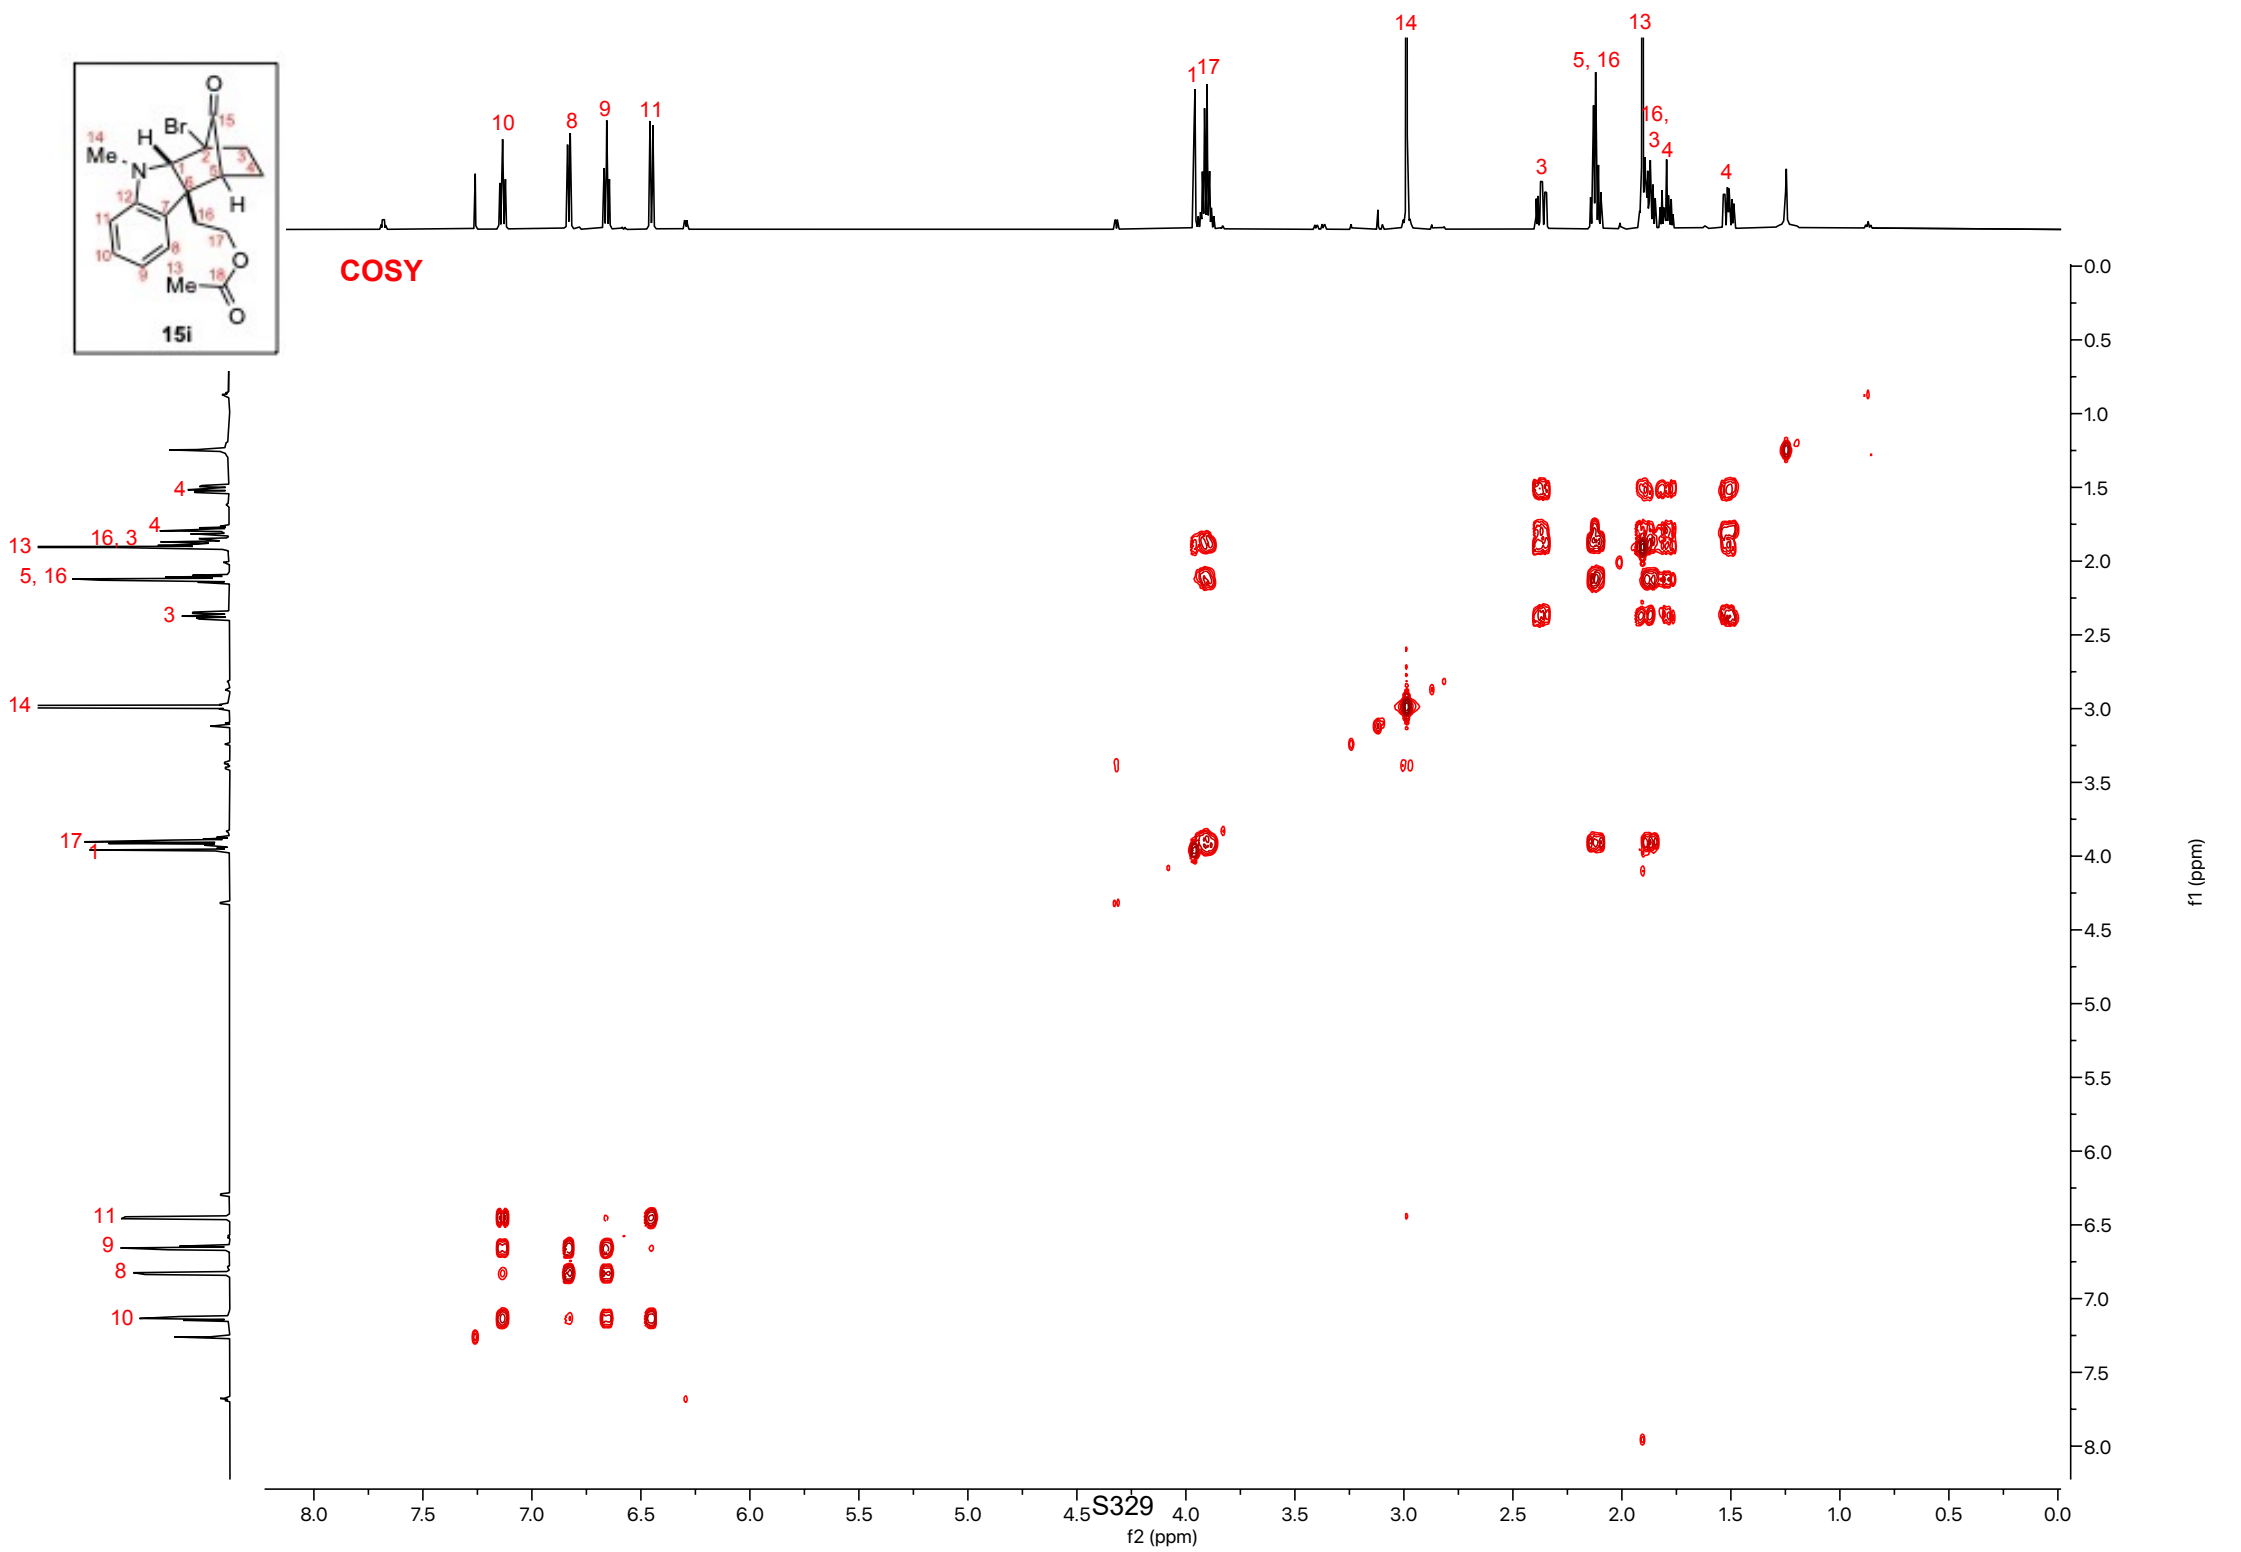

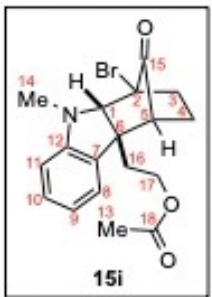

HSQC

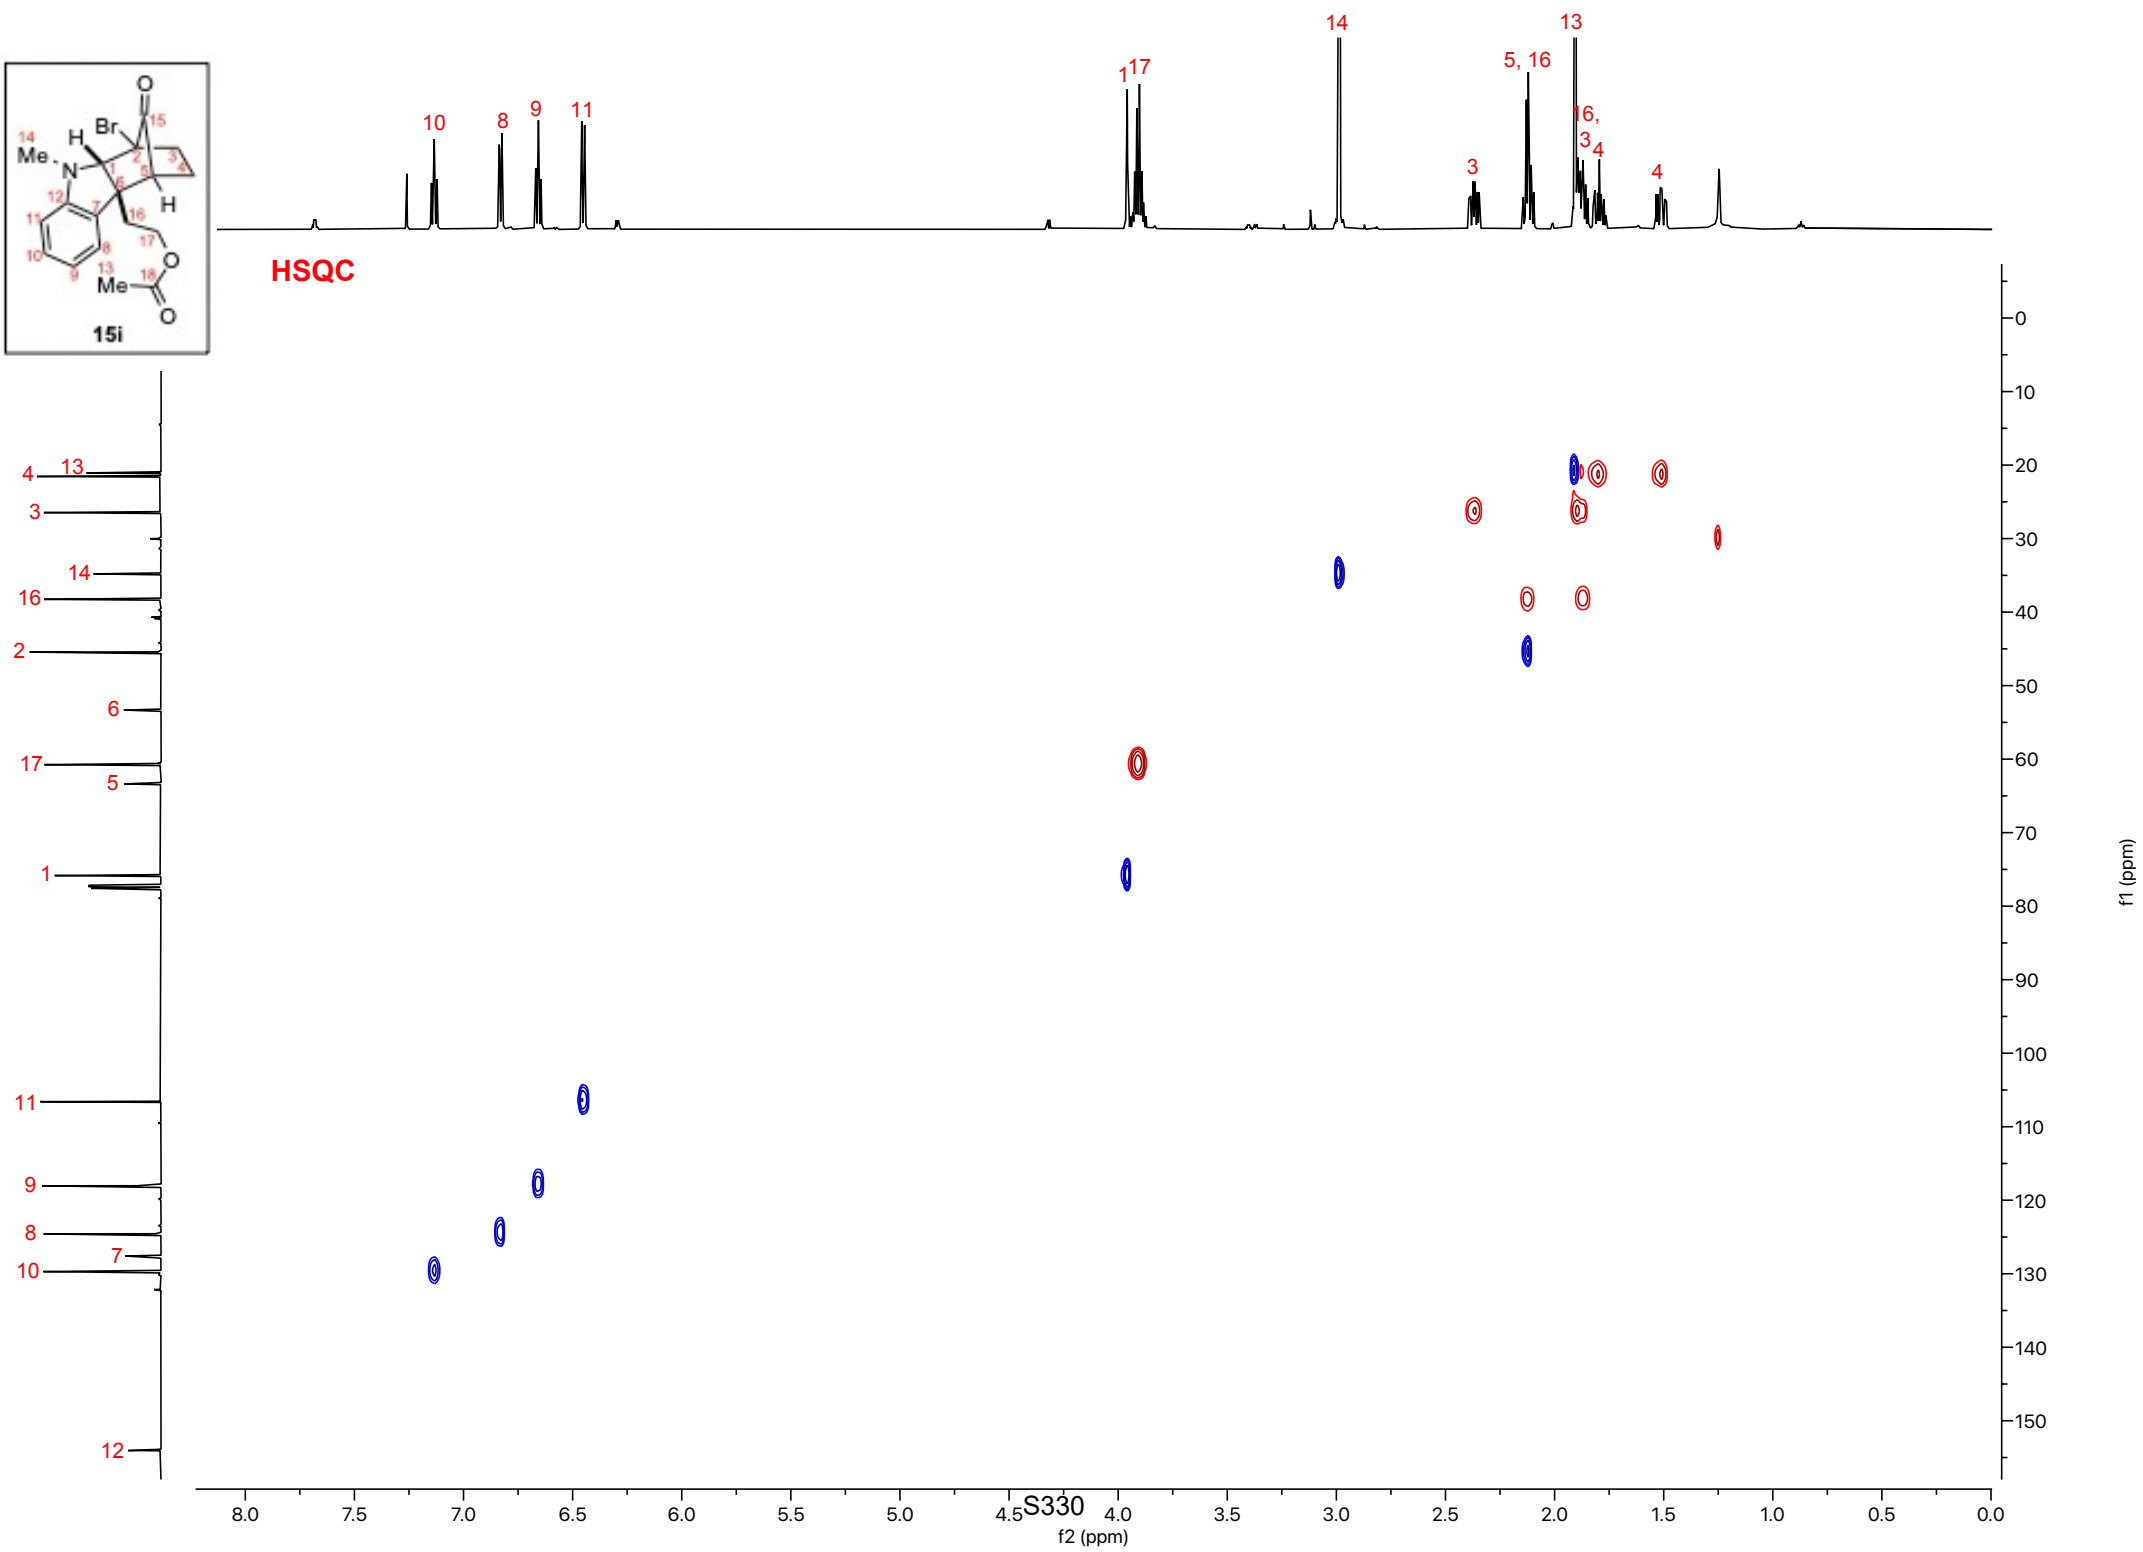

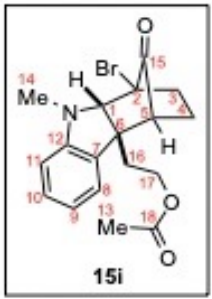

**HMBC**

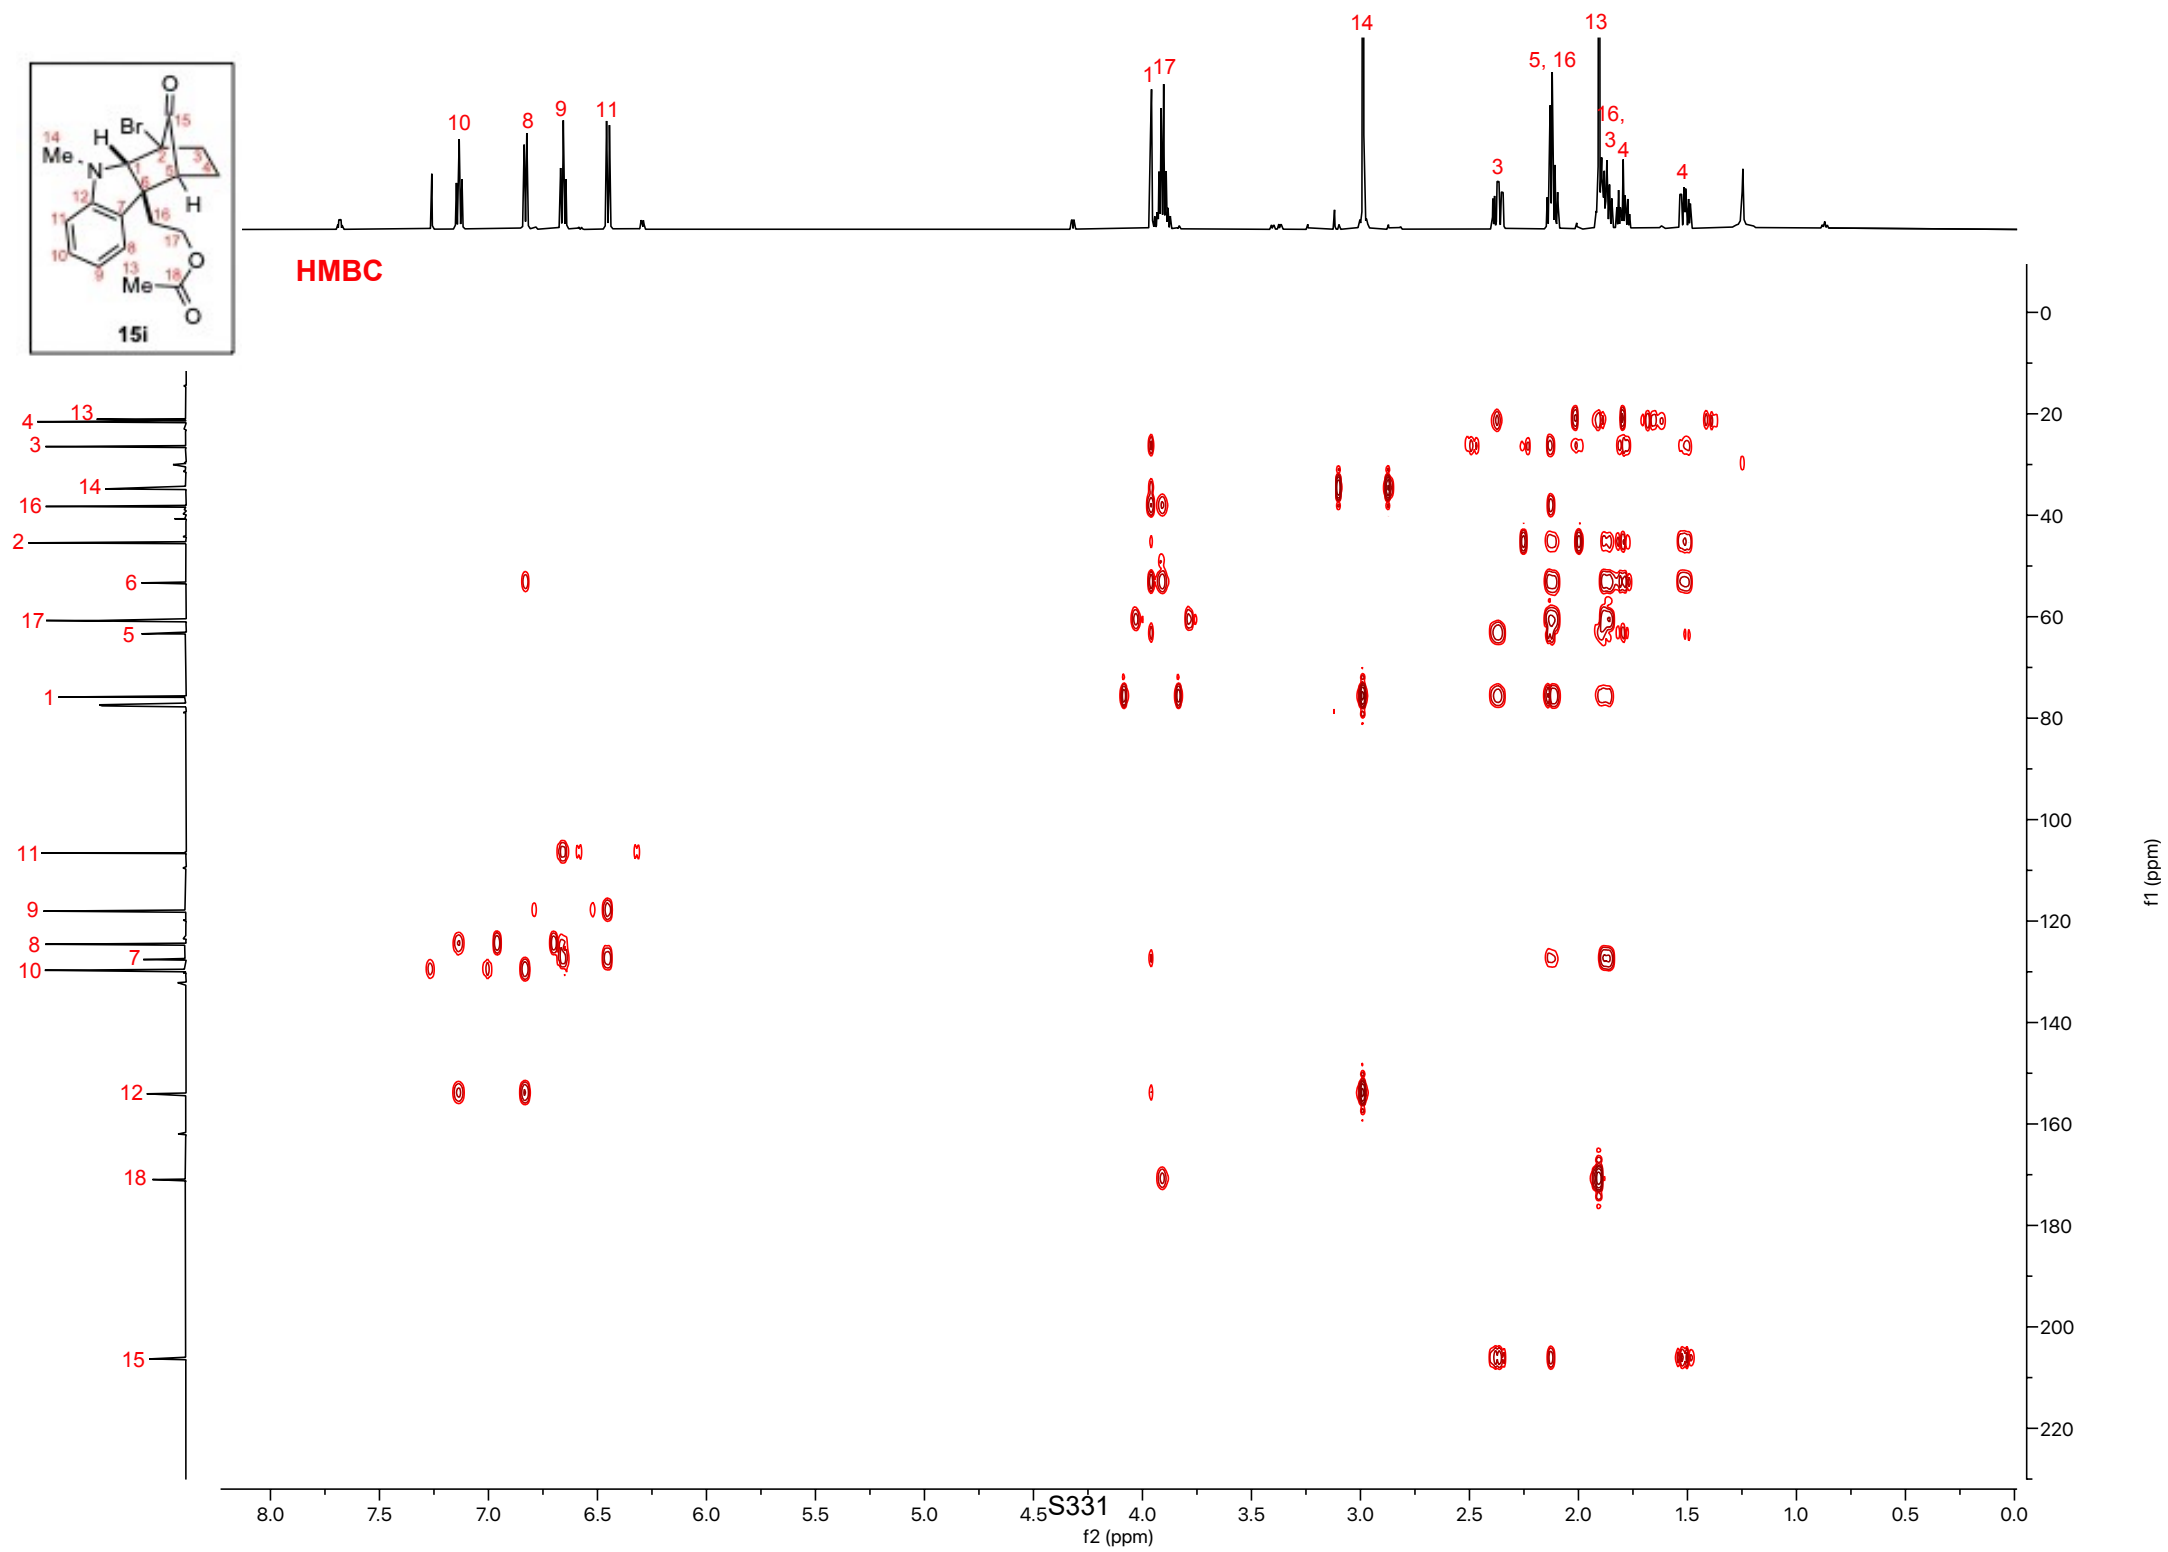

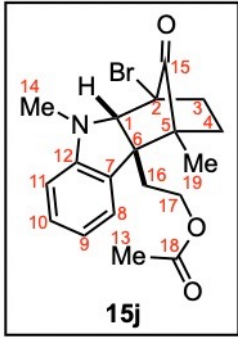

7.16  
7.16  
7.15  
7.14  
7.13  
7.13  
6.88  
6.87  
6.86  
6.86  
6.66  
6.66  
6.65  
6.65  
6.64  
6.64  
6.45  
6.44

3.96  
3.96  
3.90  
3.90  
3.89  
3.89  
3.88  
3.88  
3.87  
3.86  
3.78  
3.76  
3.76  
3.75  
3.75  
3.74  
3.74

2.99

2.43  
2.43  
2.41  
2.41  
2.41  
2.41  
2.39  
2.39

2.18  
2.17  
2.16  
2.16  
2.15  
2.15  
2.14  
2.13  
2.13  
1.93  
1.93  
1.92  
1.92  
1.91  
1.91  
1.90  
1.90  
1.89  
1.89  
1.67  
1.66  
1.65  
1.65  
1.64  
1.64  
1.63  
1.63  
1.62  
1.61  
1.60  
1.60  
1.59  
1.58  
1.57  
1.57  
1.51  
1.51  
1.49  
1.48  
1.47  
1.46  
1.17

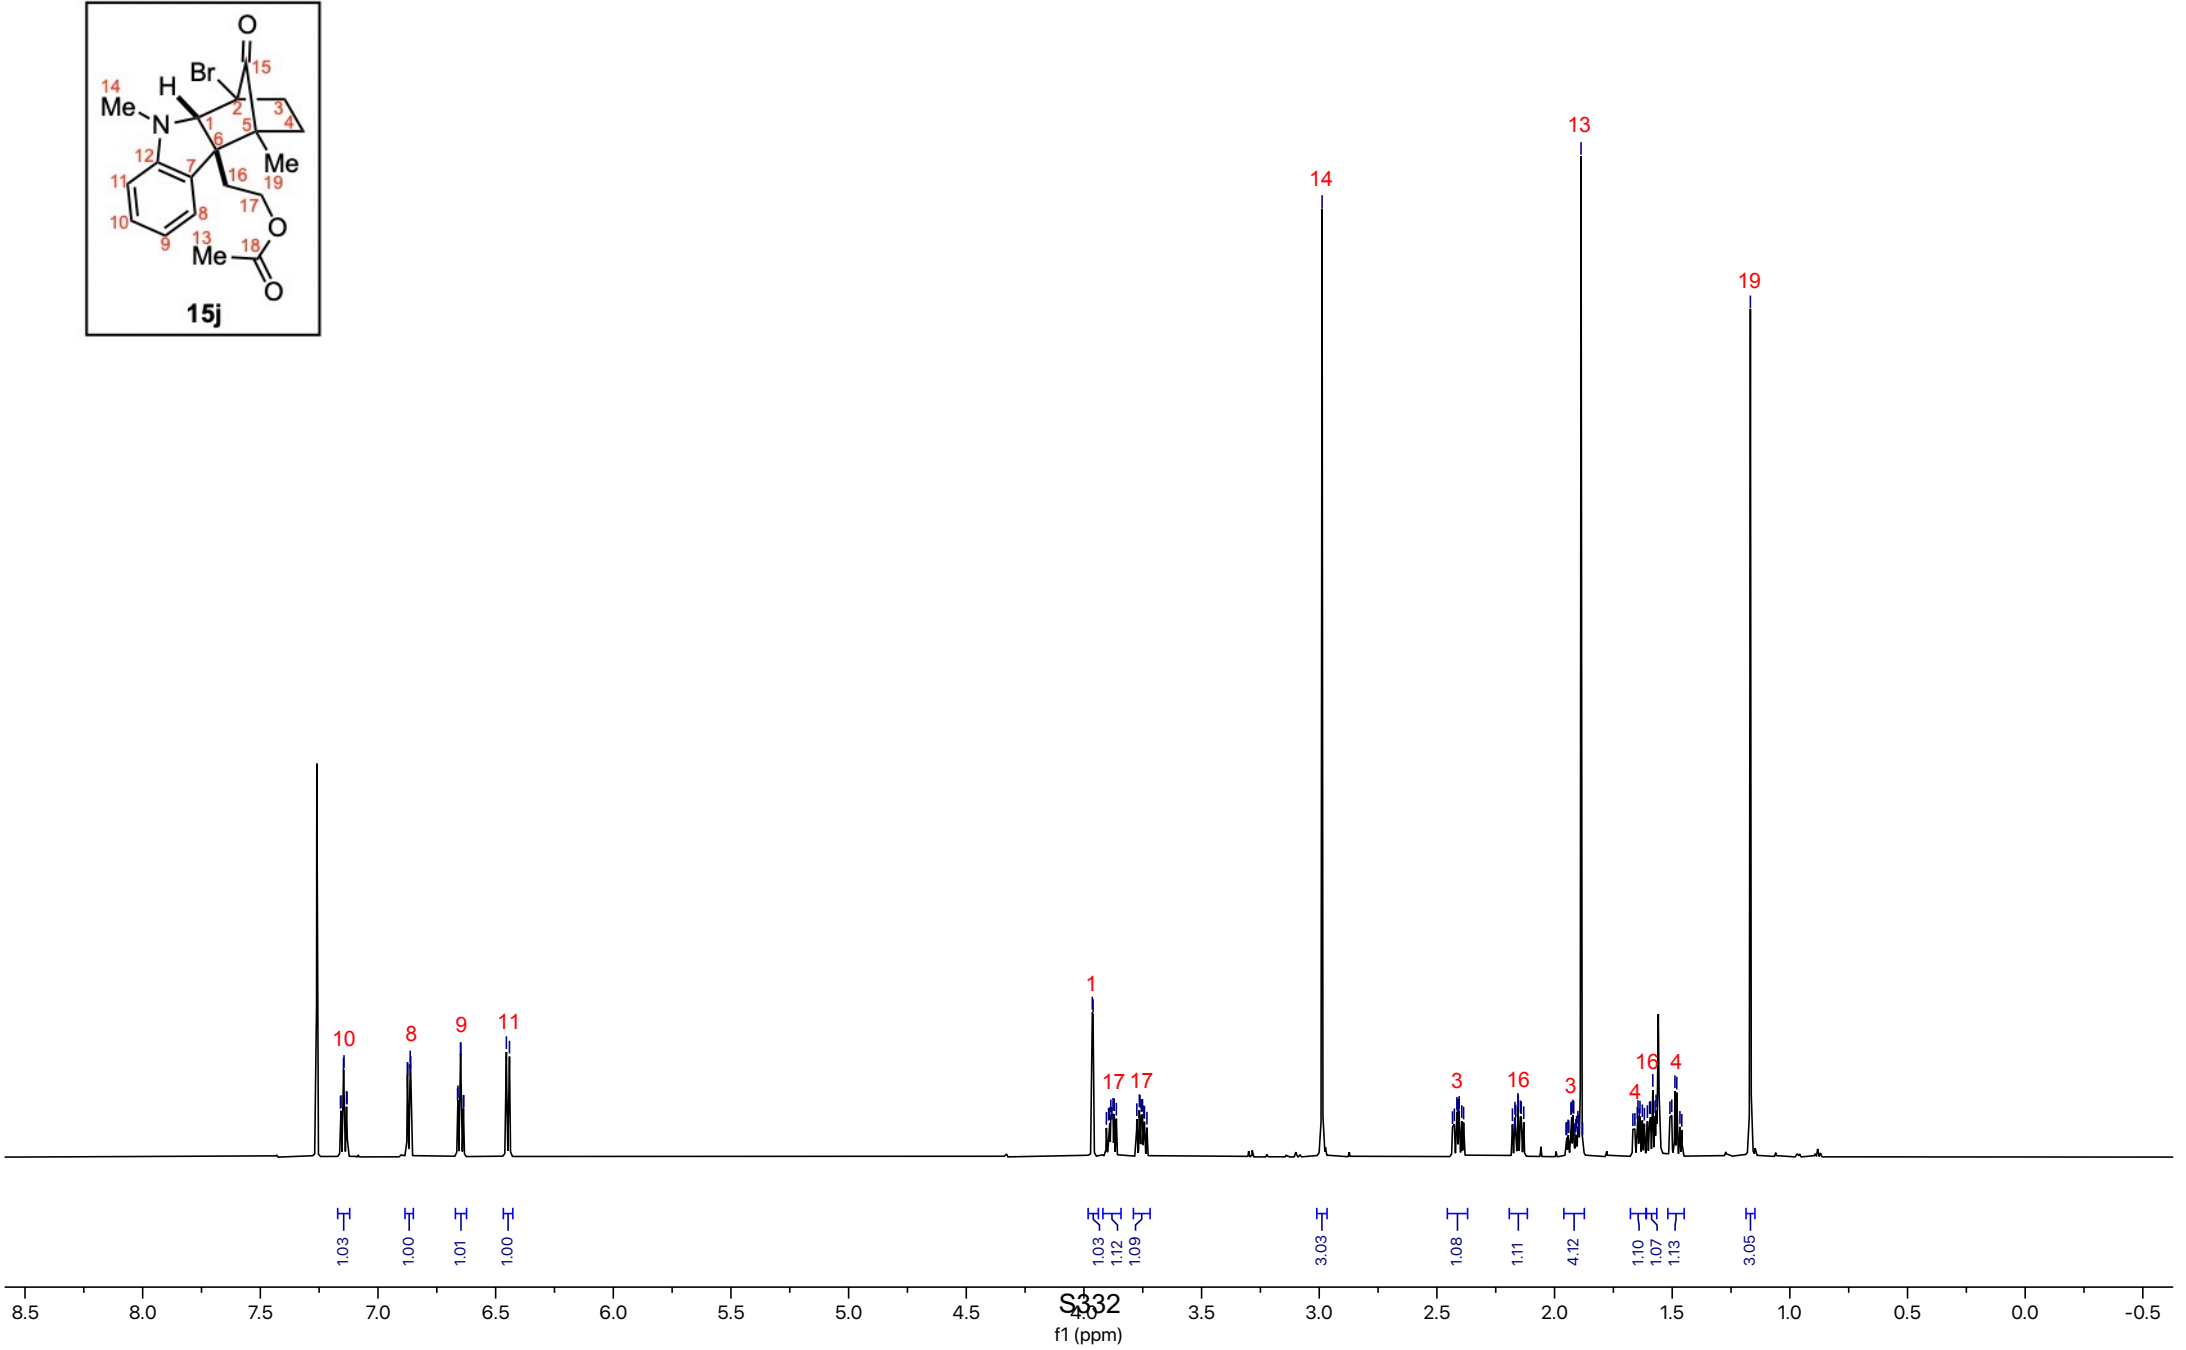



— 208.25

— 171.04

— 153.87

— 129.70

— 127.76

— 123.93

— 117.97

— 106.40

— 75.28

— 63.44

— 61.07

— 54.65

— 45.73

— 35.28

— 34.68

— 29.80

— 27.32

— 21.08

— 12.21

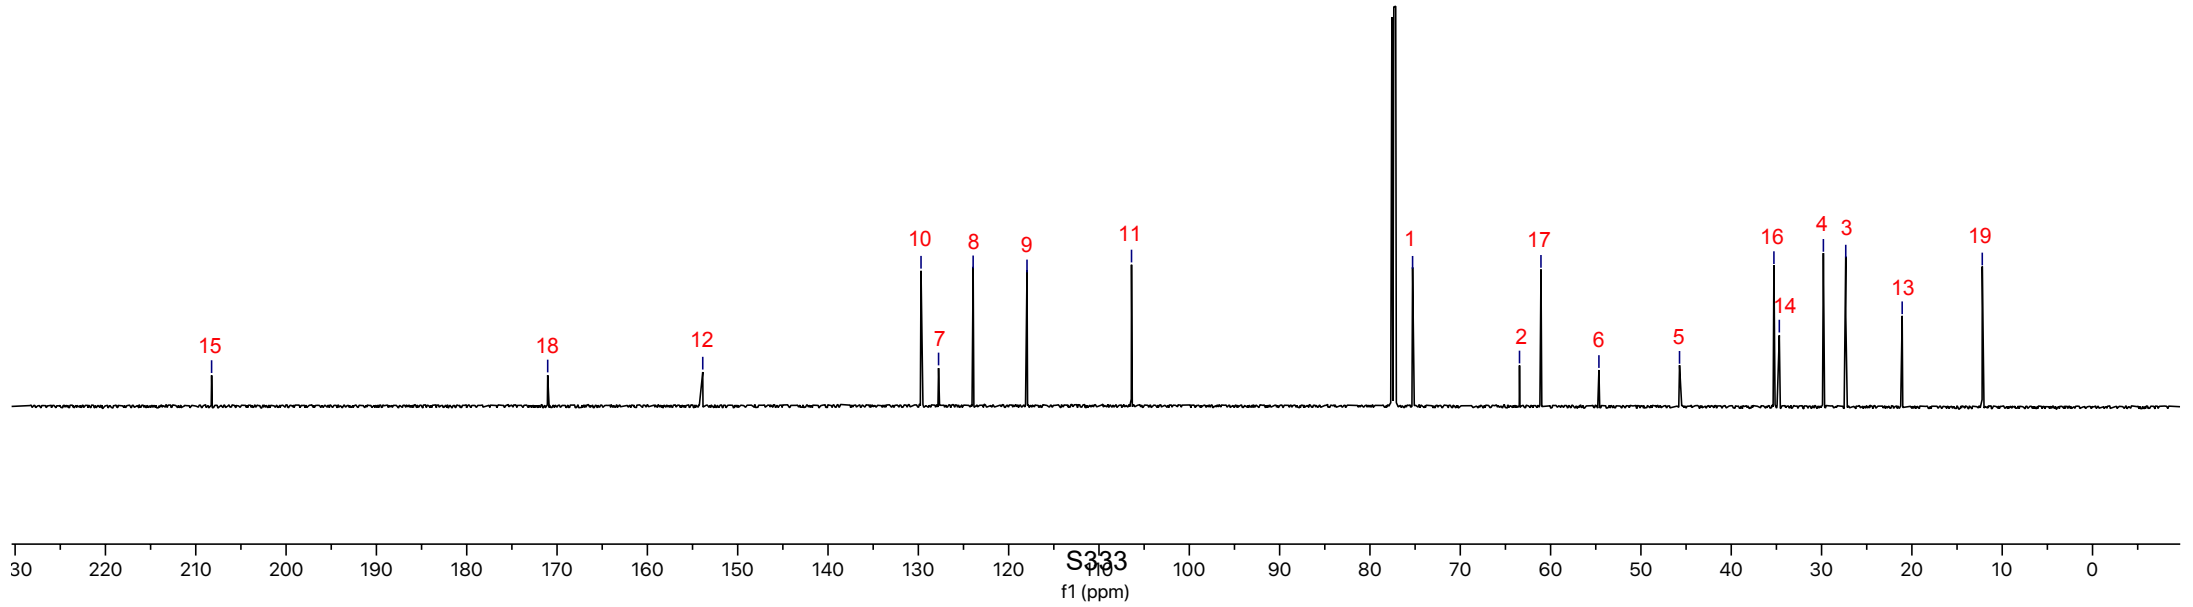

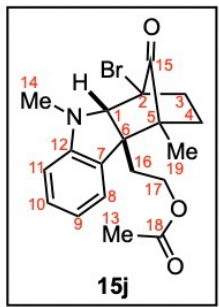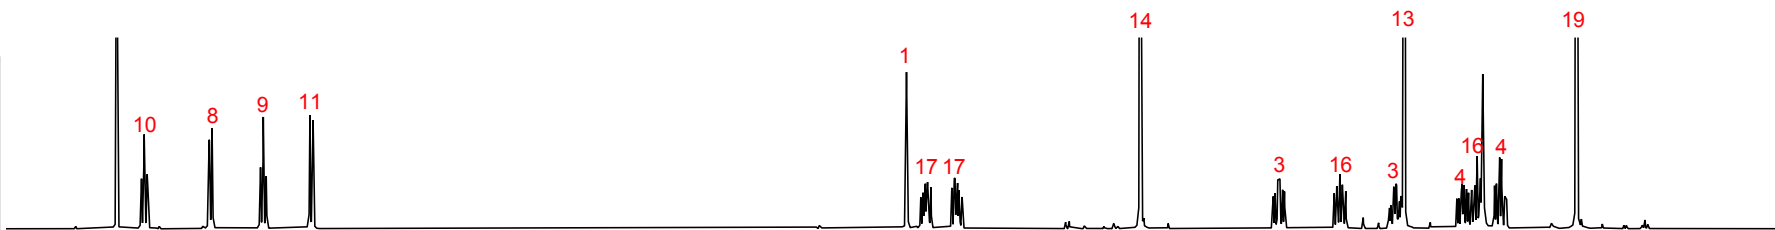

**COSY**

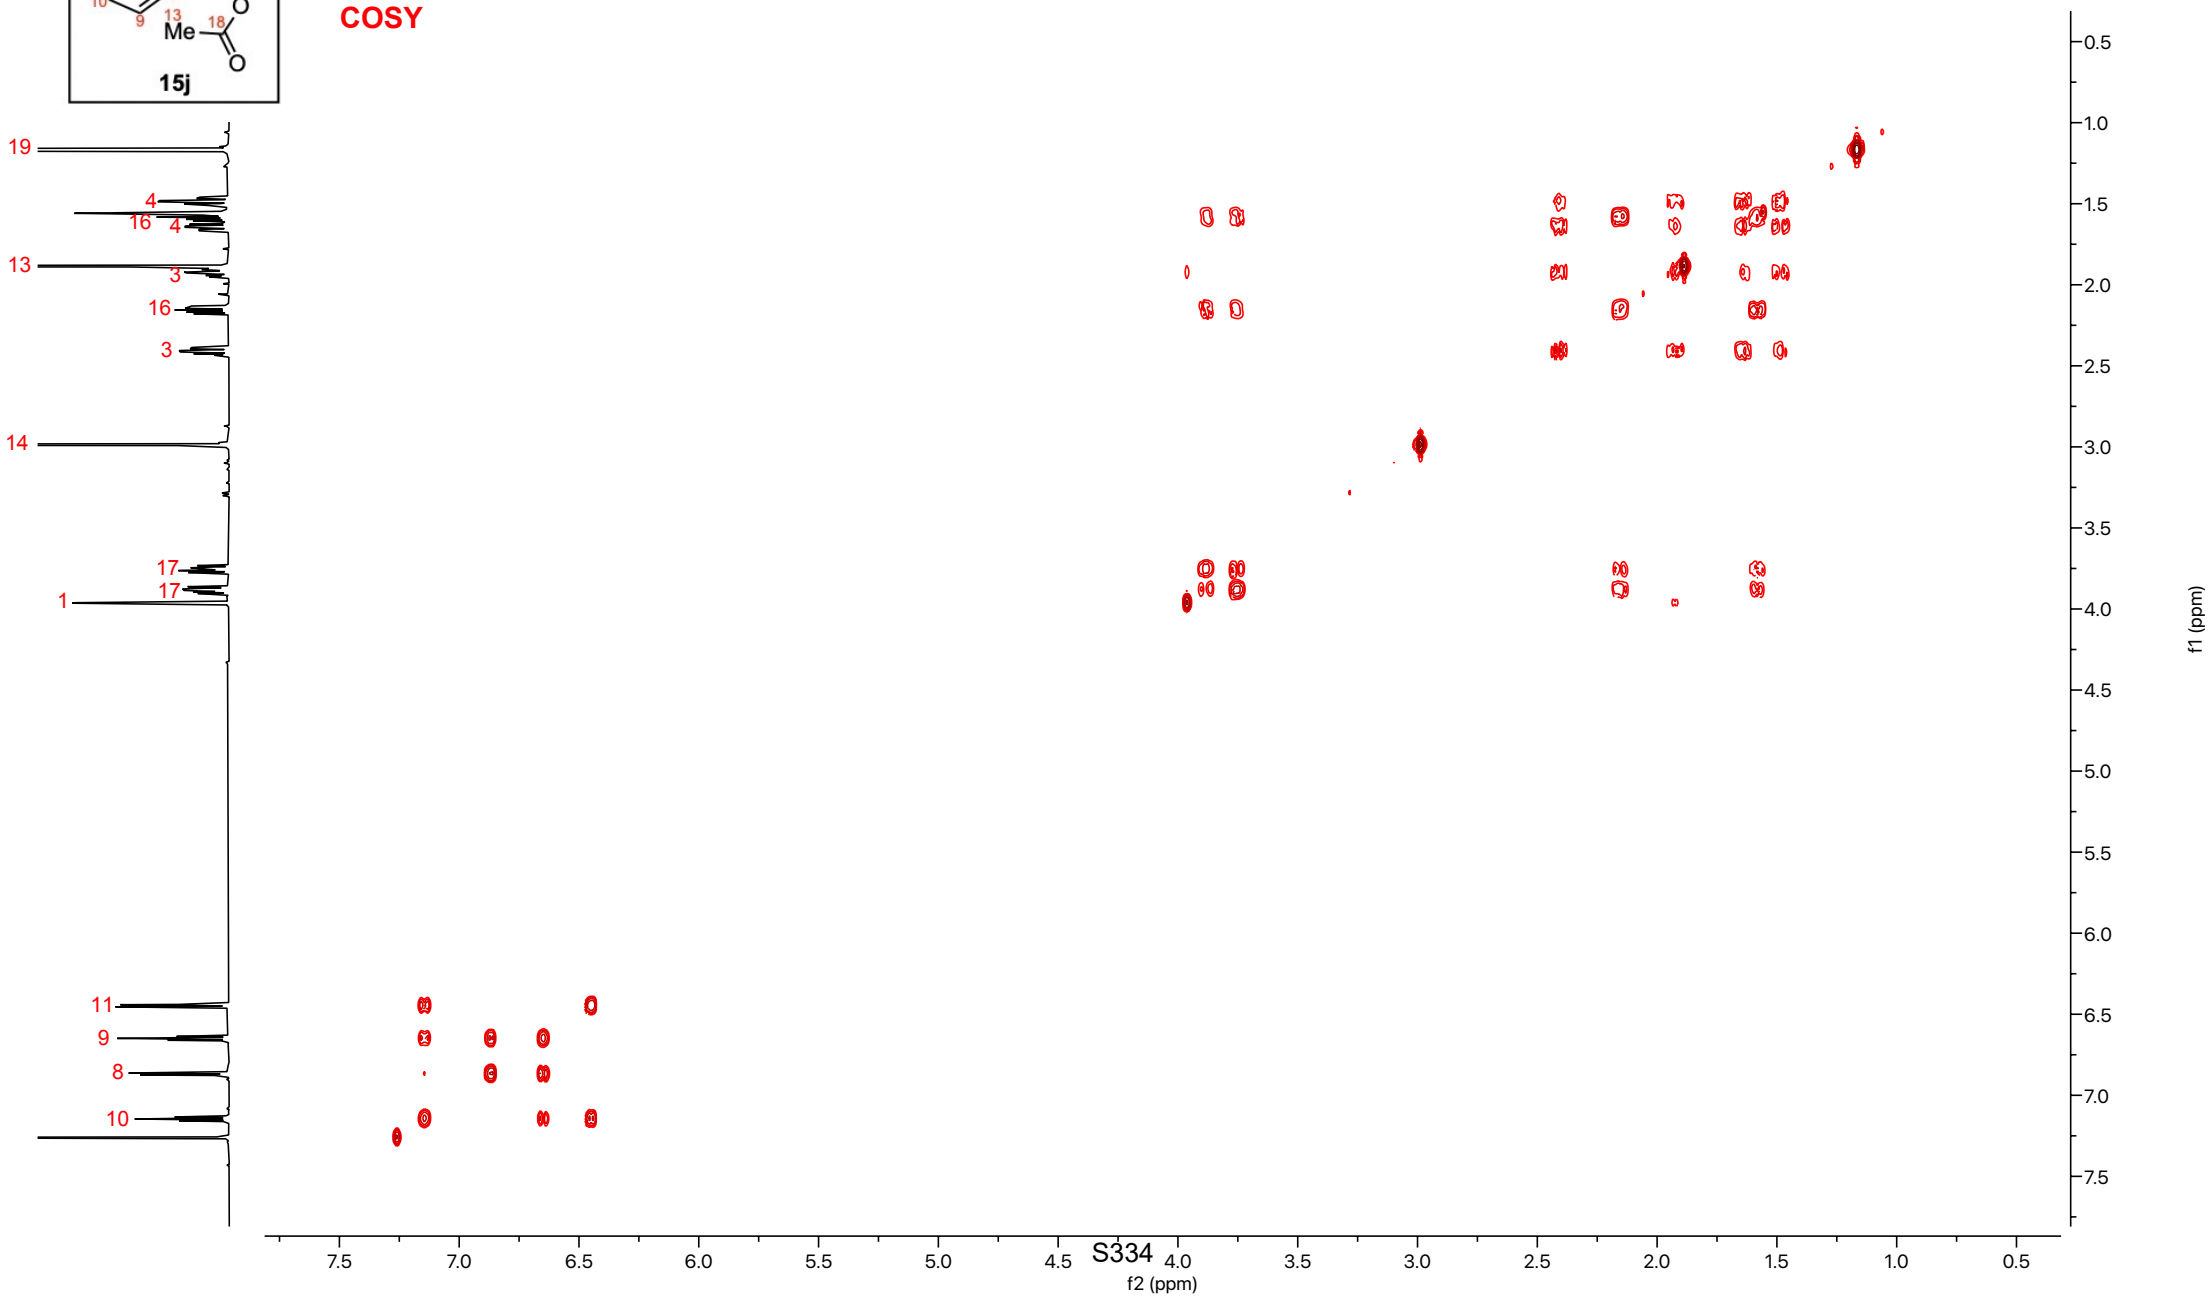

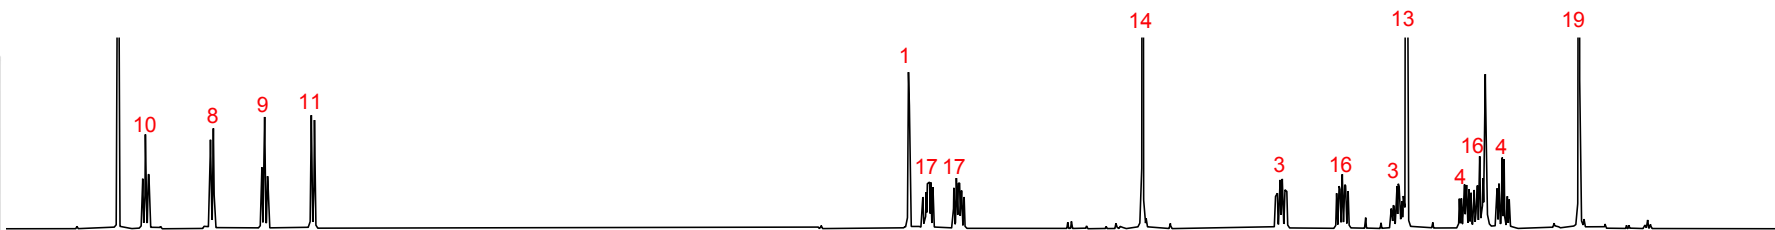

**HSQC**

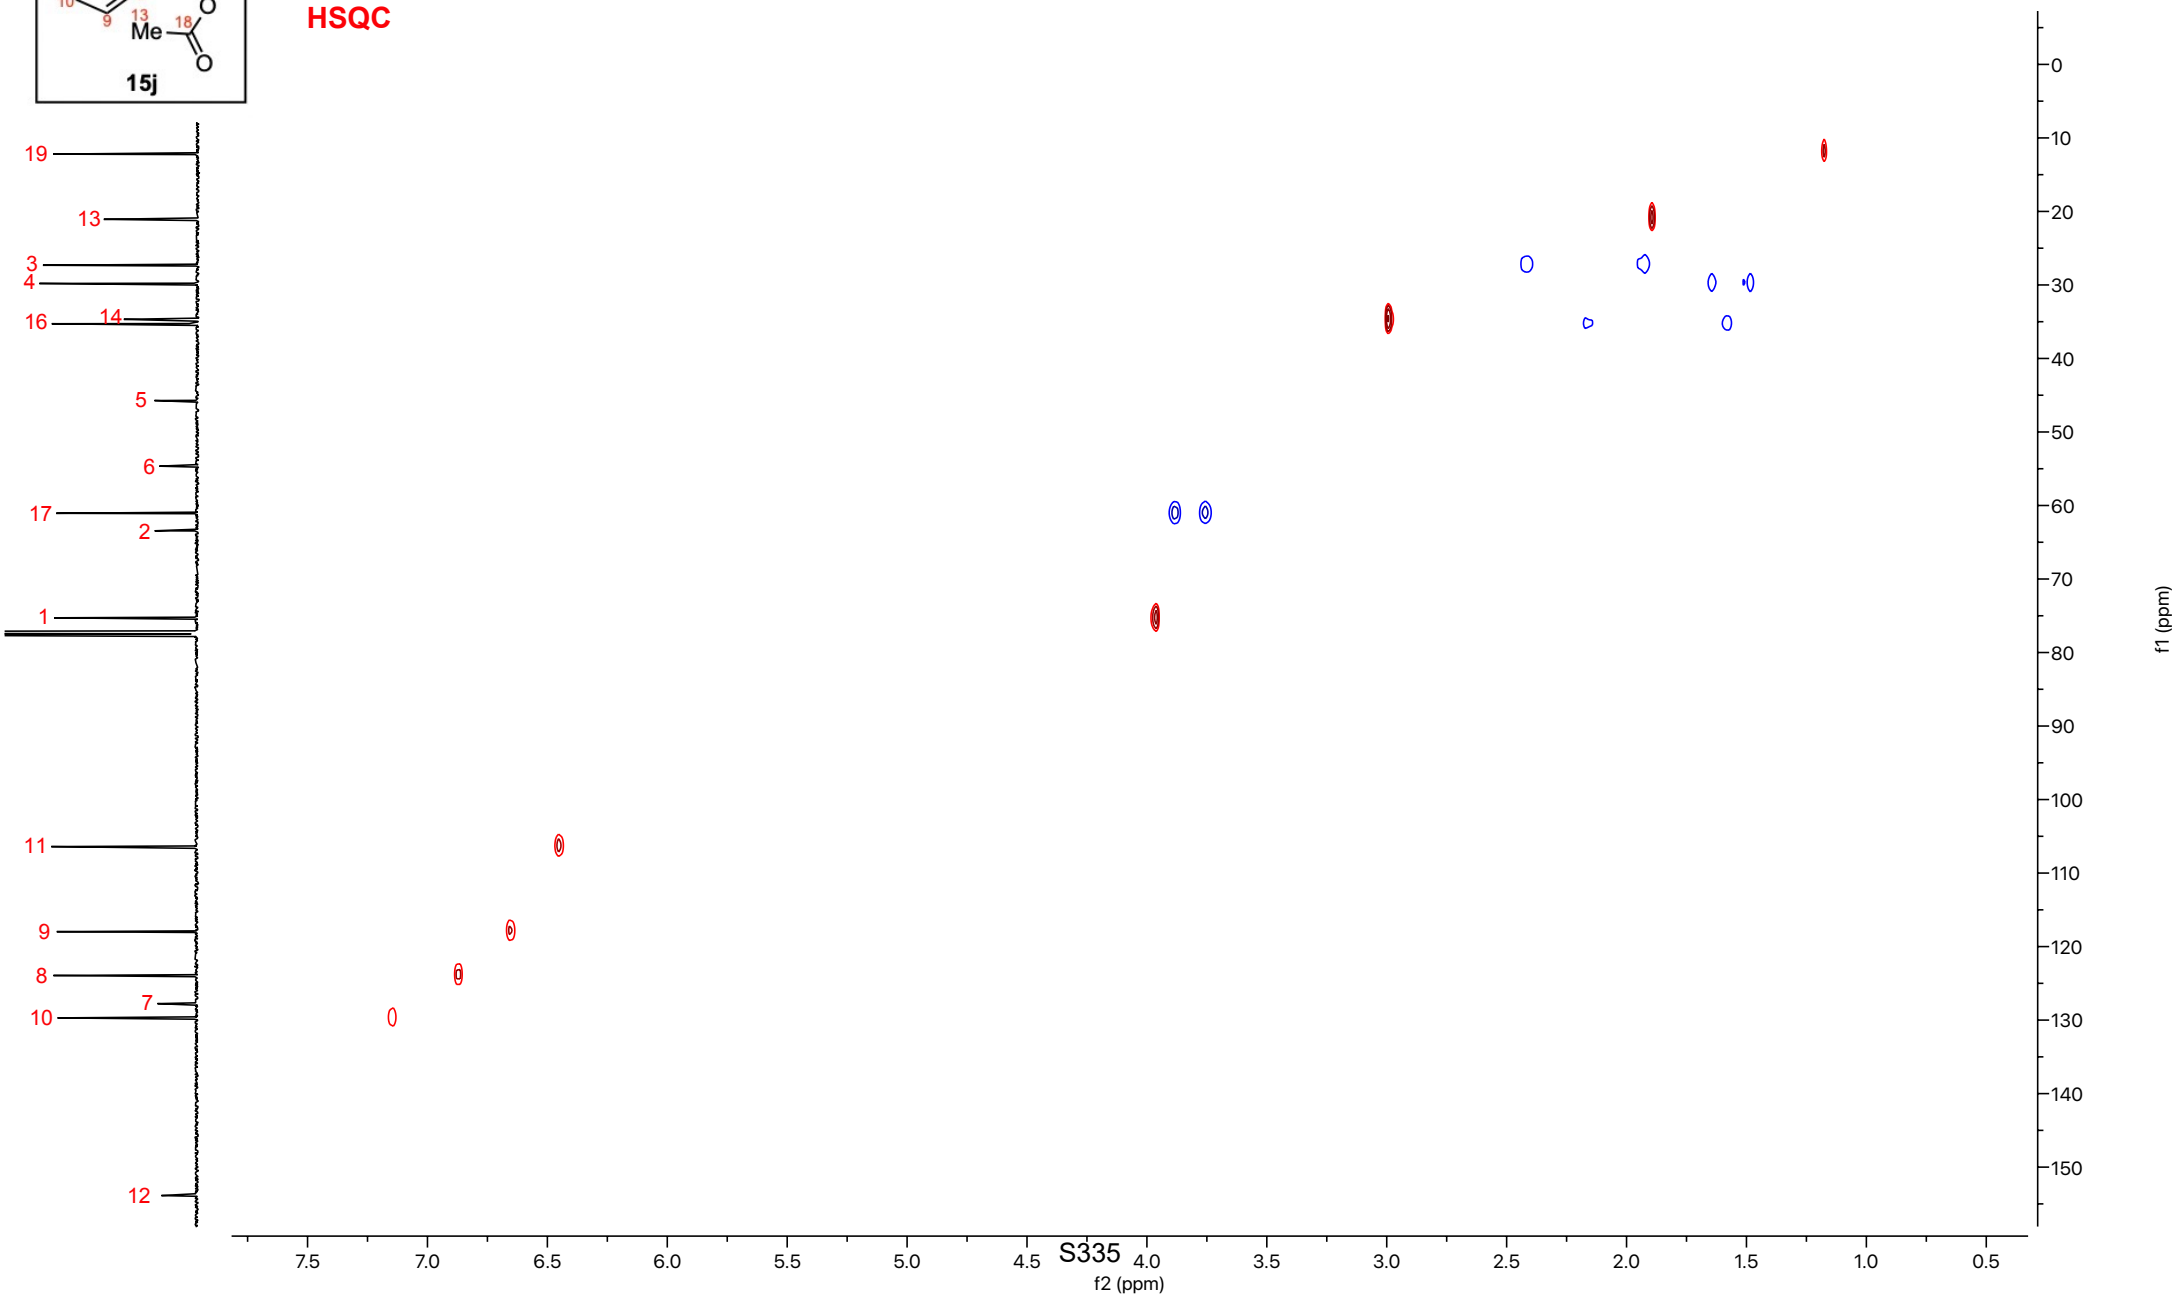



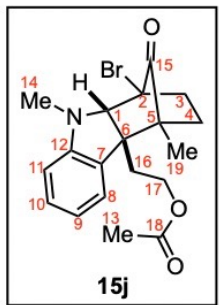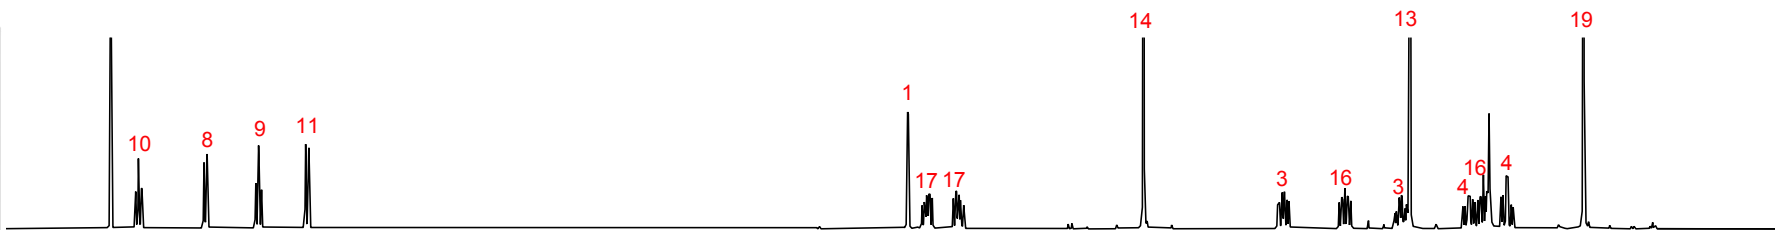

**HMBC**

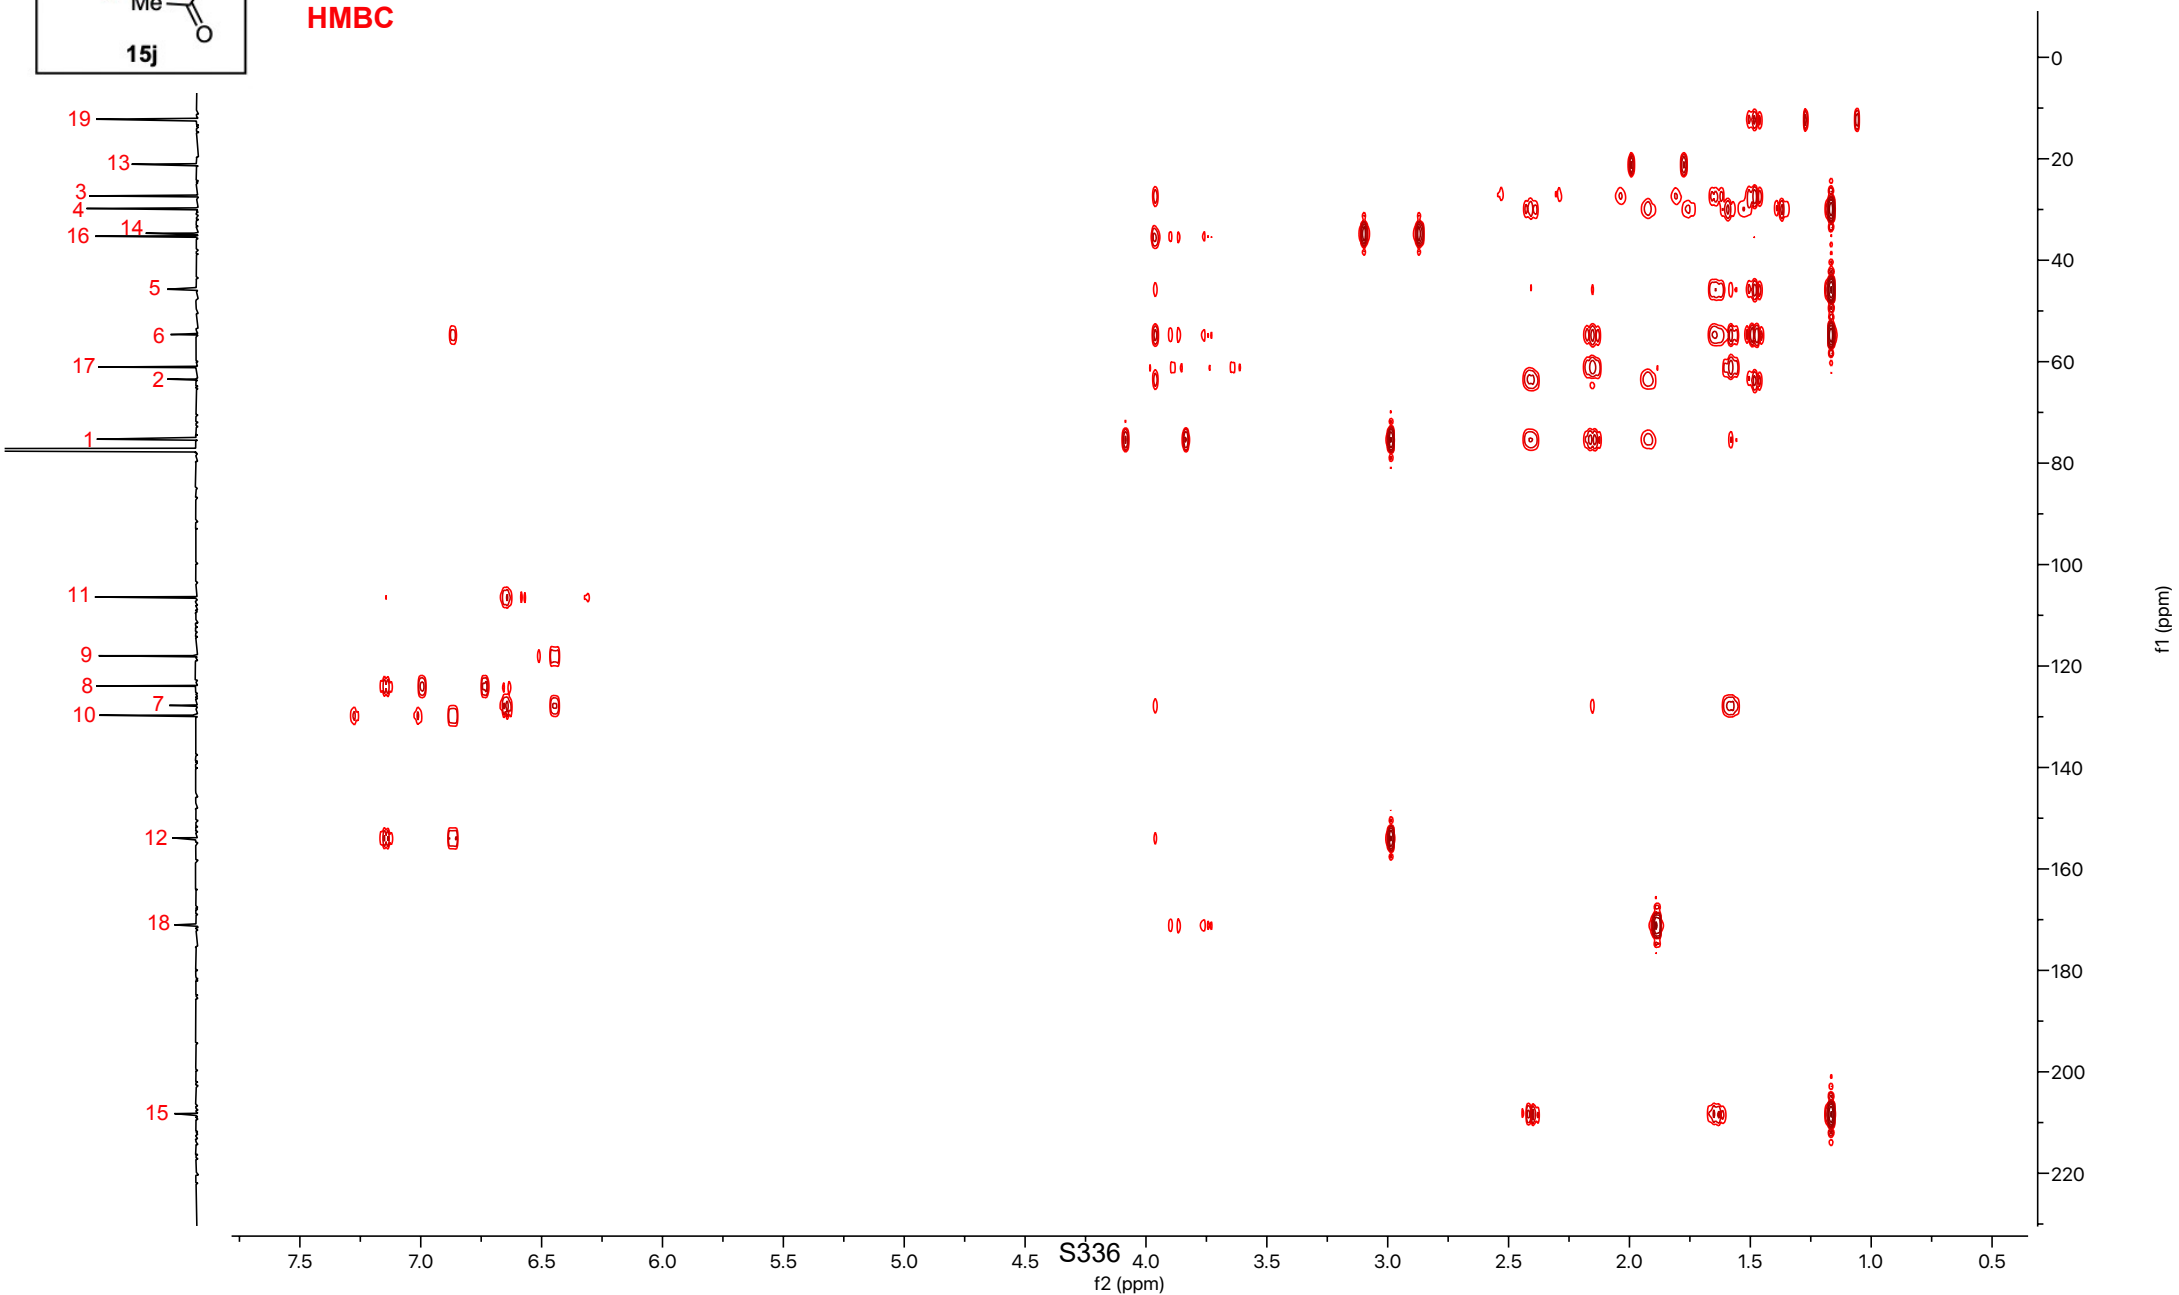

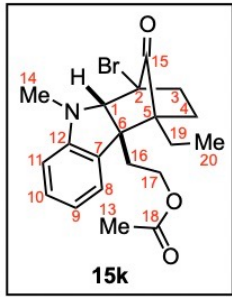

7.15  
7.14  
7.13  
7.12  
6.89  
6.88  
6.87  
6.65  
6.64  
6.63  
6.63  
6.62  
6.62  
6.44  
6.43

3.91  
3.88  
3.87  
3.87  
3.86  
3.86  
3.85  
3.84  
3.75  
3.74  
3.73  
3.72  
3.72  
3.71  
3.71  
3.70

2.98  
2.46  
2.45  
2.44  
2.43  
2.43  
2.43  
2.42  
2.41

2.18  
2.18  
2.17  
2.16  
2.15  
1.92  
1.92  
1.91  
1.91  
1.90  
1.89  
1.89  
1.88  
1.83  
1.82  
1.81  
1.80  
1.62  
1.61  
1.60  
1.59  
1.59  
1.58  
1.57  
1.56  
1.54  
1.53  
1.52  
1.48  
1.47  
1.47  
1.46  
1.46  
0.97  
0.96

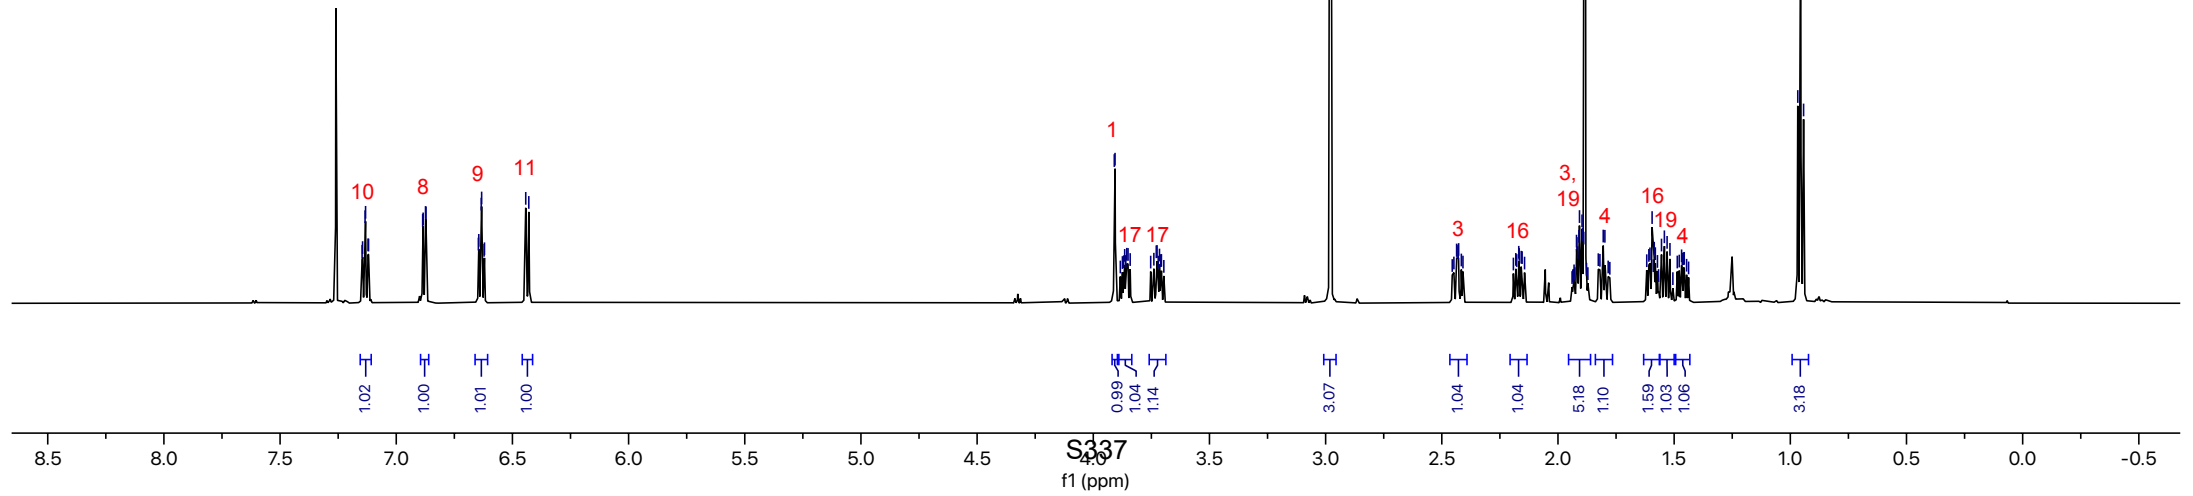

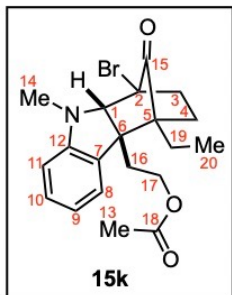

— 207.87

— 171.01

— 154.05

— 129.63  
— 127.69  
— 124.63

— 117.88

— 106.34

— 75.25

— 63.65  
— 61.13

— 55.57

— 49.18

— 34.96  
— 34.67

— 27.13  
— 24.23  
— 21.07  
— 18.55

— 9.50

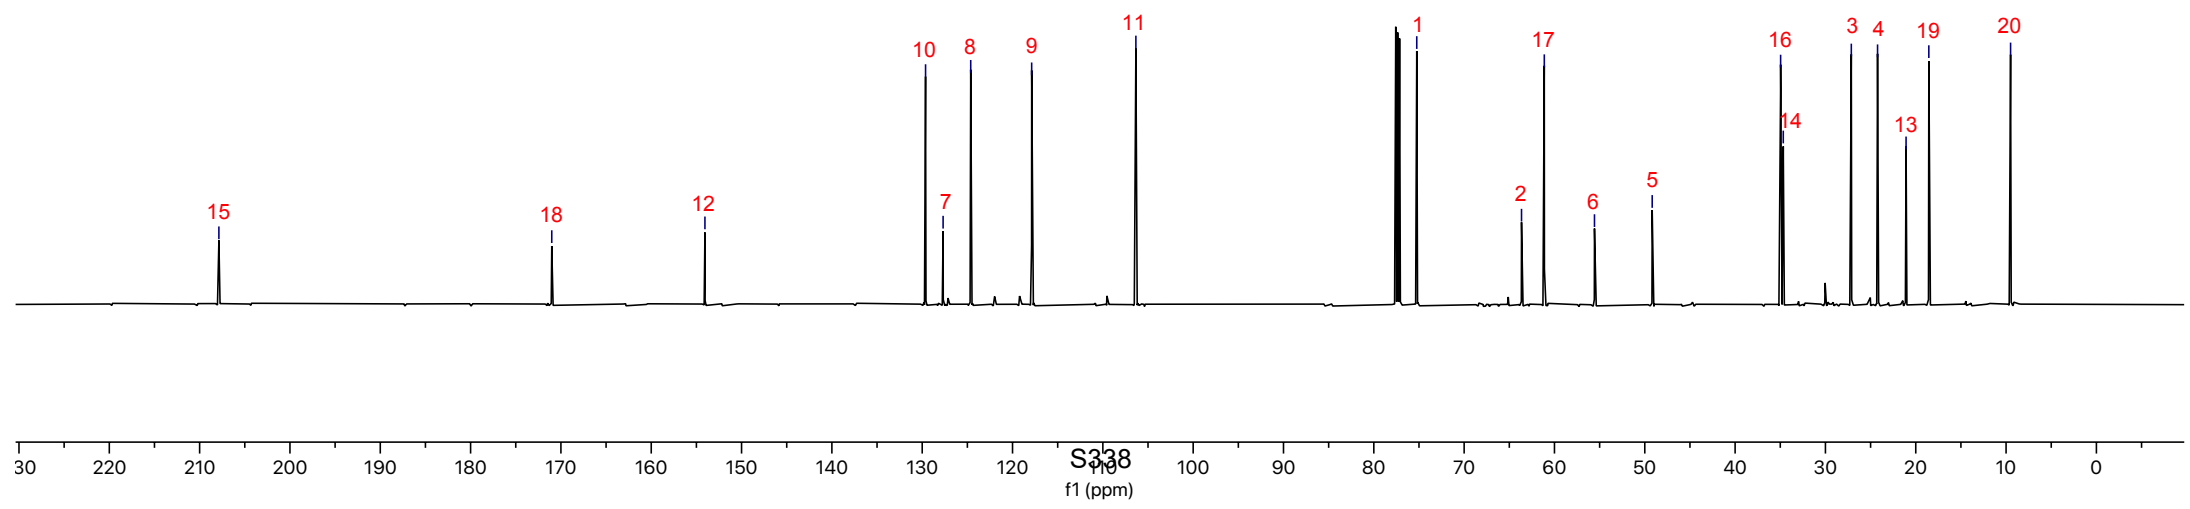

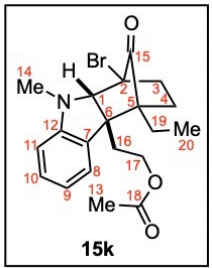

**COSY**

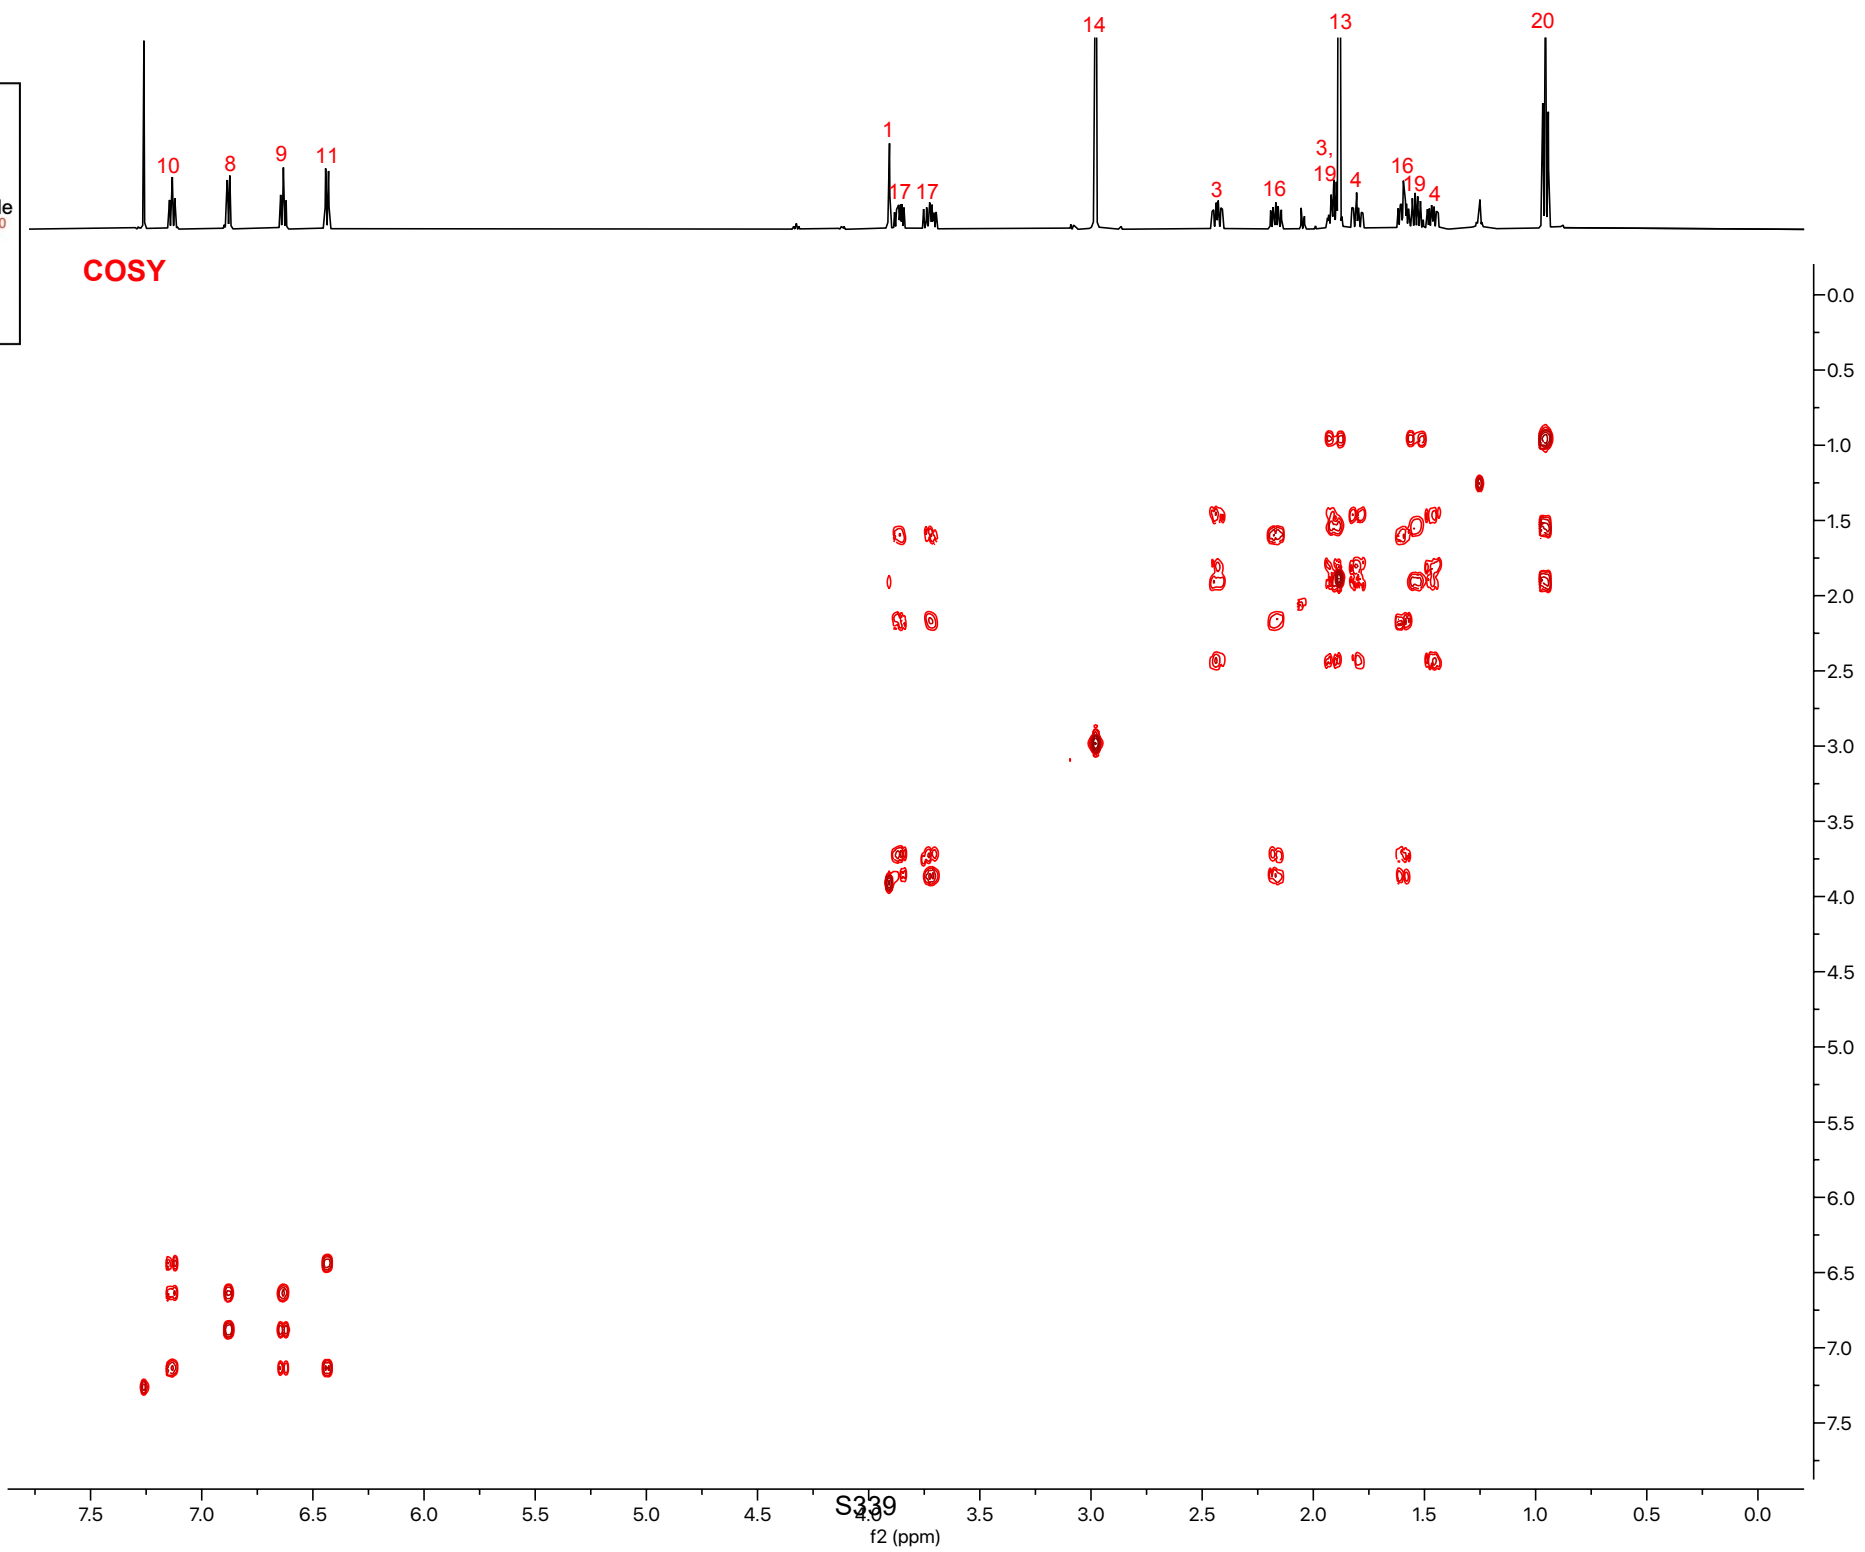

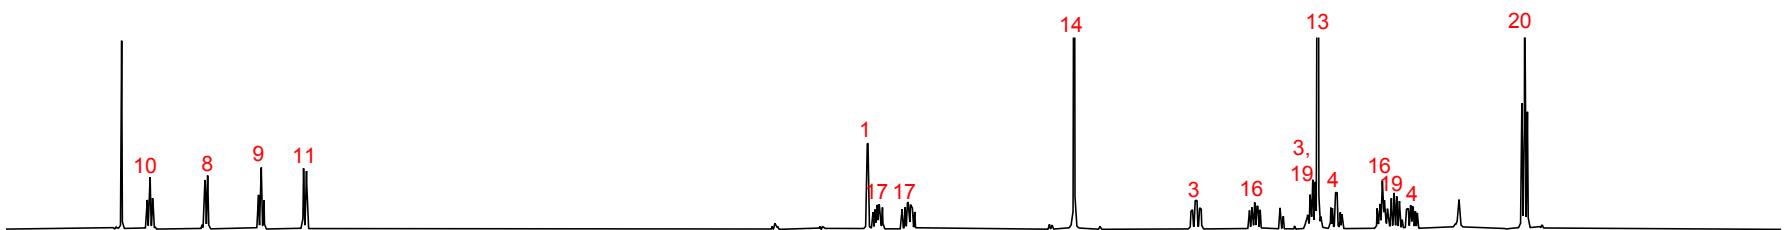

**HSQC**

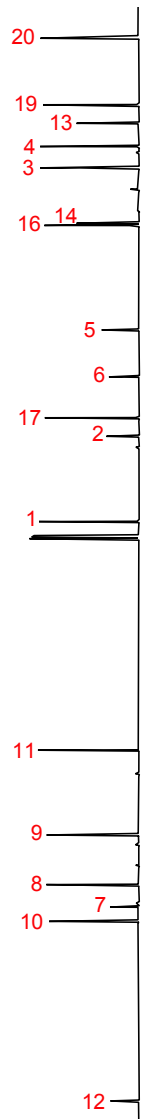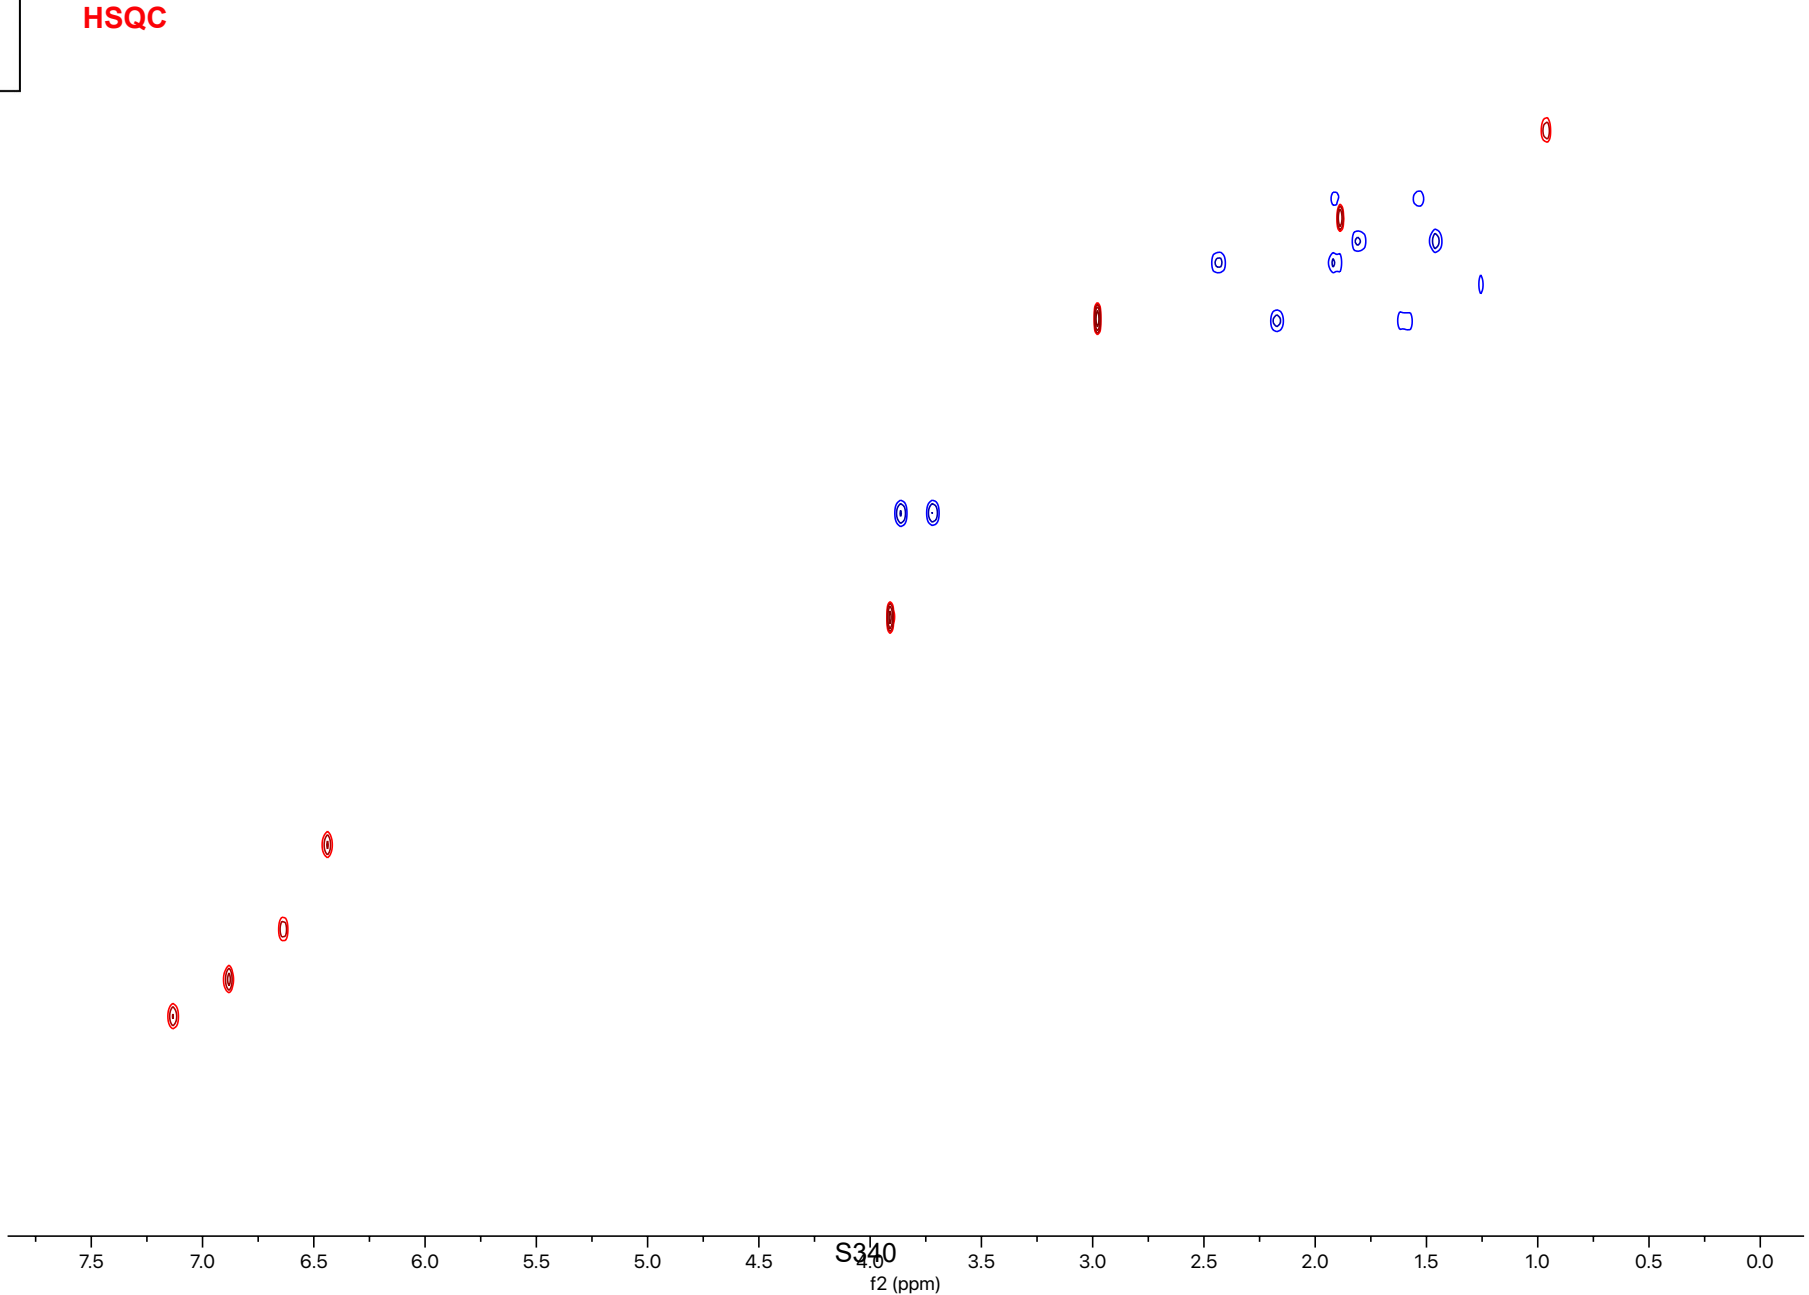

f1 (ppm)

S340

f2 (ppm)

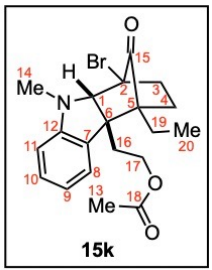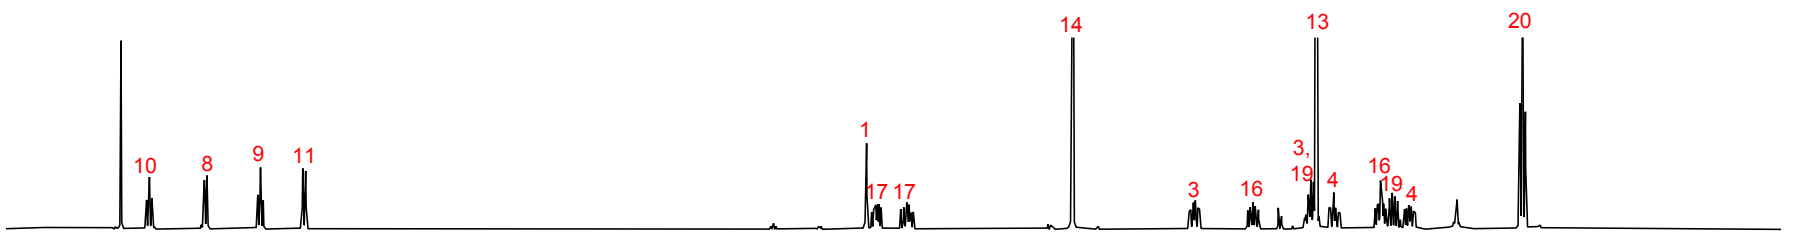

**HMBC**

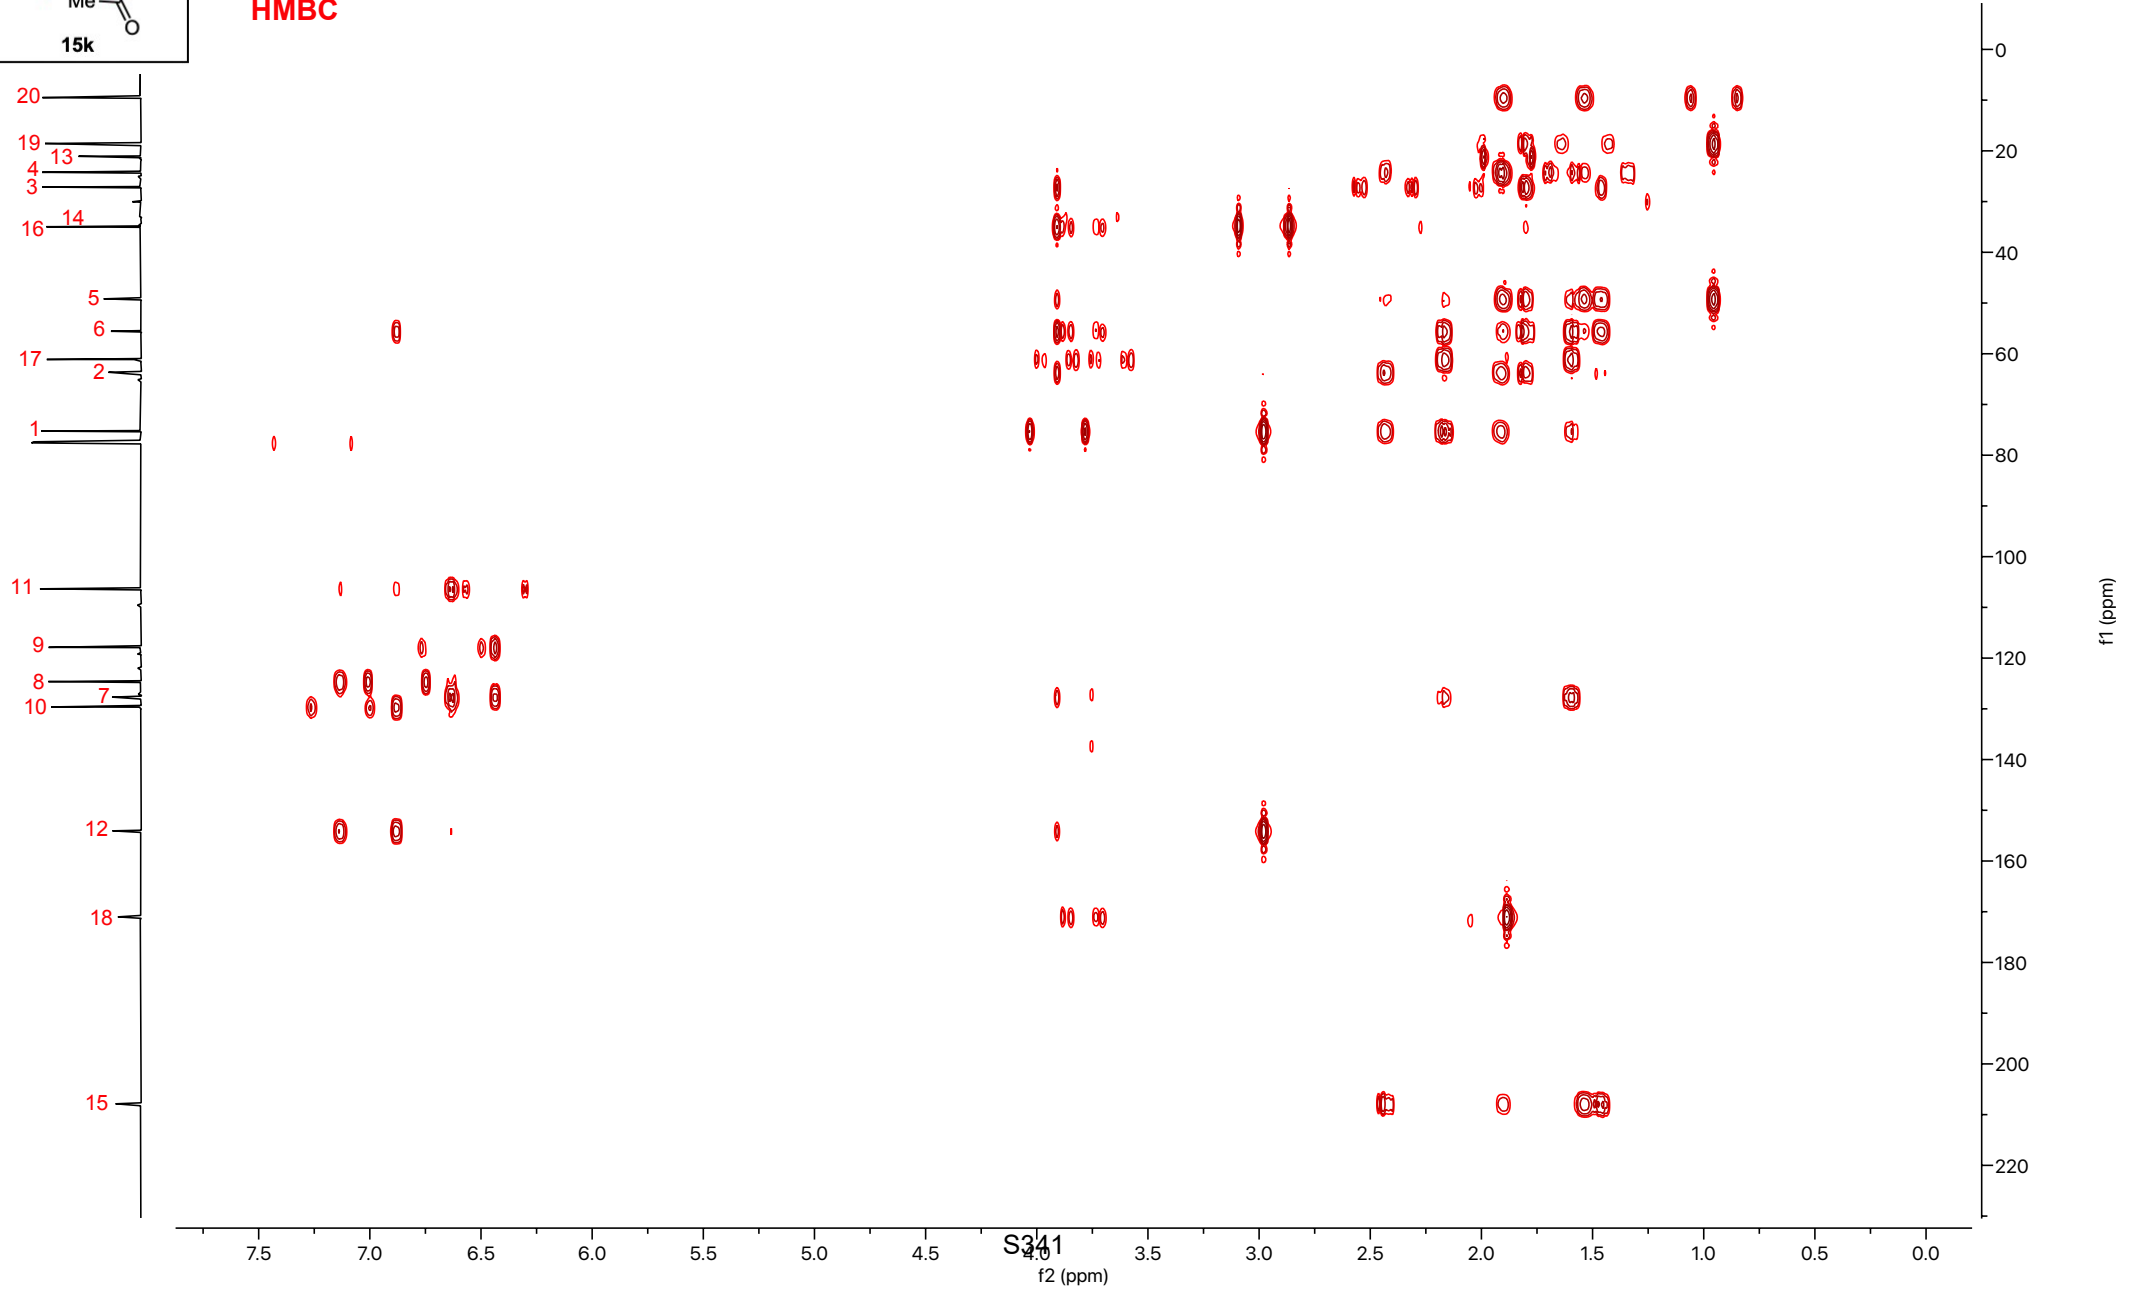

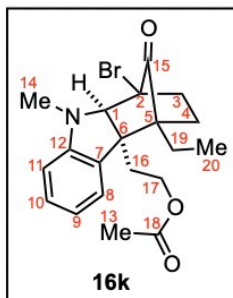

7.08  
7.08  
7.07  
7.06  
7.05  
7.05  
6.87  
6.87  
6.86  
6.85  
6.65  
6.65  
6.64  
6.64  
6.63  
6.62  
6.38  
6.38  
6.37  
6.37

3.66  
3.65  
3.65  
3.64  
3.64  
3.63  
3.63  
3.62  
3.76  
3.75  
3.75  
3.74  
3.74  
3.73  
3.73  
3.72  
3.56  
2.95

2.32  
2.32  
2.32  
2.30  
2.30  
2.28  
2.27  
2.26  
2.26  
2.25  
2.25  
2.24  
2.24  
2.23  
2.23  
2.22  
2.22  
2.21  
2.21  
2.14  
2.13  
2.13  
2.12  
2.12  
2.11  
2.11  
2.10  
2.10  
2.09  
1.98  
1.97  
1.96  
1.96  
1.95  
1.95  
1.73  
1.72  
1.71  
1.70  
1.65  
1.64  
1.63  
1.61  
1.57  
0.99  
0.98  
0.97

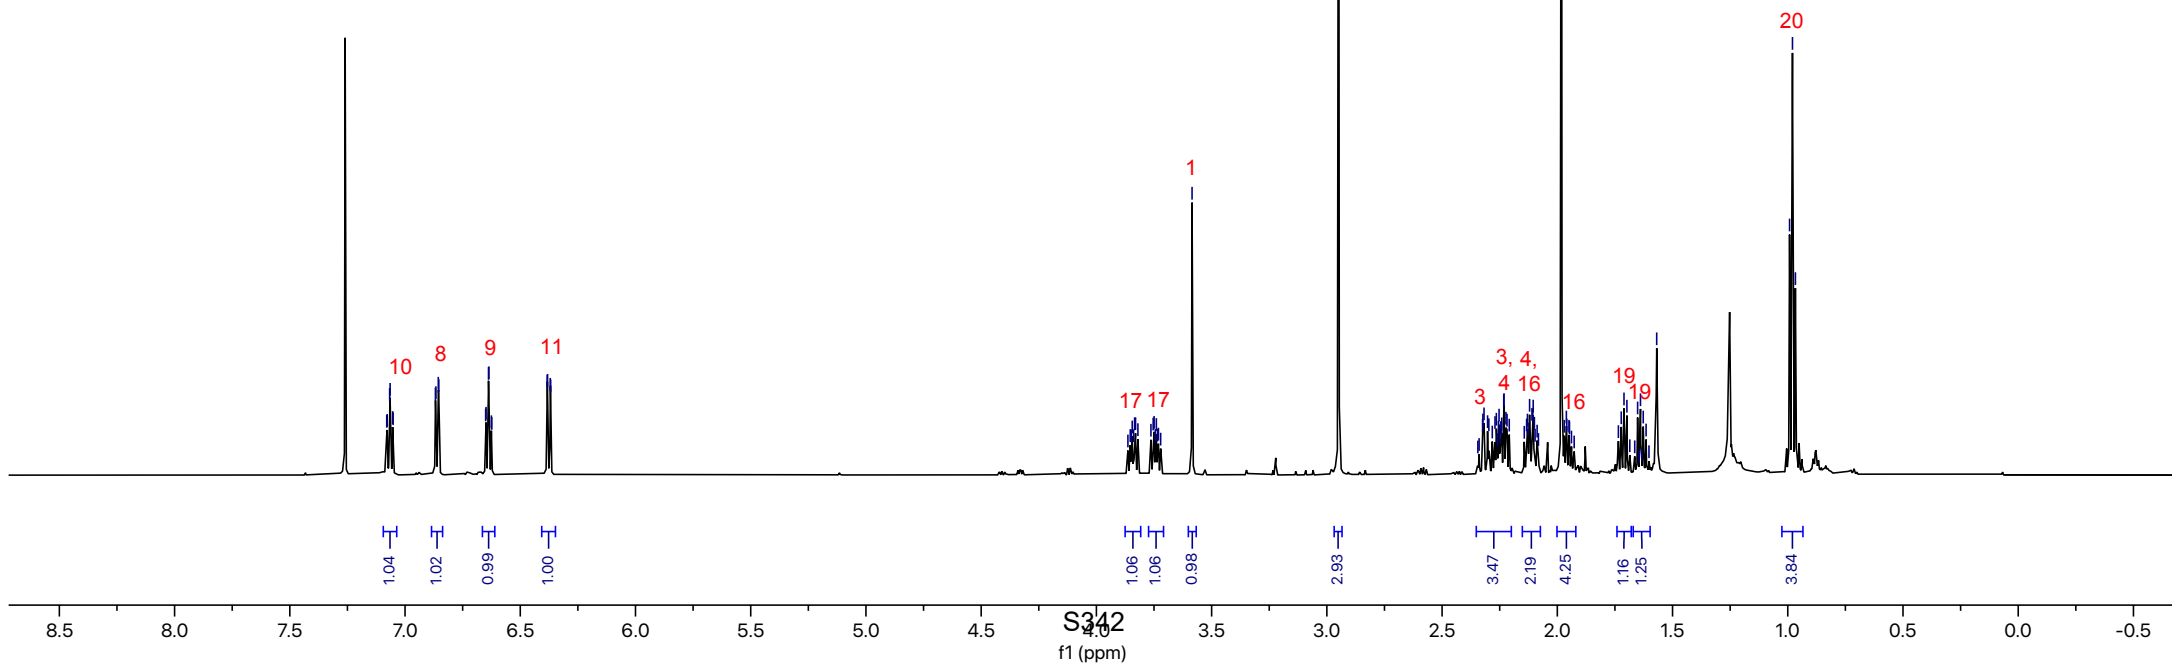

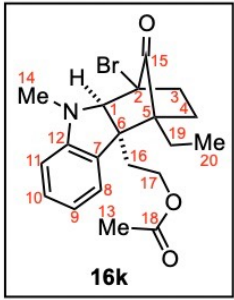

207.01

171.07

153.25

129.69

127.15

125.96

118.31

108.64

78.19

65.87

61.53

55.69

48.44

38.74

34.26

31.00

30.04

23.09

21.29

19.55

9.98

15

18

12

10

7

8

9

11

1

2

17

6

5

14

16

3

4

19

13

20

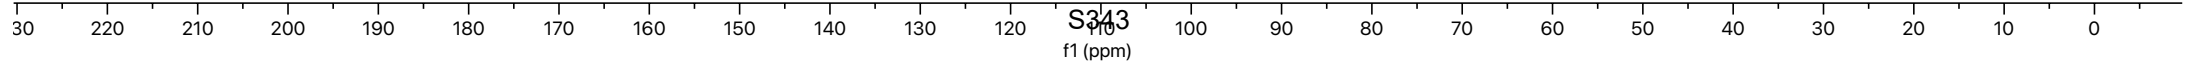



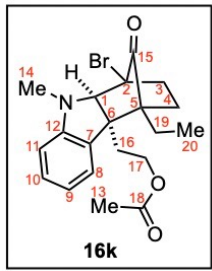

**COSY**

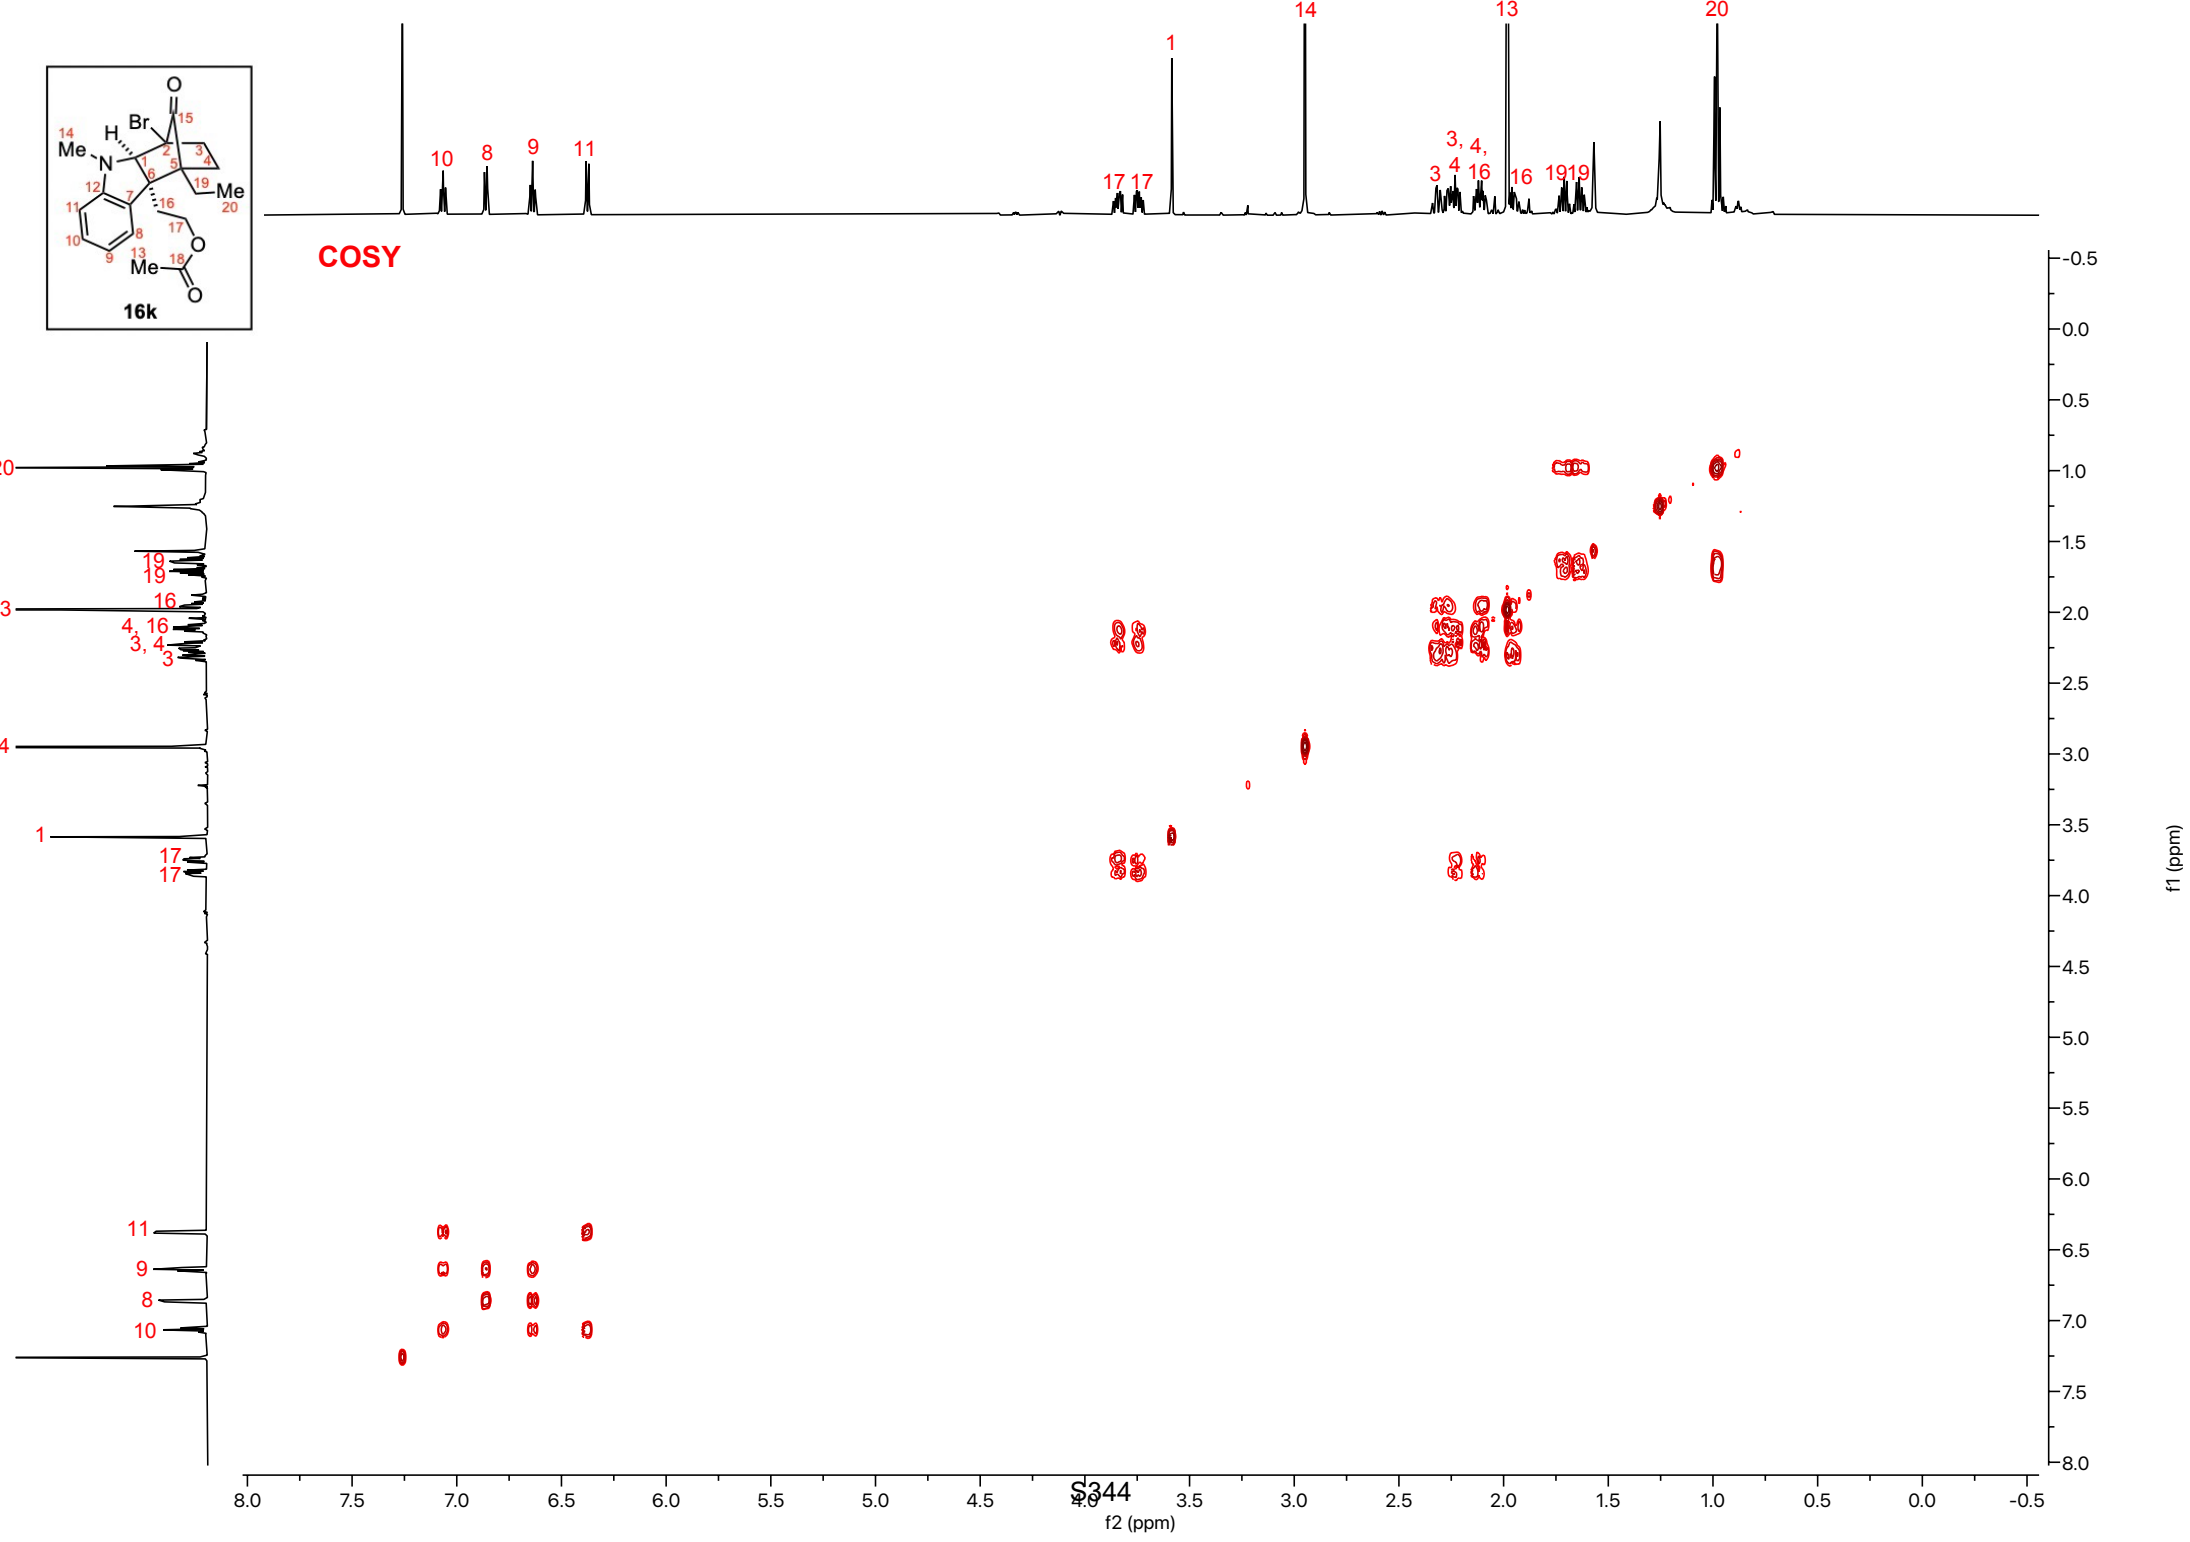

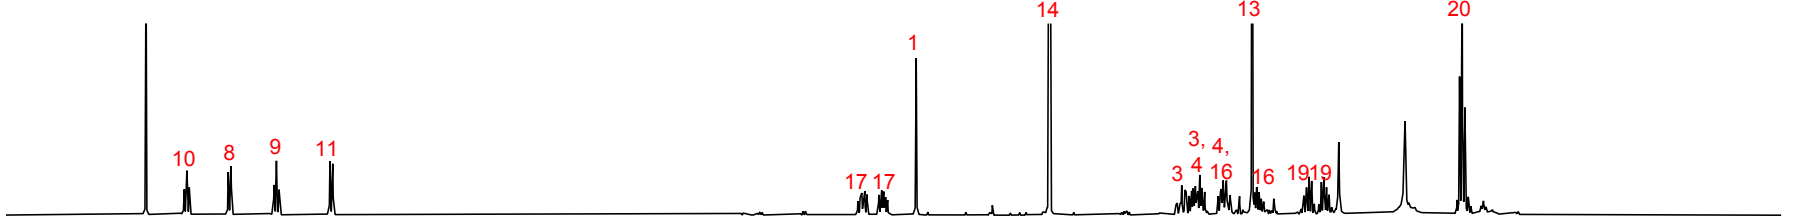

**HSQC**

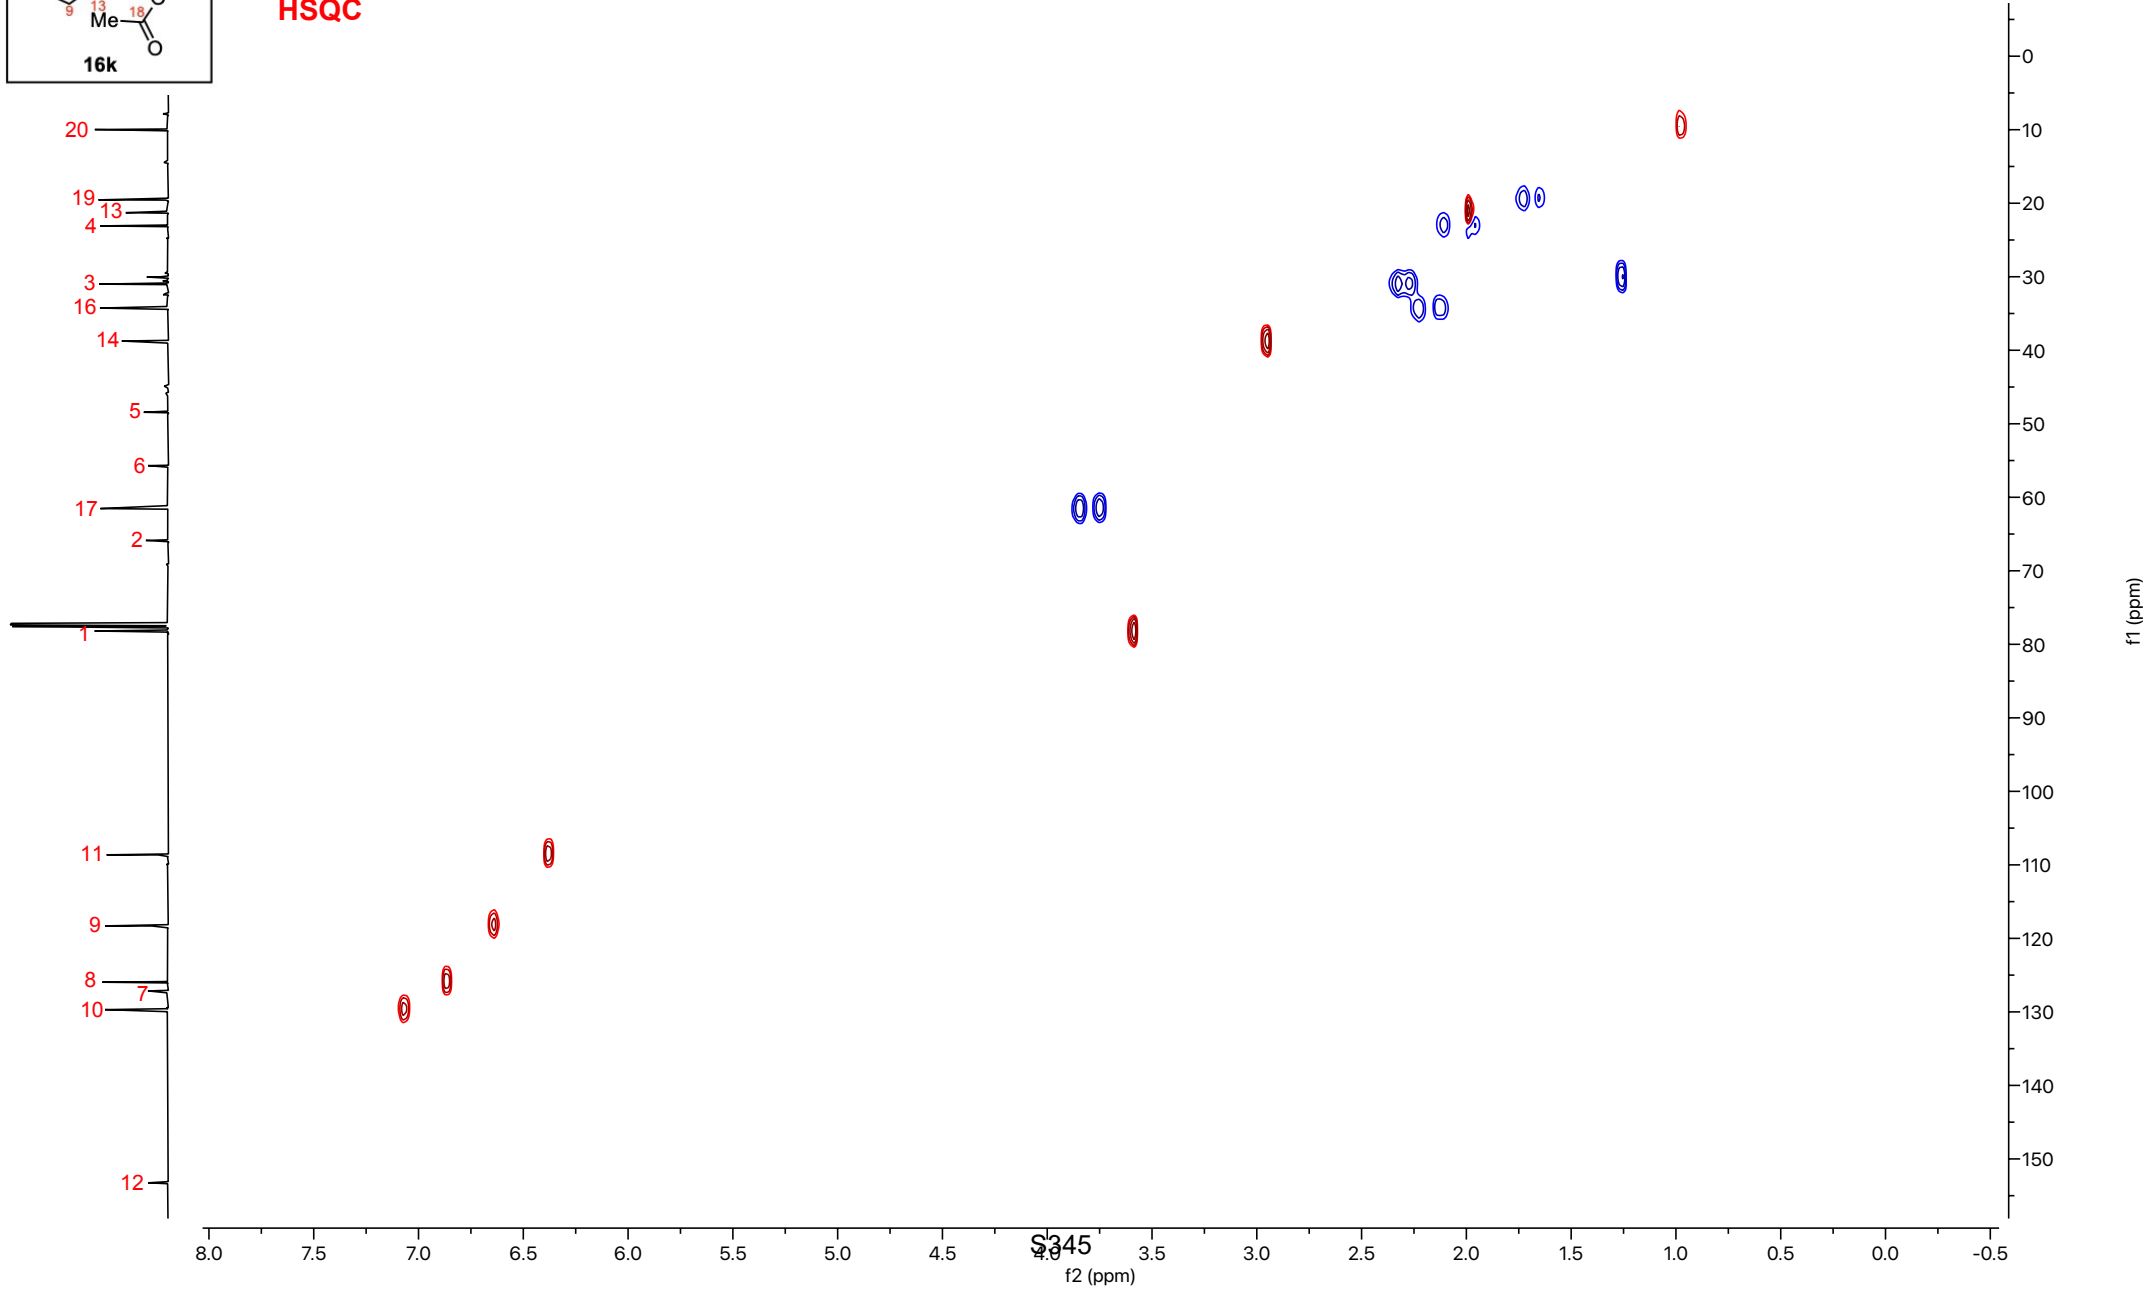

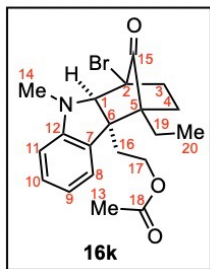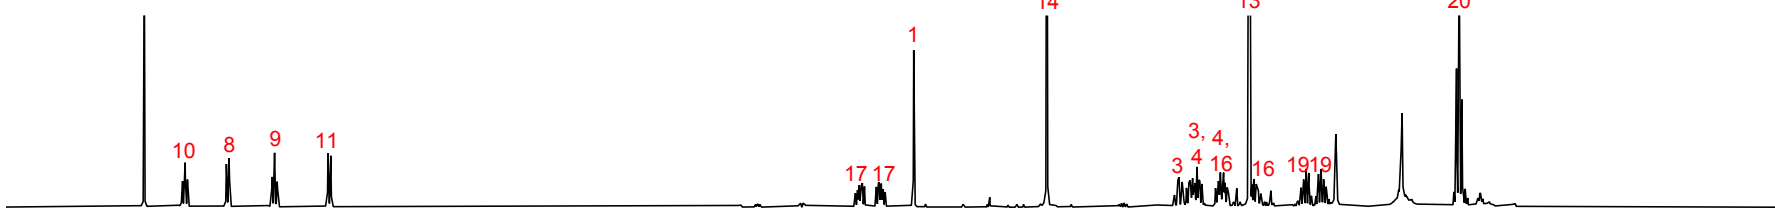

**HMBC**

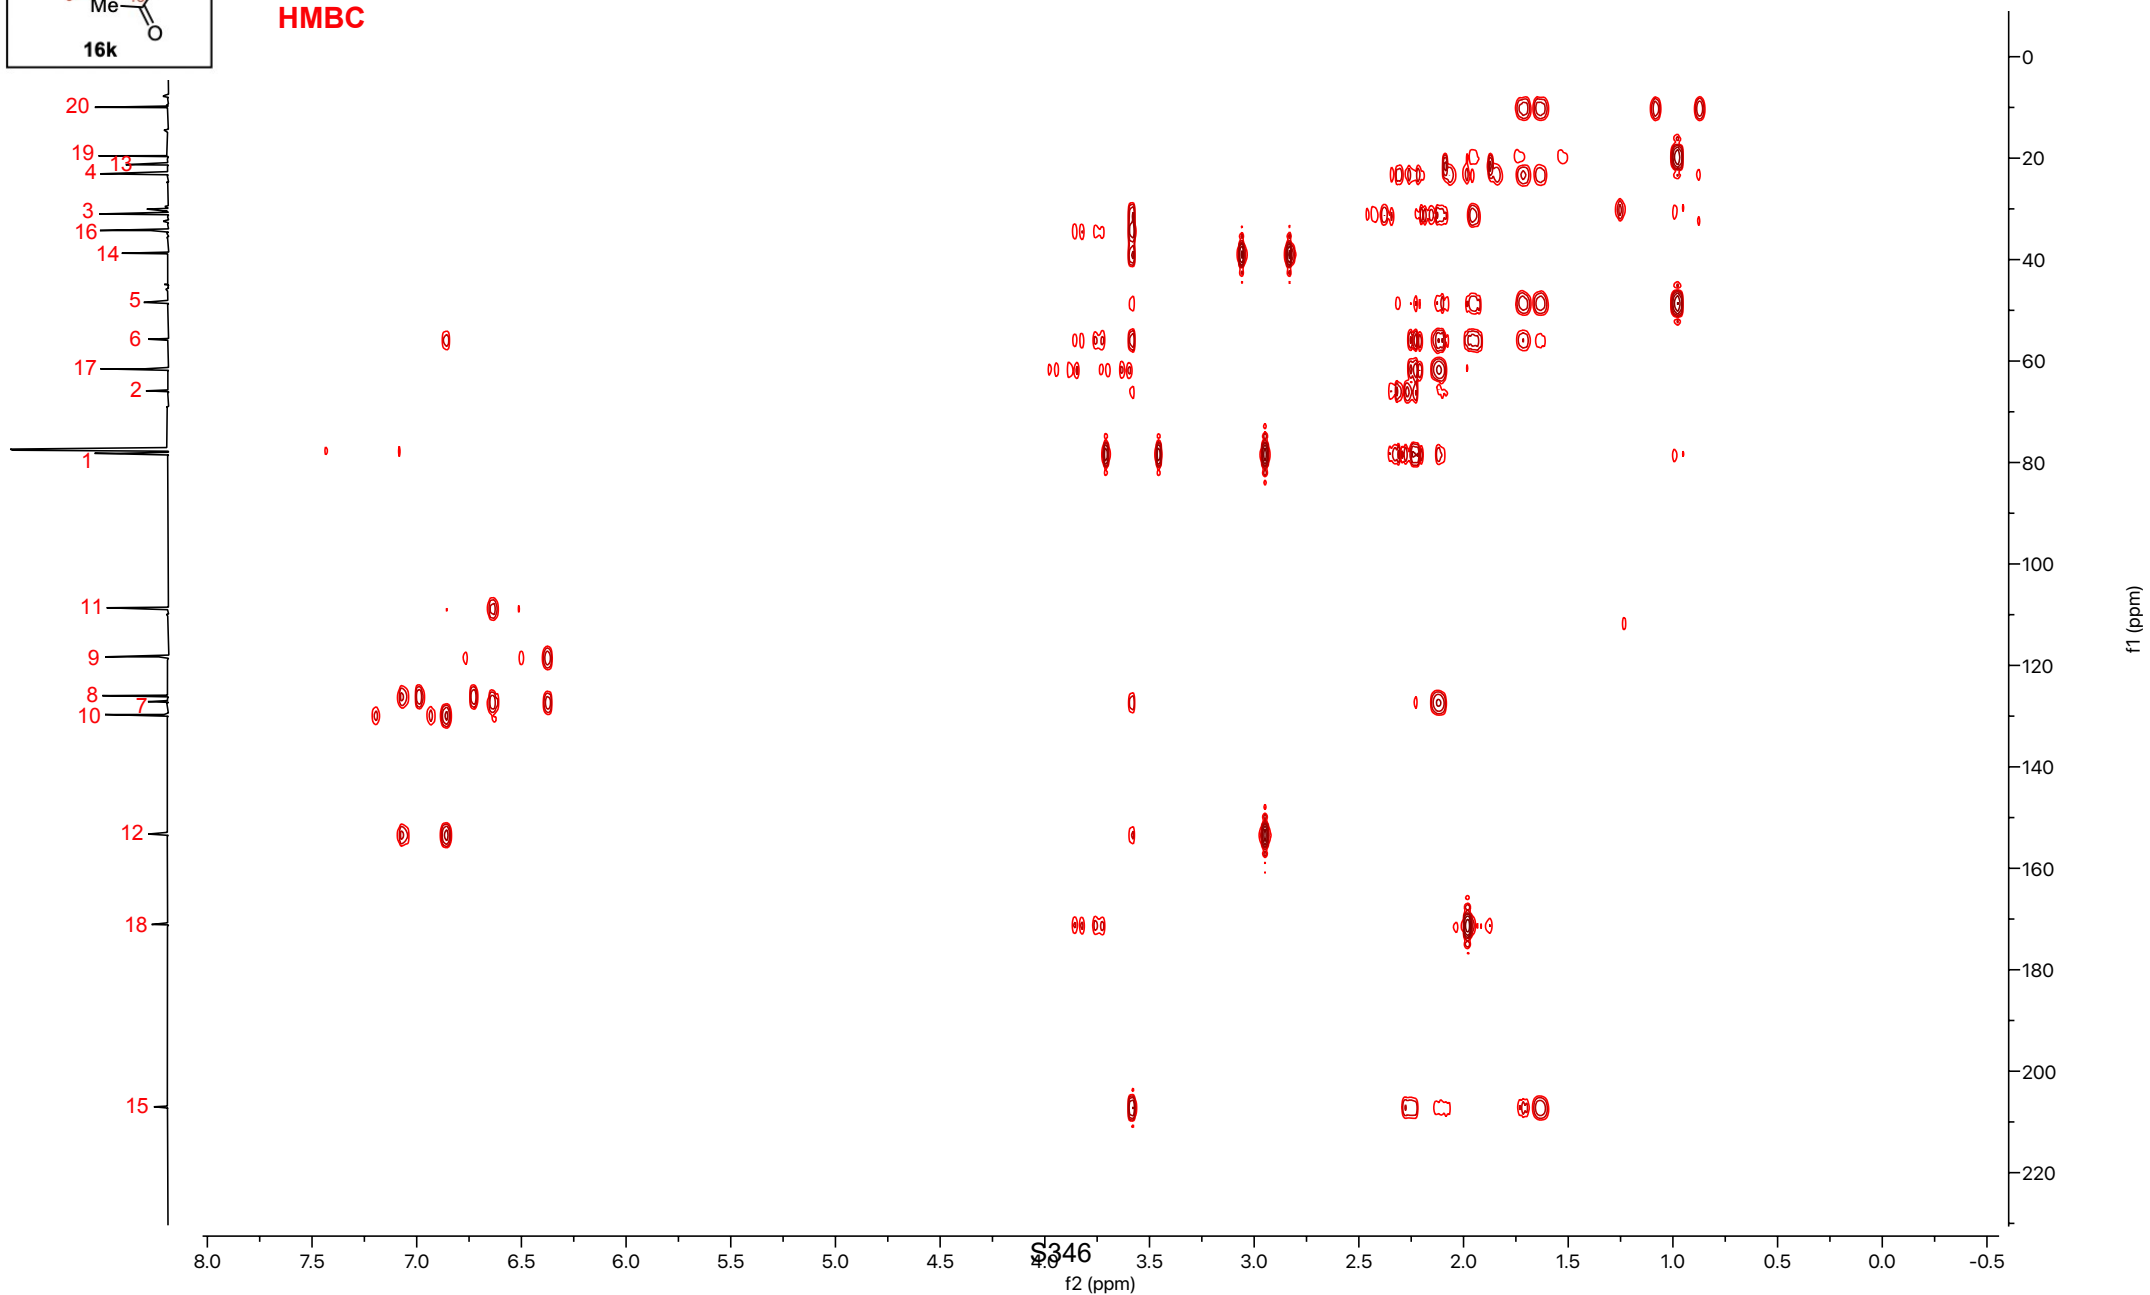

7.12  
7.12  
7.11  
7.11  
7.10  
7.09  
6.92  
6.92  
6.91  
6.91  
6.60  
6.60  
6.58  
6.58  
6.57  
6.57  
6.37  
6.35

3.59  
3.59  
3.58  
3.58

2.78

2.33  
2.32  
2.31  
1.79  
1.78  
1.78  
1.77  
1.77  
1.75  
1.65  
1.65  
1.64  
1.64  
1.63  
1.63  
1.62  
1.62  
1.48  
1.47  
1.46  
1.46  
1.45  
1.45  
1.44  
1.44  
1.43  
1.37  
1.36  
1.36  
1.36  
1.35  
1.35  
1.34  
1.34  
1.34  
1.34  
1.21  
1.08  
1.07

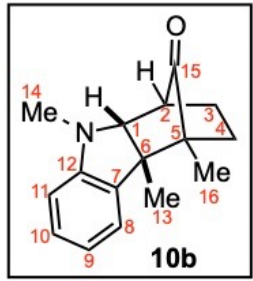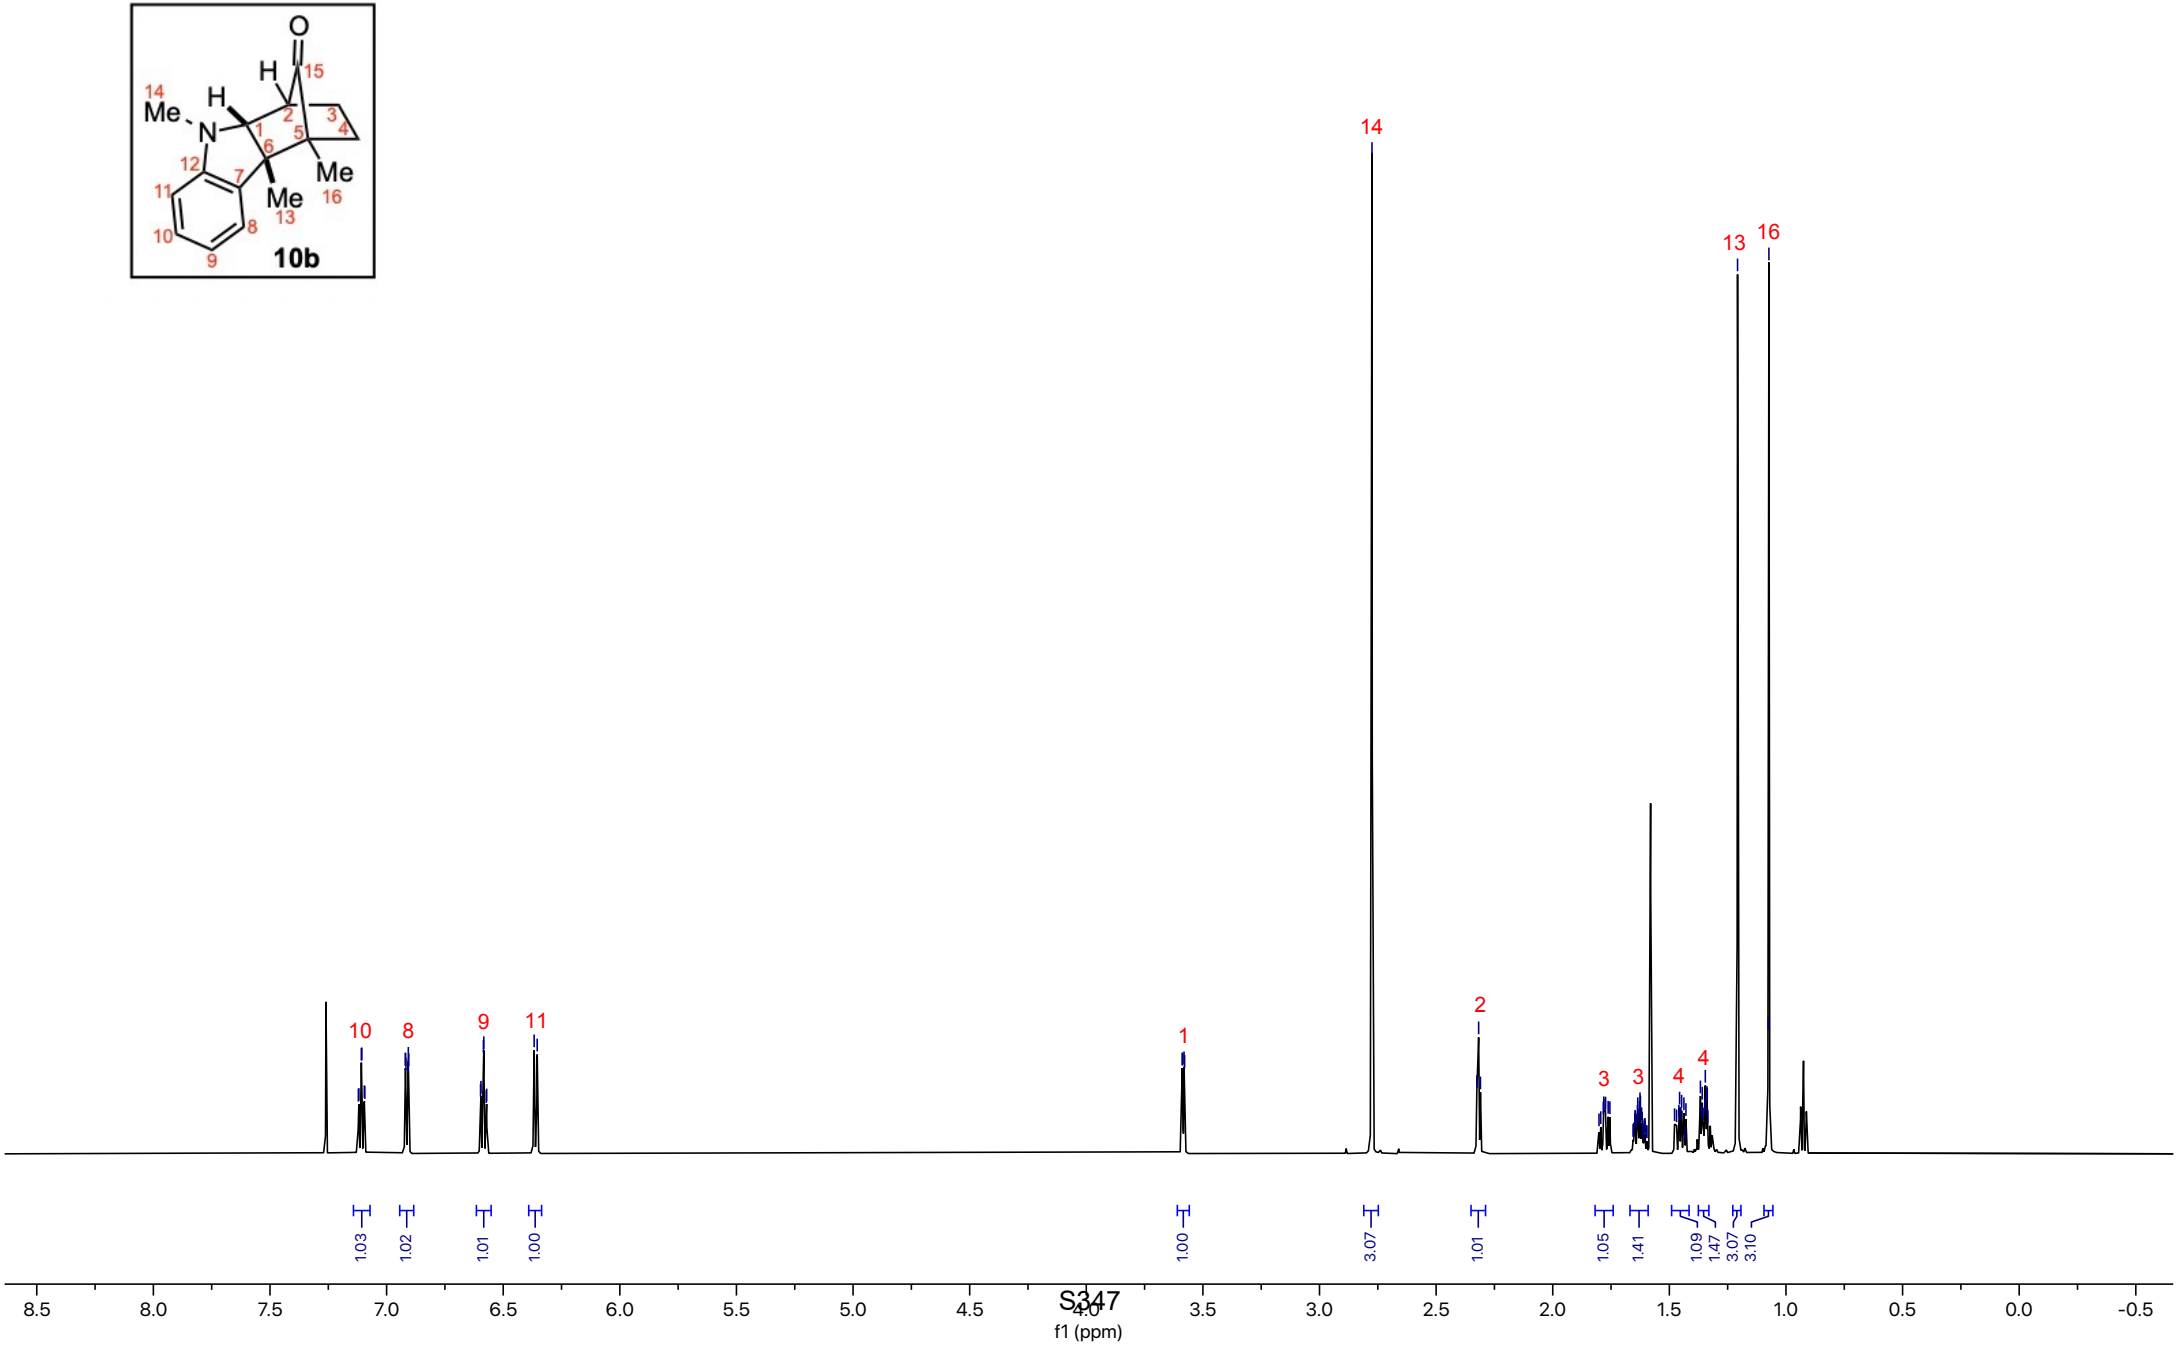

215.98

153.57

131.85

128.82

124.15

116.65

104.86

71.65

49.59

48.89

44.28

33.04

28.17

26.05

17.28

11.64

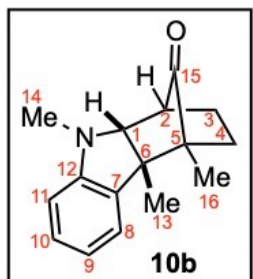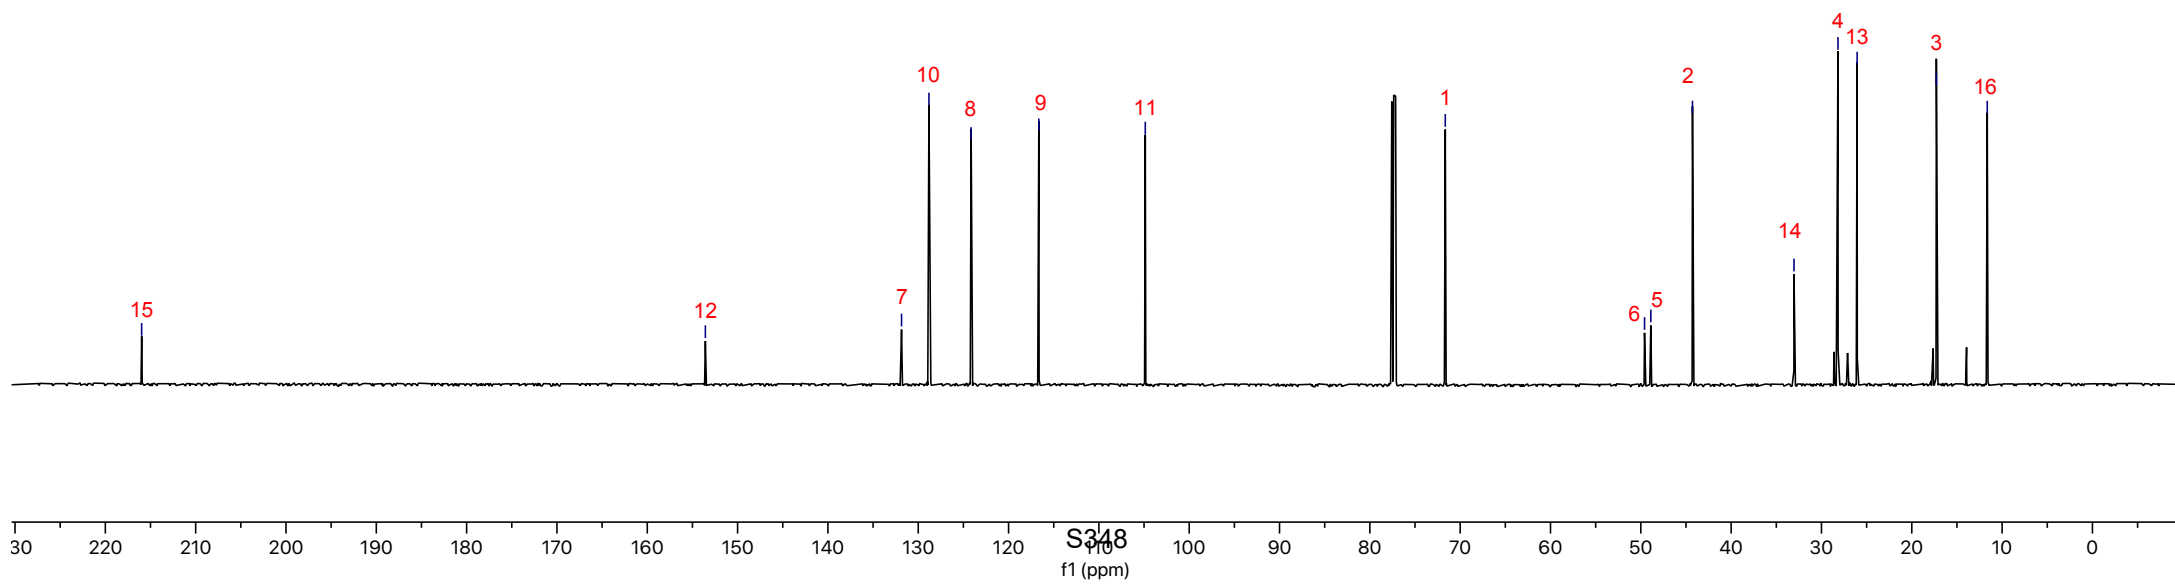

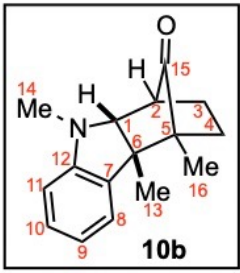

**COSY**

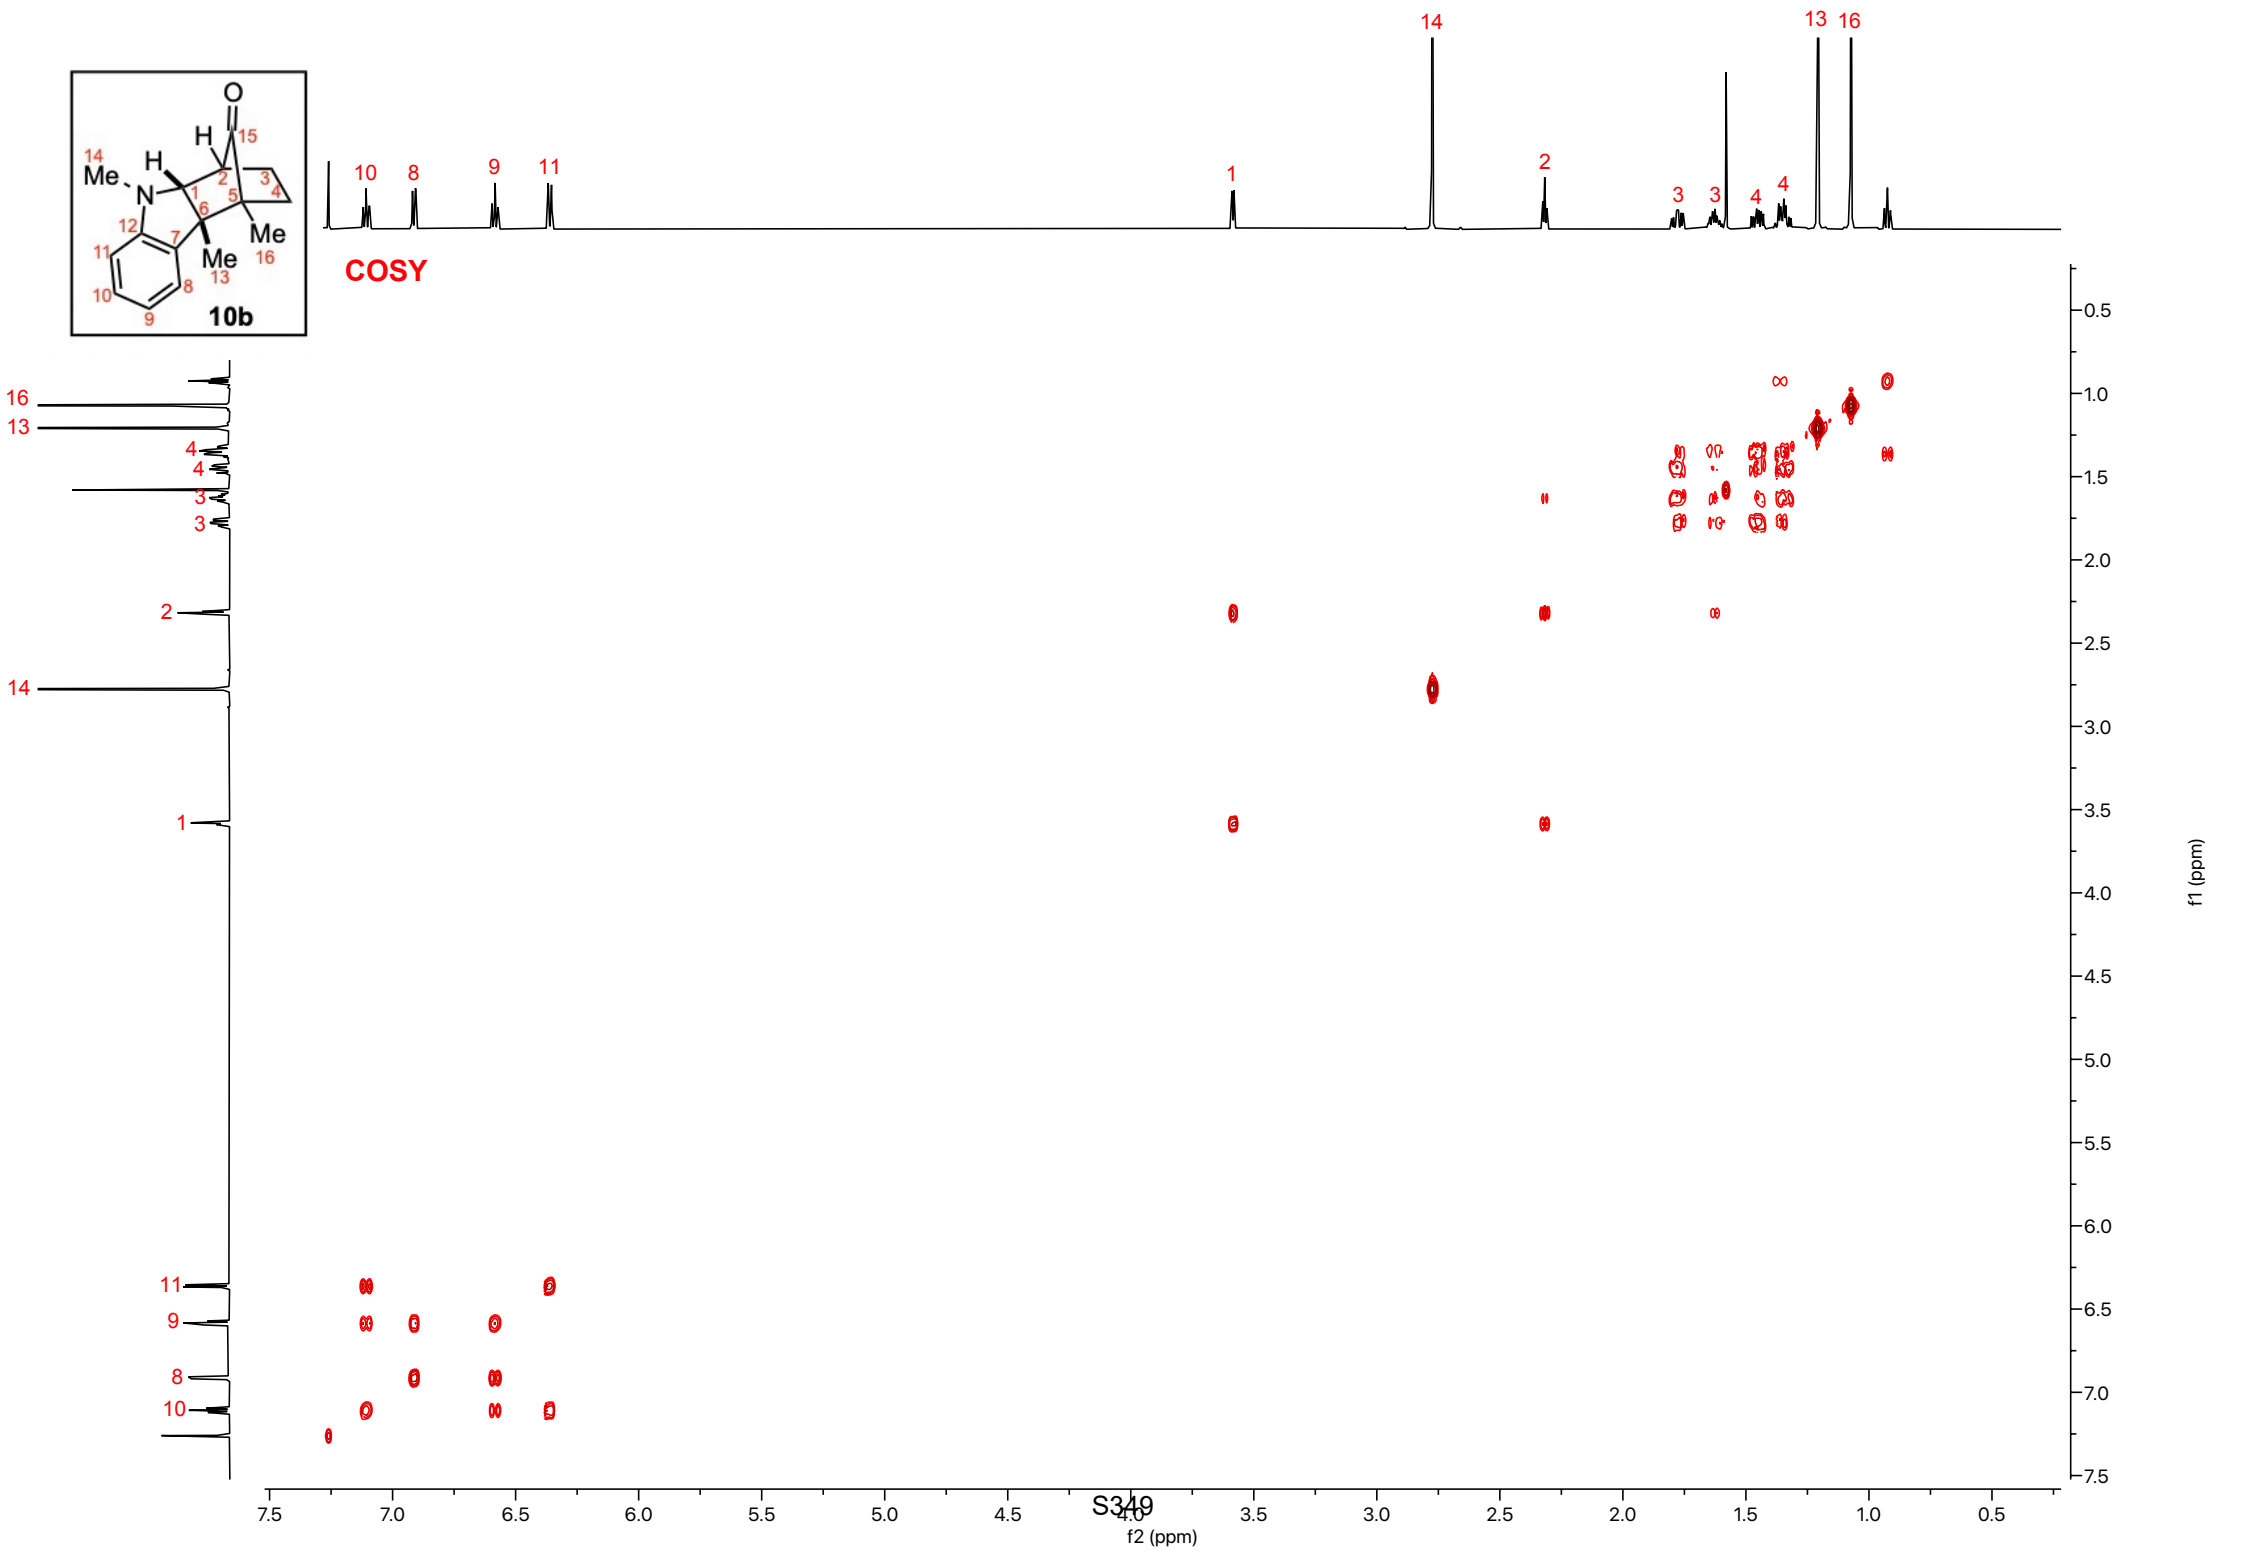

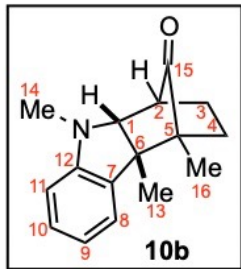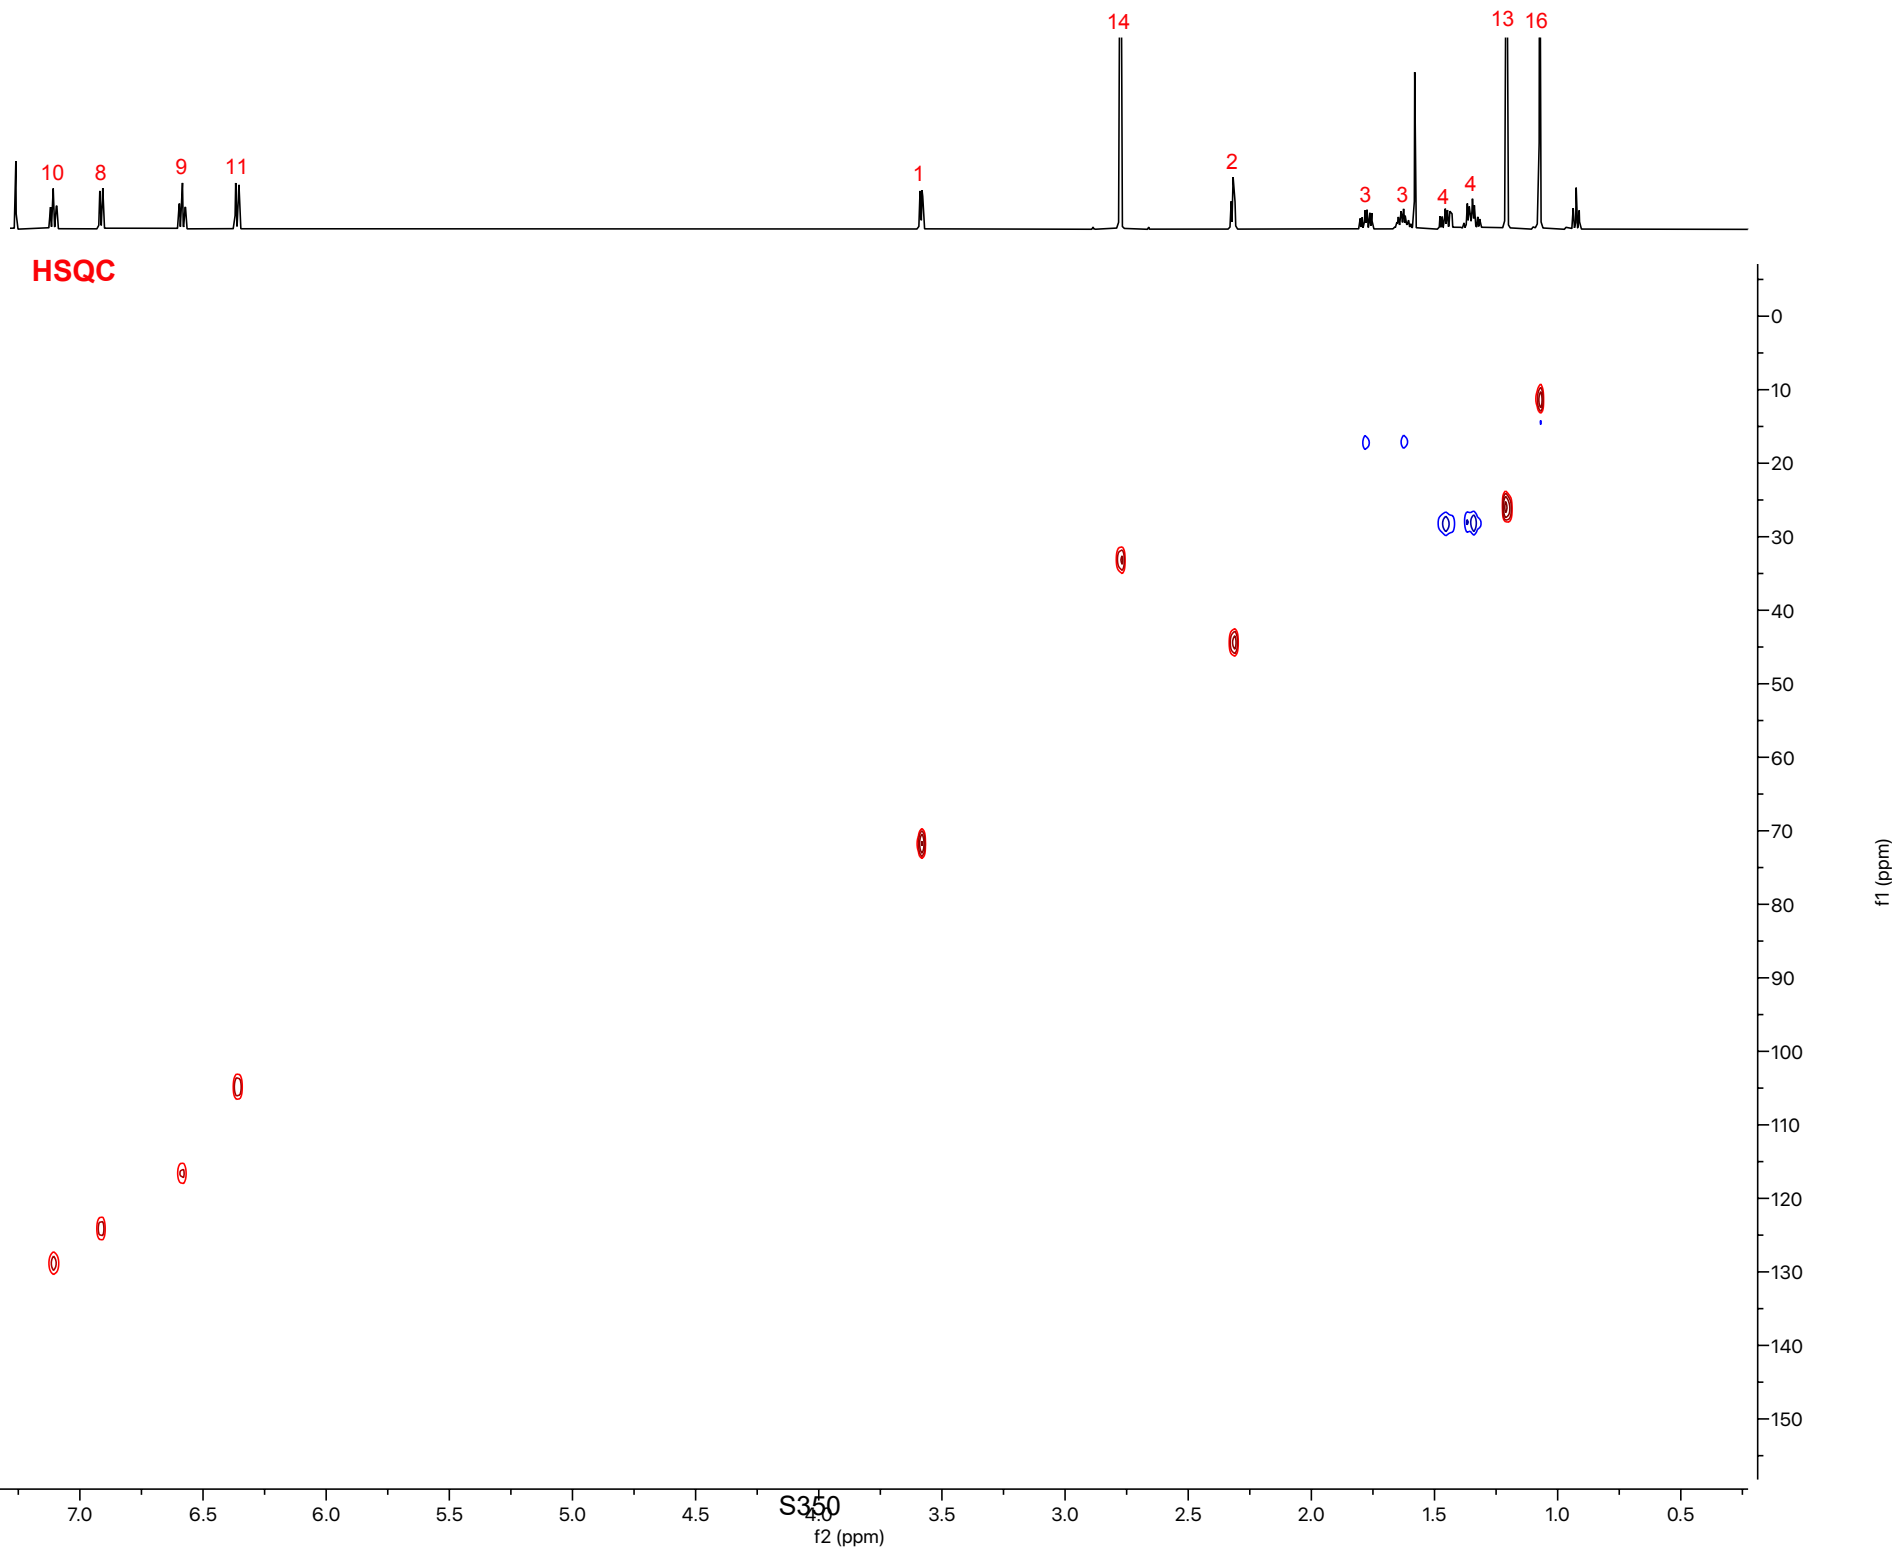

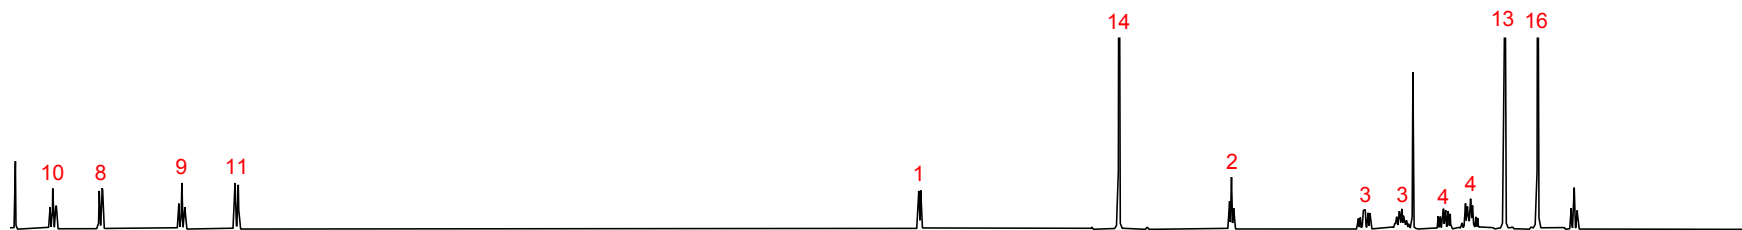

**HMBC**

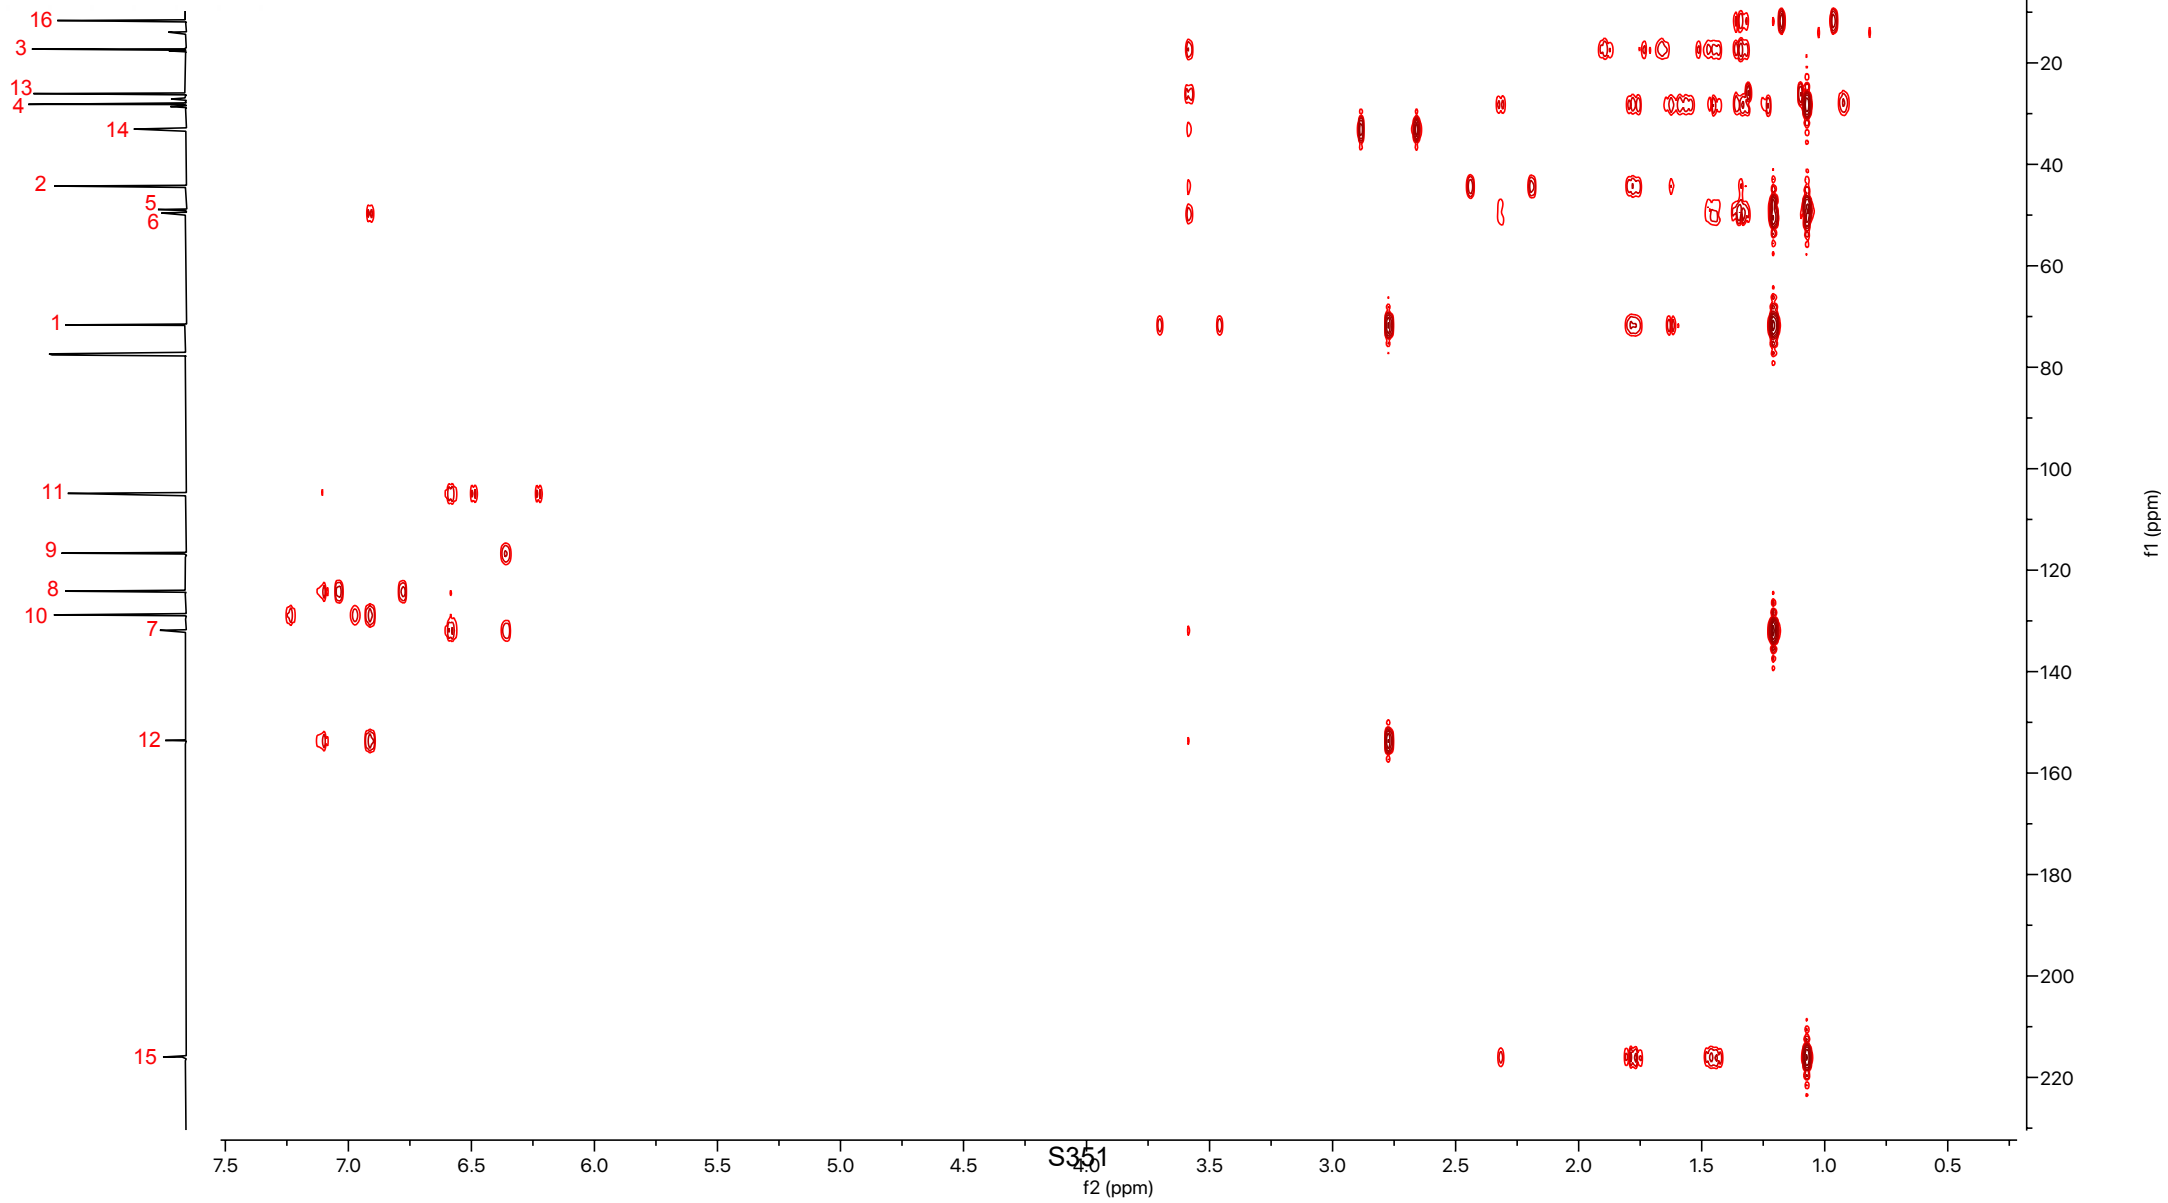

Supplement: d2sc06999g1.pdf [file d2sc06999g1.pdf]
